# Supplementary material for: Domain coupling in allosteric regulation of SthK measured using time-resolved transition metal ion FRET
Source: eLife. 2025 Aug 12;14:RP106892. doi: 10.7554/eLife.106892 (PMC12342821; doi:10.7554/eLife.106892)
Supplement: Figure 2—source data 1. [file elife-106892-fig2-data1.xlsx]

## Sheet: Figure2_B
	B- Representative Traces								B- Weighted Residuals
	SthKCterm:S361Acd		SthKCterm:S361Acd-V416C			Norm IRF			SthKCterm:S361Acd		SthKCterm:S361Acd-V416C
Time (sec)	+[Ru(bpy)2phenM]2+	+[Ru(bpy)2phenM]2+ + 320uM cAMP	+[Ru(bpy)2phenM]2+	+[Ru(bpy)2phenM]2+ +1uM cAMP	+[Ru(bpy)2phenM]2+ +320uM cAMP			Time (sec)	+[Ru(bpy)2phenM]2+	+[Ru(bpy)2phenM]2+ + 320uM cAMP	+[Ru(bpy)2phenM]2+	+[Ru(bpy)2phenM]2+ +1uM cAMP	+[Ru(bpy)2phenM]2+ +320uM cAMP
0	0.000801068	0.000411692	0.000140924	0.000357462	0	0.000152404		0	0.800798	-0.127392	-0.579274	-0.435256	-0.937503
2.5e-11	0.000801068	0	0.000281849	0.000714924	0.000189897	0		2.5e-11	0.800798	-1.06572	0.17219	-0.435256	0.12916
5e-11	0	0.000411692	0.000281849	0	0.000189897	0		5e-11	-1.37733	-0.127392	0.17219	0.370524	0.12916
7.5e-11	0.000801068	0.000411692	0.000704622	0	0.000569692	0		7.5e-11	0.800798	-0.127392	2.42658	0.370524	2.26249
1e-10	0.000267023	0.000411692	0.000563698	0.000178731	0.00075959	0		1e-10	-0.651287	-0.127392	1.67512	0.370524	3.32915
1.25e-10	0	0.000411692	0.000281849	0.000536193	0.000189897	0		1.25e-10	-1.37733	-0.127392	0.17219	1.1763	0.12916
1.5e-10	0.000267023	0.000411692	0	0.000178731	0.000379795	0		1.5e-10	-0.651287	-0.127392	-1.33074	-0.435256	1.19582
1.75e-10	0.000267023	0	0.000281849	0.000178731	0	7.62021e-05		1.75e-10	-0.651287	-1.06572	0.17219	1.1763	-0.937503
2e-10	0.000801068	0.000823384	0.000422773	0.000357462	0.000379795	0		2e-10	0.800798	0.810939	0.923653	0.370524	1.19582
2.25e-10	0.000534045	0	0.000422773	0.000178731	0	0		2.25e-10	0.0747552	-1.06572	0.923653	0.370524	-0.937503
2.5e-10	0	0	0.000140924	0	0	0		2.5e-10	-1.37733	-1.06572	-0.579274	-0.435256	-0.937503
2.75e-10	0	0.000411692	0.000140924	0	0.000379795	0		2.75e-10	-1.37733	-0.127392	-0.579274	1.1763	1.19582
3e-10	0	0	0.000140924	0	0.000189897	7.62021e-05		3e-10	-1.37733	-1.06572	-0.579274	1.1763	0.12916
3.25e-10	0.000534045	0.000411692	0.000140924	0	0	0		3.25e-10	0.0747552	-0.127392	-0.579274	-1.24103	-0.937503
3.5e-10	0.000267023	0.000411692	0.000140924	0	0.000189897	0		3.5e-10	-0.651287	-0.127392	-0.579274	-1.24103	0.12916
3.75e-10	0.000534045	0.000823384	0	0.000536193	0	0		3.75e-10	0.0747552	0.810939	-1.33074	-0.435256	-0.937503
4e-10	0	0.000411692	0	0.000178731	0.000189897	7.62021e-05		4e-10	-1.37733	-0.127392	-1.33074	0.370524	0.12916
4.25e-10	0.000534045	0	0.000422773	0.000357462	0	7.62021e-05		4.25e-10	0.0747552	-1.06572	0.923653	1.98208	-0.937503
4.5e-10	0.000267023	0.00123508	0.000422773	0.000357462	0	0		4.5e-10	-0.651287	1.74927	0.923653	-0.435256	-0.937503
4.75e-10	0.000534045	0.000411692	0.000422773	0	0.000189897	7.62021e-05		4.75e-10	0.0747552	-0.127392	0.923653	0.370524	0.12916
5e-10	0	0	0.000140924	0	0.000189897	0		5e-10	-1.37733	-1.06572	-0.579274	-0.435256	0.12916
5.25e-10	0.000267023	0	0.000422773	0.000357462	0.000189897	0		5.25e-10	-0.651287	-1.06572	0.923653	0.370524	0.12916
5.5e-10	0.000534045	0.000823384	0.000140924	0	0.000189897	0		5.5e-10	0.0747552	0.810939	-0.579274	0.370524	0.12916
5.75e-10	0.000267023	0	0.000140924	0	0.000189897	0		5.75e-10	-0.651287	-1.06572	-0.579274	-0.435256	0.12916
6e-10	0.000534045	0.000411692	0.000563698	0	0.000569692	0		6e-10	0.0747552	-0.127392	1.67512	-1.24103	2.26249
6.25e-10	0.000267023	0.000411692	0.000140924	0	0.000379795	7.62021e-05		6.25e-10	-0.651287	-0.127392	-0.579274	1.1763	1.19582
6.5e-10	0	0	0.000422773	0	0	7.62021e-05		6.5e-10	-1.37733	-1.06572	0.923653	0.370524	-0.937503
6.75e-10	0.000267023	0	0.000140924	0.000357462	0.000189897	7.62021e-05		6.75e-10	-0.651287	-1.06572	-0.579274	-0.435256	0.12916
7e-10	0.000801068	0	0.000422773	0	0.000189897	7.62021e-05		7e-10	0.800798	-1.06572	0.923653	-1.24103	0.12916
7.25e-10	0	0	0.000422773	0.000178731	0.000379795	0		7.25e-10	-1.37733	-1.06572	0.923653	1.98208	1.19582
7.5e-10	0.000267023	0	0.000140924	0.000357462	0	0		7.5e-10	-0.651287	-1.06572	-0.579274	1.1763	-0.937503
7.75e-10	0.000267023	0.000823384	0.000281849	0.000357462	0.000189897	7.62021e-05		7.75e-10	-0.651287	0.810939	0.17219	0.370524	0.12916
8e-10	0.000267023	0.000411692	0.000281849	0.000536193	0.000189897	0		8e-10	-0.651287	-0.127392	0.17219	-0.435256	0.12916
8.25e-10	0	0.000411692	0.000845547	0	0.000379795	0		8.25e-10	-1.37733	-0.127392	3.17804	0.370524	1.19582
8.5e-10	0	0.000823384	0	0.000357462	0.000189897	0		8.5e-10	-1.37733	0.810939	-1.33074	2.78786	0.12916
8.75e-10	0.000534045	0	0.000140924	0.000178731	0.000569692	0		8.75e-10	0.0747552	-1.06572	-0.579274	-1.24103	2.26249
9e-10	0.000534045	0.000411692	0.000281849	0.000357462	0.000569692	0.000152404		9e-10	0.0747552	-0.127392	0.17219	-0.435256	2.26249
9.25e-10	0.000267023	0.00123508	0.000140924	0.000178731	0	0		9.25e-10	-0.651287	1.74927	-0.579274	-0.435256	-0.937503
9.5e-10	0.000534045	0	0.000140924	0.000178731	0.000379795	0		9.5e-10	0.0747552	-1.06572	-0.579274	-1.24103	1.19582
9.75e-10	0.000267023	0	0.000563698	0.000178731	0.000569692	0		9.75e-10	-0.651287	-1.06572	1.67512	-0.435256	2.26249
1e-09	0.000267023	0.000411692	0.000704622	0.000178731	0.000379795	0		1e-09	-0.651287	-0.127392	2.42658	-0.435256	1.19582
1.025e-09	0.000267023	0	0.000140924	0.000178731	0.000189897	0		1.025e-09	-0.651287	-1.06572	-0.579274	-1.24103	0.12916
1.05e-09	0	0.000411692	0.000140924	0.000357462	0.000189897	0		1.05e-09	-1.37733	-0.127392	-0.579274	-0.435256	0.12916
1.075e-09	0.000801068	0	0.000140924	0	0.000379795	0		1.075e-09	0.800798	-1.06572	-0.579274	0.370524	1.19582
1.1e-09	0	0.000411692	0.000140924	0.000714924	0	0		1.1e-09	-1.37733	-0.127392	-0.579274	-1.24103	-0.937503
1.125e-09	0.000534045	0.000823384	0.000281849	0.000536193	0	7.62021e-05		1.125e-09	0.0747552	0.810939	0.17219	0.370524	-0.937503
1.15e-09	0.000267023	0	0.000422773	0.000178731	0.000379795	7.62021e-05		1.15e-09	-0.651287	-1.06572	0.923653	0.370524	1.19582
1.175e-09	0.000267023	0	0	0.000714924	0.000189897	0		1.175e-09	-0.651287	-1.06572	-1.33074	-0.435256	0.12916
1.2e-09	0.000267023	0	0.000140924	0.000357462	0	0		1.2e-09	-0.651287	-1.06572	-0.579274	-0.435256	-0.937503
1.225e-09	0	0	0.000281849	0	0.000189897	0		1.225e-09	-1.37733	-1.06572	0.17219	-1.24103	0.12916
1.25e-09	0	0.000411692	0.000422773	0.000178731	0.000379795	0		1.25e-09	-1.37733	-0.127392	0.923653	0.370524	1.19582
1.275e-09	0.000801068	0.000823384	0.000563698	0.000178731	0.000379795	0		1.275e-09	0.800798	0.810939	1.67512	-1.24103	1.19582
1.3e-09	0	0	0.000281849	0.000178731	0	0		1.3e-09	-1.37733	-1.06572	0.17219	1.1763	-0.937503
1.325e-09	0	0.000411692	0.000422773	0.000178731	0	0		1.325e-09	-1.37733	-0.127392	0.923653	-1.24103	-0.937503
1.35e-09	0.000534045	0	0.000422773	0.000178731	0.000189897	0		1.35e-09	0.0747552	-1.06572	0.923653	-1.24103	0.12916
1.375e-09	0.00133511	0.000411692	0.000140924	0.000178731	0	0		1.375e-09	2.25288	-0.127392	-0.579274	-0.435256	-0.937503
1.4e-09	0.000267023	0	0.000281849	0.000536193	0.000189897	0		1.4e-09	-0.651287	-1.06572	0.17219	-0.435256	0.12916
1.425e-09	0.000267023	0.000411692	0	0	0.000569692	0		1.425e-09	-0.651287	-0.127392	-1.33074	1.98208	2.26249
1.45e-09	0.000534045	0	0.000281849	0.000357462	0	0		1.45e-09	0.0747552	-1.06572	0.17219	0.370524	-0.937503
1.475e-09	0.000801068	0.000411692	0.000422773	0.000178731	0	0		1.475e-09	0.800798	-0.127392	0.923653	-0.435256	-0.937503
1.5e-09	0	0.000411692	0.000422773	0.000178731	0.000189897	7.62021e-05		1.5e-09	-1.37733	-0.127392	0.923653	0.370524	0.12916
1.525e-09	0.000534045	0	0.000281849	0	0	0		1.525e-09	0.0747552	-1.06572	0.17219	2.78786	-0.937503
1.55e-09	0.000534045	0.000411692	0.000563698	0.000178731	0	0		1.55e-09	0.0747552	-0.127392	1.67512	1.1763	-0.937503
1.575e-09	0.000267023	0.000411692	0.000140924	0.000178731	0.000189897	0		1.575e-09	-0.651287	-0.127392	-0.579274	0.370524	0.12916
1.6e-09	0.000267023	0	0.000281849	0	0	0		1.6e-09	-0.651287	-1.06572	0.17219	-1.24103	-0.937503
1.625e-09	0	0	0.000281849	0.000536193	0	0		1.625e-09	-1.37733	-1.06572	0.17219	1.98208	-0.937503
1.65e-09	0	0	0.000140924	0.000178731	0.000189897	0		1.65e-09	-1.37733	-1.06572	-0.579274	1.1763	0.12916
1.675e-09	0.000801068	0	0.000140924	0.000357462	0	0		1.675e-09	0.800798	-1.06572	-0.579274	1.1763	-0.937503
1.7e-09	0.000534045	0.000411692	0.000140924	0.000357462	0	0		1.7e-09	0.0747552	-0.127392	-0.579274	0.370524	-0.937503
1.725e-09	0.000801068	0.000411692	0.000422773	0	0.000189897	0		1.725e-09	0.800798	-0.127392	0.923653	-0.435256	0.12916
1.75e-09	0.000534045	0	0.000140924	0	0	0		1.75e-09	0.0747552	-1.06572	-0.579274	1.1763	-0.937503
1.775e-09	0	0	0.000422773	0.000178731	0	0		1.775e-09	-1.37733	-1.06572	0.923653	-1.24103	-0.937503
1.8e-09	0.000267023	0.000411692	0.000281849	0.000178731	0.000189897	0		1.8e-09	-0.651287	-0.127392	0.17219	-0.435256	0.12916
1.825e-09	0	0	0.000281849	0.000178731	0.000189897	7.62021e-05		1.825e-09	-1.37733	-1.06572	0.17219	-0.435256	0.12916
1.85e-09	0.00106809	0.000823384	0.000704622	0.000536193	0.000379795	0		1.85e-09	1.52684	0.810939	2.42658	1.1763	1.19582
1.875e-09	0.000534045	0	0.000422773	0.000178731	0	7.62021e-05		1.875e-09	0.0747552	-1.06572	0.923653	-1.24103	-0.937503
1.9e-09	0.000267023	0.000411692	0.000140924	0.000536193	0.000189897	0		1.9e-09	-0.651287	-0.127392	-0.579274	-0.435256	0.12916
1.925e-09	0.000534045	0.000823384	0	0	0.000189897	0		1.925e-09	0.0747552	0.810939	-1.33074	0.370524	0.12916
1.95e-09	0	0.000411692	0.0011274	0.000178731	0	0		1.95e-09	-1.37733	-0.127392	4.68097	-1.24103	-0.937503
1.975e-09	0.00106809	0.000411692	0.000422773	0	0.000189897	0		1.975e-09	1.52684	-0.127392	0.923653	1.1763	0.12916
2e-09	0.000267023	0.000823384	0.000422773	0.000357462	0	0		2e-09	-0.651287	0.810939	0.923653	1.1763	-0.937503
2.025e-09	0	0	0.000281849	0.000178731	0	0		2.025e-09	-1.37733	-1.06572	0.17219	-0.435256	-0.937503
2.05e-09	0.000267023	0.000411692	0.000704622	0.000536193	0	0		2.05e-09	-0.651287	-0.127392	2.42658	2.78786	-0.937503
2.075e-09	0.000534045	0.000411692	0.000422773	0	0	7.62021e-05		2.075e-09	0.0747552	-0.127392	0.923653	0.370524	-0.937503
2.1e-09	0.000534045	0.000411692	0.000281849	0.000178731	0.000189897	0		2.1e-09	0.0747552	-0.127392	0.17219	0.370524	0.12916
2.125e-09	0	0	0.000422773	0.000178731	0.000189897	0		2.125e-09	-1.37733	-1.06572	0.923653	1.1763	0.12916
2.15e-09	0	0	0.000422773	0	0	0		2.15e-09	-1.37733	-1.06572	0.923653	-1.24103	-0.937503
2.175e-09	0.000534045	0.000823384	0.000563698	0.000536193	0.000379795	0		2.175e-09	0.0747552	0.810939	1.67512	-1.24103	1.19582
2.2e-09	0.000267023	0.000411692	0.000281849	0	0.000949487	0		2.2e-09	-0.651287	-0.127392	0.17219	-0.435256	4.39581
2.225e-09	0.000801068	0	0	0.000357462	0.000379795	0		2.225e-09	0.800798	-1.06572	-1.33074	1.1763	1.19582
2.25e-09	0.000801068	0	0.000563698	0.000357462	0.000379795	0		2.25e-09	0.800798	-1.06572	1.67512	1.1763	1.19582
2.275e-09	0	0.000411692	0.000422773	0	0.000189897	0		2.275e-09	-1.37733	-0.127392	0.923653	0.370524	0.12916
2.3e-09	0.000267023	0.000411692	0.000422773	0.000536193	0	0		2.3e-09	-0.651287	-0.127392	0.923653	1.1763	-0.937503
2.325e-09	0.000801068	0.00123508	0.000563698	0.000357462	0.000379795	7.62021e-05		2.325e-09	0.800798	1.74927	1.67512	1.1763	1.19582
2.35e-09	0.000534045	0	0.000563698	0.000178731	0.000379795	7.62021e-05		2.35e-09	0.0747552	-1.06572	1.67512	-0.435256	1.19582
2.375e-09	0.000267023	0	0.000422773	0.000357462	0	7.62021e-05		2.375e-09	-0.651287	-1.06572	0.923653	0.370524	-0.937503
2.4e-09	0.000534045	0.000823384	0.000281849	0	0.000189897	0		2.4e-09	0.0747552	0.810939	0.17219	-1.24103	0.12916
2.425e-09	0	0	0.000281849	0.000536193	0	0		2.425e-09	-1.37733	-1.06572	0.17219	-0.435256	-0.937503
2.45e-09	0.000534045	0.000823384	0.000563698	0.000178731	0.000379795	0		2.45e-09	0.0747552	0.810939	1.67512	-0.435256	1.19582
2.475e-09	0.000267023	0	0.000140924	0.000178731	0.000189897	0		2.475e-09	-0.677362	-1.06572	-0.579274	-0.496596	0.12916
2.5e-09	0.000534045	0	0.000281849	0.000178731	0	0		2.5e-09	0.0260776	-1.06572	0.17219	0.219973	-0.963408
2.525e-09	0.000534045	0.00123508	0.000140924	0.000357462	0	0		2.525e-09	0.027959	1.74927	-0.579274	0.980794	-0.977323
2.55e-09	0.000801068	0.000823384	0	0	0.000189897	0		2.55e-09	0.743785	0.810939	-1.3356	0.226586	0.0535503
2.575e-09	0.000534045	0.000823384	0.000422773	0.000178731	0	0		2.575e-09	0.0302955	0.810939	0.829032	-1.33021	-0.971448
2.6e-09	0.000267023	0	0.000140924	0.000178731	0.000569692	7.62021e-05		2.6e-09	-0.683885	-1.06572	-0.645264	-0.584675	2.12245
2.625e-09	0	0.000411692	0.000281849	0.000178731	0.000379795	0		2.625e-09	-1.39852	-0.127392	-0.03423	-0.618832	1.01758
2.65e-09	0.000534045	0.000411692	0.000422773	0.000178731	0	0.000152404		2.65e-09	0.0130191	-0.146307	0.667072	1.58318	-1.00686
2.675e-09	0.000534045	0.000411692	0.000422773	0.000536193	0.000189897	0		2.675e-09	-0.000789868	-0.155303	0.604382	-0.656275	-0.0985474
2.7e-09	0.000267023	0.00123508	0	0.000357462	0	7.62021e-05		2.7e-09	-0.706502	1.66304	-1.45174	2.14238	-1.07332
2.725e-09	0.000534045	0.000411692	0.000422773	0.000178731	0.000189897	0		2.725e-09	0.00198207	-0.232943	0.610151	-0.735069	-0.167999
2.75e-09	0.000801068	0.000823384	0.000422773	0.00125112	0	0		2.75e-09	0.576212	0.600894	0.525461	0.60311	-1.11687
2.775e-09	0.000534045	0.000823384	0.000704622	0.00107239	0.000949487	7.62021e-05		2.775e-09	-0.213421	0.550967	1.65283	1.82471	3.22737
2.8e-09	0	0.000823384	0.00126832	0.000536193	0.000189897	0.000152404		2.8e-09	-1.53399	0.406985	3.71705	-0.379825	-0.384489
2.825e-09	0.000801068	0.00123508	0.000986471	0.00160858	0.00075959	0.000304808		2.825e-09	0.373023	1.06037	2.19393	1.98602	1.79694
2.85e-09	0.00213618	0.00164677	0.00126832	0.000893655	0.00113938	0.000304808		2.85e-09	3.41363	1.67154	3.0119	4.00498	2.94912
2.875e-09	0.00160214	0.000823384	0.00140924	0.000893655	0.000379795	0.000228606		2.875e-09	1.95501	-0.0155753	2.85425	1.77797	-0.054068
2.9e-09	0.00106809	0.00288184	0.000704622	0.00142985	0.00189897	0.000609617		2.9e-09	0.530354	3.1612	-0.0270139	0.4182	4.79652
2.925e-09	0.00186916	0.00329354	0.00126832	0.000714924	0.00208887	0.000762021		2.925e-09	1.83066	3.35646	1.19194	1.98293	4.5881
2.95e-09	0.00213618	0.00123508	0.00183202	0.00160858	0.00113938	0.000838223		2.95e-09	1.78062	-0.0635334	1.9969	4.22339	1.34525
2.975e-09	0.00267023	0.00370523	0.00267756	0.00160858	0.00132928	0.00121923		2.975e-09	2.2194	2.52459	3.10014	0.60242	1.30585
3e-09	0.0034713	0.00411692	0.00267756	0.00375335	0.00360805	0.00160024		3e-09	2.75955	2.29704	1.94023	1.20513	5.39565
3.025e-09	0.00400534	0.0049403	0.00338219	0.00375335	0.00303836	0.00228606		3.025e-09	2.52321	2.40684	1.99088	1.69042	2.59913
3.05e-09	0.00534045	0.0102923	0.00422773	0.00446828	0.00322826	0.00304808		3.05e-09	3.09623	6.1467	1.73456	0.837448	1.94463
3.075e-09	0.00747664	0.00741046	0.00605975	0.00500447	0.00550703	0.00495314		3.075e-09	3.86851	1.9909	2.45004	3.74408	3.97721
3.1e-09	0.00720961	0.0111157	0.00859639	0.00643432	0.00417774	0.00548655		3.1e-09	1.49783	2.13862	1.49137	1.97145	0.299969
3.125e-09	0.012016	0.0135858	0.0171928	0.0105451	0.0077858	0.0147832		3.125e-09	1.6117	-0.265453	1.94489	1.36806	1.34457
3.15e-09	0.0176235	0.0366406	0.0367813	0.0160858	0.0178504	0.0324621		3.15e-09	-0.975989	0.625419	-0.171158	3.67625	3.38305
3.175e-09	0.0488652	0.0786332	0.0927283	0.0321716	0.0317129	0.107597		3.175e-09	0.120121	-0.812101	0.0731006	-0.257496	0.417887
3.2e-09	0.111615	0.181556	0.199972	0.0832887	0.0810862	0.281033		3.2e-09	-0.489112	0.367064	0.704799	-0.453854	0.43806
3.225e-09	0.223765	0.324825	0.331595	0.181055	0.174136	0.570449		3.225e-09	-0.312342	0.344597	-1.46193	0.401241	-0.508053
3.25e-09	0.369025	0.466035	0.499295	0.340661	0.312002	0.852473		3.25e-09	-0.230989	-1.04781	-0.338211	-2.62121	-1.48154
3.275e-09	0.512684	0.623302	0.636556	0.49866	0.477402	1		3.275e-09	-0.897115	-0.370143	-0.945803	-0.580808	-1.43896
3.3e-09	0.666489	0.738576	0.757328	0.653262	0.658944	0.952069		3.3e-09	0.701452	-0.583598	-0.008212	-0.683136	1.04044
3.325e-09	0.76235	0.824207	0.840192	0.772118	0.787695	0.793188		3.325e-09	0.135749	-0.577785	0.196922	-0.296041	1.23789
3.35e-09	0.827503	0.884315	0.898816	0.889544	0.857577	0.615332		3.35e-09	-0.418405	-0.378412	0.57218	0.295745	-0.384459
3.375e-09	0.884913	0.940716	0.927424	0.93387	0.937334	0.45165		3.375e-09	0.146073	0.804606	-0.0263994	2.03046	1.21431
3.4e-09	0.935648	0.960478	0.950958	0.954245	0.980061	0.322487		3.4e-09	1.39656	0.894101	-0.0462148	2.91177	1.82894
3.425e-09	0.941789	0.974475	0.989994	0.993744	0.945499	0.237141		3.425e-09	0.559445	1.17776	1.94579	-0.16689	-1.99809
3.45e-09	0.957276	1	1	0.991063	0.995063	0.177094		3.45e-09	0.859034	2.34687	2.06312	0.30361	1.28973
3.475e-09	0.987717	0.949362	0.994081	0.999643	1	0.122076		3.475e-09	2.4385	-0.143397	1.19457	1.09791	1.90291
3.5e-09	0.972497	0.999588	0.967446	1	0.963919	0.0865656		3.5e-09	1.34884	2.55071	-1.18114	3.06307	-0.114759
3.525e-09	0.963952	0.985591	0.990276	0.980518	0.939043	0.0613427		3.525e-09	0.809901	2.02282	0.836988	0.393712	-1.07301
3.55e-09	0.977837	0.974887	0.994081	0.962824	0.951766	0.0419111		3.55e-09	1.75046	1.68982	1.34937	-2.93695	0.937645
3.575e-09	1	0.945245	0.974352	0.958892	0.928599	0.0297188		3.575e-09	3.25873	0.38776	-0.0384912	-1.20496	0.336258
3.6e-09	0.960481	0.946892	0.985344	0.96765	0.915116	0.0183647		3.6e-09	0.936992	0.679601	1.22353	-1.29187	0.504011
3.625e-09	0.948999	0.933718	0.970688	0.924039	0.877326	0.0138688		3.625e-09	0.386471	0.216326	0.341641	0.194533	-1.18455
3.65e-09	0.975434	0.953479	0.980271	0.951921	0.873338	0.00838223		3.65e-09	2.22717	1.42413	1.54173	-2.08697	-0.273228
3.675e-09	0.974099	0.934953	0.951663	0.90134	0.864033	0.00670578		3.675e-09	2.32067	0.659445	-0.524993	-1.646	0.235381
3.7e-09	0.904673	0.960066	0.969419	0.91403	0.841626	0.00472453		3.7e-09	-1.90312	2.12198	1.40827	-2.10671	-0.287123
3.725e-09	0.946595	0.955949	0.964769	0.86899	0.812571	0.00320049		3.725e-09	0.92009	2.07704	1.41155	-0.173226	-1.35911
3.75e-09	0.91749	0.930012	0.948563	0.885612	0.808963	0.00259087		3.75e-09	-0.760005	0.901006	0.414482	-1.42888	-0.43682
3.775e-09	0.959146	0.857555	0.931652	0.877391	0.793771	0.00175265		3.775e-09	2.04121	-2.69052	-0.653995	-0.654428	-0.479272
3.8e-09	0.925501	0.916838	0.952931	0.851296	0.789024	0.00137164		3.8e-09	0.0504727	0.521605	1.59016	-0.0989825	0.294783
3.825e-09	0.924166	0.884726	0.931229	0.85916	0.752564	0.00152404		3.825e-09	0.113631	-0.995226	0.0902297	-0.0647694	-1.58172
3.85e-09	0.916689	0.900371	0.932215	0.816979	0.757121	0.00114303		3.85e-09	-0.213334	-0.0428034	0.567333	-1.12213	-0.108552
3.875e-09	0.922296	0.909839	0.927283	0.8395	0.74022	0.000914425		3.875e-09	0.293634	0.587675	0.523617	-0.510957	-0.449031
3.9e-09	0.91215	0.910251	0.952508	0.819124	0.74136	0.000914425		3.9e-09	-0.208766	0.747163	3.13092	-1.07125	0.703235
3.925e-09	0.894526	0.924249	0.908963	0.78445	0.729016	0.000685819		3.925e-09	-1.19165	1.61658	-0.326208	-0.646664	0.703673
3.95e-09	0.891856	0.918485	0.906849	0.818588	0.710027	0.00152404		3.95e-09	-1.21721	1.45446	-0.127327	-0.947416	0.114679
3.975e-09	0.911348	0.88802	0.910795	0.801251	0.688188	0.000609617		3.975e-09	0.179542	-0.00277107	0.606666	0.711443	-0.744719
4e-09	0.902003	0.900782	0.914318	0.784629	0.697114	0.000457213		4e-09	-0.273992	0.794702	1.29987	0.240755	1.0571
4.025e-09	0.892123	0.87114	0.879791	0.769616	0.674516	0.000457213		4.025e-09	-0.767261	-0.632689	-1.4028	0.102994	0.0722539
4.05e-09	0.911081	0.867435	0.896139	0.746202	0.675465	0.000914425		4.05e-09	0.593617	-0.702264	0.417352	-0.161589	1.13005
4.075e-09	0.916155	0.876492	0.884019	0.76336	0.650399	0.000838223		4.075e-09	1.0613	-0.0993194	-0.301966	-1.16246	-0.175113
4.1e-09	0.90227	0.899547	0.871477	0.726184	0.640524	0.000762021		4.1e-09	0.304373	1.24089	-1.06047	-0.315726	-0.158531
4.125e-09	0.900401	0.862907	0.881483	0.741734	0.625142	0.000304808		4.125e-09	0.322484	-0.562153	0.195139	0.292178	-0.661704
4.15e-09	0.874232	0.845615	0.892052	0.746023	0.636916	0.000685819		4.15e-09	-1.23334	-1.34908	1.50908	-0.955581	1.30879
4.175e-09	0.881175	0.866612	0.852452	0.723324	0.623243	0.000457213		4.175e-09	-0.64829	-0.114914	-1.69737	-0.592915	0.935563
4.2e-09	0.868892	0.874846	0.862458	0.725827	0.607862	0.000152404		4.2e-09	-1.30987	0.445057	-0.439507	-0.234965	0.389985
4.225e-09	0.900668	0.916015	0.859921	0.72958	0.59305	0.000533415		4.225e-09	0.890909	2.75156	-0.31358	1.22867	-0.122889
4.25e-09	0.903872	0.830795	0.842587	0.694549	0.576149	0.00038101		4.25e-09	1.23684	-1.64568	-1.53312	0.492222	-0.868323
4.275e-09	0.877971	0.839028	0.851747	0.70849	0.601595	0.000152404		4.275e-09	-0.313151	-1.08736	-0.35268	-2.21729	2.39352
4.3e-09	0.893725	0.861671	0.849634	0.698302	0.561337	0.000304808		4.3e-09	0.849565	0.239233	-0.201503	-0.740758	-0.643574
4.325e-09	0.859546	0.854261	0.84611	0.676497	0.566274	0.00038101		4.325e-09	-1.24711	-0.0351655	-0.183001	-0.34102	0.635858
4.35e-09	0.878772	0.849732	0.847238	0.676676	0.549183	0.000457213		4.35e-09	0.139395	-0.156605	0.260431	-0.0379003	-0.246878
4.375e-09	0.891589	0.867023	0.840051	0.679893	0.531523	0.00038101		4.375e-09	1.109	0.883513	-0.0588699	0.00550056	-1.21793
4.4e-09	0.873431	0.809387	0.852593	0.670777	0.53779	0.000304808		4.4e-09	0.0526858	-2.08373	1.43717	-1.68295	0.157578
4.425e-09	0.892657	0.8662	0.850902	0.675961	0.535701	0.000152404		4.425e-09	1.44654	1.07553	1.62283	-0.969047	0.710248
4.45e-09	0.866756	0.821737	0.844701	0.659875	0.523357	0.000228606		4.45e-09	-0.121395	-1.19144	1.38713	-0.780722	0.226131
4.475e-09	0.853138	0.849732	0.824408	0.653441	0.533612	0.000457213		4.475e-09	-0.886948	0.427479	-0.156013	0.121855	2.01293
4.5e-09	0.849132	0.834911	0.84301	0.638248	0.525636	0.000304808		4.5e-09	-1.02304	-0.254309	1.90384	-1.06326	1.95354
4.525e-09	0.835514	0.874846	0.827227	0.622341	0.505507	0.000228606		4.525e-09	-1.79353	2.01062	0.766059	0.685202	0.628099
4.55e-09	0.877437	0.853849	0.823985	0.642002	0.50076	0.00038101		4.55e-09	1.09792	0.995076	0.793054	0.914136	0.854383
4.575e-09	0.860614	0.815974	0.81553	0.628597	0.498291	0.000152404		4.575e-09	0.113808	-0.936523	0.329249	-1.43376	1.29844
4.6e-09	0.811749	0.802388	0.815671	0.630384	0.491834	0.000152404		4.6e-09	-2.99009	-1.55979	0.663238	0.544749	1.31016
4.625e-09	0.853138	0.81515	0.814825	0.604468	0.46297	0.000228606		4.625e-09	-0.131691	-0.759961	0.893024	-0.0836415	-1.06096
4.65e-09	0.857143	0.839028	0.812852	0.606613	0.473224	0.00106683		4.65e-09	0.25312	0.64223	1.02461	-1.04789	0.678965
4.675e-09	0.848865	0.831206	0.826099	0.582663	0.460881	0.000609617		4.675e-09	-0.171484	0.328523	2.59447	-1.27811	0.0159146
4.7e-09	0.857677	0.769041	0.809893	0.593566	0.433916	0.000304808		4.7e-09	0.53484	-2.93841	1.38602	0.750684	-2.23734
4.725e-09	0.843792	0.827913	0.80341	0.598034	0.446449	0.000304808		4.725e-09	-0.267397	0.367706	1.08775	-3.06548	-0.2514
4.75e-09	0.82964	0.794566	0.790868	0.601787	0.44512	0.000533415		4.75e-09	-1.08896	-1.34018	0.215971	-1.17158	0.241628
4.775e-09	0.831242	0.813503	0.785231	0.596783	0.431827	0.000152404		4.775e-09	-0.860731	-0.201972	-0.00675407	0.0160855	-0.582163
4.8e-09	0.832577	0.829971	0.782272	0.581233	0.454615	0.000152404		4.8e-09	-0.649765	0.801798	0.0221547	-2.2789	2.55215
4.825e-09	0.852336	0.794977	0.75916	0.58034	0.412647	7.62021e-05		4.825e-09	0.789623	-1.00533	-1.87624	0.680949	-1.49131
4.85e-09	0.824833	0.77851	0.759724	0.587846	0.429738	0.000152404		4.85e-09	-0.92662	-1.80108	-1.51895	-1.94211	1.00623
4.875e-09	0.82777	0.806505	0.775507	0.571939	0.427839	7.62021e-05		4.875e-09	-0.610853	-0.164047	0.296387	-2.50996	1.38144
4.9e-09	0.81255	0.794154	0.794391	0.553172	0.402962	7.62021e-05		4.9e-09	-1.51058	-0.73728	2.41274	-0.856598	-0.848158
4.925e-09	0.828571	0.831618	0.757187	0.558356	0.397076	0.000304808		4.925e-09	-0.321734	1.42371	-0.859013	-0.0362377	-0.949475
4.95e-09	0.829907	0.810622	0.741826	0.571939	0.40771	7.62021e-05		4.95e-09	-0.116633	0.375016	-2.04689	-1.25164	0.835394
4.975e-09	0.851802	0.775628	0.740417	0.548168	0.413027	0.000609617		4.975e-09	1.46957	-1.44869	-1.89082	0.828732	2.01996
5e-09	0.835781	0.815974	0.767897	0.561573	0.405051	0.000457213		5e-09	0.50626	0.873314	1.06122	-0.361693	1.66301
5.025e-09	0.817356	0.803211	0.752678	0.538874	0.38891	0.000457213		5.025e-09	-0.618329	0.27243	-0.115024	-0.0759542	0.33807
5.05e-09	0.806943	0.81268	0.738867	0.535299	0.396316	7.62021e-05		5.05e-09	-1.20324	0.898678	-1.16365	-0.777384	1.74473
5.075e-09	0.818692	0.806916	0.741967	0.546381	0.382264	0.000152404		5.075e-09	-0.294335	0.682606	-0.573192	-1.0445	0.618151
5.1e-09	0.816822	0.76163	0.755073	0.523324	0.383403	0.000228606		5.1e-09	-0.303116	-1.72241	0.992768	1.71544	1.27952
5.125e-09	0.793057	0.794154	0.763811	0.527971	0.375617	0.00038101		5.125e-09	-1.79226	0.179219	2.14078	0.63033	0.874696
5.15e-09	0.813351	0.788802	0.749718	0.528329	0.366882	7.62021e-05		5.15e-09	-0.305261	-0.0169762	1.05304	0.198401	0.340566
5.175e-09	0.805874	0.783862	0.731398	0.515996	0.357007	0.000228606		5.175e-09	-0.697811	-0.190577	-0.452656	0.665854	-0.346712
5.2e-09	0.803471	0.764924	0.750705	0.539946	0.362894	0		5.2e-09	-0.747661	-1.14449	1.73079	-1.29233	0.870885
5.225e-09	0.810948	0.765336	0.736048	0.522073	0.354539	0.00038101		5.225e-09	-0.125946	-1.02374	0.577699	-0.70541	0.356841
5.25e-09	0.774366	0.759572	0.726607	0.518677	0.349791	7.62021e-05		5.25e-09	-2.49584	-1.24751	-0.0688813	-0.91532	0.271608
5.275e-09	0.801869	0.748044	0.72562	0.51403	0.344284	0.000152404		5.275e-09	-0.512799	-1.79432	0.116191	-1.30268	0.0811552
5.3e-09	0.781575	0.781392	0.718151	0.498123	0.350171	0.000152404		5.3e-09	-1.78132	0.164662	-0.342275	1.05739	1.29727
5.325e-09	0.820294	0.755043	0.718715	0.513315	0.337448	7.62021e-05		5.325e-09	0.968733	-1.21187	-0.00684539	0.0662744	0.184297
5.35e-09	0.80534	0.75669	0.71801	0.501162	0.347892	7.62021e-05		5.35e-09	0.0614177	-1.02403	0.200552	-0.367634	1.96262
5.375e-09	0.817356	0.75916	0.709414	0.484897	0.330801	0.000152404		5.375e-09	0.994271	-0.791301	-0.380612	-0.338975	0.262364
5.4e-09	0.806676	0.799918	0.718151	0.485076	0.3327	0.000228606		5.4e-09	0.376705	1.58967	0.768768	0.0442886	0.955191
5.425e-09	0.800267	0.776451	0.707159	0.477569	0.31523	0.000152404		5.425e-09	0.0504639	0.369132	-0.0529828	-0.270548	-0.824163
5.45e-09	0.781575	0.774804	0.708991	0.488829	0.313331	7.62021e-05		5.45e-09	-1.11761	0.373147	0.406331	-1.22076	-0.62385
5.475e-09	0.797063	0.792507	0.685316	0.483825	0.320927	0.000152404		5.475e-09	0.0554144	1.46614	-1.69592	0.201179	0.799032
5.5e-09	0.804005	0.755455	0.703072	0.469348	0.309153	7.62021e-05		5.5e-09	0.643658	-0.524936	0.364232	-1.01854	-0.283952
5.525e-09	0.790921	0.767806	0.721392	0.483467	0.321876	0		5.525e-09	-0.143786	0.266213	2.48665	-1.05261	1.81473
5.55e-09	0.769025	0.75175	0.700113	0.475603	0.304216	7.62021e-05		5.55e-09	-1.53964	-0.54597	0.610804	-0.00739166	-0.0689911
5.575e-09	0.767156	0.760807	0.687993	0.484004	0.308773	0		5.575e-09	-1.55989	0.059475	-0.34628	0.644137	0.952941
5.6e-09	0.781041	0.755867	0.696731	0.468811	0.300228	0		5.6e-09	-0.494764	-0.126582	0.808413	-0.221886	0.235945
5.625e-09	0.786115	0.763689	0.695885	0.482395	0.295101	0		5.625e-09	-0.0359362	0.40971	0.991829	2.5264	-0.0394843
5.65e-09	0.799199	0.761219	0.682497	0.450045	0.29567	0.000152404		5.65e-09	0.976708	0.362915	-0.102919	0.877435	0.441013
5.675e-09	0.775167	0.748456	0.687148	0.468811	0.299848	0		5.675e-09	-0.575064	-0.268847	0.63869	0.348761	1.40863
5.7e-09	0.777837	0.778921	0.667559	0.464343	0.278769	7.62021e-05		5.7e-09	-0.282335	1.55512	-1.09724	0.165782	-1.04214
5.725e-09	0.775434	0.747633	0.675028	0.456836	0.27687	0		5.725e-09	-0.34089	-0.131919	-0.0686682	-0.487224	-0.908684
5.75e-09	0.776502	0.727872	0.677988	0.444147	0.285226	7.62021e-05		5.75e-09	-0.159339	-1.16637	0.498688	-1.04551	0.624819
5.775e-09	0.76235	0.736105	0.684752	0.452726	0.285416	0		5.775e-09	-1.03448	-0.606927	1.45727	0.653863	1.04182
5.8e-09	0.79012	0.727872	0.653608	0.428954	0.271743	0.000152404		5.8e-09	1.00094	-0.987025	-1.48963	-1.25565	-0.464036
5.825e-09	0.775434	0.729518	0.682638	0.436104	0.267376	7.62021e-05		5.825e-09	0.0869579	-0.803693	1.76396	-0.987442	-0.699858
5.85e-09	0.775167	0.752161	0.663895	0.442895	0.27744	0		5.85e-09	0.174562	0.580903	0.0862537	0.731145	1.07073
5.875e-09	0.786649	0.752161	0.663472	0.446828	0.273452	0		5.875e-09	1.08071	0.671161	0.299955	-1.25018	0.879419
5.9e-09	0.743658	0.757102	0.654876	0.440929	0.257311	0		5.9e-09	-1.81153	1.04453	-0.335115	-0.935751	-1.03311
5.925e-09	0.771963	0.725813	0.662204	0.42681	0.264527	7.62021e-05		5.925e-09	0.268434	-0.661047	0.683289	-0.553239	0.342841
5.95e-09	0.764753	0.703993	0.662345	0.419482	0.281238	0.000228606		5.95e-09	-0.13003	-1.8265	0.955348	-0.579126	3.081
5.975e-09	0.769559	0.724578	0.661359	0.420912	0.257691	7.62021e-05		5.975e-09	0.311028	-0.555844	1.10918	-2.02385	0.0804061
6e-09	0.744459	0.706875	0.650789	0.432887	0.25978	7.62021e-05		6e-09	-1.34187	-1.48745	0.259048	1.86149	0.732137
6.025e-09	0.772764	0.73734	0.646702	0.436819	0.251044	7.62021e-05		6.025e-09	0.745087	0.354752	0.0830617	-0.481246	-0.180571
6.05e-09	0.760748	0.726225	0.643743	0.412154	0.248006	0		6.05e-09	0.00641841	-0.198771	0.022819	0.428166	-0.282706
6.075e-09	0.762617	0.731165	0.630214	0.403038	0.244018	0		6.075e-09	0.241047	0.173458	-1.15121	0.115695	-0.531762
6.1e-09	0.736983	0.716756	0.618799	0.414835	0.251044	0		6.1e-09	-1.45785	-0.572639	-2.10805	0.645334	0.823677
6.125e-09	0.764219	0.713462	0.632892	0.425559	0.263578	7.62021e-05		6.125e-09	0.560134	-0.677282	-0.376064	0.881277	2.99638
6.15e-09	0.735113	0.744751	0.640924	0.415192	0.243638	0		6.15e-09	-1.38691	1.22109	0.720519	0.145846	0.384713
6.175e-09	0.75247	0.699465	0.642052	0.410903	0.249525	0		6.175e-09	-0.0621193	-1.31785	1.08857	1.16099	1.58067
6.2e-09	0.748732	0.733224	0.629791	0.403217	0.234903	7.62021e-05		6.2e-09	-0.223795	0.726582	0.0355352	-1.89534	-0.274249
6.225e-09	0.716422	0.689172	0.626127	0.398391	0.229016	0		6.225e-09	-2.40445	-1.74697	-0.108378	-0.778091	-0.84046
6.25e-09	0.743124	0.729518	0.626409	0.398928	0.223889	0.000228606		6.25e-09	-0.416978	0.683629	0.165863	-0.567452	-1.30184
6.275e-09	0.755941	0.748868	0.626832	0.399285	0.22142	0		6.275e-09	0.591075	1.89607	0.454163	1.27146	-1.37128
6.3e-09	0.757276	0.688349	0.634019	0.401609	0.229396	0		6.3e-09	0.787124	-1.54511	1.46515	0.410645	0.137687
6.325e-09	0.755674	0.735694	0.617531	0.395353	0.219142	0		6.325e-09	0.774804	1.30021	-0.0584989	-1.23086	-1.12624
6.35e-09	0.728972	0.713051	0.626127	0.384629	0.223319	0		6.35e-09	-1.01953	0.0630112	1.10378	-1.73494	-0.196827
6.375e-09	0.755674	0.675587	0.616545	0.392315	0.22256	7.62021e-05		6.375e-09	0.976636	-2.04354	0.314432	0.0549589	-0.0233184
6.4e-09	0.738852	0.696995	0.614853	0.387131	0.22313	0		6.4e-09	-0.118912	-0.708991	0.371707	0.7175	0.353299
6.425e-09	0.729506	0.731988	0.617531	0.381769	0.225788	0		6.425e-09	-0.684578	1.42394	0.899985	-0.464168	1.05418
6.45e-09	0.737784	0.719638	0.616685	0.390527	0.214014	0		6.45e-09	0.00409428	0.784372	1.04834	-0.300019	-0.488945
6.475e-09	0.734312	0.706052	0.616404	0.38874	0.215724	0		6.475e-09	-0.144123	0.0706866	1.25698	-1.9367	0.0605404
6.5e-09	0.71749	0.651297	0.606116	0.369794	0.207558	0		6.5e-09	-1.24605	-3.06402	0.378936	-1.86736	-0.939844
6.525e-09	0.737517	0.690408	0.610908	0.369794	0.207748	7.62021e-05		6.525e-09	0.282405	-0.684113	1.13507	0.0435058	-0.636063
6.55e-09	0.71215	0.665294	0.615135	0.367828	0.216103	0.000152404		6.55e-09	-1.43319	-2.08134	1.83081	2.0495	0.957377
6.575e-09	0.739386	0.663648	0.575958	0.376586	0.206798	0		6.575e-09	0.613183	-2.09864	-2.20772	-0.000278857	-0.249435
6.6e-09	0.714019	0.702758	0.599775	0.366041	0.200722	0		6.6e-09	-1.1061	0.288273	0.622858	-0.0613895	-0.955641
6.625e-09	0.745794	0.67888	0.611612	0.365862	0.207178	0		6.625e-09	1.26931	-1.04015	2.15121	-0.196439	0.336923
6.65e-09	0.738318	0.690408	0.603016	0.371939	0.206608	0		6.65e-09	0.831164	-0.278508	1.44312	-1.50855	0.506241
6.675e-09	0.721228	0.686291	0.577931	0.368901	0.192366	7.62021e-05		6.675e-09	-0.298726	-0.441275	-1.07982	-0.453337	-1.53389
6.7e-09	0.733511	0.694936	0.577368	0.36908	0.20452	7.62021e-05		6.7e-09	0.681507	0.151314	-0.913529	-0.375153	0.687856
6.725e-09	0.712684	0.685056	0.582864	0.344057	0.200912	7.62021e-05		6.725e-09	-0.720237	-0.353607	-0.0796495	-0.60709	0.358891
6.75e-09	0.723899	0.683821	0.57159	0.361752	0.199202	0		6.75e-09	0.183845	-0.346797	-1.09688	-0.805144	0.334356
6.775e-09	0.732977	0.696995	0.584132	0.356926	0.193695	0.000228606		6.775e-09	0.93513	0.515618	0.516078	-0.54943	-0.317917
6.8e-09	0.700401	0.702347	0.58991	0.359607	0.202051	0.000152404		6.8e-09	-1.3196	0.91422	1.38326	0.254181	1.30286
6.825e-09	0.71749	0.675998	0.583005	0.364969	0.195025	0		6.825e-09	0.00965907	-0.573558	0.843691	-1.82035	0.388145
6.85e-09	0.719092	0.678469	0.567644	0.357283	0.191986	0		6.85e-09	0.220996	-0.347559	-0.639439	-0.101063	0.123953
6.875e-09	0.710814	0.67147	0.573281	0.336372	0.191227	0		6.875e-09	-0.28272	-0.686056	0.211439	1.01608	0.233843
6.9e-09	0.685714	0.678057	0.573281	0.360143	0.190657	7.62021e-05		6.9e-09	-2.00643	-0.214422	0.435405	1.14038	0.373566
6.925e-09	0.695594	0.667353	0.570462	0.359607	0.187998	0		6.925e-09	-1.19677	-0.775252	0.34435	-2.09994	0.161692
6.95e-09	0.718558	0.671881	0.575254	0.34513	0.177744	0.000152404		6.95e-09	0.563914	-0.426322	1.10472	0.86933	-1.33289
6.975e-09	0.723097	0.664059	0.55031	0.340304	0.192366	0		6.975e-09	0.988975	-0.816404	-1.47044	-0.883026	1.36447
7e-09	0.712684	0.664471	0.571731	0.33798	0.184011	0		7e-09	0.327087	-0.714149	1.15628	0.238388	0.180453
7.025e-09	0.706542	0.701112	0.542136	0.339946	0.183441	0		7.025e-09	-0.0254346	1.5611	-1.95465	1.00831	0.309647
7.05e-09	0.687583	0.679292	0.552283	0.358356	0.171477	7.62021e-05		7.05e-09	-1.31276	0.330328	-0.594592	-1.07689	-1.5117
7.075e-09	0.699599	0.672705	0.56863	0.332797	0.181542	0		7.075e-09	-0.344165	0.0123506	1.46969	-1.20819	0.427473
7.1e-09	0.714019	0.664471	0.563557	0.338159	0.179643	0		7.1e-09	0.801281	-0.405566	1.11524	-1.21038	0.317705
7.125e-09	0.681976	0.688761	0.55186	0.341912	0.167679	0		7.125e-09	-1.44557	1.13388	0.00771953	0.13805	-1.53402
7.15e-09	0.694526	0.682585	0.560034	0.331903	0.180403	0		7.15e-09	-0.436175	0.839894	1.15302	1.35905	0.877195
7.175e-09	0.728972	0.660354	0.552283	0.325112	0.174516	0.000152404		7.175e-09	2.17731	-0.423488	0.489588	0.793408	0.0670285
7.2e-09	0.684112	0.675175	0.548055	0.332082	0.170338	0		7.2e-09	-1.01386	0.547993	0.22472	0.848028	-0.452147
7.225e-09	0.699332	0.669	0.546223	0.332082	0.187239	0		7.225e-09	0.193845	0.251964	0.231425	0.0883011	2.71429
7.25e-09	0.684913	0.666118	0.551578	0.330474	0.174136	7.62021e-05		7.25e-09	-0.771622	0.154326	1.05888	0.00675166	0.628026
7.275e-09	0.698531	0.653767	0.552565	0.321001	0.167679	7.62021e-05		7.275e-09	0.320145	-0.517269	1.38706	-1.48235	-0.304112
7.3e-09	0.689987	0.64718	0.527057	0.323146	0.170148	0		7.3e-09	-0.215831	-0.841085	-1.32603	-0.543188	0.332524
7.325e-09	0.68518	0.653767	0.522548	0.321895	0.160273	0		7.325e-09	-0.478048	-0.366467	-1.63532	0.931656	-1.22117
7.35e-09	0.691055	0.650473	0.541009	0.328329	0.169009	0		7.35e-09	0.0456025	-0.491263	0.699047	-0.970282	0.525658
7.375e-09	0.696662	0.661177	0.539882	0.326005	0.169009	0.000152404		7.375e-09	0.550271	0.234398	0.780774	1.1383	0.720658
7.4e-09	0.668892	0.648003	0.542277	0.314567	0.159514	0		7.4e-09	-1.407	-0.491643	1.2694	0.608051	-0.787052
7.425e-09	0.700668	0.640181	0.525648	0.310813	0.162552	7.62021e-05		7.425e-09	1.02936	-0.893262	-0.443274	0.574548	-0.0523831
7.45e-09	0.692924	0.659942	0.527621	0.317784	0.158185	0		7.45e-09	0.548905	0.385691	-0.00533991	-0.749196	-0.65047
7.475e-09	0.659012	0.687937	0.524803	0.315103	0.1673	0		7.475e-09	-1.86855	2.16924	-0.123507	0.582041	1.18629
7.5e-09	0.70227	0.640593	0.527339	0.303485	0.163502	0		7.5e-09	1.42346	-0.645586	0.379738	-0.323801	0.687966
7.525e-09	0.691856	0.64471	0.540445	0.308132	0.163122	0.000152404		7.525e-09	0.743304	-0.320011	2.1152	0.739446	0.806127
7.55e-09	0.662483	0.626595	0.519729	0.304021	0.155146	0		7.55e-09	-1.34475	-1.35447	-0.0937262	1.51412	-0.466388
7.575e-09	0.700401	0.661177	0.529171	0.312422	0.154007	0		7.575e-09	1.55902	0.836387	1.21584	-0.701431	-0.496994
7.6e-09	0.673698	0.634006	0.530299	0.300626	0.14774	7.62021e-05		7.6e-09	-0.334215	-0.754674	1.55492	0.304084	-1.47339
7.625e-09	0.669159	0.631124	0.512401	0.311349	0.149639	0		7.625e-09	-0.582649	-0.85843	-0.338081	-0.871378	-0.952023
7.65e-09	0.674499	0.627007	0.520152	0.305094	0.158185	0.000152404		7.65e-09	-0.0962284	-1.0384	0.776923	0.370097	0.800365
7.675e-09	0.693458	0.626184	0.519448	0.306881	0.164641	0		7.675e-09	1.40557	-1.01637	0.899583	0.0500118	2.17443
7.7e-09	0.66008	0.632771	0.516911	0.316533	0.153437	7.62021e-05		7.7e-09	-0.993101	-0.538492	0.805911	-0.0562252	0.268407
7.725e-09	0.664619	0.64224	0.498873	0.286148	0.160843	0		7.725e-09	-0.566067	0.117555	-1.12052	-0.53683	1.82384
7.75e-09	0.669159	0.631947	0.508455	0.317248	0.154197	0		7.75e-09	-0.138552	-0.443679	0.21416	-2.33867	0.755214
7.775e-09	0.67984	0.64965	0.504932	0.299017	0.157235	0		7.775e-09	0.748609	0.721166	-0.00168211	-1.84218	1.49661
7.8e-09	0.670494	0.644298	0.496759	0.288293	0.151158	0		7.8e-09	0.138215	0.46398	-0.771737	-1.20717	0.522301
7.825e-09	0.658478	0.626595	0.50916	0.298481	0.142613	0.000152404		7.825e-09	-0.673587	-0.557441	0.901823	-2.27271	-0.927054
7.85e-09	0.664887	0.622478	0.511556	0.298481	0.150779	0		7.85e-09	-0.105779	-0.740332	1.38808	-1.04421	0.779136
7.875e-09	0.676903	0.619185	0.489572	0.296872	0.140334	0		7.875e-09	0.883581	-0.872742	-1.03417	-0.189463	-1.04331
7.9e-09	0.668892	0.606011	0.514515	0.306524	0.140144	7.62021e-05		7.9e-09	0.370452	-1.61804	2.14477	-0.72475	-0.923556
7.925e-09	0.651802	0.634006	0.497322	0.291332	0.14755	0		7.925e-09	-0.826168	0.189558	0.288426	0.530875	0.647414
7.95e-09	0.647797	0.615068	0.48929	0.292404	0.151918	7.62021e-05		7.95e-09	-1.04066	-0.914371	-0.476099	0.213384	1.64394
7.975e-09	0.658745	0.609716	0.489853	0.292225	0.14831	0		7.975e-09	-0.129739	-1.17603	-0.211305	-0.145994	1.11185
8e-09	0.640587	0.606011	0.493095	0.298302	0.146601	7.62021e-05		8e-09	-1.41107	-1.33598	0.375416	-0.0869896	0.941054
8.025e-09	0.66729	0.613009	0.504791	0.290795	0.141664	0		8.025e-09	0.688951	-0.829906	1.98204	-2.05625	0.142957
8.05e-09	0.640854	0.633182	0.497322	0.271135	0.140524	0.000152404		8.05e-09	-1.21951	0.49798	1.27865	0.87198	0.0740235
8.075e-09	0.65474	0.611774	0.486894	0.294549	0.132928	0		8.075e-09	-0.0848018	-0.766111	0.214014	0.324722	-1.25281
8.1e-09	0.657677	0.604364	0.502255	0.293298	0.146981	0		8.1e-09	0.223635	-1.15863	2.26925	-1.35554	1.63038
8.125e-09	0.665688	0.62042	0.475197	0.279357	0.125142	0		8.125e-09	0.916448	-0.0853363	-0.816473	-0.374458	-2.48694
8.15e-09	0.648865	0.617538	0.47872	0.288651	0.135587	0		8.15e-09	-0.271114	-0.194951	-0.195978	0.973893	-0.301635
8.175e-09	0.639519	0.606011	0.482384	0.275603	0.134447	7.62021e-05		8.175e-09	-0.893942	-0.846244	0.443276	1.77878	-0.381743
8.2e-09	0.644059	0.594895	0.476747	0.284004	0.139954	0		8.2e-09	-0.464189	-1.47307	-0.0501905	-0.0353801	0.84626
8.225e-09	0.649132	0.582133	0.475902	0.279357	0.127041	0.000152404		8.225e-09	0.00669228	-2.20453	0.0391131	-0.228128	-1.55913
8.25e-09	0.609613	0.636476	0.474493	0.27328	0.137296	0		8.25e-09	-2.9121	1.2758	0.0586135	-0.239	0.61012
8.275e-09	0.656342	0.601482	0.478579	0.282038	0.133118	0		8.275e-09	0.726602	-0.852108	0.7505	-0.496302	-0.0773726
8.3e-09	0.633111	0.59119	0.483371	0.273101	0.137486	7.62021e-05		8.3e-09	-0.956754	-1.43039	1.53001	-0.141915	0.93084
8.325e-09	0.648064	0.621243	0.473224	0.273637	0.13046	7.62021e-05		8.325e-09	0.267263	0.530117	0.474398	2.95942	-0.332589
8.35e-09	0.642991	0.619597	0.467165	0.262556	0.135397	0.000152404		8.35e-09	-0.03469	0.496407	-0.0820906	0.731342	0.790066
8.375e-09	0.632043	0.614656	0.469701	0.283825	0.135397	0.000152404		8.375e-09	-0.785913	0.254752	0.419488	-0.00362204	0.926151
8.4e-09	0.63231	0.604776	0.455609	0.275961	0.131409	7.62021e-05		8.4e-09	-0.681517	-0.29934	-1.13245	-0.886014	0.259442
8.425e-09	0.632844	0.605187	0.457441	0.262556	0.134637	7.62021e-05		8.425e-09	-0.556646	-0.204236	-0.719033	-1.04949	1.04375
8.45e-09	0.664085	0.610128	0.470829	0.277927	0.122484	0		8.45e-09	1.9191	0.177296	1.12773	-1.00725	-1.27889
8.475e-09	0.626168	0.611774	0.462232	0.270956	0.130839	0		8.475e-09	-0.900032	0.350855	0.249912	-0.178369	0.543009
8.5e-09	0.620561	0.59119	0.467587	0.273816	0.126662	7.62021e-05		8.5e-09	-1.24655	-0.883991	1.10336	-1.13201	-0.174145
8.525e-09	0.651535	0.613833	0.44969	0.268811	0.127611	0		8.525e-09	1.21381	0.619858	-0.938363	-0.967683	0.14788
8.55e-09	0.629105	0.575545	0.483089	0.27185	0.12894	0		8.55e-09	-0.42436	-1.74106	3.41301	-1.80345	0.547068
8.575e-09	0.635247	0.624537	0.461528	0.26613	0.118306	0		8.575e-09	0.131077	1.43806	0.908433	0.151633	-1.50294
8.6e-09	0.635514	0.5986	0.453354	0.268454	0.123623	0		8.6e-09	0.235191	-0.141461	0.070988	-1.75272	-0.291087
8.625e-09	0.602403	0.581721	0.454904	0.263092	0.119825	7.62021e-05		8.625e-09	-2.23134	-1.14755	0.44956	-0.818063	-0.949823
8.65e-09	0.619493	0.605599	0.452086	0.25487	0.118116	0		8.65e-09	-0.832691	0.440548	0.280265	0.182101	-1.18206
8.675e-09	0.636849	0.599835	0.437289	0.267739	0.113938	0		8.675e-09	0.588827	0.141605	-1.39689	1.71021	-1.9265
8.7e-09	0.6251	0.608069	0.451099	0.26345	0.12989	0		8.7e-09	-0.234707	0.735181	0.524622	-0.0174822	1.4953
8.725e-09	0.636849	0.592837	0.450958	0.266667	0.123433	0		8.725e-09	0.756111	-0.169097	0.690795	-1.47775	0.278861
8.75e-09	0.615487	0.580486	0.444335	0.269526	0.126472	7.62021e-05		8.75e-09	-0.812614	-0.890995	0.0369918	-0.790859	1.03205
8.775e-09	0.63498	0.594483	0.439825	0.259339	0.118496	0		8.775e-09	0.77835	0.0713668	-0.352411	-0.123853	-0.510998
8.8e-09	0.610948	0.602305	0.442221	0.257194	0.119825	0		8.8e-09	-1.0005	0.639741	0.131631	-0.302921	-0.116896
8.825e-09	0.638184	0.613833	0.431511	0.252368	0.115268	7.62021e-05		8.825e-09	1.19294	1.4464	-1.04845	-0.420028	-0.956739
8.85e-09	0.611749	0.571017	0.450254	0.245576	0.116027	0		8.85e-09	-0.775594	-1.2319	1.51439	0.779133	-0.68474
8.875e-09	0.589586	0.605187	0.433766	0.249866	0.123433	0		8.875e-09	-2.41579	1.02809	-0.404769	-0.189621	0.986933
8.9e-09	0.603738	0.586249	0.443771	0.253977	0.126472	0		8.9e-09	-1.23569	-0.121056	1.05122	0.138487	1.74337
8.925e-09	0.630174	0.582133	0.453777	0.2563	0.116407	7.62021e-05		8.925e-09	0.90203	-0.31903	2.51151	0.445901	-0.269295
8.95e-09	0.623498	0.575134	0.432638	0.25487	0.120015	0		8.95e-09	0.464762	-0.703011	-0.0121974	0.646946	0.607093
8.975e-09	0.621629	0.578016	0.436443	0.25076	0.122674	0		8.975e-09	0.401202	-0.451171	0.654497	-1.2092	1.28492
9e-09	0.589853	0.57431	0.431652	0.254513	0.119825	0.000152404		9e-09	-1.99562	-0.623922	0.217987	-0.217375	0.791928
9.025e-09	0.639519	0.583779	0.441234	0.244683	0.117926	0		9.025e-09	1.96167	0.0531748	1.62859	0.153195	0.498007
9.05e-09	0.626435	0.576781	0.428692	0.252547	0.117547	0.000152404		9.05e-09	1.0221	-0.33269	0.191205	-0.57453	0.526178
9.075e-09	0.599466	0.577604	0.425451	0.252726	0.120775	0		9.075e-09	-1.00521	-0.213628	-0.0509788	-0.744769	1.32641
9.1e-09	0.641656	0.561136	0.430524	0.241287	0.1109	0.000152404		9.1e-09	2.377	-1.21361	0.780429	0.74754	-0.686234
9.125e-09	0.611482	0.60107	0.426719	0.242181	0.0996962	7.62021e-05		9.125e-09	0.0960068	1.43808	0.464281	-1.00271	-2.99481
9.15e-09	0.616555	0.571429	0.422351	0.245934	0.116597	0		9.15e-09	0.574515	-0.416592	0.073623	-0.0274025	0.749744
9.175e-09	0.608812	0.587485	0.43292	0.23664	0.113369	7.62021e-05		9.175e-09	0.0479625	0.690763	1.62199	-0.678085	0.157357
9.2e-09	0.620294	0.580897	0.421646	0.257015	0.11166	7.62021e-05		9.2e-09	1.03031	0.329316	0.332515	0.648237	-0.108967
9.225e-09	0.612016	0.578427	0.42376	0.231099	0.113179	7.62021e-05		9.225e-09	0.460994	0.234695	0.783022	-0.549162	0.323895
9.25e-09	0.595461	0.5669	0.425028	0.235031	0.119256	7.62021e-05		9.25e-09	-0.760692	-0.449587	1.12364	-0.485391	1.74939
9.275e-09	0.587183	0.602305	0.412627	0.236104	0.107292	0		9.275e-09	-1.33295	1.92094	-0.322973	-0.225615	-0.754126
9.3e-09	0.603471	0.578016	0.406849	0.2395	0.108621	0		9.3e-09	0.0293825	0.404672	-0.907783	1.58874	-0.364881
9.325e-09	0.603738	0.559901	0.421646	0.212154	0.105203	0		9.325e-09	0.130199	-0.711603	1.20342	-1.11025	-1.01486
9.35e-09	0.621095	0.547962	0.408117	0.233423	0.107482	0		9.35e-09	1.5799	-1.4268	-0.400473	-0.78708	-0.418723
9.375e-09	0.604806	0.528613	0.400366	0.243432	0.110141	0		9.375e-09	0.373949	-2.62761	-1.24968	0.702828	0.262393
9.4e-09	0.59733	0.563195	0.406003	0.228776	0.105773	0		9.4e-09	-0.137452	-0.303291	-0.337586	1.64609	-0.602339
9.425e-09	0.612016	0.553314	0.409386	0.238427	0.105393	0		9.425e-09	1.10397	-0.885583	0.27941	-0.785841	-0.590864
9.45e-09	0.606142	0.595718	0.411218	0.23807	0.100076	7.62021e-05		9.45e-09	0.718987	1.9566	0.692944	0.400553	-1.67194
9.475e-09	0.591722	0.566077	0.416573	0.231814	0.109001	0		9.475e-09	-0.344092	0.0791457	1.57361	0.815083	0.398637
9.5e-09	0.593858	0.571429	0.395716	0.234316	0.100456	7.62021e-05		9.5e-09	-0.0958026	0.494942	-1.02027	-0.100924	-1.40312
9.525e-09	0.585047	0.547139	0.389656	0.224486	0.114128	0		9.525e-09	-0.716589	-1.03591	-1.65777	-0.17638	1.73084
9.55e-09	0.587717	0.576369	0.401353	0.231457	0.105393	7.62021e-05		9.55e-09	-0.426276	0.949101	0.0642472	-0.809516	-0.120109
9.575e-09	0.608278	0.554138	0.396843	0.222878	0.104823	0.000152404		9.575e-09	1.28711	-0.448969	-0.368669	-0.353162	-0.155369
9.6e-09	0.594393	0.555373	0.405017	0.225916	0.107482	0		9.6e-09	0.261391	-0.304109	0.88924	0.170917	0.530766
9.625e-09	0.601335	0.567312	0.402762	0.221269	0.0996962	0		9.625e-09	0.892992	0.546457	0.756627	-0.645918	-1.12357
9.65e-09	0.609613	0.557843	0.395293	0.231278	0.100266	0		9.65e-09	1.63197	-0.0139839	-0.074875	0.841669	-0.907519
9.675e-09	0.603471	0.541787	0.401212	0.242181	0.103494	0		9.675e-09	1.22148	-1.01044	0.885937	-0.830247	-0.0926508
9.7e-09	0.588518	0.549197	0.381764	0.217516	0.108431	0		9.7e-09	0.106481	-0.457875	-1.55766	-0.552554	1.11038
9.725e-09	0.573565	0.56196	0.40403	0.222699	0.101405	0		9.725e-09	-1.01053	0.449516	1.60178	0.130786	-0.386113
9.75e-09	0.589586	0.568958	0.387824	0.230027	0.1109	0		9.75e-09	0.348212	0.976708	-0.413248	0.702925	1.85161
9.775e-09	0.594393	0.574722	0.384301	0.226631	0.102545	0		9.775e-09	0.811082	1.42276	-0.724038	-0.688836	0.0475756
9.8e-09	0.578905	0.548374	0.391911	0.214656	0.0991265	0.000152404		9.8e-09	-0.351625	-0.260215	0.468021	1.57863	-0.642246
9.825e-09	0.589052	0.565665	0.379791	0.229848	0.0892518	0		9.825e-09	0.539213	0.950267	-1.00768	1.08831	-2.8058
9.85e-09	0.606943	0.558254	0.381483	0.214656	0.11109	0		9.85e-09	2.05284	0.521724	-0.616118	1.07227	2.25584
9.875e-09	0.579706	0.562371	0.389938	0.221269	0.0915306	7.62021e-05		9.875e-09	-0.0560746	0.858762	0.694792	2.76036	-2.12531
9.9e-09	0.582911	0.541787	0.395575	0.216979	0.0945689	0		9.9e-09	0.278616	-0.4475	1.62614	-1.53411	-1.34936
9.925e-09	0.583712	0.545492	0.381623	0.217337	0.11166	0		9.925e-09	0.420397	-0.138323	-0.108257	-0.438442	2.65212
9.95e-09	0.568758	0.560313	0.388247	0.217516	0.0966578	0.000152404		9.95e-09	-0.706335	0.912255	0.958552	-0.34453	-0.706618
9.975e-09	0.577036	0.563606	0.398534	0.220375	0.0993164	0		9.975e-09	0.0371813	1.19542	2.52873	-0.75403	-0.0125744
1e-08	0.595194	0.555373	0.382892	0.219303	0.102545	0		1e-08	1.57864	0.709133	0.554173	-0.478106	0.814729
1.0025e-08	0.555941	0.543845	0.392193	0.202681	0.101405	0		1.0025e-08	-1.51209	0.00168961	1.99162	-0.110323	0.635073
1.005e-08	0.549533	0.561548	0.374014	0.207507	0.0977972	0		1.005e-08	-1.95462	1.24802	-0.340009	-0.983442	-0.117586
1.0075e-08	0.584246	0.549609	0.370631	0.210545	0.0957083	0		1.0075e-08	0.926961	0.511886	-0.645005	-0.202578	-0.521641
1.01e-08	0.581575	0.539728	0.379932	0.217158	0.0993164	0		1.01e-08	0.787825	-0.0877287	0.795158	-1.21844	0.395243
1.0125e-08	0.575968	0.5352	0.3719	0.214656	0.0903912	7.62021e-05		1.0125e-08	0.410415	-0.329572	-0.151428	1.06447	-1.60146
1.015e-08	0.581308	0.534788	0.375564	0.224129	0.0976073	0		1.015e-08	0.919697	-0.295602	0.514533	0.856035	0.156502
1.0175e-08	0.576502	0.516262	0.361894	0.222341	0.0953285	7.62021e-05		1.0175e-08	0.606545	-1.47851	-1.21602	-1.786	-0.296711
1.02e-08	0.566622	0.52079	0.356116	0.218767	0.0934295	0.000152404		1.02e-08	-0.119152	-1.1135	-1.85881	-0.724025	-0.663038
1.0225e-08	0.57036	0.506793	0.375423	0.21269	0.088872	7.62021e-05		1.0225e-08	0.260424	-1.99464	0.977261	-0.0542071	-1.65394
1.025e-08	0.564486	0.521614	0.372182	0.210366	0.0968477	7.62021e-05		1.025e-08	-0.141342	-0.936602	0.687051	-0.732993	0.292698
1.0275e-08	0.593057	0.536846	0.370209	0.205362	0.0917205	7.62021e-05		1.0275e-08	2.25967	0.150795	0.571613	-0.715262	-0.835246
1.03e-08	0.566088	0.533553	0.389233	0.211081	0.0972275	0		1.03e-08	0.140023	-0.00997725	3.38283	-1.67905	0.536474
1.0325e-08	0.561816	0.507205	0.367672	0.205004	0.100646	0		1.0325e-08	-0.132911	-1.72786	0.5341	0.627677	1.41923
1.035e-08	0.535915	0.538493	0.353157	0.217873	0.0873528	7.62021e-05		1.035e-08	-2.17124	0.446168	-1.33844	0.317445	-1.64455
1.0375e-08	0.572497	0.509263	0.364853	0.210009	0.0951386	0.000152404		1.0375e-08	0.889339	-1.46941	0.454704	0.521881	0.269929
1.04e-08	0.541255	0.517497	0.351184	0.2084	0.0985568	7.62021e-05		1.04e-08	-1.58821	-0.852301	-1.30584	1.14953	1.15482
1.0425e-08	0.550334	0.532318	0.372041	0.201072	0.100076	0		1.0425e-08	-0.77195	0.212045	1.77943	-0.00981805	1.59131
1.045e-08	0.557543	0.502676	0.354989	0.209294	0.0983669	0		1.045e-08	-0.107462	-1.73681	-0.461251	-0.0888126	1.261
1.0475e-08	0.558879	0.529848	0.354425	0.209115	0.0884922	0		1.0475e-08	0.0766949	0.16655	-0.385421	-1.56138	-1.01639
1.05e-08	0.560748	0.523261	0.355834	0.215192	0.0949487	7.62021e-05		1.05e-08	0.304758	-0.220023	-0.0316224	0.838766	0.595791
1.0525e-08	0.565821	0.529436	0.360344	0.20429	0.096278	0		1.0525e-08	0.795916	0.260146	0.760752	0.45112	0.986906
1.055e-08	0.561282	0.511322	0.348224	0.216086	0.0970376	0		1.055e-08	0.498152	-0.911685	-0.800025	2.78922	1.24209
1.0575e-08	0.546328	0.501853	0.356116	0.201787	0.0913407	7.62021e-05		1.0575e-08	-0.656289	-1.49694	0.471808	-0.829017	-0.0511392
1.06e-08	0.55514	0.533965	0.350479	0.2	0.0835549	0		1.06e-08	0.142182	0.750523	-0.17461	-1.58012	-1.85099
1.0625e-08	0.547664	0.542198	0.353157	0.201787	0.0892518	0		1.0625e-08	-0.3992	1.37295	0.35942	0.835378	-0.413217
1.065e-08	0.551402	0.533965	0.354143	0.198034	0.0835549	7.62021e-05		1.065e-08	-0.017502	0.872121	0.653843	0.250742	-1.71699
1.0675e-08	0.559947	0.517909	0.345124	0.200894	0.094379	0		1.0675e-08	0.761078	-0.164085	-0.478918	-1.33999	0.96238
1.07e-08	0.53725	0.526554	0.349634	0.184093	0.0922902	7.62021e-05		1.07e-08	-1.03756	0.48703	0.317925	1.30166	0.528261
1.0725e-08	0.543391	0.533553	0.349352	0.199464	0.086973	0		1.0725e-08	-0.457271	1.02641	0.430801	0.953816	-0.689248
1.075e-08	0.557276	0.523672	0.344983	0.197676	0.0898215	7.62021e-05		1.075e-08	0.763917	0.410308	-0.0426204	0.532286	0.0692111
1.0775e-08	0.543925	0.510086	0.340755	0.202681	0.0909609	7.62021e-05		1.0775e-08	-0.266449	-0.46104	-0.498104	-1.79145	0.414311
1.08e-08	0.551669	0.480445	0.347097	0.189455	0.0902013	7.62021e-05		1.08e-08	0.447917	-2.4357	0.564077	-0.413248	0.297803
1.0825e-08	0.545527	0.540963	0.339628	0.198928	0.090771	0		1.0825e-08	0.0126172	1.77763	-0.360095	-1.08231	0.504125
1.085e-08	0.550334	0.523261	0.360062	0.201787	0.0922902	7.62021e-05		1.085e-08	0.484389	0.621797	2.73705	0.444944	0.942178
1.0875e-08	0.534846	0.503499	0.337937	0.203932	0.0856438	0		1.0875e-08	-0.727603	-0.677675	-0.304688	0.742157	-0.614623
1.09e-08	0.552737	0.517085	0.338782	0.187131	0.0900114	0		1.09e-08	0.830959	0.316355	-0.0326792	-0.94764	0.519419
1.0925e-08	0.526035	0.510498	0.340192	0.192315	0.0846943	0		1.0925e-08	-1.31527	-0.0779887	0.321547	-0.846508	-0.717613
1.095e-08	0.530841	0.520379	0.33836	0.195889	0.0865932	0		1.095e-08	-0.84347	0.662531	0.206091	1.29697	-0.186949
1.0975e-08	0.565554	0.522437	0.344138	0.199106	0.0845044	7.62021e-05		1.0975e-08	2.11928	0.864295	1.19576	0.110632	-0.63558
1.1e-08	0.544993	0.490325	0.336387	0.201787	0.0846943	7.62021e-05		1.1e-08	0.480296	-1.29414	0.218396	-0.933564	-0.524792
1.1025e-08	0.539119	0.496089	0.343856	0.188025	0.0873528	7.62021e-05		1.1025e-08	0.0633461	-0.837875	1.45609	0.802875	0.194661
1.105e-08	0.542857	0.493619	0.335259	0.187131	0.0924801	0.000152404		1.105e-08	0.447899	-0.950739	0.351093	-1.63927	1.52544
1.1075e-08	0.539653	0.517085	0.328072	0.18731	0.0890619	0		1.1075e-08	0.25289	0.732157	-0.551812	0.124519	0.745575
1.11e-08	0.519626	0.514615	0.333145	0.186238	0.0939992	7.62021e-05		1.11e-08	-1.34907	0.620132	0.337629	-0.0944276	2.03291
1.1125e-08	0.53004	0.498147	0.328213	0.187846	0.0936194	0		1.1125e-08	-0.406655	-0.463128	-0.238171	-0.28991	2.00433
1.115e-08	0.529506	0.517497	0.323281	0.190349	0.0831751	0		1.115e-08	-0.379622	0.938276	-0.81601	1.63036	-0.525533
1.1175e-08	0.526569	0.495266	0.325395	0.19017	0.077858	7.62021e-05		1.1175e-08	-0.554042	-0.547158	-0.35924	-0.856175	-1.78722
1.12e-08	0.532176	0.51338	0.322576	0.188025	0.0845044	0		1.12e-08	-0.0121348	0.770465	-0.62822	-0.955854	-0.0714233
1.1225e-08	0.520961	0.498147	0.319053	0.185702	0.0816559	0		1.1225e-08	-0.881617	-0.23071	-1.00255	-0.95729	-0.720547
1.125e-08	0.510547	0.50844	0.328354	0.177301	0.0797569	0		1.125e-08	-1.68537	0.544235	0.516602	1.2447	-1.13463
1.1275e-08	0.546328	0.523672	0.328072	0.180161	0.0902013	0		1.1275e-08	1.3934	1.6647	0.62113	0.00540293	1.53916
1.13e-08	0.532443	0.489914	0.326945	0.182306	0.0827953	0		1.13e-08	0.297664	-0.631364	0.599892	0.127767	-0.254351
1.1325e-08	0.535648	0.519555	0.322717	0.193387	0.0820357	7.62021e-05		1.1325e-08	0.639139	1.49585	0.117684	-0.496434	-0.385174
1.135e-08	0.51215	0.47921	0.329763	0.176408	0.0860235	7.62021e-05		1.135e-08	-1.26951	-1.26481	1.30989	-2.6179	0.67656
1.1375e-08	0.535113	0.488678	0.314402	0.182842	0.0799468	0		1.1375e-08	0.737673	-0.545818	-0.83142	-1.07832	-0.79273
1.14e-08	0.524166	0.498971	0.313698	0.182306	0.0839347	0		1.14e-08	-0.114756	0.231929	-0.793649	0.115743	0.270732
1.1425e-08	0.535113	0.505558	0.310457	0.178374	0.072161	0		1.1425e-08	0.881225	0.751298	-1.13493	0.612398	-2.64207
1.145e-08	0.542857	0.512145	0.316939	0.182127	0.0884922	7.62021e-05		1.145e-08	1.60779	1.27144	-0.0229997	0.408475	1.54185
1.1475e-08	0.505741	0.494442	0.310175	0.181055	0.0816559	7.62021e-05		1.1475e-08	-1.46065	0.0877012	-0.892885	0.0780761	-0.127901
1.15e-08	0.516689	0.496912	0.313839	0.18034	0.0886821	0		1.15e-08	-0.463729	0.318718	-0.20135	-1.2846	1.71177
1.1525e-08	0.522029	0.464389	0.307215	0.194102	0.0835549	7.62021e-05		1.1525e-08	0.0593261	-1.90996	-1.05443	-0.813947	0.470635
1.155e-08	0.529773	0.505558	0.322999	0.181769	0.0807064	0		1.155e-08	0.786855	1.04205	1.46146	-0.216456	-0.195158
1.1575e-08	0.530307	0.462742	0.30482	0.175156	0.0846943	0.000152404		1.1575e-08	0.903319	-1.91474	-1.13474	0.836802	0.877108
1.16e-08	0.515354	0.499794	0.312289	0.179625	0.0820357	7.62021e-05		1.16e-08	-0.295982	0.75177	0.132454	0.0210373	0.257481
1.1625e-08	0.534579	0.499794	0.303129	0.183378	0.0788074	0		1.1625e-08	1.40881	0.809363	-1.11085	-0.848249	-0.509649
1.165e-08	0.516956	0.495266	0.313839	0.178195	0.0761489	0.000228606		1.165e-08	-0.0194547	0.547315	0.650334	-0.959396	-1.13353
1.1675e-08	0.533778	0.499382	0.309752	0.17748	0.0799468	0		1.1675e-08	1.48343	0.895523	0.172805	0.554912	-0.106583
1.17e-08	0.506275	0.463977	0.315107	0.181948	0.0769085	7.62021e-05		1.17e-08	-0.789288	-1.55014	1.12737	1.00483	-0.829395
1.1725e-08	0.506008	0.498147	0.307215	0.171939	0.0770984	7.62021e-05		1.1725e-08	-0.742529	0.923342	0.0695288	-0.710317	-0.725767
1.175e-08	0.529773	0.505558	0.318067	0.169973	0.0736802	0		1.175e-08	1.35569	1.50561	1.86278	0.554946	-1.54955
1.1775e-08	0.49239	0.49403	0.317785	0.177837	0.0801367	0		1.1775e-08	-1.76715	0.746384	1.96232	-1.3716	0.165566
1.18e-08	0.509746	0.503911	0.290868	0.171939	0.0797569	7.62021e-05		1.18e-08	-0.214756	1.50435	-2.00777	0.483985	0.122943
1.1825e-08	0.521228	0.482915	0.303692	0.184808	0.0822256	0.000152404		1.1825e-08	0.837232	0.071307	0.0903066	0.165418	0.814847
1.185e-08	0.522563	0.472211	0.293828	0.174084	0.0797569	0.000152404		1.185e-08	1.02177	-0.632911	-1.28253	0.872385	0.232307
1.1875e-08	0.490521	0.470564	0.299605	0.172833	0.0748196	0		1.1875e-08	-1.65424	-0.694301	-0.259209	-0.321689	-0.990902
1.19e-08	0.515087	0.512557	0.317644	0.173727	0.0746297	7.62021e-05		1.19e-08	0.521029	2.34998	2.65129	1.21	-0.987547
1.1925e-08	0.512684	0.484973	0.306229	0.168186	0.0748196	7.62021e-05		1.1925e-08	0.384544	0.443354	1.03664	-0.529265	-0.885849
1.195e-08	0.509479	0.474681	0.300874	0.161394	0.0782378	0		1.195e-08	0.178936	-0.233853	0.350951	-0.104404	0.0545981
1.1975e-08	0.523097	0.482915	0.303551	0.177301	0.0719711	0.000152404		1.1975e-08	1.41928	0.409491	0.902848	1.38194	-1.52197
1.2e-08	0.486782	0.466035	0.291714	0.166756	0.0799468	7.62021e-05		1.2e-08	-1.63524	-0.73948	-0.788603	1.13662	0.606749
1.2025e-08	0.513218	0.466859	0.297351	0.171582	0.0719711	0		1.2025e-08	0.70905	-0.625394	0.220118	0.578647	-1.41966
1.205e-08	0.512951	0.458625	0.299183	0.168722	0.0714014	0		1.205e-08	0.755522	-1.15908	0.6411	1.08367	-1.51768
1.2075e-08	0.503605	0.480856	0.292277	0.169258	0.075959	0.000152404		1.2075e-08	0.0188096	0.486961	-0.294235	1.69369	-0.275638
1.21e-08	0.499599	0.480445	0.285372	0.175335	0.0731105	0		1.21e-08	-0.258227	0.513435	-1.23279	1.02811	-0.969857
1.2125e-08	0.510814	0.471387	0.301719	0.175871	0.0808963	7.62021e-05		1.2125e-08	0.779056	-0.0800122	1.44771	1.29971	1.12178
1.215e-08	0.503605	0.483326	0.278326	0.164075	0.0731105	0		1.215e-08	0.224935	0.832135	-2.0639	0.395674	-0.869027
1.2175e-08	0.487316	0.48168	0.29425	0.171224	0.0738701	0.000152404		1.2175e-08	-1.1157	0.770025	0.556803	-1.92475	-0.619067
1.22e-08	0.520427	0.460272	0.281849	0.170331	0.0755792	0		1.22e-08	1.81919	-0.71261	-1.24726	1.35755	-0.118746
1.2225e-08	0.484112	0.460272	0.276635	0.176229	0.0780479	0.000228606		1.2225e-08	-1.25809	-0.657823	-1.93091	-0.62759	0.582831
1.225e-08	0.500935	0.470564	0.279735	0.164969	0.0715913	7.62021e-05		1.225e-08	0.268349	0.137879	-1.31235	-0.016146	-1.06897
1.2275e-08	0.498798	0.461918	0.281003	0.168365	0.0736802	0		1.2275e-08	0.151386	-0.429786	-0.980592	-0.509352	-0.467752
1.23e-08	0.47984	0.471799	0.285372	0.166041	0.0799468	0.000152404		1.23e-08	-1.42731	0.337396	-0.160477	0.577571	1.23969
1.2325e-08	0.492123	0.469741	0.288754	0.168543	0.0738701	0.000228606		1.2325e-08	-0.292601	0.244055	0.506023	0.71643	-0.31811
1.235e-08	0.486782	0.464389	0.297773	0.151743	0.0712115	0		1.235e-08	-0.689603	-0.0874369	2.06402	0.45852	-0.973721
1.2375e-08	0.476903	0.476739	0.274662	0.159964	0.0691227	7.62021e-05		1.2375e-08	-1.48261	0.860125	-1.45385	0.331914	-1.47998
1.24e-08	0.477704	0.468506	0.282272	0.160143	0.0755792	0		1.24e-08	-1.34619	0.319942	-0.117846	-0.538054	0.284045
1.2425e-08	0.490521	0.48909	0.284245	0.158177	0.0674136	0		1.2425e-08	-0.16169	1.86542	0.327974	-2.76559	-1.83978
1.245e-08	0.509746	0.475504	0.273675	0.148525	0.075959	0		1.245e-08	1.58395	0.9372	-1.21711	-1.16902	0.484587
1.2475e-08	0.505207	0.458625	0.270011	0.157819	0.0729206	0		1.2475e-08	1.25636	-0.231504	-1.66897	1.44438	-0.276448
1.25e-08	0.489186	0.461507	0.277339	0.171403	0.0750095	0		1.25e-08	-0.0756422	0.0320616	-0.371897	2.38411	0.33024
1.2525e-08	0.48251	0.450803	0.272125	0.163003	0.0643752	7.62021e-05		1.2525e-08	-0.592285	-0.691002	-1.07244	1.10819	-2.46535
1.255e-08	0.494259	0.450391	0.276353	0.175514	0.0717812	0		1.255e-08	0.503258	-0.667138	-0.267256	0.202585	-0.436445
1.2575e-08	0.499332	0.473034	0.27283	0.161037	0.0679833	0		1.2575e-08	1.0154	1.03409	-0.70031	-0.920615	-1.40734
1.26e-08	0.476636	0.43063	0.271561	0.156032	0.0744398	0.000152404		1.26e-08	-0.907102	-1.9987	-0.773762	0.206893	0.372259
1.2625e-08	0.478505	0.471387	0.273393	0.164254	0.0717812	7.62021e-05		1.2625e-08	-0.676741	1.02416	-0.350235	1.33735	-0.294298
1.265e-08	0.493458	0.483326	0.276494	0.15353	0.0683631	7.62021e-05		1.265e-08	0.703095	1.94992	0.278127	2.09399	-1.16711
1.2675e-08	0.520427	0.469741	0.281708	0.164075	0.0702621	0		1.2675e-08	3.14124	1.0139	1.24832	0.534368	-0.60941
1.27e-08	0.503872	0.471799	0.281003	0.156926	0.0757691	0		1.27e-08	1.75428	1.21918	1.26706	-1.05703	0.922919
1.2725e-08	0.484646	0.46233	0.272407	0.160322	0.0799468	0		1.2725e-08	0.12994	0.581866	0.0115114	1.7534	2.09974
1.275e-08	0.476636	0.456566	0.273534	0.149777	0.0702621	0		1.275e-08	-0.508969	0.214499	0.323557	0.347943	-0.469845
1.2775e-08	0.480908	0.469741	0.265643	0.158177	0.0679833	0		1.2775e-08	-0.0659739	1.23327	-0.824313	-0.248717	-1.0406
1.28e-08	0.480107	0.45739	0.258737	0.155317	0.0731105	7.62021e-05		1.28e-08	-0.0701852	0.382737	-1.81624	-1.74376	0.394653
1.2825e-08	0.498798	0.4331	0.264656	0.164433	0.0746297	0		1.2825e-08	1.64693	-1.34507	-0.729315	-0.415549	0.853732
1.285e-08	0.477971	0.451626	0.271421	0.152994	0.0769085	0		1.285e-08	-0.126316	0.0674271	0.497909	-1.15362	1.52002
1.2875e-08	0.483578	0.469741	0.269589	0.152458	0.0750095	0		1.2875e-08	0.43585	1.45187	0.328522	0.124002	1.05106
1.29e-08	0.478505	0.454096	0.253946	0.155496	0.0729206	0.000152404		1.29e-08	0.053302	0.35619	-2.09396	-0.315601	0.529078
1.2925e-08	0.470761	0.454508	0.254228	0.158534	0.0691227	7.62021e-05		1.2925e-08	-0.56648	0.440231	-1.92288	2.36143	-0.460355
1.295e-08	0.471028	0.481268	0.269166	0.15639	0.0681732	7.62021e-05		1.295e-08	-0.477068	2.46488	0.64571	-0.870581	-0.674551
1.2975e-08	0.499065	0.441746	0.271139	0.154424	0.0714014	0		1.2975e-08	2.07647	-0.392938	1.0976	0.468804	0.252579
1.3e-08	0.468625	0.416221	0.256905	0.152279	0.0767186	0		1.3e-08	-0.559006	-2.22293	-1.10847	-2.55629	1.75335
1.3025e-08	0.470761	0.447098	0.265643	0.147989	0.0645651	7.62021e-05		1.3025e-08	-0.303689	0.108026	0.452252	-1.0788	-1.52939
1.305e-08	0.475567	0.438864	0.268461	0.148525	0.0734903	0		1.305e-08	0.18933	-0.447217	1.0431	-0.479204	0.961965
1.3075e-08	0.485447	0.455743	0.267193	0.146917	0.0689328	0		1.3075e-08	1.13453	0.853579	0.961777	-0.430199	-0.243928
1.31e-08	0.49773	0.471387	0.258455	0.14513	0.0710216	0		1.31e-08	2.29514	2.06496	-0.352677	-1.79065	0.374534
1.3125e-08	0.491856	0.461507	0.263529	0.151206	0.0689328	7.62021e-05		1.3125e-08	1.83874	1.38766	0.611031	-0.332935	-0.155777
1.315e-08	0.470761	0.42569	0.265784	0.143342	0.0681732	0		1.315e-08	0.0236414	-1.21338	1.11088	-0.755598	-0.321152
1.3175e-08	0.48251	0.439275	0.252537	0.150313	0.0676035	7.62021e-05		1.3175e-08	1.13815	-0.15366	-0.957331	-0.90218	-0.434648
1.32e-08	0.477704	0.443804	0.25606	0.14227	0.0681732	0		1.32e-08	0.774989	0.235238	-0.248332	1.86867	-0.233802
1.3225e-08	0.456876	0.439275	0.253664	0.140661	0.0655146	0		1.3225e-08	-1.02157	-0.0483459	-0.521576	-0.501509	-0.925362
1.325e-08	0.487583	0.441746	0.260147	0.142985	0.0706419	7.62021e-05		1.325e-08	1.79113	0.187947	0.681787	0.660749	0.536843
1.3275e-08	0.482777	0.456566	0.258174	0.139053	0.0712115	0		1.3275e-08	1.42721	1.34368	0.478371	-1.27234	0.738929
1.33e-08	0.455808	0.430218	0.253805	0.15353	0.0653247	0		1.33e-08	-0.924031	-0.565375	-0.12622	0.114757	-0.850422
1.3325e-08	0.480908	0.451214	0.253382	0.140483	0.0712115	0.000152404		1.3325e-08	1.39178	1.05169	-0.0733	-1.62977	0.827103
1.335e-08	0.453405	0.440099	0.260569	0.140483	0.0649449	0		1.335e-08	-1.01139	0.275526	1.25365	1.66612	-0.871912
1.3375e-08	0.465955	0.455331	0.256905	0.152279	0.0634258	0		1.3375e-08	0.18016	1.46533	0.764548	0.254947	-1.25312
1.34e-08	0.471295	0.438452	0.253664	0.140304	0.0695025	7.62021e-05		1.34e-08	0.725236	0.257418	0.344791	-1.16053	0.481991
1.3425e-08	0.495594	0.447921	0.241685	0.147811	0.070452	0		1.3425e-08	2.97706	1.01796	-1.54586	1.86796	0.790084
1.345e-08	0.468625	0.440922	0.24394	0.146023	0.0605773	7.62021e-05		1.345e-08	0.615394	0.547123	-1.04507	-0.226323	-1.92525
1.3475e-08	0.463551	0.446274	0.250282	0.147274	0.0639954	0		1.3475e-08	0.223296	1.00057	0.146098	-0.57636	-0.928947
1.35e-08	0.449132	0.435982	0.249577	0.131903	0.068553	0		1.35e-08	-1.01249	0.281827	0.14994	0.825279	0.388466
1.3525e-08	0.458211	0.424043	0.241404	0.144236	0.0693126	7.62021e-05		1.3525e-08	-0.129331	-0.561763	-1.11032	-0.799315	0.643967
1.355e-08	0.482777	0.43804	0.250986	0.142091	0.0691227	0		1.355e-08	2.15405	0.540614	0.633313	0.548326	0.633316
1.3575e-08	0.458478	0.434747	0.244363	0.139231	0.0681732	0		1.3575e-08	0.0231997	0.345286	-0.367966	2.06973	0.40898
1.36e-08	0.453939	0.43557	0.240135	0.151385	0.0622864	0		1.36e-08	-0.323348	0.45916	-0.965482	-0.698964	-1.20474
1.3625e-08	0.465955	0.435982	0.244504	0.139768	0.0651348	0		1.3625e-08	0.828459	0.54215	-0.102341	-1.62481	-0.362638
1.365e-08	0.451802	0.43063	0.257187	0.13941	0.0641853	0.000152404		1.365e-08	-0.389247	0.191054	2.17986	0.726097	-0.589379
1.3675e-08	0.466489	0.448744	0.238444	0.142985	0.0695025	0		1.3675e-08	1.00629	1.60838	-0.894213	-0.657747	0.95164
1.37e-08	0.474232	0.440922	0.240981	0.144236	0.0634258	7.62021e-05		1.37e-08	1.77385	1.07108	-0.340998	-0.873132	-0.722811
1.3725e-08	0.443258	0.46233	0.236048	0.13655	0.0600076	0		1.3725e-08	-0.974095	2.7399	-1.06485	0.772294	-1.6492
1.375e-08	0.463551	0.421161	0.233089	0.144415	0.0649449	0		1.375e-08	0.933629	-0.317529	-1.45321	-2.02367	-0.212148
1.3775e-08	0.439252	0.431865	0.240417	0.152458	0.0624763	7.62021e-05		1.3775e-08	-1.21228	0.543055	-0.0775668	-0.0313312	-0.871266
1.38e-08	0.44486	0.44051	0.232948	0.131367	0.0641853	0		1.38e-08	-0.639106	1.24907	-1.24193	-0.421218	-0.346654
1.3825e-08	0.448865	0.431453	0.241967	0.131367	0.0670338	0		1.3825e-08	-0.211168	0.615139	0.428091	-0.0349419	0.502514
1.385e-08	0.433912	0.412515	0.240558	0.143878	0.0603874	7.62021e-05		1.385e-08	-1.51129	-0.768939	0.30488	-0.715252	-1.34667
1.3875e-08	0.449132	0.413751	0.23168	0.134406	0.064755	0		1.3875e-08	-0.0602577	-0.624802	-1.10836	0.537625	-0.0646493
1.39e-08	0.46008	0.419514	0.230693	0.141734	0.0698823	0		1.39e-08	1.00279	-0.13664	-1.16155	-1.53289	1.43648
1.3925e-08	0.44219	0.429395	0.239853	0.13387	0.0594379	7.62021e-05		1.3925e-08	-0.568084	0.665087	0.541621	-0.973289	-1.50163
1.395e-08	0.437116	0.412927	0.231116	0.14227	0.0655146	7.62021e-05		1.395e-08	-0.969219	-0.535782	-0.853708	-2.32697	0.272175
1.3975e-08	0.446195	0.424455	0.231257	0.136372	0.0643752	7.62021e-05		1.3975e-08	-0.075725	0.392079	-0.711902	1.80602	-0.0134169
1.4e-08	0.449666	0.407575	0.239572	0.140125	0.0653247	0		1.4e-08	0.305371	-0.842507	0.851079	-0.508219	0.298089
1.4025e-08	0.441121	0.425278	0.229002	0.142627	0.0600076	7.62021e-05		1.4025e-08	-0.414626	0.557088	-0.870449	-1.13971	-1.18546
1.405e-08	0.45287	0.432688	0.229143	0.13101	0.0668439	0.000152404		1.405e-08	0.725874	1.17354	-0.729723	-0.197985	0.813549
1.4075e-08	0.426969	0.417456	0.23774	0.134048	0.0645651	0		1.4075e-08	-1.58877	0.0619661	0.88764	-0.159767	0.199343
1.41e-08	0.452069	0.396459	0.230693	0.132618	0.0698823	7.62021e-05		1.41e-08	0.779037	-1.4919	-0.226481	1.07777	1.76702
1.4125e-08	0.432043	0.428983	0.236048	0.142449	0.0643752	7.62021e-05		1.4125e-08	-0.999181	1.04464	0.827964	2.46501	0.223231
1.415e-08	0.440854	0.426101	0.227311	0.13387	0.0653247	0		1.415e-08	-0.126376	0.875355	-0.586545	1.86076	0.535863
1.4175e-08	0.45741	0.396048	0.228298	0.132082	0.0607672	0		1.4175e-08	1.46086	-1.37552	-0.297351	0.755105	-0.73895
1.42e-08	0.436315	0.424866	0.23323	0.143164	0.0615268	7.62021e-05		1.42e-08	-0.419597	0.882947	0.686507	0.675983	-0.481679
1.4225e-08	0.439786	0.398518	0.229284	0.139589	0.0677934	7.62021e-05		1.4225e-08	-0.0371421	-1.0874	0.108819	-1.46621	1.36743
1.425e-08	0.436849	0.40634	0.231398	0.138338	0.0594379	0		1.425e-08	-0.245789	-0.437419	0.597957	0.693283	-1.00957
1.4275e-08	0.43231	0.402635	0.227452	0.131189	0.0638055	0.000152404		1.4275e-08	-0.602922	-0.672309	0.0173639	0.730901	0.292652
1.43e-08	0.445394	0.430218	0.227875	0.135657	0.0582985	7.62021e-05		1.43e-08	0.668528	1.49843	0.207471	-0.356307	-1.26517
1.4325e-08	0.452603	0.428571	0.217587	0.138338	0.0582985	0		1.4325e-08	1.39826	1.42288	-1.4999	1.36808	-1.22835
1.435e-08	0.428571	0.405105	0.230411	0.137265	0.0594379	0.000152404		1.435e-08	-0.763746	-0.333514	0.888144	0.307572	-0.860643
1.4375e-08	0.423231	0.421161	0.222802	0.127971	0.0624763	0		1.4375e-08	-1.19715	0.953792	-0.348001	-0.60763	0.0599195
1.44e-08	0.443792	0.420749	0.226607	0.131725	0.0639954	7.62021e-05		1.44e-08	0.770645	0.972675	0.443249	-1.49587	0.540046
1.4425e-08	0.444593	0.396048	0.223224	0.126542	0.0600076	7.62021e-05		1.4425e-08	0.907585	-0.883795	-0.0441397	0.712381	-0.583729
1.445e-08	0.436849	0.421573	0.217587	0.125469	0.0634258	7.62021e-05		1.445e-08	0.251059	1.1376	-0.935572	-1.10195	0.450517
1.4475e-08	0.429372	0.41128	0.222379	0.140304	0.0634258	7.62021e-05		1.4475e-08	-0.381749	0.392399	0.0336788	0.275933	0.488656
1.45e-08	0.41522	0.412927	0.216742	0.122252	0.0601975	0		1.45e-08	-1.63662	0.569863	-0.861114	1.83693	-0.416957
1.4525e-08	0.442457	0.415809	0.212091	0.126184	0.0645651	0		1.4525e-08	0.959337	0.843129	-1.58224	-1.27313	0.898151
1.455e-08	0.423765	0.407163	0.222943	0.129401	0.0582985	0		1.455e-08	-0.719648	0.223182	0.476256	0.739333	-0.89933
1.4575e-08	0.442991	0.385755	0.215896	0.135121	0.0600076	0		1.4575e-08	1.13381	-1.38789	-0.676566	0.713473	-0.361971
1.46e-08	0.425901	0.415397	0.217869	0.121358	0.0562096	0		1.46e-08	-0.398399	0.961644	-0.209649	-0.817528	-1.44019
1.4625e-08	0.423231	0.413751	0.21646	0.124933	0.0620965	0		1.4625e-08	-0.586635	0.883815	-0.351281	-0.00246208	0.325004
1.465e-08	0.439252	0.407987	0.21336	0.131189	0.0571591	0		1.465e-08	0.971458	0.485684	-0.798771	0.0903871	-1.09011
1.4675e-08	0.429105	0.399753	0.213923	0.129223	0.0582985	0		1.4675e-08	0.0846335	-0.105355	-0.585411	-0.632639	-0.718972
1.47e-08	0.441389	0.424866	0.204763	0.13655	0.0649449	0		1.47e-08	1.29563	1.89968	-2.13194	0.155295	1.27603
1.4725e-08	0.420828	0.414574	0.209977	0.131546	0.0641853	7.62021e-05		1.4725e-08	-0.567862	1.14823	-1.07747	1.43011	1.08991
1.475e-08	0.424833	0.402223	0.214346	0.122431	0.0579187	7.62021e-05		1.475e-08	-0.131636	0.234903	-0.173965	-0.478392	-0.723225
1.4775e-08	0.45474	0.398518	0.215192	0.123682	0.0634258	0		1.4775e-08	2.7348	-0.00508774	0.0910574	1.01109	0.940682
1.48e-08	0.4251	0.395636	0.215755	0.123146	0.063046	7.62021e-05		1.48e-08	0.01539	-0.181258	0.30501	0.617443	0.865565
1.4825e-08	0.423765	0.396048	0.205468	0.125469	0.0594379	7.62021e-05		1.4825e-08	-0.0491324	-0.100303	-1.45925	-1.3015	-0.166283
1.485e-08	0.414152	0.382874	0.209132	0.133333	0.0600076	7.62021e-05		1.485e-08	-0.892156	-1.08239	-0.681582	-2.70734	0.0385519
1.4875e-08	0.414419	0.405105	0.216883	0.123503	0.0613369	0		1.4875e-08	-0.806935	0.706533	0.845291	3.27828	0.469162
1.49e-08	0.4251	0.388637	0.222943	0.115818	0.061147	0		1.49e-08	0.258966	-0.534717	2.06669	-0.84924	0.449105
1.4925e-08	0.438184	0.40387	0.209696	0.127614	0.0575389	0.000152404		1.4925e-08	1.5529	0.708405	-0.248753	-1.06579	-0.587834
1.495e-08	0.408278	0.393989	0.2073	0.123146	0.0643752	0		1.495e-08	-1.20565	-0.0178594	-0.578519	0.0671816	1.48297
1.4975e-08	0.424299	0.406752	0.20575	0.12529	0.0579187	0.000152404		1.4975e-08	0.366216	1.03343	-0.754116	-1.65492	-0.404198
1.5e-08	0.416555	0.375875	0.215755	0.120107	0.0565894	7.62021e-05		1.5e-08	-0.30432	-1.34465	1.19729	-1.01253	-0.765523
1.5025e-08	0.411749	0.375051	0.202227	0.125827	0.057349	7.62021e-05		1.5025e-08	-0.698388	-1.36195	-1.18629	-0.923454	-0.50386
1.505e-08	0.41522	0.383697	0.203918	0.129937	0.0535511	7.62021e-05		1.505e-08	-0.310166	-0.633789	-0.766455	-0.155643	-1.60438
1.5075e-08	0.435781	0.383285	0.208145	0.125827	0.0607672	7.62021e-05		1.5075e-08	1.69635	-0.618348	0.123279	-0.900343	0.588821
1.51e-08	0.41522	0.371346	0.207159	0.119392	0.0655146	7.62021e-05		1.51e-08	-0.190102	-1.5121	0.0495608	1.16861	2.04675
1.5125e-08	0.414686	0.402635	0.20124	0.123503	0.063046	0		1.5125e-08	-0.18072	1.00457	-0.939366	1.32175	1.34363
1.515e-08	0.424032	0.377933	0.208991	0.121716	0.0632359	7.62021e-05		1.515e-08	0.766059	-0.897538	0.607497	-2.21765	1.437
1.5175e-08	0.406943	0.387814	0.200254	0.122788	0.0563995	0		1.5175e-08	-0.796018	-0.0688916	-0.908035	-0.235757	-0.580613
1.52e-08	0.394393	0.390284	0.214346	0.12118	0.0581086	7.62021e-05		1.52e-08	-1.92916	0.17472	1.82398	2.15602	-0.0322108
1.5225e-08	0.403738	0.419926	0.209977	0.130295	0.0577288	0		1.5225e-08	-0.981758	2.56999	1.12008	1.06418	-0.111668
1.525e-08	0.428571	0.385344	0.197012	0.125112	0.0617167	0		1.525e-08	1.44098	-0.120124	-1.19198	0.312244	1.12484
1.5275e-08	0.422697	0.379168	0.201945	0.126005	0.0535511	0		1.5275e-08	0.942426	-0.561906	-0.163449	0.620239	-1.30254
1.53e-08	0.40721	0.361466	0.195885	0.112958	0.0598177	0		1.53e-08	-0.473338	-1.91935	-1.19145	0.334132	0.623028
1.5325e-08	0.40534	0.382874	0.202931	0.119214	0.0605773	7.62021e-05		1.5325e-08	-0.592325	-0.172657	0.235617	0.140839	0.887708
1.535e-08	0.416021	0.373405	0.19814	0.121001	0.0586783	0		1.535e-08	0.486485	-0.877631	-0.557204	-0.304337	0.348402
1.5375e-08	0.409079	0.388226	0.192362	0.122252	0.0560197	0		1.5375e-08	-0.116864	0.348459	-1.53807	1.29135	-0.422128
1.54e-08	0.39012	0.373405	0.202931	0.112243	0.0565894	7.62021e-05		1.54e-08	-1.87005	-0.783414	0.557514	1.22364	-0.215615
1.5425e-08	0.422964	0.375051	0.193912	0.125469	0.0560197	0		1.5425e-08	1.33063	-0.605069	-1.03636	0.178848	-0.354513
1.545e-08	0.391188	0.387402	0.195885	0.111707	0.0598177	7.62021e-05		1.545e-08	-1.65156	0.426989	-0.558486	-1.31071	0.832919
1.5475e-08	0.416021	0.38452	0.204481	0.121358	0.0565894	7.62021e-05		1.5475e-08	0.786366	0.245039	1.17339	-0.0558495	-0.113691
1.55e-08	0.421896	0.400988	0.200676	0.124576	0.0533612	0		1.55e-08	1.40972	1.60796	0.560328	-0.189912	-1.06227
1.5525e-08	0.386649	0.37217	0.202368	0.112601	0.0541208	7.62021e-05		1.5525e-08	-1.91271	-0.646532	0.987681	-0.0395938	-0.797961
1.555e-08	0.408011	0.393989	0.195321	0.117605	0.0586783	0		1.555e-08	0.19675	1.14566	-0.244158	-0.682422	0.624872
1.5575e-08	0.417356	0.384109	0.200676	0.122967	0.0605773	0		1.5575e-08	1.1543	0.402992	0.879463	0.197533	1.23883
1.56e-08	0.397063	0.374228	0.201381	0.114209	0.0552602	7.62021e-05		1.56e-08	-0.737914	-0.340921	1.11995	0.634203	-0.350959
1.5625e-08	0.414686	0.379168	0.183766	0.114924	0.0571591	0		1.5625e-08	1.01703	0.102177	-2.13432	-1.73159	0.262997
1.565e-08	0.402403	0.354879	0.188557	0.108132	0.0560197	0		1.565e-08	-0.106582	-1.79939	-1.11702	-1.39252	-0.0520838
1.5675e-08	0.403204	0.378345	0.192503	0.114388	0.0545006	0		1.5675e-08	0.0295013	0.130777	-0.258798	0.672336	-0.484226
1.57e-08	0.397063	0.396871	0.186725	0.109741	0.0569692	7.62021e-05		1.57e-08	-0.504123	1.66689	-1.26141	-1.03193	0.30592
1.5725e-08	0.415754	0.368053	0.194758	0.116711	0.0577288	0		1.5725e-08	1.35919	-0.602313	0.38256	-0.723039	0.572799
1.575e-08	0.41255	0.392754	0.193348	0.11975	0.0596278	0		1.575e-08	1.10939	1.43247	0.216585	-0.830588	1.19026
1.5775e-08	0.404272	0.370111	0.195603	0.11546	0.0600076	0		1.5775e-08	0.368448	-0.343278	0.754614	0.0248161	1.34145
1.58e-08	0.415754	0.37464	0.185879	0.117248	0.053741	0		1.58e-08	1.53852	0.0684531	-1.01429	0.817837	-0.553789
1.5825e-08	0.401869	0.390284	0.193771	0.104736	0.0567793	0		1.5825e-08	0.253404	1.37748	0.610295	0.807428	0.415129
1.585e-08	0.389052	0.377933	0.196449	0.109562	0.0550703	7.62021e-05		1.585e-08	-0.930247	0.428202	1.23168	0.699917	-0.0788694
1.5875e-08	0.391722	0.369288	0.18743	0.114567	0.0531713	0		1.5875e-08	-0.613552	-0.223234	-0.408605	-0.312458	-0.632564
1.59e-08	0.392256	0.37464	0.198985	0.118499	0.0596278	0		1.59e-08	-0.503806	0.256148	1.93294	1.13015	1.39535
1.5925e-08	0.39012	0.37217	0.187711	0.107596	0.0590581	0.000152404		1.5925e-08	-0.653348	0.103212	-0.148832	0.0504739	1.25314
1.595e-08	0.408812	0.379992	0.191234	0.110813	0.0558299	0		1.595e-08	1.22164	0.783543	0.63846	0.0703085	0.287246
1.5975e-08	0.387183	0.359819	0.187289	0.116175	0.0529814	0		1.5975e-08	-0.823418	-0.804211	-0.0256921	2.98023	-0.56284
1.6e-08	0.376235	0.361877	0.184752	0.112064	0.0526016	7.62021e-05		1.6e-08	-1.83175	-0.591242	-0.417568	-0.280777	-0.64863
1.6025e-08	0.391722	0.383285	0.186443	0.103843	0.063046	7.62021e-05		1.6025e-08	-0.265945	1.1927	0.0139064	-2.18343	2.62722
1.605e-08	0.400267	0.368876	0.180242	0.107596	0.0560197	0		1.605e-08	0.625095	0.0694552	-1.09592	-1.12433	0.477742
1.6075e-08	0.391188	0.365994	0.175169	0.110634	0.0531713	0		1.6075e-08	-0.202448	-0.118409	-1.98863	-1.2382	-0.375921
1.61e-08	0.385314	0.354055	0.183061	0.119929	0.0527915	0		1.61e-08	-0.718426	-1.04361	-0.343659	-1.38538	-0.462378
1.6125e-08	0.377837	0.366818	0.189825	0.105809	0.0508925	0		1.6125e-08	-1.39185	0.0411458	1.08448	0.660491	-1.02275
1.615e-08	0.395995	0.368876	0.180806	0.108847	0.0446259	0		1.615e-08	0.440829	0.255226	-0.584966	0.547864	-2.9473
1.6175e-08	0.4	0.391931	0.18447	0.110277	0.0622864	7.62021e-05		1.6175e-08	0.890998	2.18199	0.236432	0.204963	2.59862
1.62e-08	0.392256	0.380815	0.177706	0.112779	0.0594379	0		1.62e-08	0.190925	1.32268	-0.994991	0.880126	1.74249
1.6225e-08	0.389052	0.358584	0.179256	0.109383	0.049943	7.62021e-05		1.6225e-08	-0.0652996	-0.446023	-0.589544	0.338874	-1.19545
1.625e-08	0.397063	0.351173	0.17376	0.113494	0.0600076	0.000152404		1.625e-08	0.778186	-1.00601	-1.57574	0.521104	1.98823
1.6275e-08	0.409346	0.363936	0.183906	0.10706	0.0493733	7.62021e-05		1.6275e-08	2.04225	0.0833779	0.530143	2.45302	-1.31253
1.63e-08	0.388518	0.376287	0.1708	0.100447	0.0493733	0		1.63e-08	0.0549316	1.14063	-1.9661	-0.171836	-1.28202
1.6325e-08	0.389853	0.373405	0.179397	0.110277	0.0565894	0		1.6325e-08	0.243631	0.9513	-0.163292	-0.288572	1.01539
1.635e-08	0.398665	0.361054	0.187007	0.107775	0.0546905	7.62021e-05		1.635e-08	1.16819	-0.0148677	1.44824	1.71537	0.450772
1.6375e-08	0.385581	0.388226	0.179679	0.107775	0.0514622	0		1.6375e-08	-0.0620742	2.26079	0.0916501	0.571451	-0.533388
1.64e-08	0.401335	0.365583	0.172914	0.104379	0.0601975	0		1.64e-08	1.54766	0.448739	-1.15658	0.454534	2.24955
1.6425e-08	0.392523	0.375875	0.168264	0.099017	0.0497531	0		1.6425e-08	0.737051	1.34084	-1.98666	0.803077	-1.01042
1.645e-08	0.385314	0.368053	0.164177	0.109383	0.0520319	0.000228606		1.645e-08	0.08328	0.74426	-2.70666	1.78561	-0.26071
1.6475e-08	0.390387	0.35776	0.179115	0.110634	0.0535511	0		1.6475e-08	0.641631	-0.0566661	0.377827	1.20219	0.250373
1.65e-08	0.374633	0.372993	0.176156	0.108132	0.0526016	7.62021e-05		1.65e-08	-0.857982	1.24387	-0.115726	1.11815	-0.0183304
1.6525e-08	0.382109	0.35529	0.181652	0.0991957	0.048234	0		1.6525e-08	-0.0620263	-0.1691	1.08551	1.46853	-1.36959
1.655e-08	0.402403	0.363524	0.175028	0.111349	0.0529814	0.000152404		1.655e-08	2.00378	0.555663	-0.145582	0.0100926	0.16436
1.6575e-08	0.38024	0.338823	0.176297	0.104558	0.0516521	0		1.6575e-08	-0.133482	-1.43816	0.207474	0.22497	-0.225988
1.66e-08	0.40988	0.356114	0.177706	0.100626	0.0512723	0		1.66e-08	2.86169	0.0350355	0.589626	-1.17255	-0.315793
1.6625e-08	0.366355	0.376287	0.170378	0.113137	0.053741	7.62021e-05		1.6625e-08	-1.39776	1.74877	-0.790333	-0.589135	0.499128
1.665e-08	0.379172	0.342116	0.170941	0.110992	0.0541208	7.62021e-05		1.665e-08	-0.0694876	-1.03264	-0.579729	-0.341207	0.651225
1.6675e-08	0.37757	0.344175	0.167559	0.099017	0.0531713	7.62021e-05		1.6675e-08	-0.172037	-0.817583	-1.1671	0.278324	0.380437
1.67e-08	0.375968	0.365583	0.166432	0.100983	0.0554501	0		1.67e-08	-0.274798	1.0017	-1.29947	-0.282895	1.13761
1.6725e-08	0.383178	0.370523	0.17531	0.108132	0.0508925	0		1.6725e-08	0.499106	1.4576	0.597626	-0.879648	-0.283928
1.675e-08	0.382377	0.34541	0.168828	0.109562	0.0520319	0		1.675e-08	0.476285	-0.580993	-0.621461	-0.326663	0.110217
1.6775e-08	0.375434	0.373816	0.168546	0.105273	0.053741	0		1.6775e-08	-0.158796	1.82389	-0.582782	-0.756118	0.686996
1.68e-08	0.373298	0.336352	0.172632	0.103128	0.0563995	7.62021e-05		1.68e-08	-0.315584	-1.24476	0.345676	-0.745583	1.56835
1.6825e-08	0.377303	0.352408	0.167559	0.103664	0.0508925	7.62021e-05		1.6825e-08	0.140273	0.135363	-0.592569	0.182868	-0.162423
1.685e-08	0.386115	0.353643	0.158399	0.0993744	0.0529814	7.62021e-05		1.685e-08	1.07681	0.283277	-2.36867	2.98651	0.537036
1.6875e-08	0.370093	0.338411	0.177142	0.0927614	0.0510824	0		1.6875e-08	-0.467731	-0.941092	1.55891	-1.36352	-0.041088
1.69e-08	0.376235	0.35776	0.174605	0.093655	0.0495632	0		1.69e-08	0.202488	0.716969	1.13749	-0.159661	-0.498445
1.6925e-08	0.3749	0.359819	0.168968	0.10134	0.0461451	0		1.6925e-08	0.125144	0.934246	0.0786764	-0.867441	-1.56677
1.695e-08	0.387984	0.364347	0.168264	0.112243	0.0529814	0		1.695e-08	1.49227	1.35815	0.0300389	0.682439	0.660312
1.6975e-08	0.361282	0.32853	0.171505	0.100983	0.044436	0.000152404		1.6975e-08	-1.12776	-1.59026	0.792746	-0.0607205	-2.05926
1.7e-08	0.366622	0.356937	0.16009	0.0968722	0.0451956	0		1.7e-08	-0.536701	0.829902	-1.46227	-0.394183	-1.78628
1.7025e-08	0.371429	0.362701	0.166432	0.0965147	0.0526016	7.62021e-05		1.7025e-08	0.00149336	1.35782	-0.0607735	-0.694504	0.630233
1.705e-08	0.36502	0.364759	0.171364	0.0991957	0.0524117	0		1.705e-08	-0.586633	1.57596	1.05305	1.72341	0.599525
1.7075e-08	0.385581	0.342528	0.163754	0.0934763	0.0512723	0		1.7075e-08	1.5364	-0.242529	-0.425062	-0.264551	0.26192
1.71e-08	0.386649	0.340469	0.162486	0.101698	0.0497531	7.62021e-05		1.71e-08	1.70076	-0.370952	-0.593805	-0.877517	-0.199208
1.7125e-08	0.380507	0.339646	0.171082	0.102592	0.0533612	0		1.7125e-08	1.13917	-0.395905	1.28316	0.615899	0.998087
1.715e-08	0.370093	0.358584	0.160231	0.101162	0.0507026	0		1.715e-08	0.146053	1.24	-0.874707	0.763451	0.167559
1.7175e-08	0.365287	0.334706	0.168405	0.0991957	0.0480441	7.62021e-05		1.7175e-08	-0.282997	-0.723103	0.9188	0.98057	-0.664539
1.72e-08	0.373031	0.327707	0.162345	0.108847	0.0526016	7.62021e-05		1.72e-08	0.554086	-1.26838	-0.247835	0.0530171	0.843589
1.7225e-08	0.359947	0.331412	0.163472	0.101698	0.0524117	0		1.7225e-08	-0.711628	-0.912806	0.0811866	-0.043274	0.81236
1.725e-08	0.36502	0.356114	0.167982	0.0995532	0.0488036	7.62021e-05		1.725e-08	-0.143736	1.2134	1.11719	0.903737	-0.330302
1.7275e-08	0.358611	0.343351	0.155581	0.0947274	0.0488036	7.62021e-05		1.7275e-08	-0.736745	0.181764	-1.38166	1.1213	-0.30104
1.73e-08	0.366889	0.341704	0.160795	0.0979446	0.0493733	0		1.73e-08	0.156129	0.0870314	-0.198078	0.152935	-0.0862817
1.7325e-08	0.361282	0.332235	0.167418	0.0907954	0.0495632	0		1.7325e-08	-0.35664	-0.668944	1.284	1.41741	0.00494241
1.735e-08	0.365287	0.31865	0.166291	0.0997319	0.0503228	7.62021e-05		1.735e-08	0.104426	-1.77432	1.14195	0.865999	0.282128
1.7375e-08	0.372497	0.327295	0.160231	0.0907954	0.0526016	0		1.7375e-08	0.891245	-0.999925	-0.0380823	0.417985	1.0559
1.74e-08	0.37223	0.347468	0.155158	0.0972297	0.0533612	0		1.74e-08	0.919942	0.751964	-1.01376	-1.15375	1.3344
1.7425e-08	0.359413	0.322355	0.166291	0.0938338	0.046335	0		1.7425e-08	-0.326756	-1.33212	1.42569	0.852483	-0.934089
1.745e-08	0.360481	0.324825	0.158399	0.0965147	0.0480441	0		1.745e-08	-0.163253	-1.0796	-0.146273	0.296717	-0.346035
1.7475e-08	0.346595	0.344175	0.162204	0.102592	0.0524117	0		1.7475e-08	-1.52146	0.606199	0.750816	-0.471999	1.11448
1.75e-08	0.36502	0.335117	0.158117	0.101162	0.0453855	7.62021e-05		1.75e-08	0.409003	-0.118929	-0.0213185	-1.24302	-1.16056
1.7525e-08	0.375701	0.330589	0.156144	0.0954424	0.0474744	7.62021e-05		1.7525e-08	1.55293	-0.460238	-0.347731	-0.180368	-0.44661
1.755e-08	0.376502	0.331	0.152621	0.091689	0.0507026	0		1.755e-08	1.69065	-0.381809	-1.00463	-0.0698288	0.64302
1.7575e-08	0.360748	0.344175	0.157413	0.0911528	0.0522218	0		1.7575e-08	0.138463	0.783429	0.104416	0.35931	1.17227
1.76e-08	0.342857	0.319473	0.156708	0.089723	0.0508925	0		1.76e-08	-1.63436	-1.27738	0.0459135	0.824774	0.764465
1.7625e-08	0.357009	0.333882	0.151917	0.0961573	0.0474744	0.000152404		1.7625e-08	-0.134102	-0.00584134	-0.884389	0.510328	-0.332575
1.765e-08	0.373565	0.340469	0.15403	0.093655	0.0497531	0		1.765e-08	1.61421	0.599974	-0.342935	1.40339	0.447558
1.7675e-08	0.346328	0.31865	0.147689	0.0952636	0.0497531	0		1.7675e-08	-1.11855	-1.21971	-1.60809	-1.43842	0.476689
1.77e-08	0.343925	0.346645	0.14938	0.0932976	0.0469047	7.62021e-05		1.77e-08	-1.311	1.21599	-1.15702	-0.225084	-0.435466
1.7725e-08	0.365821	0.31865	0.155581	0.0927614	0.049943	0		1.7725e-08	0.98777	-1.13442	0.261889	-1.64948	0.597784
1.775e-08	0.359947	0.325237	0.148816	0.0965147	0.0457653	0		1.775e-08	0.440221	-0.527877	-1.09932	0.173875	-0.756086
1.7775e-08	0.366622	0.319885	0.142897	0.0907954	0.0398785	0		1.7775e-08	1.18051	-0.943426	-2.28289	0.999889	-2.67879
1.78e-08	0.353271	0.332647	0.150789	0.096336	0.0461451	7.62021e-05		1.78e-08	-0.13633	0.193477	-0.496805	2.22188	-0.574377
1.7825e-08	0.348999	0.326883	0.158822	0.0922252	0.0491834	0		1.7825e-08	-0.521555	-0.257678	1.32422	-0.535507	0.462102
1.785e-08	0.357009	0.334294	0.146139	0.0950849	0.0497531	0		1.785e-08	0.356733	0.421724	-1.32215	0.184169	0.680153
1.7875e-08	0.350067	0.337587	0.150085	0.0899017	0.0512723	7.62021e-05		1.7875e-08	-0.303903	0.748298	-0.381177	-0.0656863	1.21426
1.79e-08	0.367957	0.340881	0.147971	0.0868633	0.0541208	0		1.79e-08	1.59408	1.07533	-0.749528	0.764214	2.1917
1.7925e-08	0.359146	0.31865	0.153749	0.0859696	0.0438663	0		1.7925e-08	0.740462	-0.794153	0.591629	1.01912	-1.19418
1.795e-08	0.344459	0.343763	0.146421	0.096336	0.0493733	7.62021e-05		1.795e-08	-0.720894	1.41159	-0.908557	-0.458941	0.669212
1.7975e-08	0.344459	0.335529	0.142616	0.0906166	0.0457653	0		1.7975e-08	-0.667336	0.74601	-1.64736	0.988091	-0.506075
1.8e-08	0.33725	0.347468	0.146702	0.0907954	0.051842	0		1.8e-08	-1.35915	1.81961	-0.670861	-0.747819	1.55145
1.8025e-08	0.331642	0.309181	0.150225	0.0909741	0.0484239	7.62021e-05		1.8025e-08	-1.88635	-1.44154	0.185032	-0.421897	0.438178
1.805e-08	0.362083	0.346233	0.151494	0.089723	0.0469047	7.62021e-05		1.805e-08	1.31781	1.80162	0.550762	-0.567426	-0.0417374
1.8075e-08	0.36502	0.335529	0.151353	0.0925827	0.044436	0		1.8075e-08	1.6769	0.920315	0.609178	0.304281	-0.840608
1.81e-08	0.351402	0.340058	0.139515	0.0952636	0.0448158	0		1.81e-08	0.319799	1.35571	-1.89228	0.741204	-0.686128
1.8125e-08	0.350334	0.346645	0.150507	0.0920465	0.0436764	7.62021e-05		1.8125e-08	0.262888	1.96997	0.602272	0.851024	-1.04115
1.815e-08	0.33992	0.321531	0.149239	0.0915103	0.0516521	0		1.815e-08	-0.764677	-0.162173	0.413016	-0.170476	1.6641
1.8175e-08	0.350601	0.335529	0.148393	0.0879357	0.044436	7.62021e-05		1.8175e-08	0.39839	1.09449	0.315997	-0.0253035	-0.732014
1.82e-08	0.350601	0.32606	0.147266	0.0872207	0.0410179	0		1.82e-08	0.45233	0.316211	0.156499	0.303104	-1.85476
1.8225e-08	0.339386	0.342116	0.142334	0.0904379	0.0417774	0		1.8225e-08	-0.660937	1.75385	-0.842117	0.522287	-1.57286
1.825e-08	0.33992	0.331412	0.143884	0.0911528	0.0474744	0		1.825e-08	-0.552255	0.867344	-0.413503	-0.102098	0.373387
1.8275e-08	0.334312	0.321531	0.148393	0.0938338	0.0501329	0		1.8275e-08	-1.08367	0.0510148	0.669733	-0.361034	1.29815
1.83e-08	0.33725	0.324002	0.145434	0.091689	0.0446259	0		1.83e-08	-0.724719	0.308621	0.103066	-0.142723	-0.532285
1.8325e-08	0.340187	0.313709	0.147266	0.0929401	0.0520319	0.000152404		1.8325e-08	-0.365348	-0.54544	0.596057	1.14413	1.99729
1.835e-08	0.358879	0.343763	0.144166	0.0872207	0.0457653	0		1.835e-08	1.64022	2.11707	-0.00407151	0.663627	-0.0928391
1.8375e-08	0.316155	0.306299	0.143884	0.0920465	0.0469047	7.62021e-05		1.8375e-08	-2.77175	-1.10807	0.0201013	-0.298481	0.320197
1.84e-08	0.355674	0.318238	0.142052	0.0875782	0.0497531	0		1.84e-08	1.41387	-0.0239303	-0.300634	1.17756	1.31294
1.8425e-08	0.357276	0.305476	0.13106	0.0873995	0.0484239	7.62021e-05		1.8425e-08	1.63583	-1.09694	-2.6628	0.39848	0.890732
1.845e-08	0.351669	0.324413	0.140079	0.0822163	0.0434865	0		1.845e-08	1.1027	0.600892	-0.568001	0.692536	-0.756808
1.8475e-08	0.343658	0.329765	0.146843	0.0857909	0.0474744	0		1.8475e-08	0.31671	1.11211	1.0286	0.35602	0.624528
1.85e-08	0.323364	0.309592	0.13867	0.0825737	0.0472845	0		1.85e-08	-1.75941	-0.611814	-0.711861	0.167097	0.587836
1.8525e-08	0.335915	0.314533	0.144589	0.0932976	0.0400684	0		1.8525e-08	-0.389858	-0.137028	0.698744	-0.469336	-1.83997
1.855e-08	0.330307	0.336352	0.138529	0.0891868	0.0423471	0		1.855e-08	-0.926511	1.81916	-0.573594	0.867824	-1.03826
1.8575e-08	0.330307	0.308357	0.137965	0.0920465	0.0459552	7.62021e-05		1.8575e-08	-0.874369	-0.595195	-0.615437	1.05115	0.217899
1.86e-08	0.324967	0.306299	0.139515	0.0866845	0.0396886	7.62021e-05		1.86e-08	-1.38429	-0.734485	-0.182277	-0.260196	-1.89294
1.8625e-08	0.3247	0.303005	0.140784	0.0781055	0.0419673	7.62021e-05		1.8625e-08	-1.3607	-0.98264	0.188411	-1.65001	-1.0894
1.865e-08	0.326035	0.317415	0.139797	0.089008	0.0442461	7.62021e-05		1.865e-08	-1.16827	0.326524	0.0515466	-0.907792	-0.284505
1.8675e-08	0.34526	0.311239	0.139938	0.0841823	0.0461451	0.000152404		1.8675e-08	0.911432	-0.175064	0.168723	-0.501421	0.391841
1.87e-08	0.333244	0.319473	0.135428	0.0815013	0.0446259	0		1.87e-08	-0.303543	0.592393	-0.765425	0.807551	-0.100993
1.8725e-08	0.342857	0.32853	0.143602	0.089008	0.0450057	0		1.8725e-08	0.764334	1.43357	1.16911	-1.22822	0.0560185
1.875e-08	0.338852	0.321531	0.138106	0.0865058	0.0442461	7.62021e-05		1.875e-08	0.3941	0.858791	0.00951012	0.798541	-0.177547
1.8775e-08	0.341255	0.314944	0.131342	0.0802502	0.0394987	7.62021e-05		1.8775e-08	0.701157	0.319401	-1.44155	0.718176	-1.78058
1.88e-08	0.340988	0.317415	0.129651	0.0852547	0.0440562	0		1.88e-08	0.725849	0.579717	-1.74363	0.901652	-0.189432
1.8825e-08	0.341789	0.305476	0.134724	0.0820375	0.0480441	0		1.8825e-08	0.863624	-0.434346	-0.507074	-0.0113308	1.20849
1.885e-08	0.313485	0.317826	0.137542	0.0752458	0.0451956	0		1.885e-08	-2.08441	0.700371	0.218646	-2.32793	0.255816
1.8875e-08	0.343925	0.286949	0.137824	0.0857909	0.0436764	7.62021e-05		1.8875e-08	1.19619	-1.99311	0.367184	0.619295	-0.240666
1.89e-08	0.341522	0.311239	0.139797	0.0924039	0.042537	0		1.89e-08	0.994152	0.200624	0.902483	1.562	-0.607115
1.8925e-08	0.326035	0.30177	0.134865	0.0811439	0.0396886	7.62021e-05		1.8925e-08	-0.598561	-0.597835	-0.141242	0.796462	-1.56402
1.895e-08	0.329773	0.299712	0.136133	0.0798928	0.0431067	7.62021e-05		1.895e-08	-0.149234	-0.73951	0.233019	3.07382	-0.358223
1.8975e-08	0.325768	0.307122	0.135851	0.0877569	0.0404482	0		1.8975e-08	-0.523379	-0.0399945	0.252294	1.20273	-1.25101
1.9e-08	0.334312	0.306711	0.129228	0.0781055	0.0465249	0		1.9e-08	0.438377	-0.0351655	-1.18595	0.318732	0.876898
1.9025e-08	0.328438	0.30177	0.125564	0.0815013	0.0451956	7.62021e-05		1.9025e-08	-0.135311	-0.433485	-1.9475	-2.51666	0.443814
1.905e-08	0.33004	0.307534	0.130778	0.0838248	0.0415875	7.62021e-05		1.905e-08	0.0874508	0.12089	-0.665856	0.302979	-0.779912
1.9075e-08	0.338585	0.29189	0.136838	0.0865058	0.0431067	0.000152404		1.9075e-08	1.05144	-1.23222	0.814023	0.716061	-0.227258
1.91e-08	0.348732	0.32853	0.129651	0.0825737	0.0412077	0		1.91e-08	2.18789	2.07659	-0.762718	-0.903159	-0.860474
1.9125e-08	0.346862	0.299712	0.129932	0.0759607	0.0438663	0.000152404		1.9125e-08	2.04153	-0.453287	-0.616024	-0.106881	0.0888598
1.915e-08	0.330307	0.307534	0.129369	0.0818588	0.0391189	0		1.915e-08	0.323898	0.286406	-0.664938	0.537481	-1.53596
1.9175e-08	0.327904	0.305064	0.134865	0.0829312	0.042537	0		1.9175e-08	0.11867	0.106978	0.691495	1.29894	-0.321246
1.92e-08	0.311615	0.311239	0.142616	0.0775693	0.0450057	0		1.92e-08	-1.57442	0.700787	2.57513	1.63809	0.564744
1.9225e-08	0.311615	0.32359	0.129228	0.0856122	0.0368401	0		1.9225e-08	-1.52383	1.84839	-0.452955	-0.029804	-2.2559
1.925e-08	0.32737	0.322767	0.126409	0.0775693	0.0503228	0		1.925e-08	0.216992	1.8171	-1.02797	1.00404	2.47374
1.9275e-08	0.320961	0.29436	0.125564	0.0811439	0.0387391	7.62021e-05		1.9275e-08	-0.419297	-0.687973	-1.14479	-0.398544	-1.54423
1.93e-08	0.332977	0.29436	0.126691	0.0800715	0.0396886	0		1.93e-08	0.923014	-0.647535	-0.801551	-0.177069	-1.18759
1.9325e-08	0.311081	0.284068	0.136979	0.0772118	0.0465249	0		1.9325e-08	-1.37922	-1.53151	1.68428	0.394013	1.22941
1.935e-08	0.319092	0.303005	0.125	0.0739946	0.0457653	7.62021e-05		1.935e-08	-0.466838	0.210367	-1.03702	0.538858	0.990372
1.9375e-08	0.326569	0.310004	0.133315	0.0788204	0.0455754	0		1.9375e-08	0.389316	0.88091	0.99218	0.72281	0.950547
1.94e-08	0.306275	0.312886	0.124014	0.0782842	0.0442461	0		1.94e-08	-1.74599	1.18183	-1.10902	1.41361	0.510899
1.9425e-08	0.32737	0.296418	0.130637	0.0820375	0.0421572	0		1.9425e-08	0.579028	-0.259957	0.527707	1.16978	-0.196244
1.945e-08	0.32737	0.298065	0.13867	0.0807864	0.0448158	7.62021e-05		1.945e-08	0.630795	-0.0708792	2.50041	1.3549	0.763674
1.9475e-08	0.327103	0.298065	0.126832	0.077748	0.0451956	0		1.9475e-08	0.653733	-0.0301567	-0.205766	-0.298031	0.923728
1.95e-08	0.328972	0.298065	0.12049	0.0756032	0.0368401	7.62021e-05		1.95e-08	0.907496	0.0105388	-1.62225	-0.0755298	-1.99099
1.9525e-08	0.319626	0.299712	0.127114	0.0754245	0.0470946	0		1.9525e-08	-0.0515318	0.199997	0.0214544	0.304138	1.64591
1.955e-08	0.325501	0.293948	0.129369	0.0791778	0.0415875	7.62021e-05		1.955e-08	0.6354	-0.28046	0.635282	-0.886164	-0.26892
1.9575e-08	0.323097	0.291478	0.121195	0.0720286	0.0417774	0		1.9575e-08	0.426567	-0.463676	-1.22093	1.02625	-0.176518
1.96e-08	0.322029	0.284479	0.124436	0.0763181	0.0396886	0		1.96e-08	0.362065	-1.05736	-0.373535	1.36865	-0.888957
1.9625e-08	0.318291	0.297242	0.125423	0.0800715	0.0423471	0		1.9625e-08	0.00772245	0.139003	-0.0598216	-1.08696	0.0756977
1.965e-08	0.332176	0.297653	0.121477	0.0748883	0.0434865	0		1.965e-08	1.56607	0.216914	-0.918993	-0.86512	0.504421
1.9675e-08	0.303605	0.315356	0.12951	0.0770331	0.0400684	0		1.9675e-08	-1.48596	1.8644	1.07338	0.226628	-0.680156
1.97e-08	0.32283	0.295595	0.12655	0.0738159	0.0410179	0		1.97e-08	0.654119	0.111187	0.448466	0.252662	-0.318722
1.9725e-08	0.306809	0.275422	0.127114	0.0773905	0.0398785	7.62021e-05		1.9725e-08	-1.03771	-1.68217	0.663278	0.199374	-0.697723
1.975e-08	0.300134	0.291066	0.115276	0.0770331	0.0402583	7.62021e-05		1.975e-08	-1.71453	-0.219848	-2.08824	-1.52055	-0.538042
1.9775e-08	0.314286	0.292301	0.121618	0.0759607	0.0372199	0		1.9775e-08	-0.122962	-0.0672847	-0.492941	-0.345273	-1.59281
1.98e-08	0.309479	0.295183	0.126127	0.0793566	0.0402583	0		1.98e-08	-0.596509	0.235456	0.666865	-1.47425	-0.488233
1.9825e-08	0.306008	0.296007	0.117249	0.0818588	0.0387391	0		1.9825e-08	-0.925169	0.350879	-1.38588	0.500114	-1.00415
1.985e-08	0.313752	0.286126	0.124154	0.0866845	0.0417774	7.62021e-05		1.985e-08	-0.0296649	-0.510327	0.351479	0.246156	0.102673
1.9875e-08	0.327904	0.324413	0.116545	0.0789991	0.0396886	7.62021e-05		1.9875e-08	1.56745	3.02574	-1.40211	-0.407921	-0.61688
1.99e-08	0.30227	0.289008	0.124577	0.0789991	0.0413976	0		1.99e-08	-1.18443	-0.16749	0.611423	0.695333	0.0176784
1.9925e-08	0.30494	0.284891	0.11894	0.0697051	0.0413976	7.62021e-05		1.9925e-08	-0.842576	-0.504041	-0.670379	1.32093	0.0428422
1.995e-08	0.305474	0.276657	0.122322	0.0772118	0.0385492	0		1.995e-08	-0.734237	-1.21795	0.224834	-0.978058	-0.950253
1.9975e-08	0.329239	0.287361	0.119504	0.075067	0.0400684	0		1.9975e-08	1.92052	-0.198397	-0.378977	-0.553926	-0.382399
2e-08	0.295327	0.297653	0.115276	0.0732797	0.0476643	0.000152404		2e-08	-1.74746	0.78487	-1.32635	1.31782	2.36239
2.0025e-08	0.311081	0.267188	0.119645	0.0789991	0.0453855	7.62021e-05		2.0025e-08	0.0309189	-1.96927	-0.189896	0.417666	1.57275
2.005e-08	0.309746	0.273364	0.121054	0.0675603	0.0375997	7.62021e-05		2.005e-08	-0.0654937	-1.36398	0.229924	-0.0418892	-1.1937
2.0075e-08	0.308945	0.287361	0.119786	0.0825737	0.0436764	0		2.0075e-08	-0.103447	-0.0392365	-0.00109836	0.465312	1.0118
2.01e-08	0.303071	0.27748	0.118517	0.0745308	0.0368401	0		2.01e-08	-0.699688	-0.907914	-0.232944	0.448486	-1.41881
2.0125e-08	0.319626	0.296007	0.122041	0.0729223	0.0368401	0		2.0125e-08	1.17252	0.835729	0.703699	-0.256114	-1.39516
2.015e-08	0.308945	0.303417	0.120772	0.0754245	0.0372199	0		2.015e-08	0.046675	1.55844	0.471889	1.79111	-1.23482
2.0175e-08	0.311348	0.293125	0.114994	0.0718499	0.0423471	0		2.0175e-08	0.361729	0.650941	-0.864071	0.437413	0.635913
2.02e-08	0.312951	0.291066	0.110203	0.0743521	0.0393088	7.62021e-05		2.02e-08	0.588812	0.501327	-1.96206	-1.36646	-0.434163
2.0225e-08	0.304406	0.29436	0.110344	0.0756032	0.038929	0		2.0225e-08	-0.304238	0.845342	-1.85314	-0.57335	-0.546781
2.025e-08	0.301736	0.291066	0.119363	0.0793566	0.0383593	0		2.025e-08	-0.549562	0.581432	0.436759	2.37893	-0.728221
2.0275e-08	0.307076	0.282009	0.11584	0.0702413	0.0364603	7.62021e-05		2.0275e-08	0.0904742	-0.215685	-0.352804	-0.57118	-1.3905
2.03e-08	0.304673	0.275834	0.117531	0.0713137	0.0431067	7.62021e-05		2.03e-08	-0.125599	-0.747535	0.139523	0.429319	1.03736
2.0325e-08	0.301202	0.291478	0.118377	0.0741734	0.0434865	0		2.0325e-08	-0.460381	0.739468	0.424343	-0.161445	1.20036
2.035e-08	0.322029	0.275834	0.117531	0.0718499	0.0394987	7.62021e-05		2.035e-08	1.89721	-0.669754	0.292077	1.16897	-0.219129
2.0375e-08	0.311883	0.307534	0.119645	0.0695264	0.0396886	0		2.0375e-08	0.822905	2.30788	0.891128	0.904975	-0.125911
2.04e-08	0.293191	0.293536	0.113303	0.0759607	0.0404482	0		2.04e-08	-1.2014	1.05041	-0.602049	1.13239	0.17421
2.0425e-08	0.299599	0.284479	0.111612	0.07042	0.0393088	0		2.0425e-08	-0.440858	0.249677	-0.94625	-0.652122	-0.215068
2.045e-08	0.313218	0.272952	0.111612	0.0732797	0.0383593	0		2.045e-08	1.12212	-0.781813	-0.871676	0.560596	-0.535988
2.0475e-08	0.299332	0.300124	0.111471	0.0680965	0.0446259	0		2.0475e-08	-0.371957	1.78344	-0.832176	2.47624	1.76846
2.05e-08	0.305474	0.27501	0.11894	0.0713137	0.0394987	0		2.05e-08	0.360958	-0.512798	1.10145	-1.00413	-0.072977
2.0525e-08	0.283845	0.297242	0.11274	0.075067	0.0375997	0		2.0525e-08	-1.99871	1.59629	-0.367429	0.459881	-0.740843
2.055e-08	0.302537	0.297242	0.111048	0.0668454	0.0336118	0.000152404		2.055e-08	0.13294	1.63664	-0.714972	-0.345895	-2.17198
2.0575e-08	0.292924	0.279539	0.107244	0.0673816	0.0402583	7.62021e-05		2.0575e-08	-0.89006	0.0259645	-1.59198	-0.49182	0.277297
2.06e-08	0.311081	0.273775	0.113162	0.0698838	0.0393088	0		2.06e-08	1.18572	-0.472885	-0.0381796	0.480475	-0.0451963
2.0625e-08	0.29506	0.282009	0.118236	0.0725648	0.0393088	0		2.0625e-08	-0.554157	0.334877	1.30769	0.500817	-0.0210136
2.065e-08	0.300935	0.258954	0.11274	0.0711349	0.0391189	0		2.065e-08	0.151471	-1.78083	0.00510497	0.230289	-0.0663435
2.0675e-08	0.318291	0.28942	0.112176	0.0729223	0.0400684	0		2.0675e-08	2.1428	1.10669	-0.0618602	-0.0410285	0.305643
2.07e-08	0.299866	0.271305	0.111753	0.0659517	0.0377896	0.000152404		2.07e-08	0.130558	-0.549218	-0.0937103	-0.188193	-0.505473
2.0725e-08	0.287316	0.271305	0.112035	0.0697051	0.0467148	0.000228606		2.0725e-08	-1.22645	-0.510642	0.0516157	2.04109	2.79361
2.075e-08	0.296128	0.261013	0.113867	0.07042	0.0412077	0		2.075e-08	-0.190105	-1.43704	0.588021	-0.609364	0.797442
2.0775e-08	0.304406	0.272128	0.110344	0.0748883	0.0381694	0		2.0775e-08	0.787724	-0.356319	-0.227011	1.03932	-0.294678
2.08e-08	0.285981	0.286126	0.115135	0.0729223	0.0391189	7.62021e-05		2.08e-08	-1.23182	0.996525	1.05821	0.975659	0.0784365
2.0825e-08	0.299065	0.271305	0.101043	0.0705987	0.0358906	0		2.0825e-08	0.286626	-0.356619	-2.43537	0.953503	-1.08619
2.085e-08	0.292924	0.276245	0.113444	0.0682752	0.0379795	7.62021e-05		2.085e-08	-0.355015	0.14641	0.779451	0.763222	-0.293358
2.0875e-08	0.286782	0.283656	0.115135	0.0686327	0.0375997	0		2.0875e-08	-0.997664	0.882601	1.28331	2.71527	-0.409765
2.09e-08	0.280374	0.270482	0.106962	0.0695264	0.0368401	0		2.09e-08	-1.67138	-0.318737	-0.719509	0.0862617	-0.666603
2.0925e-08	0.284379	0.277069	0.106821	0.0641644	0.0402583	7.62021e-05		2.0925e-08	-1.17234	0.340534	-0.682899	-0.443231	0.619553
2.095e-08	0.285981	0.273775	0.106116	0.0718499	0.0366502	0		2.095e-08	-0.94369	0.0688287	-0.790033	-0.468017	-0.69015
2.0975e-08	0.297997	0.265953	0.104707	0.0614835	0.0379795	0		2.0975e-08	0.460751	-0.630798	-1.07752	-0.155137	-0.174941
2.1e-08	0.292924	0.283244	0.107103	0.0739946	0.0412077	0.000228606		2.1e-08	-0.0632958	1.04064	-0.393634	0.369778	1.04442
2.1025e-08	0.301202	0.266776	0.115417	0.063092	0.042537	0		2.1025e-08	0.921062	-0.476753	1.80637	-0.586096	1.56184
2.105e-08	0.302804	0.270482	0.110344	0.0693476	0.0347512	0.000228606		2.105e-08	1.15156	-0.0881164	0.581351	-0.442432	-1.30161
2.1075e-08	0.291322	0.2676	0.109921	0.0718499	0.0347512	0		2.1075e-08	-0.0989794	-0.322588	0.54607	0.46539	-1.279
2.11e-08	0.290788	0.26266	0.0979425	0.0680965	0.03703	0		2.11e-08	-0.111099	-0.752498	-2.45829	1.1203	-0.409588
2.1125e-08	0.285447	0.271305	0.109639	0.0666667	0.0375997	0		2.1125e-08	-0.668238	0.105031	0.619699	-0.606275	-0.174422
2.115e-08	0.269693	0.259366	0.10668	0.0670241	0.0374098	0		2.115e-08	-2.4078	-0.989367	-0.0695254	0.261694	-0.221649
2.1175e-08	0.293992	0.288184	0.108653	0.0693476	0.0385492	0		2.1175e-08	0.397832	1.78474	0.511483	1.5157	0.226234
2.12e-08	0.297463	0.281597	0.105552	0.0673816	0.0357007	0		2.12e-08	0.840952	1.19847	-0.216359	0.252624	-0.812062
2.1225e-08	0.285714	0.28942	0.111612	0.0718499	0.0423471	0		2.1225e-08	-0.446039	1.98156	1.42244	0.312048	1.69107
2.125e-08	0.276368	0.2676	0.101747	0.0675603	0.0374098	0		2.125e-08	-1.46154	-0.0552769	-1.05818	-0.44219	-0.12797
2.1275e-08	0.283311	0.273775	0.103016	0.07042	0.0311432	0		2.1275e-08	-0.623759	0.57103	-0.659107	1.37402	-2.44698
2.13e-08	0.28251	0.280774	0.10978	0.0679178	0.0427269	0		2.13e-08	-0.667333	1.27667	1.16757	-0.154021	1.90795
2.1325e-08	0.279306	0.259366	0.104284	0.0716711	0.0374098	0		2.1325e-08	-0.985142	-0.726261	-0.188368	-0.826456	-0.0578612
2.135e-08	0.29239	0.282009	0.107948	0.0636282	0.0374098	7.62021e-05		2.135e-08	0.55545	1.47265	0.836261	-1.11343	-0.0345417
2.1375e-08	0.285447	0.265953	0.105271	0.0664879	0.0322826	7.62021e-05		2.1375e-08	-0.189033	-0.0219786	0.2106	1.65828	-1.93413
2.14e-08	0.277437	0.271717	0.108794	0.0664879	0.0347512	0		2.14e-08	-1.05673	0.567033	1.20139	0.553653	-0.985809
2.1425e-08	0.259279	0.253602	0.101043	0.0705987	0.0406381	0		2.1425e-08	-3.08633	-1.12752	-0.751368	0.266967	1.24813
2.145e-08	0.281709	0.261013	0.108653	0.0652368	0.0375997	0.000152404		2.145e-08	-0.473217	-0.380863	1.30983	1.75292	0.130125
2.1475e-08	0.313218	0.247839	0.10217	0.0639857	0.0343714	0		2.1475e-08	3.18361	-1.60542	-0.315983	1.55342	-1.06122
2.15e-08	0.293458	0.268835	0.110485	0.0702413	0.0355108	0		2.15e-08	0.968811	0.444528	1.93552	-1.98579	-0.609751
2.1525e-08	0.28972	0.266776	0.101747	0.0677391	0.0393088	7.62021e-05		2.1525e-08	0.588537	0.285206	-0.286633	0.848376	0.844455
2.155e-08	0.273431	0.254837	0.103861	0.0654155	0.0317129	0		2.155e-08	-1.23313	-0.823254	0.339242	1.60271	-1.99702
2.1575e-08	0.281976	0.256896	0.106962	0.0675603	0.0347512	0		2.1575e-08	-0.204682	-0.588287	1.2263	0.138815	-0.828459
2.16e-08	0.280107	0.270893	0.10062	0.0661305	0.0393088	0		2.16e-08	-0.372055	0.795166	-0.374423	0.719399	0.916006
2.1625e-08	0.289987	0.25072	0.109639	0.0654155	0.0301937	0		2.1625e-08	0.811987	-1.10803	2.07656	-0.13871	-2.50715
2.165e-08	0.275834	0.274599	0.0994927	0.0675603	0.0368401	7.62021e-05		2.165e-08	-0.769202	1.22867	-0.533495	-0.25634	0.0293157
2.1675e-08	0.286248	0.262248	0.0996336	0.0648794	0.0355108	0		2.1675e-08	0.477725	0.0768335	-0.426968	-1.94919	-0.451145
2.17e-08	0.278238	0.237546	0.0980834	0.0652368	0.0394987	7.62021e-05		2.17e-08	-0.397973	-2.26811	-0.768592	1.17165	1.08331
2.1725e-08	0.29506	0.248662	0.0999154	0.0580876	0.0391189	0.000152404		2.1725e-08	1.59042	-1.15914	-0.213591	-0.0414715	0.963117
2.175e-08	0.301202	0.254426	0.0997745	0.0695264	0.0362704	0		2.175e-08	2.34829	-0.565613	-0.181785	-0.906528	-0.0947452
2.1775e-08	0.278772	0.262248	0.100056	0.0695264	0.035131	0		2.1775e-08	-0.194452	0.227719	-0.0376986	0.951858	-0.504892
2.18e-08	0.284913	0.260189	0.0956877	0.0654155	0.0341815	7.62021e-05		2.18e-08	0.563008	0.0662235	-1.13272	0.393547	-0.843554
2.1825e-08	0.281976	0.27254	0.100761	0.0693476	0.0404482	7.62021e-05		2.1825e-08	0.27083	1.29951	0.28838	-0.342686	1.56414
2.185e-08	0.272363	0.252367	0.0941375	0.0641644	0.0347512	0		2.185e-08	-0.794957	-0.616706	-1.41187	0.154692	-0.582212
2.1875e-08	0.282243	0.266365	0.100338	0.0659517	0.0355108	0		2.1875e-08	0.396734	0.777487	0.313823	-0.539827	-0.27027
2.19e-08	0.291589	0.25072	0.104425	0.0650581	0.042537	0		2.19e-08	1.52818	-0.702623	1.47769	-0.174434	2.43359
2.1925e-08	0.268625	0.259366	0.0934329	0.0586238	0.0336118	0		2.1925e-08	-1.08877	0.17379	-1.39966	1.69781	-0.950441
2.195e-08	0.287049	0.264306	0.098788	0.0580876	0.0341815	7.62021e-05		2.195e-08	1.09766	0.691391	0.105344	2.37718	-0.710709
2.1975e-08	0.284913	0.241663	0.0986471	0.0647006	0.0358906	7.62021e-05		2.1975e-08	0.897358	-1.4729	0.136194	-0.0946838	-0.0347255
2.2e-08	0.282777	0.27254	0.0939966	0.0561215	0.0410179	0		2.2e-08	0.696683	1.56844	-1.04733	0.761692	1.95107
2.2025e-08	0.272897	0.258131	0.100479	0.0616622	0.0377896	0		2.2025e-08	-0.405787	0.203382	0.767149	-0.872953	0.73831
2.205e-08	0.274232	0.251544	0.0931511	0.0688114	0.0372199	0		2.205e-08	-0.203551	-0.401357	-1.142	0.385276	0.54307
2.2075e-08	0.280908	0.255661	0.0924464	0.0613047	0.0360805	0		2.2075e-08	0.621444	0.0370496	-1.26607	0.307589	0.128782
2.21e-08	0.259012	0.262248	0.0921646	0.0586238	0.0375997	0		2.21e-08	-1.88557	0.717181	-1.27622	-2.09398	0.735018
2.2125e-08	0.257944	0.233429	0.100902	0.0618409	0.0358906	7.62021e-05		2.2125e-08	-1.96478	-2.06049	1.15756	0.19586	0.101082
2.215e-08	0.283044	0.256484	0.0975197	0.0666667	0.03703	0		2.215e-08	1.0131	0.228938	0.309033	1.72978	0.562076
2.2175e-08	0.281175	0.258543	0.0986471	0.0625559	0.0326624	0		2.2175e-08	0.842149	0.467559	0.683413	-0.275681	-1.09689
2.22e-08	0.266489	0.248662	0.0958286	0.0527256	0.0332321	7.62021e-05		2.22e-08	-0.828705	-0.462449	-0.0148261	-0.669634	-0.855741
2.2225e-08	0.267824	0.273775	0.0906144	0.0575514	0.0343714	0		2.2225e-08	-0.626172	2.03487	-1.36766	-0.0305779	-0.394479
2.225e-08	0.277437	0.25072	0.0999154	0.0616622	0.0387391	0		2.225e-08	0.546494	-0.187287	1.2347	0.159729	1.31374
2.2275e-08	0.279039	0.239193	0.089487	0.061126	0.0391189	0		2.2275e-08	0.781456	-1.28168	-1.54458	-0.280734	1.48397
2.23e-08	0.263017	0.27254	0.096956	0.061126	0.0387391	0		2.23e-08	-1.05135	2.02894	0.562735	2.07547	1.36071
2.2325e-08	0.261415	0.233429	0.0918828	0.0636282	0.03703	7.62021e-05		2.2325e-08	-1.1937	-1.77633	-0.758848	0.144736	0.722754
2.235e-08	0.247263	0.241663	0.0927283	0.061126	0.0404482	0.000152404		2.235e-08	-2.81115	-0.931097	-0.461338	-0.886146	2.06952
2.2375e-08	0.273965	0.24331	0.0921646	0.0580876	0.0347512	0.000152404		2.2375e-08	0.3735	-0.732956	-0.550043	-0.289042	-0.114793
2.24e-08	0.27984	0.238781	0.0913191	0.0609473	0.0339916	7.62021e-05		2.24e-08	1.1116	-1.14279	-0.716551	-0.642975	-0.387315
2.2425e-08	0.278238	0.256072	0.0920237	0.0620197	0.0372199	0		2.2425e-08	0.970193	0.597437	-0.456962	0.0465298	0.888015
2.245e-08	0.266222	0.261013	0.0892052	0.0613047	0.0324725	0		2.245e-08	-0.398828	1.12193	-1.16771	-0.0807145	-0.93378
2.2475e-08	0.278238	0.249485	0.0934329	0.0614835	0.0358906	7.62021e-05		2.2475e-08	1.06455	0.0215502	0.0637458	0.565475	0.416992
2.25e-08	0.272897	0.247427	0.0985062	0.0607685	0.035131	0		2.25e-08	0.481375	-0.145132	1.53172	1.16752	0.143889
2.2525e-08	0.264619	0.227666	0.0875141	0.0579088	0.03703	7.62021e-05		2.2525e-08	-0.449689	-2.06227	-1.44112	-0.00889608	0.90589
2.255e-08	0.261682	0.245368	0.0944194	0.0566577	0.0339916	7.62021e-05		2.255e-08	-0.750958	-0.27584	0.535591	1.82713	-0.255769
2.2575e-08	0.26008	0.251544	0.0966742	0.0634495	0.0309533	7.62021e-05		2.2575e-08	-0.894832	0.371868	1.22734	0.144952	-1.41939
2.26e-08	0.277437	0.255249	0.0899098	0.0600536	0.0341815	0		2.26e-08	1.20525	0.775734	-0.583977	0.107368	-0.137899
2.2625e-08	0.26008	0.257308	0.096956	0.0614835	0.0319028	7.62021e-05		2.2625e-08	-0.803843	1.01687	1.44011	-1.85656	-1.00657
2.265e-08	0.25474	0.26513	0.0928692	0.0570152	0.0357007	7.62021e-05		2.265e-08	-1.39143	1.83026	0.369664	-0.978625	0.500105
2.2675e-08	0.281709	0.264718	0.0875141	0.0563003	0.0298139	0		2.2675e-08	1.85316	1.82717	-1.05722	0.407094	-1.78189
2.27e-08	0.261148	0.251544	0.0869504	0.053798	0.0343714	0		2.27e-08	-0.540407	0.555738	-1.15046	0.599377	0.0241398
2.2725e-08	0.262483	0.234253	0.0956877	0.0550492	0.0349411	0		2.2725e-08	-0.336113	-1.12708	1.35544	0.423328	0.269503
2.275e-08	0.25741	0.230136	0.0930101	0.0530831	0.0372199	0		2.275e-08	-0.893546	-1.50131	0.673034	0.661971	1.18589
2.2775e-08	0.265421	0.247427	0.0893461	0.0557641	0.0341815	0		2.2775e-08	0.104882	0.256044	-0.287842	1.9174	0.0155118
2.28e-08	0.27984	0.24331	0.0848365	0.0629133	0.0343714	0		2.28e-08	1.86772	-0.117882	-1.48868	0.215224	0.112035
2.2825e-08	0.271829	0.245368	0.0897689	0.0543342	0.0341815	0		2.2825e-08	0.960383	0.123548	-0.0402958	-0.704009	0.0592545
2.285e-08	0.275834	0.245368	0.0955468	0.0575514	0.0353209	7.62021e-05		2.285e-08	1.48446	0.159799	1.64947	-1.16196	0.529664
2.2875e-08	0.261415	0.239605	0.0866685	0.0500447	0.0332321	0		2.2875e-08	-0.18934	-0.379709	-0.784452	-2.73545	-0.271179
2.29e-08	0.268358	0.242075	0.0882187	0.0563003	0.0355108	0.000152404		2.29e-08	0.685314	-0.096914	-0.283801	-0.3152	0.648948
2.2925e-08	0.282243	0.247015	0.0832864	0.0645219	0.0311432	0		2.2925e-08	2.39087	0.433395	-1.61244	0.435402	-1.05249
2.295e-08	0.265688	0.25072	0.0892052	0.0579088	0.0292442	0		2.295e-08	0.458466	0.840799	0.123361	-1.93439	-1.78166
2.2975e-08	0.258745	0.235488	0.0803269	0.0550492	0.0355108	0		2.2975e-08	-0.326374	-0.648696	-2.32556	1.8019	0.715799
2.3e-08	0.256075	0.234253	0.0869504	0.0529044	0.0322826	0		2.3e-08	-0.600759	-0.736976	-0.386936	-0.0584608	-0.539077
2.3025e-08	0.26008	0.245368	0.0906144	0.05916	0.0330422	0		2.3025e-08	-0.0755612	0.413838	0.716427	1.72457	-0.217091
2.305e-08	0.262483	0.252779	0.0992108	0.0546917	0.031523	7.62021e-05		2.305e-08	0.25814	1.19421	3.22403	-0.0472428	-0.797637
2.3075e-08	0.259546	0.258131	0.0866685	0.0552279	0.0330422	7.62021e-05		2.3075e-08	-0.0487662	1.76882	-0.277077	-0.838993	-0.174212
2.31e-08	0.256876	0.236311	0.0923055	0.0595174	0.0345613	0		2.31e-08	-0.324123	-0.388334	1.39211	-0.0367713	0.450175
2.3125e-08	0.259546	0.228901	0.0890643	0.0512958	0.0360805	0		2.3125e-08	0.0419916	-1.09858	0.532735	1.7073	1.07553
2.315e-08	0.261949	0.24331	0.082159	0.0557641	0.0328523	0		2.315e-08	0.376474	0.387675	-1.37551	-0.167966	-0.185486
2.3175e-08	0.271829	0.238781	0.082159	0.0629133	0.0288644	7.62021e-05		2.3175e-08	1.61142	-0.0326487	-1.31382	-0.493078	-1.7508
2.32e-08	0.259813	0.237546	0.0901917	0.0555853	0.0360805	0		2.32e-08	0.210446	-0.121433	1.04818	0.265929	1.14272
2.3225e-08	0.256609	0.229724	0.0866685	0.0566577	0.0319028	7.62021e-05		2.3225e-08	-0.130348	-0.875304	0.102616	0.932226	-0.499789
2.325e-08	0.258745	0.247427	0.0863867	0.0570152	0.0332321	7.62021e-05		2.325e-08	0.172556	0.948035	0.0849408	-0.622612	0.0514526
2.3275e-08	0.25741	0.236311	0.0828636	0.0566577	0.0366502	0.000228606		2.3275e-08	0.0567208	-0.139263	-0.8648	0.138563	1.43735
2.33e-08	0.260881	0.24578	0.0904735	0.0561215	0.0301937	7.62021e-05		2.33e-08	0.521307	0.85419	1.38718	0.1429	-1.11943
2.3325e-08	0.251001	0.236723	0.0856821	0.051832	0.0288644	0		2.3325e-08	-0.627734	-0.0265428	0.0706882	1.04884	-1.63046
2.335e-08	0.266756	0.246604	0.0882187	0.0534406	0.0320927	0		2.335e-08	1.32301	1.01005	0.865268	0.48368	-0.318702
2.3375e-08	0.260347	0.254426	0.0862458	0.0520107	0.0326624	0		2.3375e-08	0.593053	1.83944	0.358805	-0.844259	-0.0695255
2.34e-08	0.257677	0.219432	0.0851184	0.054513	0.0307634	7.62021e-05		2.34e-08	0.31495	-1.67433	0.0955684	-1.46098	-0.809394
2.3425e-08	0.26008	0.224372	0.0830045	0.0480786	0.033422	7.62021e-05		2.3425e-08	0.651591	-1.1384	-0.45418	0.210068	0.277608
2.345e-08	0.2502	0.238781	0.0841319	0.0559428	0.0279149	0		2.345e-08	-0.501805	0.360487	-0.0653909	0.26151	-1.91164
2.3475e-08	0.252069	0.251544	0.0841319	0.0566577	0.029624	0		2.3475e-08	-0.230215	1.69408	-0.00319693	0.265157	-1.20529
2.35e-08	0.251535	0.242075	0.0811725	0.058445	0.0292442	7.62021e-05		2.35e-08	-0.25035	0.76716	-0.801602	-0.162171	-1.33775
2.3525e-08	0.256342	0.229312	0.0818771	0.0543342	0.0349411	0		2.3525e-08	0.378845	-0.496646	-0.535563	-0.111458	0.974903
2.355e-08	0.251802	0.219432	0.0841319	0.054513	0.0292442	7.62021e-05		2.355e-08	-0.128519	-1.46869	0.182787	-0.82862	-1.29754
2.3575e-08	0.246195	0.244133	0.0804679	0.0554066	0.0307634	0		2.3575e-08	-0.766795	1.08492	-0.824822	2.1037	-0.665136
2.36e-08	0.255274	0.238781	0.0830045	0.051832	0.0343714	7.62021e-05		2.36e-08	0.383829	0.574711	-0.023016	1.19471	0.810872
2.3625e-08	0.260614	0.21655	0.0813134	0.0552279	0.0303836	0		2.3625e-08	1.08012	-1.66044	-0.456407	1.29478	-0.777375
2.365e-08	0.245127	0.228489	0.0834273	0.0557641	0.0298139	0		2.365e-08	-0.764713	-0.406004	0.223817	0.285921	-0.987136
2.3675e-08	0.249399	0.236311	0.0852593	0.0546917	0.0328523	0		2.3675e-08	-0.198782	0.429111	0.822989	-0.0495646	0.261726
2.37e-08	0.243525	0.231783	0.0841319	0.0512958	0.0320927	0		2.37e-08	-0.872329	0.0010503	0.554278	0.290782	-0.0244318
2.3725e-08	0.241121	0.234664	0.0822999	0.0504021	0.033422	0		2.3725e-08	-1.1223	0.33149	0.0774643	0.196283	0.534963
2.375e-08	0.255274	0.216962	0.082159	0.0493298	0.0332321	0		2.375e-08	0.65382	-1.44808	0.0971862	1.07051	0.479424
2.3775e-08	0.259813	0.230548	0.0818771	0.0532618	0.0330422	0		2.3775e-08	1.25488	-0.0201399	0.0751377	1.07341	0.423745
2.38e-08	0.240854	0.241663	0.0724352	0.0514745	0.0358906	0		2.38e-08	-1.02385	1.15621	-2.65149	0.00749282	1.60151
2.3825e-08	0.246195	0.244957	0.0814543	0.0530831	0.0298139	0.000152404		2.3825e-08	-0.325062	1.53049	0.0718273	0.543653	-0.845478
2.385e-08	0.240053	0.23837	0.0741263	0.0573727	0.0328523	7.62021e-05		2.385e-08	-1.03492	0.889257	-2.03641	0.837496	0.410279
2.3875e-08	0.248064	0.218608	0.0808906	0.0539768	0.0320927	0.000152404		2.3875e-08	-0.00720457	-1.10864	0.0260961	1.08317	0.122302
2.39e-08	0.240587	0.237135	0.0806088	0.0482574	0.0319028	0		2.39e-08	-0.882113	0.833323	0.00299057	-0.330151	0.0658746
2.3925e-08	0.251802	0.228901	0.0810316	0.0527256	0.0311432	0		2.3925e-08	0.541363	0.0203338	0.189071	-1.1117	-0.222899
2.395e-08	0.228304	0.233841	0.0782131	0.0543342	0.0343714	0		2.395e-08	-2.3071	0.564796	-0.588677	-1.40594	1.11476
2.3975e-08	0.237383	0.220667	0.0776494	0.049151	0.0317129	7.62021e-05		2.3975e-08	-1.14588	-0.759578	-0.696997	-0.476343	0.0509713
2.4e-08	0.239519	0.203788	0.078354	0.0461126	0.0294341	0		2.4e-08	-0.839094	-2.46869	-0.427588	-0.476507	-0.859379
2.4025e-08	0.243525	0.21902	0.0832864	0.0455764	0.029624	0		2.4025e-08	-0.301312	-0.861219	1.10463	0.799873	-0.761664
2.405e-08	0.263818	0.214903	0.0835682	0.0482574	0.0307634	0		2.405e-08	2.24847	-1.25295	1.25009	0.604201	-0.275234
2.4075e-08	0.24753	0.212433	0.082018	0.0502234	0.035131	0		2.4075e-08	0.281364	-1.47486	0.84729	-0.0843752	1.53427
2.41e-08	0.26008	0.224784	0.0752537	0.0625559	0.0303836	7.62021e-05		2.41e-08	1.87752	-0.161817	-1.11951	0.260176	-0.390047
2.4125e-08	0.24753	0.223549	0.0724352	0.0521895	0.0300038	7.62021e-05		2.4125e-08	0.369772	-0.255303	-1.9072	0.0626652	-0.525565
2.415e-08	0.237116	0.228077	0.0734216	0.0548704	0.0282947	0		2.415e-08	-0.875666	0.248998	-1.55365	-0.827047	-1.20714
2.4175e-08	0.255007	0.217373	0.0729989	0.0470063	0.033422	0		2.4175e-08	1.38484	-0.827471	-1.62329	-0.878135	0.919434
2.42e-08	0.241121	0.228489	0.0758174	0.0489723	0.0311432	0		2.42e-08	-0.29226	0.361479	-0.716826	0.556222	0.00358683
2.4225e-08	0.242724	0.22149	0.0818771	0.0539768	0.029624	0		2.4225e-08	-0.0497038	-0.331336	1.16937	-0.336376	-0.601116
2.425e-08	0.23765	0.218608	0.0797632	0.049866	0.0324725	7.62021e-05		2.425e-08	-0.635988	-0.596868	0.591667	-0.238454	0.592312
2.4275e-08	0.238718	0.233018	0.0735626	0.0552279	0.0279149	0		2.4275e-08	-0.459876	0.937651	-1.22352	1.30085	-1.26555
2.43e-08	0.251268	0.224784	0.0770857	0.0468275	0.0320927	0		2.43e-08	1.14455	0.114792	-0.0995465	-0.589844	0.477599
2.4325e-08	0.252069	0.202141	0.0737035	0.0539768	0.0330422	0		2.4325e-08	1.28879	-2.212	-1.06621	-0.791368	0.890493
2.435e-08	0.243258	0.21902	0.0814543	0.0502234	0.0313331	0		2.435e-08	0.235756	-0.41768	1.34363	-0.993531	0.205354
2.4375e-08	0.229372	0.214492	0.0729989	0.0552279	0.0353209	0		2.4375e-08	-1.45128	-0.85656	-1.16567	-0.597014	1.8752
2.44e-08	0.241121	0.228077	0.0694758	0.0530831	0.0313331	7.62021e-05		2.44e-08	0.0568982	0.597122	-2.18055	-0.49964	0.246483
2.4425e-08	0.224566	0.228901	0.0777903	0.0470063	0.0265856	7.62021e-05		2.4425e-08	-1.96614	0.718063	0.408416	-0.802591	-1.69953
2.445e-08	0.22964	0.206258	0.082159	0.0525469	0.029624	0.000152404		2.445e-08	-1.29016	-1.6171	1.8001	-0.555017	-0.420895
2.4475e-08	0.239786	0.225196	0.0741263	0.0448615	0.0300038	0		2.4475e-08	0.0210048	0.399746	-0.59262	0.39559	-0.24329
2.45e-08	0.234179	0.220667	0.07469	0.0489723	0.0309533	0.000152404		2.45e-08	-0.636975	-0.0403755	-0.362704	1.2981	0.171123
2.4525e-08	0.239519	0.219844	0.0731398	0.0505809	0.0254463	0		2.4525e-08	0.0746529	-0.0925373	-0.77972	1.19656	-2.09699
2.455e-08	0.220828	0.207493	0.0707441	0.0470063	0.0275351	0		2.455e-08	-2.22373	-1.355	-1.45724	-0.26521	-1.20962
2.4575e-08	0.23498	0.218197	0.0697576	0.0525469	0.0328523	7.62021e-05		2.4575e-08	-0.407588	-0.197309	-1.70406	-0.0667221	1.02283
2.46e-08	0.226168	0.214492	0.0749718	0.0468275	0.0258261	7.62021e-05		2.46e-08	-1.47019	-0.552879	-0.0458956	-0.322257	-1.88304
2.4625e-08	0.250734	0.205434	0.0742672	0.0525469	0.0324725	0		2.4625e-08	1.65659	-1.47212	-0.205094	-0.123633	0.906538
2.465e-08	0.238184	0.217373	0.0689121	0.0475424	0.0282947	0		2.465e-08	0.124121	-0.182026	-1.79767	0.93564	-0.815665
2.4675e-08	0.230708	0.217785	0.0748309	0.0525469	0.0320927	7.62021e-05		2.4675e-08	-0.772659	-0.104682	0.0837003	-1.09316	0.78975
2.47e-08	0.223231	0.20914	0.0665163	0.0505809	0.0320927	7.62021e-05		2.47e-08	-1.67078	-0.982312	-2.42683	-0.337003	0.810542
2.4725e-08	0.242724	0.223549	0.0698985	0.047185	0.0303836	7.62021e-05		2.4725e-08	0.825897	0.57155	-1.32634	0.624012	0.116544
2.475e-08	0.234179	0.227666	0.0680665	0.0486148	0.0301937	0		2.475e-08	-0.207094	1.04075	-1.83794	1.89227	0.0572843
2.4775e-08	0.24032	0.227666	0.0700395	0.0521895	0.0301937	0		2.4775e-08	0.610401	1.07548	-1.17135	1.33071	0.0774321
2.48e-08	0.251802	0.200082	0.0755355	0.0446828	0.0328523	0		2.48e-08	2.10296	-1.80699	0.590369	0.869534	1.21213
2.4825e-08	0.228838	0.21408	0.0725761	0.0548704	0.0288644	0		2.4825e-08	-0.75268	-0.292992	-0.271838	0.253989	-0.440068
2.485e-08	0.238451	0.215727	0.0752537	0.0477212	0.0313331	0		2.485e-08	0.50466	-0.0849418	0.617928	0.147728	0.616194
2.4875e-08	0.229372	0.204611	0.0725761	0.0541555	0.0258261	0		2.4875e-08	-0.600268	-1.22935	-0.158831	-0.316963	-1.67763
2.49e-08	0.223765	0.21161	0.0700395	0.0461126	0.0273452	0		2.49e-08	-1.26749	-0.454067	-0.893648	0.343818	-1.02007
2.4925e-08	0.231509	0.210375	0.0717306	0.0457551	0.0282947	0		2.4925e-08	-0.244664	-0.551682	-0.309757	-0.788467	-0.601271
2.495e-08	0.24032	0.215315	0.0720124	0.049151	0.0319028	7.62021e-05		2.495e-08	0.91499	0.00652085	-0.165282	-0.588827	0.938089
2.4975e-08	0.232043	0.213256	0.0741263	0.0525469	0.0294341	0		2.4975e-08	-0.0914103	-0.178515	0.553087	-0.18322	-0.0819718
2.5e-08	0.240053	0.210375	0.070885	0.0448615	0.029624	7.62021e-05		2.5e-08	0.968231	-0.451489	-0.406042	-1.06322	0.01801
2.5025e-08	0.22243	0.222725	0.067221	0.0495085	0.0311432	0		2.5025e-08	-1.22694	0.896773	-1.50053	-0.863596	0.679405
2.505e-08	0.235781	0.19473	0.0724352	0.0541555	0.027725	0		2.505e-08	0.51211	-2.05157	0.192687	1.03846	-0.744688
2.5075e-08	0.22777	0.219844	0.0749718	0.0493298	0.031523	0		2.5075e-08	-0.463889	0.658102	1.04726	1.65383	0.880811
2.51e-08	0.231509	0.224784	0.0683484	0.0482574	0.0286745	0.000152404		2.51e-08	0.0543225	1.21929	-0.982588	-0.366333	-0.304355
2.5125e-08	0.208011	0.21408	0.065389	0.0511171	0.0303836	0		2.5125e-08	-2.89658	0.1108	-1.86159	-0.424371	0.439147
2.515e-08	0.221362	0.213668	0.0735626	0.047185	0.0263957	0		2.515e-08	-1.15395	0.100444	0.773925	-0.534461	-1.23135
2.5175e-08	0.239786	0.202141	0.0721533	0.047185	0.031523	7.62021e-05		2.5175e-08	1.23845	-1.09862	0.385037	-1.52697	0.962788
2.52e-08	0.223498	0.226842	0.0713078	0.0504021	0.0273452	0		2.52e-08	-0.79766	1.57753	0.173575	0.54309	-0.790631
2.5225e-08	0.227503	0.211198	0.0641206	0.0407507	0.0275351	7.62021e-05		2.5225e-08	-0.243913	-0.0631915	-2.04931	-0.346644	-0.690823
2.525e-08	0.23231	0.221079	0.0686302	0.0434316	0.0248766	0		2.525e-08	0.412989	1.02916	-0.56465	-0.509609	-1.80232
2.5275e-08	0.229907	0.196377	0.072717	0.049151	0.0265856	0		2.5275e-08	0.148268	-1.58594	0.789075	0.317427	-1.05662
2.53e-08	0.229105	0.190613	0.067221	0.051832	0.0282947	0		2.53e-08	0.0882133	-2.17235	-0.903817	0.572078	-0.309795
2.5325e-08	0.236048	0.214492	0.0651071	0.0448615	0.0275351	0		2.5325e-08	1.02024	0.424121	-1.52337	2.02911	-0.614238
2.535e-08	0.223498	0.22396	0.0683484	0.0464701	0.027725	0		2.535e-08	-0.546007	1.47554	-0.436103	0.768775	-0.514115
2.5375e-08	0.238985	0.204199	0.0711669	0.0452189	0.0248766	7.62021e-05		2.5375e-08	1.48327	-0.615755	0.518702	0.29108	-1.71119
2.54e-08	0.215487	0.225196	0.0735626	0.0496872	0.0279149	0		2.54e-08	-1.4909	1.67727	1.34057	-0.869612	-0.394638
2.5425e-08	0.236849	0.203788	0.0628523	0.0495085	0.0290543	0		2.5425e-08	1.29549	-0.594424	-2.03247	-1.8756	0.11187
2.545e-08	0.220561	0.203376	0.0703213	0.0441466	0.0267755	0		2.545e-08	-0.756031	-0.605975	0.414693	1.32145	-0.843807
2.5475e-08	0.218425	0.215727	0.0598929	0.0430742	0.0273452	7.62021e-05		2.5475e-08	-0.989248	0.759294	-2.87767	-0.895006	-0.580916
2.55e-08	0.227503	0.202141	0.0648253	0.0486148	0.0279149	0		2.55e-08	0.221489	-0.673744	-1.24118	0.677083	-0.31764
2.5525e-08	0.221095	0.215727	0.0622886	0.0462913	0.0322826	7.62021e-05		2.5525e-08	-0.562153	0.826792	-2.0045	-0.0685381	1.57541
2.555e-08	0.224299	0.20914	0.070885	0.0478999	0.0271553	0		2.555e-08	-0.107202	0.14828	0.817283	0.0818058	-0.605317
2.5575e-08	0.220294	0.194319	0.0651071	0.0457551	0.0326624	0		2.5575e-08	-0.582217	-1.42223	-0.991439	-0.296472	1.78
2.56e-08	0.238985	0.198024	0.0675028	0.0475424	0.029624	0		2.56e-08	1.87361	-0.989022	-0.164621	1.54783	0.494183
2.5625e-08	0.230441	0.206669	0.0667982	0.0523682	0.0244968	7.62021e-05		2.5625e-08	0.812471	-0.0198658	-0.338535	0.269038	-1.69272
2.565e-08	0.225634	0.208728	0.0680665	0.0466488	0.0294341	0		2.565e-08	0.233305	0.236364	0.125889	0.101575	0.451924
2.5675e-08	0.237383	0.192672	0.0704622	0.0432529	0.0275351	7.62021e-05		2.5675e-08	1.79626	-1.4729	0.956887	0.358693	-0.346941
2.57e-08	0.217623	0.219432	0.0667982	0.049151	0.0300038	0		2.57e-08	-0.720116	1.46524	-0.177204	0.243997	0.737128
2.5725e-08	0.218692	0.203376	0.0698985	0.0452189	0.026016	0.000152404		2.5725e-08	-0.540256	-0.245716	0.884212	0.288707	-0.964684
2.575e-08	0.223765	0.208316	0.0614431	0.0453977	0.0313331	0		2.575e-08	0.159388	0.324364	-1.81232	-2.1193	1.35135
2.5775e-08	0.209346	0.205434	0.0659526	0.0427167	0.0298139	0		2.5775e-08	-1.67057	0.0438185	-0.291596	-0.529483	0.714774
2.58e-08	0.226702	0.214492	0.0713078	0.0439678	0.0290543	0		2.58e-08	0.624823	1.06324	1.50849	-0.699785	0.405871
2.5825e-08	0.214686	0.198024	0.0636979	0.0478999	0.0298139	0		2.5825e-08	-0.895192	-0.698223	-0.921708	-0.496097	0.754409
2.585e-08	0.215487	0.19473	0.0656708	0.0389634	0.0294341	0		2.585e-08	-0.749952	-1.02523	-0.2243	0.618637	0.60958
2.5875e-08	0.223231	0.21408	0.0667982	0.0443253	0.0279149	0		2.5875e-08	0.29934	1.11905	0.197877	-0.57037	-0.0297778
2.59e-08	0.216288	0.214903	0.067221	0.042538	0.0263957	0		2.59e-08	-0.563361	1.24258	0.390024	-0.205049	-0.670173
2.5925e-08	0.223765	0.201317	0.06708	0.0489723	0.0273452	0		2.5925e-08	0.452696	-0.20903	0.397547	0.591145	-0.239004
2.595e-08	0.222163	0.207493	0.0667982	0.0416443	0.0244968	0		2.595e-08	0.285602	0.499179	0.358669	-0.0640826	-1.45863
2.5975e-08	0.216021	0.194319	0.0676437	0.0441466	0.0265856	7.62021e-05		2.5975e-08	-0.474509	-0.910128	0.690484	0.302905	-0.531614
2.6e-08	0.241389	0.202964	0.0593292	0.0459339	0.0298139	7.62021e-05		2.6e-08	2.88139	0.0691417	-1.99475	-0.893926	0.893057
2.6025e-08	0.218158	0.198024	0.063416	0.0455764	0.029624	0		2.6025e-08	-0.112769	-0.439877	-0.596346	2.92953	0.830098
2.605e-08	0.214686	0.198847	0.067221	0.0457551	0.0244968	0		2.605e-08	-0.525654	-0.317275	0.712203	-1.45792	-1.3867
2.6075e-08	0.208278	0.195965	0.0648253	0.0468275	0.0317129	7.62021e-05		2.6075e-08	-1.32386	-0.601422	-0.0264588	-0.0628039	1.78142
2.61e-08	0.213885	0.202964	0.0618658	0.0461126	0.0282947	0		2.61e-08	-0.548627	0.199743	-0.95368	0.739205	0.308469
2.6125e-08	0.227503	0.208728	0.0644025	0.0403932	0.0273452	0		2.6125e-08	1.27821	0.866225	-0.0615553	0.67471	-0.08745
2.615e-08	0.202403	0.219844	0.0617249	0.0428954	0.026016	0		2.615e-08	-1.97361	2.12265	-0.897738	-0.041988	-0.650212
2.6175e-08	0.213351	0.194319	0.0589064	0.0466488	0.0254463	7.62021e-05		2.6175e-08	-0.495917	-0.654417	-1.78288	1.8505	-0.881237
2.62e-08	0.226969	0.200906	0.0622886	0.0405719	0.0288644	7.62021e-05		2.62e-08	1.33482	0.103567	-0.607448	1.67795	0.635116
2.6225e-08	0.219493	0.186497	0.0622886	0.0462913	0.0262058	0		2.6225e-08	0.393726	-1.45316	-0.555855	-0.294326	-0.511518
2.625e-08	0.226435	0.202552	0.0605975	0.0373548	0.0309533	0.000152404		2.625e-08	1.34902	0.350377	-1.06831	1.11298	1.59098
2.6275e-08	0.227236	0.177439	0.0620068	0.0380697	0.0246867	7.62021e-05		2.6275e-08	1.49669	-2.39094	-0.547023	0.0641733	-1.14185
2.63e-08	0.218959	0.202552	0.0649662	0.0436104	0.0244968	7.62021e-05		2.63e-08	0.447834	0.415598	0.493581	-0.00241323	-1.20735
2.6325e-08	0.223765	0.208728	0.0636979	0.049866	0.0292442	0		2.6325e-08	1.12321	1.1313	0.121441	-0.836206	0.899428
2.635e-08	0.213351	0.197612	0.063416	0.0443253	0.0263957	0		2.635e-08	-0.209563	-0.0661272	0.0788563	0.631276	-0.335361
2.6375e-08	0.214686	0.210375	0.059611	0.0437891	0.0305735	0		2.6375e-08	0.00765522	1.37992	-1.14608	0.235284	1.52429
2.64e-08	0.221362	0.200906	0.059611	0.0443253	0.0254463	0		2.64e-08	0.931098	0.36341	-1.0958	-1.75584	-0.717046
2.6425e-08	0.199199	0.198436	0.0611612	0.0382484	0.0250665	0		2.6425e-08	-1.95905	0.121858	-0.524069	1.20138	-0.866464
2.645e-08	0.222964	0.213256	0.0651071	0.039857	0.0284846	0		2.645e-08	1.22655	1.79969	0.855776	0.0330803	0.661556
2.6475e-08	0.21522	0.200906	0.061584	0.0443253	0.0307634	0		2.6475e-08	0.242556	0.460937	-0.279589	0.627166	1.68826
2.65e-08	0.217089	0.200082	0.0628523	0.0394996	0.0262058	0		2.65e-08	0.53146	0.401881	0.199644	-1.59407	-0.30806
2.6525e-08	0.211482	0.197612	0.0608794	0.0450402	0.0275351	0		2.6525e-08	-0.17122	0.159425	-0.415747	1.32147	0.299006
2.655e-08	0.203204	0.195554	0.0601747	0.0423592	0.0309533	0		2.655e-08	-1.22952	-0.0376143	-0.603615	0.811568	1.83262
2.6575e-08	0.210681	0.194319	0.0673619	0.044504	0.0254463	0.000152404		2.6575e-08	-0.196299	-0.143248	1.88188	1.35331	-0.589518
2.66e-08	0.218959	0.18238	0.0593292	0.0427167	0.0267755	0		2.66e-08	0.944853	-1.44277	-0.789951	-0.434198	0.0186235
2.6625e-08	0.201602	0.218197	0.0660936	0.0411081	0.0243069	7.62021e-05		2.6625e-08	-1.32309	2.58534	1.55755	1.4403	-1.05926
2.665e-08	0.209613	0.196377	0.0605975	0.0368186	0.0227877	0		2.665e-08	-0.216749	0.182365	-0.258729	2.03996	-1.7168
2.6675e-08	0.214419	0.202141	0.0621477	0.039857	0.0281048	0		2.6675e-08	0.464207	0.858648	0.319628	0.358115	0.665892
2.67e-08	0.2251	0.198847	0.0572153	0.0441466	0.0224079	7.62021e-05		2.67e-08	1.92943	0.522878	-1.31061	1.01352	-1.85138
2.6725e-08	0.213084	0.185673	0.0582018	0.0416443	0.0218382	0		2.6725e-08	0.368088	-0.919352	-0.924771	1.61457	-2.08808
2.675e-08	0.20267	0.218197	0.0627114	0.0430742	0.0271553	0		2.675e-08	-0.981643	2.75487	0.665776	0.205439	0.299867
2.6775e-08	0.197597	0.196377	0.059611	0.0452189	0.0256362	0		2.6775e-08	-1.61976	0.342917	-0.343742	-0.144295	-0.359319
2.68e-08	0.208278	0.188555	0.0545378	0.0428954	0.027725	0		2.68e-08	-0.152096	-0.502473	-2.03177	-0.383	0.591847
2.6825e-08	0.2	0.185673	0.0553833	0.0393208	0.0269654	0		2.6825e-08	-1.21952	-0.794578	-1.69402	2.23707	0.271276
2.685e-08	0.207477	0.188555	0.05792	0.0407507	0.0250665	7.62021e-05		2.685e-08	-0.178708	-0.439667	-0.774864	-0.413443	-0.55951
2.6875e-08	0.216021	0.179909	0.0558061	0.0455764	0.0254463	7.62021e-05		2.6875e-08	1.0067	-1.38021	-1.45247	-0.48508	-0.371489
2.69e-08	0.215754	0.186085	0.0560879	0.039857	0.0256362	0		2.69e-08	1.01199	-0.654732	-1.30712	-0.950804	-0.268278
2.6925e-08	0.210147	0.190202	0.0589064	0.0421805	0.0218382	0		2.6925e-08	0.300506	-0.159975	-0.287245	-0.291099	-1.95297
2.695e-08	0.204806	0.196789	0.0629932	0.0416443	0.0269654	0		2.695e-08	-0.376179	0.613791	1.17267	-0.814197	0.364632
2.6975e-08	0.209079	0.200082	0.0560879	0.0428954	0.0210786	0		2.6975e-08	0.238129	1.01729	-1.16164	-1.28213	-2.26032
2.7e-08	0.212016	0.179498	0.0538331	0.0403932	0.0208887	0		2.7e-08	0.67368	-1.273	-1.89317	0.679302	-2.32904
2.7025e-08	0.213084	0.186908	0.0639797	0.039857	0.0248766	0		2.7025e-08	0.858186	-0.405546	1.66821	-0.693704	-0.518841
2.705e-08	0.19466	0.187732	0.0594701	0.0405719	0.027725	0		2.705e-08	-1.58275	-0.281242	0.156098	-1.16356	0.781277
2.7075e-08	0.213084	0.19473	0.0549605	0.0450402	0.0231675	0		2.7075e-08	0.939789	0.541527	-1.35983	0.407322	-1.25292
2.71e-08	0.2	0.192672	0.0591883	0.0430742	0.0233574	7.62021e-05		2.71e-08	-0.784376	0.340471	0.157378	0.164527	-1.15001
2.7125e-08	0.208545	0.191437	0.0576381	0.047185	0.0205089	0		2.7125e-08	0.40859	0.232332	-0.332556	-0.0789287	-2.41786
2.715e-08	0.198398	0.170852	0.059611	0.039857	0.0248766	0.000152404		2.715e-08	-0.921757	-2.06895	0.403783	1.72602	-0.429319
2.7175e-08	0.217089	0.196377	0.0563698	0.0382484	0.0284846	0		2.7175e-08	1.64447	0.855965	-0.677116	-1.36551	1.21906
2.72e-08	0.208011	0.196377	0.0572153	0.0403932	0.0279149	0.000152404		2.72e-08	0.457517	0.88806	-0.333343	-0.927188	0.980602
2.7225e-08	0.204539	0.179909	0.0569335	0.0421805	0.0262058	7.62021e-05		2.7225e-08	0.0279446	-0.950307	-0.38312	0.425922	0.226061
2.725e-08	0.201602	0.180321	0.0576381	0.0400357	0.0239271	0		2.725e-08	-0.329966	-0.872806	-0.0878272	-0.390855	-0.78774
2.7275e-08	0.205874	0.200906	0.0576381	0.0394996	0.0271553	0		2.7275e-08	0.288976	1.49942	-0.0390228	0.908491	0.693247
2.73e-08	0.192523	0.18979	0.0551015	0.039857	0.0307634	0		2.73e-08	-1.48233	0.266486	-0.880548	0.319326	2.3488
2.7325e-08	0.204272	0.190613	0.055947	0.0371761	0.0244968	7.62021e-05		2.7325e-08	0.151622	0.391754	-0.535821	-0.959901	-0.476425
2.735e-08	0.202937	0.172499	0.0552424	0.0400357	0.0267755	7.62021e-05		2.735e-08	0.0101295	-1.64177	-0.735741	-0.00182043	0.576724
2.7375e-08	0.196529	0.177851	0.0600338	0.0375335	0.022218	7.62021e-05		2.7375e-08	-0.821445	-1.00116	0.999634	1.36095	-1.4772
2.74e-08	0.200801	0.19473	0.0582018	0.0377122	0.0273452	0		2.74e-08	-0.200944	0.956426	0.403339	3.12982	0.87305
2.7425e-08	0.207477	0.184438	0.0553833	0.03521	0.0218382	0		2.7425e-08	0.747653	-0.18756	-0.54277	0.0606106	-1.61634
2.745e-08	0.199199	0.1655	0.0620068	0.0389634	0.0279149	0		2.745e-08	-0.339996	-2.32176	1.84652	-0.418765	1.17022
2.7475e-08	0.203738	0.201317	0.0505919	0.03521	0.0271553	0		2.7475e-08	0.318498	1.80594	-2.14292	0.0828822	0.842697
2.75e-08	0.206409	0.179909	0.0549605	0.0411081	0.0324725	0		2.75e-08	0.72281	-0.612878	-0.549118	0.296354	3.28872
2.7525e-08	0.199466	0.19226	0.0520011	0.0412869	0.0256362	0		2.7525e-08	-0.185096	0.833031	-1.55157	0.22062	0.186016
2.755e-08	0.210681	0.184438	0.0629932	0.0418231	0.0269654	0		2.755e-08	1.38697	-0.0322746	2.39912	-0.319259	0.811922
2.7575e-08	0.2	0.174557	0.0546787	0.0368186	0.0239271	0		2.7575e-08	-0.0331767	-1.13513	-0.507035	1.40315	-0.559788
2.76e-08	0.201869	0.174557	0.055947	0.0357462	0.0263957	0		2.76e-08	0.262103	-1.10495	-0.00816756	-0.531505	0.588195
2.7625e-08	0.195194	0.169617	0.0580609	0.0416443	0.0252564	0		2.7625e-08	-0.612475	-1.64253	0.793239	1.13622	0.0843888
2.765e-08	0.190921	0.18238	0.0560879	0.0350313	0.0244968	0		2.765e-08	-1.15899	-0.144958	0.137833	0.652714	-0.246035
2.7675e-08	0.195728	0.183203	0.0545378	0.0384272	0.0227877	7.62021e-05		2.7675e-08	-0.461155	-0.0193148	-0.368143	1.56747	-1.01282
2.77e-08	0.20267	0.172087	0.0500282	0.0373548	0.0235473	7.62021e-05		2.77e-08	0.530847	-1.26863	-1.93425	-1.42696	-0.646787
2.7725e-08	0.195995	0.189378	0.0567926	0.0371761	0.0239271	0		2.7725e-08	-0.346219	0.754393	0.534188	-2.20749	-0.454809
2.775e-08	0.202403	0.191025	0.0556652	0.0373548	0.0250665	7.62021e-05		2.775e-08	0.573783	0.975809	0.178068	0.286669	0.0869141
2.7775e-08	0.196529	0.183203	0.0538331	0.0343164	0.027725	7.62021e-05		2.7775e-08	-0.194485	0.104471	-0.432117	1.32196	1.32894
2.78e-08	0.209613	0.182791	0.0565107	0.0375335	0.0201291	0		2.78e-08	1.64566	0.0878129	0.577253	2.41812	-2.15241
2.7825e-08	0.189853	0.156443	0.0539741	0.0337802	0.0243069	0.000152404		2.7825e-08	-1.03575	-2.92721	-0.287871	-0.358334	-0.209702
2.785e-08	0.189853	0.172911	0.0586246	0.0334227	0.0246867	0		2.785e-08	-0.997296	-0.993523	1.43479	-1.084	-0.0168282
2.7875e-08	0.198932	0.187732	0.0532694	0.0380697	0.0262058	0		2.7875e-08	0.293544	0.752313	-0.448476	0.0716472	0.70257
2.79e-08	0.211215	0.171676	0.054115	0.0403932	0.0262058	0.000152404		2.79e-08	2.02855	-1.07655	-0.0964837	-0.714264	0.720844
2.7925e-08	0.193324	0.173322	0.0463641	0.0346738	0.026016	0		2.7925e-08	-0.402313	-0.855672	-2.85268	0.149417	0.651281
2.795e-08	0.20534	0.181556	0.0521421	0.037891	0.0231675	0.000152404		2.795e-08	1.29771	0.129762	-0.716918	0.483587	-0.649207
2.7975e-08	0.198665	0.158913	0.0521421	0.0319929	0.0250665	0		2.7975e-08	0.414263	-2.46851	-0.670811	1.4096	0.247825
2.8e-08	0.191722	0.179086	0.055947	0.0416443	0.0214584	0		2.8e-08	-0.507499	-0.095662	0.756283	0.917226	-1.40726
2.8025e-08	0.193858	0.16797	0.0511556	0.032529	0.0307634	0		2.8025e-08	-0.172858	-1.35764	-0.937291	-0.820674	2.92718
2.805e-08	0.202937	0.174969	0.0527057	0.0432529	0.0220281	7.62021e-05		2.805e-08	1.12474	-0.513638	-0.327835	0.937066	-1.10956
2.8075e-08	0.205607	0.174557	0.0552424	0.0359249	0.0212685	7.62021e-05		2.8075e-08	1.53497	-0.531408	0.642262	1.68912	-1.44583
2.81e-08	0.196262	0.183203	0.05031	0.0375335	0.0263957	0		2.81e-08	0.277367	0.506239	-1.10936	-0.173171	0.955412
2.8125e-08	0.18478	0.178263	0.05792	0.0368186	0.0265856	0		2.8125e-08	-1.27891	-0.0390224	1.71433	-0.492255	1.06212
2.815e-08	0.189853	0.179909	0.0580609	0.0387846	0.0275351	0		2.815e-08	-0.535522	0.183643	1.81427	-0.454606	1.52281
2.8175e-08	0.195728	0.173734	0.0493236	0.0369973	0.0263957	7.62021e-05		2.8175e-08	0.320374	-0.506954	-1.33509	-0.297615	1.01036
2.82e-08	0.180774	0.172911	0.0507328	0.0361037	0.0262058	7.62021e-05		2.82e-08	-1.72271	-0.573066	-0.773947	0.0985734	0.940099
2.8225e-08	0.199466	0.161383	0.0507328	0.0443253	0.0224079	0		2.8225e-08	0.919503	-1.89129	-0.72862	-0.401293	-0.815003
2.825e-08	0.195995	0.162618	0.0543968	0.0346738	0.0170908	0		2.825e-08	0.474915	-1.71768	0.662509	1.19271	-3.28276
2.8275e-08	0.183445	0.176204	0.0510147	0.0361037	0.0227877	0.000152404		2.8275e-08	-1.23732	-0.0971808	-0.534524	0.333125	-0.603609
2.83e-08	0.195995	0.173322	0.05031	0.0414656	0.024117	7.62021e-05		2.83e-08	0.553086	-0.404719	-0.748725	0.251394	0.0355264
2.8325e-08	0.203204	0.161795	0.0524239	0.0361037	0.0265856	7.62021e-05		2.8325e-08	1.59967	-1.72694	0.0753991	-1.45241	1.20928
2.835e-08	0.200534	0.168382	0.0497463	0.0382484	0.0254463	0.000152404		2.835e-08	1.26601	-0.924645	-0.866996	-1.5366	0.693556
2.8375e-08	0.19733	0.186085	0.0508737	0.0336014	0.0239271	0		2.8375e-08	0.857074	1.18464	-0.405758	-0.898665	-0.00116175
2.84e-08	0.187183	0.176204	0.0497463	0.0384272	0.0225978	7.62021e-05		2.84e-08	-0.52481	0.0541689	-0.777641	-0.37989	-0.607829
2.8425e-08	0.189319	0.178674	0.0472097	0.0396783	0.0218382	0		2.8425e-08	-0.187217	0.375088	-1.67244	-1.54944	-0.947794
2.845e-08	0.195728	0.179909	0.0500282	0.039857	0.0235473	7.62021e-05		2.845e-08	0.750047	0.551034	-0.583632	1.08387	-0.127535
2.8475e-08	0.188518	0.184026	0.0560879	0.0375335	0.0252564	0		2.8475e-08	-0.222762	1.06674	1.71103	0.39699	0.693977
2.85e-08	0.202136	0.160972	0.0514374	0.0318141	0.0243069	0		2.85e-08	1.72836	-1.62064	0.0298483	0.374417	0.264738
2.8525e-08	0.194126	0.176616	0.050451	0.0380697	0.0206988	0		2.8525e-08	0.642106	0.254274	-0.291937	-0.739357	-1.41818
2.855e-08	0.174633	0.174146	0.0479143	0.0341376	0.0271553	7.62021e-05		2.855e-08	-2.06085	-0.00711083	-1.19224	-1.8558	1.64332
2.8575e-08	0.189052	0.172911	0.0469278	0.0371761	0.0229776	0		2.8575e-08	0.00568937	-0.122988	-1.51656	-1.03093	-0.31013
2.86e-08	0.188518	0.183615	0.050451	0.030563	0.024117	0		2.86e-08	-0.0312085	1.17277	-0.157526	-0.386764	0.245124
2.8625e-08	0.195461	0.176204	0.0469278	0.039857	0.0235473	0		2.8625e-08	0.985726	0.326706	-1.43008	-0.53275	-0.00677071
2.865e-08	0.181308	0.156855	0.0474915	0.0336014	0.0216483	7.62021e-05		2.865e-08	-0.971654	-1.93454	-1.17576	0.966653	-0.887993
2.8675e-08	0.189586	0.162207	0.0489008	0.0373548	0.0239271	7.62021e-05		2.8675e-08	0.234475	-1.27163	-0.603989	0.394576	0.207518
2.87e-08	0.189586	0.181968	0.0545378	0.0323503	0.0250665	7.62021e-05		2.87e-08	0.27293	1.10116	1.55552	-0.78978	0.764806
2.8725e-08	0.182377	0.187732	0.0465051	0.0361037	0.0206988	0		2.8725e-08	-0.707835	1.81605	-1.41564	0.836569	-1.28862
2.875e-08	0.197864	0.172087	0.0507328	0.0336014	0.0233574	0		2.875e-08	1.52092	-0.0108105	0.217663	-0.166453	-0.0106881
2.8775e-08	0.183712	0.1655	0.0476325	0.0357462	0.0205089	7.62021e-05		2.8775e-08	-0.443402	-0.763851	-0.905018	0.667136	-1.34642
2.88e-08	0.190387	0.18238	0.0520011	0.03521	0.0235473	0		2.88e-08	0.540176	1.27325	0.785536	0.888767	0.113899
2.8825e-08	0.189586	0.16797	0.0487599	0.0350313	0.0250665	0.000152404		2.8825e-08	0.465063	-0.411193	-0.392639	2.58529	0.85377
2.885e-08	0.186115	0.177028	0.0493236	0.0375335	0.0224079	0		2.885e-08	0.010924	0.697247	-0.13572	0.102985	-0.39411
2.8875e-08	0.176502	0.170852	0.0470688	0.0357462	0.0248766	0		2.8875e-08	-1.31591	-0.00860231	-0.944709	-0.783993	0.798809
2.89e-08	0.192256	0.177028	0.0515784	0.0334227	0.0205089	7.62021e-05		2.89e-08	0.959615	0.757898	0.806787	0.854464	-1.26598
2.8925e-08	0.195728	0.172499	0.0453777	0.0337802	0.0225978	0		2.8925e-08	1.49189	0.247606	-1.49967	-0.897808	-0.253155
2.895e-08	0.179973	0.168382	0.0438275	0.0355675	0.0199392	0		2.895e-08	-0.710735	-0.214277	-2.04581	-0.924096	-1.50584
2.8975e-08	0.183712	0.179909	0.046646	0.0339589	0.0243069	7.62021e-05		2.8975e-08	-0.140953	1.19354	-0.932556	0.534007	0.597358
2.9e-08	0.175434	0.170852	0.0505919	0.0348525	0.0218382	7.62021e-05		2.9e-08	-1.28265	0.140477	0.612266	0.323328	-0.565833
2.9025e-08	0.177036	0.173322	0.0498873	0.0364611	0.0246867	7.62021e-05		2.9025e-08	-1.01722	0.466028	0.388423	2.52982	0.814143
2.905e-08	0.179439	0.177439	0.0446731	0.0391421	0.0189897	0		2.905e-08	-0.637177	0.989311	-1.55657	-0.0377982	-1.89714
2.9075e-08	0.18478	0.172499	0.0483371	0.0327078	0.0233574	0		2.9075e-08	0.162795	0.427257	-0.115153	1.67591	0.212131
2.91e-08	0.19279	0.153973	0.0473506	0.039857	0.0262058	0		2.91e-08	1.34545	-1.76592	-0.448844	1.09182	1.59579
2.9125e-08	0.173832	0.16056	0.0449549	0.0371761	0.0246867	0		2.9125e-08	-1.32713	-0.94663	-1.32294	2.56135	0.884549
2.915e-08	0.182644	0.169205	0.0449549	0.03521	0.0244968	0		2.915e-08	-0.0292786	0.121205	-1.28086	0.106498	0.8109
2.9175e-08	0.181842	0.174146	0.0462232	0.0396783	0.0212685	0		2.9175e-08	-0.106306	0.744985	-0.752017	0.829143	-0.723915
2.92e-08	0.183979	0.160148	0.0490417	0.0309205	0.0187998	0		2.92e-08	0.237491	-0.909489	0.373589	-0.383614	-1.89558
2.9225e-08	0.181575	0.156443	0.0450958	0.0359249	0.0225978	0		2.9225e-08	-0.069316	-1.32686	-1.1003	-0.911081	-0.0510281
2.925e-08	0.168491	0.168794	0.0474915	0.0327078	0.0212685	0		2.925e-08	-1.90963	0.190242	-0.135554	1.37822	-0.674867
2.9275e-08	0.175434	0.176204	0.0460823	0.0364611	0.0243069	0		2.9275e-08	-0.876227	1.11364	-0.635799	-0.904106	0.807025
2.93e-08	0.17757	0.167559	0.0498873	0.0262735	0.024117	0		2.93e-08	-0.532262	0.100342	0.875425	-0.367314	0.732812
2.9325e-08	0.182644	0.171676	0.0493236	0.0393208	0.0229776	0		2.9325e-08	0.234609	0.627077	0.701673	-0.0179499	0.199752
2.935e-08	0.179973	0.171676	0.0483371	0.0348525	0.0231675	7.62021e-05		2.935e-08	-0.112105	0.656896	0.363822	0.20628	0.308497
2.9375e-08	0.173298	0.161795	0.0442503	0.0282395	0.0284846	0		2.9375e-08	-1.03631	-0.508488	-1.17592	1.24959	2.89813
2.94e-08	0.177837	0.162618	0.0419955	0.0357462	0.0216483	0		2.94e-08	-0.345273	-0.379841	-2.00881	0.088607	-0.393095
2.9425e-08	0.183712	0.174146	0.0472097	0.0314567	0.0227877	0.000152404		2.9425e-08	0.539326	1.04568	0.056439	2.39631	0.175481
2.945e-08	0.178104	0.176204	0.0487599	0.0310992	0.0216483	7.62021e-05		2.945e-08	-0.232325	1.32533	0.70207	0.222929	-0.360188
2.9475e-08	0.193591	0.150679	0.0446731	0.0350313	0.0199392	0		2.9475e-08	2.04223	-1.74107	-0.844856	-0.500487	-1.17319
2.95e-08	0.173031	0.146562	0.0477734	0.0309205	0.0174706	0		2.95e-08	-0.891275	-2.2129	0.404997	-0.782329	-2.35641
2.9525e-08	0.186649	0.164677	0.0462232	0.0368186	0.0227877	0		2.9525e-08	1.11553	0.0155728	-0.156652	-0.938132	0.243026
2.955e-08	0.183979	0.159325	0.0472097	0.0339589	0.0216483	0		2.955e-08	0.767035	-0.605954	0.270973	1.44434	-0.294367
2.9575e-08	0.180507	0.157678	0.0446731	0.0348525	0.0220281	7.62021e-05		2.9575e-08	0.301902	-0.777609	-0.678188	-0.0439171	-0.0930487
2.96e-08	0.172497	0.159325	0.0459414	0.0330652	0.0212685	0		2.96e-08	-0.822088	-0.548525	-0.140069	-0.0089494	-0.446566
2.9625e-08	0.169292	0.16303	0.0400225	0.0319929	0.0218382	0		2.9625e-08	-1.2504	-0.0683104	-2.41775	-0.16503	-0.152528
2.965e-08	0.179706	0.177439	0.0414318	0.030563	0.0205089	0		2.965e-08	0.297855	1.71784	-1.82525	-0.25777	-0.784669
2.9675e-08	0.174099	0.158501	0.0435457	0.0327078	0.0193695	0		2.9675e-08	-0.479508	-0.562784	-0.954596	0.351286	-1.32507
2.97e-08	0.179973	0.170852	0.0424183	0.032529	0.0233574	0		2.97e-08	0.411451	0.974187	-1.35686	0.897756	0.639381
2.9725e-08	0.175968	0.181556	0.0458005	0.0298481	0.0180403	0		2.9725e-08	-0.133909	2.31211	0.0156353	-0.345658	-1.94404
2.975e-08	0.189052	0.165089	0.0425592	0.0357462	0.0235473	0		2.975e-08	1.80827	0.328879	-1.22009	-1.01561	0.76649
2.9775e-08	0.164486	0.156855	0.0491826	0.0337802	0.0231675	0		2.9775e-08	-1.73301	-0.649597	1.4348	1.13358	0.597596
2.98e-08	0.175701	0.160148	0.0414318	0.0339589	0.0197493	0		2.98e-08	-0.0619057	-0.217722	-1.58453	0.527699	-1.06103
2.9825e-08	0.174099	0.15562	0.0425592	0.0309205	0.0199392	0		2.9825e-08	-0.258791	-0.744004	-1.09855	0.17735	-0.952187
2.985e-08	0.174099	0.169205	0.0408681	0.0314567	0.0201291	0		2.985e-08	-0.222062	0.950751	-1.7279	1.2412	-0.84321
2.9875e-08	0.170628	0.173734	0.0439684	0.0284182	0.0218382	0		2.9875e-08	-0.692601	1.53621	-0.458766	1.21265	0.0123408
2.99e-08	0.165821	0.165089	0.0465051	0.0327078	0.0243069	0		2.99e-08	-1.3591	0.504253	0.589476	-0.68551	1.24269
2.9925e-08	0.164753	0.177439	0.0435457	0.0312779	0.0184201	0		2.9925e-08	-1.47951	2.05173	-0.544435	-0.458237	-1.63679
2.995e-08	0.166088	0.167147	0.0417136	0.0302055	0.0229776	0		2.995e-08	-1.24817	0.81601	-1.23244	1.25547	0.622863
2.9975e-08	0.175167	0.156031	0.0469278	0.0293119	0.0212685	0		2.9975e-08	0.118344	-0.522925	0.885065	0.838497	-0.202541
3e-08	0.175167	0.154796	0.0418546	0.0312779	0.0216483	0		3e-08	0.155255	-0.646635	-1.09598	1.39177	0.00105349
3.0025e-08	0.191722	0.16797	0.0379087	0.0289544	0.0193695	0		3.0025e-08	2.62193	1.00585	-2.63161	1.75167	-1.10737
3.005e-08	0.177036	0.157678	0.0412909	0.0364611	0.0193695	7.62021e-05		3.005e-08	0.503531	-0.234482	-1.24123	0.554755	-1.09184
3.0075e-08	0.171696	0.173322	0.0481962	0.0344951	0.0218382	7.62021e-05		3.0075e-08	-0.244364	1.72558	1.56241	0.849302	0.144096
3.01e-08	0.188251	0.149444	0.0494645	0.0316354	0.0208887	0		3.01e-08	2.22714	-1.19473	2.11359	0.884243	-0.309223
3.0125e-08	0.177303	0.16797	0.0412909	0.0280608	0.0218382	0		3.0125e-08	0.653937	1.12374	-1.12203	1.70051	0.176966
3.015e-08	0.175167	0.162618	0.0400225	0.0336014	0.0225978	0		3.015e-08	0.376369	0.491003	-1.59168	0.563036	0.569784
3.0175e-08	0.177837	0.166324	0.0443912	0.0298481	0.0239271	0		3.0175e-08	0.806847	0.978835	0.204272	0.858601	1.24569
3.02e-08	0.182109	0.1655	0.0419955	0.033244	0.0195594	0		3.02e-08	1.47424	0.906183	-0.718942	-0.609055	-0.904573
3.0225e-08	0.171963	0.16797	0.0445321	0.030563	0.0231675	0		3.0225e-08	0.0140672	1.2418	0.343604	0.86294	0.902948
3.025e-08	0.17036	0.156855	0.042982	0.0319929	0.0212685	7.62021e-05		3.025e-08	-0.186039	-0.108109	-0.240664	0.570365	-0.0239275
3.0275e-08	0.164753	0.149033	0.0427001	0.030563	0.0212685	0		3.0275e-08	-0.978609	-1.05104	-0.314061	1.65345	-0.00769316
3.03e-08	0.171696	0.162618	0.041009	0.0355675	0.0195594	0		3.03e-08	0.0841787	0.665145	-0.957767	0.31098	-0.842236
3.0325e-08	0.18745	0.159325	0.0443912	0.032529	0.0227877	7.62021e-05		3.0325e-08	2.45292	0.284509	0.451231	-0.180616	0.781545
3.035e-08	0.166889	0.165089	0.0414318	0.0298481	0.0214584	0		3.035e-08	-0.554956	1.03053	-0.707478	1.23367	0.135603
3.0375e-08	0.168491	0.158501	0.0403044	0.0337802	0.0210786	0		3.0375e-08	-0.281484	0.239322	-1.12539	0.478498	-0.0376234
3.04e-08	0.166088	0.154796	0.042841	0.0321716	0.0187998	0		3.04e-08	-0.601885	-0.193874	-0.0554925	0.973809	-1.15933
3.0425e-08	0.176502	0.164677	0.0388952	0.0341376	0.0178504	0		3.0425e-08	0.980134	1.06687	-1.62031	-0.113322	-1.61852
3.045e-08	0.16235	0.172087	0.041009	0.0323503	0.0233574	0		3.045e-08	-1.08547	2.02109	-0.720831	-0.278181	1.15035
3.0475e-08	0.159413	0.159325	0.0442503	0.0327078	0.0216483	0		3.0475e-08	-1.48665	0.456774	0.640322	0.61452	0.312036
3.05e-08	0.173031	0.16797	0.0419955	0.0350313	0.0214584	7.62021e-05		3.05e-08	0.574777	1.56624	-0.239136	0.383747	0.233293
3.0525e-08	0.162617	0.157678	0.0431229	0.0287757	0.0165211	0		3.0525e-08	-0.939152	0.308191	0.261489	1.27894	-2.22518
3.055e-08	0.170628	0.144916	0.0443912	0.028597	0.0231675	0		3.055e-08	0.289958	-1.26099	0.82078	0.119335	1.12315
3.0575e-08	0.167423	0.154796	0.0414318	0.0321716	0.0187998	0		3.0575e-08	-0.151487	0.00420518	-0.350604	-0.511608	-1.0525
3.06e-08	0.170093	0.145739	0.0442503	0.0307417	0.0220281	0		3.06e-08	0.282945	-1.10305	0.844788	0.385206	0.584555
3.0625e-08	0.163151	0.155208	0.0421364	0.0291332	0.0220281	0		3.0625e-08	-0.717465	0.112379	0.0177243	-0.113882	0.601019
3.065e-08	0.171963	0.15809	0.0422773	0.0321716	0.0195594	0		3.065e-08	0.634839	0.502526	0.115541	-0.947299	-0.62463
3.0675e-08	0.173832	0.145327	0.0407272	0.0307417	0.0233574	0		3.0675e-08	0.950876	-1.07242	-0.482411	0.685596	1.3033
3.07e-08	0.180774	0.160972	0.0395998	0.027882	0.0180403	0		3.07e-08	2.02656	0.922099	-0.907636	-0.7499	-1.35912
3.0725e-08	0.159947	0.148209	0.0411499	0.028597	0.0201291	7.62021e-05		3.0725e-08	-1.05498	-0.65491	-0.229505	0.95355	-0.290729
3.075e-08	0.165554	0.146974	0.0403044	0.0309205	0.0197493	7.62021e-05		3.075e-08	-0.17938	-0.782739	-0.539285	0.452028	-0.46665
3.0775e-08	0.174366	0.146151	0.0393179	0.0262735	0.0233574	0		3.0775e-08	1.17795	-0.858936	-0.908201	-1.18974	1.37131
3.08e-08	0.169292	0.157266	0.0405862	0.0268097	0.0191796	7.62021e-05		3.08e-08	0.4533	0.570269	-0.344833	1.18927	-0.723418
3.0825e-08	0.167957	0.148621	0.0401635	0.0330652	0.0239271	0		3.0825e-08	0.288975	-0.492294	-0.481055	1.82751	1.69344
3.085e-08	0.167156	0.147797	0.0408681	0.0264522	0.0191796	0		3.085e-08	0.20462	-0.568598	-0.149972	-0.0873778	-0.692715
3.0875e-08	0.1749	0.165089	0.0463641	0.0302055	0.0182302	7.62021e-05		3.0875e-08	1.40524	1.64427	2.17186	-0.86251	-1.15841
3.09e-08	0.165287	0.149033	0.0400225	0.0266309	0.0182302	0		3.09e-08	-0.00477047	-0.357154	-0.423297	-2.04361	-1.14343
3.0925e-08	0.163418	0.135858	0.0376268	0.0268097	0.0151918	0		3.0925e-08	-0.250502	-1.99678	-1.38184	-0.731966	-2.6701
3.095e-08	0.169559	0.153149	0.0407272	0.0298481	0.0187998	7.62021e-05		3.095e-08	0.710805	0.219816	-0.0520549	1.12264	-0.824163
3.0975e-08	0.162617	0.16056	0.0415727	0.0266309	0.022218	0		3.0975e-08	-0.300089	1.18724	0.339865	-0.601049	0.92808
3.1e-08	0.169559	0.142445	0.0381905	0.0303843	0.0214584	0		3.1e-08	0.783381	-1.08161	-1.03352	-0.298668	0.558329
3.1025e-08	0.179706	0.149444	0.0419955	0.0294906	0.0199392	0		3.1025e-08	2.35235	-0.166099	0.595534	-1.07955	-0.198618
3.105e-08	0.151936	0.151914	0.0407272	0.0302055	0.0212685	0		3.105e-08	-1.80811	0.175434	0.104041	-0.641643	0.49408
3.1075e-08	0.161549	0.13627	0.0397407	0.0289544	0.01861	0		3.1075e-08	-0.319683	-1.7853	-0.270556	0.408087	-0.844926
3.11e-08	0.170093	0.146562	0.0376268	0.0271671	0.0197493	7.62021e-05		3.11e-08	1.00914	-0.449461	-1.11922	-0.238993	-0.248604
3.1125e-08	0.161549	0.144092	0.042982	0.0248436	0.0210786	7.62021e-05		3.1125e-08	-0.249002	-0.736438	1.16806	-0.0711473	0.445545
3.115e-08	0.160748	0.158913	0.0411499	0.0282395	0.0210786	0		3.115e-08	-0.335081	1.17899	0.437532	1.11863	0.461606
3.1175e-08	0.158611	0.154796	0.0414318	0.0293119	0.0184201	0		3.1175e-08	-0.623855	0.682786	0.595406	0.47003	-0.88161
3.12e-08	0.160748	0.147797	0.0388952	0.0289544	0.0174706	7.62021e-05		3.12e-08	-0.264469	-0.181847	-0.434646	0.912078	-1.3524
3.1225e-08	0.17036	0.152326	0.0374859	0.0269884	0.0210786	0		3.1225e-08	1.23127	0.424	-0.991338	0.466721	0.509842
3.125e-08	0.159413	0.14121	0.0390361	0.0284182	0.0199392	0		3.125e-08	-0.396809	-0.9682	-0.29896	-1.00579	-0.0579584
3.1275e-08	0.156208	0.148621	0.0363585	0.027882	0.0218382	0		3.1275e-08	-0.849167	0.00632441	-1.3936	-1.24897	0.93156
3.13e-08	0.157543	0.144092	0.0367813	0.0264522	0.0206988	0		3.13e-08	-0.611123	-0.545472	-1.17786	1.31796	0.363143
3.1325e-08	0.160748	0.145327	0.0401635	0.0287757	0.0176605	0		3.1325e-08	-0.088019	-0.360084	0.293038	1.00792	-1.18155
3.135e-08	0.162617	0.144916	0.0352311	0.0298481	0.0212685	0		3.135e-08	0.232214	-0.385488	-1.76214	-2.32587	0.687772
3.1375e-08	0.159146	0.137093	0.0362176	0.0302055	0.0172807	0		3.1375e-08	-0.261985	-1.36125	-1.3068	-0.508568	-1.34751
3.14e-08	0.159947	0.137505	0.0398816	0.0318141	0.0193695	0		3.14e-08	-0.104582	-1.28181	0.28869	2.07001	-0.257597
3.1425e-08	0.161549	0.142445	0.0384724	0.0235925	0.0163312	0		3.1425e-08	0.175422	-0.6207	-0.27311	-0.722251	-1.80757
3.145e-08	0.151135	0.135035	0.0380496	0.0296693	0.0233574	7.62021e-05		3.145e-08	-1.38157	-1.54593	-0.415615	1.5856	1.82927
3.1475e-08	0.166889	0.156031	0.0376268	0.0277033	0.0206988	7.62021e-05		3.1475e-08	1.06342	1.18086	-0.55855	0.030036	0.474457
3.15e-08	0.16502	0.13133	0.0367813	0.0277033	0.0206988	0		3.15e-08	0.813179	-1.96995	-0.882642	0.891365	0.490376
3.1525e-08	0.154873	0.135858	0.0388952	0.0275246	0.0176605	0		3.1525e-08	-0.705971	-1.36061	0.0586627	-0.0454825	-1.06384
3.155e-08	0.16235	0.151503	0.0370631	0.0296693	0.0189897	0		3.155e-08	0.475186	0.682279	-0.688331	-1.53891	-0.361689
3.1575e-08	0.151402	0.141622	0.0418546	0.0262735	0.0195594	0		3.1575e-08	-1.16947	-0.564259	1.40338	0.363863	-0.0516298
3.16e-08	0.162884	0.143269	0.0374859	0.0282395	0.0184201	7.62021e-05		3.16e-08	0.628026	-0.324701	-0.433087	-0.160207	-0.626347
3.1625e-08	0.162617	0.144504	0.0376268	0.0314567	0.0208887	0		3.1625e-08	0.622466	-0.138006	-0.335429	1.60896	0.668246
3.165e-08	0.161282	0.150268	0.0393179	0.0293119	0.0205089	0		3.165e-08	0.4526	0.634343	0.429473	-0.585515	0.487184
3.1675e-08	0.165287	0.133388	0.0380496	0.0250223	0.0197493	7.62021e-05		3.1675e-08	1.10437	-1.52136	-0.0788913	0.0720558	0.108666
3.17e-08	0.150067	0.149033	0.0403044	0.0298481	0.0174706	7.62021e-05		3.17e-08	-1.20395	0.530165	0.931048	-0.175801	-1.0597
3.1725e-08	0.165287	0.134212	0.0381905	0.0264522	0.0189897	0		3.1725e-08	1.17599	-1.36215	0.0568165	0.902519	-0.255218
3.175e-08	0.14713	0.143269	0.0393179	0.0289544	0.0174706	0		3.175e-08	-1.58873	-0.161592	0.581613	0.0257291	-1.03045
3.1775e-08	0.151936	0.125154	0.035513	0.0291332	0.0161413	7.62021e-05		3.1775e-08	-0.813111	-2.48459	-1.02716	-1.97277	-1.70801
3.18e-08	0.151402	0.143269	0.0384724	0.0284182	0.0176605	7.62021e-05		3.18e-08	-0.861322	-0.107276	0.291061	-0.823141	-0.902278
3.1825e-08	0.158344	0.13874	0.039177	0.0273458	0.0201291	7.62021e-05		3.1825e-08	0.245974	-0.668534	0.634125	-0.16206	0.399812
3.185e-08	0.150334	0.138329	0.0372041	0.0253798	0.0172807	7.62021e-05		3.185e-08	-0.958143	-0.695354	-0.184859	0.921607	-1.07118
3.1875e-08	0.163151	0.153561	0.0343856	0.0273458	0.0205089	0		3.1875e-08	1.05989	1.31336	-1.37336	2.07782	0.629442
3.19e-08	0.156742	0.146974	0.0377678	0.0280608	0.0193695	0		3.19e-08	0.102717	0.483778	0.134147	-0.774019	0.049675
3.1925e-08	0.1498	0.135858	0.0339628	0.0226988	0.0170908	0		3.1925e-08	-0.938639	-0.937148	-1.48663	-0.110285	-1.12699
3.195e-08	0.145794	0.143681	0.0348083	0.0269884	0.0205089	0		3.195e-08	-1.52589	0.109368	-1.0825	-0.643856	0.676821
3.1975e-08	0.154606	0.124743	0.0397407	0.0219839	0.0199392	7.62021e-05		3.1975e-08	-0.124356	-2.33474	1.10726	0.374291	0.394176
3.2e-08	0.144993	0.148621	0.0367813	0.0300268	0.0187998	7.62021e-05		3.2e-08	-1.58306	0.808986	-0.148567	0.970572	-0.187606
3.2025e-08	0.155674	0.140387	0.035513	0.0284182	0.0180403	0		3.2025e-08	0.110891	-0.239409	-0.667174	1.28507	-0.571032
3.205e-08	0.159947	0.140799	0.0384724	0.0252011	0.0191796	0		3.205e-08	0.810228	-0.1587	0.66553	0.396254	0.0420444
3.2075e-08	0.149266	0.137917	0.0339628	0.0284182	0.0233574	0		3.2075e-08	-0.817456	-0.508975	-1.27552	-0.281906	2.25262
3.21e-08	0.160748	0.132977	0.0352311	0.033244	0.0180403	0		3.21e-08	1.00531	-1.1294	-0.683413	-0.393863	-0.526653
3.2125e-08	0.157276	0.135035	0.0395998	0.0230563	0.0178504	0		3.2125e-08	0.499344	-0.833445	1.27317	-0.50613	-0.611812
3.215e-08	0.156208	0.149444	0.0380496	0.0235925	0.01861	0		3.215e-08	0.367563	1.0829	0.628711	0.377002	-0.197045
3.2175e-08	0.154072	0.153973	0.0366404	0.027882	0.0187998	0		3.2175e-08	0.068805	1.70508	0.0448494	0.621214	-0.0819359
3.22e-08	0.149266	0.132153	0.0372041	0.0280608	0.0195594	0		3.22e-08	-0.647614	-1.13284	0.330033	0.01062	0.333834
3.2225e-08	0.149266	0.144916	0.0438275	0.0262735	0.0163312	0		3.2225e-08	-0.613601	0.57092	3.29227	-0.244591	-1.35488
3.225e-08	0.150601	0.130918	0.0367813	0.0303843	0.0189897	0		3.225e-08	-0.370694	-1.24308	0.216541	-0.429005	0.063704
3.2275e-08	0.146061	0.150679	0.0363585	0.0271671	0.0187998	7.62021e-05		3.2275e-08	-1.04734	1.38431	0.0658137	-1.47197	-0.0215147
3.23e-08	0.150601	0.137093	0.0374859	0.030563	0.0187998	0		3.23e-08	-0.302454	-0.377626	0.60162	0.847017	-0.0064276
3.2325e-08	0.150868	0.146562	0.0372041	0.0209115	0.0172807	0		3.2325e-08	-0.226495	0.897232	0.513266	0.949489	-0.795733
3.235e-08	0.154606	0.128448	0.0376268	0.0257373	0.0191796	0		3.235e-08	0.394222	-1.46517	0.737607	1.62597	0.224961
3.2375e-08	0.148198	0.137093	0.0333991	0.0273458	0.0189897	0		3.2375e-08	-0.57757	-0.298023	-1.1056	1.29847	0.139478
3.24e-08	0.150868	0.128036	0.03354	0.0271671	0.0218382	7.62021e-05		3.24e-08	-0.124131	-1.46813	-1.00817	1.47343	1.66626
3.2425e-08	0.155407	0.116921	0.041009	0.0275246	0.0180403	7.62021e-05		3.2425e-08	0.623868	-2.91212	2.35544	-0.294328	-0.334489
3.245e-08	0.154606	0.151091	0.0374859	0.0225201	0.0189897	0		3.245e-08	0.532495	1.63377	0.822034	0.815762	0.184934
3.2475e-08	0.1498	0.137505	0.0342446	0.0266309	0.022218	0		3.2475e-08	-0.189818	-0.137214	-0.589031	-0.379638	1.91719
3.25e-08	0.156208	0.139564	0.0397407	0.0262735	0.0187998	0		3.25e-08	0.854193	0.162158	1.90386	2.24873	0.114186
3.2525e-08	0.16235	0.1338	0.0350902	0.02395	0.0163312	0		3.2525e-08	1.85752	-0.57534	-0.140356	1.26894	-1.1858
3.255e-08	0.144993	0.135035	0.0332582	0.0241287	0.0159514	0.000152404		3.255e-08	-0.846273	-0.38523	-0.926055	0.286937	-1.37419
3.2575e-08	0.143391	0.145739	0.035372	0.0296693	0.0161413	0		3.2575e-08	-1.06586	1.06255	0.0568954	2.77929	-1.25897
3.26e-08	0.143658	0.140387	0.0333991	0.027882	0.0191796	0		3.26e-08	-0.9904	0.378662	-0.793842	-0.233549	0.377219
3.2625e-08	0.148198	0.137917	0.0310034	0.0241287	0.0170908	0		3.2625e-08	-0.23915	0.0770062	-1.83668	0.303677	-0.723699
3.265e-08	0.144726	0.135858	0.0364994	0.0209115	0.01861	0.000152404		3.265e-08	-0.754746	-0.170321	0.671074	-0.901848	0.102997
3.2675e-08	0.151936	0.145739	0.037345	0.0262735	0.0151918	0		3.2675e-08	0.420628	1.17206	1.08834	2.1088	-1.71116
3.27e-08	0.148198	0.139564	0.0331172	0.0264522	0.0187998	0		3.27e-08	-0.137614	0.376414	-0.782715	2.43167	0.234663
3.2725e-08	0.158344	0.142445	0.0343856	0.0252011	0.0193695	0		3.2725e-08	1.50572	0.787604	-0.175328	-0.0147693	0.555055
3.275e-08	0.146862	0.13627	0.0342446	0.0266309	0.0165211	7.62021e-05		3.275e-08	-0.281796	-0.00957164	-0.204018	-1.51789	-0.957392
3.2775e-08	0.156742	0.14121	0.0339628	0.0273458	0.0174706	7.62021e-05		3.2775e-08	1.32126	0.676777	-0.296715	-1.27115	-0.433617
3.28e-08	0.141522	0.147386	0.0325536	0.0291332	0.0161413	0		3.28e-08	-1.06335	1.52916	-0.900743	0.5848	-1.13314
3.2825e-08	0.152203	0.13874	0.0329763	0.0252011	0.0208887	7.62021e-05		3.2825e-08	0.668736	0.400195	-0.674932	-0.117554	1.43286
3.285e-08	0.148198	0.1338	0.0377678	0.0255585	0.0206988	0		3.285e-08	0.0653892	-0.234456	1.53584	-1.84744	1.34658
3.2875e-08	0.147664	0.135035	0.0342446	0.0273458	0.0161413	0		3.2875e-08	0.0141162	-0.0428008	-0.0297518	-0.353218	-1.09127
3.29e-08	0.137784	0.140387	0.0356539	0.0241287	0.0170908	0		3.29e-08	-1.52713	0.701017	0.646725	0.115996	-0.565757
3.2925e-08	0.134846	0.137093	0.0284667	0.0257373	0.0224079	0		3.2925e-08	-1.96306	0.286048	-2.59351	-0.590092	2.31552
3.295e-08	0.146862	0.132977	0.0349493	0.0237712	0.0178504	0		3.295e-08	-0.0124375	-0.240094	0.396456	0.542138	-0.127188
3.2975e-08	0.145527	0.128036	0.0314262	0.0260947	0.0229776	0		3.2975e-08	-0.19202	-0.877662	-1.1777	-0.459785	2.65621
3.3e-08	0.151135	0.130918	0.0333991	0.0210903	0.0155716	7.62021e-05		3.3e-08	0.738028	-0.464531	-0.242011	0.674865	-1.32933
3.3025e-08	0.141789	0.132565	0.0345265	0.0235925	0.0159514	0		3.3025e-08	-0.723024	-0.21703	0.30851	0.704385	-1.11019
3.305e-08	0.148198	0.129271	0.035513	0.0257373	0.0163312	7.62021e-05		3.305e-08	0.33609	-0.634411	0.795541	0.290413	-0.890767
3.3075e-08	0.150868	0.1338	0.0308625	0.0273458	0.0210786	7.62021e-05		3.3075e-08	0.797707	0.00152946	-1.30302	-0.716426	1.69464
3.31e-08	0.146862	0.122273	0.0342446	0.0264522	0.0165211	7.62021e-05		3.31e-08	0.189611	-1.52664	0.283631	-0.614513	-0.759811
3.3125e-08	0.143124	0.126389	0.0312852	0.0252011	0.016711	0		3.3125e-08	-0.376557	-0.946043	-1.04262	-0.438304	-0.642717
3.315e-08	0.14526	0.129683	0.0332582	0.0250223	0.01861	0		3.315e-08	-0.000334029	-0.475812	-0.101056	-0.113329	0.402334
3.3175e-08	0.145794	0.126389	0.0305806	0.0228776	0.0176605	0		3.3175e-08	0.118972	-0.89506	-1.30089	3.11	-0.0985518
3.32e-08	0.145527	0.143269	0.0339628	0.0250223	0.0199392	7.62021e-05		3.32e-08	0.109614	1.4131	0.292639	-0.205218	1.15495
3.3225e-08	0.150601	0.139975	0.0352311	0.0262735	0.0197493	7.62021e-05		3.3225e-08	0.959539	0.994554	0.913158	-1.66608	1.06714
3.325e-08	0.144993	0.139564	0.0322717	0.0244861	0.01861	7.62021e-05		3.325e-08	0.0907214	0.965634	-0.420186	0.522187	0.462166
3.3275e-08	0.143124	0.129683	0.027903	0.0280608	0.0161413	0		3.3275e-08	-0.177014	-0.346695	-2.40907	-0.941176	-0.868104
3.33e-08	0.151669	0.134212	0.031708	0.025916	0.0136726	0.000152404		3.33e-08	1.23411	0.293292	-0.614178	0.729435	-2.20042
3.3325e-08	0.148465	0.135858	0.0312852	0.0262735	0.0218382	7.62021e-05		3.3325e-08	0.751222	0.543022	-0.777049	-0.58746	2.26879
3.335e-08	0.133511	0.13133	0.0294532	0.0241287	0.0142423	7.62021e-05		3.335e-08	-1.62975	-0.0456896	-1.59497	-0.335316	-1.86348
3.3375e-08	0.146328	0.137093	0.035513	0.028597	0.0182302	0		3.3375e-08	0.473646	0.763672	1.25511	0.142091	0.329259
3.34e-08	0.144459	0.1338	0.0338219	0.0252011	0.0178504	0		3.34e-08	0.204956	0.34221	0.503135	2.04566	0.136289
3.3425e-08	0.139653	0.132977	0.0274803	0.0237712	0.0180403	0		3.3425e-08	-0.539503	0.256352	-2.41799	0.724347	0.254857
3.345e-08	0.143124	0.130918	0.0336809	0.0225201	0.0191796	0		3.345e-08	0.0555444	0.00210215	0.506301	-1.35148	0.893722
3.3475e-08	0.13271	0.125978	0.0308625	0.0207328	0.0146221	7.62021e-05		3.3475e-08	-1.59896	-0.645405	-0.775835	0.029672	-1.58961
3.35e-08	0.132443	0.122273	0.0293123	0.0250223	0.0193695	0		3.35e-08	-1.61022	-1.12542	-1.46785	0.735723	1.02828
3.3525e-08	0.138585	0.128448	0.0328354	0.02395	0.0172807	7.62021e-05		3.3525e-08	-0.581434	-0.257314	0.213451	0.462871	-0.103352
3.355e-08	0.13725	0.130095	0.0286077	0.0230563	0.0172807	0		3.355e-08	-0.765594	-0.0066849	-1.73411	1.09518	-0.088973
3.3575e-08	0.140988	0.123508	0.0301578	0.0243074	0.0155716	0		3.3575e-08	-0.125468	-0.881432	-0.975244	-1.97402	-1.01438
3.36e-08	0.143391	0.117744	0.0288895	0.0246649	0.0197493	0		3.36e-08	0.298363	-1.64484	-1.5386	0.245443	1.29823
3.3625e-08	0.138585	0.14121	0.0336809	0.0221626	0.0161413	0		3.3625e-08	-0.450741	1.59264	0.74611	-0.408047	-0.673348
3.365e-08	0.138318	0.134623	0.0346674	0.0234138	0.0176605	0		3.365e-08	-0.461549	0.717059	1.24471	-0.759741	0.177783
3.3675e-08	0.146595	0.126389	0.0310034	0.0205541	0.0172807	0		3.3675e-08	0.920415	-0.38561	-0.447195	0.405482	-0.0171598
3.37e-08	0.138852	0.126801	0.0336809	0.0228776	0.0182302	0		3.37e-08	-0.309066	-0.30363	0.848903	0.661545	0.521282
3.3725e-08	0.143124	0.120214	0.0322717	0.0262735	0.01861	0		3.3725e-08	0.421108	-1.18259	0.217584	-0.678841	0.745845
3.375e-08	0.137517	0.132565	0.035372	0.0244861	0.01861	0.000152404		3.375e-08	-0.46164	0.539424	1.71698	1.86024	0.760781
3.3775e-08	0.13725	0.139564	0.0312852	0.0219839	0.0169009	0		3.3775e-08	-0.472711	1.52792	-0.182443	0.365708	-0.169745
3.38e-08	0.133778	0.132977	0.0342446	0.02395	0.0195594	0		3.38e-08	-1.00805	0.648212	1.25279	-1.28463	1.31627
3.3825e-08	0.140988	0.146151	0.0321308	0.0209115	0.0136726	7.62021e-05		3.3825e-08	0.204306	2.48854	0.284382	0.268789	-1.9299
3.385e-08	0.136182	0.129271	0.0291714	0.0218052	0.0165211	0		3.385e-08	-0.550159	0.189765	-1.0878	-0.850176	-0.337738
3.3875e-08	0.140721	0.132153	0.0332582	0.0246649	0.0161413	0		3.3875e-08	0.226414	0.612935	0.886959	0.477249	-0.534447
3.39e-08	0.129773	0.118979	0.0329763	0.02395	0.0170908	0.000152404		3.39e-08	-1.53676	-1.17923	0.786722	1.11796	0.00665297
3.3925e-08	0.135381	0.119391	0.0264938	0.0253798	0.0180403	7.62021e-05		3.3925e-08	-0.584483	-1.09764	-2.26833	-0.463892	0.548553
3.395e-08	0.140187	0.11445	0.0295941	0.0241287	0.0176605	7.62021e-05		3.395e-08	0.237525	-1.75568	-0.759029	-0.206726	0.352022
3.3975e-08	0.138318	0.129271	0.031708	0.0221626	0.0170908	0		3.3975e-08	-0.0368721	0.31854	0.282439	-0.102761	0.0494938
3.4e-08	0.139386	0.123096	0.0315671	0.0226988	0.0132928	0		3.4e-08	0.17155	-0.510463	0.248147	1.53989	-2.0515
3.4025e-08	0.143391	0.119802	0.0308625	0.0216265	0.0205089	0		3.4025e-08	0.863818	-0.941548	-0.0561321	0.875662	1.98325
3.405e-08	0.142323	0.124743	0.0346674	0.0225201	0.0140524	0		3.405e-08	0.721075	-0.231973	1.79944	-0.0213242	-1.60245
3.4075e-08	0.146595	0.119802	0.0301578	0.0237712	0.0165211	0		3.4075e-08	1.45862	-0.892015	-0.329065	-0.534435	-0.211425
3.41e-08	0.138051	0.120214	0.0343856	0.0225201	0.0169009	0		3.41e-08	0.0823122	-0.810104	1.73312	-0.0444526	0.0147498
3.4125e-08	0.152203	0.125978	0.0283258	0.0221626	0.014812	0		3.4125e-08	2.45174	0.0153852	-1.14545	0.523823	-1.13887
3.415e-08	0.126035	0.13133	0.0297351	0.0196604	0.0163312	7.62021e-05		3.415e-08	-1.83801	0.784819	-0.436072	1.24806	-0.275639
3.4175e-08	0.137517	0.132153	0.031708	0.0214477	0.0151918	0		3.4175e-08	0.0918372	0.925331	0.546387	-0.19599	-0.899633
3.42e-08	0.144726	0.132153	0.0307215	0.0226988	0.0157615	7.62021e-05		3.42e-08	1.31745	0.95139	0.103651	-0.867373	-0.566961
3.4225e-08	0.14259	0.129683	0.026071	0.028597	0.020319	0		3.4225e-08	0.997161	0.633303	-2.10923	1.25533	2.00232
3.425e-08	0.130574	0.116509	0.0290304	0.0241287	0.0138625	0		3.425e-08	-0.960885	-1.17768	-0.648805	1.90543	-1.60516
3.4275e-08	0.130841	0.124743	0.0290304	0.0237712	0.0165211	0		3.4275e-08	-0.884862	-0.00441581	-0.617309	1.70082	-0.0992659
3.43e-08	0.130574	0.127625	0.0319899	0.0234138	0.0180403	7.62021e-05		3.43e-08	-0.897426	0.423226	0.847724	-0.529644	0.768525
3.4325e-08	0.138318	0.135447	0.026071	0.023235	0.016711	0		3.4325e-08	0.42028	1.54174	-1.98959	-0.113586	0.0355497
3.435e-08	0.127904	0.113215	0.0252255	0.0218052	0.0157615	0		3.435e-08	-1.2778	-1.54051	-2.37023	-0.0870339	-0.48479
3.4375e-08	0.13992	0.125566	0.031708	0.0228776	0.016711	0		3.4375e-08	0.751968	0.211825	0.809737	-0.373049	0.0636956
3.44e-08	0.142056	0.123919	0.0319899	0.02395	0.0138625	0		3.44e-08	1.14032	0.00658387	0.979753	1.53051	-1.52788
3.4425e-08	0.13725	0.123508	0.0264938	0.0209115	0.0174706	0		3.4425e-08	0.372923	-0.0259005	-1.66417	0.149256	0.520347
3.445e-08	0.144459	0.116509	0.0294532	0.02395	0.01861	0		3.445e-08	1.60709	-0.982198	-0.190994	-0.999762	1.17798
3.4475e-08	0.131909	0.118979	0.0293123	0.0228776	0.0205089	7.62021e-05		3.4475e-08	-0.452692	-0.611079	-0.228081	0.359714	2.26573
3.45e-08	0.140454	0.122273	0.0308625	0.0228776	0.0155716	0.000152404		3.45e-08	1.00541	-0.123834	0.561041	-1.18434	-0.510054
3.4525e-08	0.13725	0.124331	0.0271984	0.0169794	0.0138625	0		3.4525e-08	0.503118	0.190486	-1.19909	-1.1591	-1.46346
3.455e-08	0.142857	0.112392	0.0274803	0.0214477	0.0117736	0		3.455e-08	1.4729	-1.46345	-1.0307	1.14876	-2.63339
3.4575e-08	0.131642	0.121449	0.0300169	0.0218052	0.0172807	0		3.4575e-08	-0.369832	-0.164702	0.243456	2.04303	0.499191
3.46e-08	0.128438	0.125978	0.0281849	0.0193029	0.0157615	0		3.46e-08	-0.874374	0.498052	-0.623894	0.651693	-0.34801
3.4625e-08	0.125234	0.125154	0.029876	0.0218052	0.0159514	7.62021e-05		3.4625e-08	-1.37968	0.407377	0.237899	0.046983	-0.226587
3.465e-08	0.125234	0.127213	0.0257892	0.0203753	0.0131029	0		3.465e-08	-1.34862	0.723039	-1.74056	1.89118	-1.83059
3.4675e-08	0.131909	0.114862	0.028044	0.0201966	0.0155716	0		3.4675e-08	-0.197721	-0.994787	-0.600608	0.41609	-0.414966
3.47e-08	0.135648	0.130095	0.0332582	0.0221626	0.0174706	0		3.47e-08	0.461729	1.18121	2.00067	0.125946	0.678737
3.4725e-08	0.123632	0.13627	0.0219842	0.0221626	0.0125332	0		3.4725e-08	-1.52446	2.08001	-3.52944	0.152293	-2.11726
3.475e-08	0.138051	0.129271	0.0287486	0.0203753	0.0174706	0		3.475e-08	0.930451	1.11642	-0.160009	-0.0594773	0.707551
3.4775e-08	0.123899	0.132565	0.0281849	0.0226988	0.0157615	7.62021e-05		3.4775e-08	-1.41775	1.6084	-0.407682	0.125475	-0.252341
3.48e-08	0.128438	0.119391	0.0307215	0.0250223	0.0178504	0		3.48e-08	-0.622643	-0.231897	0.879037	0.946974	0.953011
3.4825e-08	0.128171	0.115274	0.0312852	0.0228776	0.0172807	0		3.4825e-08	-0.636203	-0.790863	1.19055	0.973939	0.6423
3.485e-08	0.128171	0.115274	0.0297351	0.023235	0.0163312	0		3.485e-08	-0.604816	-0.766594	0.453779	-2.02759	0.114098
3.4875e-08	0.121762	0.10457	0.0300169	0.0191242	0.0195594	0		3.4875e-08	-1.65463	-2.26203	0.62538	1.98518	1.97383
3.49e-08	0.128705	0.123508	0.0307215	0.0201966	0.0142423	0		3.49e-08	-0.451851	0.451833	1.00755	0.495754	-1.0534
3.4925e-08	0.12737	0.124743	0.0305806	0.0201966	0.0178504	0		3.4925e-08	-0.645932	0.652595	0.969575	0.682039	1.02569
3.495e-08	0.122296	0.127625	0.0290304	0.0201966	0.0169009	0		3.495e-08	-1.47238	1.08794	0.229146	-2.17235	0.496128
3.4975e-08	0.122563	0.104981	0.0293123	0.0184093	0.0165211	0		3.4975e-08	-1.39646	-2.1106	0.401024	0.334661	0.292468
3.5e-08	0.134579	0.11445	0.0263529	0.0253798	0.0191796	7.62021e-05		3.5e-08	0.668849	-0.738109	-1.04568	0.92217	1.83227
3.5025e-08	0.134045	0.130506	0.0284667	0.0225201	0.0151918	0		3.5025e-08	0.610565	1.57562	0.0409534	1.10943	-0.443044
3.505e-08	0.126836	0.113627	0.0302988	0.0201966	0.014812	0		3.505e-08	-0.579794	-0.80722	0.988762	0.252322	-0.647947
3.5075e-08	0.126569	0.116509	0.0310034	0.023235	0.0172807	0		3.5075e-08	-0.59388	-0.371594	1.37362	-2.05458	0.785293
3.51e-08	0.12737	0.121037	0.0273393	0.0207328	0.0157615	0		3.51e-08	-0.42667	0.299963	-0.432165	0.545655	-0.0749389
3.5125e-08	0.132443	0.11198	0.0293123	0.0200179	0.0170908	0		3.5125e-08	0.46673	-0.970449	0.588768	1.37784	0.704453
3.515e-08	0.12737	0.111569	0.0263529	0.0214477	0.0187998	7.62021e-05		3.515e-08	-0.364078	-1.00543	-0.867666	0.839967	1.70395
3.5175e-08	0.128171	0.117332	0.0294532	0.0253798	0.0153817	0		3.5175e-08	-0.196437	-0.156052	0.722298	0.300951	-0.253176
3.52e-08	0.131642	0.103335	0.0259301	0.0219839	0.0178504	0		3.52e-08	0.426138	-2.13769	-1.02125	-0.0774984	1.18564
3.5225e-08	0.124433	0.100041	0.0274803	0.02395	0.0153817	0		3.5225e-08	-0.770615	-2.587	-0.209957	-0.294896	-0.226217
3.525e-08	0.123364	0.117744	0.0273393	0.0218052	0.0189897	0		3.525e-08	-0.921781	-0.0234057	-0.250837	2.48505	1.87357
3.5275e-08	0.119893	0.119802	0.0276212	0.0203753	0.0155716	7.62021e-05		3.5275e-08	-1.48336	0.296796	-0.0782351	-0.32572	-0.0893719
3.53e-08	0.125234	0.125566	0.0284667	0.0241287	0.0136726	0.000152404		3.53e-08	-0.540921	1.14999	0.379858	-1.19381	-1.17553
3.5325e-08	0.126035	0.123508	0.0287486	0.0216265	0.016711	7.62021e-05		3.5325e-08	-0.372994	0.879224	0.553317	1.18717	0.598023
3.535e-08	0.12016	0.118979	0.0266347	0.0235925	0.0165211	0		3.535e-08	-1.34658	0.252453	-0.487745	2.43397	0.50191
3.5375e-08	0.128171	0.134623	0.027903	0.0191242	0.0159514	7.62021e-05		3.5375e-08	0.0548424	2.53069	0.185794	-0.470166	0.185198
3.54e-08	0.122029	0.113627	0.0290304	0.0178731	0.0153817	7.62021e-05		3.54e-08	-0.965632	-0.469762	0.789133	0.125205	-0.132006
3.5425e-08	0.130307	0.110745	0.0301578	0.0205541	0.0157615	7.62021e-05		3.5425e-08	0.483783	-0.861381	1.39374	0.88498	0.102211
3.545e-08	0.138318	0.111569	0.0248027	0.0241287	0.0140524	0		3.545e-08	1.88945	-0.718687	-1.30183	-0.641071	-0.87834
3.5475e-08	0.122029	0.109922	0.0288895	0.021269	0.0121534	0		3.5475e-08	-0.873605	-0.932683	0.810488	-0.943677	-1.97092
3.55e-08	0.119092	0.116509	0.0243799	0.0201966	0.0132928	0		3.55e-08	-1.34744	0.0433725	-1.46018	-0.510237	-1.29508
3.5525e-08	0.122029	0.115685	0.0243799	0.0162645	0.012913	0		3.5525e-08	-0.812267	-0.0513543	-1.43177	0.169841	-1.50396
3.555e-08	0.115621	0.118567	0.0270575	0.016622	0.0178504	7.62021e-05		3.555e-08	-1.88397	0.390192	-0.0338706	0.195007	1.38909
3.5575e-08	0.115354	0.120214	0.0269166	0.0187668	0.0165211	0		3.5575e-08	-1.9001	0.653384	-0.0762098	-0.0261924	0.627461
3.56e-08	0.121762	0.112392	0.0287486	0.0243074	0.0172807	7.62021e-05		3.56e-08	-0.766395	-0.456025	0.892595	-0.494498	1.08523
3.5625e-08	0.136716	0.109098	0.0250846	0.0225201	0.0161413	0		3.5625e-08	1.84184	-0.909967	-0.9568	-0.6347	0.433229
3.565e-08	0.121228	0.123096	0.0286077	0.0187668	0.0151918	0		3.565e-08	-0.797335	1.14617	0.881752	-0.116324	-0.108638
3.5675e-08	0.123632	0.105805	0.0233935	0.0201966	0.0151918	0		3.5675e-08	-0.351922	-1.3413	-1.76889	0.403079	-0.0952817
3.57e-08	0.131375	0.10457	0.0249436	0.0221626	0.0134827	0		3.57e-08	1.01667	-1.49761	-0.943011	3.23441	-1.08355
3.5725e-08	0.124433	0.124743	0.0232525	0.021269	0.0169009	7.62021e-05		3.5725e-08	-0.151692	1.46116	-1.78583	0.370954	0.933836
3.575e-08	0.138585	0.112804	0.0246618	0.0244861	0.0150019	7.62021e-05		3.575e-08	2.3276	-0.252215	-1.03106	1.71932	-0.166635
3.5775e-08	0.125234	0.116509	0.0222661	0.0216265	0.0174706	0		3.5775e-08	0.0489102	0.311765	-2.23991	-0.323844	1.2967
3.58e-08	0.126569	0.10951	0.027903	0.0200179	0.0134827	0		3.58e-08	0.311241	-0.684547	0.701604	0.280568	-1.03309
3.5825e-08	0.123364	0.122273	0.0286077	0.0191242	0.0155716	0		3.5825e-08	-0.213114	1.20169	1.09649	0.0565862	0.2083
3.585e-08	0.124433	0.105393	0.0240981	0.0189455	0.0132928	0		3.585e-08	0.00296588	-1.23856	-1.20949	-0.500077	-1.11971
3.5875e-08	0.136983	0.111157	0.0257892	0.0219839	0.0153817	0		3.5875e-08	2.21282	-0.37296	-0.304257	0.355175	0.123426
3.59e-08	0.121495	0.11198	0.0238162	0.0205541	0.0159514	0		3.59e-08	-0.445531	-0.228704	-1.29965	-1.45054	0.472723
3.5925e-08	0.126836	0.109098	0.026212	0.0182306	0.0169009	0		3.5925e-08	0.513587	-0.626585	-0.0263827	1.73763	1.04661
3.595e-08	0.12016	0.112804	0.0245209	0.0214477	0.0157615	7.62021e-05		3.595e-08	-0.616657	-0.0602291	-0.877044	1.59713	0.38796
3.5975e-08	0.126569	0.11198	0.0269166	0.0173369	0.0136726	7.62021e-05		3.5975e-08	0.529627	-0.156893	0.399285	-0.129493	-0.832742
3.6e-08	0.116689	0.112392	0.0267756	0.0184093	0.0184201	0		3.6e-08	-1.16064	-0.072574	0.355453	-1.19132	1.98729
3.6025e-08	0.128705	0.117744	0.024239	0.0203753	0.0163312	0		3.6025e-08	0.964553	0.73702	-0.939238	1.75903	0.765912
3.605e-08	0.128438	0.116509	0.0273393	0.0196604	0.0165211	0		3.605e-08	0.949415	0.580096	0.709057	0.278195	0.892215
3.6075e-08	0.12737	0.122684	0.0252255	0.0226988	0.0132928	0		3.6075e-08	0.794312	1.51228	-0.367042	-1.03812	-1.00714
3.61e-08	0.122029	0.121449	0.0218433	0.0187668	0.0127231	0		3.61e-08	-0.107629	1.35562	-2.10975	0.243379	-1.33254
3.6125e-08	0.1247	0.113627	0.0246618	0.0200179	0.0146221	7.62021e-05		3.6125e-08	0.389914	0.228946	-0.605372	0.519741	-0.193182
3.615e-08	0.119359	0.105805	0.0257892	0.018588	0.0153817	0		3.615e-08	-0.513677	-0.899379	0.0146379	0.376326	0.271078
3.6175e-08	0.128171	0.123096	0.0271984	0.0219839	0.012913	0		3.6175e-08	1.05973	1.67316	0.78402	0.148443	-1.18296
3.62e-08	0.112417	0.116097	0.024239	0.0203753	0.0163312	7.62021e-05		3.62e-08	-1.6697	0.665687	-0.742742	1.26775	0.862742
3.6225e-08	0.1247	0.102511	0.0252255	0.0200179	0.0132928	0		3.6225e-08	0.513838	-1.31585	-0.19525	0.281389	-0.932202
3.625e-08	0.12016	0.112392	0.0215614	0.0203753	0.0123433	0.000152404		3.625e-08	-0.251812	0.166964	-2.09791	0.221379	-1.48537
3.6275e-08	0.129773	0.101276	0.0256483	0.0210903	0.0127231	0		3.6275e-08	1.46682	-1.45267	0.0849983	0.921554	-1.24686
3.63e-08	0.117223	0.121037	0.0249436	0.0194817	0.0178504	7.62021e-05		3.63e-08	-0.707241	1.49412	-0.258433	-1.42157	1.82454
3.6325e-08	0.111348	0.10704	0.0246618	0.0201966	0.0172807	0		3.6325e-08	-1.71042	-0.553727	-0.379127	0.886713	1.49888
3.635e-08	0.11482	0.11445	0.0253664	0.0180518	0.0134827	0		3.635e-08	-1.07022	0.567729	0.0220353	0.233547	-0.756312
3.6375e-08	0.112417	0.108687	0.0245209	0.021269	0.0134827	0		3.6375e-08	-1.46379	-0.262816	-0.397436	-1.60862	-0.743763
3.64e-08	0.119359	0.100453	0.0274803	0.0196604	0.0140524	0		3.64e-08	-0.210746	-1.46115	1.20057	1.47059	-0.390291
3.6425e-08	0.12737	0.106628	0.0232525	0.0176944	0.0174706	0		3.6425e-08	1.23246	-0.521395	-1.01467	1.58092	1.66957
3.645e-08	0.115087	0.109922	0.0235344	0.0210903	0.0127231	7.62021e-05		3.645e-08	-0.904223	-0.00857732	-0.837397	0.244945	-1.16133
3.6475e-08	0.115621	0.0967476	0.0218433	0.0176944	0.0150019	7.62021e-05		3.6475e-08	-0.78011	-1.94414	-1.70976	0.26901	0.217636
3.65e-08	0.12016	0.114862	0.0256483	0.0207328	0.0138625	0		3.65e-08	0.0521059	0.774091	0.34388	-0.0479799	-0.452993
3.6525e-08	0.124433	0.0979827	0.0215614	0.0194817	0.0134827	0		3.6525e-08	0.838221	-1.71566	-1.80693	0.146392	-0.66839
3.655e-08	0.116155	0.0996295	0.0240981	0.0201966	0.0140524	0		3.655e-08	-0.596108	-1.44784	-0.426341	-0.598694	-0.31339
3.6575e-08	0.119893	0.102923	0.0240981	0.0193029	0.0153817	0		3.6575e-08	0.0959434	-0.934055	-0.398577	-0.319127	0.499046
3.66e-08	0.119626	0.116921	0.0259301	0.0203753	0.0146221	0		3.66e-08	0.0789309	1.17813	0.609322	-0.809511	0.0551534
3.6625e-08	0.115354	0.0971593	0.0246618	0.018588	0.0193695	0		3.6625e-08	-0.648658	-1.74916	-0.0411446	-0.529706	2.9283
3.665e-08	0.127637	0.104981	0.0256483	0.0191242	0.0125332	0		3.665e-08	1.56158	-0.557636	0.515859	0.60841	-1.17814
3.6675e-08	0.123364	0.105393	0.0243799	0.0194817	0.0123433	0		3.6675e-08	0.833957	-0.472895	-0.136167	-1.17062	-1.2806
3.67e-08	0.125234	0.109098	0.0263529	0.0187668	0.0125332	7.62021e-05		3.67e-08	1.19707	0.104969	0.95185	0.0550364	-1.1539
3.6725e-08	0.12283	0.114039	0.0246618	0.0219839	0.0132928	0		3.6725e-08	0.800603	0.868656	0.0713827	1.11105	-0.682795
3.675e-08	0.116689	0.113215	0.0212796	0.0150134	0.0138625	7.62021e-05		3.675e-08	-0.262007	0.769362	-1.72159	0.27438	-0.325835
3.6775e-08	0.115354	0.103746	0.026071	0.0182306	0.0106343	0.000152404		3.6775e-08	-0.469913	-0.627132	0.887108	-0.0467858	-2.26669
3.68e-08	0.110547	0.106217	0.0250846	0.0200179	0.0146221	0		3.68e-08	-1.29706	-0.233301	0.383653	1.18471	0.159596
3.6825e-08	0.109746	0.101688	0.0238162	0.0219839	0.014812	0		3.6825e-08	-1.41084	-0.890419	-0.273189	2.15944	0.287722
3.685e-08	0.112951	0.103335	0.0239572	0.0221626	0.0151918	0		3.685e-08	-0.809734	-0.620077	-0.169487	-0.409321	0.531185
3.6875e-08	0.119359	0.104158	0.0250846	0.016622	0.0131029	7.62021e-05		3.6875e-08	0.364696	-0.473252	0.468349	1.25813	-0.723366
3.69e-08	0.119359	0.104981	0.0235344	0.0168007	0.0121534	0		3.69e-08	0.394967	-0.326234	-0.343362	0.849378	-1.28774
3.6925e-08	0.118558	0.0967476	0.0253664	0.0209115	0.0113938	0		3.6925e-08	0.281928	-1.5437	0.677779	-0.86124	-1.73753
3.695e-08	0.11482	0.112804	0.0252255	0.0194817	0.0121534	7.62021e-05		3.695e-08	-0.357215	0.899521	0.629713	2.98123	-1.26388
3.6975e-08	0.130841	0.0963359	0.0232525	0.0182306	0.014812	0		3.6975e-08	2.54322	-1.5613	-0.414384	-0.382027	0.366479
3.7e-08	0.114286	0.106628	0.0233935	0.0168007	0.0163312	0		3.7e-08	-0.393512	0.0150538	-0.310507	0.0757152	1.30512
3.7025e-08	0.104139	0.104158	0.0221251	0.0189455	0.0113938	0		3.7025e-08	-2.18459	-0.3349	-0.974179	-1.0332	-1.69117
3.705e-08	0.110013	0.104158	0.026212	0.0214477	0.0142423	7.62021e-05		3.705e-08	-1.10142	-0.311872	1.28086	-0.662518	0.0583001
3.7075e-08	0.116956	0.106628	0.0231116	0.0182306	0.0136726	0.000152404		3.7075e-08	0.175169	0.0849534	-0.382781	-0.378423	-0.27668
3.71e-08	0.119626	0.10704	0.0219842	0.0191242	0.0140524	0		3.71e-08	0.685274	0.170589	-0.971858	0.0808718	-0.0320258
3.7125e-08	0.111348	0.102923	0.0235344	0.018588	0.0140524	0		3.7125e-08	-0.774016	-0.429984	-0.0974948	-0.0709949	-0.0192637
3.715e-08	0.116956	0.102923	0.0229707	0.0187668	0.0121534	0		3.715e-08	0.265013	-0.40708	-0.378907	0.126879	-1.16854
3.7175e-08	0.109212	0.10457	0.0217024	0.018588	0.0136726	7.62021e-05		3.7175e-08	-1.10048	-0.134234	-1.04722	1.1136	-0.226307
3.72e-08	0.118825	0.097571	0.0233935	0.0171582	0.0136726	7.62021e-05		3.72e-08	0.662069	-1.17409	-0.0929463	-0.528628	-0.213701
3.7225e-08	0.115354	0.10951	0.0232525	0.0182306	0.0136726	0		3.7225e-08	0.0658618	0.662858	-0.143151	-0.594071	-0.20109
3.725e-08	0.107877	0.0996295	0.0245209	0.0207328	0.0146221	7.62021e-05		3.725e-08	-1.2546	-0.816328	0.581436	2.41583	0.39427
3.7275e-08	0.113752	0.101688	0.026212	0.0160858	0.0121534	7.62021e-05		3.7275e-08	-0.164122	-0.480474	1.54019	-0.725538	-1.10896
3.73e-08	0.115888	0.0889255	0.0226888	0.0205541	0.0115837	7.62021e-05		3.73e-08	0.251761	-2.40169	-0.372639	1.49768	-1.44723
3.7325e-08	0.110547	0.101688	0.0211387	0.0184093	0.0138625	0		3.7325e-08	-0.684975	-0.434984	-1.20116	0.464213	-0.0338842
3.735e-08	0.112417	0.101688	0.0226888	0.0191242	0.0140524	0		3.735e-08	-0.317337	-0.412243	-0.319311	0.487316	0.095677
3.7375e-08	0.116689	0.108687	0.0215614	0.0178731	0.0125332	0		3.7375e-08	0.486356	0.678868	-0.915898	1.39354	-0.827433
3.74e-08	0.120694	0.0951009	0.0215614	0.0128686	0.0112039	0		3.74e-08	1.24274	-1.37298	-0.88986	-0.0852801	-1.63486
3.7425e-08	0.112684	0.101688	0.0255073	0.0187668	0.0138625	0		3.7425e-08	-0.180762	-0.343959	1.3222	0.202693	0.0167846
3.745e-08	0.104139	0.0971593	0.0207159	0.0176944	0.0134827	0		3.745e-08	-1.70333	-1.01397	-1.30666	0.845521	-0.205021
3.7475e-08	0.107343	0.118979	0.0233935	0.0189455	0.0163312	0		3.7475e-08	-1.09258	2.34876	0.205382	0.51427	1.56744
3.75e-08	0.107877	0.100453	0.0215614	0.0178731	0.0134827	7.62021e-05		3.75e-08	-0.966691	-0.464829	-0.785671	1.1586	-0.179997
3.7525e-08	0.116155	0.1021	0.0238162	0.0198391	0.0131029	0		3.7525e-08	0.568848	-0.189734	0.494712	-0.77231	-0.4025
3.755e-08	0.118558	0.097571	0.0218433	0.0171582	0.0115837	7.62021e-05		3.755e-08	1.03646	-0.861753	-0.576796	0.227595	-1.33091
3.7575e-08	0.106008	0.104981	0.0240981	0.0196604	0.012913	0		3.7575e-08	-1.22108	0.298306	0.706325	0.339218	-0.495547
3.76e-08	0.100401	0.105805	0.0225479	0.0171582	0.0132928	7.62021e-05		3.76e-08	-2.21547	0.447918	-0.131403	-0.885629	-0.247797
3.7625e-08	0.111883	0.101276	0.0238162	0.018588	0.0140524	7.62021e-05		3.7625e-08	-0.091697	-0.2252	0.603663	-0.685802	0.236007
3.765e-08	0.118825	0.102511	0.0225479	0.0207328	0.0136726	0		3.765e-08	1.20585	-0.0124483	-0.0783865	0.0501037	0.0128684
3.7675e-08	0.100401	0.107863	0.0229707	0.0173369	0.0138625	7.62021e-05		3.7675e-08	-2.13208	0.834527	0.184838	1.50245	0.143471
3.77e-08	0.101202	0.111157	0.0195885	0.0169794	0.0123433	7.62021e-05		3.77e-08	-1.95771	1.36551	-1.68384	0.72105	-0.788784
3.7725e-08	0.102804	0.0996295	0.0211387	0.0207328	0.0134827	0		3.7725e-08	-1.63647	-0.388238	-0.789372	-0.599262	-0.0675908
3.775e-08	0.113218	0.0901606	0.0233935	0.0144772	0.012913	0		3.775e-08	0.299504	-1.82692	0.502599	-0.308697	-0.409963
3.7775e-08	0.117223	0.0926307	0.0229707	0.0191242	0.0110141	7.62021e-05		3.7775e-08	1.0633	-1.42399	0.291874	1.05915	-1.58152
3.78e-08	0.119092	0.109922	0.022407	0.016622	0.012913	0		3.78e-08	1.43621	1.26992	0.00130691	0.633232	-0.385513
3.7825e-08	0.116155	0.106628	0.0202931	0.0180518	0.0119635	0		3.7825e-08	0.927172	0.784211	-1.16326	0.56603	-0.966072
3.785e-08	0.110547	0.103746	0.0240981	0.0182306	0.0112039	0		3.785e-08	-0.0732347	0.361486	1.00764	-1.75134	-1.42887
3.7875e-08	0.109212	0.113215	0.0209977	0.0196604	0.0136726	7.62021e-05		3.7875e-08	-0.289605	1.85097	-0.715314	-0.199559	0.126023
3.79e-08	0.108945	0.102923	0.0208568	0.0184093	0.0140524	0		3.79e-08	-0.309795	0.279819	-0.769441	-0.267931	0.376215
3.7925e-08	0.0990654	0.107863	0.020575	0.0151921	0.0112039	7.62021e-05		3.7925e-08	-2.09995	1.06897	-0.903439	-0.155933	-1.39463
3.795e-08	0.107877	0.092219	0.0211387	0.0178731	0.0142423	0		3.795e-08	-0.448732	-1.33577	-0.558917	1.04054	0.520696
3.7975e-08	0.102537	0.0942775	0.0240981	0.0173369	0.0119635	0		3.7975e-08	-1.40462	-0.994322	1.14441	-0.293151	-0.895444
3.8e-08	0.106275	0.0979827	0.0211387	0.0175156	0.0119635	7.62021e-05		3.8e-08	-0.686747	-0.396455	-0.507727	0.452788	-0.883661
3.8025e-08	0.114019	0.092219	0.0236753	0.0173369	0.0153817	0		3.8025e-08	0.77168	-1.27067	0.958856	-0.793636	1.27476
3.805e-08	0.113752	0.100865	0.0202931	0.0162645	0.0125332	7.62021e-05		3.805e-08	0.75191	0.0967931	-0.93754	1.40459	-0.50208
3.8075e-08	0.10494	0.101688	0.020575	0.0169794	0.0106343	0		3.8075e-08	-0.847979	0.24769	-0.75211	1.06455	-1.68441
3.81e-08	0.109212	0.109098	0.0233935	0.0148347	0.0113938	0		3.81e-08	-0.0290477	1.42562	0.879201	-0.18518	-1.19518
3.8125e-08	0.103071	0.086867	0.0194476	0.0159071	0.0140524	7.62021e-05		3.8125e-08	-1.1374	-2.01894	-1.34495	0.109318	0.490863
3.815e-08	0.0913218	0.106217	0.0231116	0.0178731	0.0125332	0		3.815e-08	-3.28649	1.02288	0.771919	0.677588	-0.454013
3.8175e-08	0.111081	0.0930424	0.0218433	0.0201966	0.0150019	7.62021e-05		3.8175e-08	0.404382	-1.01201	0.0735816	-0.211684	1.11526
3.82e-08	0.110013	0.102511	0.0222661	0.0151921	0.0144322	0		3.82e-08	0.235389	0.490161	0.341466	-1.83279	0.768811
3.8225e-08	0.10761	0.0971593	0.0221251	0.016622	0.0113938	0		3.8225e-08	-0.181823	-0.324314	0.286931	0.0139919	-1.13772
3.825e-08	0.103872	0.100453	0.0222661	0.0159071	0.0104444	0		3.825e-08	-0.8478	0.213596	0.393819	-0.69583	-1.7265
3.8275e-08	0.108144	0.103335	0.0200113	0.0182306	0.0112039	0		3.8275e-08	-0.0250049	0.687733	-0.874396	-0.583389	-1.23487
3.83e-08	0.110013	0.0983944	0.018743	0.0182306	0.0115837	0		3.83e-08	0.351651	-0.0639605	-1.57847	-0.287565	-0.983012
3.8325e-08	0.110814	0.10457	0.0212796	0.0153709	0.0127231	7.62021e-05		3.8325e-08	0.529866	0.927354	-0.0953648	0.10048	-0.249519
3.835e-08	0.104139	0.100041	0.0226888	0.0148347	0.0142423	0		3.835e-08	-0.685164	0.239317	0.741584	-1.43851	0.725856
3.8375e-08	0.109479	0.0893372	0.0236753	0.0162645	0.0112039	7.62021e-05		3.8375e-08	0.339112	-1.42011	1.33653	0.603043	-1.18933
3.84e-08	0.100134	0.0934541	0.0194476	0.0162645	0.0117736	7.62021e-05		3.84e-08	-1.37623	-0.751388	-1.07602	2.00473	-0.816188
3.8425e-08	0.106542	0.104981	0.0253664	0.0155496	0.0112039	0		3.8425e-08	-0.15154	1.08441	2.36723	0.831238	-1.16657
3.845e-08	0.121228	0.0951009	0.018743	0.0173369	0.0136726	0		3.845e-08	2.62206	-0.448405	-1.4346	0.392675	0.414792
3.8475e-08	0.110013	0.0876904	0.0188839	0.0171582	0.0144322	0		3.8475e-08	0.554968	-1.5942	-1.32903	0.13771	0.910775
3.85e-08	0.103338	0.0942775	0.0229707	0.0180518	0.0142423	0		3.85e-08	-0.665464	-0.534227	1.063	0.71326	0.802745
3.8525e-08	0.101202	0.0971593	0.0201522	0.0159071	0.0121534	0		3.8525e-08	-1.03743	-0.0575187	-0.54533	1.10501	-0.515821
3.855e-08	0.108678	0.117744	0.0219842	0.0184093	0.0121534	0		3.855e-08	0.391881	3.21568	0.543111	0.109609	-0.503995
3.8575e-08	0.102804	0.0786332	0.0188839	0.0148347	0.0117736	0		3.8575e-08	-0.681206	-2.9411	-1.23306	-0.609975	-0.734605
3.86e-08	0.118558	0.0934541	0.0236753	0.0196604	0.0142423	7.62021e-05		3.86e-08	2.30413	-0.576919	1.57865	-1.14562	0.853972
3.8625e-08	0.113485	0.0905723	0.0209977	0.0155496	0.012913	0		3.8625e-08	1.38127	-1.01126	0.0460081	0.730333	0.0170155
3.865e-08	0.101202	0.0909839	0.018602	0.0159071	0.0132928	0.000152404		3.865e-08	-0.898204	-0.924577	-1.32551	-1.3842	0.272151
3.8675e-08	0.106542	0.103335	0.0212796	0.0187668	0.0117736	0		3.8675e-08	0.13429	1.05461	0.261016	1.79684	-0.688071
3.87e-08	0.113218	0.108275	0.0212796	0.0178731	0.0125332	0		3.87e-08	1.41958	1.8612	0.28646	0.237553	-0.189778
3.8725e-08	0.0998665	0.0959242	0.020575	0.016622	0.0125332	0		3.8725e-08	-1.06607	-0.075764	-0.100198	1.19051	-0.177768
3.875e-08	0.103605	0.0992178	0.0214205	0.0160858	0.0125332	0		3.875e-08	-0.333613	0.469511	0.419796	-0.838786	-0.165758
3.8775e-08	0.0971963	0.0955126	0.018743	0.0134048	0.0119635	7.62021e-05		3.8775e-08	-1.51443	-0.0970279	-1.12394	0.76828	-0.519551
3.88e-08	0.110013	0.10951	0.0219842	0.0141197	0.0146221	0		3.88e-08	0.932624	2.15171	0.801346	-0.050899	1.20048
3.8825e-08	0.106008	0.100865	0.0174746	0.0157283	0.0112039	0		3.8825e-08	0.204936	0.799013	-1.8212	0.157047	-0.984562
3.885e-08	0.119092	0.0913956	0.0228298	0.0171582	0.00911508	0		3.885e-08	2.7071	-0.686848	1.34987	-0.477222	-2.31744
3.8875e-08	0.0961282	0.0897489	0.0190248	0.0153709	0.0134827	0		3.8875e-08	-1.60733	-0.927839	-0.862969	0.948847	0.505642
3.89e-08	0.103605	0.0901606	0.0195885	0.0205541	0.0104444	0		3.89e-08	-0.16461	-0.84079	-0.506943	1.06445	-1.44005
3.8925e-08	0.0977303	0.0930424	0.0211387	0.0169794	0.0125332	0		3.8925e-08	-1.24944	-0.359258	0.43149	-1.26099	-0.0818542
3.895e-08	0.100668	0.0881021	0.0219842	0.0157283	0.0121534	7.62021e-05		3.895e-08	-0.665124	-1.12681	0.955885	0.0744329	-0.314988
3.8975e-08	0.105207	0.0864553	0.0228298	0.0146559	0.0131029	0		3.8975e-08	0.223983	-1.3689	1.4813	0.753892	0.310099
3.9e-08	0.100134	0.0831618	0.0190248	0.0153709	0.0110141	0		3.9e-08	-0.710904	-1.87488	-0.743105	0.210422	-1.02782
3.9025e-08	0.108945	0.0913956	0.018602	0.0162645	0.0125332	0		3.9025e-08	0.991131	-0.535887	-0.96953	-0.522703	-0.0338713
3.905e-08	0.102537	0.0905723	0.0198703	0.0173369	0.0106343	0		3.905e-08	-0.198532	-0.646281	-0.194147	-1.16298	-1.25115
3.9075e-08	0.0977303	0.0876904	0.0181793	0.0176944	0.0151918	0		3.9075e-08	-1.0851	-1.08695	-1.17316	0.273249	1.71232
3.91e-08	0.111348	0.0996295	0.0209977	0.0135836	0.0121534	0		3.91e-08	1.53539	0.849967	0.524197	-1.50208	-0.24416
3.9125e-08	0.0998665	0.0811033	0.0209977	0.0173369	0.014812	0		3.9125e-08	-0.623336	-2.1025	0.54926	0.315048	1.49239
3.915e-08	0.100668	0.0942775	0.0240981	0.0164433	0.014812	0		3.915e-08	-0.442923	0.0349122	2.41955	-1.08488	1.50545
3.9175e-08	0.109479	0.0979827	0.0170519	0.0155496	0.0163312	7.62021e-05		3.9175e-08	1.26638	0.652666	-1.75142	-1.3498	2.50555
3.92e-08	0.101736	0.0988061	0.0202931	0.0182306	0.0106343	7.62021e-05		3.92e-08	-0.183373	0.807516	0.204328	-1.33053	-1.18476
3.9225e-08	0.106008	0.0839852	0.018743	0.0162645	0.0104444	0		3.9225e-08	0.66103	-1.55692	-0.696459	1.34875	-1.29724
3.925e-08	0.100935	0.0913956	0.0191657	0.011975	0.0134827	0		3.925e-08	-0.280664	-0.341916	-0.420117	-0.721439	0.69219
3.9275e-08	0.100134	0.104158	0.0177565	0.0160858	0.0121534	0		3.9275e-08	-0.406148	1.73797	-1.23926	-0.41609	-0.16158
3.93e-08	0.103872	0.0885138	0.0184611	0.0141197	0.0117736	0		3.93e-08	0.337469	-0.763956	-0.794293	1.22368	-0.39746
3.9325e-08	0.107877	0.104981	0.0208568	0.013941	0.0102545	0		3.9325e-08	1.13327	1.91699	0.665251	0.00544937	-1.37727
3.935e-08	0.107343	0.0811033	0.0214205	0.0176944	0.0112039	0		3.935e-08	1.05958	-1.91933	1.0284	0.598603	-0.746321
3.9375e-08	0.101469	0.0806916	0.022407	0.0184093	0.0100646	7.62021e-05		3.9375e-08	-0.0392022	-1.96559	1.6462	0.619529	-1.47966
3.94e-08	0.103338	0.0913956	0.0209977	0.0159071	0.0132928	0		3.94e-08	0.347657	-0.212705	0.824695	-0.698628	0.642522
3.9425e-08	0.105474	0.0967476	0.0211387	0.0159071	0.0110141	0		3.9425e-08	0.786368	0.675778	0.934545	0.0869558	-0.836649
3.945e-08	0.0985314	0.0901606	0.0191657	0.0144772	0.0110141	0		3.945e-08	-0.520468	-0.369781	-0.229091	0.203194	-0.825408
3.9475e-08	0.105474	0.0856319	0.0214205	0.0146559	0.00987467	0		3.9475e-08	0.843291	-1.08297	1.15477	0.70334	-1.56101
3.95e-08	0.0971963	0.0963359	0.022407	0.0159071	0.0132928	0		3.95e-08	-0.722612	0.675529	1.77562	-1.77228	0.691885
3.9525e-08	0.111081	0.0864553	0.0208568	0.0180518	0.00930498	0		3.9525e-08	1.98102	-0.907461	0.864552	-0.215923	-1.91361
3.955e-08	0.100668	0.0753396	0.0212796	0.0180518	0.0108242	7.62021e-05		3.955e-08	0.00152904	-2.69357	1.14516	1.82443	-0.905202
3.9575e-08	0.105741	0.102511	0.0190248	0.0175156	0.0136726	7.62021e-05		3.9575e-08	1.00856	1.74651	-0.195297	0.883315	0.978564
3.96e-08	0.093992	0.0959242	0.0181793	0.0173369	0.0113938	0		3.96e-08	-1.23245	0.696939	-0.684213	2.06102	-0.508148
3.9625e-08	0.100401	0.0864553	0.0191657	0.0150134	0.0123433	0		3.9625e-08	0.0331397	-0.823685	-0.0624027	0.635764	0.12838
3.965e-08	0.0947931	0.101276	0.0193067	0.0123324	0.012913	0		3.965e-08	-1.02383	1.61366	0.0470013	0.27012	0.515594
3.9675e-08	0.0995995	0.105805	0.0195885	0.013941	0.0132928	0		3.9675e-08	-0.0664687	2.37525	0.242293	-0.0962588	0.778155
3.97e-08	0.0934579	0.0971593	0.018602	0.016622	0.0140524	7.62021e-05		3.97e-08	-1.22852	0.986921	-0.3341	0.697858	1.2917
3.9725e-08	0.104673	0.0823384	0.0201522	0.0164433	0.0106343	0		3.9725e-08	0.972325	-1.41247	0.633932	-1.703	-0.9527
3.975e-08	0.0982644	0.0794566	0.0163472	0.0153709	0.0121534	0		3.975e-08	-0.242528	-1.8632	-1.66253	-0.230287	0.0622447
3.9775e-08	0.11215	0.0872787	0.0170519	0.0168007	0.0127231	0		3.9775e-08	2.48045	-0.563134	-1.21031	-0.210542	0.450763
3.98e-08	0.103605	0.0839852	0.0208568	0.0151921	0.0110141	0		3.98e-08	0.849821	-1.0814	1.13767	1.07206	-0.668238
3.9825e-08	0.0915888	0.0983944	0.014938	0.0148347	0.0127231	0		3.9825e-08	-1.45804	1.30042	-2.45884	1.48192	0.47485
3.985e-08	0.0985314	0.0992178	0.0209977	0.0164433	0.0108242	0		3.985e-08	-0.0809062	1.45779	1.27346	0.627205	-0.771686
3.9875e-08	0.0979973	0.0839852	0.0195885	0.0168007	0.0104444	0		3.9875e-08	-0.157433	-1.01948	0.434344	1.32962	-1.01248
3.99e-08	0.0915888	0.0848086	0.0163472	0.0160858	0.0123433	0		3.99e-08	-1.37859	-0.863601	-1.5308	-0.502181	0.258867
3.9925e-08	0.0929239	0.0860436	0.0193067	0.0142985	0.00987467	7.62021e-05		3.9925e-08	-1.09179	-0.639859	0.309181	1.2742	-1.36903
3.995e-08	0.0987984	0.0839852	0.0193067	0.0160858	0.0121534	0		3.995e-08	0.0810602	-0.957467	0.333013	0.513559	0.156359
3.9975e-08	0.0995995	0.0930424	0.0191657	0.0184093	0.0104444	0		3.9975e-08	0.265	0.553837	0.270085	0.240428	-0.968749
4e-08	0.103071	0.0889255	0.0183202	0.0130474	0.0119635	0		4e-08	0.970876	-0.102461	-0.22723	-0.131179	0.0534982
4.0025e-08	0.104139	0.0876904	0.0238162	0.0150134	0.00987467	0		4.0025e-08	1.20782	-0.284779	3.18596	0.280375	-1.3264
4.005e-08	0.101202	0.097571	0.018602	0.0135836	0.0102545	0		4.005e-08	0.661351	1.36597	-0.0069638	-0.876737	-1.06255
4.0075e-08	0.0982644	0.0819267	0.0178974	0.0146559	0.00873528	0		4.0075e-08	0.114044	-1.19395	-0.419203	-0.563416	-2.06527
4.01e-08	0.0931909	0.0806916	0.0195885	0.0151921	0.0106343	7.62021e-05		4.01e-08	-0.852659	-1.37756	0.649881	-0.347817	-0.787341
4.0125e-08	0.10227	0.0798683	0.0180383	0.0134048	0.0136726	0		4.0125e-08	0.954224	-1.49342	-0.286279	0.458379	1.25372
4.015e-08	0.0902537	0.0913956	0.0190248	0.0130474	0.0104444	0		4.015e-08	-1.37562	0.433515	0.348213	0.0845142	-0.892308
4.0175e-08	0.0921228	0.0905723	0.0178974	0.0169794	0.0121534	0		4.0175e-08	-0.982271	0.318768	-0.327851	0.695504	0.262194
4.02e-08	0.0902537	0.0745163	0.0184611	0.0128686	0.00930498	7.62021e-05		4.02e-08	-1.32298	-2.31948	0.04519	-1.35604	-1.63342
4.0225e-08	0.0950601	0.0839852	0.0209977	0.0162645	0.0115837	0		4.0225e-08	-0.351493	-0.73026	1.64578	-0.251566	-0.0960329
4.025e-08	0.103872	0.0901606	0.0163472	0.0162645	0.0138625	0		4.025e-08	1.40953	0.314848	-1.22422	-0.627689	1.4436
4.0275e-08	0.0910547	0.0897489	0.0184611	0.0160858	0.00892518	0		4.0275e-08	-1.08626	0.267889	0.114732	2.35937	-1.85722
4.03e-08	0.0921228	0.0843969	0.020434	0.0171582	0.0138625	0		4.03e-08	-0.849376	-0.599924	1.36842	0.00420278	1.4688
4.0325e-08	0.103605	0.101276	0.0177565	0.0180518	0.0119635	0		4.0325e-08	1.44149	2.22698	-0.278989	0.122706	0.205125
4.035e-08	0.100134	0.0835735	0.0146561	0.0151921	0.00987467	7.62021e-05		4.035e-08	0.784587	-0.695564	-2.194	0.340612	-1.18815
4.0375e-08	0.0910547	0.081515	0.0157835	0.0146559	0.00987467	7.62021e-05		4.0375e-08	-0.980709	-1.0177	-1.46798	-1.92412	-1.17754
4.04e-08	0.0995995	0.0889255	0.0194476	0.0137623	0.0112039	7.62021e-05		4.04e-08	0.734387	0.237319	0.848043	1.27465	-0.271569
4.0425e-08	0.0987984	0.081515	0.0156426	0.0144772	0.0121534	0		4.0425e-08	0.60358	-0.976995	-1.51345	0.6981	0.379717
4.045e-08	0.0934579	0.0778098	0.0198703	0.0146559	0.00930498	0.000152404		4.045e-08	-0.425841	-1.57486	1.16088	-0.0787918	-1.52997
4.0475e-08	0.105207	0.0889255	0.0169109	0.0148347	0.0119635	0		4.0475e-08	1.92788	0.301095	-0.674049	-0.757507	0.275041
4.05e-08	0.0899866	0.0741046	0.018743	0.0135836	0.0119635	0		4.05e-08	-1.06029	-2.15415	0.50002	0.558393	0.286708
4.0525e-08	0.0902537	0.0934541	0.0214205	0.0134048	0.0115837	7.62021e-05		4.0525e-08	-0.981071	1.10084	2.20858	1.57708	0.0416111
4.055e-08	0.10227	0.0757513	0.0197294	0.0123324	0.0132928	0		4.055e-08	1.43015	-1.83971	1.16802	-1.20196	1.20933
4.0575e-08	0.0795728	0.0934541	0.0178974	0.0130474	0.00968477	7.62021e-05		4.0575e-08	-3.04999	1.14437	0.0364166	0.517461	-1.22114
4.06e-08	0.104406	0.0811033	0.0169109	0.0150134	0.0113938	0		4.06e-08	1.91068	-0.903585	-0.5637	-2.3682	-0.0526837
4.0625e-08	0.0921228	0.0819267	0.0198703	0.0153709	0.0108242	0		4.0625e-08	-0.504218	-0.745228	1.32857	-0.245585	-0.427597
4.065e-08	0.0995995	0.0893372	0.0195885	0.0123324	0.0119635	7.62021e-05		4.065e-08	1.01053	0.518785	1.17422	3.48702	0.356576
4.0675e-08	0.093992	0.0827501	0.0201522	0.0123324	0.0121534	0		4.0675e-08	-0.0787988	-0.56616	1.55495	0.0934781	0.497166
4.07e-08	0.0915888	0.0835735	0.0164882	0.011975	0.0121534	0		4.07e-08	-0.530996	-0.407269	-0.743415	0.313743	0.508913
4.0725e-08	0.0923899	0.0860436	0.0193067	0.0144772	0.0113938	0		4.0725e-08	-0.344697	0.0287829	1.06674	0.433736	0.0041305
4.075e-08	0.094526	0.0794566	0.0153608	0.0126899	0.00968477	7.62021e-05		4.075e-08	0.108338	-1.05896	-1.4159	0.0501267	-1.14755
4.0775e-08	0.0953271	0.0909839	0.0184611	0.0150134	0.0138625	7.62021e-05		4.0775e-08	0.295261	0.902653	0.576269	1.58194	1.70808
4.08e-08	0.0985314	0.0860436	0.0202931	0.0153709	0.0108242	0		4.08e-08	0.962804	0.0914388	1.76517	0.0881223	-0.350023
4.0825e-08	0.0891856	0.0835735	0.0152198	0.0114388	0.0110141	7.62021e-05		4.0825e-08	-0.879353	-0.304341	-1.44269	-1.00442	-0.209443
4.085e-08	0.0921228	0.0835735	0.0176156	0.0162645	0.0112039	0		4.085e-08	-0.265247	-0.283779	0.105934	1.13746	-0.0686793
4.0875e-08	0.0905207	0.086867	0.0176156	0.0148347	0.0112039	7.62021e-05		4.0875e-08	-0.559683	0.293118	0.128352	2.27099	-0.0574297
4.09e-08	0.0958611	0.0860436	0.0174746	0.0135836	0.0110141	7.62021e-05		4.09e-08	0.537255	0.17492	0.0607396	-0.950754	-0.175976
4.0925e-08	0.0913218	0.0942775	0.0156426	0.0144772	0.0127231	0		4.0925e-08	-0.346342	1.58865	-1.0887	0.182898	1.00423
4.095e-08	0.0846462	0.0893372	0.014938	0.0148347	0.0132928	7.62021e-05		4.095e-08	-1.66009	0.774258	-1.51865	-1.32105	1.40622
4.0975e-08	0.0867824	0.0881021	0.0166291	0.0142985	0.0132928	0		4.0975e-08	-1.20542	0.586342	-0.41409	1.03386	1.41854
4.1e-08	0.0899866	0.086867	0.0143743	0.0153709	0.0112039	0		4.1e-08	-0.535395	0.398114	-1.83887	-0.26878	-0.00111552
4.1025e-08	0.094259	0.0872787	0.0201522	0.0146559	0.00987467	7.62021e-05		4.1025e-08	0.350424	0.48894	1.89197	-1.37033	-0.901776
4.105e-08	0.102003	0.0806916	0.0169109	0.0128686	0.0100646	7.62021e-05		4.105e-08	1.93635	-0.608337	-0.167646	0.583455	-0.760819
4.1075e-08	0.0899866	0.0872787	0.0188839	0.0159071	0.0125332	7.62021e-05		4.1075e-08	-0.456709	0.530972	1.12379	2.03083	0.945912
4.11e-08	0.103872	0.0831618	0.0140924	0.0135836	0.0119635	0		4.11e-08	2.3691	-0.14796	-1.93932	0.519717	0.566139
4.1125e-08	0.0849132	0.0835735	0.0146561	0.013941	0.0117736	7.62021e-05		4.1125e-08	-1.42795	-0.0574003	-1.55579	0.641005	0.447104
4.115e-08	0.0859813	0.0864553	0.0152198	0.0164433	0.0113938	0		4.115e-08	-1.1868	0.453846	-1.17152	-0.0559372	0.19713
4.1175e-08	0.0953271	0.070811	0.0170519	0.0132261	0.0102545	0		4.1175e-08	0.727257	-2.19077	0.0328946	0.269783	-0.576616
4.12e-08	0.0969292	0.0819267	0.0171928	0.0146559	0.0112039	0		4.12e-08	1.07824	-0.276419	0.146053	-0.428885	0.0888818
4.1225e-08	0.0886515	0.0827501	0.0169109	0.0142985	0.0125332	0		4.1225e-08	-0.569457	-0.115526	-0.0142983	-0.923721	1.01743
4.125e-08	0.0841121	0.0831618	0.018602	0.011975	0.0102545	0		4.125e-08	-1.46258	-0.0247376	1.10342	-0.0845263	-0.544278
4.1275e-08	0.100935	0.0852203	0.0171928	0.0134048	0.0100646	7.62021e-05		4.1275e-08	1.97165	0.347534	0.212274	-0.477286	-0.664736
4.13e-08	0.0886515	0.0839852	0.0173337	0.0134048	0.0102545	0.000152404		4.13e-08	-0.491316	0.1571	0.325787	-0.665074	-0.522737
4.1325e-08	0.0867824	0.0819267	0.0173337	0.0144772	0.0117736	0		4.1325e-08	-0.844603	-0.174549	0.347875	-0.44133	0.539419
4.135e-08	0.10494	0.0893372	0.0150789	0.0135836	0.0134827	0.000152404		4.135e-08	2.8684	1.11483	-1.09698	-0.732626	1.73463
4.1375e-08	0.0910547	0.0835735	0.0159245	0.0128686	0.00873528	0		4.1375e-08	0.0750904	0.148371	-0.525695	-0.199062	-1.54341
4.14e-08	0.0934579	0.0732812	0.0162063	0.0128686	0.0100646	0		4.14e-08	0.590184	-1.59614	-0.320767	-1.11042	-0.611434
4.1425e-08	0.0849132	0.0856319	0.0159245	0.0132261	0.00968477	7.62021e-05		4.1425e-08	-1.12198	0.542807	-0.483289	1.07777	-0.864391
4.145e-08	0.0921228	0.0905723	0.0164882	0.0142985	0.0100646	0		4.145e-08	0.371785	1.41213	-0.0938741	0.372803	-0.590103
4.1475e-08	0.0814419	0.0811033	0.0143743	0.0125112	0.0108242	0		4.1475e-08	-1.77839	-0.193811	-1.45442	0.598619	-0.0514183
4.15e-08	0.101469	0.0732812	0.0157835	0.013941	0.0106343	0		4.15e-08	2.33094	-1.51888	-0.511921	0.0991232	-0.172458
4.1525e-08	0.093725	0.0716344	0.0150789	0.0132261	0.0115837	0		4.1525e-08	0.778449	-1.78302	-0.952494	-0.297607	0.499481
4.155e-08	0.0838451	0.0741046	0.0153608	0.0121537	0.00987467	7.62021e-05		4.155e-08	-1.2126	-1.33848	-0.747093	-0.27968	-0.679725
4.1575e-08	0.0934579	0.0773981	0.0143743	0.0125112	0.00873528	0.000228606		4.1575e-08	0.777387	-0.751417	-1.37392	-0.157809	-1.46351
4.16e-08	0.0947931	0.0852203	0.0159245	0.0162645	0.0110141	0		4.16e-08	1.07716	0.617608	-0.335227	0.0683089	0.136298
4.1625e-08	0.0870494	0.0811033	0.0157835	0.0125112	0.00835549	0		4.1625e-08	-0.480852	-0.0722662	-0.406814	1.44059	-1.70874
4.165e-08	0.0846462	0.0811033	0.0138106	0.0121537	0.00949487	0		4.165e-08	-0.947286	-0.0520018	-1.68477	0.730243	-0.902887
4.1675e-08	0.0987984	0.0765747	0.0153608	0.0148347	0.0123433	0		4.1675e-08	1.97888	-0.814556	-0.643372	2.21005	1.09914
4.17e-08	0.0875834	0.0769864	0.0166291	0.0150134	0.00854539	0		4.17e-08	-0.293902	-0.723617	0.214124	0.350017	-1.54653
4.1725e-08	0.0849132	0.0786332	0.0140924	0.0128686	0.0108242	0		4.1725e-08	-0.816085	-0.418766	-1.43939	0.786655	0.0590125
4.175e-08	0.0902537	0.0675175	0.0171928	0.0101877	0.0108242	7.62021e-05		4.175e-08	0.30638	-2.32446	0.629902	1.11942	0.0700637
4.1775e-08	0.0846462	0.0703993	0.0164882	0.0160858	0.0075959	0		4.1775e-08	-0.819976	-1.80629	0.185573	-0.537546	-2.18272
4.18e-08	0.0910547	0.0885138	0.0157835	0.0155496	0.0134827	0		4.18e-08	0.523688	1.35527	-0.259707	1.99636	1.95784
4.1825e-08	0.0790387	0.0782215	0.0156426	0.00983021	0.0104444	0		4.1825e-08	-1.9234	-0.410445	-0.332202	-0.187771	-0.163547
4.185e-08	0.0846462	0.086867	0.0191657	0.0157283	0.0108242	0		4.185e-08	-0.743715	1.11151	2.02673	0.145112	0.1142
4.1875e-08	0.0891856	0.0835735	0.0162063	0.0130474	0.0110141	0		4.1875e-08	0.217451	0.559847	0.0839515	0.68888	0.258779
4.19e-08	0.0870494	0.0860436	0.0119786	0.0123324	0.0108242	0		4.19e-08	-0.197119	1.0102	-2.70608	-0.239809	0.136249
4.1925e-08	0.0811749	0.0773981	0.0135287	0.0109026	0.0134827	0		4.1925e-08	-1.38402	-0.474228	-1.6558	1.25268	2.0198
4.195e-08	0.0886515	0.0732812	0.0142334	0.0142985	0.0132928	7.62021e-05		4.195e-08	0.185467	-1.17175	-1.16684	0.322729	1.89836
4.1975e-08	0.0894526	0.0831618	0.0145152	0.0153709	0.00930498	0		4.1975e-08	0.37713	0.57041	-0.958916	1.29079	-0.902217
4.2e-08	0.0838451	0.0864553	0.0180383	0.0121537	0.0115837	0		4.2e-08	-0.756762	1.16565	1.41321	0.78162	0.716585
4.2025e-08	0.0843792	0.074928	0.0171928	0.0150134	0.0104444	7.62021e-05		4.2025e-08	-0.620875	-0.826327	0.870565	0.800151	-0.0768441
4.205e-08	0.081976	0.0798683	0.0138106	0.0123324	0.0117736	0		4.205e-08	-1.09337	0.0564389	-1.37003	1.87708	0.873678
4.2075e-08	0.0830441	0.069576	0.0159245	0.0132261	0.0123433	0		4.2075e-08	-0.846916	-1.72331	0.064932	-0.857922	1.28821
4.21e-08	0.0891856	0.0856319	0.014938	0.0121537	0.0110141	0		4.21e-08	0.45243	1.10524	-0.575282	0.113328	0.358947
4.2125e-08	0.0769025	0.0757513	0.0153608	0.0117962	0.0108242	0		4.2125e-08	-2.07166	-0.604274	-0.271333	0.131104	0.235525
4.215e-08	0.0918558	0.0757513	0.0129651	0.0130474	0.0108242	7.62021e-05		4.215e-08	1.05939	-0.584691	-1.8596	-0.807272	0.246544
4.2175e-08	0.0851802	0.0848086	0.0150789	0.0117962	0.0115837	7.62021e-05		4.2175e-08	-0.302046	1.02333	-0.419572	-0.577698	0.796495
4.22e-08	0.093992	0.0712227	0.01677	0.0148347	0.00911508	0		4.22e-08	1.55689	-1.34028	0.738786	0.39736	-0.944875
4.2225e-08	0.0817089	0.0790449	0.0155017	0.0135836	0.0100646	0		4.2225e-08	-0.973737	0.0525593	-0.093942	0.30883	-0.260082
4.225e-08	0.0833111	0.070811	0.0159245	0.013941	0.00911508	0		4.225e-08	-0.614898	-1.37459	0.211785	-1.80605	-0.924578
4.2275e-08	0.0905207	0.0724578	0.0163472	0.0137623	0.00854539	0		4.2275e-08	0.913615	-1.06599	0.51804	-0.295825	-1.31981
4.23e-08	0.08251	0.0679292	0.0184611	0.0125112	0.00968477	0.000152404		4.23e-08	-0.731587	-1.84393	1.96724	0.789819	-0.498626
4.2325e-08	0.0846462	0.0778098	0.0159245	0.0130474	0.0134827	0		4.2325e-08	-0.26045	-0.0850128	0.274515	0.059481	2.21827
4.235e-08	0.070761	0.0786332	0.0139515	0.0142985	0.0106343	0		4.235e-08	-3.13645	0.0799418	-1.04003	-0.886345	0.199325
4.2375e-08	0.08251	0.0889255	0.0178974	0.0132261	0.00949487	7.62021e-05		4.2375e-08	-0.656331	1.91536	1.65305	0.630218	-0.60289
4.24e-08	0.094259	0.0811033	0.0173337	0.011975	0.0138625	0		4.24e-08	1.8273	0.555848	1.29297	0.326528	2.52668
4.2425e-08	0.082243	0.0736929	0.014938	0.0135836	0.0108242	0		4.2425e-08	-0.662033	-0.732917	-0.311551	-0.621787	0.367785
4.245e-08	0.0843792	0.08028	0.0145152	0.0132261	0.00854539	0		4.245e-08	-0.189298	0.450848	-0.578569	0.147137	-1.251
4.2475e-08	0.0851802	0.0827501	0.0138106	0.0109026	0.0102545	0		4.2475e-08	0.00410507	0.908003	-1.03788	0.594851	-0.0179133
4.25e-08	0.0931909	0.0876904	0.0166291	0.0112601	0.0100646	0		4.25e-08	1.71071	1.80307	0.900664	1.47392	-0.143198
4.2525e-08	0.0817089	0.0806916	0.0135287	0.013941	0.00987467	0.000152404		4.2525e-08	-0.673835	0.584282	-1.19103	0.0920172	-0.268686
4.255e-08	0.0790387	0.0848086	0.0132469	0.0144772	0.0102545	0		4.255e-08	-1.21002	1.33435	-1.36408	1.51136	0.0142629
4.2575e-08	0.0801068	0.076163	0.0138106	0.0128686	0.0106343	0		4.2575e-08	-0.960834	-0.178778	-0.960099	0.126796	0.297602
4.26e-08	0.0934579	0.0720461	0.01677	0.0107239	0.00949487	0		4.26e-08	1.87368	-0.890097	1.08224	1.87285	-0.509976
4.2625e-08	0.0785047	0.0765747	0.0153608	0.0116175	0.0075959	7.62021e-05		4.2625e-08	-1.24881	-0.0664126	0.139392	1.45925	-1.8648
4.265e-08	0.0875834	0.070811	0.0160654	0.0132261	0.0108242	0		4.265e-08	0.689065	-1.07151	0.642455	-1.44476	0.466927
4.2675e-08	0.0865154	0.0687526	0.0139515	0.0135836	0.00683631	0		4.2675e-08	0.489673	-1.41881	-0.785789	0.196283	-2.39301
4.27e-08	0.0806409	0.0782215	0.0150789	0.016622	0.0121534	0		4.27e-08	-0.724445	0.285871	0.00741946	2.3826	1.44664
4.2725e-08	0.0878505	0.076163	0.0169109	0.00929401	0.00835549	7.62021e-05		4.2725e-08	0.82312	-0.0610003	1.28615	-0.528757	-1.27987
4.275e-08	0.0889186	0.0753396	0.0142334	0.0117962	0.00892518	0		4.275e-08	1.0748	-0.188182	-0.533411	0.0311677	-0.859113
4.2775e-08	0.0843792	0.0856319	0.0173337	0.011975	0.00930498	0		4.2775e-08	0.140758	1.6679	1.6201	0.483335	-0.574871
4.28e-08	0.0835781	0.0757513	0.0132469	0.013941	0.00816559	0		4.28e-08	-0.00342326	-0.0756441	-1.17372	1.04514	-1.38793
4.2825e-08	0.0814419	0.0724578	0.011274	0.0130474	0.0121534	0		4.2825e-08	-0.430651	-0.644643	-2.51531	0.191554	1.50521
4.285e-08	0.0782377	0.0687526	0.0188839	0.0116175	0.0100646	0		4.285e-08	-1.08492	-1.28811	2.7553	-0.118392	0.00538601
4.2875e-08	0.0785047	0.0811033	0.0145152	0.0130474	0.00816559	0		4.2875e-08	-1.00385	0.940786	-0.240484	1.20837	-1.35913
4.29e-08	0.0801068	0.0732812	0.0156426	0.0112601	0.00873528	0		4.29e-08	-0.639297	-0.439786	0.55909	0.898732	-0.936699
4.2925e-08	0.0913218	0.076163	0.0128241	0.011975	0.0123433	0		4.2925e-08	1.76768	0.0959447	-1.37156	1.24464	1.68973
4.295e-08	0.0907877	0.0831618	0.0143743	0.00983021	0.0102545	0		4.295e-08	1.68061	1.37078	-0.278609	0.934419	0.18561
4.2975e-08	0.0841121	0.0666941	0.0177565	0.0126899	0.00911508	0		4.2975e-08	0.286974	-1.56419	2.08723	1.50008	-0.63115
4.3e-08	0.0883845	0.0728695	0.0164882	0.0130474	0.00816559	0		4.3e-08	1.2218	-0.436661	1.2286	0.312144	-1.3111
4.3025e-08	0.08251	0.0724578	0.014938	0.0150134	0.0104444	0		4.3025e-08	-0.00360603	-0.491462	0.172336	0.329359	0.355868
4.305e-08	0.0793057	0.0811033	0.0155017	0.0148347	0.0112039	0.000152404		4.305e-08	-0.661593	1.08267	0.584546	0.346552	0.91953
4.3075e-08	0.0779706	0.0679292	0.0140924	0.0137623	0.00873528	0		4.3075e-08	-0.921825	-1.26833	-0.376396	0.0338199	-0.867368
4.31e-08	0.0795728	0.069576	0.0145152	0.0134048	0.00949487	0		4.31e-08	-0.555423	-0.953177	-0.062243	0.160746	-0.303819
4.3125e-08	0.0851802	0.0741046	0.0135287	0.0114388	0.0077858	0		4.3125e-08	0.667141	-0.118135	-0.730778	-1.14436	-1.54018
4.315e-08	0.0811749	0.0765747	0.0132469	0.0116175	0.00797569	0		4.315e-08	-0.163648	0.346787	-0.908528	1.18713	-1.39218
4.3175e-08	0.0835781	0.070811	0.0125423	0.0125112	0.00854539	7.62021e-05		4.3175e-08	0.375385	-0.673941	-1.3822	1.20502	-0.96654
4.32e-08	0.0787717	0.0753396	0.0132469	0.0105451	0.00930498	0		4.32e-08	-0.628341	0.163062	-0.870688	0.339098	-0.401467
4.3225e-08	0.082777	0.0724578	0.0128241	0.0101877	0.00854539	0		4.3225e-08	0.254329	-0.338362	-1.14791	1.24083	-0.946945
4.325e-08	0.0843792	0.0848086	0.0152198	0.0116175	0.0110141	7.62021e-05		4.325e-08	0.62298	1.91508	0.550411	-0.180146	0.870135
4.3275e-08	0.0865154	0.076163	0.0143743	0.0117962	0.00968477	0.000152404		4.3275e-08	1.10669	0.370695	-0.0228037	-0.274381	-0.0926154
4.33e-08	0.0897196	0.0782215	0.0160654	0.00983021	0.0115837	0		4.33e-08	1.82035	0.76322	1.18479	-0.147068	1.31002
4.3325e-08	0.0806409	0.0786332	0.0150789	0.011975	0.00949487	0		4.3325e-08	-0.104105	0.857726	0.511861	2.20024	-0.211162
4.335e-08	0.0814419	0.0876904	0.0156426	0.0114388	0.0100646	0		4.335e-08	0.0929115	2.52086	0.928691	-0.225156	0.217397
4.3375e-08	0.0763685	0.0728695	0.0125423	0.0110813	0.0131029	0		4.3375e-08	-0.973794	-0.148856	-1.23517	-0.0975679	2.46043
4.34e-08	0.082243	0.0765747	0.0157835	0.0100089	0.0110141	0		4.34e-08	0.31522	0.543523	1.06901	-1.30534	0.936712
4.3425e-08	0.0720961	0.069576	0.0145152	0.013941	0.00930498	0		4.3425e-08	-1.84606	-0.709295	0.19427	-0.175958	-0.30977
4.345e-08	0.0782377	0.0881021	0.0164882	0.0105451	0.00873528	0		4.345e-08	-0.498294	2.68031	1.60807	-0.0480365	-0.719079
4.3475e-08	0.0750334	0.0732812	0.0145152	0.0117962	0.0112039	0		4.3475e-08	-1.16524	0.00290897	0.233707	0.526521	1.10996
4.35e-08	0.070227	0.0786332	0.0155017	0.0130474	0.0102545	0		4.35e-08	-2.17914	0.997363	0.951792	1.54894	0.420992
4.3525e-08	0.0801068	0.0634006	0.0139515	0.0101877	0.00892518	7.62021e-05		4.3525e-08	-0.021031	-1.76027	-0.126412	0.672379	-0.549279
4.355e-08	0.0777036	0.0650473	0.0121195	0.0121537	0.0075959	7.62021e-05		4.355e-08	-0.51599	-1.44184	-1.4067	-0.205854	-1.52099
4.3575e-08	0.0790387	0.0658707	0.0147971	0.0116175	0.0104444	7.62021e-05		4.3575e-08	-0.20275	-1.27335	0.512435	0.482508	0.593408
4.36e-08	0.0899866	0.074928	0.0133878	0.013941	0.00968477	7.62021e-05		4.36e-08	2.19254	0.399996	-0.469327	0.723609	0.0424108
4.3625e-08	0.0769025	0.0638123	0.0156426	0.0117962	0.0100646	0.000304808		4.3625e-08	-0.616605	-1.61329	1.15359	0.291771	0.333876
4.365e-08	0.0833111	0.0773981	0.0155017	0.0114388	0.00930498	0		4.365e-08	0.797356	0.890938	1.07366	-1.60115	-0.21814
4.3675e-08	0.0790387	0.0798683	0.0140924	0.0116175	0.00892518	0		4.3675e-08	-0.10458	1.3631	0.0895097	-1.02409	-0.489466
4.37e-08	0.0763685	0.0741046	0.0147971	0.013941	0.00683631	0		4.37e-08	-0.659892	0.326942	0.611608	0.116697	-2.02888
4.3725e-08	0.0801068	0.0671058	0.0124014	0.0130474	0.00892518	0		4.3725e-08	0.176701	-0.937253	-1.07948	-1.78169	-0.469509
4.375e-08	0.0790387	0.0691643	0.0146561	0.0101877	0.00835549	0		4.375e-08	-0.030843	-0.541028	0.550539	0.826091	-0.882704
4.3775e-08	0.0835781	0.0720461	0.0126832	0.0103664	0.00968477	0		4.3775e-08	0.981643	0.00695387	-0.841495	0.504621	0.11509
4.38e-08	0.0814419	0.0699876	0.0145152	0.0121537	0.00892518	0		4.38e-08	0.541654	-0.352321	0.488973	-0.946992	-0.439586
4.3825e-08	0.0755674	0.0728695	0.0133878	0.011975	0.00949487	0		4.3825e-08	-0.713757	0.196513	-0.299726	0.764179	-0.00552764
4.385e-08	0.082243	0.069576	0.0129651	0.00965147	0.0104444	0		4.385e-08	0.76617	-0.390535	-0.584335	-0.916265	0.712079
4.3875e-08	0.0656876	0.0839852	0.0139515	0.00983021	0.0075959	0		4.3875e-08	-2.82211	2.28228	0.14275	-0.221344	-1.40072
4.39e-08	0.0777036	0.0634006	0.0142334	0.013941	0.00797569	0		4.39e-08	-0.175213	-1.49134	0.36459	0.0213684	-1.10813
4.3925e-08	0.0838451	0.0745163	0.0132469	0.0109026	0.0108242	0		4.3925e-08	1.19147	0.576983	-0.32597	-0.0758996	1.02797
4.395e-08	0.0696929	0.0662824	0.0128241	0.0103664	0.0077858	0.000228606		4.395e-08	-1.87862	-0.923499	-0.611812	-0.514085	-1.23111
4.3975e-08	0.0817089	0.0691643	0.0116967	0.0103664	0.00816559	0		4.3975e-08	0.774562	-0.372822	-1.40634	-1.40781	-0.937795
4.4e-08	0.0699599	0.0786332	0.0145152	0.00983021	0.00835549	7.62021e-05		4.4e-08	-1.7739	1.39629	0.645601	0.427547	-0.78615
4.4025e-08	0.0678238	0.0703993	0.0140924	0.0116175	0.00816559	0		4.4025e-08	-2.219	-0.106954	0.359698	-0.694811	-0.918684
4.405e-08	0.071028	0.0782215	0.0129651	0.0101877	0.00664641	0		4.405e-08	-1.49335	1.35996	-0.436379	-0.907355	-2.04748
4.4075e-08	0.0771696	0.0769864	0.0133878	0.0112601	0.00911508	0		4.4075e-08	-0.121984	1.15103	-0.111922	0.819272	-0.187619
4.41e-08	0.0766355	0.0843969	0.0124014	0.0128686	0.0110141	0		4.41e-08	-0.215062	2.54458	-0.807964	-0.53435	1.24743
4.4125e-08	0.0715621	0.0662824	0.0133878	0.0126899	0.0125332	0		4.4125e-08	-1.30614	-0.795408	-0.0744813	-1.43327	2.39933
4.415e-08	0.071028	0.0798683	0.0146561	0.0100089	0.0100646	0		4.415e-08	-1.40025	1.74523	0.865	1.21279	0.556062
4.4175e-08	0.0809079	0.076163	0.0128241	0.0109026	0.00835549	0		4.4175e-08	0.797917	1.07696	-0.446607	0.886344	-0.718656
4.42e-08	0.0739653	0.0671058	0.0153608	0.0103664	0.0104444	0		4.42e-08	-0.706596	-0.587389	1.41679	0.444666	0.863044
4.4225e-08	0.0758344	0.0757513	0.0115558	0.0153709	0.00683631	0		4.4225e-08	-0.270766	1.03964	-1.3333	0.34632	-1.8435
4.425e-08	0.0817089	0.0757513	0.0118377	0.0107239	0.0108242	0		4.425e-08	1.04924	1.05923	-1.11046	2.19982	1.17087
4.4275e-08	0.0728972	0.0773981	0.0115558	0.0101877	0.00835549	0		4.4275e-08	-0.871077	1.38564	-1.29844	2.21774	-0.680063
4.43e-08	0.0753004	0.0679292	0.0135287	0.0112601	0.00797569	0		4.43e-08	-0.31659	-0.360207	0.159498	1.08527	-0.957084
4.4325e-08	0.0753004	0.0712227	0.0105693	0.00911528	0.0102545	0		4.4325e-08	-0.292652	0.272861	-1.98463	-1.31587	0.773541
4.435e-08	0.0851802	0.0679292	0.0126832	0.0116175	0.0072161	0		4.435e-08	1.91704	-0.323212	-0.42155	-0.725018	-1.51239
4.4375e-08	0.0742323	0.064224	0.013106	0.0130474	0.0075959	0		4.4375e-08	-0.481248	-0.997096	-0.0938043	0.674345	-1.21611
4.44e-08	0.0753004	0.0699876	0.0159245	0.0114388	0.00968477	0		4.44e-08	-0.220831	0.0987436	1.99049	-1.8493	0.374301
4.4425e-08	0.0801068	0.0732812	0.0136697	0.0110813	0.007406	7.62021e-05		4.4425e-08	0.868753	0.733892	0.356726	-1.14182	-1.34154
4.445e-08	0.0742323	0.0753396	0.011274	0.0100089	0.00987467	7.62021e-05		4.445e-08	-0.409861	1.13864	-1.3837	-0.664407	0.538983
4.4475e-08	0.071028	0.069576	0.0119786	0.00929401	0.00835549	7.62021e-05		4.4475e-08	-1.09747	0.0780203	-0.848557	0.0453991	-0.603012
4.45e-08	0.0720961	0.0794566	0.0132469	0.0123324	0.0102545	0		4.45e-08	-0.836858	1.94981	0.102306	0.524708	0.848264
4.4525e-08	0.0809079	0.0675175	0.0115558	0.0107239	0.007406	0		4.4525e-08	1.14582	-0.270824	-1.1246	1.12083	-1.30508
4.455e-08	0.08251	0.0687526	0.0140924	0.0117962	0.0104444	0		4.455e-08	1.52713	-0.0204153	0.762673	0.0927227	1.01399
4.4575e-08	0.0766355	0.0699876	0.0115558	0.0137623	0.00664641	0		4.4575e-08	0.2442	0.23032	-1.08997	-0.472518	-1.86479
4.46e-08	0.0790387	0.0638123	0.0125423	0.0109026	0.0110141	0		4.46e-08	0.803819	-0.912397	-0.344067	0.589389	1.46928
4.4625e-08	0.0688919	0.0650473	0.0159245	0.0109026	0.0102545	0		4.4625e-08	-1.43417	-0.66199	2.17435	1.30398	0.901609
4.465e-08	0.0742323	0.0671058	0.0146561	0.0103664	0.00987467	0		4.465e-08	-0.219596	-0.25615	1.25621	2.48589	0.62269
4.4675e-08	0.0731642	0.0613421	0.011133	0.00947274	0.0077858	7.62021e-05		4.4675e-08	-0.434304	-1.32414	-1.33384	0.287998	-0.960712
4.47e-08	0.070227	0.060107	0.0119786	0.0121537	0.0104444	0		4.47e-08	-1.06701	-1.53947	-0.689898	-1.09684	1.07862
4.4725e-08	0.0793057	0.076163	0.0122604	0.0105451	0.00854539	0		4.4725e-08	0.986305	1.50877	-0.463102	-0.848593	-0.361659
4.475e-08	0.0747664	0.0716344	0.0140924	0.0103664	0.0119635	0		4.475e-08	-0.0048751	0.672962	0.91558	1.15412	2.2619
4.4775e-08	0.0806409	0.064224	0.0125423	0.0112601	0.00816559	0		4.4775e-08	1.3345	-0.708862	-0.217949	-0.584945	-0.632828
4.48e-08	0.0758344	0.0741046	0.0132469	0.0112601	0.00797569	0		4.48e-08	0.282212	1.17826	0.324419	-0.218533	-0.768739
4.4825e-08	0.0809079	0.065459	0.0118377	0.0123324	0.0075959	0		4.4825e-08	1.44396	-0.439075	-0.706958	0.265753	-1.0504
4.485e-08	0.0793057	0.0646357	0.0118377	0.00822163	0.00854539	0		4.485e-08	1.10924	-0.576907	-0.689515	1.22032	-0.313043
4.4875e-08	0.0715621	0.0650473	0.0143743	0.0109026	0.00797569	0		4.4875e-08	-0.605199	-0.480811	1.22121	0.179643	-0.74055
4.49e-08	0.0712951	0.0699876	0.0122604	0.0105451	0.00797569	0		4.49e-08	-0.641863	0.474562	-0.338762	-0.745374	-0.731154
4.4925e-08	0.0699599	0.0564018	0.0159245	0.00929401	0.0102545	0		4.4925e-08	-0.918804	-2.08596	2.41895	-0.0245556	1.02965
4.495e-08	0.0688919	0.0617538	0.0114149	0.0125112	0.00949487	0		4.495e-08	-1.13607	-1.05218	-0.936109	-0.715897	0.456098
4.4975e-08	0.0672897	0.0724578	0.0128241	0.0123324	0.00816559	0		4.4975e-08	-1.47394	1.00063	0.13689	-1.52641	-0.556778
4.5e-08	0.0656876	0.0662824	0.0147971	0.0114388	0.00797569	7.62021e-05		4.5e-08	-1.81234	-0.155187	1.63461	-0.568413	-0.69353
4.5025e-08	0.0779706	0.0646357	0.0118377	0.0110813	0.0072161	0		4.5025e-08	0.980351	-0.450455	-0.567329	0.863711	-1.26962
4.505e-08	0.0659546	0.0555784	0.0140924	0.0110813	0.00854539	0		4.505e-08	-1.70726	-2.15817	1.14422	1.7073	-0.23529
4.5075e-08	0.082777	0.0650473	0.0107103	0.0114388	0.00873528	7.62021e-05		4.5075e-08	2.11465	-0.335876	-1.38043	-0.287345	-0.0789971
4.51e-08	0.0680908	0.0728695	0.0114149	0.0080429	0.00968477	0		4.51e-08	-1.17959	1.17479	-0.833426	-0.627637	0.664271
4.5125e-08	0.0744993	0.0699876	0.0119786	0.00929401	0.00816559	0		4.5125e-08	0.292659	0.643671	-0.391597	-0.731502	-0.499774
4.515e-08	0.0696929	0.069576	0.0108512	0.0110813	0.00949487	0		4.515e-08	-0.771417	0.58379	-1.22439	-0.598291	0.538047
4.5175e-08	0.0646195	0.0605187	0.0125423	0.0132261	0.00949487	0		4.5175e-08	-1.89751	-1.12945	0.0689648	-1.29611	0.548287
4.52e-08	0.0798398	0.0592837	0.0118377	0.00965147	0.00949487	0		4.52e-08	1.57464	-1.34829	-0.44556	-0.80663	0.558534
4.5225e-08	0.0750334	0.0629889	0.0124014	0.0100089	0.00835549	0		4.5225e-08	0.509129	-0.621397	-0.00179373	-0.554221	-0.314555
4.525e-08	0.0694259	0.0625772	0.0122604	0.0107239	0.0077858	0		4.525e-08	-0.739772	-0.682457	-0.0906956	-1.37304	-0.746934
4.5275e-08	0.0694259	0.0691643	0.0129651	0.0107239	0.00987467	0		4.5275e-08	-0.716764	0.598568	0.460928	-0.0481447	0.88416
4.53e-08	0.0720961	0.0576369	0.0133878	0.00768543	0.00892518	0		4.53e-08	-0.0867978	-1.59506	0.799752	1.99481	0.156895
4.5325e-08	0.0774366	0.065459	0.011133	0.00822163	0.00854539	7.62021e-05		4.5325e-08	1.15143	-0.0757184	-0.893724	-0.0180012	-0.128492
4.535e-08	0.0731642	0.0592837	0.0107103	0.0100089	0.00645651	0		4.535e-08	0.203155	-1.24444	-1.1982	2.02858	-1.74412
4.5375e-08	0.0811749	0.0638123	0.0121195	0.0110813	0.00968477	7.62021e-05		4.5375e-08	2.05156	-0.356147	-0.109711	0.0121042	0.77808
4.54e-08	0.0659546	0.0621655	0.0105693	0.00983021	0.00835549	7.62021e-05		4.54e-08	-1.39318	-0.655166	-1.27245	2.06235	-0.247377
4.5425e-08	0.0731642	0.064224	0.0119786	0.0123324	0.00835549	7.62021e-05		4.5425e-08	0.273944	-0.240972	-0.182016	-1.0362	-0.237783
4.545e-08	0.0638184	0.0634006	0.0126832	0.0110813	0.00702621	0		4.545e-08	-1.83595	-0.381666	0.372949	2.33603	-1.26548
4.5475e-08	0.070761	0.0683409	0.0108512	0.0107239	0.00702621	0		4.5475e-08	-0.22781	0.589149	-1.00794	-1.72823	-1.25663
4.55e-08	0.0718291	0.0609304	0.0115558	0.011975	0.00892518	0.000228606		4.55e-08	0.0396031	-0.822684	-0.452798	0.207601	0.236224
4.5525e-08	0.0750334	0.0736929	0.0119786	0.00929401	0.00911508	0		4.5525e-08	0.796056	1.6601	-0.112281	-1.34058	0.394653
4.555e-08	0.0728972	0.0638123	0.00944194	0.0103664	0.00892518	0		4.555e-08	0.330901	-0.230562	-2.03725	-0.00282422	0.25606
4.5575e-08	0.0664887	0.0646357	0.0128241	0.00929401	0.00968477	0		4.5575e-08	-1.11377	-0.053371	0.570526	0.373506	0.860854
4.56e-08	0.070761	0.0732812	0.0101466	0.0110813	0.00911508	0		4.56e-08	-0.111779	1.63828	-1.46562	-0.334759	0.424699
4.5625e-08	0.0769025	0.0605187	0.0124014	0.0100089	0.00873528	0.000304808		4.5625e-08	1.32045	-0.814845	0.281842	-0.802944	0.136835
4.565e-08	0.0769025	0.0650473	0.011133	0.0117962	0.00816559	0		4.565e-08	1.34466	0.0805466	-0.675311	1.86876	-0.300501
4.5675e-08	0.0678238	0.0625772	0.0114149	0.00857909	0.00911508	0		4.5675e-08	-0.717023	-0.380551	-0.441694	-0.653739	0.454738
4.57e-08	0.071028	0.0551667	0.0105693	0.0109026	0.00835549	0		4.57e-08	0.042451	-1.80144	-1.07583	-0.397439	-0.132279
4.5725e-08	0.0734312	0.0613421	0.0138106	0.0080429	0.0072161	0		4.5725e-08	0.618669	-0.584947	1.43887	-1.10969	-1.01889
4.575e-08	0.0624833	0.0605187	0.0116967	0.0105451	0.00968477	7.62021e-05		4.575e-08	-1.8784	-0.727435	-0.173308	-1.82326	0.933247
4.5775e-08	0.0758344	0.0634006	0.0102875	0.0110813	0.00892518	0		4.5775e-08	1.21972	-0.149274	-1.24444	0.495391	0.345259
4.58e-08	0.0667557	0.0806916	0.00944194	0.00929401	0.007406	0.000228606		4.58e-08	-0.849598	3.23517	-1.88193	0.632049	-0.842371
4.5825e-08	0.070494	0.0629889	0.0143743	0.0109026	0.00664641	0		4.5825e-08	0.0355126	-0.193777	1.94967	1.13359	-1.43254
4.585e-08	0.0742323	0.0666941	0.00958286	0.0075067	0.00626662	0		4.585e-08	0.921848	0.546466	-1.74186	0.540972	-1.72375
4.5875e-08	0.070227	0.0703993	0.0128241	0.00965147	0.00835549	0		4.5875e-08	0.0200929	1.28776	0.78617	0.190823	-0.0651866
4.59e-08	0.0691589	0.0703993	0.0115558	0.0109026	0.00835549	0		4.59e-08	-0.203776	1.30661	-0.179944	-0.891287	-0.0556122
4.5925e-08	0.0654206	0.0609304	0.0129651	0.0121537	0.0106343	0		4.5925e-08	-1.04587	-0.524778	0.931513	0.708529	1.75677
4.595e-08	0.0651535	0.0646357	0.0145152	0.00732797	0.0075959	0		4.595e-08	-1.08536	0.217297	2.15458	-0.497195	-0.637816
4.5975e-08	0.0664887	0.064224	0.0128241	0.0109026	0.00911508	0		4.5975e-08	-0.753667	0.154798	0.857989	0.128096	0.574944
4.6e-08	0.0675567	0.0609304	0.0121195	0.00983021	0.0113938	0		4.6e-08	-0.48346	-0.472163	0.327165	-1.20269	2.39168
4.6025e-08	0.0635514	0.065459	0.013106	0.00857909	0.00626662	0		4.6025e-08	-1.39026	0.432812	1.11354	-2.04617	-1.66504
4.605e-08	0.070494	0.0650473	0.00972379	0.00983021	0.00797569	0		4.605e-08	0.243996	0.370222	-1.50735	-1.05308	-0.299661
4.6075e-08	0.0648865	0.0617538	0.0107103	0.0110813	0.00968477	0		4.6075e-08	-1.03599	-0.258048	-0.721312	0.0644008	1.06767
4.61e-08	0.0782377	0.0720461	0.0105693	0.0109026	0.0102545	0		4.61e-08	2.09111	1.78087	-0.815147	-0.166526	1.53098
4.6125e-08	0.0672897	0.0650473	0.00958286	0.0121537	0.00873528	0		4.6125e-08	-0.432293	0.424474	-1.57078	0.707937	0.332803
4.615e-08	0.0648865	0.0576369	0.0108512	0.0103664	0.00683631	7.62021e-05		4.615e-08	-0.969351	-1.01486	-0.561936	0.600103	-1.16954
4.6175e-08	0.070494	0.0576369	0.011274	0.0110813	0.00968477	7.62021e-05		4.6175e-08	0.359732	-0.997801	-0.214057	0.122791	1.10899
4.62e-08	0.0622163	0.0531083	0.0114149	0.0101877	0.00816559	0		4.62e-08	-1.54762	-1.87267	-0.086706	-0.35539	-0.0921175
4.6225e-08	0.0678238	0.0568135	0.0105693	0.0105451	0.00512723	0.000152404		4.6225e-08	-0.217095	-1.12595	-0.733922	1.75504	-2.50729
4.625e-08	0.0646195	0.0605187	0.0139515	0.00911528	0.00683631	7.62021e-05		4.625e-08	-0.942727	-0.378188	1.94113	-0.45046	-1.13472
4.6275e-08	0.070494	0.0568135	0.0124014	0.0109026	0.0075959	0		4.6275e-08	0.452453	-1.09208	0.740054	0.551821	-0.518981
4.63e-08	0.0686248	0.0675175	0.0105693	0.00857909	0.00930498	0		4.63e-08	0.0384325	1.03914	-0.685309	-0.916946	0.856974
4.6325e-08	0.070494	0.0596953	0.0121195	0.0100089	0.00816559	0.000152404		4.6325e-08	0.498743	-0.488605	0.552909	0.705368	-0.044786
4.635e-08	0.0656876	0.0646357	0.0118377	0.0110813	0.00797569	7.62021e-05		4.635e-08	-0.603879	0.50595	0.347818	1.46352	-0.187424
4.6375e-08	0.0672897	0.0646357	0.0142334	0.0109026	0.00816559	7.62021e-05		4.6375e-08	-0.206021	0.52398	2.25707	-1.99198	-0.0258862
4.64e-08	0.0670227	0.0699876	0.0105693	0.00965147	0.00911508	7.62021e-05		4.64e-08	-0.246037	1.60222	-0.620617	1.6189	0.745104
4.6425e-08	0.0651535	0.0584603	0.0102875	0.00893655	0.00664641	0		4.6425e-08	-0.662182	-0.664112	-0.827445	1.3863	-1.22632
4.645e-08	0.0630174	0.0605187	0.00972379	0.00911528	0.0100646	7.62021e-05		4.645e-08	-1.14166	-0.238578	-1.25792	1.27757	1.52776
4.6475e-08	0.070494	0.0555784	0.0107103	0.00875782	0.00702621	0		4.6475e-08	0.637704	-1.20186	-0.460316	-1.1952	-0.903875
4.65e-08	0.0683578	0.0621655	0.0114149	0.0110813	0.00531713	0.000152404		4.65e-08	0.158405	0.123516	0.115077	-0.808392	-2.2698
4.6525e-08	0.0699599	0.060107	0.0108512	0.00947274	0.00512723	0		4.6525e-08	0.558345	-0.268035	-0.315863	-0.545568	-2.41485
4.655e-08	0.0646195	0.0703993	0.00831454	0.00857909	0.00911508	0		4.655e-08	-0.676588	1.79701	-2.31611	-0.407064	0.805176
4.6575e-08	0.0696929	0.0625772	0.00873732	0.00929401	0.00664641	0		4.6575e-08	0.541511	0.258514	-1.96525	0.106209	-1.17485
4.66e-08	0.0763685	0.060107	0.0107103	0.00983021	0.0077858	0.000152404		4.66e-08	2.13925	-0.215905	-0.379129	0.370428	-0.247151
4.6625e-08	0.0640854	0.0679292	0.00887824	0.0103664	0.00968477	7.62021e-05		4.6625e-08	-0.736201	1.36106	-1.8234	1.01032	1.29506
4.665e-08	0.0662216	0.0564018	0.0125423	0.00840036	0.00892518	0		4.665e-08	-0.209494	-0.920417	1.11517	-0.476857	0.691753
4.6675e-08	0.0672897	0.0580486	0.011274	0.0075067	0.007406	0.000228606		4.6675e-08	0.0654494	-0.57474	0.119783	0.288675	-0.526516
4.67e-08	0.0643525	0.0605187	0.0102875	0.00911528	0.00968477	0		4.67e-08	-0.60677	-0.0640602	-0.652167	1.55719	1.32607
4.6725e-08	0.0672897	0.0596953	0.011133	0.00911528	0.00816559	0.000152404		4.6725e-08	0.110738	-0.211231	0.0403439	0.568561	0.106481
4.675e-08	0.0680908	0.0691643	0.00873732	0.00911528	0.0075959	0		4.675e-08	0.323157	1.70084	-1.8619	0.583202	-0.345617
4.6775e-08	0.0720961	0.0629889	0.0114149	0.00661305	0.0072161	7.62021e-05		4.6775e-08	1.29549	0.482953	0.299337	-0.408119	-0.644421
4.68e-08	0.0675567	0.0580486	0.00944194	0.00947274	0.0104444	0		4.68e-08	0.241968	-0.489233	-1.26707	0.738287	1.98374
4.6825e-08	0.0659546	0.058872	0.00930101	0.00893655	0.00930498	0		4.6825e-08	-0.115756	-0.307043	-1.36504	1.38282	1.0694
4.685e-08	0.0686248	0.0506381	0.0124014	0.0109026	0.00664641	0		4.685e-08	0.541011	-1.94219	1.14243	1.65022	-1.08065
4.6875e-08	0.070761	0.0584603	0.00958286	0.00768543	0.00854539	0		4.6875e-08	1.07171	-0.355327	-1.10802	1.16094	0.471978
4.69e-08	0.0640854	0.0526966	0.0105693	0.00607685	0.0077858	7.62021e-05		4.69e-08	-0.49334	-1.49648	-0.298189	0.418171	-0.136435
4.6925e-08	0.0627503	0.0580486	0.00958286	0.00929401	0.00949487	0		4.6925e-08	-0.789135	-0.403813	-1.07734	-0.705165	1.26446
4.695e-08	0.0675567	0.0506381	0.0125423	0.00786416	0.00702621	0		4.695e-08	0.377906	-1.8781	1.32592	1.20607	-0.736953
4.6975e-08	0.0691589	0.0568135	0.0139515	0.0107239	0.00664641	0		4.6975e-08	0.782594	-0.618339	2.48164	0.334671	-1.03787
4.7e-08	0.0616822	0.054755	0.00817362	0.00768543	0.00911508	0		4.7e-08	-0.978372	-1.01629	-2.17054	-0.284802	0.985229
4.7025e-08	0.0624833	0.0605187	0.0109921	0.00893655	0.00588682	0		4.7025e-08	-0.765428	0.162798	0.12424	0.109468	-1.64106
4.705e-08	0.0632844	0.0605187	0.0101466	0.00875782	0.00968477	0		4.705e-08	-0.552229	0.180233	-0.544221	1.90108	1.4708
4.7075e-08	0.0608812	0.0596953	0.0105693	0.0109026	0.00930498	0		4.7075e-08	-1.10494	0.0313542	-0.185819	-0.1167	1.17053
4.71e-08	0.0523364	0.0592837	0.00958286	0.0121537	0.0075959	0		4.71e-08	-3.12803	-0.0345504	-0.97022	-0.611723	-0.218067
4.7125e-08	0.0627503	0.0584603	0.0126832	0.0121537	0.00835549	0		4.7125e-08	-0.614363	-0.183842	1.56293	2.45698	0.413123
4.715e-08	0.0648865	0.05352	0.00930101	0.00893655	0.00835549	0		4.715e-08	-0.0806542	-1.1667	-1.16878	1.07136	0.422669
4.7175e-08	0.0630174	0.05352	0.0109921	0.00768543	0.0072161	0		4.7175e-08	-0.50665	-1.15026	0.222227	-0.444245	-0.502264
4.72e-08	0.0667557	0.0629889	0.00986471	0.00983021	0.00664641	0		4.72e-08	0.412315	0.785611	-0.679559	-0.175514	-0.960958
4.7225e-08	0.0622163	0.0543434	0.0108512	0.00822163	0.00702621	0		4.7225e-08	-0.655193	-0.950345	0.140053	1.88228	-0.640464
4.725e-08	0.0643525	0.0551667	0.00944194	0.00822163	0.00607672	7.62021e-05		4.725e-08	-0.120087	-0.766643	-0.993525	1.51414	-1.41211
4.7275e-08	0.0619493	0.0613421	0.0100056	0.0100089	0.00930498	0		4.7275e-08	-0.675879	0.504526	-0.518045	-3.07815	1.25144
4.73e-08	0.0630174	0.0605187	0.0119786	0.00929401	0.00683631	0		4.73e-08	-0.397151	0.354692	1.11019	-1.91425	-0.770464
4.7325e-08	0.0635514	0.0485797	0.00930101	0.0110813	0.00645651	0		4.7325e-08	-0.246677	-2.05675	-1.06347	0.405546	-1.07466
4.735e-08	0.0600801	0.0576369	0.0104284	0.00893655	0.00683631	0		4.735e-08	-1.06127	-0.197154	-0.125234	0.291281	-0.753179
4.7375e-08	0.0616822	0.0592837	0.00817362	0.00697051	0.00626662	0		4.7375e-08	-0.653539	0.155356	-1.95756	1.3327	-1.21448
4.74e-08	0.0566088	0.0576369	0.00887824	0.0105451	0.0072161	0		4.74e-08	-1.85628	-0.163121	-1.36531	-0.195015	-0.422381
4.7425e-08	0.0715621	0.0551667	0.0114149	0.0107239	0.00816559	0.000152404		4.7425e-08	1.77581	-0.65006	0.732421	0.333128	0.370848
4.745e-08	0.0678238	0.0650473	0.011274	0.00840036	0.00664641	0		4.745e-08	0.895711	1.38396	0.633215	-0.683091	-0.875589
4.7475e-08	0.0718291	0.0683409	0.0109921	0.00822163	0.00816559	7.62021e-05		4.7475e-08	1.88714	2.07502	0.417851	0.876606	0.389732
4.75e-08	0.0648865	0.0539317	0.00944194	0.00929401	0.00607672	0		4.75e-08	0.230297	-0.852566	-0.842363	2.43902	-1.33014
4.7525e-08	0.0654206	0.0551667	0.00916009	0.00947274	0.00531713	0		4.7525e-08	0.381852	-0.583379	-1.05959	0.00163116	-1.95124
4.755e-08	0.0761015	0.05352	0.0105693	0.00714924	0.00892518	0		4.755e-08	2.99285	-0.903926	0.117845	0.0152205	1.0478
4.7575e-08	0.0635514	0.058872	0.00803269	0.00857909	0.00949487	0		4.7575e-08	-0.026932	0.209133	-1.96082	1.06351	1.53033
4.76e-08	0.0678238	0.0646357	0.00859639	0.00857909	0.00968477	0		4.76e-08	1.03198	1.40819	-1.48096	0.042361	1.69821
4.7625e-08	0.0643525	0.0605187	0.0125423	0.00983021	0.00683631	7.62021e-05		4.7625e-08	0.211538	0.581427	1.79767	-0.851039	-0.658114
4.765e-08	0.0619493	0.0564018	0.0108512	0.0134048	0.00683631	0		4.765e-08	-0.35048	-0.246536	0.414852	-0.0601856	-0.649482
4.7675e-08	0.0627503	0.0559901	0.0102875	0.00947274	0.00702621	0		4.7675e-08	-0.133934	-0.314291	-0.036178	0.472452	-0.482844
4.77e-08	0.0600801	0.0477563	0.00972379	0.00857909	0.0072161	0		4.77e-08	-0.76203	-1.99075	-0.488063	-0.422973	-0.315973
4.7725e-08	0.0678238	0.0584603	0.00859639	0.00983021	0.00607672	0		4.7725e-08	1.14556	0.227638	-1.40885	-0.539862	-1.25649
4.775e-08	0.059279	0.0485797	0.00944194	0.00857909	0.00569692	0		4.775e-08	-0.914508	-1.79004	-0.691748	-1.4378	-1.56499
4.7775e-08	0.0691589	0.0592837	0.00887824	0.0075067	0.00797569	0		4.7775e-08	1.51668	0.43162	-1.14562	0.528143	0.344471
4.78e-08	0.059012	0.0617538	0.00775085	0.00822163	0.00607672	7.62021e-05		4.78e-08	-0.937233	0.958309	-2.06969	0.802761	-1.23194
4.7825e-08	0.0624833	0.0621655	0.00845547	0.00983021	0.00588682	0		4.7825e-08	-0.0681246	1.06089	-1.46879	1.2083	-1.38246
4.785e-08	0.0611482	0.0522849	0.0100056	0.0100089	0.00702621	0		4.785e-08	-0.372729	-0.962127	-0.161539	1.09215	-0.421601
4.7875e-08	0.0622163	0.0572252	0.0102875	0.00822163	0.0100646	0		4.7875e-08	-0.0899188	0.0751601	0.0891977	-0.984816	2.12976
4.79e-08	0.0656876	0.0572252	0.0100056	0.00929401	0.00949487	0		4.79e-08	0.781568	0.0921149	-0.13067	0.728341	1.66324
4.7925e-08	0.0598131	0.0559901	0.0109921	0.00768543	0.0072161	0		4.7925e-08	-0.635161	-0.146556	0.709867	0.480468	-0.236247
4.795e-08	0.0630174	0.0539317	0.00972379	0.00822163	0.00873528	0		4.795e-08	0.171686	-0.556133	-0.335721	0.101098	1.04667
4.7975e-08	0.0566088	0.0551667	0.00916009	0.00911528	0.00607672	7.62021e-05		4.7975e-08	-1.37855	-0.283645	-0.792833	2.21314	-1.17475
4.8e-08	0.0574099	0.0555784	0.00817362	0.00732797	0.00873528	0		4.8e-08	-1.16112	-0.181589	-1.60541	-0.659705	1.06623
4.8025e-08	0.0595461	0.0551667	0.0107103	0.00875782	0.00531713	0		4.8025e-08	-0.615423	-0.250339	0.538029	-0.778371	-1.79681
4.805e-08	0.0544726	0.0564018	0.00789177	0.00822163	0.00835549	7.62021e-05		4.805e-08	-1.84144	0.0228545	-1.81425	0.023267	0.766346
4.8075e-08	0.0600801	0.0518732	0.00901917	0.0101877	0.0075959	0		4.8075e-08	-0.44153	-0.901719	-0.852344	0.299779	0.136559
4.81e-08	0.071028	0.0605187	0.00958286	0.00732797	0.00531713	7.62021e-05		4.81e-08	2.27512	0.912904	-0.363221	1.76237	-1.77371
4.8125e-08	0.0627503	0.0526966	0.007469	0.00822163	0.0072161	0		4.8125e-08	0.25901	-0.698031	-2.12919	-0.3325	-0.165417
4.815e-08	0.0595461	0.0531083	0.0105693	0.00768543	0.00987467	0		4.815e-08	-0.509167	-0.595991	0.498804	1.65991	2.08587
4.8175e-08	0.0576769	0.0596953	0.00873732	0.00857909	0.007406	7.62021e-05		4.8175e-08	-0.949055	0.793589	-1.03174	1.80664	0.012563
4.82e-08	0.0624833	0.0609304	0.00944194	0.00875782	0.0075959	0		4.82e-08	0.258584	1.0686	-0.422005	0.896043	0.181936
4.8225e-08	0.0608812	0.0605187	0.00930101	0.0075067	0.00873528	0		4.8225e-08	-0.115453	1.00018	-0.526211	-0.0161639	1.15414
4.825e-08	0.0694259	0.0452861	0.0107103	0.0075067	0.0077858	7.62021e-05		4.825e-08	2.01874	-2.16483	0.68141	0.26185	0.360746
4.8275e-08	0.0622163	0.0526966	0.0104284	0.00643432	0.0077858	0		4.8275e-08	0.257911	-0.600329	0.458538	1.20302	0.369944
4.83e-08	0.0598131	0.0510498	0.00972379	0.00893655	0.0077858	0		4.83e-08	-0.315399	-0.928613	-0.123275	-1.96659	0.379136
4.8325e-08	0.0493992	0.0568135	0.00887824	0.00965147	0.0072161	0		4.8325e-08	-2.87443	0.294169	-0.82579	0.16916	-0.0946216
4.835e-08	0.0528705	0.0526966	0.00831454	0.00857909	0.00854539	7.62021e-05		4.835e-08	-1.99426	-0.551558	-1.29019	1.51126	1.04189
4.8375e-08	0.0547397	0.0568135	0.0122604	0.00875782	0.0077858	0.000152404		4.8375e-08	-1.5104	0.327922	2.07887	-0.868425	0.406685
4.84e-08	0.0566088	0.0564018	0.00732807	0.00768543	0.0072161	0		4.84e-08	-1.02588	0.258428	-2.10165	0.608185	-0.0681148
4.8425e-08	0.0683578	0.0559901	0.0105693	0.00857909	0.00873528	7.62021e-05		4.8425e-08	1.9143	0.188821	0.672569	-0.0444082	1.23227
4.845e-08	0.0638184	0.0559901	0.00901917	0.0100089	0.00626662	7.62021e-05		4.845e-08	0.808372	0.205606	-0.633288	-0.43145	-0.858224
4.8475e-08	0.0619493	0.05352	0.0101466	0.00947274	0.007406	0		4.8475e-08	0.365297	-0.297034	0.343376	0.248547	0.120098
4.85e-08	0.0651535	0.0580486	0.00944194	0.0103664	0.00854539	7.62021e-05		4.85e-08	1.18491	0.672334	-0.243027	1.19686	1.09981
4.8525e-08	0.0595461	0.058872	0.00916009	0.00929401	0.00683631	0		4.8525e-08	-0.190165	0.862801	-0.469109	-0.393483	-0.347695
4.855e-08	0.0632844	0.0506381	0.00901917	0.00768543	0.0072161	7.62021e-05		4.855e-08	0.763307	-0.855162	-0.575059	1.35873	-0.0150409
4.8575e-08	0.0547397	0.05352	0.0105693	0.0101877	0.00797569	0		4.8575e-08	-1.3471	-0.231484	0.76713	0.03355	0.642351
4.86e-08	0.059012	0.0596953	0.00859639	0.00822163	0.00873528	0		4.86e-08	-0.259806	1.08813	-0.908447	-0.0875427	1.30067
4.8625e-08	0.0622163	0.0625772	0.007469	0.00822163	0.007406	7.62021e-05		4.8625e-08	0.562091	1.71406	-1.86159	-0.343031	0.173822
4.865e-08	0.0619493	0.0592837	0.00859639	0.00714924	0.00664641	7.62021e-05		4.865e-08	0.517037	1.03576	-0.880056	0.206691	-0.467185
4.8675e-08	0.0675567	0.0551667	0.0100056	0.00911528	0.00569692	7.62021e-05		4.8675e-08	1.94204	0.182339	0.345516	0.354167	-1.27172
4.87e-08	0.0614152	0.0526966	0.00845547	0.00786416	0.00683631	0		4.87e-08	0.426686	-0.323798	-0.972881	0.636395	-0.287487
4.8725e-08	0.0627503	0.0502264	0.00972379	0.00679178	0.00645651	0		4.8725e-08	0.7829	-0.830687	0.133423	-0.427189	-0.604553
4.875e-08	0.0555407	0.0506381	0.00944194	0.00446828	0.00626662	7.62021e-05		4.875e-08	-1.00337	-0.727531	-0.0944416	-1.62739	-0.759132
4.8775e-08	0.058745	0.0510498	0.0104284	0.00929401	0.0072161	0		4.8775e-08	-0.178646	-0.624262	0.771423	0.541833	0.0644849
4.88e-08	0.0539386	0.0568135	0.00930101	0.00732797	0.00493733	0		4.88e-08	-1.36467	0.615107	-0.186492	0.150187	-1.88495
4.8825e-08	0.0656876	0.0576369	0.00873732	0.00714924	0.0075959	7.62021e-05		4.8825e-08	1.60842	0.806872	-0.65899	0.703491	0.408758
4.885e-08	0.0651535	0.0465212	0.00873732	0.00822163	0.00797569	7.62021e-05		4.885e-08	1.49644	-1.53887	-0.644744	0.176029	0.74466
4.8875e-08	0.0683578	0.05352	0.00662345	0.00947274	0.00835549	7.62021e-05		4.8875e-08	2.32515	-0.0348428	-2.46075	1.13624	1.08103
4.89e-08	0.0598131	0.0576369	0.0101466	0.00714924	0.0075959	0		4.89e-08	0.195847	0.857892	0.605043	0.6082	0.435931
4.8925e-08	0.0520694	0.0576369	0.00916009	0.00911528	0.00626662	0		4.8925e-08	-1.7346	0.874919	-0.23525	1.16373	-0.701424
4.895e-08	0.0582109	0.05352	0.00986471	0.00875782	0.0077858	0		4.895e-08	-0.165625	0.0143446	0.3911	-0.586348	0.617955
4.8975e-08	0.0624833	0.0456978	0.00831454	0.00911528	0.00664641	0.000152404		4.8975e-08	0.933777	-1.63791	-0.940807	-0.30252	-0.356908
4.9e-08	0.0606142	0.0498147	0.00831454	0.00714924	0.0072161	0		4.9e-08	0.483458	-0.743839	-0.926891	1.61274	0.143958
4.9025e-08	0.0686248	0.0543434	0.0104284	0.00822163	0.0072161	0		4.9025e-08	2.52972	0.239433	0.927225	0.810645	0.152793
4.905e-08	0.0579439	0.048168	0.00887824	0.00822163	0.007406	0		4.905e-08	-0.149072	-1.06427	-0.40795	0.960166	0.325983
4.9075e-08	0.0582109	0.0543434	0.00873732	0.00732797	0.0075959	0		4.9075e-08	-0.0605375	0.272428	-0.516542	-0.661551	0.499403
4.91e-08	0.0656876	0.0522849	0.0107103	0.00732797	0.00645651	0.000152404		4.91e-08	1.85431	-0.151778	1.21985	-0.64949	-0.479127
4.9125e-08	0.0560748	0.0568135	0.00718715	0.00929401	0.00588682	0		4.9125e-08	-0.560044	0.834643	-1.84251	-1.18343	-0.964926
4.915e-08	0.0579439	0.0502264	0.0102875	0.00911528	0.00683631	0.000152404		4.915e-08	-0.0652879	-0.560735	0.88166	0.877432	-0.132767
4.9175e-08	0.058478	0.0465212	0.0069053	0.00822163	0.00816559	0		4.9175e-08	0.091245	-1.33982	-2.06322	-1.29698	1.03048
4.92e-08	0.0515354	0.0518732	0.00901917	0.00840036	0.00797569	0		4.92e-08	-1.65128	-0.175379	-0.198571	-0.601226	0.874828
4.9225e-08	0.0595461	0.049403	0.00718715	0.00661305	0.00512723	0		4.9225e-08	0.404921	-0.689975	-1.79054	-1.00006	-1.59367
4.925e-08	0.0638184	0.0473446	0.0109921	0.0100089	0.00607672	0.000228606		4.925e-08	1.51303	-1.11682	1.56183	0.656733	-0.759615
4.9275e-08	0.0520694	0.049403	0.00986471	0.00911528	0.00645651	0		4.9275e-08	-1.45587	-0.65847	0.58745	1.08148	-0.420647
4.93e-08	0.0550067	0.0485797	0.00930101	0.00822163	0.0072161	0		4.93e-08	-0.687715	-0.82003	0.106887	-0.690301	0.249873
4.9325e-08	0.0574099	0.0477563	0.00916009	0.00875782	0.007406	7.62021e-05		4.9325e-08	-0.054654	-0.981851	-0.00253035	0.696049	0.424351
4.935e-08	0.0542056	0.0564018	0.00930101	0.00768543	0.00569692	0		4.935e-08	-0.851263	0.897912	0.136081	0.296447	-1.05873
4.9375e-08	0.0560748	0.0522849	0.0069053	0.00768543	0.00873528	7.62021e-05		4.9375e-08	-0.353815	0.0263364	-1.96137	2.09901	1.6035
4.94e-08	0.0542056	0.0568135	0.00803269	0.00732797	0.00550703	7.62021e-05		4.94e-08	-0.810728	1.02046	-0.953858	-1.46947	-1.20902
4.9425e-08	0.0651535	0.0489914	0.00930101	0.00893655	0.00550703	0		4.9425e-08	2.00848	-0.653009	0.179913	0.196731	-1.20127
4.945e-08	0.0627503	0.0543434	0.00859639	0.00643432	0.00512723	7.62021e-05		4.945e-08	1.41593	0.520093	-0.428332	-1.03296	-1.52602
4.9475e-08	0.059279	0.0514615	0.00789177	0.00607685	0.0075959	0		4.9475e-08	0.549067	-0.0870438	-1.03771	1.05092	0.64435
4.95e-08	0.0555407	0.0514615	0.0105693	0.0080429	0.00702621	0		4.95e-08	-0.387484	-0.0709705	1.34694	-2.39256	0.153941
4.9525e-08	0.058478	0.0485797	0.0101466	0.00571939	0.00645651	7.62021e-05		4.9525e-08	0.386115	-0.679472	0.987802	-0.998287	-0.337188
4.955e-08	0.0595461	0.0518732	0.00803269	0.00714924	0.00664641	0		4.955e-08	0.681202	0.0504292	-0.872297	0.398341	-0.162115
4.9575e-08	0.0515354	0.0448744	0.00887824	0.00732797	0.00588682	0		4.9575e-08	-1.35432	-1.45244	-0.107945	-0.559355	-0.82106
4.96e-08	0.0656876	0.0502264	0.00718715	0.00822163	0.00569692	0		4.96e-08	2.30163	-0.275015	-1.59669	0.146246	-0.980055
4.9625e-08	0.0510013	0.049403	0.0100056	0.00875782	0.00664641	7.62021e-05		4.9625e-08	-1.4521	-0.438117	0.923363	-0.952224	-0.136759
4.965e-08	0.0531375	0.0498147	0.00789177	0.00679178	0.00398785	0		4.965e-08	-0.882779	-0.332835	-0.943575	0.171164	-2.46922
4.9675e-08	0.0566088	0.048168	0.00930101	0.00732797	0.0077858	0		4.9675e-08	0.0311024	-0.675456	0.325714	-0.372783	0.884114
4.97e-08	0.0552737	0.0452861	0.00930101	0.00714924	0.00512723	7.62021e-05		4.97e-08	-0.292179	-1.2876	0.340296	-0.63923	-1.45096
4.9725e-08	0.0555407	0.0436394	0.00873732	0.00786416	0.00569692	0		4.9725e-08	-0.202836	-1.63144	-0.148365	0.0692452	-0.940758
4.975e-08	0.0630174	0.0485797	0.00873732	0.00732797	0.00531713	0		4.975e-08	1.74692	-0.538974	-0.134257	0.499985	-1.26827
4.9775e-08	0.0563418	0.0498147	0.0100056	0.00911528	0.00607672	0		4.9775e-08	0.0450729	-0.253767	1.01414	1.35017	-0.589417
4.98e-08	0.0528705	0.0555784	0.00944194	0.00893655	0.0072161	7.62021e-05		4.98e-08	-0.831256	1.02106	0.524639	-2.54805	0.426239
4.9825e-08	0.0616822	0.0551667	0.0116967	0.0105451	0.007406	0		4.9825e-08	1.46733	0.94775	2.55943	-0.720341	0.603094
4.985e-08	0.0568758	0.0531083	0.00944194	0.0080429	0.00474744	0		4.985e-08	0.245205	0.514073	0.553888	0.270823	-1.74231
4.9875e-08	0.0579439	0.0436394	0.00873732	0.00697051	0.0072161	0		4.9875e-08	0.542531	-1.54249	-0.0639119	-1.53752	0.452656
4.99e-08	0.0614152	0.0539317	0.00887824	0.00679178	0.00493733	7.62021e-05		4.99e-08	1.46302	0.727075	0.0767606	0.155495	-1.55942
[truncated: 6,501 more rows]

## Sheet: Figure2_C_D
C										D
TCSPC					Frequency Domain					TCSPC			Frequency Domain
resting		active			resting		active			0uM	1uM	320uM	0uM	1200uM
average dist, r, resting	standarad deviation, sig, resting	average dist, r, active	standard deviation, sig, active		40.9327	4.24752	29.3524	0.685784		0.0646498	0.600615	0.958781	0.12687	1
41.6718	2.44508	28.8852	1.98537							0.0692789	0.576094	0.959616
41.6499	2.32905	28.8708	1.9572							0.0818907	0.701061	0.956917
41.7509	2.17795	28.7899	2.03218							0.0725012	0.513113	0.958461
41.7583	2.30268	28.7764	2.09112

## Sheet: Figure2_E
Distance	Apo-1	Apo-2	Apo-3	Apo-4	1uM cAMP- 1	1uM cAMP- 2	1uM cAMP- 3	1uM cAMP- 4	320uM cAMP - 1	320uM cAMP - 2	320uM cAMP - 3	320uM cAMP - 4		chiLife_Resting	chiLife_Active
0	1.05097e-43	0	0	0	7.39886e-43	4.2039e-45	0	0	1.38168e-42	5.60519e-45	0	0		0	0
0.392157	3.8816e-43	1.4013e-45	0	0	2.74514e-42	1.4013e-44	0	0	5.12735e-42	1.96182e-44	0	0		0	0
0.784314	1.42652e-42	7.00649e-45	0	0	1.00978e-41	5.74532e-44	0	0	1.88615e-41	7.84727e-44	0	0		0	0
1.17647	5.20022e-42	2.66247e-44	0	0	3.68051e-41	2.25609e-43	0	1.4013e-45	6.87477e-41	3.08286e-43	0	1.4013e-45		0	0
1.56863	1.87816e-41	1.02295e-43	0	0	1.32923e-40	8.81417e-43	0	4.2039e-45	2.4829e-40	1.20231e-42	0	7.00649e-45		0	0
1.96078	6.72133e-41	3.96567e-43	0	1.4013e-45	4.75692e-40	3.40095e-42	1.4013e-45	1.82169e-44	8.88561e-40	4.6411e-42	1.4013e-45	2.8026e-44		0	0
2.35294	2.38348e-40	1.51901e-42	0	8.40779e-45	1.68686e-39	1.29984e-41	4.2039e-45	7.14662e-44	3.15095e-39	1.77432e-41	8.40779e-45	1.14906e-43		0	0
2.7451	8.37517e-40	5.74813e-42	2.8026e-45	3.08286e-44	5.92736e-39	4.92122e-41	1.96182e-44	2.9147e-43	1.10719e-38	6.71726e-41	3.22299e-44	4.65231e-43		0	0
3.13725	2.9161e-39	2.15548e-41	9.80909e-45	1.26117e-43	2.06381e-38	1.84523e-40	8.12753e-44	1.17008e-42	3.85506e-38	2.51867e-40	1.35926e-43	1.86933e-42		0	0
3.52941	1.00609e-38	8.0038e-41	4.06377e-44	5.00264e-43	7.12041e-38	6.85201e-40	3.37713e-43	4.64951e-42	1.33004e-37	9.35269e-40	5.61921e-43	7.42268e-42		0	0
3.92157	3.43954e-38	2.94346e-40	1.65353e-43	1.96882e-42	2.43427e-37	2.51987e-39	1.37748e-42	1.82855e-41	4.54704e-37	3.43951e-39	2.29533e-42	2.9189e-41		0	0
4.31373	1.16517e-37	1.07204e-39	6.69821e-43	7.6609e-42	8.24629e-37	9.17766e-39	5.57577e-42	7.11762e-41	1.54035e-36	1.25271e-38	9.28781e-42	1.1362e-40		0	0
4.70588	3.91118e-37	3.86686e-39	2.68489e-42	2.95212e-41	2.76806e-36	3.31039e-38	2.23241e-41	2.74258e-40	5.17055e-36	4.51853e-38	3.71863e-41	4.37806e-40		0	0
5.09804	1.30093e-36	1.38133e-38	1.06373e-41	1.12603e-40	9.20705e-36	1.18255e-37	8.84584e-41	1.04611e-39	1.71981e-35	1.61413e-37	1.47348e-40	1.66994e-39		0	0
5.4902	4.2877e-36	4.88689e-38	4.17125e-41	4.25171e-40	3.03454e-35	4.18364e-37	3.46866e-40	3.94995e-39	5.66831e-35	5.71048e-37	5.77783e-40	6.30544e-39		0	0
5.88235	1.40031e-35	1.71222e-37	1.61865e-40	1.58916e-39	9.91042e-35	1.46582e-36	1.34601e-39	1.47638e-38	1.8512e-34	2.00078e-36	2.24208e-39	2.35679e-38		0	0
6.27451	4.53159e-35	5.94131e-37	6.21592e-40	5.87986e-39	3.20714e-34	5.08631e-36	5.1689e-39	5.46256e-38	5.99073e-34	6.94259e-36	8.60998e-39	8.72006e-38		0	0
6.66667	1.45313e-34	2.04172e-36	2.36223e-39	2.15357e-38	1.02842e-33	1.7479e-35	1.96433e-38	2.00073e-37	1.92103e-33	2.38581e-35	3.27204e-38	3.19382e-37		0	0
7.05882	4.61727e-34	6.94872e-36	8.88388e-39	7.80806e-38	3.26779e-33	5.94875e-35	7.38746e-38	7.25391e-37	6.104e-33	8.11978e-35	1.23055e-37	1.15796e-36		0	0
7.45098	1.45376e-33	2.34211e-35	3.30635e-38	2.80233e-37	1.02887e-32	2.00506e-34	2.74942e-37	2.60345e-36	1.92187e-32	2.73682e-34	4.57978e-37	4.15597e-36		0	0
7.84314	4.53555e-33	7.81811e-35	1.21775e-37	9.95612e-37	3.20995e-32	6.69303e-34	1.01263e-36	9.24952e-36	5.99596e-32	9.13569e-34	1.68677e-36	1.47653e-35		0	0
8.23529	1.40214e-32	2.58458e-34	4.43849e-37	3.50149e-36	9.9234e-32	2.21264e-33	3.69086e-36	3.25298e-35	1.85362e-31	3.02016e-33	6.14797e-36	5.19284e-35		0	0
8.62745	4.2952e-32	8.46199e-34	1.60095e-36	1.21901e-35	3.03984e-31	7.24425e-33	1.33128e-35	1.1325e-34	5.67822e-31	9.88808e-33	2.21755e-35	1.80784e-34		0	0
9.01961	1.30377e-31	2.74377e-33	5.71456e-36	4.20104e-35	9.22717e-31	2.34893e-32	4.75198e-35	3.90289e-34	1.72357e-30	3.20618e-32	7.91551e-35	6.2303e-34		0	0
9.41176	3.92144e-31	8.81085e-33	2.01862e-35	1.43317e-34	2.77532e-30	7.5429e-32	1.6786e-34	1.33146e-33	5.18411e-30	1.02957e-31	2.79608e-34	2.12545e-33		0	0
9.80392	1.16874e-30	2.80208e-32	7.05651e-35	4.83985e-34	8.27152e-30	2.39884e-31	5.86789e-34	4.49636e-33	1.54506e-29	3.27431e-31	9.77431e-34	7.17769e-33		0	0
10.1961	3.45157e-30	8.82544e-32	2.44113e-34	1.61793e-33	2.44278e-29	7.5554e-31	2.02994e-33	1.5031e-32	4.56295e-29	1.03128e-30	3.38133e-33	2.39945e-32		0	0
10.5882	1.01005e-29	2.75287e-31	8.35712e-34	5.35401e-33	7.14844e-29	2.35672e-30	6.94943e-33	4.97403e-32	1.33528e-28	3.21681e-30	1.15759e-32	7.9402e-32		0	0
10.9804	2.92885e-29	8.50412e-31	2.83131e-33	1.75385e-32	2.07284e-28	7.28032e-30	2.3544e-32	1.62937e-31	3.87192e-28	9.93732e-30	3.92179e-32	2.60102e-31		0	0
11.3725	8.41547e-29	2.60175e-30	9.49258e-33	5.68718e-32	5.95588e-28	2.22734e-29	7.89362e-32	5.28355e-31	1.11252e-27	3.04023e-29	1.31486e-31	8.43431e-31		0	0
11.7647	2.396e-28	7.88309e-30	3.14953e-32	1.82556e-31	1.69572e-27	6.74866e-29	2.61901e-31	1.69599e-30	3.16749e-27	9.21162e-29	4.36256e-31	2.70737e-30		0	0
12.1569	6.75963e-28	2.36549e-29	1.03412e-31	5.80078e-31	4.78399e-27	2.02508e-28	8.59931e-31	5.38909e-30	8.93617e-27	2.76414e-28	1.43241e-30	8.60278e-30		0	0
12.549	1.88967e-27	7.02971e-29	3.36018e-31	1.82461e-30	1.33738e-26	6.01809e-28	2.79418e-30	1.69512e-29	2.49813e-26	8.21443e-28	4.65435e-30	2.70597e-29		0	0
12.9412	5.23451e-27	2.06894e-28	1.08048e-30	5.6813e-30	3.70462e-26	1.77121e-27	8.98486e-30	5.27808e-29	6.91998e-26	2.41762e-27	1.49663e-29	8.42558e-29		0	0
13.3333	1.43679e-26	6.03049e-28	3.43827e-30	1.75112e-29	1.01686e-25	5.16266e-27	2.85912e-29	1.62684e-28	1.89943e-25	7.04681e-27	4.76251e-29	2.59698e-28		0	0
13.7255	3.90785e-26	1.74081e-27	1.08274e-29	5.34293e-29	2.76571e-25	1.49029e-26	9.00365e-29	4.96373e-28	5.16615e-25	2.03418e-26	1.49976e-28	7.92377e-28		0	0
14.1176	1.0532e-25	4.97671e-27	3.37425e-29	1.61374e-28	7.45381e-25	4.26052e-26	2.80588e-28	1.49921e-27	1.39232e-24	5.81542e-26	4.67384e-28	2.39324e-27		0	0
14.5098	2.81261e-25	1.40905e-26	1.04062e-28	4.82484e-28	1.99057e-24	1.20628e-25	8.65338e-28	4.48241e-27	3.71825e-24	1.64652e-25	1.44142e-27	7.15542e-27		0	0
14.902	7.4428e-25	3.95098e-26	3.17596e-28	1.42799e-27	5.2675e-24	3.38241e-25	2.64099e-27	1.32664e-26	9.83933e-24	4.61684e-25	4.39918e-27	2.11776e-26		0	0
15.2941	1.9516e-24	1.09718e-25	9.59226e-28	4.18367e-27	1.38121e-23	9.39286e-25	7.97652e-27	3.88675e-26	2.58e-23	1.28208e-24	1.32867e-26	6.20455e-26		0	0
15.6863	5.07074e-24	3.01746e-25	2.86703e-27	1.21335e-26	3.58872e-23	2.58323e-24	2.3841e-26	1.12723e-25	6.70349e-23	3.52599e-24	3.97127e-26	1.79944e-25		0	0
16.0784	1.30551e-23	8.21866e-25	8.48025e-27	3.4834e-26	9.23949e-23	7.03594e-24	7.05182e-26	3.23618e-25	1.72587e-22	9.60374e-24	1.17464e-25	5.16602e-25		0	0
16.4706	3.33055e-23	2.21694e-24	2.48228e-26	9.89957e-26	2.35713e-22	1.8979e-23	2.06416e-25	9.19698e-25	4.40296e-22	2.59056e-23	3.43832e-25	1.46814e-24		0	0
16.8627	8.41936e-23	5.92242e-24	7.19046e-26	2.78498e-25	5.95864e-22	5.07014e-23	5.97928e-25	2.58732e-24	1.11303e-21	6.92052e-23	9.95985e-25	4.13022e-24		0	0
17.2549	2.10897e-22	1.56689e-23	2.06124e-25	7.75567e-25	1.49258e-21	1.3414e-22	1.71404e-24	7.20524e-24	2.78804e-21	1.83096e-22	2.85512e-24	1.1502e-23		0	0
17.6471	5.23464e-22	4.10555e-23	5.84742e-25	2.13801e-24	3.70472e-21	3.51473e-22	4.86247e-24	1.98627e-23	6.92016e-21	4.79746e-22	8.09954e-24	3.17075e-23		0	0
18.0392	1.28745e-21	1.06536e-22	1.64159e-24	5.83437e-24	9.11171e-21	9.1205e-22	1.36508e-23	5.42029e-23	1.702e-20	1.24491e-21	2.27385e-23	8.65259e-23		0	6.03e-09
18.4314	3.13765e-21	2.7379e-22	4.5607e-24	1.57605e-23	2.22061e-20	2.3439e-21	3.79249e-23	1.4642e-22	4.14794e-20	3.19932e-21	6.31725e-23	2.33734e-22		0	8.32e-08
18.8235	7.57711e-21	6.96837e-22	1.2539e-23	4.21444e-23	5.36255e-20	5.96557e-21	1.04269e-22	3.91533e-22	1.00169e-19	8.14274e-21	1.73684e-22	6.25017e-22		0	5.38e-07
19.2157	1.81314e-20	1.75646e-21	3.41161e-23	1.11558e-22	1.28321e-19	1.50369e-20	2.83695e-22	1.03641e-21	2.39695e-19	2.05247e-20	4.72559e-22	1.65445e-21		0	2.57e-06
19.6078	4.29917e-20	4.38468e-21	9.18589e-23	2.92319e-22	3.04265e-19	3.7537e-20	7.6386e-22	2.71573e-21	5.68346e-19	5.12363e-20	1.27238e-21	4.3352e-21		0	9.67e-06
20	1.0101e-19	1.08401e-20	2.44764e-22	7.58236e-22	7.1488e-19	9.28011e-20	2.03535e-21	7.04423e-21	1.33535e-18	1.26669e-19	3.39035e-21	1.12449e-20		0	3.02e-05
20.3922	2.35166e-19	2.65411e-20	6.45415e-22	1.94691e-21	1.66434e-18	2.27217e-19	5.367e-21	1.80873e-20	3.10887e-18	3.10141e-19	8.93996e-21	2.88734e-20		0	8.19e-05
20.7843	5.42513e-19	6.43577e-20	1.68421e-21	4.94856e-21	3.83953e-18	5.50962e-19	1.40052e-20	4.59735e-20	7.17197e-18	7.52038e-19	2.33288e-20	7.3389e-20		0	0.00019796
21.1765	1.24015e-18	1.54552e-19	4.34928e-21	1.2451e-20	8.77689e-18	1.32311e-18	3.61668e-20	1.15674e-19	1.63946e-17	1.80599e-18	6.0244e-20	1.84653e-19		0	0.000430387
21.5686	2.80908e-18	3.67572e-19	1.11149e-20	3.10116e-20	1.98807e-17	3.14676e-18	9.24264e-20	2.88107e-19	3.71358e-17	4.29519e-18	1.53957e-19	4.59914e-19		0	0.000846639
21.9608	6.30494e-18	8.65773e-19	2.81096e-20	7.64604e-20	4.4622e-17	7.41183e-18	2.33748e-19	7.10339e-19	8.33508e-17	1.01168e-17	3.8936e-19	1.13394e-18		0	0.00151891
22.3529	1.40225e-17	2.01957e-18	7.03513e-20	1.86613e-19	9.92416e-17	1.72894e-17	5.85011e-19	1.73369e-18	1.85377e-16	2.35993e-17	9.7447e-19	2.76754e-18		0	0.00250823
22.7451	3.09028e-17	4.6656e-18	1.74242e-19	4.50857e-19	2.18709e-16	3.99419e-17	1.44892e-18	4.18859e-18	4.08533e-16	5.45189e-17	2.41351e-18	6.68638e-18		0	0.00386033
23.1373	6.74835e-17	1.06745e-17	4.27071e-19	1.07827e-18	4.77601e-16	9.13841e-17	3.55134e-18	1.00175e-17	8.92127e-16	1.24735e-16	5.91557e-18	1.59912e-17		0	0.00562225
23.5294	1.46024e-16	2.41872e-17	1.03589e-18	2.55278e-18	1.03346e-15	2.07065e-16	8.61398e-18	2.3716e-17	1.93043e-15	2.82634e-16	1.43486e-17	3.78586e-17		0	0.00787296
23.9216	3.13097e-16	5.42768e-17	2.4865e-18	5.98259e-18	2.21588e-15	4.6466e-16	2.06767e-17	5.55799e-17	4.13911e-15	6.3424e-16	3.44417e-17	8.8724e-17		4.74e-11	0.0107472
24.3137	6.65211e-16	1.20625e-16	5.9065e-18	1.3879e-17	4.7079e-15	1.03266e-15	4.91159e-17	1.2894e-16	8.79404e-15	1.40953e-15	8.18138e-17	2.05831e-16		1.56e-09	0.014422
24.7059	1.40045e-15	2.65493e-16	1.38847e-17	3.18728e-17	9.91142e-15	2.27286e-15	1.15459e-16	2.96107e-16	1.85139e-14	3.10236e-15	1.92324e-16	4.72685e-16		1.82e-08	0.0190694
25.098	2.92149e-15	5.78711e-16	3.23004e-17	7.2456e-17	2.06763e-14	4.95431e-15	2.68597e-16	6.73137e-16	3.86218e-14	6.76241e-15	4.47409e-16	1.07455e-15		1.3e-07	0.0248075
25.4902	6.03903e-15	1.24929e-15	7.4361e-17	1.6305e-16	4.27401e-14	1.06951e-14	6.18354e-16	1.51479e-15	7.98355e-14	1.45984e-14	1.03001e-15	2.4181e-15		6.44e-07	0.0316948
25.8824	1.23697e-14	2.67092e-15	1.69413e-16	3.63214e-16	8.75438e-14	2.28656e-14	1.40877e-15	3.37436e-15	1.63526e-13	3.12105e-14	2.34662e-15	5.3866e-15		2.71e-06	0.0397831
26.2745	2.51059e-14	5.65524e-15	3.81956e-16	8.00932e-16	1.77682e-13	4.84141e-14	3.17618e-15	7.44088e-15	3.31898e-13	6.60831e-14	5.29066e-15	1.18781e-14		9.01e-06	0.0492085
26.6667	5.04917e-14	1.18586e-14	8.52207e-16	1.74832e-15	3.57345e-13	1.01521e-13	7.08659e-15	1.62424e-14	6.67497e-13	1.38572e-13	1.18043e-14	2.59283e-14		2.56e-05	0.0602649
27.0588	1.00622e-13	2.4627e-14	1.88166e-15	3.77781e-15	7.12132e-13	2.1083e-13	1.56471e-14	3.5097e-14	1.33021e-12	2.87774e-13	2.60638e-14	5.60264e-14		6.47e-05	0.0734197
27.451	1.98697e-13	5.06503e-14	4.11153e-15	8.08076e-15	1.40624e-12	4.33614e-13	3.41898e-14	7.50725e-14	2.62676e-12	5.91864e-13	5.69508e-14	1.19841e-13		0.000146103	0.089232
27.8431	3.88793e-13	1.03168e-13	8.89059e-15	1.71103e-14	2.75161e-12	8.83217e-13	7.39303e-14	1.58959e-13	5.13982e-12	1.20555e-12	1.23148e-13	2.53752e-13		0.000297552	0.108149
28.2353	7.53829e-13	2.08115e-13	1.90249e-14	3.58636e-14	5.33508e-12	1.78166e-12	1.58203e-13	3.33183e-13	9.96556e-12	2.43189e-12	2.63523e-13	5.31871e-13		0.000548721	0.130165
28.6275	1.44829e-12	4.15772e-13	4.02883e-14	7.44122e-14	1.025e-11	3.55939e-12	3.3502e-13	6.91311e-13	1.91462e-11	4.85841e-12	5.58053e-13	1.10356e-12		0.000923932	0.154405
29.0196	2.75717e-12	8.2262e-13	8.44308e-14	1.52837e-13	1.95133e-11	7.04239e-12	7.02091e-13	1.4199e-12	3.64495e-11	9.61255e-12	1.16949e-12	2.26662e-12		0.0014352	0.178787
29.4118	5.20115e-12	1.6119e-12	1.75101e-13	3.10744e-13	3.68101e-11	1.37993e-11	1.45606e-12	2.8869e-12	6.87587e-11	1.88355e-11	2.4254e-12	4.60846e-12		0.00208307	0.200028
29.8039	9.72215e-12	3.12801e-12	3.59368e-13	6.2542e-13	6.88066e-11	2.67787e-11	2.98835e-12	5.81033e-12	1.28526e-10	3.65518e-11	4.97778e-12	9.27522e-12		0.00286517	0.214196
30.1961	1.80075e-11	6.01165e-12	7.29888e-13	1.24604e-12	1.27444e-10	5.14653e-11	6.06944e-12	1.15761e-11	2.38057e-10	7.02479e-11	1.011e-11	1.84793e-11		0.00378533	0.217769
30.5882	3.30499e-11	1.14423e-11	1.46703e-12	2.45747e-12	2.33904e-10	9.79565e-11	1.21992e-11	2.28306e-11	4.36917e-10	1.33706e-10	2.03205e-11	3.64452e-11		0.00485911	0.208835
30.9804	6.01057e-11	2.15687e-11	2.918e-12	4.79772e-12	4.25386e-10	1.84648e-10	2.42648e-11	4.45722e-11	7.94592e-10	2.52037e-10	4.04186e-11	7.1152e-11		0.00611786	0.187908
31.3725	1.08315e-10	4.02652e-11	5.74377e-12	9.27203e-12	7.66576e-10	3.44708e-10	4.77628e-11	8.61398e-11	1.43191e-09	4.70511e-10	7.95598e-11	1.37508e-10		0.00761867	0.157967
31.7647	1.93414e-10	7.44439e-11	1.11886e-11	1.77381e-11	1.36885e-09	6.37309e-10	9.30393e-11	1.64792e-10	2.55691e-09	8.69898e-10	1.54978e-10	2.63063e-10		0.00945755	0.123639
32.1569	3.42227e-10	1.36308e-10	2.15683e-11	3.35918e-11	2.42204e-09	1.16692e-09	1.79353e-10	3.12078e-10	4.52421e-09	1.5928e-09	2.98753e-10	4.9818e-10		0.0117637	0.0898539
32.549	6.00023e-10	2.47177e-10	4.11456e-11	6.29727e-11	4.24655e-09	2.11606e-09	3.42149e-10	5.85034e-10	7.93226e-09	2.88833e-09	5.69927e-10	9.33909e-10		0.0146639	0.0605252
32.9412	1.04244e-09	4.43902e-10	7.76774e-11	1.16859e-10	7.37764e-09	3.80022e-09	6.45933e-10	1.08566e-09	1.37809e-08	5.18713e-09	1.07595e-09	1.73307e-09		0.0182181	0.0377622
33.3333	1.79456e-09	7.89515e-10	1.45122e-10	2.14668e-10	1.27007e-08	6.75898e-09	1.20677e-09	1.99433e-09	2.3724e-08	9.22571e-09	2.01015e-09	3.18361e-09		0.02237	0.021838
33.7255	3.06122e-09	1.39068e-09	2.68308e-10	3.9036e-10	2.16652e-08	1.19055e-08	2.23114e-09	3.62655e-09	4.04691e-08	1.62505e-08	3.71647e-09	5.78918e-09		0.026959	0.0117343
34.1176	5.17437e-09	2.42598e-09	4.90909e-10	7.02675e-10	3.66206e-08	2.07686e-08	4.08219e-09	6.52805e-09	6.84048e-08	2.83483e-08	6.79982e-09	1.04209e-08		0.0317905	0.00588593
34.5098	8.66658e-09	4.19122e-09	8.88859e-10	1.2521e-09	6.1336e-08	3.58808e-08	7.39138e-09	1.16323e-08	1.14572e-07	4.89756e-08	1.2312e-08	1.85691e-08		0.0367343	0.00277608
34.902	1.43835e-08	7.17113e-09	1.59269e-09	2.20858e-09	1.01797e-07	6.13916e-08	1.32441e-08	2.05183e-08	1.90149e-07	8.37968e-08	2.20611e-08	3.27541e-08		0.0417718	0.00124291
35.2941	2.36543e-08	1.21515e-08	2.82418e-09	3.85639e-09	1.67409e-07	1.04028e-07	2.34847e-08	3.5827e-08	3.12708e-07	1.41993e-07	3.91191e-08	5.71918e-08		0.0469825	0.000533758
35.6863	3.85463e-08	2.03921e-08	4.95586e-09	6.66565e-09	2.72804e-07	1.74576e-07	4.12109e-08	6.19258e-08	5.0958e-07	2.38288e-07	6.86461e-08	9.88542e-08		0.0524838	0.000222681
36.0784	6.22419e-08	3.38914e-08	8.6062e-09	1.1405e-08	4.40505e-07	2.90142e-07	7.15655e-08	1.05956e-07	8.22833e-07	3.96031e-07	1.19209e-07	1.69141e-07		0.0583707	9.06e-05
36.4706	9.95886e-08	5.57842e-08	1.479e-08	1.93172e-08	7.04819e-07	4.77565e-07	1.22987e-07	1.79462e-07	1.31655e-06	6.51855e-07	2.04864e-07	2.86481e-07		0.0646821	3.57e-05
36.8627	1.57893e-07	9.09339e-08	2.5153e-08	3.23879e-08	1.11746e-06	7.78479e-07	2.09162e-07	3.00893e-07	2.08734e-06	1.06259e-06	3.48407e-07	4.80325e-07		0.0714027	1.34e-05
37.2549	2.48053e-07	1.46803e-07	4.23329e-08	5.37546e-08	1.75555e-06	1.25677e-06	3.52022e-07	4.99396e-07	3.27925e-06	1.71543e-06	5.86373e-07	7.97202e-07		0.0785152	4.67e-06
37.6471	3.86148e-07	2.34712e-07	7.05066e-08	8.83164e-08	2.73289e-06	2.00935e-06	5.86303e-07	8.20484e-07	5.10485e-06	2.74268e-06	9.76622e-07	1.30977e-06		0.0860625	1.47e-06
38.0392	5.95648e-07	3.71647e-07	1.16211e-07	1.43635e-07	4.21558e-06	3.18165e-06	9.66361e-07	1.33441e-06	7.87442e-06	4.3428e-06	1.6097e-06	2.13016e-06		0.0941818	4e-07
38.4314	9.10444e-07	5.828e-07	1.89552e-07	2.31244e-07	6.44349e-06	4.98931e-06	1.57624e-06	2.14832e-06	1.2036e-05	6.81019e-06	2.62558e-06	3.42944e-06		0.103069	8.13e-08
38.8235	1.37893e-06	9.0511e-07	3.05968e-07	3.68531e-07	9.75914e-06	7.74859e-06	2.5443e-06	3.42376e-06	1.82294e-05	1.05765e-05	4.23812e-06	5.46546e-06		0.112859	9.29e-09
39.2157	2.06948e-06	1.39212e-06	4.88752e-07	5.81395e-07	1.46463e-05	1.19179e-05	4.06426e-06	5.40132e-06	2.73584e-05	1.62673e-05	6.76995e-06	8.62231e-06		0.123463	0
39.6078	3.07756e-06	2.12054e-06	7.7262e-07	9.07948e-07	2.17808e-05	1.81538e-05	6.42478e-06	8.43509e-06	4.06851e-05	2.47791e-05	1.07019e-05	1.34652e-05		0.134431	0
40	4.53502e-06	3.19896e-06	1.20867e-06	1.4036e-06	3.20957e-05	2.73861e-05	1.00508e-05	1.30398e-05	5.99526e-05	3.73808e-05	1.67419e-05	2.08159e-05		0.14486	0
40.3922	6.62184e-06	4.77931e-06	1.87118e-06	2.14792e-06	4.68648e-05	4.09154e-05	1.55599e-05	1.99548e-05	8.75402e-05	5.58476e-05	2.59186e-05	3.18545e-05		0.153371	0
40.7843	9.58089e-06	7.07156e-06	2.86674e-06	3.25377e-06	6.78068e-05	6.05391e-05	2.38386e-05	3.02284e-05	0.000126659	8.26332e-05	3.97086e-05	4.82546e-05		0.158201	0
41.1765	1.3736e-05	1.03623e-05	4.34636e-06	4.87919e-06	9.72137e-05	8.87113e-05	3.61425e-05	4.5329e-05	0.000181589	0.000121087	6.02035e-05	7.23602e-05		0.157476	0
41.5686	1.95138e-05	1.50382e-05	6.5212e-06	7.24271e-06	0.000138105	0.000128741	5.42275e-05	6.72869e-05	0.000257971	0.000175725	9.03283e-05	0.000107412		0.149745	0
41.9608	2.74695e-05	2.16135e-05	9.68267e-06	1.06426e-05	0.00019441	0.000185032	8.05169e-05	9.88728e-05	0.000363144	0.00025256	0.000134119	0.000157834		0.134664	0
42.3529	3.83165e-05	3.07644e-05	1.42275e-05	1.54806e-05	0.000271178	0.000263372	0.00011831	0.000143819	0.000506542	0.000359491	0.000197071	0.000229583		0.113483	0
42.7451	5.29602e-05	4.33677e-05	2.06883e-05	2.22905e-05	0.000374815	0.000371268	0.000172035	0.000207085	0.000700129	0.000506764	0.000286564	0.000330576		0.0889504	0
43.1373	7.25337e-05	6.05448e-05	2.97706e-05	3.1772e-05	0.000513343	0.00051832	0.000247559	0.000295171	0.00095889	0.000707483	0.000412367	0.000471191		0.0645247	0
43.5294	9.84369e-05	8.37107e-05	4.2395e-05	4.48294e-05	0.000696668	0.000716642	0.000352539	0.000416478	0.00130133	0.000978184	0.000587234	0.000664836		0.0432521	0
43.9216	0.000132374	0.000114625	5.97457e-05	6.26143e-05	0.000936852	0.000981295	0.00049682	0.000581704	0.00174998	0.00133942	0.000827567	0.000928593		0.0268966	0
44.3137	0.000176391	0.000155443	8.33229e-05	8.65719e-05	0.00124837	0.00133073	0.000692878	0.000804277	0.00233187	0.00181639	0.00115415	0.00128389		0.0157252	0
44.7059	0.000232903	0.000208764	0.000114997	0.000118488	0.00164833	0.00178721	0.000956267	0.00110078	0.00307896	0.00243946	0.00159288	0.00175722		0.00890343	0
45.098	0.000304721	0.000277673	0.000157063	0.000160532	0.0021566	0.00237714	0.00130607	0.00149139	0.00402839	0.00324468	0.00217556	0.00238076		0.00514964	0
45.4902	0.000395054	0.000365767	0.000212289	0.0002153	0.00279592	0.00313131	0.0017653	0.0020002	0.00522258	0.0042741	0.00294051	0.00319299		0.00326205	0
45.8824	0.000507502	0.000477167	0.000283952	0.000285838	0.00359175	0.00408499	0.00236122	0.00265551	0.00670914	0.00557583	0.00393315	0.00423908		0.00236366	0
46.2745	0.000646021	0.000616494	0.000375861	0.000375653	0.00457209	0.00527776	0.0031255	0.00348993	0.00854035	0.00720391	0.00520623	0.00557108		0.00191778	0
46.6667	0.00081486	0.000788826	0.00049235	0.000488706	0.00576701	0.00675308	0.00409418	0.00454022	0.0107724	0.00921766	0.00681979	0.0072477		0.00163587	0
47.0588	0.00101847	0.000999601	0.000638244	0.000629363	0.00720799	0.00855752	0.00530737	0.00584696	0.013464	0.0116806	0.00884063	0.0093337		0.00138226	0
47.451	0.00126135	0.00125449	0.000818775	0.00080232	0.00892698	0.0107396	0.00680858	0.00745378	0.016675	0.014659	0.0113412	0.0118987		0.0011117	0
47.8431	0.00154794	0.00155919	0.00103946	0.00101248	0.0109553	0.0133481	0.00864369	0.00940624	0.0204637	0.0182196	0.014398	0.0150155		0.000830681	0
48.2353	0.00188235	0.00191922	0.00130591	0.00126479	0.0133219	0.0164303	0.0108594	0.0117503	0.0248845	0.0224267	0.0180889	0.0187573		0.000567819	0
48.6275	0.00226815	0.00233962	0.00162363	0.00156402	0.0160524	0.0200293	0.0135014	0.0145302	0.0299848	0.0273391	0.0224897	0.0231951		0.000351291	0
49.0196	0.00270815	0.00282461	0.00199767	0.00191453	0.0191664	0.0241813	0.0166118	0.0177865	0.0358015	0.0330064	0.0276708	0.0283931		0.000195142	0
49.4118	0.00320405	0.00337726	0.00243236	0.00231991	0.022676	0.0289125	0.0202265	0.0215526	0.0423573	0.0394643	0.0336918	0.0344052		9.67e-05	0
49.8039	0.00375624	0.00399913	0.00293086	0.00278275	0.0265841	0.0342363	0.0243718	0.0258526	0.0496572	0.046731	0.0405968	0.0412693		4.25e-05	0
50.1961	0.0043635	0.00468985	0.00349484	0.00330424	0.0308818	0.0401495	0.0290616	0.0306973	0.0576851	0.0548023	0.0484088	0.0490031		1.65e-05	0
50.5882	0.00502278	0.00544686	0.00412406	0.00388383	0.0355477	0.0466302	0.034294	0.0360819	0.0664007	0.0636482	0.0571244	0.0575986		5.57e-06	0
50.9804	0.00572902	0.00626509	0.00481602	0.00451899	0.040546	0.053635	0.040048	0.0419827	0.0757371	0.0732094	0.066709	0.0670184		1.58e-06	0
51.3725	0.00647506	0.00713677	0.00556565	0.00520495	0.0458259	0.0610974	0.0462816	0.0483554	0.0855997	0.0833952	0.0770925	0.0771914		3.28e-07	0
51.7647	0.0072516	0.00805137	0.00636515	0.0059345	0.0513218	0.0689272	0.0529299	0.0551332	0.0958656	0.0940826	0.0881668	0.0880108		3.79e-08	0
52.1569	0.00804733	0.00899562	0.00720388	0.00669799	0.0569534	0.0770109	0.0599044	0.0622262	0.106385	0.105116	0.0997844	0.0993337		7.51e-10	0
52.549	0.00884906	0.00995373	0.00806843	0.00748337	0.0626275	0.0852132	0.0670937	0.0695226	0.116984	0.116312	0.11176	0.110981		0	0
52.9412	0.00964206	0.0109077	0.00894287	0.00827644	0.0682398	0.0933803	0.0743651	0.0768904	0.127467	0.12746	0.123872	0.122743		0	0
53.3333	0.0104105	0.0118379	0.00980911	0.00906113	0.0736779	0.101344	0.0815684	0.0841804	0.137625	0.13833	0.135871	0.13438		0	0
53.7255	0.0111377	0.0127236	0.0106475	0.00982006	0.0788251	0.108926	0.0885401	0.0912311	0.14724	0.148679	0.147484	0.145635		0	0
54.1176	0.0118073	0.0135438	0.0114375	0.0105351	0.0835639	0.115947	0.0951092	0.097874	0.156092	0.158263	0.158426	0.156239		0	0
54.5098	0.0124032	0.0142778	0.0121585	0.0111881	0.087781	0.122232	0.101105	0.10394	0.163969	0.166841	0.168413	0.165923		0	0
54.902	0.0129105	0.0149066	0.0127906	0.0117616	0.0913712	0.127614	0.106361	0.109268	0.170675	0.174188	0.177169	0.174429		0	0
55.2941	0.0133161	0.015413	0.0133159	0.0122397	0.0942422	0.13195	0.110729	0.11371	0.176038	0.180106	0.184444	0.181518		0	0
55.6863	0.0136095	0.015783	0.0137187	0.0126086	0.0963183	0.135118	0.114079	0.117137	0.179916	0.18443	0.190024	0.186989		0	0
56.0784	0.0137826	0.0160062	0.0139869	0.0128575	0.0975438	0.137028	0.116309	0.119449	0.182205	0.187037	0.193739	0.19068		0	0
56.4706	0.0138309	0.016076	0.0141122	0.0129789	0.0978853	0.137625	0.117351	0.120577	0.182843	0.187852	0.195474	0.192481		0	0
56.8627	0.013753	0.0159905	0.0140907	0.0129693	0.0973336	0.136893	0.117172	0.120486	0.181813	0.186853	0.195176	0.192336		0	0
57.2549	0.0135509	0.0157521	0.0139231	0.0128288	0.0959038	0.134852	0.115778	0.119181	0.179142	0.184067	0.192855	0.190252		0	0
57.6471	0.0132303	0.0153677	0.0136147	0.0125619	0.0936344	0.131562	0.113212	0.116699	0.174903	0.179576	0.188581	0.186289		0	0
58.0392	0.0127997	0.0148482	0.0131748	0.0121763	0.0905863	0.127114	0.109554	0.113115	0.169209	0.173505	0.182487	0.180568		0	0
58.4314	0.0122703	0.0142079	0.0126167	0.0116836	0.0868395	0.121633	0.104912	0.108534	0.16221	0.166023	0.174755	0.173255		0	0
58.8235	0.0116558	0.0134643	0.0119569	0.0110979	0.0824896	0.115266	0.0994235	0.103087	0.154085	0.157333	0.165612	0.16456		0	0
59.2157	0.0109714	0.0126366	0.0112139	0.0104354	0.0776442	0.10818	0.0932433	0.0969255	0.145034	0.14766	0.155317	0.154724		0	0
59.6078	0.0102332	0.0117455	0.0104082	0.00971391	0.072418	0.10055	0.0865391	0.0902121	0.135271	0.137247	0.14415	0.144006		0	0
60	0.00945797	0.010812	0.00956023	0.00895172	0.0669286	0.0925584	0.0794826	0.0831163	0.125017	0.126338	0.132395	0.132678		0	0
60.3922	0.00866218	0.00985696	0.00869065	0.00816711	0.0612922	0.0843803	0.0722435	0.0758059	0.114488	0.115175	0.120336	0.121006		0	0
60.7843	0.00786158	0.00889979	0.00781882	0.00737758	0.0556196	0.0761834	0.0649819	0.0684411	0.103891	0.103987	0.108239	0.109248		0	0
61.1765	0.00707069	0.00795835	0.00696245	0.00659932	0.0500128	0.0681198	0.0578435	0.0611689	0.0934164	0.09298	0.0963467	0.0976357		0	0
61.5686	0.0063025	0.0070483	0.00613706	0.00584672	0.0445622	0.0603227	0.0509551	0.0541187	0.0832332	0.082337	0.0848703	0.0863772		0	0
61.9608	0.00556816	0.00618274	0.00535565	0.00513217	0.039345	0.0529034	0.0444219	0.0473997	0.0734848	0.0722095	0.0739844	0.0756455		0	0
62.3529	0.00487683	0.00537212	0.00462858	0.00446583	0.0344234	0.0459497	0.0383255	0.0410984	0.0642874	0.0627174	0.063825	0.0655786		0	0
62.7451	0.00423573	0.00462418	0.00396355	0.00385566	0.0298449	0.0395258	0.0327246	0.0352788	0.0557293	0.053948	0.0544889	0.0562777		0	0
63.1373	0.00365014	0.00394411	0.00336582	0.0033076	0.0256422	0.0336729	0.0276551	0.0299829	0.0478707	0.0459575	0.0460356	0.047809		0	0
63.5294	0.00312367	0.00333478	0.00283849	0.00282578	0.0218344	0.0284112	0.0231328	0.025232	0.0407462	0.0387734	0.0384901	0.0402053		0	0
63.9216	0.00265843	0.00279705	0.0023829	0.00241288	0.0184278	0.0237421	0.0191554	0.0210296	0.0343666	0.0323971	0.0318476	0.0334706		0	0
64.3137	0.00225546	0.00233024	0.00199913	0.00207056	0.0154183	0.0196514	0.0157062	0.017364	0.0287226	0.0268089	0.0260787	0.0275841		0	0
64.7059	0.00191501	0.00193253	0.00168647	0.00179993	0.0127929	0.0161119	0.0127568	0.0142112	0.0237877	0.0219712	0.0211341	0.0225052		0	0
65.098	0.00163704	0.00160146	0.00144401	0.00160199	0.010532	0.0130873	0.010271	0.0115385	0.0195225	0.0178336	0.0169507	0.0181787		0	0
65.4902	0.00142158	0.00133443	0.00127116	0.00147817	0.00861109	0.0105348	0.00820753	0.0093073	0.0158779	0.0143366	0.0134565	0.0145392		0	0
65.8824	0.00126923	0.0011292	0.00116815	0.0014308	0.00700297	0.00840789	0.00652273	0.00747586	0.0127983	0.0114156	0.0105747	0.0115155		0	0
66.2745	0.00118155	0.000984381	0.00113656	0.0014635	0.00567922	0.00665915	0.00517325	0.00600187	0.0102252	0.0090041	0.00822793	0.0090347		0	0
66.6667	0.00116154	0.000899882	0.00117979	0.00158162	0.00461186	0.00524199	0.0041178	0.00484435	0.00809926	0.00703626	0.00634108	0.00702471		0	0
67.0588	0.00121399	0.000877415	0.00130342	0.00179262	0.00377449	0.00411245	0.00331866	0.00396522	0.00636251	0.00544924	0.00484364	0.00541709		0	0
67.451	0.00134595	0.000920923	0.00151564	0.00210629	0.00314338	0.00323034	0.0027427	0.00333046	0.00496014	0.00418464	0.00367126	0.00414853		0	0
67.8431	0.00156704	0.00103703	0.00182755	0.00253504	0.00269819	0.00256015	0.00236212	0.00291086	0.00384149	0.00318955	0.00276664	0.003162		0	0
68.2353	0.00188981	0.00123545	0.0022534	0.00309404	0.00242249	0.00207157	0.00215468	0.00268239	0.0029609	0.00241708	0.00207997	0.0024073		0	0
68.6275	0.00232996	0.00152939	0.00281082	0.00380127	0.00230413	0.0017397	0.00210384	0.00262634	0.00227801	0.0018266	0.00156885	0.00184117		0	0
69.0196	0.00290663	0.00193593	0.00352088	0.00467752	0.00233534	0.0015451	0.00219857	0.00272916	0.00175791	0.0013836	0.00119794	0.00142714		0	0
69.4118	0.00364243	0.00247629	0.00440813	0.00574626	0.00251276	0.00147368	0.00243303	0.00298216	0.00137095	0.00105938	0.000938417	0.00113501		0	0
69.8039	0.00456355	0.0031761	0.00550044	0.00703337	0.00283728	0.00151637	0.0028061	0.00338104	0.00109245	0.000830537	0.00076722	0.000940327		0	0
70.1961	0.00569957	0.00406547	0.0068288	0.00856678	0.00331375	0.00166881	0.00332088	0.00392533	0.000902286	0.000678446	0.000666334	0.000823624		0	0
70.5882	0.00708321	0.005179	0.00842683	0.010376	0.00395061	0.00193085	0.00398401	0.00461775	0.000784342	0.000588637	0.000622002	0.000769755		0	0
70.9804	0.00874988	0.00655551	0.0103302	0.0124912	0.0047594	0.00230614	0.00480504	0.00546351	0.00072603	0.000550192	0.000623993	0.000767172		0	0
71.3725	0.010737	0.00823759	0.0125758	0.0149428	0.00575415	0.00280149	0.00579567	0.00646959	0.000717738	0.000555166	0.00066492	0.000807262		0	0
71.7647	0.0130832	0.0102709	0.0152008	0.0177601	0.0069507	0.00342636	0.00696892	0.00764399	0.000752322	0.000598042	0.000739635	0.000883744		0	0
72.1569	0.0158269	0.012703	0.0182411	0.0209705	0.00836588	0.00419213	0.00833839	0.00899494	0.000824628	0.000675235	0.000844689	0.000992129		0	0
72.549	0.0190055	0.0155822	0.0217304	0.0245977	0.0100166	0.00511141	0.00991724	0.0105301	0.00093105	0.00078464	0.00097787	0.00112926		0	0
72.9412	0.0226532	0.0189554	0.025698	0.0286612	0.0119189	0.00619723	0.0117174	0.0122559	0.00106913	0.000925234	0.00113781	0.00129289		0	0
73.3333	0.0267996	0.0228667	0.0301675	0.033174	0.0140867	0.00746221	0.0137484	0.0141766	0.00123722	0.00109671	0.00132363	0.0014814		0	0
73.7255	0.0314678	0.0273543	0.0351546	0.0381418	0.0165312	0.00891761	0.0160168	0.0162937	0.00143413	0.00129915	0.0015347	0.00169342		0	0
74.1176	0.0366721	0.0324483	0.0406655	0.0435614	0.0192591	0.0105724	0.0185248	0.0186051	0.0016589	0.00153276	0.00177037	0.00192772		0	0
74.5098	0.0424164	0.0381682	0.0466948	0.0494196	0.0222717	0.0124323	0.0212697	0.0211047	0.00191054	0.00179757	0.00202977	0.00218293		0	0
74.902	0.0486921	0.0445196	0.0532243	0.0556918	0.0255642	0.0144986	0.0242428	0.0237818	0.00218784	0.00209327	0.00231168	0.00245744		0	0
75.2941	0.0554763	0.0514919	0.0602212	0.0623417	0.0291244	0.0167678	0.0274291	0.0266205	0.00248918	0.00241893	0.00261439	0.00274927		0	0
75.6863	0.062731	0.0590563	0.0676373	0.0693203	0.0329319	0.0192301	0.0308065	0.0295998	0.00281244	0.00277292	0.00293563	0.00305605		0	0
76.0784	0.0704013	0.0671632	0.0754086	0.0765661	0.0369578	0.0218693	0.0343459	0.0326934	0.0031549	0.00315273	0.00327249	0.00337488		0	0
76.4706	0.0784158	0.0757416	0.0834552	0.0840054	0.0411646	0.0246621	0.0380106	0.0358698	0.00351314	0.00355489	0.00362142	0.00370243		0	0
76.8627	0.0866862	0.0846984	0.0916818	0.0915529	0.045506	0.0275784	0.0417575	0.0390924	0.0038831	0.00397496	0.00397826	0.00403485		0	0
77.2549	0.0951088	0.0939191	0.0999795	0.0991132	0.0499272	0.0305805	0.0455367	0.0423204	0.00426004	0.0044075	0.00433822	0.00436791		0	0
77.6471	0.103565	0.103269	0.108227	0.106582	0.0543664	0.0336249	0.0492931	0.0455096	0.00463861	0.00484617	0.00469604	0.004697		0	0
78.0392	0.111926	0.112597	0.116294	0.11385	0.0587554	0.0366619	0.0529674	0.0486128	0.00501296	0.00528382	0.00504605	0.00501723		0	0
78.4314	0.120053	0.121735	0.124045	0.120802	0.0630216	0.0396375	0.0564974	0.0515813	0.00537687	0.00571264	0.00538233	0.00532358		0	0
78.8235	0.127803	0.130511	0.13134	0.127324	0.0670895	0.0424948	0.05982	0.0543662	0.00572389	0.00612442	0.00569885	0.00561099		0	0
79.2157	0.13503	0.138744	0.138042	0.133303	0.0708833	0.0451756	0.0628726	0.0569193	0.00604754	0.00651076	0.00598966	0.00587448		0	0
79.6078	0.141593	0.146258	0.14402	0.138633	0.0743288	0.0476221	0.0655955	0.0591949	0.00634148	0.00686336	0.00624906	0.00610933		0	0
80	0.14736	0.152884	0.149154	0.143214	0.0773559	0.0497797	0.0679335	0.0611509	0.00659974	0.0071743	0.0064718	0.00631121		0	0
80.3922	0.152209	0.158469	0.153335	0.14696	0.0799014	0.051598	0.069838	0.0627504	0.0068169	0.00743636	0.00665323	0.00647628		0	0
80.7843	0.156036	0.162878	0.156476	0.149798	0.0819103	0.0530337	0.0712684	0.0639623	0.00698829	0.00764327	0.0067895	0.00660135		0	0
81.1765	0.158757	0.166004	0.158508	0.151673	0.0833386	0.0540515	0.0721938	0.0647628	0.00711015	0.00778996	0.00687766	0.00668397		0	0
81.5686	0.160311	0.16777	0.159386	0.152547	0.0841547	0.0546264	0.072594	0.0651361	0.00717977	0.00787281	0.00691578	0.0067225		0	0
81.9608	0.160664	0.16813	0.159092	0.152403	0.08434	0.0547437	0.07246	0.0650747	0.00719558	0.00788972	0.00690301	0.00671616		0	0
82.3529	0.159808	0.167076	0.157632	0.151244	0.0838905	0.0544006	0.0717949	0.0645798	0.00715723	0.00784027	0.00683965	0.00666508		0	0
82.7451	0.157762	0.164635	0.155037	0.149093	0.0828163	0.0536058	0.0706133	0.0636613	0.00706558	0.00772572	0.00672709	0.00657029		0	0
83.1373	0.154571	0.160867	0.151366	0.145992	0.0811414	0.0523789	0.0689409	0.0623373	0.00692269	0.0075489	0.00656776	0.00643365		0	0
83.5294	0.150307	0.155866	0.146695	0.142003	0.0789029	0.0507504	0.0668136	0.0606339	0.00673171	0.0073142	0.0063651	0.00625784		0	0
83.9216	0.145062	0.149752	0.141124	0.137202	0.0761495	0.0487596	0.0642762	0.0585837	0.0064968	0.00702729	0.00612338	0.00604625		0	0
84.3137	0.138947	0.142669	0.134767	0.131679	0.0729399	0.0464535	0.0613809	0.0562254	0.00622297	0.00669493	0.00584755	0.00580286		0	0
84.7059	0.132091	0.13478	0.127751	0.125535	0.0693405	0.0438849	0.0581854	0.0536022	0.00591588	0.00632474	0.00554312	0.00553213		0	0
85.098	0.124629	0.126258	0.12021	0.11888	0.0654233	0.0411102	0.054751	0.0507607	0.00558168	0.00592484	0.00521594	0.00523885		0	0
85.4902	0.116704	0.117282	0.112284	0.111827	0.0612635	0.0381875	0.0511408	0.0477492	0.00522677	0.00550362	0.00487201	0.00492805		0	0
85.8824	0.108463	0.108029	0.10411	0.104491	0.056937	0.0351747	0.0474178	0.0446168	0.00485766	0.00506941	0.00451733	0.00460477		0	0
86.2745	0.100045	0.0986709	0.0958212	0.0969857	0.0525184	0.0321276	0.0436427	0.0414119	0.00448067	0.00463026	0.00415769	0.004274		0	0
86.6667	0.0915877	0.0893663	0.0875447	0.0894189	0.0480786	0.029098	0.0398731	0.038181	0.00410189	0.00419363	0.00379857	0.00394054		0	0
87.0588	0.0832149	0.0802596	0.0793955	0.0818926	0.0436833	0.0261328	0.0361614	0.0349673	0.0037269	0.00376628	0.00344497	0.00360887		0	0
87.451	0.0750393	0.0714755	0.0714758	0.0744997	0.0393916	0.0232727	0.0325543	0.0318106	0.00336075	0.00335408	0.00310134	0.00328308		0	0
87.8431	0.0671585	0.0631184	0.0638733	0.0673222	0.0352546	0.0205515	0.0290917	0.0287459	0.00300779	0.00296191	0.00277147	0.00296678		0	0
88.2353	0.0596535	0.0552703	0.0566602	0.0604306	0.0313149	0.0179962	0.0258064	0.0258033	0.00267167	0.00259363	0.00245849	0.00266308		0	0
88.6275	0.052589	0.0479916	0.0498923	0.0538827	0.0276064	0.0156262	0.0227239	0.0230074	0.00235528	0.00225207	0.00216483	0.00237452		0	0
89.0196	0.0460128	0.0413216	0.0436101	0.0477239	0.0241542	0.0134545	0.0198626	0.0203776	0.00206075	0.00193907	0.00189225	0.00210312		0	0
89.4118	0.0399563	0.0352798	0.0378389	0.0419872	0.0209749	0.0114872	0.0172341	0.0179281	0.0017895	0.00165555	0.00164183	0.00185031		0	0
89.8039	0.0344362	0.0298685	0.0325902	0.0366938	0.0180771	0.00972529	0.0148435	0.0156679	0.00154228	0.00140162	0.00141409	0.00161704		0	0
90.1961	0.0294557	0.0250749	0.0278633	0.0318539	0.0154627	0.00816446	0.0126906	0.0136013	0.00131922	0.00117667	0.00120899	0.00140375		0	0
90.5882	0.0250062	0.0208738	0.023647	0.0274679	0.0131269	0.00679657	0.0107703	0.0117285	0.00111994	0.000979529	0.00102604	0.00121047		0	0
90.9804	0.0210692	0.0172306	0.0199213	0.0235279	0.0110602	0.00561036	0.00907333	0.0100462	0.000943617	0.00080857	0.000864385	0.00103684		0	0
91.3725	0.0176187	0.0141039	0.0166592	0.0200187	0.00924888	0.00459228	0.00758762	0.0085478	0.00078908	0.000661844	0.000722846	0.000882192		0	0
91.7647	0.0146226	0.0114476	0.013829	0.0169193	0.00767606	0.00372739	0.00629856	0.00722438	0.000654893	0.000537195	0.000600042	0.000745607		0	0
92.1569	0.0120447	0.0092136	0.0113953	0.0142044	0.00632282	0.00299998	0.00519009	0.00606515	0.00053944	0.00043236	0.000494442	0.000625966		0	0
92.549	0.00984675	0.00735327	0.00932086	0.0118456	0.00516901	0.00239425	0.00424528	0.00505797	0.000441001	0.000345062	0.000404433	0.000522018		0	0
92.9412	0.00798939	0.00581929	0.00756806	0.00981269	0.004194	0.00189478	0.00344695	0.00418992	0.000357816	0.000273078	0.000328379	0.000432429		0	0
93.3333	0.00643365	0.00456664	0.00609973	0.00807443	0.00337732	0.00148691	0.00277818	0.0034477	0.000288141	0.000214295	0.000264668	0.000355827		0	0
93.7255	0.00514192	0.00355354	0.00488017	0.00659978	0.00269923	0.00115705	0.00222272	0.00281804	0.000230288	0.000166755	0.000211751	0.000290842		0	0
94.1176	0.00407865	0.00274198	0.00387575	0.00535848	0.00214107	0.000892797	0.00176525	0.00228802	0.000182669	0.000128671	0.000168169	0.000236139		0	0
94.5098	0.00321094	0.00209799	0.00305545	0.00432163	0.00168557	0.000683114	0.00139163	0.0018453	0.000143807	9.8451e-05	0.000132576	0.000190447		0	0
94.902	0.00250883	0.00159178	0.00239106	0.00346217	0.001317	0.000518288	0.00108903	0.00147831	0.000112362	7.46962e-05	0.000103748	0.000152572		0	0
95.2941	0.00194551	0.00119756	0.0018574	0.00275514	0.00102129	0.00038993	0.000845969	0.00117642	8.71327e-05	5.61971e-05	8.05926e-05	0.000121414		0	0
95.6863	0.00149734	0.000893411	0.00143224	0.00217787	0.000786023	0.000290898	0.000652328	0.00092993	6.70606e-05	4.19245e-05	6.2145e-05	9.59753e-05		0	0
96.0784	0.00114375	0.00066091	0.00109629	0.00171008	0.000600407	0.000215195	0.000499315	0.000730186	5.12245e-05	3.10141e-05	4.7568e-05	7.53603e-05		0	0
96.4706	0.000867092	0.00048481	0.000832973	0.00133381	0.000455177	0.000157856	0.000379386	0.000569523	3.8834e-05	2.27503e-05	3.61428e-05	5.87788e-05		0	0
96.8627	0.000652414	0.000352646	0.000628254	0.00103339	0.000342482	0.000114823	0.000286144	0.000441248	2.92193e-05	1.65483e-05	2.726e-05	4.55399e-05		0	0
97.2549	0.000487197	0.000254357	0.000470367	0.000795301	0.000255752	8.28193e-05	0.000214233	0.000339586	2.18198e-05	1.1936e-05	2.04092e-05	3.50476e-05		0	0
97.6471	0.000361085	0.000181922	0.000349571	0.000607984	0.00018955	5.92344e-05	0.000159216	0.000259603	1.61717e-05	8.53692e-06	1.51679e-05	2.67928e-05		0	0
98.0392	0.000265607	0.000129022	0.000257888	0.000461686	0.000139429	4.20101e-05	0.000117458	0.000197135	1.18956e-05	6.05454e-06	1.11898e-05	2.03457e-05		0	0
98.4314	0.000193906	9.07367e-05	0.000188854	0.000348253	0.00010179	2.95442e-05	8.60153e-05	0.000148701	8.68438e-06	4.25794e-06	8.19439e-06	1.5347e-05		0	0
98.8235	0.000140497	6.32759e-05	0.000137283	0.000260939	7.37536e-05	2.06029e-05	6.2527e-05	0.000111418	6.29239e-06	2.9693e-06	5.95673e-06	1.14991e-05		0	0
99.2157	0.000101034	4.37554e-05	9.90619e-05	0.000194212	5.30375e-05	1.42469e-05	4.51187e-05	8.29265e-05	4.52497e-06	2.05328e-06	4.2983e-06	8.5586e-06		0	0
99.6078	7.21095e-05	3.00029e-05	7.09567e-05	0.000143584	3.78536e-05	9.76904e-06	3.23179e-05	6.13091e-05	3.22953e-06	1.40792e-06	3.07882e-06	6.32753e-06		0	0
100	5.10788e-05	2.04001e-05	5.04519e-05	0.000105447	2.68136e-05	6.64233e-06	2.29788e-05	4.50247e-05	2.28764e-06	9.573e-07	2.18911e-06	4.64687e-06		0	0
	3.59097e-05	1.37543e-05	3.56089e-05	7.69225e-05	1.88507e-05	4.47844e-06	1.62184e-05	3.28451e-05	1.60827e-06	6.45438e-07	1.54507e-06	3.38985e-06
	2.50558e-05	9.19566e-06	2.49481e-05	5.57401e-05	1.31529e-05	2.99414e-06	1.13629e-05	2.38005e-05	1.12216e-06	4.31518e-07	1.0825e-06	2.45637e-06
	1.73511e-05	6.09628e-06	1.73506e-05	4.01214e-05	9.10838e-06	1.98497e-06	7.90251e-06	1.71315e-05	7.77094e-07	2.86076e-07	7.52844e-07	1.76809e-06
	1.19253e-05	4.0076e-06	1.19781e-05	2.86866e-05	6.26014e-06	1.30489e-06	5.45556e-06	1.22489e-05	5.34092e-07	1.88062e-07	5.19732e-07	1.26417e-06
	8.13459e-06	2.61242e-06	8.20844e-06	2.0374e-05	4.27022e-06	8.50611e-07	3.73862e-06	8.6995e-06	3.6432e-07	1.22591e-07	3.56165e-07	8.97849e-07
	5.50714e-06	1.68864e-06	5.5838e-06	1.43737e-05	2.89095e-06	5.49827e-07	2.5432e-06	6.13742e-06	2.46645e-07	7.92417e-08	2.42282e-07	6.33424e-07
	3.70033e-06	1.08236e-06	3.77048e-06	1.00729e-05	1.94247e-06	3.52419e-07	1.7173e-06	4.30102e-06	1.65725e-07	5.0791e-08	1.63602e-07	4.43895e-07
	2.46762e-06	6.87926e-07	2.52733e-06	7.01186e-06	1.29537e-06	2.23991e-07	1.1511e-06	2.994e-06	1.10516e-07	3.22818e-08	1.09661e-07	3.09001e-07
	1.6332e-06	4.33561e-07	1.6816e-06	4.8485e-06	8.57342e-07	1.41169e-07	7.65902e-07	2.07026e-06	7.31453e-08	2.03454e-08	7.29648e-08	2.13665e-07
	1.07281e-06	2.70955e-07	1.11066e-06	3.33024e-06	5.6317e-07	8.82238e-08	5.05863e-07	1.42198e-06	4.80476e-08	1.27149e-08	4.81918e-08	1.46758e-07
	6.99413e-07	1.67912e-07	7.28181e-07	2.27216e-06	3.67154e-07	5.46726e-08	3.31657e-07	9.70189e-07	3.13242e-08	7.87947e-09	3.15958e-08	1.0013e-07
	4.5255e-07	1.03182e-07	4.73908e-07	1.53991e-06	2.37564e-07	3.35963e-08	2.15846e-07	6.57526e-07	2.02681e-08	4.84193e-09	2.05629e-08	6.78613e-08
	2.90618e-07	6.28728e-08	3.06158e-07	1.03668e-06	1.52559e-07	2.04716e-08	1.39443e-07	4.42654e-07	1.30158e-08	2.95038e-09	1.32842e-08	4.5685e-08
	1.85226e-07	3.79892e-08	1.96334e-07	6.93253e-07	9.72339e-08	1.23694e-08	8.94222e-08	2.96012e-07	8.29564e-09	1.78269e-09	8.51895e-09	3.05505e-08
	1.17167e-07	2.27612e-08	1.24981e-07	4.60502e-07	6.15066e-08	7.41112e-09	5.69236e-08	1.9663e-07	5.24752e-09	1.0681e-09	5.42292e-09	2.02936e-08
	7.35588e-08	1.35228e-08	7.89745e-08	3.03854e-07	3.86144e-08	4.40308e-09	3.59697e-08	1.29743e-07	3.29444e-09	6.34577e-10	3.42671e-09	1.33904e-08
	4.58338e-08	7.96671e-09	4.95369e-08	1.99156e-07	2.40603e-08	2.59399e-09	2.25621e-08	8.50377e-08	2.05274e-09	3.73848e-10	2.14941e-09	8.77648e-09
	2.8344e-08	4.65401e-09	3.08439e-08	1.29663e-07	1.48791e-08	1.51536e-09	1.40481e-08	5.53648e-08	1.26943e-09	2.18395e-10	1.33832e-09	5.71404e-09
	1.73964e-08	2.69596e-09	1.90636e-08	8.38557e-08	9.13219e-09	8.77814e-10	8.68272e-09	3.58056e-08	7.79125e-10	1.26511e-10	8.27173e-10	3.69538e-09
	1.0597e-08	1.54859e-09	1.16961e-08	5.38696e-08	5.56286e-09	5.04227e-10	5.3271e-09	2.30018e-08	4.74603e-10	7.26697e-11	5.07494e-10	2.37394e-09
	6.40663e-09	8.82062e-10	7.12316e-09	3.43755e-08	3.36313e-09	2.87202e-10	3.24431e-09	1.4678e-08	2.8693e-10	4.13919e-11	3.09075e-10	1.51487e-09
	3.84415e-09	4.98194e-10	4.30628e-09	2.17895e-08	2.01797e-09	1.62214e-10	1.96134e-09	9.30392e-09	1.72166e-10	2.33784e-11	1.8685e-10	9.60229e-10
	2.28925e-09	2.7902e-10	2.58422e-09	1.37196e-08	1.20173e-09	9.085e-11	1.17701e-09	5.85814e-09	1.02528e-10	1.30934e-11	1.1213e-10	6.04601e-10
	1.35304e-09	1.54957e-10	1.53941e-09	8.58084e-09	7.10274e-10	5.04545e-11	7.0114e-10	3.66393e-09	6.0598e-11	7.27155e-12	6.67952e-11	3.78143e-10
	7.93694e-10	8.53343e-11	9.10284e-10	5.33104e-09	4.16646e-10	2.77851e-11	4.14598e-10	2.2763e-09	3.55467e-11	4.00442e-12	3.94973e-11	2.3493e-10
	4.62081e-10	4.65988e-11	5.34314e-10	3.28994e-09	2.42568e-10	1.51727e-11	2.43359e-10	1.40477e-09	2.0695e-11	2.18671e-12	2.31839e-11	1.44982e-10
	2.66997e-10	2.52326e-11	3.11325e-10	2.01678e-09	1.40159e-10	8.21583e-12	1.41796e-10	8.61146e-10	1.19579e-11	1.18407e-12	1.35084e-11	8.88763e-11
	1.53116e-10	1.35484e-11	1.80065e-10	1.22807e-09	8.03775e-11	4.41141e-12	8.20123e-11	5.24375e-10	6.85751e-12	6.35777e-13	7.81303e-12	5.41191e-11
	8.71477e-11	7.21361e-12	1.03381e-10	7.42819e-10	4.57479e-11	2.34877e-12	4.7086e-11	3.17176e-10	3.90304e-12	3.38508e-13	4.48572e-12	3.27348e-11
	4.92285e-11	3.8085e-12	5.89185e-11	4.4631e-10	2.58423e-11	1.24006e-12	2.6835e-11	1.9057e-10	2.20477e-12	1.78719e-13	2.55648e-12	1.96681e-11
	2.75994e-11	1.99385e-12	3.33318e-11	2.66369e-10	1.44882e-11	6.49206e-13	1.51813e-11	1.13737e-10	1.23608e-12	9.35642e-14	1.44627e-12	1.17385e-11
	1.53571e-11	1.03507e-12	1.87182e-11	1.57916e-10	8.06162e-12	3.37023e-13	8.52538e-12	6.74286e-11	6.87788e-13	4.85721e-14	8.12184e-13	6.9591e-12
	8.48085e-12	5.32826e-13	1.04344e-11	9.29956e-11	4.45199e-12	1.7349e-13	4.75244e-12	3.97082e-11	3.79827e-13	2.50035e-14	4.52748e-13	4.09816e-12
	4.6483e-12	2.71981e-13	5.77386e-12	5.43992e-11	2.44011e-12	8.85578e-14	2.62976e-12	2.32279e-11	2.08181e-13	1.2763e-14	2.50528e-13	2.39729e-12
	2.52856e-12	1.37667e-13	3.17149e-12	3.16095e-11	1.32736e-12	4.48247e-14	1.44449e-12	1.34969e-11	1.13245e-13	6.46018e-15	1.37611e-13	1.39298e-12
	1.36514e-12	6.90966e-14	1.72926e-12	1.82447e-11	7.16623e-13	2.24981e-14	7.87606e-13	7.7903e-12	6.11397e-14	3.24244e-15	7.50325e-14	8.04013e-13
	7.3148e-13	3.43892e-14	9.35948e-13	1.04604e-11	3.83987e-13	1.11972e-14	4.26287e-13	4.4665e-12	3.27604e-14	1.61376e-15	4.06109e-14	4.60974e-13
	3.89003e-13	1.69717e-14	5.02854e-13	5.9574e-12	2.04205e-13	5.52605e-15	2.2903e-13	2.54375e-12	1.74221e-14	7.9642e-16	2.18189e-14	2.62533e-13
	2.05318e-13	8.30553e-15	2.68182e-13	3.37022e-12	1.07781e-13	2.70431e-15	1.22146e-13	1.43905e-12	9.19546e-15	3.89748e-16	1.16364e-14	1.4852e-13
	1.07553e-13	4.03039e-15	1.41976e-13	1.89389e-12	5.64597e-14	1.31231e-15	6.46643e-14	8.08672e-13	4.81694e-15	1.89131e-16	6.16035e-15	8.34606e-14
	5.59172e-14	1.93938e-15	7.46101e-14	1.05717e-12	2.93535e-14	6.31469e-16	3.39819e-14	4.51401e-13	2.50433e-15	9.1008e-17	3.23734e-15	4.65878e-14
	2.8853e-14	9.25376e-16	3.89205e-14	5.86178e-13	1.51463e-14	3.01305e-16	1.77267e-14	2.50292e-13	1.29222e-15	4.34244e-17	1.68876e-15	2.58319e-14
	1.47761e-14	4.37835e-16	2.01537e-14	3.22855e-13	7.75665e-15	1.42561e-16	9.17922e-15	1.37856e-13	6.61769e-16	2.0546e-17	8.74472e-16	1.42277e-14
	7.51021e-15	2.05419e-16	1.03593e-14	1.76637e-13	3.94245e-15	6.68851e-17	4.71825e-15	7.54221e-14	3.36356e-16	9.63955e-18	4.49491e-16	7.78409e-15
	3.78851e-15	9.55672e-17	5.28572e-15	9.59949e-14	1.98876e-15	3.1117e-17	2.40743e-15	4.09889e-14	1.69674e-16	4.48461e-18	2.29348e-16	4.23034e-15
	1.89674e-15	4.40874e-17	2.67716e-15	5.18215e-14	9.95688e-16	1.4355e-17	1.21934e-15	2.21273e-14	8.49485e-17	2.06886e-18	1.16162e-16	2.28369e-15
	9.42481e-16	2.01678e-17	1.34599e-15	2.77885e-14	4.94751e-16	6.56669e-18	6.13045e-16	1.18654e-14	4.22104e-17	9.46398e-19	5.84027e-17	1.22459e-15
	4.64793e-16	9.14827e-18	6.7175e-16	1.48018e-14	2.43991e-16	2.97871e-18	3.05955e-16	6.32023e-15	2.08165e-17	4.29294e-19	2.91473e-17	6.52292e-16
	2.27495e-16	4.11489e-18	3.3279e-16	7.83176e-15	1.19422e-16	1.33982e-18	1.51573e-16	3.34409e-15	1.01887e-17	1.93096e-19	1.44398e-17	3.45133e-16
	1.10511e-16	1.83533e-18	1.63656e-16	4.11622e-15	5.80124e-17	5.9759e-19	7.45386e-17	1.75758e-15	4.94941e-18	8.61253e-20	7.10103e-18	1.81395e-16
	5.32801e-17	8.11726e-19	7.98894e-17	2.14897e-15	2.79692e-17	2.64301e-19	3.63864e-17	9.1759e-16	2.38623e-18	3.80913e-20	3.46641e-18	9.47017e-17
	2.54946e-17	3.55993e-19	3.87119e-17	1.11444e-15	1.33833e-17	1.15913e-19	1.76317e-17	4.75856e-16	1.14181e-18	1.67054e-20	1.67971e-18	4.91117e-17
	1.21075e-17	1.54814e-19	1.86208e-17	5.74089e-16	6.35578e-18	5.04081e-20	8.48101e-18	2.4513e-16	5.42252e-19	7.26487e-21	8.07957e-19	2.52991e-17
	5.70669e-18	6.67605e-20	8.89095e-18	2.93761e-16	2.9957e-18	2.17374e-20	4.04947e-18	1.25433e-16	2.55583e-19	3.13282e-21	3.85779e-19	1.29456e-17
	2.66955e-18	2.85473e-20	4.21402e-18	1.49315e-16	1.40137e-18	9.29509e-21	1.91932e-18	6.37561e-17	1.1956e-19	1.33962e-21	1.82847e-19	6.58008e-18
	1.23941e-18	1.21045e-20	1.98263e-18	7.5389e-17	6.50624e-19	3.94128e-21	9.03009e-19	3.21904e-17	5.55089e-20	5.68021e-22	8.60266e-20	3.32227e-18
	5.71106e-19	5.08943e-21	9.25945e-19	3.781e-17	2.998e-19	1.65714e-21	4.21731e-19	1.61445e-17	2.55778e-20	2.38828e-22	4.01768e-20	1.66622e-18
	2.61181e-19	2.12192e-21	4.29266e-19	1.88364e-17	1.37106e-19	6.90902e-22	1.95513e-19	8.04298e-18	1.16974e-20	9.95736e-23	1.86259e-20	8.30091e-19
	1.18547e-19	8.77252e-22	1.97544e-19	9.3215e-18	6.22308e-20	2.85636e-22	8.99734e-20	3.98019e-18	5.30931e-21	4.11662e-23	8.57146e-21	4.10783e-19
	5.34027e-20	3.59632e-22	9.02402e-20	4.58212e-18	2.80335e-20	1.17098e-22	4.11008e-20	1.95652e-18	2.39172e-21	1.68762e-23	3.91553e-21	2.01927e-19
	2.38759e-20	1.46194e-22	4.09198e-20	2.23739e-18	1.25336e-20	4.76014e-23	1.86373e-20	9.55344e-19	1.06932e-21	6.86036e-24	1.77551e-21	9.85982e-20
	1.05945e-20	5.89306e-23	1.84189e-20	1.0852e-18	5.56153e-21	1.9188e-23	8.38908e-21	4.63371e-19	4.7449e-22	2.76539e-24	7.99198e-22	4.78232e-20
	4.66577e-21	2.35553e-23	8.22986e-21	5.22848e-19	2.44928e-21	7.66968e-24	3.74837e-21	2.23251e-19	2.08963e-22	1.10536e-24	3.57094e-22	2.3041e-20
	2.03935e-21	9.33628e-24	3.65022e-21	2.50226e-19	1.07055e-21	3.03992e-24	1.66253e-21	1.06844e-19	9.13351e-23	4.38117e-25	1.58383e-22	1.10271e-20
	8.84672e-22	3.66941e-24	1.6071e-21	1.18956e-19	4.64405e-22	1.19477e-24	7.31968e-22	5.07929e-20	3.96213e-23	1.72192e-25	6.9732e-23	5.24218e-21
	3.80888e-22	1.43007e-24	7.02365e-22	5.61736e-20	1.99946e-22	4.65636e-25	3.19899e-22	2.39856e-20	1.70586e-23	6.71079e-26	3.04757e-23	2.47548e-21
	1.62756e-22	5.52658e-25	3.04706e-22	2.63495e-20	8.54379e-23	1.79947e-25	1.38781e-22	1.1251e-20	7.28925e-24	2.59342e-26	1.32212e-23	1.16118e-21
	6.90238e-23	2.11784e-25	1.31219e-22	1.22774e-20	3.62338e-23	6.89575e-26	5.9765e-23	5.24234e-21	3.09133e-24	9.93822e-27	5.69361e-24	5.41046e-22
	2.90526e-23	8.04761e-26	5.60933e-23	5.68247e-21	1.5251e-23	2.62033e-26	2.55482e-23	2.42636e-21	1.30116e-24	3.77644e-27	2.43389e-24	2.50417e-22
	1.21365e-23	3.03235e-26	2.38025e-23	2.61253e-21	6.37103e-24	9.87342e-27	1.08411e-23	1.11552e-21	5.43553e-25	1.42297e-27	1.03279e-24	1.1513e-22
	5.03186e-24	1.133e-26	1.00261e-23	1.1931e-21	2.64146e-24	3.68907e-27	4.56647e-24	5.09443e-22	2.25359e-25	5.31673e-28	4.35032e-25	5.25781e-23
	2.07055e-24	4.19774e-27	4.19215e-24	5.4124e-22	1.08693e-24	1.3668e-27	1.90935e-24	2.31104e-22	9.27327e-26	1.96984e-28	1.81898e-25	2.38516e-23
	8.45605e-25	1.5422e-27	1.73996e-24	2.43891e-22	4.43897e-25	5.02146e-28	7.92483e-25	1.04139e-22	3.78717e-26	7.23697e-29	7.54971e-26	1.07479e-23
	3.42746e-25	5.61829e-28	7.16871e-25	1.09168e-22	1.79923e-25	1.82933e-28	3.26506e-25	4.66138e-23	1.53504e-26	2.63645e-29	3.11051e-26	4.81087e-24
	1.3788e-25	2.02957e-28	2.93184e-25	4.85391e-23	7.23795e-26	6.60835e-29	1.33533e-25	2.07257e-23	6.17516e-27	9.52403e-30	1.27213e-26	2.13904e-24
	5.50495e-26	7.27014e-29	1.19024e-25	2.14378e-23	2.8898e-26	2.36718e-29	5.42108e-26	9.15374e-24	2.46547e-27	3.41161e-30	5.16448e-27	9.4473e-25
	2.18137e-26	2.58237e-29	4.79656e-26	9.40512e-24	1.1451e-26	8.4083e-30	2.18464e-26	4.01589e-24	9.7696e-28	1.21181e-30	2.08123e-27	4.14468e-25
	8.57886e-27	9.09564e-30	1.91876e-26	4.09866e-24	4.50344e-27	2.96157e-30	8.73919e-27	1.75009e-24	3.84217e-28	4.26824e-31	8.32552e-28	1.80621e-25
	3.34853e-27	3.17676e-30	7.61921e-27	1.77424e-24	1.75779e-27	1.03436e-30	3.47024e-27	7.57585e-25	1.49969e-28	1.49074e-31	3.30598e-28	7.8188e-26
	1.29718e-27	1.10021e-30	3.00328e-27	7.62921e-25	6.80951e-28	3.58231e-31	1.36787e-27	3.2576e-25	5.80962e-29	5.16286e-32	1.30313e-28	3.36207e-26
	4.98738e-28	3.77835e-31	1.17511e-27	3.25867e-25	2.6181e-28	1.23024e-31	5.35217e-28	1.39142e-25	2.23367e-29	1.77304e-32	5.09883e-29	1.43604e-26
	1.90312e-28	1.28667e-31	4.56417e-28	1.38259e-25	9.99038e-29	4.18943e-32	2.07879e-28	5.90353e-26	8.52342e-30	6.03786e-33	1.9804e-29	6.09286e-27
	7.20752e-29	4.3448e-32	1.75971e-28	5.82697e-26	3.78356e-29	1.41468e-32	8.01476e-29	2.48806e-26	3.22799e-30	2.03885e-33	7.63538e-30	2.56785e-27
	2.70912e-29	1.45482e-32	6.73468e-29	2.43942e-26	1.42214e-29	4.73695e-33	3.06737e-29	1.04161e-26	1.21332e-30	6.82694e-34	2.92218e-30	1.07501e-27
	1.01064e-29	4.83046e-33	2.55853e-29	1.01443e-26	5.30529e-30	1.57281e-33	1.16531e-29	4.33153e-27	4.52628e-31	2.26675e-34	1.11015e-30	4.47044e-28
	3.74183e-30	1.59039e-33	9.64856e-30	4.19039e-27	1.96426e-30	5.17837e-34	4.39453e-30	1.78926e-27	1.67584e-31	7.46312e-35	4.18652e-31	1.84664e-28
	1.37499e-30	5.19228e-34	3.61186e-30	1.71942e-27	7.21793e-31	1.69062e-34	1.64506e-30	7.34173e-28	6.15808e-32	2.43654e-35	1.56719e-31	7.57718e-29
	5.01459e-31	1.68093e-34	1.34214e-30	7.00811e-28	2.63239e-31	5.47316e-35	6.11291e-31	2.99239e-28	2.24586e-32	7.88798e-36	5.82356e-32	3.08836e-29
	1.81508e-31	5.39609e-35	4.95065e-31	2.83736e-28	9.52821e-32	1.75698e-35	2.25482e-31	1.21153e-28	8.12912e-33	2.53218e-36	2.14809e-32	1.25038e-29
	6.52051e-32	1.71769e-35	1.81269e-31	1.1411e-28	3.42292e-32	5.59287e-36	8.25607e-32	4.87238e-29	2.92031e-33	8.0605e-37	7.86528e-33	5.02864e-30
	2.32483e-32	5.42189e-36	6.58844e-32	4.55855e-29	1.22041e-32	1.76539e-36	3.00077e-32	1.94645e-29	1.04121e-33	2.54429e-37	2.85873e-33	2.00888e-30
	8.22665e-33	1.69704e-36	2.37706e-32	1.80894e-29	4.31855e-33	5.52563e-37	1.08265e-32	7.72398e-30	3.68443e-34	7.9636e-38	1.03141e-33	7.97169e-31
	2.88921e-33	5.26713e-37	8.51321e-33	7.13041e-30	1.51668e-33	1.71499e-37	3.87743e-33	3.04462e-30	1.29397e-34	2.47167e-38	3.69389e-34	3.14226e-31
	1.00707e-33	1.62103e-37	3.02653e-33	2.7919e-30	5.28657e-34	5.27814e-38	1.37846e-33	1.19211e-30	4.5103e-35	7.6069e-39	1.31321e-34	1.23035e-31
	3.48387e-34	4.94707e-38	1.06806e-33	1.08588e-30	1.82885e-34	1.61078e-38	4.86457e-34	4.63658e-31	1.5603e-35	2.32147e-39	4.63431e-35	4.78528e-32
	1.19616e-34	1.49707e-38	3.74146e-34	4.19522e-31	6.2792e-35	4.8745e-39	1.70408e-34	1.79132e-31	5.35719e-36	7.02517e-40	1.62342e-35	1.84876e-32
	4.07607e-35	4.49234e-39	1.30102e-34	1.60999e-31	2.13971e-35	1.46272e-39	5.92564e-35	6.87449e-32	1.82553e-36	2.10809e-40	5.64515e-36	7.09495e-33
	1.37853e-35	1.33672e-39	4.49084e-35	6.13741e-32	7.23654e-36	4.35242e-40	2.0454e-35	2.62061e-32	6.17395e-37	6.27277e-41	1.94858e-36	2.70466e-33
	4.62716e-36	3.94411e-40	1.53874e-35	2.32403e-32	2.42901e-36	1.28422e-40	7.00836e-36	9.92338e-33	2.07234e-37	1.85084e-41	6.67663e-37	1.02416e-33
	1.54148e-36	1.15397e-40	5.23364e-36	8.74164e-33	8.09192e-37	3.7573e-41	2.38371e-36	3.73259e-33	6.90373e-38	5.41462e-42	2.27088e-37	3.8523e-34
	5.09663e-37	3.34798e-41	1.76701e-36	3.26617e-33	2.67546e-37	1.09007e-41	8.048e-37	1.39462e-33	2.2826e-38	1.57086e-42	7.66705e-38	1.43935e-34
	1.67245e-37	9.63112e-42	5.92202e-37	1.21221e-33	8.77946e-38	3.13611e-42	2.69724e-37	5.17602e-34	7.49031e-39	4.52619e-43	2.56957e-38	5.34201e-35
	5.44687e-38	2.74795e-42	1.97015e-37	4.46901e-34	2.85931e-38	8.94028e-43	8.97324e-38	1.90822e-34	2.43946e-39	1.28919e-43	8.5485e-39	1.96942e-35
	1.76061e-38	7.77721e-43	6.50618e-38	1.63659e-34	9.24227e-39	2.53635e-43	2.9633e-38	6.98808e-35	7.88516e-40	3.64338e-44	2.82304e-39	7.21218e-36
	5.64814e-39	2.18603e-43	2.1328e-38	5.95336e-35	2.96497e-39	7.14662e-44	9.71406e-39	2.54203e-35	2.5296e-40	9.80909e-45	9.25425e-40	2.62355e-36
	1.79833e-39	6.02558e-44	6.94021e-39	2.15119e-35	9.44028e-40	1.96182e-44	3.16099e-39	9.18537e-36	8.0541e-41	2.8026e-45	3.01136e-40	9.47994e-37
	5.68276e-40	1.68156e-44	2.24178e-39	7.72129e-36	2.98314e-40	5.60519e-45	1.02104e-39	3.29691e-36	2.54504e-41	1.4013e-45	9.72711e-41	3.40264e-37
	1.78226e-40	4.2039e-45	7.18802e-40	2.75293e-36	9.35591e-41	1.4013e-45	3.27385e-40	1.17547e-36	7.9818e-42	0	3.11887e-41	1.21317e-37
	5.5476e-41	1.4013e-45	2.28783e-40	9.74976e-37	2.91218e-41	0	1.04202e-40	4.16305e-37	2.4845e-42	0	9.9268e-42	4.29656e-38
	1.71379e-41	0	7.22832e-41	3.42995e-37	8.99634e-42	0	3.29221e-41	1.46455e-37	7.67912e-43	0	3.13611e-42	1.51152e-38
	5.25487e-42	0	2.26702e-41	1.1986e-37	2.75776e-42	0	1.03248e-41	5.11792e-38	2.35418e-43	0	9.83712e-43	5.28205e-39
	1.59888e-42	0	7.05694e-42	4.16062e-38	8.39378e-43	0	3.21458e-42	1.77654e-38	7.14662e-44	0	3.06884e-43	1.83351e-39
	4.83448e-43	0	2.18042e-42	1.43461e-38	2.53635e-43	0	9.93521e-43	6.12564e-39	2.10195e-44	0	9.52883e-44	6.3221e-40
	1.44334e-43	0	6.68419e-43	4.91365e-39	7.56701e-44	0	3.04082e-43	2.09808e-39	7.00649e-45	0	2.94273e-44	2.16537e-40
	4.34403e-44	0	2.03188e-43	1.67174e-39	2.24208e-44	0	9.24857e-44	7.13817e-40	1.4013e-45	0	8.40779e-45	7.36705e-41
	1.26117e-44	0	6.16571e-44	5.64974e-40	7.00649e-45	0	2.8026e-44	2.41238e-40	0	0	2.8026e-45	2.48969e-41
	4.2039e-45	0	1.82169e-44	1.89663e-40	1.4013e-45	0	8.40779e-45	8.09838e-41	0	0	1.4013e-45	8.35875e-42
	1.4013e-45	0	5.60519e-45	6.32448e-41	0	0	2.8026e-45	2.70058e-41	0	0	0	2.78718e-42
	0	0	1.4013e-45	2.09494e-41	0	0	1.4013e-45	8.94449e-42	0	0	0	9.23456e-43
	0	0	0	6.89299e-42	0	0	0	2.94273e-42	0	0	0	3.04082e-43
	0	0	0	2.25329e-42	0	0	0	9.61291e-43	0	0	0	9.94922e-44
	0	0	0	7.31478e-43	0	0	0	3.1249e-43	0	0	0	3.22299e-44
	0	0	0	2.35418e-43	0	0	0	1.00893e-43	0	0	0	9.80909e-45
	0	0	0	7.56701e-44	0	0	0	3.22299e-44	0	0	0	2.8026e-45
	0	0	0	2.38221e-44	0	0	0	9.80909e-45	0	0	0	1.4013e-45
	0	0	0	7.00649e-45	0	0	0	2.8026e-45	0	0	0	0
	0	0	0	2.8026e-45	0	0	0	1.4013e-45	0	0	0	0
	0	0	0	1.4013e-45	0	0	0	0	0	0	0	0
	0	0	0	0	0	0	0	0	0	0	0	0
	0	0	0	0	0	0	0	0	0	0	0	0
	0	0	0	0	0	0	0	0	0	0	0	0
	0	0	0	0	0	0	0	0	0	0	0	0
	0	0	0	0	0	0	0	0	0	0	0	0
	0	0	0	0	0	0	0	0	0	0	0	0
	0	0	0	0	0	0	0	0	0	0	0	0
	0	0	0	0	0	0	0	0	0	0	0	0
	0	0	0	0	0	0	0	0	0	0	0	0
	0	0	0	0	0	0	0	0	0	0	0	0
	0	0	0	0	0	0	0	0	0	0	0	0
	0	0	0	0	0	0	0	0	0	0	0	0
	0	0	0	0	0	0	0	0	0	0	0	0
	0	0	0	0	0	0	0	0	0	0	0	0
	0	0	0	0	0	0	0	0	0	0	0	0
	0	0	0	0	0	0	0	0	0	0	0	0

## Sheet: Figure2_F
cAMP concentration (uM)	Experiment1	Experiment2	Experiment3	Experiment4
0	0.0646498	0.0692789	0.0818907	0.0725012
0.5	0.303136	0.291498
1	0.701061	0.513113	0.600615	0.576094
2			0.798808	0.791405
321	0.958781	0.959616	0.956917	0.958461
