# Supplementary material for: Domain coupling in allosteric regulation of SthK measured using time-resolved transition metal ion FRET
Source: eLife. 2025 Aug 12;14:RP106892. doi: 10.7554/eLife.106892 (PMC12342821; doi:10.7554/eLife.106892)
Supplement: Figure 3—source data 1. [file elife-106892-fig3-data1.xlsx]

## Sheet: Figure 3 - B
	B - Representative Traces								B- weighted residuals
SthKcterm- S361Acd		SthKcterm- S361Acd + SthKcterm-V416C						Time(s)	+ [Ru(bpy)2phenM]2+	+ [Ru(bpy)2phenM]2+ + 320uM cAMP
Time (s)	+ [Ru(bpy)2phenM]2+	Time (s)	+ [Ru(bpy)2phenM]2+	+ [Ru(bpy)2phenM]2+ + 320uM cAMP				0	-0.905684	-0.813863
0	0.000801068	0	0.0001997	0.000211149				5e-11	1.15852	-0.281531
2.5e-11	0.000801068	5e-11	0.000599101	0.000316723				1e-10	-0.389632	0.250801
5e-11	0	1e-10	0.000299551	0.000422297				1.5e-10	-0.905684	-0.813863
7.5e-11	0.000801068	1.5e-10	0.0001997	0.000211149				2e-10	-0.389632	-0.281531
1e-10	0.000267023	2e-10	0.000299551	0.000316723				2.5e-10	-0.389632	0.250801
1.25e-10	0	2.5e-10	0.000299551	0.000422297				3e-10	-1.42174	0.250801
1.5e-10	0.000267023	3e-10	9.98502e-05	0.000422297				3.5e-10	-0.905684	-0.281531
1.75e-10	0.000267023	3.5e-10	0.0001997	0.000316723				4e-10	-1.93779	-0.813863
2e-10	0.000801068	4e-10	0	0.000211149				4.5e-10	0.642472	-1.3462
2.25e-10	0.000534045	4.5e-10	0.000499251	0.000105574				5e-10	-0.389632	-0.813863
2.5e-10	0	5e-10	0.000299551	0.000211149				5.5e-10	-1.42174	-0.281531
2.75e-10	0	5.5e-10	9.98502e-05	0.000316723				6e-10	-0.389632	0.250801
3e-10	0	6e-10	0.000299551	0.000422297				6.5e-10	-1.42174	1.31546
3.25e-10	0.000534045	6.5e-10	9.98502e-05	0.000633446				7e-10	0.642472	-0.813863
3.5e-10	0.000267023	7e-10	0.000499251	0.000211149				7.5e-10	-0.905684	-0.281531
3.75e-10	0.000534045	7.5e-10	0.0001997	0.000316723				8e-10	-0.389632	-0.281531
4e-10	0	8e-10	0.000299551	0.000316723				8.5e-10	-0.389632	-0.813863
4.25e-10	0.000534045	8.5e-10	0.000299551	0.000211149				9e-10	1.15852	0.250801
4.5e-10	0.000267023	9e-10	0.000599101	0.000422297				9.5e-10	0.642472	-1.3462
4.75e-10	0.000534045	9.5e-10	0.000499251	0.000105574				1e-09	-0.905684	-0.813863
5e-10	0	1e-09	0.0001997	0.000211149				1.05e-09	0.642472	0.783133
5.25e-10	0.000267023	1.05e-09	0.000499251	0.000527872				1.1e-09	-0.905684	0.250801
5.5e-10	0.000534045	1.1e-09	0.0001997	0.000422297				1.15e-09	-0.905684	0.250801
5.75e-10	0.000267023	1.15e-09	0.0001997	0.000422297				1.2e-09	0.12642	-0.813863
6e-10	0.000534045	1.2e-09	0.000399401	0.000211149				1.25e-09	-0.389632	1.8478
6.25e-10	0.000267023	1.25e-09	0.000299551	0.00073902				1.3e-09	1.67458	-1.3462
6.5e-10	0	1.3e-09	0.000698952	0.000105574				1.35e-09	0.642472	0.250801
6.75e-10	0.000267023	1.35e-09	0.000499251	0.000422297				1.4e-09	-0.389632	1.31546
7e-10	0.000801068	1.4e-09	0.000299551	0.000633446				1.45e-09	-0.389632	-0.281531
7.25e-10	0	1.45e-09	0.000299551	0.000316723				1.5e-09	0.642472	0.783133
7.5e-10	0.000267023	1.5e-09	0.000499251	0.000527872				1.55e-09	1.15852	-0.281531
7.75e-10	0.000267023	1.55e-09	0.000599101	0.000316723				1.6e-09	-1.42174	-1.87853
8e-10	0.000267023	1.6e-09	9.98502e-05	0				1.65e-09	-0.389632	0.783133
8.25e-10	0	1.65e-09	0.000299551	0.000527872				1.7e-09	-1.42174	-0.281531
8.5e-10	0	1.7e-09	9.98502e-05	0.000316723				1.75e-09	1.15852	2.38013
8.75e-10	0.000534045	1.75e-09	0.000599101	0.000844595				1.8e-09	0.642472	-0.281531
9e-10	0.000534045	1.8e-09	0.000499251	0.000316723				1.85e-09	-0.389632	0.250801
9.25e-10	0.000267023	1.85e-09	0.000299551	0.000422297				1.9e-09	0.12642	-1.3462
9.5e-10	0.000534045	1.9e-09	0.000399401	0.000105574				1.95e-09	0.12642	2.91246
9.75e-10	0.000267023	1.95e-09	0.000399401	0.000950169				2e-09	0.642472	-0.281531
1e-09	0.000267023	2e-09	0.000499251	0.000316723				2.05e-09	-1.42174	1.8478
1.025e-09	0.000267023	2.05e-09	9.98502e-05	0.00073902				2.1e-09	1.15852	-0.281531
1.05e-09	0	2.1e-09	0.000599101	0.000316723				2.15e-09	0.642472	0.250801
1.075e-09	0.000801068	2.15e-09	0.000499251	0.000422297				2.2e-09	-1.42174	0.250801
1.1e-09	0	2.2e-09	9.98502e-05	0.000422297				2.25e-09	-1.93779	-0.281531
1.125e-09	0.000534045	2.25e-09	0	0.000316723				2.3e-09	0.642472	-0.813863
1.15e-09	0.000267023	2.3e-09	0.000499251	0.000211149				2.35e-09	0.12642	-0.281531
1.175e-09	0.000267023	2.35e-09	0.000399401	0.000316723				2.4e-09	-0.905684	-0.813863
1.2e-09	0.000267023	2.4e-09	0.0001997	0.000211149				2.45e-09	0.12642	0.783133
1.225e-09	0	2.45e-09	0.000399401	0.000527872				2.5e-09	-0.602326	0.250801
1.25e-09	0	2.5e-09	0.000299551	0.000422297				2.55e-09	-1.09903	-0.813863
1.275e-09	0.000801068	2.55e-09	0.0001997	0.000211149				2.6e-09	1.33178	2.36887
1.3e-09	0	2.6e-09	0.000698952	0.000844595				2.65e-09	-0.689099	-0.91769
1.325e-09	0	2.65e-09	0.000299551	0.000211149				2.7e-09	0.956873	1.23162
1.35e-09	0.000534045	2.7e-09	0.000698952	0.00073902				2.75e-09	-0.0523259	0.506239
1.375e-09	0.00133511	2.75e-09	0.000499251	0.000633446				2.8e-09	0.841533	2.93471
1.4e-09	0.000267023	2.8e-09	0.000798802	0.00147804				2.85e-09	3.12681	3.67232
1.425e-09	0.000267023	2.85e-09	0.0015976	0.00179476				2.9e-09	2.64	2.75708
1.45e-09	0.000534045	2.9e-09	0.00189715	0.00200591				2.95e-09	2.76243	-0.249432
1.475e-09	0.000801068	2.95e-09	0.00259611	0.00179476				3e-09	2.76132	3.78189
1.5e-09	0	3e-09	0.00409386	0.00538429				3.05e-09	1.89256	0.757923
1.525e-09	0.000534045	3.05e-09	0.00688967	0.00707348				3.1e-09	2.39916	0.61165
1.55e-09	0.000534045	3.1e-09	0.0203694	0.0280828				3.15e-09	0.934811	-0.666275
1.575e-09	0.000267023	3.15e-09	0.109136	0.138936				3.2e-09	-0.469586	0.201627
1.6e-09	0.000267023	3.2e-09	0.35357	0.412162				3.25e-09	-0.16373	-1.57781
1.625e-09	0	3.25e-09	0.645731	0.673775				3.3e-09	-1.82645	1.65312
1.65e-09	0	3.3e-09	0.825262	0.873311				3.35e-09	-1.18715	-0.981129
1.675e-09	0.000801068	3.35e-09	0.931403	0.929371				3.4e-09	-1.19725	0.550337
1.7e-09	0.000534045	3.4e-09	0.974438	0.97614				3.45e-09	-0.251988	1.69119
1.725e-09	0.000801068	3.45e-09	1	1				3.5e-09	-1.00716	-0.390069
1.75e-09	0.000534045	3.5e-09	0.995906	0.981102				3.55e-09	-2.02374	1.34222
1.775e-09	0	3.55e-09	0.984423	0.995988				3.6e-09	-0.693294	1.66125
1.8e-09	0.000267023	3.6e-09	0.993909	0.995038				3.65e-09	-3.83171	0.809904
1.825e-09	0	3.65e-09	0.957464	0.981313				3.7e-09	-0.371716	-0.701067
1.85e-09	0.00106809	3.7e-09	0.98682	0.960938				3.75e-09	-1.43782	-1.83631
1.875e-09	0.000534045	3.75e-09	0.971143	0.944679				3.8e-09	-2.6101	0.468972
1.9e-09	0.000267023	3.8e-09	0.954568	0.962943				3.85e-09	-2.11036	0.235611
1.925e-09	0.000534045	3.85e-09	0.954468	0.955659				3.9e-09	-2.72265	-1.7353
1.95e-09	0	3.9e-09	0.943485	0.930954				3.95e-09	-1.58261	-1.78865
1.975e-09	0.00106809	3.95e-09	0.949576	0.92557				4e-09	-2.70124	-2.25056
2e-09	0.000267023	4e-09	0.9336	0.916174				4.05e-09	-1.47695	-1.4542
2.025e-09	0	4.05e-09	0.940589	0.919236				4.1e-09	-2.46366	-1.92731
2.05e-09	0.000267023	4.1e-09	0.926111	0.909734				4.15e-09	-1.12355	-0.472493
2.075e-09	0.000534045	4.15e-09	0.934199	0.919341				4.2e-09	-1.06736	-1.8196
2.1e-09	0.000534045	4.2e-09	0.929805	0.901288				4.25e-09	-1.66232	-1.37246
2.125e-09	0	4.25e-09	0.919221	0.900971				4.3e-09	-0.859188	0.819685
2.15e-09	0	4.3e-09	0.922217	0.917863				4.35e-09	-0.858416	-0.108147
2.175e-09	0.000534045	4.35e-09	0.917524	0.904244				4.4e-09	-0.258519	0.0691305
2.2e-09	0.000267023	4.4e-09	0.918722	0.901499				4.45e-09	-1.88418	-0.776711
2.225e-09	0.000801068	4.45e-09	0.898652	0.88883				4.5e-09	-3.16104	-3.20779
2.25e-09	0.000801068	4.5e-09	0.881977	0.860853				4.55e-09	-0.347721	-3.75137
2.275e-09	0	4.55e-09	0.904343	0.851351				4.6e-09	-3.21377	1.28931
2.3e-09	0.000267023	4.6e-09	0.872691	0.895798				4.65e-09	-1.58134	-1.13945
2.325e-09	0.000801068	4.65e-09	0.883874	0.868032				4.7e-09	-1.81344	-1.81634
2.35e-09	0.000534045	4.7e-09	0.877384	0.857264				4.75e-09	-2.08374	-1.2403
2.375e-09	0.000267023	4.75e-09	0.870594	0.858636				4.8e-09	-1.14969	-0.45839
2.4e-09	0.000534045	4.8e-09	0.875187	0.862014				4.85e-09	-2.02246	-0.0968683
2.425e-09	0	4.85e-09	0.862806	0.861486				4.9e-09	-2.03349	-0.815029
2.45e-09	0.000534045	4.9e-09	0.858612	0.850612				4.95e-09	-1.54117	-0.563411
2.475e-09	0.000267023	4.95e-09	0.859111	0.849029				5e-09	-0.0620768	-2.24908
2.5e-09	0.000534045	5e-09	0.868797	0.829075				5.05e-09	-1.47178	-0.0466732
2.525e-09	0.000534045	5.05e-09	0.851623	0.845967				5.1e-09	-1.8603	-1.64128
2.55e-09	0.000801068	5.1e-09	0.843934	0.826964				5.15e-09	-0.690706	0.249238
2.575e-09	0.000534045	5.15e-09	0.850724	0.840794				5.2e-09	-1.66986	-2.26441
2.6e-09	0.000267023	5.2e-09	0.837644	0.813239				5.25e-09	-1.49103	-0.920713
2.625e-09	0	5.25e-09	0.835347	0.822002				5.3e-09	-0.630168	1.04573
2.65e-09	0.000534045	5.3e-09	0.839341	0.836571				5.35e-09	-0.130247	-1.81132
2.675e-09	0.000534045	5.35e-09	0.84004	0.806166				5.4e-09	-1.22613	-0.781554
2.7e-09	0.000267023	5.4e-09	0.826161	0.812078				5.45e-09	-0.2958	-0.484046
2.725e-09	0.000534045	5.45e-09	0.830854	0.811128				5.5e-09	-0.168164	-1.11012
2.75e-09	0.000801068	5.5e-09	0.828258	0.801626				5.55e-09	-1.53954	-0.837329
2.775e-09	0.000534045	5.55e-09	0.811982	0.800465				5.6e-09	-0.229485	-0.942283
2.8e-09	0	5.6e-09	0.82007	0.795819				5.65e-09	0.422903	-0.359997
2.825e-09	0.000801068	5.65e-09	0.822167	0.797508				5.7e-09	-0.452023	-1.79193
2.85e-09	0.00213618	5.7e-09	0.810484	0.780722				5.75e-09	-0.0607114	-2.38292
2.875e-09	0.00160214	5.75e-09	0.810285	0.771748				5.8e-09	-2.38848	-0.335699
2.9e-09	0.00106809	5.8e-09	0.785721	0.786951				5.85e-09	-0.317591	-0.404022
2.925e-09	0.00186916	5.85e-09	0.800699	0.782834				5.9e-09	-0.419146	0.291032
2.95e-09	0.00213618	5.9e-09	0.796206	0.785684				5.95e-09	1.04469	1.18546
2.975e-09	0.00267023	5.95e-09	0.805691	0.790329				6e-09	-0.156898	-1.06623
3e-09	0.0034713	6e-09	0.791413	0.76647				6.05e-09	-1.25211	-0.511649
3.025e-09	0.00400534	6.05e-09	0.778133	0.768053				6.1e-09	-1.18041	-0.646417
3.05e-09	0.00534045	6.1e-09	0.775237	0.763408				6.15e-09	0.167747	0.544115
3.075e-09	0.00747664	6.15e-09	0.783625	0.770693				6.2e-09	-0.0428271	-0.674969
3.1e-09	0.00720961	6.2e-09	0.778233	0.756334				6.25e-09	0.0127151	-1.24453
3.125e-09	0.012016	6.25e-09	0.775237	0.747889				6.3e-09	-0.813774	-0.581384
3.15e-09	0.0176235	6.3e-09	0.764553	0.750528				6.35e-09	1.18999	-1.63692
3.175e-09	0.0488652	6.35e-09	0.778732	0.737859				6.4e-09	-1.11894	-0.182763
3.2e-09	0.111615	6.4e-09	0.755167	0.747572				6.45e-09	-0.851824	0.503134
3.225e-09	0.223765	6.45e-09	0.754169	0.750422				6.5e-09	-0.928667	0.42814
3.25e-09	0.369025	6.5e-09	0.750175	0.746516				6.55e-09	-0.385358	-0.818708
3.275e-09	0.512684	6.55e-09	0.751573	0.732264				6.6e-09	-0.739109	-0.622551
3.3e-09	0.666489	6.6e-09	0.745182	0.730785				6.65e-09	-0.863901	-0.486243
3.325e-09	0.76235	6.65e-09	0.740789	0.72878				6.7e-09	0.502378	0.321883
3.35e-09	0.827503	6.7e-09	0.749276	0.732686				6.75e-09	-1.90117	-2.30668
3.375e-09	0.884913	6.75e-09	0.725312	0.706503				6.8e-09	0.0976073	1.12377
3.4e-09	0.935648	6.8e-09	0.739291	0.733425				6.85e-09	1.31994	1.01852
3.425e-09	0.941789	6.85e-09	0.74658	0.729413				6.9e-09	-2.20817	-1.8793
3.45e-09	0.957276	6.9e-09	0.71323	0.701119				6.95e-09	0.988414	-0.888443
3.475e-09	0.987717	6.95e-09	0.737394	0.706715				7e-09	1.17198	1.43379
3.5e-09	0.972497	7e-09	0.735796	0.723818				7.05e-09	0.967974	-0.6661
3.525e-09	0.963952	7.05e-09	0.730904	0.702597				7.1e-09	-0.862905	-0.328482
3.55e-09	0.977837	7.1e-09	0.712232	0.702492				7.15e-09	-0.895935	0.647553
3.575e-09	1	7.15e-09	0.708837	0.707876				7.2e-09	-1.23844	-0.721154
3.6e-09	0.960481	7.2e-09	0.702846	0.693095				7.25e-09	-0.78068	0.0297844
3.625e-09	0.948999	7.25e-09	0.703645	0.696579				7.3e-09	0.255809	-0.738849
3.65e-09	0.975434	7.3e-09	0.709336	0.687078				7.35e-09	-2.29155	-0.660937
3.675e-09	0.974099	7.35e-09	0.684973	0.684861				7.4e-09	-1.26027	-0.188123
3.7e-09	0.904673	7.4e-09	0.690664	0.686022				7.45e-09	1.71137	-0.161357
3.725e-09	0.946595	7.45e-09	0.712531	0.683383				7.5e-09	1.21966	-1.98909
3.75e-09	0.91749	7.5e-09	0.705442	0.665013				7.55e-09	-0.955875	0.464445
3.775e-09	0.959146	7.55e-09	0.684373	0.68296				7.6e-09	1.51655	-0.658157
3.8e-09	0.925501	7.6e-09	0.701947	0.670608				7.65e-09	1.16489	1.65749
3.825e-09	0.924166	7.65e-09	0.696056	0.687289				7.7e-09	1.76498	-0.649368
3.85e-09	0.916689	7.7e-09	0.698053	0.665013				7.75e-09	1.05517	-0.606291
3.875e-09	0.922296	7.75e-09	0.689266	0.662584				7.8e-09	0.39787	0.679746
3.9e-09	0.91215	7.8e-09	0.680979	0.670608				7.85e-09	0.293544	0.225412
3.925e-09	0.894526	7.85e-09	0.677284	0.664062				7.9e-09	0.710685	-0.447694
3.95e-09	0.891856	7.9e-09	0.677883	0.655722				7.95e-09	1.77575	-0.579322
3.975e-09	0.911348	7.95e-09	0.683774	0.651921				8e-09	-0.8274	-0.203852
4e-09	0.902003	8e-09	0.65971	0.652344				8.05e-09	-1.23401	0.771196
4.025e-09	0.892123	8.05e-09	0.65362	0.657728				8.1e-09	0.459277	0.155293
4.05e-09	0.911081	8.1e-09	0.664603	0.649916				8.15e-09	0.22548	0.648603
4.075e-09	0.916155	8.15e-09	0.65991	0.651288				8.2e-09	-0.0354823	-0.420812
4.1e-09	0.90227	8.2e-09	0.655017	0.63978				8.25e-09	0.0942929	0.876174
4.125e-09	0.900401	8.25e-09	0.65332	0.647804				8.3e-09	-1.8131	0.295916
4.15e-09	0.874232	8.3e-09	0.635247	0.640414				8.35e-09	1.01298	-0.354164
4.175e-09	0.881175	8.35e-09	0.655317	0.632496				8.4e-09	0.488006	0.46389
4.2e-09	0.868892	8.4e-09	0.648427	0.636613				8.45e-09	-1.21266	-1.74416
4.225e-09	0.900668	8.45e-09	0.632152	0.616026				8.5e-09	0.828539	0.382877
4.25e-09	0.903872	8.5e-09	0.645831	0.630807				8.55e-09	1.82583	1.07579
4.275e-09	0.877971	8.55e-09	0.651123	0.633868				8.6e-09	1.55943	0.469093
4.3e-09	0.893725	8.6e-09	0.646331	0.626372				8.65e-09	0.134548	0.250932
4.325e-09	0.859546	8.65e-09	0.632351	0.622044				8.7e-09	0.680963	-1.14666
4.35e-09	0.878772	8.7e-09	0.634049	0.608214				8.75e-09	0.392368	0.852805
4.375e-09	0.891589	8.75e-09	0.629156	0.621833				8.8e-09	0.591562	1.25446
4.4e-09	0.873431	8.8e-09	0.628158	0.622572				8.85e-09	-0.112102	-0.857782
4.425e-09	0.892657	8.85e-09	0.62007	0.603146				8.9e-09	1.63178	1.97626
4.45e-09	0.866756	8.9e-09	0.631253	0.623416				8.95e-09	0.262267	-1.47947
4.475e-09	0.853138	8.95e-09	0.617973	0.593328				9e-09	1.05555	1.16493
4.5e-09	0.849132	9e-09	0.621667	0.612014				9.05e-09	-0.12985	0.928678
4.525e-09	0.835514	9.05e-09	0.609885	0.607686				9.1e-09	1.06248	1.40883
4.55e-09	0.877437	9.1e-09	0.616675	0.609058				9.15e-09	-0.89858	-0.732626
4.575e-09	0.860614	9.15e-09	0.598902	0.589633				9.2e-09	1.1059	0.0509759
4.6e-09	0.811749	9.2e-09	0.611982	0.593433				9.25e-09	-0.300859	0.0452649
4.625e-09	0.853138	9.25e-09	0.598602	0.591005				9.3e-09	2.24769	0.691997
4.65e-09	0.857143	9.3e-09	0.615876	0.59375				9.35e-09	-0.205348	0.103732
4.675e-09	0.848865	9.35e-09	0.594508	0.586782				9.4e-09	0.948093	1.24662
4.7e-09	0.857677	9.4e-09	0.600999	0.593433				9.45e-09	0.480872	0.0349545
4.725e-09	0.843792	9.45e-09	0.595007	0.581609				9.5e-09	0.688334	-0.0207214
4.75e-09	0.82964	9.5e-09	0.594209	0.578864				9.55e-09	-0.0822104	-1.28106
4.775e-09	0.831242	9.55e-09	0.585921	0.566723				9.6e-09	1.65408	0.544364
4.8e-09	0.832577	9.6e-09	0.596805	0.578653				9.65e-09	0.0958313	1.04548
4.825e-09	0.852336	9.65e-09	0.582526	0.580236				9.7e-09	0.236528	0.8529
4.85e-09	0.824833	9.7e-09	0.581228	0.576436				9.75e-09	1.30836	0.669676
4.875e-09	0.82777	9.75e-09	0.587019	0.572741				9.8e-09	-0.0183805	-0.351636
4.9e-09	0.81255	9.8e-09	0.574638	0.562606				9.85e-09	0.350238	2.15318
4.925e-09	0.828571	9.85e-09	0.575137	0.579709				9.9e-09	-0.168021	1.4012
4.95e-09	0.829907	9.9e-09	0.568947	0.571685				9.95e-09	0.437771	-0.0280337
4.975e-09	0.851802	9.95e-09	0.571243	0.558488				1e-08	0.460923	-0.554264
5e-09	0.835781	1e-08	0.569146	0.552259				1.005e-08	1.25601	1.81532
5.025e-09	0.817356	1.005e-08	0.572841	0.568201				1.01e-08	-0.226912	2.79748
5.05e-09	0.806943	1.01e-08	0.559461	0.57348				1.015e-08	1.01062	1.99582
5.075e-09	0.818692	1.015e-08	0.56645	0.565139				1.02e-08	0.497469	0.759148
5.1e-09	0.816822	1.02e-08	0.560359	0.553526				1.025e-08	1.91155	-0.861339
5.125e-09	0.793057	1.025e-08	0.568647	0.539062				1.03e-08	1.21625	-1.39065
5.15e-09	0.813351	1.03e-08	0.561258	0.532939				1.035e-08	1.56627	1.45507
5.175e-09	0.805874	1.035e-08	0.561658	0.552365				1.04e-08	0.080038	1.59609
5.2e-09	0.803471	1.04e-08	0.548477	0.551309				1.045e-08	2.59091	0.363096
5.225e-09	0.810948	1.045e-08	0.564853	0.539907				1.05e-08	-0.879297	0.375042
5.25e-09	0.774366	1.05e-08	0.537094	0.537901				1.055e-08	2.5488	-1.72431
5.275e-09	0.801869	1.055e-08	0.56016	0.520059				1.06e-08	1.48634	-0.0810298
5.3e-09	0.781575	1.06e-08	0.550175	0.5303				1.065e-08	0.732996	2.8259
5.325e-09	0.820294	1.065e-08	0.542486	0.549937				1.07e-08	1.83352	1.36832
5.35e-09	0.80534	1.07e-08	0.548377	0.536951				1.075e-08	0.854668	-1.31806
5.375e-09	0.817356	1.075e-08	0.539091	0.514886				1.08e-08	1.37701	-0.0103698
5.4e-09	0.806676	1.08e-08	0.540789	0.522593				1.085e-08	-0.327626	-0.351713
5.425e-09	0.800267	1.085e-08	0.526311	0.518053				1.09e-08	1.23667	0.716809
5.45e-09	0.781575	1.09e-08	0.535597	0.523965				1.095e-08	0.0193583	-0.38398
5.475e-09	0.797063	1.095e-08	0.524713	0.51383				1.1e-08	1.54774	-1.11702
5.5e-09	0.804005	1.1e-08	0.533699	0.50644				1.105e-08	1.12893	-0.045012
5.525e-09	0.790921	1.105e-08	0.528607	0.512352				1.11e-08	-0.249311	1.04538
5.55e-09	0.769025	1.11e-08	0.516625	0.51837				1.115e-08	2.3577	1.30416
5.575e-09	0.767156	1.115e-08	0.5333	0.518264				1.12e-08	1.72754	-0.746826
5.6e-09	0.781041	1.12e-08	0.52671	0.501267				1.125e-08	1.28743	0.0691756
5.625e-09	0.786115	1.125e-08	0.521518	0.505279				1.13e-08	3.09414	1.16041
5.65e-09	0.799199	1.13e-08	0.532401	0.511296				1.135e-08	0.812875	-0.722455
5.675e-09	0.775167	1.135e-08	0.514129	0.495671				1.14e-08	-0.0464304	2.25894
5.7e-09	0.777837	1.14e-08	0.506041	0.515414				1.145e-08	0.412688	-0.0680502
5.725e-09	0.775434	1.145e-08	0.507339	0.496622				1.15e-08	1.95865	0.968524
5.75e-09	0.776502	1.15e-08	0.516326	0.502217				1.155e-08	1.39175	-0.361037
5.775e-09	0.76235	1.155e-08	0.510334	0.490709				1.16e-08	0.737543	0.10697
5.8e-09	0.79012	1.16e-08	0.503744	0.492188				1.165e-08	0.931355	0.194662
5.825e-09	0.775434	1.165e-08	0.503145	0.490921				1.17e-08	1.4375	-0.895672
5.85e-09	0.775167	1.17e-08	0.504743	0.481208				1.175e-08	0.0495096	0.0266252
5.875e-09	0.786649	1.175e-08	0.49306	0.485959				1.18e-08	1.17738	0.7869
5.9e-09	0.743658	1.18e-08	0.499051	0.489548				1.185e-08	-0.0222206	-0.553383
5.925e-09	0.771963	1.185e-08	0.488767	0.478146				1.19e-08	0.633503	0.768849
5.95e-09	0.764753	1.19e-08	0.491463	0.485747				1.195e-08	3.78719	-0.845676
5.975e-09	0.769559	1.195e-08	0.511533	0.472445				1.2e-08	-0.406597	-0.502151
6e-09	0.744459	1.2e-08	0.480479	0.473079				1.205e-08	2.45425	0.901175
6.025e-09	0.772764	1.205e-08	0.498452	0.481208				1.21e-08	1.57442	1.59262
6.05e-09	0.760748	1.21e-08	0.490464	0.484269				1.215e-08	0.690955	1.73262
6.075e-09	0.762617	1.215e-08	0.482476	0.483425				1.22e-08	2.65677	0.942131
6.1e-09	0.736983	1.22e-08	0.494159	0.476035				1.225e-08	1.01363	0.957243
6.125e-09	0.764219	1.225e-08	0.480979	0.474345				1.23e-08	0.989612	-1.58973
6.15e-09	0.735113	1.23e-08	0.478982	0.454709				1.235e-08	0.963162	0.104931
6.175e-09	0.75247	1.235e-08	0.476985	0.464844				1.24e-08	2.24902	-0.446618
6.2e-09	0.748732	1.24e-08	0.483974	0.459248				1.245e-08	1.22827	0.0135246
6.225e-09	0.716422	1.245e-08	0.475187	0.460726				1.25e-08	0.935917	0.641932
6.25e-09	0.743124	1.25e-08	0.471393	0.463366				1.255e-08	1.6259	-0.155938
6.275e-09	0.755941	1.255e-08	0.474289	0.456081				1.26e-08	-0.476494	-0.363184
6.3e-09	0.757276	1.26e-08	0.458213	0.452914				1.265e-08	1.289	1.80819
6.325e-09	0.755674	1.265e-08	0.468397	0.466216				1.27e-08	1.36221	-0.155102
6.35e-09	0.728972	1.27e-08	0.467099	0.450908				1.275e-08	3.50454	0.627732
6.375e-09	0.755674	1.275e-08	0.47978	0.454603				1.28e-08	0.00411635	-0.0773949
6.4e-09	0.738852	1.28e-08	0.454418	0.448057				1.285e-08	0.720923	0.580838
6.425e-09	0.729506	1.285e-08	0.457514	0.450908				1.29e-08	1.30523	1.17888
6.45e-09	0.737784	1.29e-08	0.45971	0.453336				1.295e-08	0.13188	0.405615
6.475e-09	0.734312	1.295e-08	0.450125	0.446368				1.3e-08	1.44817	1.85483
6.5e-09	0.71749	1.3e-08	0.457214	0.454603				1.305e-08	1.72172	1.88468
6.525e-09	0.737517	1.305e-08	0.457314	0.453125				1.31e-08	2.41602	0.130357
6.55e-09	0.71215	1.31e-08	0.46021	0.439506				1.315e-08	1.91096	1.92867
6.575e-09	0.739386	1.315e-08	0.455117	0.450063				1.32e-08	0.635422	1.92621
6.6e-09	0.714019	1.32e-08	0.444933	0.448374				1.325e-08	-0.0592912	-0.200752
6.625e-09	0.745794	1.325e-08	0.438642	0.432327				1.33e-08	-1.03155	3.07012
6.65e-09	0.738318	1.33e-08	0.430554	0.452808				1.335e-08	-0.132509	0.118421
6.675e-09	0.721228	1.335e-08	0.434848	0.431271				1.34e-08	0.99619	-0.162332
6.7e-09	0.733511	1.34e-08	0.440639	0.427787				1.345e-08	-0.485086	1.20583
6.725e-09	0.712684	1.345e-08	0.429256	0.435389				1.35e-08	0.874598	0.909514
6.75e-09	0.723899	1.35e-08	0.436545	0.431799				1.355e-08	2.69686	0.517256
6.775e-09	0.732977	1.355e-08	0.44683	0.427576				1.36e-08	1.40838	0.360515
6.8e-09	0.700401	1.36e-08	0.436745	0.424937				1.365e-08	-0.543589	1.94499
6.825e-09	0.71749	1.365e-08	0.422366	0.43391				1.37e-08	-0.0800455	0.789454
6.85e-09	0.719092	1.37e-08	0.423764	0.42462				1.375e-08	1.67402	-0.0231352
6.875e-09	0.710814	1.375e-08	0.43355	0.417652				1.38e-08	1.32225	1.91378
6.9e-09	0.685714	1.38e-08	0.429656	0.428948				1.385e-08	0.51967	0.0268874
6.925e-09	0.695594	1.385e-08	0.422866	0.414907				1.39e-08	2.95882	-0.812969
6.95e-09	0.718558	1.39e-08	0.437044	0.407834				1.395e-08	1.41114	1.14603
6.975e-09	0.723097	1.395e-08	0.425462	0.419236				1.4e-08	1.76567	0.256243
7e-09	0.712684	1.4e-08	0.426161	0.411845				1.405e-08	0.0850415	-0.588789
7.025e-09	0.706542	1.405e-08	0.413779	0.404772				1.41e-08	1.85534	-0.13271
7.05e-09	0.687583	1.41e-08	0.423565	0.40625				1.415e-08	2.55556	0.534576
7.075e-09	0.699599	1.415e-08	0.42646	0.409101				1.42e-08	-0.760139	-0.364524
7.1e-09	0.714019	1.42e-08	0.403694	0.40171				1.425e-08	1.2504	2.77911
7.125e-09	0.681976	1.425e-08	0.414978	0.420714				1.43e-08	0.692249	-0.963162
7.15e-09	0.694526	1.43e-08	0.409885	0.394848				1.435e-08	1.08904	-0.67382
7.175e-09	0.728972	1.435e-08	0.410884	0.39527				1.44e-08	0.257578	-0.482042
7.2e-09	0.684112	1.44e-08	0.404094	0.395059				1.445e-08	1.04781	2.25481
7.225e-09	0.699332	1.445e-08	0.407589	0.411318				1.45e-08	0.876265	0.850333
7.25e-09	0.684913	1.45e-08	0.404993	0.40076				1.455e-08	-1.00681	-0.75596
7.275e-09	0.698531	1.455e-08	0.391613	0.388936				1.46e-08	0.467314	0.81399
7.3e-09	0.689987	1.46e-08	0.399401	0.397593				1.465e-08	0.627161	0.976217
7.325e-09	0.68518	1.465e-08	0.398902	0.397171				1.47e-08	0.57974	-0.129703
7.35e-09	0.691055	1.47e-08	0.397104	0.388619				1.475e-08	1.47162	1.34775
7.375e-09	0.696662	1.475e-08	0.401198	0.396643				1.48e-08	0.989084	1.02695
7.4e-09	0.668892	1.48e-08	0.396705	0.393159				1.485e-08	0.566902	1.28278
7.425e-09	0.700668	1.485e-08	0.392611	0.39337				1.49e-08	-0.804892	3.34648
7.45e-09	0.692924	1.49e-08	0.382626	0.405089				1.495e-08	0.438583	-1.11281
7.475e-09	0.659012	1.495e-08	0.388917	0.375317				1.5e-08	0.478191	1.9688
7.5e-09	0.70227	1.5e-08	0.387718	0.393476				1.505e-08	1.92194	0.725546
7.525e-09	0.691856	1.505e-08	0.395207	0.384185				1.51e-08	-0.331928	1.04815
7.55e-09	0.662483	1.51e-08	0.37983	0.384818				1.515e-08	0.985869	-0.653661
7.575e-09	0.700401	1.515e-08	0.38652	0.372677				1.52e-08	0.181615	0.974475
7.6e-09	0.673698	1.52e-08	0.38013	0.381546				1.525e-08	1.11223	0.724768
7.625e-09	0.669159	1.525e-08	0.384423	0.37859				1.53e-08	0.870779	1.0609
7.65e-09	0.674499	1.53e-08	0.381528	0.379329				1.535e-08	1.96499	0.654751
7.675e-09	0.693458	1.535e-08	0.38682	0.375422				1.54e-08	1.05084	0.803711
7.7e-09	0.66008	1.54e-08	0.37983	0.375				1.545e-08	0.935491	-1.48415
7.725e-09	0.664619	1.545e-08	0.377733	0.359375				1.55e-08	0.392689	0.169683
7.75e-09	0.669159	1.55e-08	0.37304	0.368349				1.555e-08	1.01522	3.10331
7.775e-09	0.67984	1.555e-08	0.375437	0.385241				1.56e-08	0.684447	-0.0442114
7.8e-09	0.670494	1.56e-08	0.372042	0.364337				1.565e-08	-1.51283	-1.12372
7.825e-09	0.658478	1.565e-08	0.357364	0.356313				1.57e-08	-0.213354	-0.209857
7.85e-09	0.664887	1.57e-08	0.363854	0.360642				1.575e-08	1.88422	1.59499
7.875e-09	0.676903	1.575e-08	0.375137	0.37046				1.58e-08	0.584526	-1.20686
7.9e-09	0.668892	1.58e-08	0.365951	0.351879				1.585e-08	1.53974	0.204008
7.925e-09	0.651802	1.585e-08	0.370344	0.359269				1.59e-08	1.79775	1.94601
7.95e-09	0.647797	1.59e-08	0.370544	0.368666				1.595e-08	-0.146943	-0.649191
7.975e-09	0.658745	1.595e-08	0.357564	0.351457				1.6e-08	-0.142733	1.01061
8e-09	0.640587	1.6e-08	0.356266	0.360325				1.605e-08	-1.04328	0.77362
8.025e-09	0.66729	1.605e-08	0.349576	0.35758				1.61e-08	-0.571039	0.778277
8.05e-09	0.640854	1.61e-08	0.351073	0.356313				1.615e-08	0.121423	1.07789
8.075e-09	0.65474	1.615e-08	0.353869	0.356841				1.62e-08	1.30432	-0.152823
8.1e-09	0.657677	1.62e-08	0.359561	0.348079				1.625e-08	-0.0419954	2.0425
8.125e-09	0.665688	1.625e-08	0.350275	0.360114				1.63e-08	2.34122	0.00185674
8.15e-09	0.648865	1.63e-08	0.363055	0.346495				1.635e-08	2.17352	0.0158556
8.175e-09	0.639519	1.635e-08	0.360759	0.345334				1.64e-08	2.02117	2.55179
8.2e-09	0.644059	1.64e-08	0.358562	0.359375				1.645e-08	1.93574	-1.13389
8.225e-09	0.649132	1.645e-08	0.356765	0.335938				1.65e-08	1.06618	0.33601
8.25e-09	0.609613	1.65e-08	0.350374	0.343539				1.655e-08	0.329774	0.983251
8.275e-09	0.656342	1.655e-08	0.344783	0.346178				1.66e-08	0.907029	1.38572
8.3e-09	0.633111	1.66e-08	0.34688	0.34734				1.665e-08	0.801137	-0.862283
8.325e-09	0.648064	1.665e-08	0.344983	0.332665				1.67e-08	0.968745	0.28109
8.35e-09	0.642991	1.67e-08	0.344683	0.33826				1.675e-08	0.344201	1.23149
8.375e-09	0.632043	1.675e-08	0.33979	0.342694				1.68e-08	2.24707	-0.056414
8.4e-09	0.63231	1.68e-08	0.349576	0.333826				1.685e-08	0.755768	0.0385425
8.425e-09	0.632844	1.685e-08	0.33969	0.333193				1.69e-08	0.692912	0.73957
8.45e-09	0.664085	1.69e-08	0.338093	0.336149				1.695e-08	-1.2412	-0.00479017
8.475e-09	0.626168	1.695e-08	0.325711	0.330553				1.7e-08	-0.614659	0.608566
8.5e-09	0.620561	1.7e-08	0.328108	0.332981				1.705e-08	0.726783	2.58709
8.525e-09	0.651535	1.705e-08	0.334598	0.343433				1.71e-08	2.66524	1.626
8.55e-09	0.629105	1.71e-08	0.344483	0.336571				1.715e-08	0.0567993	0.337225
8.575e-09	0.635247	1.715e-08	0.328308	0.327808				1.72e-08	0.0600845	-0.77673
8.6e-09	0.635514	1.72e-08	0.327109	0.320101				1.725e-08	1.97046	-1.73403
8.625e-09	0.602403	1.725e-08	0.336795	0.313345				1.73e-08	0.0257043	-0.398335
8.65e-09	0.619493	1.73e-08	0.324513	0.319996				1.735e-08	-0.082201	1.4847
8.675e-09	0.636849	1.735e-08	0.322716	0.329814				1.74e-08	2.08017	0.61294
8.7e-09	0.6251	1.74e-08	0.333799	0.323585				1.745e-08	0.527589	1.13874
8.725e-09	0.636849	1.745e-08	0.323814	0.325486				1.75e-08	-0.0411905	-0.922201
8.75e-09	0.615487	1.75e-08	0.319421	0.312394				1.755e-08	1.10534	-0.0141184
8.775e-09	0.63498	1.755e-08	0.324713	0.316512				1.76e-08	-1.29183	0.348338
8.8e-09	0.610948	1.76e-08	0.310035	0.317462				1.765e-08	-0.481261	2.12313
8.825e-09	0.638184	1.765e-08	0.31343	0.326541				1.77e-08	-1.89395	1.66359
8.85e-09	0.611749	1.77e-08	0.304343	0.322741				1.775e-08	0.0398971	0.887806
8.875e-09	0.589586	1.775e-08	0.314029	0.317145				1.78e-08	-1.29162	-0.463985
8.9e-09	0.603738	1.78e-08	0.305442	0.308277				1.785e-08	0.0559212	0.0793796
8.925e-09	0.630174	1.785e-08	0.311832	0.310283				1.79e-08	1.21017	0.901336
8.95e-09	0.623498	1.79e-08	0.317124	0.313872				1.795e-08	-1.06384	-0.0710973
8.975e-09	0.621629	1.795e-08	0.303345	0.307221				1.8e-08	1.02795	0.678732
9e-09	0.589853	1.8e-08	0.313829	0.310389				1.805e-08	1.61239	-0.372276
9.025e-09	0.639519	1.805e-08	0.315926	0.303315				1.81e-08	2.10857	0.472642
9.05e-09	0.626435	1.81e-08	0.317524	0.30701				1.815e-08	-0.0182176	-1.1239
9.075e-09	0.599466	1.815e-08	0.304643	0.296875				1.82e-08	1.83613	1.77799
9.1e-09	0.641656	1.82e-08	0.313729	0.312183				1.825e-08	3.73191	-0.367607
9.125e-09	0.611482	1.825e-08	0.323015	0.298986				1.83e-08	-0.610531	0.59131
9.15e-09	0.616555	1.83e-08	0.298053	0.303315				1.835e-08	1.48462	0.180445
9.175e-09	0.608812	1.835e-08	0.308437	0.299937				1.84e-08	0.572355	1.21705
9.2e-09	0.620294	1.84e-08	0.302346	0.304688				1.845e-08	-0.5816	1.27627
9.225e-09	0.612016	1.845e-08	0.294958	0.303948				1.85e-08	0.460111	1.29772
9.25e-09	0.595461	1.85e-08	0.299551	0.302998				1.855e-08	-0.698627	0.618818
9.275e-09	0.587183	1.855e-08	0.292162	0.298142				1.86e-08	1.10095	0.392481
9.3e-09	0.603471	1.86e-08	0.300849	0.295819				1.865e-08	0.473556	-0.252745
9.325e-09	0.603738	1.865e-08	0.296355	0.291174				1.87e-08	1.5055	-0.0637229
9.35e-09	0.621095	1.87e-08	0.300849	0.291174				1.875e-08	0.0970849	0.829603
9.375e-09	0.604806	1.875e-08	0.292162	0.29508				1.88e-08	-0.187763	1.0367
9.4e-09	0.59733	1.88e-08	0.289566	0.295186				1.885e-08	-0.252285	-0.0768291
9.425e-09	0.612016	1.885e-08	0.288168	0.288007				1.89e-08	0.351862	-0.390042
9.45e-09	0.606142	1.89e-08	0.290364	0.285262				1.895e-08	-0.384203	1.44568
9.475e-09	0.591722	1.895e-08	0.285372	0.294341				1.9e-08	-0.656366	-1.21303
9.5e-09	0.593858	1.9e-08	0.282876	0.278716				1.905e-08	0.323691	1.2248
9.525e-09	0.585047	1.905e-08	0.287069	0.291068				1.91e-08	-0.379411	-0.112097
9.55e-09	0.587717	1.91e-08	0.282277	0.282728				1.915e-08	0.510684	0.170408
9.575e-09	0.608278	1.915e-08	0.285971	0.283256				1.92e-08	-1.38038	1.61555
9.6e-09	0.594393	1.92e-08	0.274888	0.290118				1.925e-08	-0.905647	-0.545561
9.625e-09	0.601335	1.925e-08	0.276385	0.277344				1.93e-08	1.41895	1.44428
9.65e-09	0.609613	1.93e-08	0.287668	0.287162				1.935e-08	-1.1857	-0.981069
9.675e-09	0.603471	1.935e-08	0.272891	0.273015				1.94e-08	1.73189	-0.645217
9.7e-09	0.588518	1.94e-08	0.287269	0.27386				1.945e-08	1.83142	2.21278
9.725e-09	0.573565	1.945e-08	0.28677	0.288323				1.95e-08	0.999307	1.22357
9.75e-09	0.589586	1.95e-08	0.281378	0.281989				1.955e-08	-0.274113	1.32914
9.775e-09	0.594393	1.955e-08	0.273689	0.281567				1.96e-08	-2.163	-2.63243
9.8e-09	0.578905	1.96e-08	0.262806	0.259291				1.965e-08	0.988869	-1.68717
9.825e-09	0.589052	1.965e-08	0.278283	0.263408				1.97e-08	1.4125	0.562313
9.85e-09	0.606943	1.97e-08	0.279481	0.274493				1.975e-08	0.320012	0.348775
9.875e-09	0.579706	1.975e-08	0.272791	0.272382				1.98e-08	0.125193	0.884722
9.9e-09	0.582911	1.98e-08	0.270794	0.274282				1.985e-08	-0.129528	-0.58097
9.925e-09	0.583712	1.985e-08	0.268497	0.265519				1.99e-08	0.0192089	-0.126064
9.95e-09	0.568758	1.99e-08	0.268298	0.266997				1.995e-08	0.670644	-0.644738
9.975e-09	0.577036	1.995e-08	0.270694	0.263302				2e-08	-0.437993	-1.56404
1e-08	0.595194	2e-08	0.264004	0.257496				2.005e-08	0.99067	-1.40855
1.0025e-08	0.555941	2.005e-08	0.270394	0.25739				2.01e-08	0.403153	-1.09257
1.005e-08	0.549533	2.01e-08	0.2664	0.258129				2.015e-08	0.845363	0.166139
1.0075e-08	0.584246	2.015e-08	0.267698	0.26383				2.02e-08	1.79582	0.585595
1.01e-08	0.581575	2.02e-08	0.271593	0.265097				2.025e-08	-0.554535	-0.583668
1.0125e-08	0.575968	2.025e-08	0.258612	0.258024				2.03e-08	1.47017	0.0138964
1.015e-08	0.581308	2.03e-08	0.267998	0.260241				2.035e-08	2.18671	0.390431
1.0175e-08	0.576502	2.035e-08	0.270694	0.261296				2.04e-08	1.11698	0.363349
1.02e-08	0.566622	2.04e-08	0.264304	0.260241				2.045e-08	-1.01997	0.335856
1.0225e-08	0.57036	2.045e-08	0.252521	0.259185				2.05e-08	0.187526	1.5253
1.025e-08	0.564486	2.05e-08	0.257713	0.264464				2.055e-08	0.253463	-1.14246
1.0275e-08	0.593057	2.055e-08	0.257114	0.249683				2.06e-08	0.834158	1.73822
1.03e-08	0.566088	2.06e-08	0.259111	0.263725				2.065e-08	0.227188	1.2842
1.0325e-08	0.561816	2.065e-08	0.255117	0.260452				2.07e-08	0.312704	-0.806654
1.035e-08	0.535915	2.07e-08	0.254618	0.248733				2.075e-08	-2.11046	2.49702
1.0375e-08	0.572497	2.075e-08	0.241538	0.264886				2.08e-08	-1.47401	-0.053485
1.04e-08	0.541255	2.08e-08	0.243834	0.250845				2.085e-08	-0.956429	-0.827122
1.0425e-08	0.550334	2.085e-08	0.245532	0.245988				2.09e-08	0.682725	1.27656
1.045e-08	0.557543	2.09e-08	0.252821	0.255912				2.095e-08	-0.358581	-0.425945
1.0475e-08	0.558879	2.095e-08	0.24673	0.246305				2.1e-08	0.323099	-0.255591
1.05e-08	0.560748	2.1e-08	0.249226	0.246305				2.105e-08	-0.0590691	-1.40859
1.0525e-08	0.565821	2.105e-08	0.24643	0.239548				2.11e-08	0.262687	-1.01159
1.055e-08	0.561282	2.11e-08	0.247129	0.240709				2.115e-08	-0.585542	1.31725
1.0575e-08	0.546328	2.115e-08	0.242037	0.251689				2.12e-08	-0.608071	1.22062
1.06e-08	0.55514	2.12e-08	0.241038	0.250317				2.125e-08	1.2119	-1.91949
1.0625e-08	0.547664	2.125e-08	0.249126	0.23353				2.13e-08	1.16896	-0.0427859
1.065e-08	0.551402	2.13e-08	0.248028	0.242188				2.135e-08	-1.70237	-0.146658
1.0675e-08	0.559947	2.135e-08	0.23305	0.240815				2.14e-08	2.11829	0.669976
1.07e-08	0.53725	2.14e-08	0.250924	0.244088				2.145e-08	-0.293387	1.32135
1.0725e-08	0.543391	2.145e-08	0.238243	0.246516				2.15e-08	-0.485169	0.398618
1.075e-08	0.557276	2.15e-08	0.236445	0.241026				2.155e-08	-1.55859	1.24104
1.0775e-08	0.543925	2.155e-08	0.230354	0.244405				2.16e-08	0.339696	1.03184
1.08e-08	0.551669	2.16e-08	0.238742	0.242504				2.165e-08	0.456139	0.652732
1.0825e-08	0.545527	2.165e-08	0.238442	0.239759				2.17e-08	1.00502	1.30877
1.085e-08	0.550334	2.17e-08	0.24024	0.242188				2.175e-08	-0.962938	-0.0699067
1.0875e-08	0.534846	2.175e-08	0.229855	0.234481				2.18e-08	0.677741	0.286678
1.09e-08	0.552737	2.18e-08	0.236945	0.235431				2.185e-08	0.500683	-0.0161772
1.0925e-08	0.526035	2.185e-08	0.235247	0.233108				2.19e-08	-0.0926717	0.148246
1.095e-08	0.530841	2.19e-08	0.231553	0.233108				2.195e-08	1.14038	0.462422
1.0975e-08	0.565554	2.195e-08	0.236645	0.233847				2.2e-08	-1.89055	-1.21172
1.1e-08	0.544993	2.2e-08	0.221268	0.224768				2.205e-08	0.553196	0.215153
1.1025e-08	0.539119	2.205e-08	0.232152	0.230997				2.21e-08	0.435511	0.509338
1.105e-08	0.542857	2.21e-08	0.230754	0.23163				2.215e-08	-0.729408	-0.550301
1.1075e-08	0.539653	2.215e-08	0.224363	0.225612				2.22e-08	-0.1374	0.647568
1.11e-08	0.519626	2.22e-08	0.22636	0.23068				2.225e-08	0.329286	1.50293
1.1125e-08	0.53004	2.225e-08	0.227758	0.234058				2.23e-08	2.05883	-0.991026
1.115e-08	0.529506	2.23e-08	0.235147	0.221073				2.235e-08	-0.065414	0.29494
1.1175e-08	0.526569	2.235e-08	0.224264	0.226562				2.24e-08	0.041116	0.0879878
1.12e-08	0.532176	2.24e-08	0.223964	0.224768				2.245e-08	0.401599	-0.57633
1.1225e-08	0.520961	2.245e-08	0.224863	0.220756				2.25e-08	1.03879	-0.960133
1.125e-08	0.510547	2.25e-08	0.227059	0.218117				2.255e-08	0.212756	0.813597
1.1275e-08	0.546328	2.255e-08	0.222366	0.225929				2.26e-08	0.511328	-1.64466
1.13e-08	0.532443	2.26e-08	0.222966	0.21326				2.265e-08	-1.40591	-0.93842
1.1325e-08	0.535648	2.265e-08	0.21318	0.215899				2.27e-08	0.128761	-0.997616
1.135e-08	0.51215	2.27e-08	0.219571	0.214844				2.275e-08	-1.04927	-0.553305
1.1375e-08	0.535113	2.275e-08	0.21328	0.216216				2.28e-08	-0.0900927	-0.900988
1.14e-08	0.524166	2.28e-08	0.216975	0.213788				2.285e-08	0.35604	-0.170985
1.1425e-08	0.535113	2.285e-08	0.218273	0.216533				2.29e-08	1.10418	0.538929
1.145e-08	0.542857	2.29e-08	0.220969	0.219172				2.295e-08	-2.0238	0.432744
1.1475e-08	0.505741	2.295e-08	0.205691	0.217905				2.3e-08	-0.60864	-0.493705
1.15e-08	0.516689	2.3e-08	0.211483	0.212732				2.305e-08	-0.291327	1.83903
1.1525e-08	0.522029	2.305e-08	0.212182	0.223079				2.31e-08	-0.211232	-0.689131
1.155e-08	0.529773	2.31e-08	0.211782	0.210304				2.315e-08	1.12784	-0.152754
1.1575e-08	0.530307	2.315e-08	0.217174	0.212099				2.32e-08	-0.203031	-1.37772
1.16e-08	0.515354	2.32e-08	0.210285	0.205553				2.325e-08	-0.603466	0.163166
1.1625e-08	0.534579	2.325e-08	0.207688	0.212099				2.33e-08	0.629595	-0.553462
1.165e-08	0.516956	2.33e-08	0.212581	0.207981				2.335e-08	1.5817	0.991763
1.1675e-08	0.533778	2.335e-08	0.216176	0.214527				2.34e-08	0.390394	-0.424
1.17e-08	0.506275	2.34e-08	0.209985	0.207137				2.345e-08	-0.673907	1.46364
1.1725e-08	0.506008	2.345e-08	0.204393	0.215266				2.35e-08	-0.90705	0.607008
1.175e-08	0.529773	2.35e-08	0.202596	0.210515				2.355e-08	-1.47139	1.89301
1.1775e-08	0.49239	2.355e-08	0.199301	0.215794				2.36e-08	-0.383535	1.16975
1.18e-08	0.509746	2.36e-08	0.203495	0.211677				2.365e-08	-0.286205	0.375805
1.1825e-08	0.521228	2.365e-08	0.203195	0.207242				2.37e-08	0.0766554	-0.625884
1.185e-08	0.522563	2.37e-08	0.204094	0.201858				2.375e-08	1.34878	-1.04106
1.1875e-08	0.490521	2.375e-08	0.209086	0.199219				2.38e-08	1.2464	-2.68959
1.19e-08	0.515087	2.38e-08	0.207888	0.190878				2.385e-08	-1.66193	0.608337
1.1925e-08	0.512684	2.385e-08	0.194109	0.205448				2.39e-08	-0.813169	0.464542
1.195e-08	0.509479	2.39e-08	0.197204	0.204075				2.395e-08	-0.76584	1.32781
1.1975e-08	0.523097	2.395e-08	0.196705	0.207348				2.4e-08	0.870241	0.358332
1.2e-08	0.486782	2.4e-08	0.203295	0.202175				2.405e-08	1.36885	1.77587
1.2025e-08	0.513218	2.405e-08	0.204793	0.207981				2.41e-08	0.656486	1.72468
1.205e-08	0.512951	2.41e-08	0.200899	0.207031				2.415e-08	-0.306022	0.104664
1.2075e-08	0.503605	2.415e-08	0.195906	0.198902				2.42e-08	0.124941	0.650441
1.21e-08	0.499599	2.42e-08	0.197104	0.200697				2.425e-08	-1.36312	0.895873
1.2125e-08	0.510814	2.425e-08	0.189815	0.201119				2.43e-08	0.761161	0.537827
1.215e-08	0.503605	2.43e-08	0.198502	0.198796				2.435e-08	1.75886	-0.217317
1.2175e-08	0.487316	2.435e-08	0.202197	0.194679				2.44e-08	-0.07819	0.14129
1.22e-08	0.520427	2.44e-08	0.19341	0.195629				2.445e-08	0.465737	-0.66458
1.2225e-08	0.484112	2.445e-08	0.195107	0.191301				2.45e-08	-2.26925	0.137749
1.225e-08	0.500935	2.45e-08	0.182426	0.194257				2.455e-08	1.58185	-0.0162207
1.2275e-08	0.498798	2.455e-08	0.198602	0.192884				2.46e-08	0.233623	1.00082
1.23e-08	0.47984	2.46e-08	0.192012	0.196791				2.465e-08	0.987798	-0.208644
1.2325e-08	0.492123	2.465e-08	0.194608	0.190667				2.47e-08	1.05582	-0.52937
1.235e-08	0.486782	2.47e-08	0.194209	0.188556				2.475e-08	-0.601367	1.00839
1.2375e-08	0.476903	2.475e-08	0.186321	0.194785				2.48e-08	-1.29878	0.591567
1.24e-08	0.477704	2.48e-08	0.182626	0.192251				2.485e-08	-0.546307	0.36145
1.2425e-08	0.490521	2.485e-08	0.185222	0.190562				2.49e-08	-0.0460261	-0.840819
1.245e-08	0.509746	2.49e-08	0.18672	0.184544				2.495e-08	-1.65129	-0.197353
1.2475e-08	0.505207	2.495e-08	0.179131	0.186761				2.5e-08	0.448782	0.757117
1.25e-08	0.489186	2.5e-08	0.187519	0.190351				2.505e-08	-0.39479	-0.855881
1.2525e-08	0.48251	2.505e-08	0.183225	0.182538				2.51e-08	-0.100792	-0.829296
1.255e-08	0.494259	2.51e-08	0.183824	0.18201				2.515e-08	1.22031	1.03655
1.2575e-08	0.499332	2.515e-08	0.188817	0.189611				2.52e-08	-1.47272	2.07091
1.26e-08	0.476636	2.52e-08	0.176635	0.193518				2.525e-08	-0.853161	-1.27904
1.2625e-08	0.478505	2.525e-08	0.178632	0.178104				2.53e-08	0.0719463	0.160426
1.265e-08	0.493458	2.53e-08	0.181927	0.183805				2.535e-08	0.318081	-0.151965
1.2675e-08	0.520427	2.535e-08	0.182327	0.181799				2.54e-08	0.84683	-0.658711
1.27e-08	0.503872	2.54e-08	0.183924	0.178948				2.545e-08	-0.155101	0.353208
1.2725e-08	0.484646	2.545e-08	0.179031	0.182749				2.55e-08	-0.452326	1.34434
1.275e-08	0.476636	2.55e-08	0.177134	0.186444				2.555e-08	0.0536561	0.570652
1.2775e-08	0.480908	2.555e-08	0.178632	0.182432				2.56e-08	0.0162991	-0.885193
1.28e-08	0.480107	2.56e-08	0.177833	0.175465				2.565e-08	-0.947251	-1.37399
1.2825e-08	0.498798	2.565e-08	0.17314	0.17272				2.57e-08	-2.20015	-0.233596
1.285e-08	0.477971	2.57e-08	0.167249	0.177048				2.575e-08	0.85424	-0.919879
1.2875e-08	0.483578	2.575e-08	0.179431	0.173459				2.58e-08	-1.90651	0.222715
1.29e-08	0.478505	2.58e-08	0.167249	0.177787				2.585e-08	0.726369	-0.491882
1.2925e-08	0.470761	2.585e-08	0.177634	0.174092				2.59e-08	0.0140958	0.21268
1.295e-08	0.471028	2.59e-08	0.174039	0.17652				2.595e-08	-0.365047	-0.112158
1.2975e-08	0.499065	2.595e-08	0.171842	0.174514				2.6e-08	0.624703	-2.01297
1.3e-08	0.468625	2.6e-08	0.175337	0.165752				2.605e-08	-0.911043	-0.716277
1.3025e-08	0.470761	2.605e-08	0.168347	0.170714				2.61e-08	-1.34245	-0.52619
1.305e-08	0.475567	2.61e-08	0.165951	0.170925				2.615e-08	-0.494362	-0.63236
1.3075e-08	0.485447	2.615e-08	0.168847	0.169869				2.62e-08	0.307936	-1.25975
1.31e-08	0.49773	2.62e-08	0.171543	0.166596				2.625e-08	-1.45958	-0.649512
1.3125e-08	0.491856	2.625e-08	0.163655	0.168602				2.63e-08	0.969539	1.60258
1.315e-08	0.470761	2.63e-08	0.17304	0.177576				2.635e-08	0.728188	0.573847
1.3175e-08	0.48251	2.635e-08	0.171443	0.172614				2.64e-08	0.0951334	-1.60664
1.32e-08	0.477704	2.64e-08	0.168248	0.162796				2.645e-08	-0.711522	0.304003
1.3225e-08	0.456876	2.645e-08	0.164353	0.170291				2.65e-08	-1.71703	1.62027
1.325e-08	0.487583	2.65e-08	0.159661	0.175253				2.655e-08	-0.592935	-0.946428
1.3275e-08	0.482777	2.655e-08	0.163655	0.163851				2.66e-08	-0.349183	-0.808711
1.33e-08	0.455808	2.66e-08	0.164054	0.163851				2.665e-08	-0.867508	0.00892794
1.3325e-08	0.480908	2.665e-08	0.161358	0.166702				2.67e-08	1.20049	0.0977599
1.335e-08	0.453405	2.67e-08	0.169146	0.166491				2.675e-08	1.20015	0.286725
1.3375e-08	0.465955	2.675e-08	0.168547	0.166702				2.68e-08	1.22312	1.46177
1.34e-08	0.471295	2.68e-08	0.168048	0.17103				2.685e-08	-0.440318	-0.147848
1.3425e-08	0.495594	2.685e-08	0.160759	0.163746				2.69e-08	-0.223195	0.826069
1.345e-08	0.468625	2.69e-08	0.161058	0.16723				2.695e-08	-1.82142	-1.60476
1.3475e-08	0.463551	2.695e-08	0.154069	0.156567				2.7e-08	0.387042	0.312265
1.35e-08	0.449132	2.7e-08	0.162356	0.163957				2.705e-08	-2.5391	-0.622406
1.3525e-08	0.458211	2.705e-08	0.150075	0.159523				2.71e-08	-0.424163	1.22622
1.355e-08	0.482777	2.71e-08	0.157963	0.166596				2.715e-08	1.37262	-0.581018
1.3575e-08	0.458478	2.715e-08	0.164553	0.158573				2.72e-08	-0.237897	0.709149
1.36e-08	0.453939	2.72e-08	0.157564	0.163323				2.725e-08	-0.0198895	0.512065
1.3625e-08	0.465955	2.725e-08	0.157863	0.161951				2.73e-08	2.56522	-1.5663
1.365e-08	0.451802	2.73e-08	0.167549	0.152872				2.735e-08	1.32306	0.834525
1.3675e-08	0.466489	2.735e-08	0.162057	0.162162				2.74e-08	-0.884665	0.220704
1.37e-08	0.474232	2.74e-08	0.152771	0.159101				2.745e-08	0.11547	-0.680126
1.3725e-08	0.443258	2.745e-08	0.156166	0.154878				2.75e-08	-0.0479135	-1.11759
1.375e-08	0.463551	2.75e-08	0.154968	0.152555				2.755e-08	-0.0340626	-0.362131
1.3775e-08	0.439252	2.755e-08	0.154468	0.155089				2.76e-08	-0.631236	-0.696635
1.38e-08	0.44486	2.76e-08	0.151573	0.153188				2.765e-08	-1.17962	-1.21483
1.3825e-08	0.448865	2.765e-08	0.148877	0.150549				2.77e-08	-0.0440135	0.300825
1.385e-08	0.433912	2.77e-08	0.152771	0.156144				2.775e-08	-0.876404	2.21286
1.3875e-08	0.449132	2.775e-08	0.148977	0.163323				2.78e-08	0.0049307	0.593931
1.39e-08	0.46008	2.78e-08	0.151872	0.15625				2.785e-08	-0.550126	0.018176
1.3925e-08	0.44219	2.785e-08	0.149176	0.153399				2.79e-08	0.153232	1.22741
1.395e-08	0.437116	2.79e-08	0.151373	0.157728				2.795e-08	0.162749	0.307772
1.3975e-08	0.446195	2.795e-08	0.150874	0.153505				2.8e-08	-1.42903	-1.51198
1.4e-08	0.449666	2.8e-08	0.144184	0.145693				2.805e-08	-0.672251	0.149663
1.4025e-08	0.441121	2.805e-08	0.14658	0.151816				2.81e-08	-1.15688	-1.12098
1.405e-08	0.45287	2.81e-08	0.144184	0.14622				2.815e-08	-0.163331	0.891707
1.4075e-08	0.426969	2.815e-08	0.147479	0.153716				2.82e-08	-0.571221	-0.010808
1.41e-08	0.452069	2.82e-08	0.145382	0.149599				2.825e-08	-1.34649	0.652248
1.4125e-08	0.432043	2.825e-08	0.141887	0.15171				2.83e-08	-0.0374667	-0.256188
1.415e-08	0.440854	2.83e-08	0.14638	0.147593				2.835e-08	1.17064	-1.32878
1.4175e-08	0.45741	2.835e-08	0.150474	0.142842				2.84e-08	0.601043	-0.372829
1.42e-08	0.436315	2.84e-08	0.147778	0.146115				2.845e-08	0.65899	-0.217556
1.4225e-08	0.439786	2.845e-08	0.147479	0.14622				2.85e-08	-1.78064	-0.303409
1.425e-08	0.436849	2.85e-08	0.137693	0.145376				2.855e-08	0.564446	1.25036
1.4275e-08	0.43231	2.855e-08	0.146081	0.150971				2.86e-08	-2.01614	0.547226
1.43e-08	0.445394	2.86e-08	0.135796	0.147698				2.865e-08	-0.456158	-2.37075
1.4325e-08	0.452603	2.865e-08	0.141188	0.135769				2.87e-08	-0.32087	-0.786025
1.435e-08	0.428571	2.87e-08	0.141188	0.14147				2.875e-08	-1.43297	1.20923
1.4375e-08	0.423231	2.875e-08	0.136495	0.148754				2.88e-08	-2.41747	0.0371586
1.44e-08	0.443792	2.88e-08	0.132302	0.143687				2.885e-08	0.00123384	0.137078
1.4425e-08	0.444593	2.885e-08	0.140889	0.143581				2.89e-08	0.747809	-1.04213
1.445e-08	0.436849	2.89e-08	0.143185	0.138514				2.895e-08	1.4166	0.773034
1.4475e-08	0.429372	2.895e-08	0.145182	0.145059				2.9e-08	-0.535266	-0.600641
1.45e-08	0.41522	2.9e-08	0.137394	0.139253				2.905e-08	-0.778199	0.865791
1.4525e-08	0.442457	2.905e-08	0.135996	0.144426				2.91e-08	0.401542	0.501298
1.455e-08	0.423765	2.91e-08	0.13989	0.142525				2.915e-08	0.240027	-0.523382
1.4575e-08	0.442991	2.915e-08	0.138792	0.138091				2.92e-08	-1.75552	0.482795
1.46e-08	0.425901	2.92e-08	0.130904	0.14147				2.925e-08	0.372526	-1.18062
1.4625e-08	0.423231	2.925e-08	0.138293	0.134607				2.93e-08	0.531997	-1.82997
1.465e-08	0.439252	2.93e-08	0.138392	0.131651				2.935e-08	0.718196	-0.934413
1.4675e-08	0.429105	2.935e-08	0.138592	0.134607				2.94e-08	-1.29459	0.240703
1.47e-08	0.441389	2.94e-08	0.130704	0.138619				2.945e-08	0.438472	-0.0781304
1.4725e-08	0.420828	2.945e-08	0.136595	0.13693				2.95e-08	1.55091	-0.56489
1.475e-08	0.424833	2.95e-08	0.14019	0.134607				2.955e-08	0.210722	-1.19257
1.4775e-08	0.45474	2.955e-08	0.134798	0.131757				2.96e-08	0.150841	-0.986024
1.48e-08	0.4251	2.96e-08	0.134099	0.132073				2.965e-08	-1.08721	-1.36539
1.4825e-08	0.423765	2.965e-08	0.129106	0.130173				2.97e-08	0.0573722	-0.963125
1.485e-08	0.414152	2.97e-08	0.132801	0.131229				2.975e-08	-1.29667	-0.672621
1.4875e-08	0.414419	2.975e-08	0.127409	0.131862				2.98e-08	-0.398502	-0.550704
1.49e-08	0.4251	2.98e-08	0.130205	0.131862				2.985e-08	-1.23616	-0.597875
1.4925e-08	0.438184	2.985e-08	0.12671	0.131229				2.99e-08	-1.33109	0.199557
1.495e-08	0.408278	2.99e-08	0.125911	0.133763				2.995e-08	-0.789828	0.265779
1.4975e-08	0.424299	2.995e-08	0.127409	0.133552				3e-08	-0.967918	0.64309
1.5e-08	0.416555	3e-08	0.126311	0.134502				3.005e-08	-1.34121	-0.167754
1.5025e-08	0.411749	3.005e-08	0.124513	0.131018				3.01e-08	-0.797327	-1.35025
1.505e-08	0.41522	3.01e-08	0.126011	0.126161				3.015e-08	0.306151	-0.94556
1.5075e-08	0.435781	3.015e-08	0.129506	0.127217				3.02e-08	1.63672	-0.482965
1.51e-08	0.41522	3.02e-08	0.133799	0.128484				3.025e-08	-0.80701	0.322401
1.5125e-08	0.414686	3.025e-08	0.124613	0.131018				3.03e-08	-2.22339	-0.89876
1.515e-08	0.424032	3.03e-08	0.119121	0.126056				3.035e-08	0.426636	-1.58119
1.5175e-08	0.406943	3.035e-08	0.128108	0.1231				3.04e-08	1.31305	-2.06573
1.52e-08	0.394393	3.04e-08	0.130804	0.120883				3.045e-08	1.61047	1.12323
1.5225e-08	0.403738	3.045e-08	0.131403	0.132179				3.05e-08	-0.208778	0.238697
1.525e-08	0.428571	3.05e-08	0.124513	0.128484				3.055e-08	0.90706	-1.45574
1.5275e-08	0.422697	3.055e-08	0.128008	0.121833				3.06e-08	-0.5517	-1.04907
1.53e-08	0.40721	3.06e-08	0.122416	0.122889				3.065e-08	-1.36287	0.891336
1.5325e-08	0.40534	3.065e-08	0.119121	0.12954				3.07e-08	-1.66543	0.115456
1.535e-08	0.416021	3.07e-08	0.117624	0.126267				3.075e-08	-1.34331	0.612475
1.5375e-08	0.409079	3.075e-08	0.118323	0.127639				3.08e-08	-1.10686	-0.19779
1.54e-08	0.39012	3.08e-08	0.118722	0.124261				3.085e-08	-0.55595	-0.109042
1.5425e-08	0.422964	3.085e-08	0.12022	0.124155				3.09e-08	-0.776881	0.912867
1.545e-08	0.391188	3.09e-08	0.119021	0.127428				3.095e-08	-0.654563	0.5358
1.5475e-08	0.416021	3.095e-08	0.119021	0.125633				3.1e-08	-0.503199	1.06454
1.55e-08	0.421896	3.1e-08	0.119121	0.127111				3.105e-08	-1.56068	-0.281149
1.5525e-08	0.386649	3.105e-08	0.115027	0.121833				3.11e-08	-0.718233	0.247913
1.555e-08	0.408011	3.11e-08	0.117524	0.123311				3.115e-08	-2.12676	-1.39819
1.5575e-08	0.417356	3.115e-08	0.112232	0.116976				3.12e-08	-1.71694	0.574236
1.56e-08	0.397063	3.12e-08	0.11323	0.123628				3.125e-08	-0.436612	0.51562
1.5625e-08	0.414686	3.125e-08	0.117224	0.122994				3.13e-08	-1.33177	0.041719
1.565e-08	0.402403	3.13e-08	0.113729	0.120883				3.135e-08	-0.746705	-0.404917
1.5675e-08	0.403204	3.135e-08	0.115327	0.118877				3.14e-08	-0.0142912	-2.51515
1.57e-08	0.397063	3.14e-08	0.117424	0.110959				3.145e-08	-0.944289	-2.0766
1.5725e-08	0.415754	3.145e-08	0.113829	0.11212				3.15e-08	-1.05849	0.358273
1.575e-08	0.41255	3.15e-08	0.11303	0.120355				3.155e-08	1.28889	-1.43385
1.5775e-08	0.404272	3.155e-08	0.120619	0.113598				3.16e-08	-1.40575	0.0842586
1.58e-08	0.415754	3.16e-08	0.111033	0.11856				3.165e-08	-0.874437	-1.35554
1.5825e-08	0.401869	3.165e-08	0.112431	0.11307				3.17e-08	0.896102	0.977014
1.585e-08	0.389052	3.17e-08	0.118023	0.120883				3.175e-08	-1.10663	0.0128954
1.5875e-08	0.391722	3.175e-08	0.110834	0.117082				3.18e-08	-1.87558	1.03006
1.59e-08	0.392256	3.18e-08	0.107838	0.120249				3.185e-08	-1.2557	-0.240454
1.5925e-08	0.39012	3.185e-08	0.109536	0.115393				3.19e-08	-0.634114	0.416401
1.595e-08	0.408812	3.19e-08	0.111233	0.117293				3.195e-08	-1.55655	0.379773
1.5975e-08	0.387183	3.195e-08	0.107738	0.116765				3.2e-08	0.763976	1.79701
1.6e-08	0.376235	3.2e-08	0.115127	0.121305				3.205e-08	0.795313	0.791413
1.6025e-08	0.391722	3.205e-08	0.114828	0.117399				3.21e-08	-0.30908	-3.28797
1.605e-08	0.400267	3.21e-08	0.110734	0.102829				3.215e-08	0.199436	-0.865001
1.6075e-08	0.391188	3.215e-08	0.112032	0.110853				3.22e-08	2.20928	-2.12505
1.61e-08	0.385314	3.22e-08	0.118323	0.106102				3.225e-08	-1.39406	-0.701381
1.6125e-08	0.377837	3.225e-08	0.105941	0.110642				3.23e-08	-1.48923	0.848613
1.615e-08	0.395995	3.23e-08	0.105242	0.115604				3.235e-08	-1.16337	-1.52155
1.6175e-08	0.4	3.235e-08	0.105941	0.107052				3.24e-08	0.945582	-0.398723
1.62e-08	0.392256	3.24e-08	0.112531	0.110536				3.245e-08	-0.630423	-1.08752
1.6225e-08	0.389052	3.245e-08	0.10694	0.107791				3.25e-08	-2.39405	0.625231
1.625e-08	0.397063	3.25e-08	0.100749	0.113281				3.255e-08	-1.00539	0.429651
1.6275e-08	0.409346	3.255e-08	0.104943	0.112226				3.26e-08	-0.28118	-0.416123
1.63e-08	0.388518	3.26e-08	0.10694	0.108953				3.265e-08	0.171238	-0.366462
1.6325e-08	0.389853	3.265e-08	0.108038	0.108742				3.27e-08	-0.474302	0.365748
1.635e-08	0.398665	3.27e-08	0.105542	0.110853				3.275e-08	0.712283	-1.35649
1.6375e-08	0.385581	3.275e-08	0.109036	0.104624				3.28e-08	-0.947888	0.153138
1.64e-08	0.401335	3.28e-08	0.103245	0.109375				3.285e-08	0.485715	-1.98265
1.6425e-08	0.392523	3.285e-08	0.107539	0.101774				3.29e-08	2.07768	-0.157462
1.645e-08	0.385314	3.29e-08	0.112332	0.10758				3.295e-08	-0.298991	-0.517403
1.6475e-08	0.390387	3.295e-08	0.104244	0.105997				3.3e-08	0.58706	-0.721898
1.65e-08	0.374633	3.3e-08	0.10674	0.104941				3.305e-08	-1.80088	0.674816
1.6525e-08	0.382109	3.305e-08	0.098652	0.109269				3.31e-08	-0.883486	0.0625339
1.655e-08	0.402403	3.31e-08	0.101248	0.106841				3.315e-08	0.750746	-1.62365
1.6575e-08	0.38024	3.315e-08	0.106141	0.100823				3.32e-08	-0.562291	-0.095432
1.66e-08	0.40988	3.32e-08	0.101548	0.105574				3.325e-08	-1.16476	1.5953
1.6625e-08	0.366355	3.325e-08	0.0992511	0.110853				3.33e-08	-1.42735	2.11854
1.665e-08	0.379172	3.33e-08	0.0980529	0.112226				3.335e-08	-0.629221	-0.721383
1.6675e-08	0.37757	3.335e-08	0.10025	0.102407				3.34e-08	-0.454795	-0.201381
1.67e-08	0.375968	3.34e-08	0.100449	0.10378				3.345e-08	-0.0291211	0.925329
1.6725e-08	0.383178	3.345e-08	0.101448	0.107158				3.35e-08	-0.355993	-0.879182
1.675e-08	0.382377	3.35e-08	0.10005	0.100823				3.355e-08	-1.87994	-0.293179
1.6775e-08	0.375434	3.355e-08	0.0948577	0.102407				3.36e-08	-1.32865	-0.601538
1.68e-08	0.373298	3.36e-08	0.0962556	0.101035				3.365e-08	0.235189	-0.71864
1.6825e-08	0.377303	3.365e-08	0.100849	0.100296				3.37e-08	0.412199	0.641165
1.685e-08	0.386115	3.37e-08	0.101048	0.104413				3.375e-08	-0.61548	-0.119085
1.6875e-08	0.370093	3.375e-08	0.0974538	0.101562				3.38e-08	-0.346073	-0.302714
1.69e-08	0.376235	3.38e-08	0.0979531	0.100612				3.385e-08	-0.267342	0.933127
1.6925e-08	0.3749	3.385e-08	0.0978532	0.104307				3.39e-08	1.11763	-1.44983
1.695e-08	0.387984	3.39e-08	0.101847	0.0961782				3.395e-08	0.240938	0.694973
1.6975e-08	0.361282	3.395e-08	0.0987519	0.102829				3.4e-08	-1.72619	1.22423
1.7e-08	0.366622	3.4e-08	0.0922616	0.104202				3.405e-08	-1.16971	-0.390566
1.7025e-08	0.371429	3.405e-08	0.0936595	0.0986064				3.41e-08	-0.643383	-0.7408
1.705e-08	0.36502	3.41e-08	0.0949576	0.0971284				3.415e-08	-0.693897	-0.276695
1.7075e-08	0.385581	3.415e-08	0.0944583	0.0982897				3.42e-08	0.929793	1.36519
1.71e-08	0.386649	3.42e-08	0.0991513	0.103252				3.425e-08	-1.66806	-1.01498
1.7125e-08	0.380507	3.425e-08	0.0907639	0.095228				3.43e-08	-0.430083	0.760622
1.715e-08	0.370093	3.43e-08	0.0942586	0.100612				3.435e-08	-0.548339	-0.710574
1.7175e-08	0.365287	3.435e-08	0.0935597	0.0955448				3.44e-08	-0.0836371	-0.0811087
1.72e-08	0.373031	3.44e-08	0.094658	0.097234				3.445e-08	-0.234863	-0.702272
1.7225e-08	0.359947	3.445e-08	0.0938592	0.0949113				3.45e-08	-0.549484	0.523469
1.725e-08	0.36502	3.45e-08	0.0925612	0.0985008				3.455e-08	-1.02832	0.198757
1.7275e-08	0.358611	3.455e-08	0.0907639	0.0971284				3.46e-08	-0.594271	1.2314
1.73e-08	0.366889	3.46e-08	0.0917624	0.100084				3.465e-08	-0.15873	1.07264
1.7325e-08	0.361282	3.465e-08	0.0927609	0.0992399				3.47e-08	0.0813728	-0.0845356
1.735e-08	0.365287	3.47e-08	0.0931603	0.095228				3.475e-08	-0.269656	0.385435
1.7375e-08	0.372497	3.475e-08	0.0917624	0.0963894				3.48e-08	-0.754566	-1.61287
1.74e-08	0.37223	3.48e-08	0.0899651	0.0897382				3.485e-08	-0.286197	-0.176275
1.7425e-08	0.359413	3.485e-08	0.0910634	0.0939611				3.49e-08	-2.72192	-0.442501
1.745e-08	0.360481	3.49e-08	0.0833749	0.0927998				3.495e-08	-0.106273	1.00052
1.7475e-08	0.346595	3.495e-08	0.0909636	0.0970228				3.5e-08	-0.695256	-0.30626
1.75e-08	0.36502	3.5e-08	0.0888667	0.0925887				3.505e-08	-0.191099	-1.65124
1.7525e-08	0.375701	3.505e-08	0.0900649	0.088049				3.51e-08	-1.61367	-1.11317
1.755e-08	0.376502	3.51e-08	0.0854718	0.0894215				3.515e-08	-0.310029	1.18262
1.7575e-08	0.360748	3.515e-08	0.0890664	0.0962838				3.52e-08	0.43071	-0.30257
1.76e-08	0.342857	3.52e-08	0.0909636	0.0913218				3.525e-08	-0.331018	1.59473
1.7625e-08	0.357009	3.525e-08	0.0883674	0.0969172				3.53e-08	-1.59878	-0.677389
1.765e-08	0.373565	3.53e-08	0.0842736	0.089527				3.535e-08	-0.523511	0.306192
1.7675e-08	0.346328	3.535e-08	0.0871692	0.092272				3.54e-08	-0.822699	0.0326053
1.77e-08	0.343925	3.54e-08	0.085971	0.0911106				3.545e-08	-0.281542	-0.0714964
1.7725e-08	0.365821	3.545e-08	0.0872691	0.0904772				3.55e-08	-1.12128	-0.0393408
1.775e-08	0.359947	3.55e-08	0.0844733	0.090266				3.555e-08	-0.714038	0.0271115
1.7775e-08	0.366622	3.555e-08	0.0853719	0.0901605				3.56e-08	-0.779206	0.539588
1.78e-08	0.353271	3.56e-08	0.0848727	0.0914274				3.565e-08	-1.62447	1.12247
1.7825e-08	0.348999	3.565e-08	0.0820769	0.0929054				3.57e-08	1.02539	0.984334
1.785e-08	0.357009	3.57e-08	0.0895657	0.0921664				3.575e-08	-0.535343	1.01722
1.7875e-08	0.350067	3.575e-08	0.084673	0.0919552				3.58e-08	1.57869	0.531307
1.79e-08	0.367957	3.58e-08	0.0905642	0.0901605				3.585e-08	-0.637123	-0.441155
1.7925e-08	0.359146	3.585e-08	0.0837743	0.0868877				3.59e-08	-0.77458	-0.58568
1.795e-08	0.344459	3.59e-08	0.0830754	0.0861486				3.595e-08	1.48593	-1.42505
1.7975e-08	0.344459	3.595e-08	0.089366	0.0832981				3.6e-08	-1.60073	-1.39817
1.8e-08	0.33725	3.6e-08	0.0800799	0.083087				3.605e-08	-0.2967	0.718483
1.8025e-08	0.331642	3.605e-08	0.0835746	0.0892103				3.61e-08	-0.15935	-0.332484
1.805e-08	0.362083	3.61e-08	0.0836745	0.0857264				3.615e-08	0.634146	0.395255
1.8075e-08	0.36502	3.615e-08	0.0856715	0.0876267				3.62e-08	-0.989896	-0.135198
1.81e-08	0.351402	3.62e-08	0.080679	0.0857264				3.625e-08	0.808246	-0.773532
1.8125e-08	0.350334	3.625e-08	0.0855716	0.0835093				3.63e-08	0.877006	-1.30956
1.815e-08	0.33992	3.63e-08	0.0854718	0.081609				3.635e-08	-0.479734	-0.158873
1.8175e-08	0.350601	3.635e-08	0.0812781	0.0847762				3.64e-08	-0.448961	-0.767108
1.82e-08	0.350601	3.64e-08	0.0810784	0.0826647				3.645e-08	1.22103	-1.58945
1.8225e-08	0.339386	3.645e-08	0.0855716	0.0799198				3.65e-08	-0.911728	0.41502
1.825e-08	0.33992	3.65e-08	0.0791812	0.0856208				3.655e-08	0.203158	-3.27828
1.8275e-08	0.334312	3.655e-08	0.0820769	0.0743243				3.66e-08	-0.29102	-0.0276195
1.83e-08	0.33725	3.66e-08	0.0803794	0.0837204				3.665e-08	0.126306	-0.641283
1.8325e-08	0.340187	3.665e-08	0.0812781	0.081609				3.67e-08	0.122556	2.01931
1.835e-08	0.358879	3.67e-08	0.0809785	0.0892103				3.675e-08	-0.869089	2.08377
1.8375e-08	0.316155	3.675e-08	0.0778832	0.0891047				3.68e-08	0.748122	-0.461424
1.84e-08	0.355674	3.68e-08	0.0821767	0.0812922				3.685e-08	0.318441	-0.545704
1.8425e-08	0.357276	3.685e-08	0.080679	0.0807644				3.69e-08	-1.95603	-2.20849
1.845e-08	0.351669	3.69e-08	0.073989	0.0755912				3.695e-08	0.305558	1.36759
1.8475e-08	0.343658	3.695e-08	0.0800799	0.0858319				3.7e-08	-1.79946	-0.333849
1.85e-08	0.323364	3.7e-08	0.0738892	0.0805532				3.705e-08	-0.562954	-1.75281
1.8525e-08	0.335915	3.705e-08	0.0770844	0.0761191				3.71e-08	-1.3565	0.325813
1.855e-08	0.330307	3.71e-08	0.0745881	0.0819257				3.715e-08	-1.36632	-0.337433
1.8575e-08	0.330307	3.715e-08	0.0742886	0.0797086				3.72e-08	0.163766	0.518491
1.86e-08	0.324967	3.72e-08	0.0782826	0.0819257				3.725e-08	0.586163	0.360273
1.8625e-08	0.3247	3.725e-08	0.0791812	0.0811867				3.73e-08	-1.29144	-1.07189
1.865e-08	0.326035	3.73e-08	0.0736895	0.0767525				3.735e-08	-0.727723	0.404082
1.8675e-08	0.34526	3.735e-08	0.0749875	0.0807644				3.74e-08	-2.83179	-0.0122993
1.87e-08	0.333244	3.74e-08	0.0688967	0.0792863				3.745e-08	-1.11304	1.87206
1.8725e-08	0.342857	3.745e-08	0.0733899	0.0844595				3.75e-08	-0.510519	-0.0443726
1.875e-08	0.338852	3.75e-08	0.0747878	0.0786529				3.755e-08	-0.0872405	0.599487
1.8775e-08	0.341255	3.755e-08	0.0756865	0.0802365				3.76e-08	-1.18829	-1.10541
1.88e-08	0.340988	3.76e-08	0.0723914	0.0750633				3.765e-08	-0.582834	0.78984
1.8825e-08	0.341789	3.765e-08	0.0737893	0.0802365				3.77e-08	-0.595275	0.369086
1.885e-08	0.313485	3.77e-08	0.0734898	0.0787584				3.775e-08	-1.48508	-1.01395
1.8875e-08	0.343925	3.775e-08	0.0707938	0.0745355				3.78e-08	-1.3179	-0.220314
1.89e-08	0.341522	3.78e-08	0.0709935	0.0765414				3.785e-08	-2.10376	-1.12886
1.8925e-08	0.326035	3.785e-08	0.0685971	0.0736909				3.79e-08	-1.46082	0.148902
1.895e-08	0.329773	3.79e-08	0.0700949	0.0770693				3.795e-08	0.140487	0.315561
1.8975e-08	0.325768	3.795e-08	0.0741887	0.0772804				3.8e-08	0.236664	-1.75175
1.9e-08	0.334312	3.8e-08	0.0741887	0.0711571				3.805e-08	0.185486	0.762303
1.9025e-08	0.328438	3.805e-08	0.0737893	0.0780194				3.81e-08	1.53922	-0.750894
1.905e-08	0.33004	3.81e-08	0.0771842	0.0734797				3.815e-08	0.712197	0.0515118
1.9075e-08	0.338585	3.815e-08	0.074688	0.0754856				3.82e-08	-0.600457	0.96886
1.91e-08	0.348732	3.82e-08	0.0708937	0.0778083				3.825e-08	0.386301	2.60229
1.9125e-08	0.346862	3.825e-08	0.0732901	0.0821368				3.83e-08	0.332904	0.853985
1.915e-08	0.330307	3.83e-08	0.0728907	0.0769637				3.835e-08	-1.47473	-1.50392
1.9175e-08	0.327904	3.835e-08	0.0677983	0.0701014				3.84e-08	-0.673094	-0.774204
1.92e-08	0.311615	3.84e-08	0.0696955	0.0718961				3.845e-08	-0.655017	-0.647265
1.9225e-08	0.311615	3.845e-08	0.0694958	0.0720017				3.85e-08	2.06327	0.0861905
1.925e-08	0.32737	3.85e-08	0.0764853	0.0737965				3.855e-08	0.470602	2.07448
1.9275e-08	0.320961	3.855e-08	0.071992	0.0790752				3.86e-08	0.114258	-0.188162
1.93e-08	0.332977	3.86e-08	0.0707938	0.0725296				3.865e-08	-0.922066	-1.0116
1.9325e-08	0.311081	3.865e-08	0.0677983	0.0699958				3.87e-08	-1.81126	-0.350459
1.935e-08	0.319092	3.87e-08	0.0652022	0.0715794				3.875e-08	-0.8503	0.885389
1.9375e-08	0.326569	3.875e-08	0.0674988	0.0747466				3.88e-08	-0.720717	-2.23906
1.94e-08	0.306275	3.88e-08	0.0675986	0.0658784				3.885e-08	-0.47741	1.37372
1.9425e-08	0.32737	3.885e-08	0.067998	0.0755912				3.89e-08	-0.690077	-1.07006
1.945e-08	0.32737	3.89e-08	0.0671992	0.0686233				3.895e-08	0.582403	0.0557852
1.9475e-08	0.327103	3.895e-08	0.0702946	0.0714738				3.9e-08	1.05766	-0.0478848
1.95e-08	0.328972	3.9e-08	0.0712931	0.0709459				3.905e-08	-0.41566	0.0024717
1.9525e-08	0.319626	3.905e-08	0.0671992	0.0708404				3.91e-08	-1.39625	-1.06854
1.955e-08	0.325501	3.91e-08	0.0644034	0.0676731				3.915e-08	-0.384837	-1.01987
1.9575e-08	0.323097	3.915e-08	0.0667998	0.0675676				3.92e-08	0.168592	-0.505664
1.96e-08	0.322029	3.92e-08	0.067998	0.0687289				3.925e-08	-1.24086	-1.54536
1.9625e-08	0.318291	3.925e-08	0.0641038	0.0656672				3.93e-08	-0.14846	0.0195472
1.965e-08	0.332176	3.93e-08	0.0667	0.0696791				3.935e-08	-1.68091	-0.0489926
1.9675e-08	0.303605	3.935e-08	0.0625062	0.0692568				3.94e-08	-1.12846	0.663391
1.97e-08	0.32283	3.94e-08	0.0637044	0.0709459				3.945e-08	0.278996	-0.539761
1.9725e-08	0.306809	3.945e-08	0.0670994	0.067462				3.95e-08	0.37034	0.526855
1.975e-08	0.300134	3.95e-08	0.0670994	0.0701014				3.955e-08	-0.705673	-0.523683
1.9775e-08	0.314286	3.955e-08	0.0641038	0.0670397				3.96e-08	-0.771791	-0.948406
1.98e-08	0.309479	3.96e-08	0.0637044	0.0656672				3.965e-08	-0.291358	0.79284
1.9825e-08	0.306008	3.965e-08	0.0647029	0.0701014				3.97e-08	-0.709435	1.27652
1.985e-08	0.313752	3.97e-08	0.0634049	0.0711571				3.975e-08	0.0070519	-0.809311
1.9875e-08	0.327904	3.975e-08	0.0650025	0.0653505				3.98e-08	0.175462	-0.328259
1.99e-08	0.30227	3.98e-08	0.0652022	0.0664062				3.985e-08	0.107815	-1.43329
1.9925e-08	0.30494	3.985e-08	0.0648028	0.063239				3.99e-08	-0.63033	-0.475504
1.995e-08	0.305474	3.99e-08	0.0627059	0.0655617				3.995e-08	0.168266	0.32615
1.9975e-08	0.329239	3.995e-08	0.0645032	0.067462				4e-08	-0.968096	-0.983356
2e-08	0.295327	4e-08	0.0614079	0.0637669				4.005e-08	0.664486	0.49924
2.0025e-08	0.311081	4.005e-08	0.065302	0.067462				4.01e-08	-0.991001	0.986392
2.005e-08	0.309746	4.01e-08	0.0609086	0.0685177				4.015e-08	-1.06221	0.713456
2.0075e-08	0.308945	4.015e-08	0.0605092	0.0675676				4.02e-08	-0.65601	0.278633
2.01e-08	0.303071	4.02e-08	0.061308	0.0661951				4.025e-08	0.2696	0.28409
2.0125e-08	0.319626	4.025e-08	0.0634049	0.065984				4.03e-08	-1.00055	-1.56486
2.015e-08	0.308945	4.03e-08	0.06001	0.0609164				4.035e-08	-1.95549	-1.362
2.0175e-08	0.311348	4.035e-08	0.0574139	0.0612331				4.04e-08	0.414786	-0.228749
2.02e-08	0.312951	4.04e-08	0.0631053	0.063978				4.045e-08	-0.42102	-0.509372
2.0225e-08	0.304406	4.045e-08	0.0608088	0.0630279				4.05e-08	1.07456	-1.03446
2.025e-08	0.301736	4.05e-08	0.0643035	0.0614443				4.055e-08	-1.09372	0.104913
2.0275e-08	0.307076	4.055e-08	0.0587119	0.0641892				4.06e-08	-2.13876	-0.868824
2.03e-08	0.304673	4.06e-08	0.0559161	0.0614443				4.065e-08	0.373188	-1.60129
2.0325e-08	0.301202	4.065e-08	0.0619071	0.0593328				4.07e-08	-0.835391	-1.5604
2.035e-08	0.322029	4.07e-08	0.0587119	0.0592272				4.075e-08	-1.43984	-0.046847
2.0375e-08	0.311883	4.075e-08	0.0570145	0.0629223				4.08e-08	-0.501465	-2.38214
2.04e-08	0.293191	4.08e-08	0.0591113	0.0566934				4.085e-08	-2.41287	-0.907131
2.0425e-08	0.299599	4.085e-08	0.0542187	0.0602829				4.09e-08	-1.22892	0.983941
2.045e-08	0.313218	4.09e-08	0.0569146	0.0649282				4.095e-08	-0.654377	-0.373624
2.0475e-08	0.299332	4.095e-08	0.0581128	0.0612331				4.1e-08	-1.7165	-0.00246513
2.05e-08	0.305474	4.1e-08	0.055317	0.0619721				4.105e-08	-1.96168	-0.911709
2.0525e-08	0.283845	4.105e-08	0.0545182	0.0594383				4.11e-08	-0.0700336	-1.20289
2.055e-08	0.302537	4.11e-08	0.0589116	0.0584882				4.115e-08	1.62237	-0.748407
2.0575e-08	0.292924	4.115e-08	0.0628058	0.0594383				4.12e-08	1.58779	0.0398122
2.06e-08	0.311081	4.12e-08	0.0625062	0.0612331				4.125e-08	-0.472749	-0.959975
2.0625e-08	0.29506	4.125e-08	0.057314	0.0584882				4.13e-08	-0.76109	-0.79634
2.065e-08	0.300935	4.13e-08	0.0564154	0.0586993				4.135e-08	-1.13398	2.45836
2.0675e-08	0.318291	4.135e-08	0.055317	0.066723				4.14e-08	1.02587	1.16315
2.07e-08	0.299866	4.14e-08	0.0603095	0.063239				4.145e-08	-0.927285	-1.18442
2.0725e-08	0.287316	4.145e-08	0.0554169	0.0571157				4.15e-08	0.489786	-0.307296
2.075e-08	0.296128	4.15e-08	0.0586121	0.0591216				4.155e-08	-0.468924	-0.142162
2.0775e-08	0.304406	4.155e-08	0.0561158	0.0593328				4.16e-08	-1.51474	-0.776928
2.08e-08	0.285981	4.16e-08	0.0534199	0.057538				4.165e-08	-0.845774	-1.54055
2.0825e-08	0.299065	4.165e-08	0.0548178	0.0554265				4.17e-08	-0.846504	0.778901
2.085e-08	0.292924	4.17e-08	0.0546181	0.061022				4.175e-08	-0.132795	-0.155028
2.0875e-08	0.286782	4.175e-08	0.0561158	0.0584882				4.18e-08	-0.42869	-0.0324271
2.09e-08	0.280374	4.18e-08	0.0552172	0.0585938				4.185e-08	-0.00859641	1.15236
2.0925e-08	0.284379	4.185e-08	0.056016	0.0613387				4.19e-08	-1.74397	-0.170292
2.095e-08	0.285981	4.19e-08	0.0517224	0.0578547				4.195e-08	-1.87591	-1.07123
2.0975e-08	0.297997	4.195e-08	0.0512232	0.0554265				4.2e-08	-1.54161	-0.266994
2.1e-08	0.292924	4.2e-08	0.0518223	0.0572213				4.205e-08	-0.993626	-1.3852
2.1025e-08	0.301202	4.205e-08	0.0529206	0.0542652				4.21e-08	-1.46578	-0.750227
2.105e-08	0.302804	4.21e-08	0.0516226	0.0556377				4.215e-08	-0.446531	-2.4742
2.1075e-08	0.291322	4.215e-08	0.0538193	0.0512035				4.22e-08	-0.577775	-1.62425
2.11e-08	0.290788	4.22e-08	0.05332	0.0531039				4.225e-08	-0.453255	0.907945
2.1125e-08	0.285447	4.225e-08	0.0534199	0.0591216				4.23e-08	-0.500629	-0.00390114
2.115e-08	0.269693	4.23e-08	0.0531203	0.0566934				4.235e-08	-1.32207	0.809577
2.1175e-08	0.293992	4.235e-08	0.0510235	0.0584882				4.24e-08	-1.07076	1.66885
2.12e-08	0.297463	4.24e-08	0.0514229	0.0603885				4.245e-08	-2.02592	-3.23729
2.1225e-08	0.285714	4.245e-08	0.0490265	0.0482475				4.25e-08	-0.868256	-1.60019
2.125e-08	0.276368	4.25e-08	0.0515227	0.0520481				4.255e-08	-1.13431	0.347091
2.1275e-08	0.283311	4.255e-08	0.0507239	0.0565878				4.26e-08	0.765764	-0.750485
2.13e-08	0.28251	4.26e-08	0.0549176	0.0537373				4.265e-08	-1.322	0.33151
2.1325e-08	0.279306	4.265e-08	0.0499251	0.0561655				4.27e-08	-0.416183	-1.82006
2.135e-08	0.29239	4.27e-08	0.0518223	0.0507812				4.275e-08	-0.204954	-0.342741
2.1375e-08	0.285447	4.275e-08	0.0521218	0.0541596				4.28e-08	-0.473897	-0.177869
2.14e-08	0.277437	4.28e-08	0.051323	0.0543708				4.285e-08	-0.831796	1.52595
2.1425e-08	0.259279	4.285e-08	0.0503245	0.058277				4.29e-08	0.429423	1.51766
2.145e-08	0.281709	4.29e-08	0.0530205	0.0580659				4.295e-08	0.861191	-0.784881
2.1475e-08	0.313218	4.295e-08	0.0538193	0.0523649				4.3e-08	-0.50782	-1.19507
2.15e-08	0.293458	4.3e-08	0.0505242	0.0512035				4.305e-08	0.0117626	0.872305
2.1525e-08	0.28972	4.305e-08	0.0515227	0.0559544				4.31e-08	0.841936	-0.556421
2.155e-08	0.273431	4.31e-08	0.0532202	0.0523649				4.315e-08	0.260934	-0.0800517
2.1575e-08	0.281976	4.315e-08	0.0517224	0.053315				4.32e-08	-0.0567454	-0.536746
2.16e-08	0.280107	4.32e-08	0.0508238	0.0520481				4.325e-08	0.954226	-1.26309
2.1625e-08	0.289987	4.325e-08	0.0529206	0.0501478				4.33e-08	-0.119971	1.35605
2.165e-08	0.275834	4.33e-08	0.0503245	0.0561655				4.335e-08	-0.975979	1.52379
2.1675e-08	0.286248	4.335e-08	0.0482277	0.0563767				4.34e-08	-0.899115	-0.861798
2.17e-08	0.278238	4.34e-08	0.0482277	0.0505701				4.345e-08	0.428293	-1.32592
2.1725e-08	0.29506	4.345e-08	0.0510235	0.0493032				4.35e-08	-1.19235	-0.937591
2.175e-08	0.301202	4.35e-08	0.0472292	0.0500422				4.355e-08	1.16985	0.352631
2.1775e-08	0.278772	4.355e-08	0.0523215	0.0528927				4.36e-08	2.01394	-1.1945
2.18e-08	0.284913	4.36e-08	0.054019	0.0490921				4.365e-08	1.10699	0.95814
2.1825e-08	0.281976	4.365e-08	0.0518223	0.0539485				4.37e-08	0.69219	-0.09572
2.185e-08	0.272363	4.37e-08	0.0507239	0.0513091				4.375e-08	-0.311442	-0.473737
2.1875e-08	0.282243	4.375e-08	0.0483275	0.0502534				4.38e-08	0.624811	0.236287
2.19e-08	0.291589	4.38e-08	0.0502247	0.0517314				4.385e-08	-2.96543	0.902771
2.1925e-08	0.268625	4.385e-08	0.0421368	0.0531039				4.39e-08	-1.30545	-0.479448
2.195e-08	0.287049	4.39e-08	0.0456316	0.0497255				4.395e-08	-2.41233	-0.497021
2.1975e-08	0.284913	4.395e-08	0.0430354	0.0495144				4.4e-08	1.43969	-0.194634
2.2e-08	0.282777	4.4e-08	0.051323	0.0500422				4.405e-08	-0.350534	-0.624128
2.2025e-08	0.272897	4.405e-08	0.0472292	0.0488809				4.41e-08	-0.867744	-0.688051
2.205e-08	0.274232	4.41e-08	0.0459311	0.0485642				4.415e-08	0.672939	1.1322
2.2075e-08	0.280908	4.415e-08	0.0491263	0.052576				4.42e-08	-1.44942	-0.356523
2.21e-08	0.259012	4.42e-08	0.0443335	0.0489865				4.425e-08	0.370489	0.36278
2.2125e-08	0.257944	4.425e-08	0.0481278	0.0504645				4.43e-08	1.32179	0.0212964
2.215e-08	0.283044	4.43e-08	0.050025	0.0495144				4.435e-08	0.247657	0.233522
2.2175e-08	0.281175	4.435e-08	0.0475287	0.0498311				4.44e-08	-0.322599	-1.17621
2.22e-08	0.266489	4.44e-08	0.0461308	0.0464527				4.445e-08	-1.91267	-0.965666
2.2225e-08	0.267824	4.445e-08	0.0425362	0.0467694				4.45e-08	0.337691	-0.149798
2.225e-08	0.277437	4.45e-08	0.0472292	0.0484586				4.455e-08	0.55345	-2.54607
2.2275e-08	0.279039	4.455e-08	0.0475287	0.0428632				4.46e-08	0.583939	0.416754
2.23e-08	0.263017	4.46e-08	0.0474289	0.0494088				4.465e-08	-1.20229	1.47284
2.2325e-08	0.261415	4.465e-08	0.0434348	0.0516258				4.47e-08	-0.33505	0.237483
2.235e-08	0.247263	4.47e-08	0.0451323	0.0486698				4.475e-08	-0.493813	0.498482
2.2375e-08	0.273965	4.475e-08	0.0446331	0.0490921				4.48e-08	0.282776	-0.744064
2.24e-08	0.27984	4.48e-08	0.0461308	0.046136				4.485e-08	-0.0643534	-0.108373
2.2425e-08	0.278238	4.485e-08	0.0452322	0.0474029				4.49e-08	-0.882951	-1.82838
2.245e-08	0.266222	4.49e-08	0.043335	0.043391				4.495e-08	-1.56333	-1.80674
2.2475e-08	0.278238	4.495e-08	0.0417374	0.0432855				4.5e-08	-2.01038	2.18916
2.25e-08	0.272897	4.5e-08	0.040639	0.0520481				4.505e-08	-1.089	-0.578594
2.2525e-08	0.264619	4.505e-08	0.0424363	0.0457137				4.51e-08	0.356184	0.869396
2.255e-08	0.261682	4.51e-08	0.045332	0.0487753				4.515e-08	0.28933	-0.626177
2.2575e-08	0.26008	4.515e-08	0.0450325	0.0452914				4.52e-08	1.02943	-1.50785
2.26e-08	0.277437	4.52e-08	0.0464304	0.0431799				4.525e-08	-0.417024	-1.10472
2.2625e-08	0.26008	4.525e-08	0.0432351	0.0439189				4.53e-08	0.561451	0.255153
2.265e-08	0.25474	4.53e-08	0.0451323	0.0467694				4.535e-08	-0.0327341	-0.0566356
2.2675e-08	0.281709	4.535e-08	0.0437344	0.0459248				4.54e-08	-0.581466	0.925267
2.27e-08	0.261148	4.54e-08	0.0424363	0.0479307				4.545e-08	0.448812	-0.732023
2.2725e-08	0.262483	4.545e-08	0.0444333	0.0441301				4.55e-08	-0.485189	-1.38438
2.275e-08	0.25741	4.55e-08	0.0423365	0.0425465				4.555e-08	-1.66291	-0.496347
2.2775e-08	0.265421	4.555e-08	0.0397404	0.0443412				4.56e-08	0.815703	-1.53691
2.28e-08	0.27984	4.56e-08	0.0447329	0.041913				4.565e-08	-0.894696	-0.452684
2.2825e-08	0.271829	4.565e-08	0.0410384	0.0441301				4.57e-08	-0.0495821	0.295825
2.285e-08	0.275834	4.57e-08	0.042636	0.0456081				4.575e-08	0.313744	0.318217
2.2875e-08	0.261415	4.575e-08	0.0432351	0.0455025				4.58e-08	-2.76624	0.437286
2.29e-08	0.268358	4.58e-08	0.0367449	0.0456081				4.585e-08	0.702186	-0.75867
2.2925e-08	0.282243	4.585e-08	0.0437344	0.0428632				4.59e-08	-0.246984	0.187678
2.295e-08	0.265688	4.59e-08	0.0416375	0.0447635				4.595e-08	-0.614502	1.57694
2.2975e-08	0.258745	4.595e-08	0.0407389	0.047614				4.6e-08	0.530829	-0.455766
2.3e-08	0.256075	4.6e-08	0.0429356	0.0430743				4.605e-08	-1.06001	-1.07341
2.3025e-08	0.26008	4.605e-08	0.0395407	0.0415963				4.61e-08	-0.989878	0.271584
2.305e-08	0.262483	4.61e-08	0.0395407	0.0443412				4.615e-08	0.848215	1.27671
2.3075e-08	0.259546	4.615e-08	0.0431353	0.0463471				4.62e-08	0.282249	-0.770816
2.31e-08	0.256876	4.62e-08	0.0418372	0.0418074				4.625e-08	0.502163	-0.307952
2.3125e-08	0.259546	4.625e-08	0.0421368	0.042652				4.63e-08	0.0804271	1.14498
2.315e-08	0.261949	4.63e-08	0.0411383	0.0456081				4.635e-08	-0.293831	0.521754
2.3175e-08	0.271829	4.635e-08	0.0402396	0.0441301				4.64e-08	-0.669681	-0.947418
2.32e-08	0.259813	4.64e-08	0.039341	0.0408573				4.645e-08	0.0943415	0.0139934
2.3225e-08	0.256609	4.645e-08	0.0407389	0.0427576				4.65e-08	-1.17714	-0.913491
2.325e-08	0.258745	4.65e-08	0.0380429	0.0406461				4.655e-08	-0.361644	0.0511571
2.3275e-08	0.25741	4.655e-08	0.0395407	0.0425465				4.66e-08	0.356932	-0.379864
2.33e-08	0.260881	4.66e-08	0.0408387	0.0414907				4.665e-08	-0.271265	-2.01357
2.3325e-08	0.251001	4.665e-08	0.0394408	0.0379012				4.67e-08	-0.501388	0.608261
2.335e-08	0.266756	4.67e-08	0.0388417	0.0432855				4.675e-08	-0.532271	0.727516
2.3375e-08	0.260347	4.675e-08	0.038642	0.043391				4.68e-08	0.340352	-0.914107
2.34e-08	0.257677	4.68e-08	0.0402396	0.0398015				4.685e-08	-0.0929182	-0.798065
2.3425e-08	0.26008	4.685e-08	0.0392411	0.0399071				4.69e-08	-0.275917	-0.580903
2.345e-08	0.2502	4.69e-08	0.0387419	0.0402238				4.695e-08	-0.813205	-1.42488
2.3475e-08	0.252069	4.695e-08	0.0375437	0.0383235				4.7e-08	1.32879	0.311172
2.35e-08	0.251535	4.7e-08	0.0416375	0.0418074				4.705e-08	-0.0185225	-0.990849
2.3525e-08	0.256342	4.705e-08	0.0388417	0.0389569				4.71e-08	-1.01523	-0.92522
2.355e-08	0.251802	4.71e-08	0.0367449	0.0389569				4.715e-08	1.08679	-0.553978
2.3575e-08	0.246195	4.715e-08	0.0407389	0.0395904				4.72e-08	-0.319296	-1.8135
2.36e-08	0.255274	4.72e-08	0.0378432	0.0368454				4.725e-08	0.00436589	0.753176
2.3625e-08	0.260614	4.725e-08	0.0383425	0.0420186				4.73e-08	-0.591762	-1.32825
2.365e-08	0.245127	4.73e-08	0.0370444	0.0375845				4.735e-08	-1.49774	-0.854431
2.3675e-08	0.249399	4.735e-08	0.0351473	0.0384291				4.74e-08	-1.74019	-1.04666
2.37e-08	0.243525	4.74e-08	0.0345482	0.0379012				4.745e-08	0.123531	-1.29107
2.3725e-08	0.241121	4.745e-08	0.0380429	0.0372677				4.75e-08	-0.426045	0.112101
2.375e-08	0.255274	4.75e-08	0.0368447	0.0400127				4.755e-08	0.157048	-1.26651
2.3775e-08	0.259813	4.755e-08	0.0378432	0.0370566				4.76e-08	-1.73775	-0.995764
2.38e-08	0.240854	4.76e-08	0.0340489	0.0374789				4.765e-08	-0.585655	-0.361683
2.3825e-08	0.246195	4.765e-08	0.0361458	0.0386402				4.77e-08	-1.29619	0.170603
2.385e-08	0.240053	4.77e-08	0.034648	0.0395904				4.775e-08	-1.07485	0.184592
2.3875e-08	0.248064	4.775e-08	0.0349476	0.0394848				4.78e-08	1.9042	0.770517
2.39e-08	0.240587	4.78e-08	0.0405392	0.0405405				4.785e-08	-0.63157	-0.987922
2.3925e-08	0.251802	4.785e-08	0.0355467	0.0368454				4.79e-08	-0.774745	-0.820376
2.395e-08	0.228304	4.79e-08	0.0351473	0.0370566				4.795e-08	-1.80769	-0.18159
2.3975e-08	0.237383	4.795e-08	0.0330504	0.0382179				4.8e-08	-0.748581	0.878484
2.4e-08	0.239519	4.8e-08	0.0349476	0.0402238				4.805e-08	-1.05041	-0.472246
2.4025e-08	0.243525	4.805e-08	0.0342486	0.0373733				4.81e-08	0.90751	-0.355474
2.405e-08	0.263818	4.81e-08	0.0378432	0.0374789				4.815e-08	-0.551276	-1.23901
2.4075e-08	0.24753	4.815e-08	0.0349476	0.0355785				4.82e-08	0.411721	0.0899696
2.41e-08	0.26008	4.82e-08	0.036645	0.0381123				4.825e-08	-0.2081	0.154635
2.4125e-08	0.24753	4.825e-08	0.035347	0.0381123				4.83e-08	-1.51906	-0.892714
2.415e-08	0.237116	4.83e-08	0.0327509	0.0358953				4.835e-08	1.46127	-0.353241
2.4175e-08	0.255007	4.835e-08	0.0382426	0.0368454				4.84e-08	-1.76488	-0.661991
2.42e-08	0.241121	4.84e-08	0.0320519	0.0361064				4.845e-08	-2.55401	0.411428
2.4225e-08	0.242724	4.845e-08	0.0304543	0.0381123				4.85e-08	-1.95969	-0.217
2.425e-08	0.23765	4.85e-08	0.0314528	0.0367399				4.855e-08	-0.722377	-0.794211
2.4275e-08	0.238718	4.855e-08	0.0336495	0.035473				4.86e-08	-0.176319	0.12393
2.43e-08	0.251268	4.86e-08	0.0345482	0.0371622				4.865e-08	-1.87959	-0.347604
2.4325e-08	0.252069	4.865e-08	0.0312531	0.0361064				4.87e-08	-1.17278	-0.767318
2.435e-08	0.243258	4.87e-08	0.0324513	0.0351562				4.875e-08	0.020133	-1.619
2.4375e-08	0.229372	4.875e-08	0.0345482	0.0333615				4.88e-08	-0.346014	-0.805028
2.44e-08	0.241121	4.88e-08	0.0337494	0.0348395				4.885e-08	-0.49798	0.0113195
2.4425e-08	0.224566	4.885e-08	0.03335	0.0363176				4.89e-08	-2.00251	0.127905
2.445e-08	0.22964	4.89e-08	0.0304543	0.0364231				4.895e-08	-0.749988	1.11063
2.4475e-08	0.239786	4.895e-08	0.032651	0.0382179				4.9e-08	1.1037	-0.505308
2.45e-08	0.234179	4.9e-08	0.0359461	0.0349451				4.905e-08	0.354811	1.29408
2.4525e-08	0.239519	4.905e-08	0.0344483	0.0383235				4.91e-08	2.16244	-0.490271
2.455e-08	0.220828	4.91e-08	0.0376435	0.034734				4.915e-08	-0.714577	-1.30004
2.4575e-08	0.23498	4.915e-08	0.0322516	0.0330448				4.92e-08	-0.4873	0.943558
2.46e-08	0.226168	4.92e-08	0.0325512	0.0372677				4.925e-08	-0.588151	-0.0859623
2.4625e-08	0.250734	4.925e-08	0.0322516	0.0351562				4.93e-08	-0.0867836	-1.72194
2.465e-08	0.238184	4.93e-08	0.0330504	0.0318834				4.935e-08	-0.0784759	-2.10213
2.4675e-08	0.230708	4.935e-08	0.0329506	0.0310389				4.94e-08	-0.950794	0.758136
2.47e-08	0.223231	4.94e-08	0.0312531	0.0364231				4.945e-08	0.709272	-2.70175
2.4725e-08	0.242724	4.945e-08	0.0341488	0.0296664				4.95e-08	-0.16491	-0.604848
2.475e-08	0.234179	4.95e-08	0.0324513	0.0335726				4.955e-08	1.3363	0.0079884
2.4775e-08	0.24032	4.955e-08	0.0350474	0.0346284				4.96e-08	-1.31304	1.01015
2.48e-08	0.251802	4.96e-08	0.0301548	0.0364231				4.965e-08	0.0248489	0.186939
2.4825e-08	0.228838	4.965e-08	0.0324513	0.034734				4.97e-08	-0.13408	2.8024
2.485e-08	0.238451	4.97e-08	0.0320519	0.0395904				4.975e-08	-0.906802	-0.634792
2.4875e-08	0.229372	4.975e-08	0.0305542	0.0329392				4.98e-08	-0.343597	0.037587
2.49e-08	0.223765	4.98e-08	0.0314528	0.0341005				4.985e-08	-1.4558	-0.906147
2.4925e-08	0.231509	4.985e-08	0.029356	0.0322002				4.99e-08	1.51552	-0.400186
2.495e-08	0.24032	4.99e-08	0.0345482	0.0330448				4.995e-08	-0.775637	0.555242
2.4975e-08	0.232043	4.995e-08	0.0303545	0.034734				5e-08	-0.152955	-0.897453
2.5e-08	0.240053	5e-08	0.031353	0.0318834				5.005e-08	-0.766476	1.07139
2.5025e-08	0.22243	5.005e-08	0.0301548	0.035473				5.01e-08	-0.423588	-2.07345
2.505e-08	0.235781	5.01e-08	0.030654	0.0294552				5.015e-08	0.146422	-1.00179
2.5075e-08	0.22777	5.015e-08	0.0315527	0.0313556				5.02e-08	-1.14907	1.03315
2.51e-08	0.231509	5.02e-08	0.0291563	0.0350507				5.025e-08	-0.465612	0.586046
2.5125e-08	0.208011	5.025e-08	0.0302546	0.0341005				5.03e-08	-0.802456	-0.826207
2.515e-08	0.221362	5.03e-08	0.0295557	0.0313556				5.035e-08	0.281175	-0.0304507
2.5175e-08	0.239786	5.035e-08	0.031353	0.032728				5.04e-08	0.000768482	-0.71012
2.52e-08	0.223498	5.04e-08	0.0307539	0.0313556				5.045e-08	-1.47943	-0.822793
2.5225e-08	0.227503	5.045e-08	0.0280579	0.0310389				5.05e-08	0.18005	0.832184
2.525e-08	0.23231	5.05e-08	0.0308537	0.0339949				5.055e-08	0.298738	0.036081
2.5275e-08	0.229907	5.055e-08	0.0309536	0.0324113				5.06e-08	0.934247	-0.476604
2.53e-08	0.229105	5.06e-08	0.0319521	0.0313556				5.065e-08	-0.899741	-0.475142
2.5325e-08	0.236048	5.065e-08	0.028657	0.03125				5.07e-08	1.11768	1.01916
2.535e-08	0.223498	5.07e-08	0.0320519	0.0338894				5.075e-08	-1.7614	-1.2209
2.5375e-08	0.238985	5.075e-08	0.0269596	0.0296664				5.08e-08	-0.375076	0.449036
2.54e-08	0.215487	5.08e-08	0.0292561	0.0326225				5.085e-08	-0.72088	-1.28101
2.5425e-08	0.236849	5.085e-08	0.0285572	0.0293497				5.09e-08	-0.0243971	-0.473286
2.545e-08	0.220561	5.09e-08	0.0296555	0.0307221				5.095e-08	-1.70713	0.568712
2.5475e-08	0.218425	5.095e-08	0.02666	0.0325169				5.1e-08	-1.24287	1.0921
2.55e-08	0.227503	5.1e-08	0.027359	0.0333615				5.105e-08	1.43794	-0.881375
2.5525e-08	0.221095	5.105e-08	0.0318522	0.0296664				5.11e-08	-1.3606	-0.00947814
2.555e-08	0.224299	5.11e-08	0.0269596	0.0311444				5.115e-08	0.21799	0.515515
2.5575e-08	0.220294	5.115e-08	0.0295557	0.031989				5.12e-08	0.337067	0.458043
2.56e-08	0.238985	5.12e-08	0.0296555	0.0317779				5.125e-08	-0.365691	-1.23823
2.5625e-08	0.230441	5.125e-08	0.0283575	0.0286106				5.13e-08	-0.953866	1.16143
2.565e-08	0.225634	5.13e-08	0.0272591	0.0328336				5.135e-08	0.0458882	1.39688
2.5675e-08	0.237383	5.135e-08	0.0288567	0.0331503				5.14e-08	1.04888	-1.01309
2.57e-08	0.217623	5.14e-08	0.0304543	0.0287162				5.145e-08	1.8779	-1.3109
2.5725e-08	0.218692	5.145e-08	0.0317524	0.0280828				5.15e-08	-0.0139263	0.986186
2.575e-08	0.223765	5.15e-08	0.0284573	0.0320946				5.155e-08	-1.43788	1.28166
2.5775e-08	0.209346	5.155e-08	0.0259611	0.0325169				5.16e-08	0.0446355	-1.32264
2.58e-08	0.226702	5.16e-08	0.0283575	0.027766				5.165e-08	-1.38426	0.155863
2.5825e-08	0.214686	5.165e-08	0.0258612	0.0302998				5.17e-08	-0.4929	0.451176
2.585e-08	0.215487	5.17e-08	0.0272591	0.0307221				5.175e-08	-0.674023	0.80651
2.5875e-08	0.223231	5.175e-08	0.0268597	0.03125				5.18e-08	0.400208	1.93735
2.59e-08	0.216288	5.18e-08	0.0285572	0.0331503				5.185e-08	-0.919786	-0.391108
2.5925e-08	0.223765	5.185e-08	0.0262606	0.0289274				5.19e-08	-0.623439	-0.455076
2.595e-08	0.222163	5.19e-08	0.02666	0.0287162				5.195e-08	-0.386329	-0.998583
2.5975e-08	0.216021	5.195e-08	0.0269596	0.0276605				5.2e-08	-1.17273	2.23634
2.6e-08	0.241389	5.2e-08	0.0255617	0.0332559				5.205e-08	-0.271919	0.0124902
2.6025e-08	0.218158	5.205e-08	0.0269596	0.0292441				5.21e-08	-0.75861	0.610883
2.605e-08	0.214686	5.21e-08	0.0260609	0.0301943				5.215e-08	2.08422	-1.68368
2.6075e-08	0.208278	5.215e-08	0.030654	0.0260769				5.22e-08	0.507624	0.182324
2.61e-08	0.213885	5.22e-08	0.0279581	0.0292441				5.225e-08	0.262219	-1.15318
2.6125e-08	0.227503	5.225e-08	0.0274588	0.0268159				5.23e-08	-1.14144	0.355373
2.615e-08	0.202403	5.23e-08	0.0250624	0.0293497				5.235e-08	-1.45251	-0.0743849
2.6175e-08	0.213351	5.235e-08	0.0244633	0.0285051				5.24e-08	-0.115235	-1.84387
2.62e-08	0.226969	5.24e-08	0.0265602	0.0253378				5.245e-08	0.430909	0.828118
2.6225e-08	0.219493	5.245e-08	0.027359	0.0298775				5.25e-08	-1.47351	0.213575
2.625e-08	0.226435	5.25e-08	0.0241638	0.0287162				5.255e-08	-0.190913	0.880679
2.6275e-08	0.227236	5.255e-08	0.0261608	0.029772				5.26e-08	2.01901	0.876449
2.63e-08	0.218959	5.26e-08	0.0296555	0.0296664				5.265e-08	0.600355	0.258773
2.6325e-08	0.223765	5.265e-08	0.0272591	0.0285051				5.27e-08	-0.267779	-0.422649
2.635e-08	0.213351	5.27e-08	0.0257614	0.0272382				5.275e-08	-0.397215	0.247202
2.6375e-08	0.214686	5.275e-08	0.0254618	0.0282939				5.28e-08	0.339747	1.84359
2.64e-08	0.221362	5.28e-08	0.0265602	0.0309333				5.285e-08	1.45125	0.666031
2.6425e-08	0.199199	5.285e-08	0.0282576	0.0288218				5.29e-08	0.51475	0.90708
2.645e-08	0.222964	5.29e-08	0.02666	0.0291385				5.295e-08	0.135391	-1.57751
2.6475e-08	0.21522	5.295e-08	0.0259611	0.02481				5.3e-08	-0.370115	0.646586
2.65e-08	0.217089	5.3e-08	0.0250624	0.0285051				5.305e-08	-0.627431	0.888664
2.6525e-08	0.211482	5.305e-08	0.0245632	0.0288218				5.31e-08	0.178609	-0.176284
2.655e-08	0.203204	5.31e-08	0.0257614	0.0269215				5.315e-08	-0.392265	1.4376
2.6575e-08	0.210681	5.315e-08	0.0247629	0.0295608				5.32e-08	-0.776825	-2.06737
2.66e-08	0.218959	5.32e-08	0.0240639	0.0235431				5.325e-08	-0.533819	-2.5801
2.6625e-08	0.201602	5.325e-08	0.0243635	0.0225929				5.33e-08	-0.35353	2.67347
2.665e-08	0.209613	5.33e-08	0.0245632	0.0313556				5.335e-08	-0.551909	-0.220438
2.6675e-08	0.214419	5.335e-08	0.0241638	0.0263936				5.34e-08	-0.624671	-0.167399
2.67e-08	0.2251	5.34e-08	0.0239641	0.0263936				5.345e-08	-0.571056	1.2091
2.6725e-08	0.213084	5.345e-08	0.0239641	0.0286106				5.35e-08	1.38712	-0.250378
2.675e-08	0.20267	5.35e-08	0.0269596	0.0260769				5.355e-08	0.108914	0.561483
2.6775e-08	0.197597	5.355e-08	0.0248627	0.0273438				5.36e-08	0.418795	1.31274
2.68e-08	0.208278	5.36e-08	0.0252621	0.0285051				5.365e-08	-0.291292	1.17829
2.6825e-08	0.2	5.365e-08	0.0240639	0.0281883				5.37e-08	0.338425	0.788964
2.685e-08	0.207477	5.37e-08	0.0249626	0.0274493				5.375e-08	-0.759098	-0.302404
2.6875e-08	0.216021	5.375e-08	0.0231653	0.025549				5.38e-08	-0.834572	0.833939
2.69e-08	0.215754	5.38e-08	0.0229656	0.0273438				5.385e-08	0.824332	-1.34771
2.6925e-08	0.210147	5.385e-08	0.0254618	0.0236486				5.39e-08	-0.92289	0.493999
2.695e-08	0.204806	5.39e-08	0.022666	0.0266047				5.395e-08	-0.612844	0.226865
2.6975e-08	0.209079	5.395e-08	0.0230654	0.0260769				5.4e-08	0.150378	-0.811583
2.7e-08	0.212016	5.4e-08	0.0241638	0.0242821				5.405e-08	-0.0543664	1.36173
2.7025e-08	0.213084	5.405e-08	0.0237644	0.027766				5.41e-08	-0.0653861	1.54552
2.705e-08	0.19466	5.41e-08	0.0236645	0.0279772				5.415e-08	0.44299	1.02014
2.7075e-08	0.213084	5.415e-08	0.0243635	0.027027				5.42e-08	-1.25858	0.104984
2.71e-08	0.2	5.42e-08	0.0216675	0.0254434				5.425e-08	-0.620752	-0.878463
2.7125e-08	0.208545	5.425e-08	0.0225662	0.0237542				5.43e-08	0.736795	-2.44936
2.715e-08	0.198398	5.43e-08	0.0245632	0.0211149				5.435e-08	-0.909068	-0.712836
2.7175e-08	0.217089	5.435e-08	0.021967	0.0238598				5.44e-08	-0.661375	0.313578
2.72e-08	0.208011	5.44e-08	0.0222666	0.0254434				5.445e-08	0.8993	-0.286114
2.7225e-08	0.204539	5.445e-08	0.0245632	0.0243877				5.45e-08	-0.952391	0.417899
2.725e-08	0.201602	5.45e-08	0.0216675	0.0254434				5.455e-08	-1.36207	-0.772298
2.7275e-08	0.205874	5.455e-08	0.0209685	0.0234375				5.46e-08	0.33734	-0.787371
2.73e-08	0.192523	5.46e-08	0.0234648	0.0233319				5.465e-08	-0.0715661	-1.3275
2.7325e-08	0.204272	5.465e-08	0.0227659	0.0223818				5.47e-08	-0.217309	-0.752197
2.735e-08	0.202937	5.47e-08	0.0224663	0.0232264				5.475e-08	-0.496571	-0.63627
2.7375e-08	0.196529	5.475e-08	0.021967	0.0233319				5.48e-08	0.883095	0.666759
2.74e-08	0.200801	5.48e-08	0.0239641	0.0253378				5.485e-08	0.670436	-1.65968
2.7425e-08	0.207477	5.485e-08	0.0235647	0.0215372				5.49e-08	1.25657	0.7705
2.745e-08	0.199199	5.49e-08	0.0243635	0.0253378				5.495e-08	1.11026	-0.702112
2.7475e-08	0.203738	5.495e-08	0.0240639	0.0229096				5.5e-08	1.49841	-0.453389
2.75e-08	0.206409	5.5e-08	0.0245632	0.0232264				5.505e-08	-1.05978	-0.735928
2.7525e-08	0.199466	5.505e-08	0.020669	0.0226985				5.51e-08	-1.14387	0.113134
2.755e-08	0.210681	5.51e-08	0.0204693	0.0239654				5.515e-08	0.0490144	-1.10375
2.7575e-08	0.2	5.515e-08	0.0221667	0.0219595				5.52e-08	0.976555	-1.857
2.76e-08	0.201869	5.52e-08	0.0234648	0.0206926				5.525e-08	0.422782	-0.33653
2.7625e-08	0.195194	5.525e-08	0.0225662	0.0230152				5.53e-08	-1.41739	0.316656
2.765e-08	0.190921	5.53e-08	0.0197703	0.0239654				5.535e-08	0.120446	-1.31259
2.7675e-08	0.195728	5.535e-08	0.021967	0.021326				5.54e-08	0.171541	0.821244
2.77e-08	0.20267	5.54e-08	0.021967	0.0245988				5.545e-08	0.49442	-2.70038
2.7725e-08	0.195995	5.545e-08	0.0223665	0.0190034				5.55e-08	0.546182	-2.04737
2.775e-08	0.202403	5.55e-08	0.0223665	0.0199535				5.555e-08	-1.03783	-2.00093
2.7775e-08	0.196529	5.555e-08	0.01997	0.0199535				5.56e-08	-0.51062	-0.802562
2.78e-08	0.209613	5.56e-08	0.020669	0.0217483				5.565e-08	0.770822	-1.63619
2.7825e-08	0.189853	5.565e-08	0.0224663	0.0203758				5.57e-08	-0.752765	-0.229403
2.785e-08	0.189853	5.57e-08	0.0201697	0.0224873				5.575e-08	0.532198	0.909346
2.7875e-08	0.198932	5.575e-08	0.021967	0.0241765				5.58e-08	-1.13551	-0.335928
2.79e-08	0.211215	5.58e-08	0.0194708	0.0221706				5.585e-08	-1.0185	-1.03907
2.7925e-08	0.193324	5.585e-08	0.0195706	0.0210093				5.59e-08	-0.556303	-1.67629
2.795e-08	0.20534	5.59e-08	0.0201697	0.0199535				5.595e-08	-0.507307	0.220795
2.7975e-08	0.198665	5.595e-08	0.0201697	0.0228041				5.6e-08	1.20344	0.682144
2.8e-08	0.191722	5.6e-08	0.0225662	0.0234375				5.605e-08	-1.24119	1.28259
2.8025e-08	0.193858	5.605e-08	0.0189715	0.0242821				5.61e-08	-0.0816225	-0.250884
2.805e-08	0.202937	5.61e-08	0.0205691	0.0218539				5.615e-08	-0.379563	-2.13468
2.8075e-08	0.205607	5.615e-08	0.0200699	0.0188978				5.62e-08	-0.748401	-0.637417
2.81e-08	0.196262	5.62e-08	0.0194708	0.0211149				5.625e-08	-0.769709	-1.5593
2.8125e-08	0.18478	5.625e-08	0.0193709	0.0196368				5.63e-08	0.95745	0.428744
2.815e-08	0.189853	5.63e-08	0.0217673	0.0225929				5.635e-08	-0.042923	0.547091
2.8175e-08	0.195728	5.635e-08	0.0202696	0.0226985				5.64e-08	1.1293	-1.28312
2.82e-08	0.180774	5.64e-08	0.0218672	0.019848				5.645e-08	-1.07001	-1.58578
2.8225e-08	0.199466	5.645e-08	0.018672	0.0193201				5.65e-08	-0.0365557	0.764162
2.825e-08	0.195995	5.65e-08	0.0200699	0.0228041				5.655e-08	1.35328	0.254008
2.8275e-08	0.183445	5.655e-08	0.021967	0.0219595				5.66e-08	-0.362355	-0.608227
2.83e-08	0.195995	5.66e-08	0.0194708	0.020587				5.665e-08	0.111165	0.772585
2.8325e-08	0.203204	5.665e-08	0.0200699	0.0225929				5.67e-08	0.657138	-0.443432
2.835e-08	0.200534	5.67e-08	0.0207688	0.0206926				5.675e-08	-0.145486	-0.748434
2.8375e-08	0.19733	5.675e-08	0.0195706	0.0201647				5.68e-08	0.329906	0.0737991
2.84e-08	0.187183	5.68e-08	0.0201697	0.021326				5.685e-08	1.09181	-0.726696
2.8425e-08	0.189319	5.685e-08	0.0211682	0.0200591				5.69e-08	1.21331	0.734889
2.845e-08	0.195728	5.69e-08	0.0212681	0.0221706				5.695e-08	-0.453611	-1.69804
2.8475e-08	0.188518	5.695e-08	0.0188717	0.0184755				5.7e-08	-0.764548	-3.14495
2.85e-08	0.202136	5.7e-08	0.0183724	0.0162584				5.705e-08	0.143956	0.453846
2.8525e-08	0.194126	5.705e-08	0.0195706	0.0215372				5.71e-08	0.192541	-0.281804
2.855e-08	0.174633	5.71e-08	0.0195706	0.0203758				5.715e-08	-0.623289	0.19341
2.8575e-08	0.189052	5.715e-08	0.0183724	0.0210093				5.72e-08	0.506555	-1.54632
2.86e-08	0.188518	5.72e-08	0.0198702	0.0183699				5.725e-08	1.13387	0.145293
2.8625e-08	0.195461	5.725e-08	0.020669	0.0207981				5.73e-08	0.459285	-2.82071
2.865e-08	0.181308	5.73e-08	0.0196705	0.016364				5.735e-08	1.45062	-1.98852
2.8675e-08	0.189586	5.735e-08	0.0209685	0.0175253				5.74e-08	1.64577	0.573737
2.87e-08	0.189586	5.74e-08	0.0211682	0.0212204				5.745e-08	0.239983	-0.171958
2.8725e-08	0.182377	5.745e-08	0.0191712	0.0200591				5.75e-08	0.433582	0.885242
2.875e-08	0.197864	5.75e-08	0.0193709	0.0215372				5.755e-08	-1.12533	2.45234
2.8775e-08	0.183712	5.755e-08	0.0171742	0.0237542				5.76e-08	-0.860292	-0.467844
2.88e-08	0.190387	5.76e-08	0.0174738	0.0194257				5.765e-08	-0.740963	0.303806
2.8825e-08	0.189586	5.765e-08	0.0175736	0.0204814				5.77e-08	2.02213	-0.230803
2.885e-08	0.186115	5.77e-08	0.0212681	0.0196368				5.775e-08	-0.795908	-0.621945
2.8875e-08	0.176502	5.775e-08	0.0173739	0.0190034				5.78e-08	-2.15045	-1.89021
2.89e-08	0.192256	5.78e-08	0.0154768	0.017103				5.785e-08	-0.705166	-0.45933
2.8925e-08	0.195728	5.785e-08	0.0173739	0.019109				5.79e-08	-0.512031	0.390626
2.895e-08	0.179973	5.79e-08	0.0175736	0.0202703				5.795e-08	0.348251	-0.0763314
2.8975e-08	0.183712	5.795e-08	0.018672	0.0195312				5.8e-08	-1.45946	-0.177701
2.9e-08	0.175434	5.8e-08	0.0161757	0.0193201				5.805e-08	1.11145	0.456183
2.9025e-08	0.177036	5.805e-08	0.0195706	0.0201647				5.81e-08	0.787739	-0.602577
2.905e-08	0.179439	5.81e-08	0.0190714	0.0185811				5.815e-08	-0.954106	0.32792
2.9075e-08	0.18478	5.815e-08	0.016675	0.019848				5.82e-08	0.585018	-1.84385
2.91e-08	0.19279	5.82e-08	0.018672	0.0166807				5.825e-08	1.60526	-1.43124
2.9125e-08	0.173832	5.825e-08	0.01997	0.0172086				5.83e-08	0.0797082	0.0209038
2.915e-08	0.182644	5.83e-08	0.0178732	0.0192145				5.835e-08	-0.850652	-0.0827981
2.9175e-08	0.181842	5.835e-08	0.0165751	0.0190034				5.84e-08	-0.580806	-0.856863
2.92e-08	0.183979	5.84e-08	0.0168747	0.0178421				5.845e-08	0.292699	-0.366166
2.9225e-08	0.181575	5.845e-08	0.017973	0.0184755				5.85e-08	-0.793389	0.275489
2.925e-08	0.168491	5.85e-08	0.0164753	0.0193201				5.855e-08	-1.73202	0.171236
2.9275e-08	0.175434	5.855e-08	0.0151772	0.019109				5.86e-08	-0.553093	0.591128
2.93e-08	0.17757	5.86e-08	0.016675	0.0196368				5.865e-08	-0.735854	-1.53951
2.9325e-08	0.182644	5.865e-08	0.0163754	0.0165752				5.87e-08	-0.463331	0.607929
2.935e-08	0.179973	5.87e-08	0.016675	0.0195312				5.875e-08	0.418902	-0.250144
2.9375e-08	0.173298	5.875e-08	0.0177733	0.0182644				5.88e-08	2.29526	-0.0554046
2.94e-08	0.177837	5.88e-08	0.0201697	0.0184755				5.885e-08	-0.100721	0.441957
2.9425e-08	0.183712	5.885e-08	0.0169745	0.019109				5.89e-08	1.78068	-2.38936
2.945e-08	0.178104	5.89e-08	0.0193709	0.0150971				5.895e-08	-1.08467	-1.06051
2.9475e-08	0.193591	5.895e-08	0.0155766	0.0168919				5.9e-08	-0.0433703	-0.410719
2.95e-08	0.173031	5.9e-08	0.0168747	0.0177365				5.905e-08	0.616855	0.317298
2.9525e-08	0.186649	5.905e-08	0.0176735	0.0186867				5.91e-08	-1.57189	0.666778
2.955e-08	0.183979	5.91e-08	0.0147778	0.019109				5.915e-08	1.63535	0.330501
2.9575e-08	0.180507	5.915e-08	0.0188717	0.0185811				5.92e-08	-0.0180795	-0.00706803
2.96e-08	0.172497	5.92e-08	0.016675	0.0180532				5.925e-08	-0.205813	0.189915
2.9625e-08	0.169292	5.925e-08	0.0163754	0.0182644				5.93e-08	-0.47221	-0.763447
2.965e-08	0.179706	5.93e-08	0.015976	0.0168919				5.935e-08	0.503822	0.046953
2.9675e-08	0.174099	5.935e-08	0.0171742	0.0179476				5.94e-08	0.626548	-0.0636438
2.97e-08	0.179973	5.94e-08	0.0172741	0.0177365				5.945e-08	-0.108335	0.519137
2.9725e-08	0.175968	5.945e-08	0.0162756	0.0184755				5.95e-08	0.091755	0.177194
2.975e-08	0.189052	5.95e-08	0.0164753	0.0179476				5.955e-08	-0.881435	0.0661317
2.9775e-08	0.164486	5.955e-08	0.0151772	0.0177365				5.96e-08	0.650743	-1.98228
2.98e-08	0.175701	5.96e-08	0.0170744	0.014886				5.965e-08	0.853128	0.696529
2.9825e-08	0.174099	5.965e-08	0.0172741	0.0184755				5.97e-08	0.426729	0.352363
2.985e-08	0.174099	5.97e-08	0.016675	0.0179476				5.975e-08	-0.316721	-0.304808
2.9875e-08	0.170628	5.975e-08	0.0156765	0.0169975				5.98e-08	0.357806	0.829437
2.99e-08	0.165821	5.98e-08	0.0164753	0.0184755				5.985e-08	1.98326	-1.00173
2.9925e-08	0.164753	5.985e-08	0.0184723	0.0159417				5.99e-08	0.524835	-0.647859
2.995e-08	0.166088	5.99e-08	0.0165751	0.016364				5.995e-08	0.330885	0.099065
2.9975e-08	0.175167	5.995e-08	0.0162756	0.0173142				6e-08	-1.215	-0.879003
3e-08	0.175167	6e-08	0.0142786	0.0159417				6.005e-08	0.975944	-0.523285
3.0025e-08	0.191722	6.005e-08	0.0169745	0.016364				6.01e-08	-1.37178	0.148746
3.005e-08	0.177036	6.01e-08	0.013979	0.0172086				6.015e-08	0.906332	-0.360737
3.0075e-08	0.171696	6.015e-08	0.0167748	0.0164696				6.02e-08	1.35142	0.392699
3.01e-08	0.188251	6.02e-08	0.0172741	0.0174198				6.025e-08	-1.08852	-0.039414
3.0125e-08	0.177303	6.025e-08	0.0141787	0.0167863				6.03e-08	0.879814	1.58879
3.015e-08	0.175167	6.03e-08	0.0165751	0.0188978				6.035e-08	-1.40913	1.15658
3.0175e-08	0.177837	6.035e-08	0.0136795	0.0182644				6.04e-08	-0.321508	0.404486
3.02e-08	0.182109	6.04e-08	0.0149775	0.0172086				6.045e-08	1.09264	-0.270468
3.0225e-08	0.171963	6.045e-08	0.016675	0.0162584				6.05e-08	-1.36974	0.569286
3.025e-08	0.17036	6.05e-08	0.0135796	0.0173142				6.055e-08	0.695411	-0.0277272
3.0275e-08	0.164753	6.055e-08	0.0160759	0.0164696				6.06e-08	-0.640216	-1.34774
3.03e-08	0.171696	6.06e-08	0.0143784	0.0146748				6.065e-08	0.376648	-2.11051
3.0325e-08	0.18745	6.065e-08	0.0155766	0.0136191				6.07e-08	0.257022	-1.10765
3.035e-08	0.166889	6.07e-08	0.0153769	0.014886				6.075e-08	-1.49458	-0.423821
3.0375e-08	0.168491	6.075e-08	0.0131802	0.0157306				6.08e-08	2.22139	0.745808
3.04e-08	0.166088	6.08e-08	0.0176735	0.0172086				6.085e-08	0.63013	-0.342798
3.0425e-08	0.176502	6.085e-08	0.0156765	0.0157306				6.09e-08	0.0170246	0.668635
3.045e-08	0.16235	6.09e-08	0.0148777	0.0169975				6.095e-08	-0.0234187	0.0623747
3.0475e-08	0.159413	6.095e-08	0.0147778	0.0161529				6.1e-08	0.18274	-0.221202
3.05e-08	0.173031	6.1e-08	0.0149775	0.0157306				6.105e-08	0.224782	0.876692
3.0525e-08	0.162617	6.105e-08	0.0149775	0.017103				6.11e-08	-0.641034	1.24515
3.055e-08	0.170628	6.11e-08	0.0138792	0.0175253				6.115e-08	-1.2618	-0.996161
3.0575e-08	0.167423	6.115e-08	0.0130804	0.0145693				6.12e-08	-1.13936	1.16827
3.06e-08	0.170093	6.12e-08	0.0131802	0.0173142				6.125e-08	0.227784	-1.24492
3.0625e-08	0.163151	6.125e-08	0.0147778	0.014147				6.13e-08	0.934311	-0.796427
3.065e-08	0.171963	6.13e-08	0.0155766	0.0146748				6.135e-08	1.39319	-2.81083
3.0675e-08	0.173832	6.135e-08	0.0160759	0.0120355				6.14e-08	0.602492	0.0221438
3.07e-08	0.180774	6.14e-08	0.0150774	0.015625				6.145e-08	1.31274	-1.66814
3.0725e-08	0.159947	6.145e-08	0.0158762	0.0134079				6.15e-08	-0.0667108	0.515669
3.075e-08	0.165554	6.15e-08	0.0141787	0.0161529				6.155e-08	3.15958	-0.435313
3.0775e-08	0.174366	6.155e-08	0.017973	0.014886				6.16e-08	-1.16047	0.266993
3.08e-08	0.169292	6.16e-08	0.0127808	0.0157306				6.165e-08	-1.37374	-0.27282
3.0825e-08	0.167957	6.165e-08	0.0124813	0.0149916				6.17e-08	0.013113	-0.482179
3.085e-08	0.167156	6.17e-08	0.0140789	0.0146748				6.175e-08	0.0539267	-0.526089
3.0875e-08	0.1749	6.175e-08	0.0140789	0.0145693				6.18e-08	0.263595	-0.236984
3.09e-08	0.165287	6.18e-08	0.0142786	0.014886				6.185e-08	-1.81307	-1.1164
3.0925e-08	0.163418	6.185e-08	0.0117823	0.0137247				6.19e-08	0.260156	1.18004
3.095e-08	0.169559	6.19e-08	0.0141787	0.0165752				6.195e-08	0.810657	1.13781
3.0975e-08	0.162617	6.195e-08	0.0147778	0.0164696				6.2e-08	1.87377	-0.751132
3.1e-08	0.169559	6.2e-08	0.015976	0.0140414				6.205e-08	-0.811581	-0.124193
3.1025e-08	0.179706	6.205e-08	0.0127808	0.0147804				6.21e-08	0.337792	-1.5163
3.105e-08	0.151936	6.21e-08	0.0140789	0.0129856				6.215e-08	-0.220271	-1.47907
3.1075e-08	0.161549	6.215e-08	0.0133799	0.0129856				6.22e-08	2.30542	-0.3434
3.11e-08	0.170093	6.22e-08	0.0162756	0.0143581				6.225e-08	-0.99925	-0.389177
3.1125e-08	0.161549	6.225e-08	0.0123814	0.0142525				6.23e-08	0.0709107	-1.96145
3.115e-08	0.160748	6.23e-08	0.0135796	0.0122466				6.235e-08	-0.837159	2.0654
3.1175e-08	0.158611	6.235e-08	0.0124813	0.0172086				6.24e-08	1.78996	0.0663335
3.12e-08	0.160748	6.24e-08	0.0154768	0.0146748				6.245e-08	0.449231	-1.17263
3.1225e-08	0.17036	6.245e-08	0.0138792	0.0130912				6.25e-08	0.576052	-0.367577
3.125e-08	0.159413	6.25e-08	0.013979	0.0140414				6.255e-08	2.09122	-0.927581
3.1275e-08	0.156208	6.255e-08	0.0156765	0.0133024				6.26e-08	1.96058	1.25053
3.13e-08	0.157543	6.26e-08	0.0154768	0.0159417				6.265e-08	0.523807	0.176712
3.1325e-08	0.160748	6.265e-08	0.0137793	0.0145693				6.27e-08	0.128302	-0.299461
3.135e-08	0.162617	6.27e-08	0.0132801	0.0139358				6.275e-08	0.342538	-2.15443
3.1375e-08	0.159146	6.275e-08	0.0134798	0.0116132				6.28e-08	-0.492788	0.0353998
3.14e-08	0.159947	6.28e-08	0.0124813	0.0142525				6.285e-08	0.0710449	0.850805
3.1425e-08	0.161549	6.285e-08	0.0130804	0.0152027				6.29e-08	-1.20697	1.84174
3.145e-08	0.151135	6.29e-08	0.0115826	0.016364				6.295e-08	2.61112	0.58363
3.1475e-08	0.166889	6.295e-08	0.0158762	0.0147804				6.3e-08	-1.6621	0.449315
3.15e-08	0.16502	6.3e-08	0.0109835	0.0145693				6.305e-08	-0.302546	0.488364
3.1525e-08	0.154873	6.305e-08	0.0124813	0.0145693				6.31e-08	-0.175832	-0.168936
3.155e-08	0.16235	6.31e-08	0.0125811	0.0137247				6.315e-08	1.19092	0.217987
3.1575e-08	0.151402	6.315e-08	0.0140789	0.014147				6.32e-08	-0.0986323	-0.0927294
3.16e-08	0.162884	6.32e-08	0.0125811	0.0137247				6.325e-08	-0.237884	0.382655
3.1625e-08	0.162617	6.325e-08	0.0123814	0.0142525				6.33e-08	0.868026	-0.455328
3.165e-08	0.161282	6.33e-08	0.0135796	0.0131968				6.335e-08	0.0161037	-1.12074
3.1675e-08	0.165287	6.335e-08	0.0125811	0.0123522				6.34e-08	1.8402	-1.08503
3.17e-08	0.150067	6.34e-08	0.0145781	0.0123522				6.345e-08	-0.712824	-0.873122
3.1725e-08	0.165287	6.345e-08	0.0116825	0.0125633				6.35e-08	-0.227967	-1.18987
3.175e-08	0.14713	6.35e-08	0.0121817	0.012141				6.355e-08	1.06636	1.67353
3.1775e-08	0.151936	6.355e-08	0.0135796	0.0155194				6.36e-08	-2.04064	-0.675884
3.18e-08	0.151402	6.36e-08	0.0100849	0.0126689				6.365e-08	0.245731	-0.639297
3.1825e-08	0.158344	6.365e-08	0.0125811	0.0126689				6.37e-08	-0.437481	0.285385
3.185e-08	0.150334	6.37e-08	0.0117823	0.0137247				6.375e-08	0.413076	0.857002
3.1875e-08	0.163151	6.375e-08	0.012681	0.0143581				6.38e-08	1.17564	0.00448949
3.19e-08	0.156742	6.38e-08	0.0134798	0.0133024				6.385e-08	1.75917	-0.761812
3.1925e-08	0.1498	6.385e-08	0.0140789	0.0123522				6.39e-08	0.164403	-0.726172
3.195e-08	0.145794	6.39e-08	0.0122816	0.0123522				6.395e-08	-0.707914	-1.13821
3.1975e-08	0.154606	6.395e-08	0.0112831	0.0118243				6.4e-08	-0.124889	-1.91042
3.2e-08	0.144993	6.4e-08	0.0118822	0.0108742				6.405e-08	0.460104	-0.169593
3.2025e-08	0.155674	6.405e-08	0.0124813	0.0128801				6.41e-08	-0.233331	0.767074
3.205e-08	0.159947	6.41e-08	0.0116825	0.0139358				6.415e-08	-0.287855	0.264549
3.2075e-08	0.149266	6.415e-08	0.0115826	0.0133024				6.42e-08	1.67633	-0.510665
3.21e-08	0.160748	6.42e-08	0.0136795	0.0123522				6.425e-08	-0.673747	1.60542
3.2125e-08	0.157276	6.425e-08	0.0110834	0.0147804				6.43e-08	-0.0854404	1.64454
3.215e-08	0.156208	6.43e-08	0.0116825	0.0147804				6.435e-08	0.320125	-0.312761
3.2175e-08	0.154072	6.435e-08	0.0120819	0.0124578				6.44e-08	-0.104663	-0.277029
3.22e-08	0.149266	6.44e-08	0.0115826	0.0124578				6.445e-08	0.487131	0.0318855
3.2225e-08	0.149266	6.445e-08	0.0121817	0.0127745				6.45e-08	-0.495196	0.250598
3.225e-08	0.150601	6.45e-08	0.0110834	0.0129856				6.455e-08	0.655106	-1.08281
3.2275e-08	0.146061	6.455e-08	0.0122816	0.011402				6.46e-08	0.879047	-1.23122
3.23e-08	0.150601	6.46e-08	0.0124813	0.0111909				6.465e-08	1.56967	1.64418
3.2325e-08	0.150868	6.465e-08	0.0131802	0.0144637				6.47e-08	-0.911236	0.67346
3.235e-08	0.154606	6.47e-08	0.0104843	0.0133024				6.475e-08	0.058824	1.72214
3.2375e-08	0.148198	6.475e-08	0.0114828	0.0144637				6.48e-08	-0.0921401	-0.449674
3.24e-08	0.150868	6.48e-08	0.0112831	0.0119299				6.485e-08	1.25731	0.507805
3.2425e-08	0.155407	6.485e-08	0.012681	0.0129856				6.49e-08	1.38941	1.65313
3.245e-08	0.154606	6.49e-08	0.0127808	0.0142525				6.495e-08	1.71017	-1.36297
3.2475e-08	0.1498	6.495e-08	0.0130804	0.0107686				6.5e-08	1.56047	0.617356
3.25e-08	0.156208	6.5e-08	0.0128807	0.0129856				6.505e-08	-0.478978	0.00400511
3.2525e-08	0.16235	6.505e-08	0.010684	0.0122466				6.51e-08	0.0294137	0.876914
3.255e-08	0.144993	6.51e-08	0.0111832	0.0131968				6.515e-08	0.729096	-1.13569
3.2575e-08	0.143391	6.515e-08	0.0118822	0.0108742				6.52e-08	0.386661	0.298052
3.26e-08	0.143658	6.52e-08	0.0114828	0.0124578				6.525e-08	-1.00342	-0.0399295
3.2625e-08	0.148198	6.525e-08	0.00998502	0.0120355				6.53e-08	0.65007	1.4934
3.265e-08	0.144726	6.53e-08	0.0116825	0.0137247				6.535e-08	0.114004	1.62469
3.2675e-08	0.151936	6.535e-08	0.0110834	0.0138302				6.54e-08	-0.13724	-2.00152
3.27e-08	0.148198	6.54e-08	0.0107838	0.00971284				6.545e-08	-0.963926	2.26466
3.2725e-08	0.158344	6.545e-08	0.00988517	0.0144637				6.55e-08	0.412607	0.229799
3.275e-08	0.146862	6.55e-08	0.0112831	0.012141				6.555e-08	0.0643861	-1.24534
3.2775e-08	0.156742	6.555e-08	0.0108837	0.0104519				6.56e-08	0.29242	0.300774
3.28e-08	0.141522	6.56e-08	0.0110834	0.012141				6.565e-08	-0.924883	-0.610838
3.2825e-08	0.152203	6.565e-08	0.00978532	0.0110853				6.57e-08	-1.2773	-1.5256
3.285e-08	0.148198	6.57e-08	0.00938592	0.0100296				6.575e-08	-0.373623	-0.828019
3.2875e-08	0.147664	6.575e-08	0.0102846	0.0107686				6.58e-08	1.0173	0.918713
3.29e-08	0.137784	6.58e-08	0.0116825	0.0126689				6.585e-08	1.05379	2.76632
3.2925e-08	0.134846	6.585e-08	0.0116825	0.0146748				6.59e-08	0.117996	0.60855
3.295e-08	0.146862	6.59e-08	0.010684	0.0122466				6.595e-08	0.347659	0.165596
3.2975e-08	0.145527	6.595e-08	0.0108837	0.0117188				6.6e-08	-0.20238	-1.04542
3.3e-08	0.151135	6.6e-08	0.0102846	0.0103463				6.605e-08	1.20012	1.09886
3.3025e-08	0.141789	6.605e-08	0.0116825	0.0126689				6.61e-08	1.6285	0.462185
3.305e-08	0.148198	6.61e-08	0.0120819	0.0119299				6.615e-08	0.685576	-1.62111
3.3075e-08	0.150868	6.615e-08	0.0110834	0.00960726				6.62e-08	0.132218	0.14691
3.31e-08	0.146862	6.62e-08	0.0104843	0.0115076				6.625e-08	0.757366	0.47123
3.3125e-08	0.143124	6.625e-08	0.0110834	0.0118243				6.63e-08	-0.78391	0.989859
3.315e-08	0.14526	6.63e-08	0.00948577	0.0123522				6.635e-08	-0.652367	0.249817
3.3175e-08	0.145794	6.635e-08	0.00958562	0.0115076				6.64e-08	-0.520514	0.478178
3.32e-08	0.145527	6.64e-08	0.00968547	0.0117188				6.645e-08	-0.388287	-0.459807
3.3225e-08	0.150601	6.645e-08	0.00978532	0.010663				6.65e-08	0.0420146	1.22926
3.325e-08	0.144993	6.65e-08	0.0101847	0.0124578				6.655e-08	-0.321356	-1.75968
3.3275e-08	0.143124	6.655e-08	0.00978532	0.00918497				6.66e-08	1.20563	0.128256
3.33e-08	0.151669	6.66e-08	0.0112831	0.0111909				6.665e-08	1.74052	0.847659
3.3325e-08	0.148465	6.665e-08	0.0117823	0.0119299				6.67e-08	1.17827	1.07903
3.335e-08	0.133511	6.67e-08	0.0111832	0.012141				6.675e-08	-0.987247	0.62332
3.3375e-08	0.146328	6.675e-08	0.00898652	0.0116132				6.68e-08	-0.955216	-1.01479
3.34e-08	0.144459	6.68e-08	0.00898652	0.00981841				6.685e-08	-1.82694	0.692015
3.3425e-08	0.139653	6.685e-08	0.00808787	0.0116132				6.69e-08	1.01948	0.232791
3.345e-08	0.143124	6.69e-08	0.0108837	0.0110853				6.695e-08	1.25611	1.15614
3.3475e-08	0.13271	6.695e-08	0.0110834	0.0120355				6.7e-08	1.69533	-0.393228
3.35e-08	0.132443	6.7e-08	0.0114828	0.0103463				6.705e-08	0.114361	-1.15418
3.3525e-08	0.138585	6.705e-08	0.00988517	0.00950169				6.71e-08	0.451856	0.367533
3.355e-08	0.13725	6.71e-08	0.0101847	0.0110853				6.715e-08	-0.832345	0.700013
3.3575e-08	0.140988	6.715e-08	0.00888667	0.011402				6.72e-08	1.84137	-0.760858
3.36e-08	0.143391	6.72e-08	0.0114828	0.00981841				6.725e-08	-0.462919	-0.828934
3.3625e-08	0.138585	6.725e-08	0.00918622	0.00971284				6.73e-08	-0.430617	-0.397457
3.365e-08	0.138318	6.73e-08	0.00918622	0.0101351				6.735e-08	0.82694	0.135414
3.3675e-08	0.146595	6.735e-08	0.0103844	0.010663				6.74e-08	1.06573	1.77366
3.37e-08	0.138852	6.74e-08	0.0105841	0.0123522				6.745e-08	0.997883	-2.31152
3.3725e-08	0.143124	6.745e-08	0.0104843	0.00802365				6.75e-08	0.00610481	0.0326798
3.375e-08	0.137517	6.75e-08	0.00948577	0.0104519				6.755e-08	-0.269414	-0.237122
3.3775e-08	0.13725	6.755e-08	0.00918622	0.0101351				6.76e-08	-1.26672	-0.507824
3.38e-08	0.133778	6.76e-08	0.00818772	0.00981841				6.765e-08	-0.92645	-0.779446
3.3825e-08	0.140988	6.765e-08	0.00848727	0.00950169				6.77e-08	1.99808	-0.140062
3.385e-08	0.136182	6.77e-08	0.0112831	0.0101351				6.775e-08	-0.242862	0.805668
3.3875e-08	0.140721	6.775e-08	0.00908637	0.0110853				6.78e-08	-1.24756	1.4492
3.39e-08	0.129773	6.78e-08	0.00808787	0.0117188				6.785e-08	0.0288622	0.668954
3.3925e-08	0.135381	6.785e-08	0.00928607	0.0108742				6.79e-08	-1.3952	-1.03194
3.395e-08	0.140187	6.79e-08	0.00788817	0.00907939				6.795e-08	-0.635927	1.45038
3.3975e-08	0.138318	6.795e-08	0.00858712	0.0116132				6.8e-08	1.79585	-0.561893
3.4e-08	0.139386	6.8e-08	0.0108837	0.00950169				6.805e-08	-0.155295	0.494275
3.4025e-08	0.143391	6.805e-08	0.00898652	0.0105574				6.81e-08	-0.332688	0.116521
3.405e-08	0.142323	6.81e-08	0.00878682	0.0101351				6.815e-08	0.223632	-0.673866
3.4075e-08	0.146595	6.815e-08	0.00928607	0.00929054				6.82e-08	1.20208	0.593227
3.41e-08	0.138051	6.82e-08	0.0101847	0.0105574				6.825e-08	0.183646	-1.64387
3.4125e-08	0.152203	6.825e-08	0.00918622	0.0082348				6.83e-08	-0.311346	-0.478096
3.415e-08	0.126035	6.83e-08	0.00868697	0.00939611				6.835e-08	-0.174537	-0.240347
3.4175e-08	0.137517	6.835e-08	0.00878682	0.00960726				6.84e-08	-1.94162	-0.416665
3.42e-08	0.144726	6.84e-08	0.00708937	0.00939611				6.845e-08	-0.853566	1.69118
3.4225e-08	0.14259	6.845e-08	0.00808787	0.0115076				6.85e-08	0.344247	-1.91542
3.425e-08	0.130574	6.85e-08	0.00918622	0.0078125				6.855e-08	-0.474073	-0.74092
3.4275e-08	0.130841	6.855e-08	0.00838742	0.00897382				6.86e-08	0.0893734	-0.710592
3.43e-08	0.130574	6.86e-08	0.00888667	0.00897382				6.865e-08	-0.945539	-1.62103
3.4325e-08	0.138318	6.865e-08	0.00788817	0.00802365				6.87e-08	-0.167356	0.502019
3.435e-08	0.127904	6.87e-08	0.00858712	0.0101351				6.875e-08	0.934351	-2.19278
3.4375e-08	0.13992	6.875e-08	0.00958562	0.0073902				6.88e-08	0.538322	1.40652
3.44e-08	0.142056	6.88e-08	0.00918622	0.0109797				6.885e-08	0.0333421	1.54497
3.4425e-08	0.13725	6.885e-08	0.00868697	0.0110853				6.89e-08	0.0644606	-0.95111
3.445e-08	0.144459	6.89e-08	0.00868697	0.00855152				6.895e-08	0.418906	0.239462
3.4475e-08	0.131909	6.895e-08	0.00898652	0.00971284				6.9e-08	1.31422	1.75111
3.45e-08	0.140454	6.9e-08	0.00978532	0.0111909				6.905e-08	-1.57181	1.46719
3.4525e-08	0.13725	6.905e-08	0.00708937	0.0108742				6.91e-08	1.16435	0.757984
3.455e-08	0.142857	6.91e-08	0.00958562	0.0101351				6.915e-08	-1.29775	-0.378622
3.4575e-08	0.131642	6.915e-08	0.00728907	0.00897382				6.92e-08	-1.26879	-0.0289784
3.46e-08	0.128438	6.92e-08	0.00728907	0.00929054				6.925e-08	0.175163	1.8141
3.4625e-08	0.125234	6.925e-08	0.00858712	0.0110853				6.93e-08	-0.884199	-0.822015
3.465e-08	0.125234	6.93e-08	0.00758862	0.00844595				6.935e-08	-0.964329	0.704442
3.4675e-08	0.131909	6.935e-08	0.00748877	0.00992399				6.94e-08	-1.26365	0.200272
3.47e-08	0.135648	6.94e-08	0.00718922	0.00939611				6.945e-08	-0.687352	-1.48594
3.4725e-08	0.123632	6.945e-08	0.00768847	0.00770693				6.95e-08	1.20805	-0.920603
3.475e-08	0.138051	6.95e-08	0.00938592	0.0082348				6.955e-08	0.470954	-1.42999
3.4775e-08	0.123899	6.955e-08	0.00868697	0.00770693				6.96e-08	-0.378771	-0.215738
3.48e-08	0.128438	6.96e-08	0.00788817	0.00886824				6.965e-08	0.864757	-0.293635
3.4825e-08	0.128171	6.965e-08	0.00898652	0.00876267				6.97e-08	0.454764	-1.56195
3.485e-08	0.128171	6.97e-08	0.00858712	0.00749578				6.975e-08	0.153843	-0.125567
3.4875e-08	0.121762	6.975e-08	0.00828757	0.00886824				6.98e-08	-0.0374977	0.338375
3.49e-08	0.128705	6.98e-08	0.00808787	0.00929054				6.985e-08	-0.451814	-0.392238
3.4925e-08	0.12737	6.985e-08	0.00768847	0.00855152				6.99e-08	-0.75638	0.508069
3.495e-08	0.122296	6.99e-08	0.00738892	0.00939611				6.995e-08	-0.504848	-0.661067
3.4975e-08	0.122563	6.995e-08	0.00758862	0.0082348				7e-08	0.975319	1.11563
3.5e-08	0.134579	7e-08	0.00888667	0.00992399				7.005e-08	0.447891	1.58501
3.5025e-08	0.134045	7.005e-08	0.00838742	0.0103463				7.01e-08	-1.53725	-0.903392
3.505e-08	0.126836	7.01e-08	0.00659011	0.00791807				7.015e-08	-0.163583	0.33268
3.5075e-08	0.126569	7.015e-08	0.00778832	0.00907939				7.02e-08	-0.920449	2.01256
3.51e-08	0.12737	7.02e-08	0.00708937	0.010663				7.025e-08	0.120901	1.05423
3.5125e-08	0.132443	7.025e-08	0.00798802	0.00971284				7.03e-08	0.714458	0.0924847
3.515e-08	0.12737	7.03e-08	0.00848727	0.00876267				7.035e-08	-2.19126	0.0114559
3.5175e-08	0.128171	7.035e-08	0.00589116	0.00865709				7.04e-08	-0.129275	-0.401973
3.52e-08	0.131642	7.04e-08	0.00768847	0.0082348				7.045e-08	1.14632	0.180947
3.5225e-08	0.124433	7.045e-08	0.00878682	0.00876267				7.05e-08	-1.31941	1.7651
3.525e-08	0.123364	7.05e-08	0.00659011	0.0102407				7.055e-08	-1.17849	-1.20566
3.5275e-08	0.119893	7.055e-08	0.00668997	0.0073902				7.06e-08	-0.353835	0.826985
3.53e-08	0.125234	7.06e-08	0.00738892	0.00929054				7.065e-08	-0.553075	-1.48555
3.5325e-08	0.126035	7.065e-08	0.00718922	0.00707348				7.07e-08	-1.78145	0.888481
3.535e-08	0.12016	7.07e-08	0.00609086	0.00929054				7.075e-08	0.0761576	0.135423
3.5375e-08	0.128171	7.075e-08	0.00768847	0.00855152				7.08e-08	-1.27041	1.51015
3.54e-08	0.122029	7.08e-08	0.00649026	0.00981841				7.085e-08	1.51248	-0.143298
3.5425e-08	0.130307	7.085e-08	0.00888667	0.0082348				7.09e-08	2.11896	-0.452259
3.545e-08	0.138318	7.09e-08	0.00938592	0.00791807				7.095e-08	-0.153052	0.589851
3.5475e-08	0.122029	7.095e-08	0.00738892	0.00886824				7.1e-08	1.49128	-1.18617
3.55e-08	0.119092	7.1e-08	0.00878682	0.00717905				7.105e-08	-0.211382	-0.254943
3.5525e-08	0.122029	7.105e-08	0.00728907	0.00802365				7.11e-08	0.164574	-0.566194
3.555e-08	0.115621	7.11e-08	0.00758862	0.00770693				7.115e-08	0.541778	-1.67237
3.5575e-08	0.115354	7.115e-08	0.00788817	0.00665118				7.12e-08	-1.51971	1.08006
3.56e-08	0.121762	7.12e-08	0.00609086	0.00918497				7.125e-08	-1.14436	1.56558
3.5625e-08	0.136716	7.125e-08	0.00639041	0.00960726				7.13e-08	0.281131	-0.568844
3.565e-08	0.121228	7.13e-08	0.00758862	0.00760135				7.135e-08	2.52852	-0.541472
3.5675e-08	0.123632	7.135e-08	0.00948577	0.00760135				7.14e-08	-0.47991	-0.514104
3.57e-08	0.131375	7.14e-08	0.00688967	0.00760135				7.145e-08	-0.100948	1.34562
3.5725e-08	0.124433	7.145e-08	0.00718922	0.00929054				7.15e-08	0.983323	1.37607
3.575e-08	0.138585	7.15e-08	0.00808787	0.00929054				7.155e-08	1.71856	-1.00612
3.5775e-08	0.125234	7.155e-08	0.00868697	0.00707348				7.16e-08	-0.84042	-0.288957
3.58e-08	0.126569	7.16e-08	0.00649026	0.00770693				7.165e-08	-0.459598	-1.06794
3.5825e-08	0.123364	7.165e-08	0.00678982	0.00696791				7.17e-08	0.394957	0.690449
3.585e-08	0.124433	7.17e-08	0.00748877	0.00855152				7.175e-08	0.423837	0.719687
3.5875e-08	0.136983	7.175e-08	0.00748877	0.00855152				7.18e-08	2.23044	1.44373
3.59e-08	0.121495	7.18e-08	0.00898652	0.00918497				7.185e-08	1.78709	0.313689
3.5925e-08	0.126836	7.185e-08	0.00858712	0.00812922				7.19e-08	2.17458	1.27155
3.595e-08	0.12016	7.19e-08	0.00888667	0.00897382				7.195e-08	-1.01014	-1.95758
3.5975e-08	0.126569	7.195e-08	0.00619071	0.00601774				7.2e-08	1.99878	0.165427
3.6e-08	0.116689	7.2e-08	0.00868697	0.00791807				7.205e-08	-0.479787	-0.507116
3.6025e-08	0.128705	7.205e-08	0.00659011	0.00728463				7.21e-08	1.82176	0.338588
3.605e-08	0.128438	7.21e-08	0.00848727	0.00802365				7.215e-08	-0.0658509	-0.687336
3.6075e-08	0.12737	7.215e-08	0.00688967	0.00707348				7.22e-08	0.562458	-0.777993
3.61e-08	0.122029	7.22e-08	0.00738892	0.00696791				7.225e-08	0.952025	-0.869167
3.6125e-08	0.1247	7.225e-08	0.00768847	0.00686233				7.23e-08	-0.344516	0.334028
3.615e-08	0.119359	7.23e-08	0.00659011	0.00791807				7.235e-08	0.647919	-0.699313
3.6175e-08	0.128171	7.235e-08	0.00738892	0.00696791				7.24e-08	-0.895526	1.68875
3.62e-08	0.112417	7.24e-08	0.00609086	0.00907939				7.245e-08	-0.385314	-0.173882
3.6225e-08	0.1247	7.245e-08	0.00649026	0.0073902				7.25e-08	1.58223	-0.502332
3.625e-08	0.12016	7.25e-08	0.00808787	0.00707348				7.255e-08	-0.574965	-0.357179
3.6275e-08	0.129773	7.255e-08	0.00629056	0.00717905				7.26e-08	2.37246	0.263887
3.63e-08	0.117223	7.26e-08	0.00868697	0.00770693				7.265e-08	1.30659	1.48223
3.6325e-08	0.111348	7.265e-08	0.00778832	0.00876267				7.27e-08	2.19093	2.46595
3.635e-08	0.11482	7.27e-08	0.00848727	0.00960726				7.275e-08	-0.346938	0.227651
3.6375e-08	0.112417	7.275e-08	0.00639041	0.00760135				7.28e-08	1.14972	0.374576
3.64e-08	0.119359	7.28e-08	0.00758862	0.00770693				7.285e-08	-0.294229	0.641634
3.6425e-08	0.12737	7.285e-08	0.00639041	0.00791807				7.29e-08	-1.62011	-0.530768
3.645e-08	0.115087	7.29e-08	0.00529206	0.00686233				7.295e-08	-0.980382	-0.0240153
3.6475e-08	0.115621	7.295e-08	0.00579131	0.00728463				7.3e-08	-0.955222	-0.719709
3.65e-08	0.12016	7.3e-08	0.00579131	0.00665118				7.305e-08	-0.929995	-0.694063
3.6525e-08	0.124433	7.305e-08	0.00579131	0.00665118				7.31e-08	0.332693	0.0564299
3.655e-08	0.116155	7.31e-08	0.00678982	0.00728463				7.315e-08	0.236177	-2.09446
3.6575e-08	0.119893	7.315e-08	0.00668997	0.00538429				7.32e-08	-0.729792	0.837472
3.66e-08	0.119626	7.32e-08	0.00589116	0.00791807				7.325e-08	-0.0825332	0.13716
3.6625e-08	0.115354	7.325e-08	0.00639041	0.00728463				7.33e-08	1.9368	1.25803
3.665e-08	0.127637	7.33e-08	0.00798802	0.0082348				7.335e-08	-0.404247	0.921051
3.6675e-08	0.123364	7.335e-08	0.00609086	0.00791807				7.34e-08	2.74564	-1.24663
3.67e-08	0.125234	7.34e-08	0.00858712	0.00601774				7.345e-08	-0.47817	-0.367198
3.6725e-08	0.12283	7.345e-08	0.00599101	0.00675676				7.35e-08	0.424999	0.147954
3.675e-08	0.116689	7.35e-08	0.00668997	0.00717905				7.355e-08	0.452012	-0.560825
3.6775e-08	0.115354	7.355e-08	0.00668997	0.00654561				7.36e-08	0.7307	-0.289856
3.68e-08	0.110547	7.36e-08	0.00688967	0.00675676				7.365e-08	-0.249758	0.965612
3.6825e-08	0.109746	7.365e-08	0.00609086	0.0078125				7.37e-08	-0.35004	-0.361182
3.685e-08	0.112951	7.37e-08	0.00599101	0.00665118				7.375e-08	0.686963	0.897926
3.6875e-08	0.119359	7.375e-08	0.00678982	0.00770693				7.38e-08	0.334181	-1.17502
3.69e-08	0.119359	7.38e-08	0.00649026	0.00591216				7.385e-08	1.24845	0.333928
3.6925e-08	0.118558	7.385e-08	0.00718922	0.00717905				7.39e-08	0.132859	0.732108
3.695e-08	0.11482	7.39e-08	0.00629056	0.00749578				7.395e-08	-0.477423	-1.47551
3.6975e-08	0.130841	7.395e-08	0.00579131	0.00559544				7.4e-08	-2.23691	0.53745
3.7e-08	0.114286	7.4e-08	0.00439341	0.00728463				7.405e-08	-0.0443151	-0.0585448
3.7025e-08	0.104139	7.405e-08	0.00609086	0.00675676				7.41e-08	1.26032	0.715719
3.705e-08	0.110013	7.41e-08	0.00708937	0.0073902				7.415e-08	-0.24887	1.11763
3.7075e-08	0.116956	7.415e-08	0.00589116	0.00770693				7.42e-08	1.18798	-0.231327
3.71e-08	0.119626	7.42e-08	0.00698952	0.00654561				7.425e-08	-1.09774	1.92494
3.7125e-08	0.111348	7.425e-08	0.00519221	0.00834037				7.43e-08	0.0845495	-1.31078
3.715e-08	0.116956	7.43e-08	0.00609086	0.00559544				7.435e-08	1.01265	0.221522
3.7175e-08	0.109212	7.435e-08	0.00678982	0.00686233				7.44e-08	0.135542	1.25483
3.72e-08	0.118825	7.44e-08	0.00609086	0.00770693				7.445e-08	0.80788	-0.105492
3.7225e-08	0.115354	7.445e-08	0.00659011	0.00654561				7.45e-08	-0.849969	0.67783
3.725e-08	0.107877	7.45e-08	0.00529206	0.00717905				7.455e-08	0.342074	0.451198
3.7275e-08	0.113752	7.455e-08	0.00619071	0.00696791				7.46e-08	1.53804	1.36468
3.73e-08	0.115888	7.46e-08	0.00708937	0.00770693				7.465e-08	-0.257061	-1.40091
3.7325e-08	0.110547	7.465e-08	0.00569146	0.00538429				7.47e-08	-0.101676	-0.106064
3.735e-08	0.112417	7.47e-08	0.00579131	0.00644003				7.475e-08	0.576617	0.555871
3.7375e-08	0.116689	7.475e-08	0.00629056	0.00696791				7.48e-08	0.210004	0.326649
3.74e-08	0.120694	7.48e-08	0.00599101	0.00675676				7.485e-08	-2.51733	-1.43683
3.7425e-08	0.112684	7.485e-08	0.00389416	0.00527872				7.49e-08	0.391748	-0.134381
3.745e-08	0.104139	7.49e-08	0.00609086	0.00633446				7.495e-08	1.33773	-0.366081
3.7475e-08	0.107343	7.495e-08	0.00678982	0.00612331				7.5e-08	-1.00615	0.300211
3.75e-08	0.107877	7.5e-08	0.00499251	0.00665118				7.505e-08	-0.0594016	0.711427
3.7525e-08	0.116155	7.505e-08	0.00569146	0.00696791				7.51e-08	1.5512	-0.164098
3.755e-08	0.118558	7.51e-08	0.00688967	0.00622889				7.515e-08	0.519749	1.15076
3.7575e-08	0.106008	7.515e-08	0.00609086	0.00728463				7.52e-08	1.34103	-0.502311
3.76e-08	0.100401	7.52e-08	0.00668997	0.00591216				7.525e-08	0.0399424	0.0393748
3.7625e-08	0.111883	7.525e-08	0.00569146	0.00633446				7.53e-08	-0.0684531	0.712204
3.765e-08	0.118825	7.53e-08	0.00559161	0.00686233				7.535e-08	0.622052	-0.300898
3.7675e-08	0.100401	7.535e-08	0.00609086	0.00601774				7.54e-08	1.84852	-0.406978
3.77e-08	0.101202	7.54e-08	0.00698952	0.00591216				7.545e-08	-1.59955	2.35214
3.7725e-08	0.102804	7.545e-08	0.00439341	0.00812922				7.55e-08	0.430548	-0.881173
3.775e-08	0.113218	7.55e-08	0.00589116	0.00548986				7.555e-08	1.2603	-0.0740755
3.7775e-08	0.117223	7.555e-08	0.00649026	0.00612331				7.56e-08	-0.0564692	0.0812064
3.78e-08	0.119092	7.56e-08	0.00549176	0.00622889				7.565e-08	0.775194	0.10588
3.7825e-08	0.116155	7.565e-08	0.00609086	0.00622889				7.57e-08	1.20522	0.655747
3.785e-08	0.110547	7.57e-08	0.00639041	0.00665118				7.575e-08	-1.06336	0.155089
3.7875e-08	0.109212	7.575e-08	0.00469296	0.00622889				7.58e-08	0.581537	0.179489
3.79e-08	0.108945	7.58e-08	0.00589116	0.00622889				7.585e-08	-1.56042	0.0718912
3.7925e-08	0.0990654	7.585e-08	0.00429356	0.00612331				7.59e-08	0.360055	-0.961084
3.795e-08	0.107877	7.59e-08	0.00569146	0.00527872				7.595e-08	0.248677	0.384859
3.7975e-08	0.102537	7.595e-08	0.00559161	0.00633446				7.6e-08	-0.67963	-0.120735
3.8e-08	0.106275	7.6e-08	0.00489266	0.00591216				7.605e-08	0.297397	-1.02626
3.8025e-08	0.114019	7.605e-08	0.00559161	0.00517314				7.61e-08	0.321863	-1.40276
3.805e-08	0.113752	7.61e-08	0.00559161	0.00485642				7.615e-08	0.07288	-0.581747
3.8075e-08	0.10494	7.615e-08	0.00539191	0.00548986				7.62e-08	0.096981	1.44249
3.81e-08	0.109212	7.62e-08	0.00539191	0.00707348				7.625e-08	1.35584	0.132481
3.8125e-08	0.103071	7.625e-08	0.00629056	0.00601774				7.63e-08	0.557112	-1.71724
3.815e-08	0.0913218	7.63e-08	0.00569146	0.0045397				7.635e-08	1.13215	0.448357
3.8175e-08	0.111081	7.635e-08	0.00609086	0.00622889				7.64e-08	0.743823	-0.332898
3.82e-08	0.110013	7.64e-08	0.00579131	0.00559544				7.645e-08	1.32088	0.900362
3.8225e-08	0.10761	7.645e-08	0.00619071	0.00654561				7.65e-08	-0.451695	0.656016
3.825e-08	0.103872	7.65e-08	0.00489266	0.00633446				7.655e-08	-0.706025	-1.07298
3.8275e-08	0.108144	7.655e-08	0.00469296	0.00496199				7.66e-08	0.0102205	0.705406
3.83e-08	0.110013	7.66e-08	0.00519221	0.00633446				7.665e-08	-0.522207	0.459545
3.8325e-08	0.110814	7.665e-08	0.00479281	0.00612331				7.67e-08	-0.360302	0.619445
3.835e-08	0.104139	7.67e-08	0.00489266	0.00622889				7.675e-08	-0.755865	1.86573
3.8375e-08	0.109479	7.675e-08	0.00459311	0.00717905				7.68e-08	0.383562	-0.283621
3.84e-08	0.100134	7.68e-08	0.00539191	0.00548986				7.685e-08	-0.292265	-0.260883
3.8425e-08	0.106542	7.685e-08	0.00489266	0.00548986				7.69e-08	0.150687	-0.647361
3.845e-08	0.121228	7.69e-08	0.00519221	0.00517314				7.695e-08	-0.106767	0.467718
3.8475e-08	0.110013	7.695e-08	0.00499251	0.00601774				7.7e-08	1.04077	0.217949
3.85e-08	0.103338	7.7e-08	0.00579131	0.00580659				7.705e-08	1.06552	-0.717889
3.8525e-08	0.101202	7.705e-08	0.00579131	0.00506757				7.71e-08	0.244089	-0.0094577
3.855e-08	0.108678	7.71e-08	0.00519221	0.00559544				7.715e-08	-1.71021	-0.123725
3.8575e-08	0.102804	7.715e-08	0.00379431	0.00548986				7.72e-08	-0.274882	-1.75325
3.86e-08	0.118558	7.72e-08	0.00479281	0.00422297				7.725e-08	-0.81931	1.43936
3.8625e-08	0.113485	7.725e-08	0.00439341	0.00665118				7.73e-08	-1.36571	0.221187
3.865e-08	0.101202	7.73e-08	0.00399401	0.00570101				7.735e-08	1.07197	1.48957
3.8675e-08	0.106542	7.735e-08	0.00569146	0.00665118				7.74e-08	0.241779	-0.425494
3.87e-08	0.113218	7.74e-08	0.00509236	0.00517314				7.745e-08	-0.876427	-1.51384
3.8725e-08	0.0998665	7.745e-08	0.00429356	0.00432855				7.75e-08	1.00217	0.5918
3.875e-08	0.103605	7.75e-08	0.00559161	0.00591216				7.755e-08	1.59885	3.12181
3.8775e-08	0.0971963	7.755e-08	0.00599101	0.0078125				7.76e-08	0.620712	-0.0580213
3.88e-08	0.110013	7.76e-08	0.00529206	0.00538429				7.765e-08	-0.0734703	-0.174979
3.8825e-08	0.106008	7.765e-08	0.00479281	0.00527872				7.77e-08	0.380489	0.127325
3.885e-08	0.119092	7.77e-08	0.00509236	0.00548986				7.775e-08	0.691704	-0.270231
3.8875e-08	0.0961282	7.775e-08	0.00529206	0.00517314				7.78e-08	0.282341	0.0324912
3.89e-08	0.103605	7.78e-08	0.00499251	0.00538429				7.785e-08	0.160512	0.476598
3.8925e-08	0.0977303	7.785e-08	0.00489266	0.00570101				7.79e-08	0.327676	-1.33058
3.895e-08	0.100668	7.79e-08	0.00499251	0.00432855				7.795e-08	-1.38926	0.240742
3.8975e-08	0.105207	7.795e-08	0.00379431	0.00548986				7.8e-08	0.227897	2.24069
3.9e-08	0.100134	7.8e-08	0.00489266	0.00696791				7.805e-08	0.68677	-1.26978
3.9025e-08	0.108945	7.805e-08	0.00519221	0.00432855				7.81e-08	0.418766	-1.24941
3.905e-08	0.102537	7.81e-08	0.00499251	0.00432855				7.815e-08	0.733512	1.18338
3.9075e-08	0.0977303	7.815e-08	0.00519221	0.00612331				7.82e-08	-0.558367	-1.20858
3.91e-08	0.111348	7.82e-08	0.00429356	0.00432855				7.825e-08	-0.683557	0.235258
3.9125e-08	0.0998665	7.825e-08	0.00419371	0.00538429				7.83e-08	0.363571	-0.882943
3.915e-08	0.100668	7.83e-08	0.00489266	0.0045397				7.835e-08	2.0013	-1.14798
3.9175e-08	0.109479	7.835e-08	0.00599101	0.00432855				7.84e-08	0.555409	0.731444
3.92e-08	0.101736	7.84e-08	0.00499251	0.00570101				7.845e-08	-0.600519	0.0382596
3.9225e-08	0.106008	7.845e-08	0.00419371	0.00517314				7.85e-08	-0.87484	0.490664
3.925e-08	0.100935	7.85e-08	0.00399401	0.00548986				7.855e-08	-0.411088	1.08818
3.9275e-08	0.100134	7.855e-08	0.00429356	0.00591216				7.86e-08	0.79431	1.25581
3.93e-08	0.103872	7.86e-08	0.00509236	0.00601774				7.865e-08	-0.665286	-0.450062
3.9325e-08	0.107877	7.865e-08	0.00409386	0.00475084				7.87e-08	1.13758	-1.87265
3.935e-08	0.107343	7.87e-08	0.00529206	0.0036951				7.875e-08	-0.772669	0.17075
3.9375e-08	0.101469	7.875e-08	0.00399401	0.00517314				7.88e-08	0.737483	0.916846
3.94e-08	0.103338	7.88e-08	0.00499251	0.00570101				7.885e-08	-0.284532	0.504638
3.9425e-08	0.105474	7.885e-08	0.00429356	0.00538429				7.89e-08	1.08153	-0.490089
3.945e-08	0.0985314	7.89e-08	0.00519221	0.00464527				7.895e-08	-0.991247	0.694787
3.9475e-08	0.105474	7.895e-08	0.00379431	0.00548986				7.9e-08	0.228044	-0.885789
3.95e-08	0.0971963	7.9e-08	0.00459311	0.00432855				7.905e-08	0.850503	-0.865632
3.9525e-08	0.111081	7.905e-08	0.00499251	0.00432855				7.91e-08	0.722841	1.20143
3.955e-08	0.100668	7.91e-08	0.00489266	0.00580659				7.915e-08	-0.761235	-0.385856
3.9575e-08	0.105741	7.915e-08	0.00389416	0.00464527				7.92e-08	0.617111	-0.0715802
3.96e-08	0.093992	7.92e-08	0.00479281	0.00485642				7.925e-08	1.09282	-1.22546
3.9625e-08	0.100401	7.925e-08	0.00509236	0.00401182				7.93e-08	1.56984	-0.0291116
3.965e-08	0.0947931	7.93e-08	0.00539191	0.00485642				7.935e-08	0.0769884	-0.302711
3.9675e-08	0.0995995	7.935e-08	0.00439341	0.00464527				7.94e-08	1.31304	0.898612
3.97e-08	0.0934579	7.94e-08	0.00519221	0.00548986				7.945e-08	1.33605	0.477687
3.9725e-08	0.104673	7.945e-08	0.00519221	0.00517314				7.95e-08	0.597329	-0.0926162
3.975e-08	0.0982644	7.95e-08	0.00469296	0.00475084				7.955e-08	0.16144	0.22495
3.9775e-08	0.11215	7.955e-08	0.00439341	0.00496199				7.96e-08	0.641224	2.77117
3.98e-08	0.103605	7.96e-08	0.00469296	0.00675676				7.965e-08	-0.86765	2.20176
3.9825e-08	0.0915888	7.965e-08	0.00369446	0.00633446				7.97e-08	-0.388044	-1.05115
3.985e-08	0.0985314	7.97e-08	0.00399401	0.00401182				7.975e-08	0.40011	-1.03178
3.9875e-08	0.0979973	7.975e-08	0.00449326	0.00401182				7.98e-08	-0.0400393	0.183032
3.99e-08	0.0915888	7.98e-08	0.00419371	0.00485642				7.985e-08	0.904911	-2.63978
3.9925e-08	0.0929239	7.985e-08	0.00479281	0.00285051				7.99e-08	-0.770586	-1.57378
3.995e-08	0.0987984	7.99e-08	0.00369446	0.00358953				7.995e-08	-0.596719	0.546503
3.9975e-08	0.0995995	7.995e-08	0.00379431	0.00506757				8e-08	-1.04154	1.62074
4e-08	0.103071	8e-08	0.00349476	0.00580659				8.005e-08	0.993034	0.288535
4.0025e-08	0.104139	8.005e-08	0.00479281	0.00485642				8.01e-08	0.238711	3.93013
4.005e-08	0.101202	8.01e-08	0.00429356	0.0073902				8.015e-08	-0.829134	-0.72651
4.0075e-08	0.0982644	8.015e-08	0.00359461	0.0041174				8.02e-08	0.124911	-0.252912
4.01e-08	0.0931909	8.02e-08	0.00419371	0.00443412				8.025e-08	1.2379	0.070443
4.0125e-08	0.10227	8.025e-08	0.00489266	0.00464527				8.03e-08	0.478693	2.21614
4.015e-08	0.0902537	8.03e-08	0.00439341	0.00612331				8.035e-08	0.0300223	1.78388
4.0175e-08	0.0921228	8.035e-08	0.00409386	0.00580659				8.04e-08	1.4613	0.436618
4.02e-08	0.0902537	8.04e-08	0.00499251	0.00485642				8.045e-08	0.0704314	0.152647
4.0225e-08	0.0950601	8.045e-08	0.00409386	0.00464527				8.05e-08	-1.79671	-0.437699
4.025e-08	0.103872	8.05e-08	0.00289566	0.00422297				8.055e-08	0.426072	0.346885
4.0275e-08	0.0910547	8.055e-08	0.00429356	0.00475084				8.06e-08	-0.341975	-1.62395
4.03e-08	0.0921228	8.06e-08	0.00379431	0.00337838				8.065e-08	-0.322303	-1.14569
4.0325e-08	0.103605	8.065e-08	0.00379431	0.0036951				8.07e-08	-0.144334	-0.0512338
4.035e-08	0.100134	8.07e-08	0.00389416	0.00443412				8.075e-08	-1.39281	1.50828
4.0375e-08	0.0910547	8.075e-08	0.00309536	0.00548986				8.08e-08	0.84797	-0.0110012
4.04e-08	0.0995995	8.08e-08	0.00449326	0.00443412				8.085e-08	-0.0851295	-2.30716
4.0425e-08	0.0987984	8.085e-08	0.00389416	0.00285051				8.09e-08	-0.861955	-0.434956
4.045e-08	0.0934579	8.09e-08	0.00339491	0.0041174				8.095e-08	1.7091	0.203903
4.0475e-08	0.105207	8.095e-08	0.00499251	0.0045397				8.1e-08	-1.14471	0.0690833
4.05e-08	0.0899866	8.1e-08	0.00319521	0.00443412				8.105e-08	0.633764	-0.998378
4.0525e-08	0.0902537	8.105e-08	0.00429356	0.0036951				8.11e-08	-0.14692	-0.357449
4.055e-08	0.10227	8.11e-08	0.00379431	0.0041174				8.115e-08	2.12044	-0.0262432
4.0575e-08	0.0795728	8.115e-08	0.00519221	0.00432855				8.12e-08	-1.23339	1.24251
4.06e-08	0.104406	8.12e-08	0.00309536	0.00517314				8.125e-08	0.233931	-0.455413
4.0625e-08	0.0921228	8.125e-08	0.00399401	0.00401182				8.13e-08	1.7057	1.28601
4.065e-08	0.0995995	8.13e-08	0.00489266	0.00517314				8.135e-08	-0.0494826	0.209884
4.0675e-08	0.093992	8.135e-08	0.00379431	0.00443412				8.14e-08	-0.0301775	-0.24137
4.07e-08	0.0915888	8.14e-08	0.00379431	0.0041174				8.145e-08	0.313306	2.45206
4.0725e-08	0.0923899	8.145e-08	0.00399401	0.00591216				8.15e-08	-0.316151	-1.14814
4.075e-08	0.094526	8.15e-08	0.00359461	0.00348395				8.155e-08	0.0279351	-0.499102
4.0775e-08	0.0953271	8.155e-08	0.00379431	0.00390625				8.16e-08	1.51303	0.942133
4.08e-08	0.0985314	8.16e-08	0.00469296	0.00485642				8.165e-08	0.719353	0.488435
4.0825e-08	0.0891856	8.165e-08	0.00419371	0.0045397				8.17e-08	0.0864701	0.508845
4.085e-08	0.0921228	8.17e-08	0.00379431	0.0045397				8.175e-08	0.269538	1.4818
4.0875e-08	0.0905207	8.175e-08	0.00389416	0.00517314				8.18e-08	-1.34966	-0.0867436
4.09e-08	0.0958611	8.18e-08	0.00289566	0.0041174				8.185e-08	-1.00444	0.4102
4.0925e-08	0.0913218	8.185e-08	0.00309536	0.00443412				8.19e-08	1.80763	-0.36746
4.095e-08	0.0846462	8.19e-08	0.00479281	0.00390625				8.195e-08	-0.4756	-0.508528
4.0975e-08	0.0867824	8.195e-08	0.00339491	0.00380068				8.2e-08	0.037382	-0.170049
4.1e-08	0.0899866	8.2e-08	0.00369446	0.00401182				8.205e-08	-1.59517	-0.95226
4.1025e-08	0.094259	8.205e-08	0.00269596	0.00348395				8.21e-08	-1.08235	0.510024
4.105e-08	0.102003	8.21e-08	0.00299551	0.00443412				8.215e-08	-0.567926	0.0479089
4.1075e-08	0.0899866	8.215e-08	0.00329506	0.0041174				8.22e-08	-1.7114	2.48216
4.11e-08	0.103872	8.22e-08	0.00259611	0.00570101				8.225e-08	1.13039	0.247771
4.1125e-08	0.0849132	8.225e-08	0.00429356	0.00422297				8.23e-08	0.485072	1.2361
4.115e-08	0.0859813	8.23e-08	0.00389416	0.00485642				8.235e-08	0.171063	-0.845646
4.1175e-08	0.0953271	8.235e-08	0.00369446	0.00348395				8.24e-08	-1.98085	0.95377
4.12e-08	0.0969292	8.24e-08	0.00239641	0.00464527				8.245e-08	1.21238	1.13636
4.1225e-08	0.0886515	8.245e-08	0.00429356	0.00475084				8.25e-08	-1.6147	0.669567
4.125e-08	0.0841121	8.25e-08	0.00259611	0.00443412				8.255e-08	-1.09525	0.689525
4.1275e-08	0.100935	8.255e-08	0.00289566	0.00443412				8.26e-08	0.434009	0.383578
4.13e-08	0.0886515	8.26e-08	0.00379431	0.00422297				8.265e-08	0.789995	0.729605
4.1325e-08	0.0867824	8.265e-08	0.00399401	0.00443412				8.27e-08	-0.0328827	1.89406
4.135e-08	0.10494	8.27e-08	0.00349476	0.00517314				8.275e-08	0.154465	-0.212806
4.1375e-08	0.0910547	8.275e-08	0.00359461	0.00380068				8.28e-08	-1.01049	1.6094
4.14e-08	0.0934579	8.28e-08	0.00289566	0.00496199				8.285e-08	0.869135	0.973477
4.1425e-08	0.0849132	8.285e-08	0.00399401	0.0045397				8.29e-08	-0.97698	-1.6383
4.145e-08	0.0921228	8.29e-08	0.00289566	0.00285051				8.295e-08	0.568668	2.33148
4.1475e-08	0.0814419	8.295e-08	0.00379431	0.00538429				8.3e-08	1.2684	-1.44119
4.15e-08	0.101469	8.3e-08	0.00419371	0.00295608				8.305e-08	2.14071	-1.09433
4.1525e-08	0.093725	8.305e-08	0.00469296	0.00316723				8.31e-08	0.455664	0.412065
4.155e-08	0.0838451	8.31e-08	0.00369446	0.0041174				8.315e-08	2.35506	-1.39197
4.1575e-08	0.0934579	8.315e-08	0.00479281	0.00295608				8.32e-08	0.493797	3.1067
4.16e-08	0.0947931	8.32e-08	0.00369446	0.00580659				8.325e-08	-0.00164204	0.137177
4.1625e-08	0.0870494	8.325e-08	0.00339491	0.00390625				8.33e-08	-1.70098	-0.843397
4.165e-08	0.0846462	8.33e-08	0.00239641	0.0032728				8.335e-08	0.722449	0.674482
4.1675e-08	0.0987984	8.335e-08	0.00379431	0.00422297				8.34e-08	0.224682	0.860731
4.17e-08	0.0875834	8.34e-08	0.00349476	0.00432855				8.345e-08	0.0704141	1.04752
4.1725e-08	0.0849132	8.345e-08	0.00339491	0.00443412				8.35e-08	0.779672	-0.775524
4.175e-08	0.0902537	8.35e-08	0.00379431	0.0032728				8.355e-08	0.798833	1.08719
4.1775e-08	0.0846462	8.355e-08	0.00379431	0.00443412				8.36e-08	-0.222002	0.602975
4.18e-08	0.0910547	8.36e-08	0.00319521	0.0041174				8.365e-08	1.35816	1.29538
4.1825e-08	0.0790387	8.365e-08	0.00409386	0.0045397				8.37e-08	1.03048	0.472797
4.185e-08	0.0846462	8.37e-08	0.00389416	0.00401182				8.375e-08	-0.691595	0.153992
4.1875e-08	0.0891856	8.375e-08	0.00289566	0.00380068				8.38e-08	0.894862	1.52481
4.19e-08	0.0870494	8.38e-08	0.00379431	0.00464527				8.385e-08	-0.308973	0.359689
4.1925e-08	0.0811749	8.385e-08	0.00309536	0.00390625				8.39e-08	-0.991703	0.208508
4.195e-08	0.0886515	8.39e-08	0.00269596	0.00380068				8.395e-08	0.426175	0.906065
4.1975e-08	0.0894526	8.395e-08	0.00349476	0.00422297				8.4e-08	-0.433078	0.585109
4.2e-08	0.0838451	8.4e-08	0.00299551	0.00401182				8.405e-08	-0.0646056	0.603893
4.2025e-08	0.0843792	8.405e-08	0.00319521	0.00401182				8.41e-08	2.06543	1.64646
4.205e-08	0.081976	8.41e-08	0.00439341	0.00464527				8.415e-08	0.499435	0.641611
4.2075e-08	0.0830441	8.415e-08	0.00349476	0.00401182				8.42e-08	-0.365118	0.147052
4.21e-08	0.0891856	8.42e-08	0.00299551	0.0036951				8.425e-08	-0.171306	1.7077
4.2125e-08	0.0769025	8.425e-08	0.00309536	0.00464527				8.43e-08	1.08576	0.0112752
4.215e-08	0.0918558	8.43e-08	0.00379431	0.00358953				8.435e-08	0.217667	0.200777
4.2175e-08	0.0851802	8.435e-08	0.00329506	0.0036951				8.44e-08	0.0575624	1.25171
4.22e-08	0.093992	8.44e-08	0.00319521	0.00432855				8.445e-08	0.0748825	0.581354
4.2225e-08	0.0817089	8.445e-08	0.00319521	0.00390625				8.45e-08	1.16158	0.945181
4.225e-08	0.0833111	8.45e-08	0.00379431	0.0041174				8.455e-08	-0.247357	-0.592519
4.2275e-08	0.0905207	8.455e-08	0.00299551	0.00316723				8.46e-08	0.127089	0.117075
4.23e-08	0.08251	8.46e-08	0.00319521	0.00358953				8.465e-08	-0.571617	-1.42659
4.2325e-08	0.0846462	8.465e-08	0.00279581	0.00263936				8.47e-08	1.23805	1.36892
4.235e-08	0.070761	8.47e-08	0.00379431	0.00432855				8.475e-08	-0.359304	-0.177758
4.2375e-08	0.08251	8.475e-08	0.00289566	0.00337838				8.48e-08	0.916334	-0.857848
4.24e-08	0.094259	8.48e-08	0.00359461	0.00295608				8.485e-08	0.214064	1.42718
4.2425e-08	0.082243	8.485e-08	0.00319521	0.00432855				8.49e-08	0.0508669	0.747301
4.245e-08	0.0843792	8.49e-08	0.00309536	0.00390625				8.495e-08	1.33276	-1.68536
4.2475e-08	0.0851802	8.495e-08	0.00379431	0.00242821				8.5e-08	0.0848477	2.362
4.25e-08	0.0931909	8.5e-08	0.00309536	0.00485642				8.505e-08	2.09572	-0.60239
4.2525e-08	0.0817089	8.505e-08	0.00419371	0.00306166				8.51e-08	-1.51482	-0.937784
4.255e-08	0.0790387	8.51e-08	0.0021967	0.00285051				8.515e-08	0.681585	1.01552
4.2575e-08	0.0801068	8.515e-08	0.00339491	0.00401182				8.52e-08	1.42795	-0.906114
4.26e-08	0.0934579	8.52e-08	0.00379431	0.00285051				8.525e-08	-0.923883	1.22963
4.2625e-08	0.0785047	8.525e-08	0.00249626	0.0041174				8.53e-08	-0.360631	1.60233
4.265e-08	0.0875834	8.53e-08	0.00279581	0.00432855				8.535e-08	0.935941	-0.327528
4.2675e-08	0.0865154	8.535e-08	0.00349476	0.00316723				8.54e-08	0.221106	0.0437857
4.27e-08	0.0806409	8.54e-08	0.00309536	0.00337838				8.545e-08	-0.128964	0.238457
4.2725e-08	0.0878505	8.545e-08	0.00289566	0.00348395				8.55e-08	0.62247	2.39164
4.275e-08	0.0889186	8.55e-08	0.00329506	0.00475084				8.555e-08	0.455964	-1.33137
4.2775e-08	0.0843792	8.555e-08	0.00319521	0.00253378				8.56e-08	1.76355	1.54006
4.28e-08	0.0835781	8.56e-08	0.00389416	0.00422297				8.565e-08	0.675233	-1.83792
4.2825e-08	0.0814419	8.565e-08	0.00329506	0.00221706				8.57e-08	-0.971152	1.04138
4.285e-08	0.0782377	8.57e-08	0.00239641	0.00390625				8.575e-08	0.895614	1.05974
4.2875e-08	0.0785047	8.575e-08	0.00339491	0.00390625				8.58e-08	1.0988	-0.358896
4.29e-08	0.0801068	8.58e-08	0.00349476	0.00306166				8.585e-08	-0.183397	1.27607
4.2925e-08	0.0913218	8.585e-08	0.00279581	0.00401182				8.59e-08	-0.539459	-1.22752
4.295e-08	0.0907877	8.59e-08	0.00259611	0.00253378				8.595e-08	1.89783	1.13261
4.2975e-08	0.0841121	8.595e-08	0.00389416	0.00390625				8.6e-08	-1.06832	0.970188
4.3e-08	0.0883845	8.6e-08	0.00229656	0.00380068				8.605e-08	-0.306229	-0.0975069
4.3025e-08	0.08251	8.605e-08	0.00269596	0.00316723				8.61e-08	-1.4133	0.643868
4.305e-08	0.0793057	8.61e-08	0.00209685	0.00358953				8.615e-08	0.662609	-0.0645466
4.3075e-08	0.0779706	8.615e-08	0.00319521	0.00316723				8.62e-08	-0.821851	0.133719
4.31e-08	0.0795728	8.62e-08	0.00239641	0.0032728				8.625e-08	-0.994925	0.332443
4.3125e-08	0.0851802	8.625e-08	0.00229656	0.00337838				8.63e-08	0.149355	-0.926939
4.315e-08	0.0811749	8.63e-08	0.00289566	0.00263936				8.635e-08	-0.588739	0.913857
4.3175e-08	0.0835781	8.635e-08	0.00249626	0.0036951				8.64e-08	-0.762552	1.48005
4.32e-08	0.0787717	8.64e-08	0.00239641	0.00401182				8.645e-08	2.46758	1.31536
4.3225e-08	0.082777	8.645e-08	0.00409386	0.00390625				8.65e-08	1.72953	-1.4175
4.325e-08	0.0843792	8.65e-08	0.00369446	0.00232264				8.655e-08	-2.04612	-0.484945
4.3275e-08	0.0865154	8.655e-08	0.00169745	0.00285051				8.66e-08	0.436714	-0.285423
4.33e-08	0.0897196	8.66e-08	0.00299551	0.00295608				8.665e-08	1.40479	0.283147
4.3325e-08	0.0806409	8.665e-08	0.00349476	0.0032728				8.67e-08	0.0888517	0.668859
4.335e-08	0.0814419	8.67e-08	0.00279581	0.00348395				8.675e-08	-0.0860173	0.50124
4.3375e-08	0.0763685	8.675e-08	0.00269596	0.00337838				8.68e-08	-0.261562	-0.777365
4.34e-08	0.082243	8.68e-08	0.00259611	0.00263936				8.685e-08	0.519445	1.09075
4.3425e-08	0.0720961	8.685e-08	0.00299551	0.0036951				8.69e-08	-0.422782	-0.562124
4.345e-08	0.0782377	8.69e-08	0.00249626	0.00274493				8.695e-08	0.168219	0.568255
4.3475e-08	0.0750334	8.695e-08	0.00279581	0.00337838				8.7e-08	2.49166	-1.27649
4.35e-08	0.070227	8.7e-08	0.00399401	0.00232264				8.705e-08	-1.91847	-0.33027
4.3525e-08	0.0801068	8.705e-08	0.00169745	0.00285051				8.71e-08	2.33759	-0.314777
4.355e-08	0.0777036	8.71e-08	0.00389416	0.00285051				8.715e-08	0.811428	-0.486237
4.3575e-08	0.0790387	8.715e-08	0.00309536	0.00274493				8.72e-08	1.02176	-0.845533
4.36e-08	0.0899866	8.72e-08	0.00319521	0.00253378				8.725e-08	-0.704928	-0.0807476
4.3625e-08	0.0769025	8.725e-08	0.00229656	0.00295608				8.73e-08	1.63794	-0.0651269
4.365e-08	0.0833111	8.73e-08	0.00349476	0.00295608				8.735e-08	0.489739	0.138545
4.3675e-08	0.0790387	8.735e-08	0.00289566	0.00306166				8.74e-08	0.311149	0.531142
4.37e-08	0.0763685	8.74e-08	0.00279581	0.0032728				8.745e-08	-0.452733	1.30218
4.3725e-08	0.0801068	8.745e-08	0.00239641	0.0036951				8.75e-08	0.537897	0.375086
4.375e-08	0.0790387	8.75e-08	0.00289566	0.00316723				8.755e-08	0.163032	0.958942
4.3775e-08	0.0835781	8.755e-08	0.00269596	0.00348395				8.76e-08	0.765969	0.218075
4.38e-08	0.0814419	8.76e-08	0.00299551	0.00306166				8.765e-08	-0.590093	-0.904558
4.3825e-08	0.0755674	8.765e-08	0.00229656	0.00242821				8.77e-08	-1.7539	0.0600473
4.385e-08	0.082243	8.77e-08	0.00169745	0.00295608				8.775e-08	-0.561274	-0.114646
4.3875e-08	0.0656876	8.775e-08	0.00229656	0.00285051				8.78e-08	0.831742	1.04434
4.39e-08	0.0777036	8.78e-08	0.00299551	0.00348395				8.785e-08	-2.1108	0.679443
4.3925e-08	0.0838451	8.785e-08	0.00149775	0.0032728				8.79e-08	0.271624	-0.260108
4.395e-08	0.0696929	8.79e-08	0.00269596	0.00274493				8.795e-08	0.089177	1.47798
4.3975e-08	0.0817089	8.795e-08	0.00259611	0.0036951				8.8e-08	-0.688223	-0.0384204
4.4e-08	0.0699599	8.8e-08	0.0021967	0.00285051				8.805e-08	0.913181	0.937001
4.4025e-08	0.0678238	8.805e-08	0.00299551	0.00337838				8.81e-08	1.52574	1.53069
4.405e-08	0.071028	8.81e-08	0.00329506	0.0036951				8.815e-08	1.54307	0.585395
4.4075e-08	0.0771696	8.815e-08	0.00329506	0.00316723				8.82e-08	2.55699	1.75888
4.41e-08	0.0766355	8.82e-08	0.00379431	0.00380068				8.825e-08	1.37804	0.617772
4.4125e-08	0.0715621	8.825e-08	0.00319521	0.00316723				8.83e-08	0.395344	0.827265
4.415e-08	0.071028	8.83e-08	0.00269596	0.0032728				8.835e-08	-0.390159	-0.706255
4.4175e-08	0.0809079	8.835e-08	0.00229656	0.00242821				8.84e-08	-1.17804	-0.692235
4.42e-08	0.0739653	8.84e-08	0.00189715	0.00242821				8.845e-08	0.240485	2.23617
4.4225e-08	0.0758344	8.845e-08	0.00259611	0.00401182				8.85e-08	0.65772	-0.858711
4.425e-08	0.0817089	8.85e-08	0.00279581	0.00232264				8.855e-08	0.270626	0.713992
4.4275e-08	0.0728972	8.855e-08	0.00259611	0.00316723				8.86e-08	-1.12606	1.31558
4.43e-08	0.0753004	8.86e-08	0.00189715	0.00348395				8.865e-08	1.51285	1.33262
4.4325e-08	0.0753004	8.865e-08	0.00319521	0.00348395				8.87e-08	0.113806	1.54537
4.435e-08	0.0851802	8.87e-08	0.00249626	0.00358953				8.875e-08	1.14155	0.190532
4.4375e-08	0.0742323	8.875e-08	0.00299551	0.00285051				8.88e-08	-0.0595723	1.18715
4.44e-08	0.0753004	8.88e-08	0.00239641	0.00337838				8.885e-08	-0.654773	-0.762154
4.4425e-08	0.0801068	8.885e-08	0.00209685	0.00232264				8.89e-08	-1.04829	0.432702
4.445e-08	0.0742323	8.89e-08	0.00189715	0.00295608				8.895e-08	1.20615	1.2367
4.4475e-08	0.071028	8.895e-08	0.00299551	0.00337838				8.9e-08	0.406001	-0.721131
4.45e-08	0.0720961	8.9e-08	0.00259611	0.00232264				8.905e-08	-1.00964	-0.90513
4.4525e-08	0.0809079	8.905e-08	0.00189715	0.00221706				8.91e-08	1.05011	0.494472
4.455e-08	0.08251	8.91e-08	0.00289566	0.00295608				8.915e-08	-1.3937	-0.283227
4.4575e-08	0.0766355	8.915e-08	0.00169745	0.00253378				8.92e-08	2.10855	0.525538
4.46e-08	0.0790387	8.92e-08	0.00339491	0.00295608				8.925e-08	-1.36903	0.739875
4.4625e-08	0.0688919	8.925e-08	0.00169745	0.00306166				8.93e-08	0.702101	-0.439549
4.465e-08	0.0742323	8.93e-08	0.00269596	0.00242821				8.935e-08	-0.313681	0.771115
4.4675e-08	0.0731642	8.935e-08	0.0021967	0.00306166				8.94e-08	0.525939	1.98523
4.47e-08	0.070227	8.94e-08	0.00259611	0.0036951				8.945e-08	1.98835	1.00236
4.4725e-08	0.0793057	8.945e-08	0.00329506	0.00316723				8.95e-08	0.141523	2.01997
4.475e-08	0.0747664	8.95e-08	0.00239641	0.0036951				8.955e-08	0.155855	-0.771338
4.4775e-08	0.0806409	8.955e-08	0.00239641	0.00221706				8.96e-08	0.585627	-0.155197
4.48e-08	0.0758344	8.96e-08	0.00259611	0.00253378				8.965e-08	0.600643	-2.55542
4.4825e-08	0.0809079	8.965e-08	0.00259611	0.00126689				8.97e-08	-0.4259	0.2764
4.485e-08	0.0793057	8.97e-08	0.00209685	0.00274493				8.975e-08	1.46509	1.09838
4.4875e-08	0.0715621	8.975e-08	0.00299551	0.00316723				8.98e-08	0.854392	-1.31079
4.49e-08	0.0712951	8.98e-08	0.00269596	0.00190034				8.985e-08	1.70639	-1.09607
4.4925e-08	0.0699599	8.985e-08	0.00309536	0.00200591				8.99e-08	1.09411	-0.0701038
4.495e-08	0.0688919	8.99e-08	0.00279581	0.00253378				8.995e-08	0.89968	0.552874
4.4975e-08	0.0672897	8.995e-08	0.00269596	0.00285051				9e-08	1.33508	-0.245138
4.5e-08	0.0656876	9e-08	0.00289566	0.00242821				9.005e-08	1.56131	1.19356
4.5025e-08	0.0779706	9.005e-08	0.00299551	0.00316723				9.01e-08	1.78819	0.190311
4.505e-08	0.0659546	9.01e-08	0.00309536	0.00263936				9.015e-08	1.1715	0.000694143
4.5075e-08	0.082777	9.015e-08	0.00279581	0.00253378				9.02e-08	1.82116	-0.393958
4.51e-08	0.0680908	9.02e-08	0.00309536	0.00232264				9.025e-08	-1.12584	1.46217
4.5125e-08	0.0744993	9.025e-08	0.00169745	0.0032728				9.03e-08	1.85389	1.06823
4.515e-08	0.0696929	9.03e-08	0.00309536	0.00306166				9.035e-08	0.384152	1.28903
4.5175e-08	0.0646195	9.035e-08	0.00239641	0.00316723				9.04e-08	-0.664697	-0.545708
4.52e-08	0.0798398	9.04e-08	0.00189715	0.00221706				9.045e-08	1.05105	-0.738474
4.5225e-08	0.0750334	9.045e-08	0.00269596	0.00211149				9.05e-08	-0.639511	0.0992012
4.525e-08	0.0694259	9.05e-08	0.00189715	0.00253378				9.055e-08	1.93526	0.939279
4.5275e-08	0.0694259	9.055e-08	0.00309536	0.00295608				9.06e-08	1.73782	-0.286182
4.53e-08	0.0720961	9.06e-08	0.00299551	0.00232264				9.065e-08	0.68327	-0.272626
4.5325e-08	0.0774366	9.065e-08	0.00249626	0.00232264				9.07e-08	0.268946	1.60747
4.535e-08	0.0731642	9.07e-08	0.00229656	0.0032728				9.075e-08	-0.36144	2.45439
4.5375e-08	0.0811749	9.075e-08	0.001997	0.0036951				9.08e-08	2.0171	-1.48014
4.54e-08	0.0659546	9.08e-08	0.00309536	0.00168919				9.085e-08	1.60255	1.23913
4.5425e-08	0.0731642	9.085e-08	0.00289566	0.00306166				9.09e-08	-0.538663	-0.831266
4.545e-08	0.0638184	9.09e-08	0.00189715	0.00200591				9.095e-08	0.769749	0.0167136
4.5475e-08	0.070761	9.095e-08	0.00249626	0.00242821				9.1e-08	0.567825	-1.22466
4.55e-08	0.0718291	9.1e-08	0.00239641	0.00179476				9.105e-08	-1.36754	0.253588
4.5525e-08	0.0750334	9.105e-08	0.00149775	0.00253378				9.11e-08	-0.488539	1.94585
4.555e-08	0.0728972	9.11e-08	0.00189715	0.00337838				9.115e-08	1.04469	0.0716446
4.5575e-08	0.0664887	9.115e-08	0.00259611	0.00242821				9.12e-08	0.189308	0.0854172
4.56e-08	0.070761	9.12e-08	0.0021967	0.00242821				9.125e-08	1.29209	0.731156
4.5625e-08	0.0769025	9.125e-08	0.00269596	0.00274493				9.13e-08	-0.438328	0.112731
4.565e-08	0.0769025	9.13e-08	0.00189715	0.00242821				9.135e-08	1.32193	0.337582
4.5675e-08	0.0678238	9.135e-08	0.00269596	0.00253378				9.14e-08	0.899224	0.351447
4.57e-08	0.071028	9.14e-08	0.00249626	0.00253378				9.145e-08	-0.620224	0.577208
4.5725e-08	0.0734312	9.145e-08	0.0017973	0.00263936				9.15e-08	-1.04694	0.803598
4.575e-08	0.0624833	9.15e-08	0.0015976	0.00274493				9.155e-08	-0.156513	-0.0317722
4.5775e-08	0.0758344	9.155e-08	0.001997	0.00232264				9.16e-08	-0.803842	2.10943
4.58e-08	0.0667557	9.16e-08	0.00169745	0.00337838				9.165e-08	0.309834	1.69971
4.5825e-08	0.070494	9.165e-08	0.0021967	0.00316723				9.17e-08	-0.118052	0.435187
4.585e-08	0.0742323	9.17e-08	0.001997	0.00253378				9.175e-08	-0.105282	1.0902
4.5875e-08	0.070227	9.175e-08	0.001997	0.00285051				9.18e-08	2.12044	-0.179029
4.59e-08	0.0691589	9.18e-08	0.00299551	0.00221706				9.185e-08	2.13621	1.97685
4.5925e-08	0.0654206	9.185e-08	0.00299551	0.0032728				9.19e-08	-0.733131	-0.367838
4.595e-08	0.0651535	9.19e-08	0.00169745	0.00211149				9.195e-08	1.94548	-0.570135
4.5975e-08	0.0664887	9.195e-08	0.00289566	0.00200591				9.2e-08	-0.264617	1.80945
4.6e-08	0.0675567	9.2e-08	0.00189715	0.00316723				9.205e-08	1.08499	0.101076
4.6025e-08	0.0635514	9.205e-08	0.00249626	0.00232264				9.21e-08	0.429718	-1.82797
4.605e-08	0.070494	9.21e-08	0.0021967	0.00137247				9.215e-08	-0.897954	0.559953
4.6075e-08	0.0648865	9.215e-08	0.0015976	0.00253378				9.22e-08	0.456482	1.43961
4.61e-08	0.0782377	9.22e-08	0.0021967	0.00295608				9.225e-08	-0.202634	0.804486
4.6125e-08	0.0672897	9.225e-08	0.00189715	0.00263936				9.23e-08	0.258574	-1.35183
4.615e-08	0.0648865	9.23e-08	0.00209685	0.00158361				9.235e-08	0.0466627	0.615263
4.6175e-08	0.070494	9.235e-08	0.001997	0.00253378				9.24e-08	-1.06626	-0.676898
4.62e-08	0.0622163	9.24e-08	0.00149775	0.00190034				9.245e-08	1.42419	0.642739
4.6225e-08	0.0678238	9.245e-08	0.00259611	0.00253378				9.25e-08	0.0843122	-0.653041
4.625e-08	0.0646195	9.25e-08	0.001997	0.00190034				9.255e-08	-0.355176	-0.203942
4.6275e-08	0.070494	9.255e-08	0.0017973	0.00211149				9.26e-08	3.05225	0.903043
4.63e-08	0.0686248	9.26e-08	0.00329506	0.00263936				9.265e-08	1.93566	-1.27461
4.6325e-08	0.070494	9.265e-08	0.00279581	0.00158361				9.27e-08	1.95089	2.02887
4.635e-08	0.0656876	9.27e-08	0.00279581	0.00316723				9.275e-08	-1.44381	-0.373305
4.6375e-08	0.0672897	9.275e-08	0.00129805	0.00200591				9.28e-08	-0.295308	0.959525
4.64e-08	0.0670227	9.28e-08	0.0017973	0.00263936				9.285e-08	0.400402	-0.348993
4.6425e-08	0.0651535	9.285e-08	0.00209685	0.00200591				9.29e-08	-0.728213	0.10458
4.645e-08	0.0630174	9.29e-08	0.0015976	0.00221706				9.295e-08	-1.40281	-0.54575
4.6475e-08	0.070494	9.295e-08	0.00129805	0.00190034				9.3e-08	-0.476902	-0.755231
4.65e-08	0.0683578	9.3e-08	0.00169745	0.00179476				9.305e-08	-1.15305	-0.300361
4.6525e-08	0.0699599	9.305e-08	0.0013979	0.00200591				9.31e-08	-0.453769	0.599696
4.655e-08	0.0646195	9.31e-08	0.00169745	0.00242821				9.315e-08	2.08651	0.168652
4.6575e-08	0.0696929	9.315e-08	0.00279581	0.00221706				9.32e-08	-0.660759	0.404099
4.66e-08	0.0763685	9.32e-08	0.0015976	0.00232264				9.325e-08	-0.419007	-1.58884
4.6625e-08	0.0640854	9.325e-08	0.00169745	0.00137247				9.33e-08	-0.176689	0.653432
4.665e-08	0.0662216	9.33e-08	0.0017973	0.00242821				9.335e-08	-0.85844	0.219702
4.6675e-08	0.0672897	9.335e-08	0.00149775	0.00221706				9.34e-08	3.78203	0.903833
4.67e-08	0.0643525	9.34e-08	0.00349476	0.00253378				9.345e-08	0.322133	-1.54799
4.6725e-08	0.0672897	9.345e-08	0.001997	0.00137247				9.35e-08	-0.826098	-1.31332
4.675e-08	0.0680908	9.35e-08	0.00149775	0.00147804				9.355e-08	0.811864	0.495258
4.6775e-08	0.0720961	9.355e-08	0.0021967	0.00232264				9.36e-08	1.52329	0.958476
4.68e-08	0.0675567	9.36e-08	0.00249626	0.00253378				9.365e-08	0.371918	0.521455
4.6825e-08	0.0659546	9.365e-08	0.001997	0.00232264				9.37e-08	0.851258	-1.04531
4.685e-08	0.0686248	9.37e-08	0.0021967	0.00158361				9.375e-08	-0.771896	-1.03447
4.6875e-08	0.070761	9.375e-08	0.00149775	0.00158361				9.38e-08	1.34548	0.334229
4.69e-08	0.0640854	9.38e-08	0.00239641	0.00221706				9.385e-08	0.421496	-0.559697
4.6925e-08	0.0627503	9.385e-08	0.001997	0.00179476				9.39e-08	0.903211	2.40192
4.695e-08	0.0675567	9.39e-08	0.0021967	0.00316723				9.395e-08	0.446079	0.144784
4.6975e-08	0.0691589	9.395e-08	0.001997	0.00211149				9.4e-08	0.223038	-2.11858
4.7e-08	0.0616822	9.4e-08	0.00189715	0.00105574				9.405e-08	0.470746	-0.0584244
4.7025e-08	0.0624833	9.405e-08	0.001997	0.00200591				9.41e-08	1.19116	2.92023
4.705e-08	0.0632844	9.41e-08	0.00229656	0.00337838				9.415e-08	-1.39517	-0.719813
4.7075e-08	0.0608812	9.415e-08	0.0011982	0.00168919				9.42e-08	-0.675386	-0.0221825
4.71e-08	0.0523364	9.42e-08	0.00149775	0.00200591				9.425e-08	-0.427677	0.906428
4.7125e-08	0.0627503	9.425e-08	0.0015976	0.00242821				9.43e-08	-2.78988	0.00177687
4.715e-08	0.0648865	9.43e-08	0.000599101	0.00200591				9.435e-08	1.02006	0.473233
4.7175e-08	0.0630174	9.435e-08	0.0021967	0.00221706				9.44e-08	0.556985	-2.04523
4.72e-08	0.0667557	9.44e-08	0.001997	0.00105574				9.445e-08	0.0926209	1.88072
4.7225e-08	0.0622163	9.445e-08	0.0017973	0.00285051				9.45e-08	1.29728	-1.3349
4.725e-08	0.0643525	9.45e-08	0.00229656	0.00137247				9.455e-08	-1.31783	1.90968
4.7275e-08	0.0619493	9.455e-08	0.0011982	0.00285051				9.46e-08	-1.30816	2.38692
4.73e-08	0.0630174	9.46e-08	0.0011982	0.00306166				9.465e-08	0.139125	0.780407
4.7325e-08	0.0635514	9.465e-08	0.0017973	0.00232264				9.47e-08	1.59036	0.561378
4.735e-08	0.0600801	9.47e-08	0.00239641	0.00221706				9.475e-08	1.12343	-0.35529
4.7375e-08	0.0616822	9.475e-08	0.0021967	0.00179476				9.48e-08	1.61744	-1.04194
4.74e-08	0.0566088	9.48e-08	0.00239641	0.00147804				9.485e-08	-1.74185	1.53068
4.7425e-08	0.0715621	9.485e-08	0.000998502	0.00263936				9.49e-08	-0.0443417	-0.321672
4.745e-08	0.0678238	9.49e-08	0.00169745	0.00179476				9.495e-08	-0.0331884	0.623833
4.7475e-08	0.0718291	9.495e-08	0.00169745	0.00221706				9.5e-08	-1.23146	-1.23482
4.75e-08	0.0648865	9.5e-08	0.0011982	0.00137247				9.505e-08	0.715834	-0.522216
4.7525e-08	0.0654206	9.505e-08	0.001997	0.00168919				9.51e-08	-0.969785	1.13047
4.755e-08	0.0761015	9.51e-08	0.00129805	0.00242821				9.515e-08	1.7118	1.6134
4.7575e-08	0.0635514	9.515e-08	0.00239641	0.00263936				9.52e-08	-1.19315	0.686555
4.76e-08	0.0678238	9.52e-08	0.0011982	0.00221706				9.525e-08	1.00826	1.64104
4.7625e-08	0.0643525	9.525e-08	0.00209685	0.00263936				9.53e-08	0.776823	-0.231772
4.765e-08	0.0619493	9.53e-08	0.001997	0.00179476				9.535e-08	-0.920499	-1.63745
4.7675e-08	0.0627503	9.535e-08	0.00129805	0.00116132				9.54e-08	1.77902	0.972708
4.77e-08	0.0600801	9.54e-08	0.00239641	0.00232264				9.545e-08	-0.900998	0.275115
4.7725e-08	0.0678238	9.545e-08	0.00129805	0.00200591				9.55e-08	0.0894986	-0.424374
4.775e-08	0.059279	9.55e-08	0.00169745	0.00168919				9.555e-08	-2.10901	-0.888351
4.7775e-08	0.0691589	9.555e-08	0.000798802	0.00147804				9.56e-08	0.111744	-0.878125
4.78e-08	0.059012	9.56e-08	0.00169745	0.00147804				9.565e-08	1.10761	1.03657
4.7825e-08	0.0624833	9.565e-08	0.00209685	0.00232264				9.57e-08	0.134066	0.811018
4.785e-08	0.0611482	9.57e-08	0.00169745	0.00221706				9.575e-08	0.145172	-0.131361
4.7875e-08	0.0622163	9.575e-08	0.00169745	0.00179476				9.58e-08	0.897725	0.596784
4.79e-08	0.0656876	9.58e-08	0.001997	0.00211149				9.585e-08	-0.0803122	-0.827281
4.7925e-08	0.0598131	9.585e-08	0.0015976	0.00147804				9.59e-08	2.16082	1.33976
4.795e-08	0.0630174	9.59e-08	0.00249626	0.00242821				9.595e-08	1.67812	1.35273
4.7975e-08	0.0566088	9.595e-08	0.00229656	0.00242821				9.6e-08	1.19411	-0.55673
4.8e-08	0.0574099	9.6e-08	0.00209685	0.00158361				9.605e-08	0.459988	0.175602
4.8025e-08	0.0595461	9.605e-08	0.0017973	0.00190034				9.61e-08	-0.0269483	-0.294871
4.805e-08	0.0544726	9.61e-08	0.0015976	0.00168919				9.615e-08	0.233284	0.681061
4.8075e-08	0.0600801	9.615e-08	0.00169745	0.00211149				9.62e-08	0.244358	0.209952
4.81e-08	0.071028	9.62e-08	0.00169745	0.00190034				9.625e-08	1.00587	0.947133
4.8125e-08	0.0627503	9.625e-08	0.001997	0.00221706				9.63e-08	-0.485163	0.474912
4.815e-08	0.0595461	9.63e-08	0.0013979	0.00200591				9.635e-08	-0.475257	1.21424
4.8175e-08	0.0576769	9.635e-08	0.0013979	0.00232264				9.64e-08	-1.46999	0.498111
4.82e-08	0.0624833	9.64e-08	0.000998502	0.00200591				9.645e-08	0.801978	0.509721
4.8225e-08	0.0608812	9.645e-08	0.00189715	0.00200591				9.65e-08	1.56902	-0.209284
4.825e-08	0.0694259	9.65e-08	0.0021967	0.00168919				9.655e-08	1.58163	-0.686343
4.8275e-08	0.0622163	9.655e-08	0.0021967	0.00147804				9.66e-08	-0.425665	0.788895
4.83e-08	0.0598131	9.66e-08	0.0013979	0.00211149				9.665e-08	-1.17417	-0.177166
4.8325e-08	0.0493992	9.665e-08	0.00109835	0.00168919				9.67e-08	1.11327	1.05782
4.835e-08	0.0528705	9.67e-08	0.001997	0.00221706				9.675e-08	2.39271	-0.400967
4.8375e-08	0.0547397	9.675e-08	0.00249626	0.00158361				9.68e-08	1.64474	-0.145196
4.84e-08	0.0566088	9.68e-08	0.0021967	0.00168919				9.685e-08	0.64055	-0.626295
4.8425e-08	0.0683578	9.685e-08	0.0017973	0.00147804				9.69e-08	0.397184	-0.370242
4.845e-08	0.0638184	9.69e-08	0.00169745	0.00158361				9.695e-08	0.40799	-0.360007
4.8475e-08	0.0619493	9.695e-08	0.00169745	0.00158361				9.7e-08	0.673981	-1.58377
4.85e-08	0.0651535	9.7e-08	0.0017973	0.00105574				9.705e-08	0.940667	-1.328
4.8525e-08	0.0595461	9.705e-08	0.00189715	0.00116132				9.71e-08	-1.09449	-0.8241
4.855e-08	0.0632844	9.71e-08	0.00109835	0.00137247				9.715e-08	-0.317092	-0.814442
4.8575e-08	0.0547397	9.715e-08	0.0013979	0.00137247				9.72e-08	-1.58978	-0.804792
4.86e-08	0.059012	9.72e-08	0.000898652	0.00137247				9.725e-08	-0.297375	1.19238
4.8625e-08	0.0622163	9.725e-08	0.0013979	0.00221706				9.73e-08	-0.287608	-0.0393457
4.865e-08	0.0619493	9.73e-08	0.0013979	0.00168919				9.735e-08	-0.792925	0.220231
4.8675e-08	0.0675567	9.735e-08	0.0011982	0.00179476				9.74e-08	0.247538	0.480452
4.87e-08	0.0614152	9.74e-08	0.0015976	0.00190034				9.745e-08	2.83982	0.741339
4.8725e-08	0.0627503	9.745e-08	0.00259611	0.00200591				9.75e-08	0.268326	-0.2475
4.875e-08	0.0555407	9.75e-08	0.0015976	0.00158361				9.755e-08	-1.53329	0.0131023
4.8775e-08	0.058745	9.755e-08	0.000898652	0.00168919				9.76e-08	-0.747603	0.0236489
4.88e-08	0.0539386	9.76e-08	0.0011982	0.00168919				9.765e-08	1.07829	-0.216856
4.8825e-08	0.0656876	9.765e-08	0.00189715	0.00158361				9.77e-08	0.0502647	0.54758
4.885e-08	0.0651535	9.77e-08	0.00149775	0.00190034				9.775e-08	0.0603456	0.307006
4.8875e-08	0.0683578	9.775e-08	0.00149775	0.00179476				9.78e-08	-0.450751	0.317767
4.89e-08	0.0598131	9.78e-08	0.00129805	0.00179476				9.785e-08	-1.22412	-0.428676
4.8925e-08	0.0520694	9.785e-08	0.000998502	0.00147804				9.79e-08	0.0902849	-0.166224
4.895e-08	0.0582109	9.79e-08	0.00149775	0.00158361				9.795e-08	-0.161315	2.37431
4.8975e-08	0.0624833	9.795e-08	0.0013979	0.00263936				9.8e-08	-1.72307	-0.399437
4.9e-08	0.0606142	9.8e-08	0.000798802	0.00147804				9.805e-08	0.644698	-0.897071
4.9025e-08	0.0686248	9.805e-08	0.00169745	0.00126689				9.81e-08	0.655399	-1.14197
4.905e-08	0.0579439	9.81e-08	0.00169745	0.00116132				9.815e-08	1.71779	1.41057
4.9075e-08	0.0582109	9.815e-08	0.00209685	0.00221706				9.82e-08	0.413589	0.913306
4.91e-08	0.0656876	9.82e-08	0.0015976	0.00200591				9.825e-08	-0.366875	0.924721
4.9125e-08	0.0560748	9.825e-08	0.00129805	0.00200591				9.83e-08	-0.621563	1.19143
4.915e-08	0.0579439	9.83e-08	0.0011982	0.00211149				9.835e-08	0.180127	-0.331114
4.9175e-08	0.058478	9.835e-08	0.00149775	0.00147804				9.84e-08	-0.339225	-0.833515
4.92e-08	0.0515354	9.84e-08	0.00129805	0.00126689				9.845e-08	1.25966	1.99542
4.9225e-08	0.0595461	9.845e-08	0.00189715	0.00242821				9.85e-08	-2.17781	0.211256
4.925e-08	0.0638184	9.85e-08	0.000599101	0.00168919				9.855e-08	-0.577208	1.2497
4.9275e-08	0.0520694	9.855e-08	0.0011982	0.00211149				9.86e-08	-1.10023	-0.54006
4.93e-08	0.0550067	9.86e-08	0.000998502	0.00137247				9.865e-08	-0.293063	0.242413
4.9325e-08	0.0574099	9.865e-08	0.00129805	0.00168919				9.87e-08	0.516154	0.768862
4.935e-08	0.0542056	9.87e-08	0.0015976	0.00190034				9.875e-08	2.39533	-1.287
4.9375e-08	0.0560748	9.875e-08	0.00229656	0.00105574				9.88e-08	1.07123	1.56688
4.94e-08	0.0542056	9.88e-08	0.0017973	0.00221706				9.885e-08	0.0113666	0.0246449
4.9425e-08	0.0651535	9.885e-08	0.0013979	0.00158361				9.89e-08	0.0208079	0.553253
4.945e-08	0.0627503	9.89e-08	0.0013979	0.00179476				9.895e-08	-1.04312	0.304144
4.9475e-08	0.059279	9.895e-08	0.000998502	0.00168919				9.9e-08	-0.228969	0.0543871
4.95e-08	0.0555407	9.9e-08	0.00129805	0.00158361				9.905e-08	1.12529	1.10575
4.9525e-08	0.058478	9.905e-08	0.0017973	0.00200591				9.91e-08	3.02172	1.89912
4.955e-08	0.0595461	9.91e-08	0.00249626	0.00232264				9.915e-08	-0.74091	0.345325
4.9575e-08	0.0515354	9.915e-08	0.00109835	0.00168919				9.92e-08	0.0777356	1.40109
4.96e-08	0.0656876	9.92e-08	0.0013979	0.00211149				9.925e-08	0.627994	-0.680879
4.9625e-08	0.0510013	9.925e-08	0.0015976	0.00126689				9.93e-08	1.17955	-0.409987
4.965e-08	0.0531375	9.93e-08	0.0017973	0.00137247				9.935e-08	0.377051	-0.138461
4.9675e-08	0.0566088	9.935e-08	0.00149775	0.00147804				9.94e-08	0.11533	0.921807
4.97e-08	0.0552737	9.94e-08	0.0013979	0.00190034				9.945e-08	0.93994	-0.908559
4.9725e-08	0.0555407	9.945e-08	0.00169745	0.00116132				9.95e-08	1.22242	0.153403
4.975e-08	0.0630174	9.95e-08	0.0017973	0.00158361				9.955e-08	0.143447	-0.627824
4.9775e-08	0.0563418	9.955e-08	0.0013979	0.00126689				9.96e-08	0.69841	2.02141
4.98e-08	0.0528705	9.96e-08	0.0015976	0.00232264				9.965e-08	-0.930193	0.711821
4.9825e-08	0.0616822	9.965e-08	0.000998502	0.00179476				9.97e-08	0.44518	0.192976
4.985e-08	0.0568758	9.97e-08	0.00149775	0.00158361				9.975e-08	1.27633	-1.38747
4.9875e-08	0.0579439	9.975e-08	0.0017973	0.000950169				9.98e-08	-0.0837355	-0.583545
4.99e-08	0.0614152	9.98e-08	0.00129805	0.00126689				9.985e-08	-0.623776	1.55094
[truncated: 6,491 more rows]

## Sheet: Figure 3 - C
resting		active
average dist, r, resting	standarad deviation, sig, resting	average dist, r, active	standard deviation, sig, active
54.1422	2.99357	58.035	4.93738
53.8966	2.6295	58.4739	5.26169
54.0722	3.07478	57.0726	4.78998
54.0758	2.38875	57.2516	4.85063

## Sheet: Figure 3 - D
	Probability Density					chiLife Distance distributions
Distance (Å)	resting	active	Normalized Förster equation			Distance (Å)	Apo_AA	Apo_AB	Apo_AC	Apo_AD	cAMP_AA	cAMP_AB	cAMP_AC	cAMP_AD
0.1	1.51078e-31	1.00829e-72	0.229064			0	0	0	0	0	0	0	0	0
0.2	1.91305e-31	1.84741e-72	0.229064			0.392157	0	0	0	0	0	0	0	0
0.3	2.42144e-31	3.38106e-72	0.229064			0.784314	0	0	0	0	0	0	0	0
0.4	3.06368e-31	6.18097e-72	0.229064			1.17647	0	0	0	0	0	0	0	0
0.5	3.87468e-31	1.12868e-71	0.229064			1.56863	0	0	0	0	0	0	0	0
0.6	4.89838e-31	2.05874e-71	0.229064			1.96078	0	0	0	0	0	0	0	0
0.7	6.19e-31	3.75096e-71	0.229064			2.35294	0	0	0	0	0	0	0	0
0.8	7.81902e-31	6.82649e-71	0.229064			2.7451	0	0	0	0	0	0	0	0
0.9	9.87272e-31	1.24098e-70	0.229064			3.13725	0	0	0	0	0	0	0	0
1	1.24608e-30	2.25344e-70	0.229064			3.52941	0	0	0	0	0	0	0	0
1.1	1.57208e-30	4.08732e-70	0.229064			3.92157	0	0	0	0	0	0	0	0
1.2	1.98257e-30	7.40535e-70	0.229064			4.31373	0	0	0	0	0	0	0	0
1.3	2.49922e-30	1.34018e-69	0.229064			4.70588	0	0	0	0	0	0	0	0
1.4	3.14922e-30	2.42268e-69	0.229064			5.09804	0	0	0	0	0	0	0	0
1.5	3.96666e-30	4.37463e-69	0.229064			5.4902	0	0	0	0	0	0	0	0
1.6	4.99425e-30	7.89041e-69	0.229064			5.88235	0	0	0	0	0	0	0	0
1.7	6.28547e-30	1.42158e-68	0.229064			6.27451	0	0	0	0	0	0	0	0
1.8	7.9073e-30	2.55832e-68	0.229064			6.66667	0	0	0	0	0	0	0	0
1.9	9.94356e-30	4.59887e-68	0.229064			7.05882	0	0	0	0	0	0	0	0
2	1.24991e-29	8.25773e-68	0.229064			7.45098	0	0	0	0	0	0	0	0
2.1	1.5705e-29	1.4811e-67	0.229064			7.84314	0	0	0	0	0	0	0	0
2.2	1.97251e-29	2.6535e-67	0.229064			8.23529	0	0	0	0	0	0	0	0
2.3	2.47642e-29	4.74862e-67	0.229064			8.62745	0	0	0	0	0	0	0	0
2.4	3.1078e-29	8.48845e-67	0.229064			9.01961	0	0	0	0	0	0	0	0
2.5	3.89855e-29	1.51566e-66	0.229064			9.41176	0	0	0	0	0	0	0	0
2.6	4.88852e-29	2.70327e-66	0.229064			9.80392	0	0	0	0	0	0	0	0
2.7	6.12737e-29	4.81604e-66	0.229064			10.1961	0	0	0	0	0	0	0	0
2.8	7.67704e-29	8.57043e-66	0.229064			10.5882	0	0	0	0	0	0	0	0
2.9	9.61471e-29	1.52345e-65	0.229064			10.9804	0	0	0	0	0	0	0	0
3	1.20365e-28	2.705e-65	0.229064			11.3725	0	0	0	0	0	0	0	0
3.1	1.50623e-28	4.79755e-65	0.229064			11.7647	0	0	0	0	0	0	0	0
3.2	1.88409e-28	8.49931e-65	0.229064			12.1569	0	0	0	0	0	0	0	0
3.3	2.35578e-28	1.50405e-64	0.229064			12.549	0	0	0	0	0	0	0	0
3.4	2.94437e-28	2.65859e-64	0.229064			12.9412	0	0	0	0	0	0	0	0
3.5	3.67851e-28	4.69413e-64	0.229064			13.3333	0	0	0	0	0	0	0	0
3.6	4.59383e-28	8.27888e-64	0.229064			13.7255	0	0	0	0	0	0	0	0
3.7	5.73457e-28	1.45848e-63	0.229064			14.1176	0	0	0	0	0	0	0	0
3.8	7.15565e-28	2.56651e-63	0.229064			14.5098	0	0	0	0	0	0	0	0
3.9	8.92526e-28	4.51126e-63	0.229064			14.902	0	0	0	0	0	0	0	0
4	1.11279e-27	7.92074e-63	0.229064			15.2941	0	0	0	0	0	0	0	0
4.1	1.38686e-27	1.38914e-62	0.229064			15.6863	0	0	0	0	0	0	0	0
4.2	1.72772e-27	2.43355e-62	0.229064			16.0784	0	0	0	0	0	0	0	0
4.3	2.15147e-27	4.2584e-62	0.229064			16.4706	0	0	0	0	0	0	0	0
4.4	2.67807e-27	7.44332e-62	0.229064			16.8627	0	0	0	0	0	0	0	0
4.5	3.33219e-27	1.29957e-61	0.229064			17.2549	0	0	0	0	1.0223e-10	0	0	0
4.6	4.1444e-27	2.26644e-61	0.229063			17.6471	0	0	0	0	5.13352e-09	0	0	0
4.7	5.15249e-27	3.94823e-61	0.229063			18.0392	0	0	0	0	5.2507e-08	0	0	0
4.8	6.40316e-27	6.87027e-61	0.229063			18.4314	0	0	0	0	3.12305e-07	0	0	0
4.9	7.95417e-27	1.19415e-60	0.229063			18.8235	0	0	0	0	1.32035e-06	0	0	0
5	9.87684e-27	2.07327e-60	0.229063			19.2157	0	0	0	0	4.70221e-06	0	0	0
5.1	1.22593e-26	3.59555e-60	0.229063			19.6078	0	0	0	0	1.45057e-05	0	0	0
5.2	1.52102e-26	6.22857e-60	0.229063			20	0	0	0	0	3.96399e-05	0	0	0
5.3	1.88636e-26	1.07776e-59	0.229063			20.3922	0	0	0	0	9.74146e-05	0	0	0
5.4	2.33852e-26	1.86283e-59	0.229063			20.7843	0	0	0	0	0.000217732	0	0	0
5.5	2.89787e-26	3.21614e-59	0.229063			21.1765	0	0	0	0	0.00044726	0	0	0
5.6	3.58954e-26	5.54637e-59	0.229063			21.5686	0	0	0	0	0.000850129	0	0	0
5.7	4.4445e-26	9.55425e-59	0.229063			21.9608	0	0	0	0	0.00150552	0	0	0
5.8	5.50084e-26	1.64398e-58	0.229063			22.3529	0	0	0	0	0.00250344	0	0	0
5.9	6.80548e-26	2.8256e-58	0.229062			22.7451	0	0	0	0	0.00394765	0	0	0
6	8.41611e-26	4.85106e-58	0.229062			23.1373	8.50957e-11	0	0	0	0.00596087	0	0	0
6.1	1.04037e-25	8.31909e-58	0.229062			23.5294	1.69679e-09	0	0	0	0.00868327	0	0	0
6.2	1.28554e-25	1.42504e-57	0.229062			23.9216	1.68733e-08	0	0	0	0.0122465	0	0	0
6.3	1.58784e-25	2.43833e-57	0.229062			24.3137	1.17167e-07	0	0	0	0.0167061	0	0	0
6.4	1.96042e-25	4.16745e-57	0.229062			24.7059	5.84202e-07	0	0	0	0.0219754	0	0	0
6.5	2.41945e-25	7.11478e-57	0.229061			25.098	2.03919e-06	0	0	0	0.0278191	0	0	0
6.6	2.98474e-25	1.21329e-56	0.229061			25.4902	6.04152e-06	0	0	0	0.0339698	0	0	0
6.7	3.6806e-25	2.06672e-56	0.229061			25.8824	1.57045e-05	0	0	0	0.0403408	0	0	0
6.8	4.53685e-25	3.5165e-56	0.229061			26.2745	3.62942e-05	0	0	0	0.0472473	0	0	0
6.9	5.59001e-25	5.97659e-56	0.22906			26.6667	7.52892e-05	0	0	0	0.0554959	0	0	0
7	6.88484e-25	1.01463e-55	0.22906			27.0588	0.000141475	0	0	0	0.0662863	0	0	0
7.1	8.47614e-25	1.72059e-55	0.22906			27.451	0.000244098	0	0	0	0.0809135	0	0	0
7.2	1.0431e-24	2.91446e-55	0.229059			27.8431	0.000393313	0	0	0	0.10035	0	0	0
7.3	1.28314e-24	4.9312e-55	0.229059			28.2353	0.000603325	0	0	0	0.124747	0	0	0
7.4	1.57779e-24	8.33412e-55	0.229059			28.6275	0.000896422	0	0	0	0.152942	0	0	0
7.5	1.9393e-24	1.40695e-54	0.229058			29.0196	0.00130194	0	0	0	0.182111	0	0	0
7.6	2.38266e-24	2.37253e-54	0.229058			29.4118	0.0018519	0	0	0	0.207856	0	0	0
7.7	2.9262e-24	3.9963e-54	0.229057			29.8039	0.00257288	0	0	0	0.224999	0	0	0
7.8	3.59227e-24	6.72384e-54	0.229057			30.1961	0.00348457	0	0	0	0.229064	0	0	0
7.9	4.40815e-24	1.13003e-53	0.229056			30.5882	0.00460588	0	0	0	0.217941	0	0	0
8	5.40713e-24	1.89703e-53	0.229056			30.9804	0.00596907	0	0	0	0.192911	0	0	0
8.1	6.62979e-24	3.18105e-53	0.229055			31.3725	0.00763235	0	0	0	0.158383	0	0	0
8.2	8.12561e-24	5.32821e-53	0.229054			31.7647	0.00968517	0	0	0	0.120412	0	0	0
8.3	9.95485e-24	8.91465e-53	0.229053			32.1569	0.0122415	0	0	0	0.0847298	0	0	0
8.4	1.21909e-23	1.48984e-52	0.229053			32.549	0.0154115	0	0	0	0.0552162	0	0	0
8.5	1.49232e-23	2.48708e-52	0.229052			32.9412	0.0192501	0	0	0	0.0333809	0	0	0
8.6	1.82604e-23	4.14717e-52	0.229051			33.3333	0.023699	0	0	0	0.0187776	0	0	0
8.7	2.23347e-23	6.90759e-52	0.22905			33.7255	0.0285777	0	0	0	0.00987456	0	0	0
8.8	2.7307e-23	1.14925e-51	0.229049			34.1176	0.0336558	0	0	0	0.00488882	0	0	0
8.9	3.33726e-23	1.90992e-51	0.229048			34.5098	0.0387797	0	0	0	0.00230074	0	0	0
9	4.07689e-23	3.17051e-51	0.229047			34.902	0.0439538	0	0	0	0.00104241	0	0	0
9.1	4.97842e-23	5.25721e-51	0.229046			35.2941	0.0493062	0	0	0	0.000459961	0	0	0
9.2	6.07682e-23	8.70753e-51	0.229045			35.6863	0.0549622	0	0	0	0.000199183	0	0	0
9.3	7.41454e-23	1.44061e-50	0.229043			36.0784	0.0609336	0	0	0	8.41233e-05	0	0	0
9.4	9.04306e-23	2.38074e-50	0.229042			36.4706	0.0671203	0	0	0	3.41031e-05	0	0	0
9.5	1.10248e-22	3.92999e-50	0.22904			36.8627	0.0734171	0	0	0	1.3078e-05	0	0	0
9.6	1.34352e-22	6.48011e-50	0.229039			37.2549	0.0798275	0	0	0	4.60328e-06	0	0	0
9.7	1.63661e-22	1.0673e-49	0.229037			37.6471	0.0864979	0	2.89706e-10	0	1.44276e-06	0	0	0
9.8	1.99282e-22	1.75591e-49	0.229036			38.0392	0.0936617	0	2.47335e-09	0	3.82864e-07	0	0	0
9.9	2.42557e-22	2.88558e-49	0.229034			38.4314	0.101548	0	1.28868e-08	0	7.89856e-08	0	0	0
10	2.95108e-22	4.7367e-49	0.229032			38.8235	0.110284	0	5.29302e-08	0	9.77038e-09	0	0	0
10.1	3.58899e-22	7.76662e-49	0.22903			39.2157	0.119846	0	1.7893e-07	0	3.0319e-10	0	0	0
10.2	4.36301e-22	1.27204e-48	0.229028			39.6078	0.129979	0	5.34537e-07	0	0	0	0	0
10.3	5.3018e-22	2.08105e-48	0.229026			40	0.14007	0	1.42295e-06	0	0	0	0	0
10.4	6.43996e-22	3.40077e-48	0.229023			40.3922	0.148959	0	3.42328e-06	0	0	0	0	0
10.5	7.81927e-22	5.55116e-48	0.229021			40.7843	0.15485	0	7.53321e-06	0	0	0	0	0
10.6	9.49012e-22	9.05116e-48	0.229018			41.1765	0.155566	0	1.54448e-05	0	0	0	0	0
10.7	1.15133e-21	1.47414e-47	0.229016			41.5686	0.149223	0	3.0076e-05	0	0	0	0	0
10.8	1.39621e-21	2.39819e-47	0.229013			41.9608	0.135135	0	5.69493e-05	0	0	0	0	0
10.9	1.69249e-21	3.89711e-47	0.22901			42.3529	0.114426	0	0.000107099	0	0	0	0	0
11	2.0508e-21	6.32579e-47	0.229007			42.7451	0.0899267	1.0053e-10	0.000204954	0	0	0	0	0
11.1	2.48395e-21	1.02565e-46	0.229004			43.1373	0.0652804	4.05286e-09	0.000399741	0	0	0	0	0
11.2	3.00737e-21	1.66111e-46	0.229001			43.5294	0.0437168	3.04519e-08	0.000780675	0	0	0	0	0
11.3	3.63959e-21	2.68725e-46	0.228997			43.9216	0.0271164	2.22343e-07	0.00149008	0	0	0	0	0
11.4	4.40293e-21	4.34242e-46	0.228993			44.3137	0.0157844	1.10099e-06	0.00272299	0	0	0	0	0
11.5	5.32419e-21	7.0092e-46	0.22899			44.7059	0.00887822	3.96498e-06	0.00469371	0	0	0	0	0
11.6	6.43558e-21	1.1301e-45	0.228986			45.098	0.00509036	1.21474e-05	0.00756637	0	0	0	0	0
11.7	7.7758e-21	1.82004e-45	0.228981			45.4902	0.00319709	3.27607e-05	0.011365	0	0	0	0	0
11.8	9.3913e-21	2.9279e-45	0.228977			45.8824	0.00230667	7.88233e-05	0.015903	0	0	0	0	0
11.9	1.13378e-20	4.70483e-45	0.228973			46.2745	0.00187552	0.000170995	0.0207899	0	0	0	0	0
12	1.36822e-20	7.5517e-45	0.228968			46.6667	0.00160802	0.000337961	0.0255436	0	0	1.47814e-10	1.85212e-09	0
12.1	1.65046e-20	1.21076e-44	0.228963			47.0588	0.00136498	0.000615053	0.029763	0	0	7.73015e-09	1.82832e-08	0
12.2	1.99011e-20	1.93904e-44	0.228958			47.451	0.00109935	0.00104321	0.0332629	0	0	1.5381e-07	1.13526e-07	0
12.3	2.39867e-20	3.10189e-44	0.228952			47.8431	0.000819167	0.00166845	0.0360895	0	0	7.5081e-07	5.49072e-07	0
12.4	2.88994e-20	4.95654e-44	0.228947			48.2353	0.000556176	0.00254294	0.0384166	0	0	2.80931e-06	2.0971e-06	0
12.5	3.48041e-20	7.91124e-44	0.228941			48.6275	0.000340632	0.00372423	0.0404058	0	0	9.6473e-06	6.79455e-06	0
12.6	4.1898e-20	1.26131e-43	0.228935			49.0196	0.000186817	0.00527179	0.0421358	0	0	2.84756e-05	1.91143e-05	0
12.7	5.04174e-20	2.0087e-43	0.228929			49.4118	9.12391e-05	0.00724095	0.0436446	0	0	7.66084e-05	4.76911e-05	0
12.8	6.06442e-20	3.19535e-43	0.228922			49.8039	3.94873e-05	0.00967339	0.0450266	0	0	0.000186654	0.000107246	0
12.9	7.29158e-20	5.07734e-43	0.228915			50.1961	1.50436e-05	0.0125836	0.0464863	0	0	0.000419051	0.000218328	0
13	8.76349e-20	8.05873e-43	0.228908			50.5882	4.97835e-06	0.0159467	0.0482644	0	0	0.000872225	0.000404764	0
13.1	1.05282e-19	1.27764e-42	0.228901			50.9804	1.3595e-06	0.0196922	0.0504792	0	0	0.00168715	0.000687421	0
13.2	1.26432e-19	2.02333e-42	0.228893			51.3725	2.65766e-07	0.0237154	0.0530111	0	0	0.00303888	0.00107836	0
13.3	1.51768e-19	3.20063e-42	0.228885			51.7647	2.78735e-08	0.0279076	0.0555301	0	0	0.00510455	0.0015805	0
13.4	1.82107e-19	5.05728e-42	0.228877			52.1569	0	0.0321849	0.0576579	0	0	0.00802145	0.00219447	0
13.5	2.18422e-19	7.982e-42	0.228868			52.549	0	0.0364969	0.0591456	0	0	0.0118533	0.00293108	0
13.6	2.61872e-19	1.2584e-41	0.228859			52.9412	0	0.0408011	0.0599634	4.50517e-11	0	0.0165864	0.00381809	0
13.7	3.13837e-19	1.98171e-41	0.22885			53.3333	0	0.0450282	0.0602841	9.81061e-10	0	0.0221563	0.00489399	0
13.8	3.75961e-19	3.11727e-41	0.22884			53.7255	0	0.0490663	0.0603997	5.26887e-09	0	0.0284769	0.00619384	0
13.9	4.50199e-19	4.89802e-41	0.228831			54.1176	0	0.0527731	0.0606192	2.15499e-08	0	0.0354418	0.00773397	0
14	5.38876e-19	7.68741e-41	0.22882			54.5098	0	0.0560039	0.0611664	7.4012e-08	0	0.0429035	0.00951412	0
14.1	6.44756e-19	1.20518e-40	0.228809			54.902	0	0.0586459	0.0621086	2.18409e-07	0	0.0506525	0.0115281	0
14.2	7.71127e-19	1.88729e-40	0.228798			55.2941	0	0.0606541	0.0633392	5.70428e-07	0	0.0584433	0.013781	0
14.3	9.21889e-19	2.95213e-40	0.228787			55.6863	0	0.0620808	0.0646386	1.41821e-06	0	0.0660467	0.0162959	0
14.4	1.10168e-18	4.61261e-40	0.228775			56.0784	0	0.0630697	0.0657946	3.41446e-06	0	0.0732802	0.0191102	0
14.5	1.31599e-18	7.19898e-40	0.228763			56.4706	0	0.0638178	0.0667001	8.26158e-06	0	0.0799707	0.0222683	0
14.6	1.57136e-18	1.1223e-39	0.22875			56.8627	0	0.0645309	0.06736	1.97152e-05	0	0.0858957	0.0258186	0
14.7	1.87551e-18	1.74766e-39	0.228737			57.2549	0	0.0654084	0.0678087	4.60189e-05	0	0.0907943	0.0298145	0
14.8	2.23762e-18	2.71844e-39	0.228723			57.6471	0	0.0666402	0.0680195	0.000103132	0	0.0944932	0.0343049	0
14.9	2.66856e-18	4.22373e-39	0.228709			58.0392	0	0.06837	0.0679075	0.000218037	0	0.0970719	0.0393119	0
15	3.18119e-18	6.55518e-39	0.228694			58.4314	0	0.0706201	0.0674093	0.000430656	0	0.0988989	0.0448008	0
15.1	3.79076e-18	1.01622e-38	0.228679			58.8235	0	0.0732394	0.0665411	0.000788068	0	0.100461	0.0506569	0
15.2	4.51528e-18	1.57362e-38	0.228664			59.2157	0	0.0759513	0.0653745	0.00133624	0	0.10208	0.0567051	0
15.3	5.37609e-18	2.43404e-38	0.228648			59.6078	0	0.0784845	0.0639635	0.00211554	0	0.103721	0.0627715	0
15.4	6.3984e-18	3.7607e-38	0.228631			60	0	0.0806935	0.0623295	0.00316837	0	0.105038	0.068793	0
15.5	7.61201e-18	5.80392e-38	0.228614			60.3922	0	0.0825814	0.0605192	0.00455687	0	0.105608	0.0748894	0
15.6	9.05211e-18	8.9472e-38	0.228596			60.7843	0	0.0842226	0.0586497	0.00637477	0	0.10516	0.0813297	0
15.7	1.07603e-17	1.37774e-37	0.228578			61.1765	0	0.0856592	0.0568573	0.00872901	0	0.103639	0.0883603	0
15.8	1.27856e-17	2.11913e-37	0.228559			61.5686	0	0.0868248	0.055167	0.0116872	0	0.101102	0.0959753	0
15.9	1.51858e-17	3.25584e-37	0.228539			61.9608	0	0.0875138	0.0533864	0.0152188	0	0.0975766	0.103749	0
16	1.80294e-17	4.99667e-37	0.228519			62.3529	0	0.0874	0.051105	0.0191785	0	0.0930132	0.11087	0
16.1	2.13967e-17	7.6597e-37	0.228498			62.7451	0	0.08612	0.0478314	0.0233453	0	0.087351	0.116394	0
16.2	2.53825e-17	1.17288e-36	0.228476			63.1373	0	0.0834109	0.0432096	0.0274834	0	0.0806234	0.119597	0
16.3	3.00985e-17	1.79396e-36	0.228454			63.5294	0	0.0792284	0.0372179	0.0313882	0	0.0730028	0.120248	0
16.4	3.56762e-17	2.74082e-36	0.228431			63.9216	0	0.0737404	0.0302463	0.034901	0	0.0647661	0.118655	0
16.5	4.22703e-17	4.18276e-36	0.228408			64.3137	0	0.0671884	0.0229987	0.0379103	0	0.0562201	0.115489	0
16.6	5.00628e-17	6.37615e-36	0.228384			64.7059	0	0.059732	0.0162568	0.0403685	0	0.0476572	0.111488	0
16.7	5.92676e-17	9.70882e-36	0.228359			65.098	0	0.0514382	0.0106307	0.0423288	0	0.0393499	0.107183	0
16.8	7.01363e-17	1.47668e-35	0.228333			65.4902	0	0.042445	0.00640829	0.0439702	0	0.0315566	0.102691	0
16.9	8.29642e-17	2.24348e-35	0.228306			65.8824	0	0.0331487	0.00355251	0.0455479	0	0.0245104	0.0976587	0
17	9.80984e-17	3.40462e-35	0.228279			66.2745	0	0.0242218	0.00180879	0.0472744	0	0.0183872	0.0914097	0
17.1	1.15946e-16	5.16093e-35	0.228251			66.6667	0	0.0164094	0.000845293	0.0492046	0	0.013279	0.0832775	0
17.2	1.36985e-16	7.8145e-35	0.228222			67.0588	0	0.0102462	0.000362428	0.0512191	0	0.00919069	0.0729912	1.09855e-10
17.3	1.61776e-16	1.18192e-34	0.228192			67.451	0	0.00588169	0.000142361	0.0531179	0	0.00605928	0.0608949	5.27297e-09
17.4	1.90975e-16	1.7856e-34	0.228161			67.8431	0	0.00310611	5.12001e-05	0.0547389	0	0.00377665	0.0479103	2.91366e-08
17.5	2.25352e-16	2.69462e-34	0.228129			68.2353	0	0.00151413	1.67242e-05	0.0560265	0	0.00220648	0.0352579	1.35803e-07
17.6	2.65809e-16	4.06182e-34	0.228097			68.6275	0	0.000684249	4.8867e-06	0.0570374	0	0.00119833	0.0240891	5.01811e-07
17.7	3.13402e-16	6.11587e-34	0.228063			69.0196	0	0.000287336	1.31412e-06	0.0579176	0	0.000599933	0.0151734	1.64292e-06
17.8	3.69365e-16	9.19832e-34	0.228029			69.4118	0	0.000111959	3.37766e-07	0.0588596	0	0.000274903	0.00875545	4.79797e-06
17.9	4.35144e-16	1.38188e-33	0.227993			69.8039	0	4.02518e-05	6.60286e-08	0.0600335	0	0.000114445	0.00460145	1.30873e-05
18	5.12428e-16	2.07371e-33	0.227957			70.1961	0	1.33979e-05	7.61437e-09	0.0615005	0	4.28724e-05	0.00219159	3.28165e-05
18.1	6.03192e-16	3.1084e-33	0.22792			70.5882	0	4.12672e-06	4.47411e-10	0.063159	0	1.42354e-05	0.000941382	7.62466e-05
18.2	7.09744e-16	4.65413e-33	0.227881			70.9804	0	1.16369e-06	0	0.0647931	0	4.09978e-06	0.000362763	0.000166071
18.3	8.34777e-16	6.96071e-33	0.227842			71.3725	0	2.63823e-07	0	0.0662043	0	9.66029e-07	0.000124357	0.000339204
18.4	9.81437e-16	1.03987e-32	0.227801			71.7647	0	4.05398e-08	0	0.0673363	0	1.78019e-07	3.67978e-05	0.000649518
18.5	1.15339e-15	1.55175e-32	0.227759			72.1569	0	6.8107e-10	0	0.0682865	0	2.31369e-08	8.87159e-06	0.00116592
18.6	1.35492e-15	2.313e-32	0.227716			72.549	0	0	0	0.0692108	0	2.3076e-09	1.77082e-06	0.00196647
18.7	1.59102e-15	3.44383e-32	0.227672			72.9412	0	0	0	0.0702064	0	0	3.00658e-07	0.00312876
18.8	1.86749e-15	5.12178e-32	0.227627			73.3333	0	0	0	0.0712649	0	0	3.64577e-08	0.00471859
18.9	2.19111e-15	7.60875e-32	0.227581			73.7255	0	0	0	0.0723096	0	0	9.6418e-10	0.00678207
19	2.56977e-15	1.12906e-31	0.227533			74.1176	0	0	0	0.0732725	0	0	0	0.00934739
19.1	3.01263e-15	1.67354e-31	0.227484			74.5098	0	0	0	0.0741273	0	0	0	0.0124376
19.2	3.53037e-15	2.47781e-31	0.227434			74.902	0	0	0	0.0748268	0	0	0	0.0160872
19.3	4.13541e-15	3.66447e-31	0.227383			75.2941	0	0	0	0.0751903	0	0	0	0.020347
19.4	4.84216e-15	5.41338e-31	0.22733			75.6863	0	0	0	0.0748519	0	0	0	0.0252508
19.5	5.66738e-15	7.988e-31	0.227276			76.0784	0	0	0	0.0733691	0	0	0	0.0307551
19.6	6.63054e-15	1.17739e-30	0.22722			76.4706	0	0	0	0.0704373	0	0	0	0.0367179
19.7	7.75422e-15	1.73347e-30	0.227163			76.8627	0	0	0	0.0660627	0	0	0	0.0429572
19.8	9.06464e-15	2.54932e-30	0.227105			77.2549	0	0	0	0.0605657	0	0	0	0.049373
19.9	1.05922e-14	3.74495e-30	0.227045			77.6471	0	0	0	0.0544255	0	0	0	0.0560056
20	1.23721e-14	5.49517e-30	0.226983			78.0392	0	0	0	0.0480796	0	0	0	0.0629577
20.1	1.44452e-14	8.0543e-30	0.22692			78.4314	0	0	0	0.0417919	0	0	0	0.0702161
20.2	1.68589e-14	1.1792e-29	0.226856			78.8235	0	0	0	0.0356473	0	0	0	0.077505
20.3	1.96678e-14	1.72449e-29	0.22679			79.2157	0	0	0	0.0296441	0	0	0	0.0843023
20.4	2.29353e-14	2.51911e-29	0.226722			79.6078	0	0	0	0.023813	0	0	0	0.0900278
20.5	2.67349e-14	3.67575e-29	0.226653			80	0	0	0	0.0182855	0	0	0	0.094282
20.6	3.11511e-14	5.35745e-29	0.226582			80.3922	0	0	0	0.0132834	0	0	0	0.0970119
20.7	3.6282e-14	7.79979e-29	0.226509			80.7843	0	0	0	0.00904319	0	0	0	0.0985481
20.8	4.22409e-14	1.13428e-28	0.226435			81.1765	0	0	0	0.00572278	0	0	0	0.0995167
20.9	4.91583e-14	1.64767e-28	0.226358			81.5686	0	0	0	0.00334305	0	0	0	0.100648
21	5.71853e-14	2.39075e-28	0.22628			81.9608	0	0	0	0.00179159	0	0	0	0.102514
21.1	6.64958e-14	3.46506e-28	0.2262			82.3529	0	0	0	0.000875906	0	0	0	0.105282
21.2	7.72907e-14	5.01649e-28	0.226119			82.7451	0	0	0	0.000388189	0	0	0	0.108608
21.3	8.98013e-14	7.25442e-28	0.226035			83.1373	0	0	0	0.000154795	0	0	0	0.111712
21.4	1.04295e-13	1.04789e-27	0.22595			83.5294	0	0	0	5.48884e-05	0	0	0	0.113608
21.5	1.21077e-13	1.51198e-27	0.225862			83.9216	0	0	0	1.68608e-05	0	0	0	0.113375
21.6	1.40504e-13	2.17915e-27	0.225772			84.3137	0	0	0	4.40425e-06	0	0	0	0.110404
21.7	1.6298e-13	3.13719e-27	0.225681			84.7059	0	0	0	9.03313e-07	0	0	0	0.104538
21.8	1.88975e-13	4.51136e-27	0.225587			85.098	0	0	0	1.03813e-07	0	0	0	0.0960973
21.9	2.19027e-13	6.48018e-27	0.225492			85.4902	0	0	0	8.9697e-09	0	0	0	0.0857362
22	2.53755e-13	9.29779e-27	0.225394			85.8824	0	0	0	2.64013e-10	0	0	0	0.0742287
22.1	2.93869e-13	1.33256e-26	0.225294			86.2745	0	0	0	0	0	0	0	0.0622794
22.2	3.40185e-13	1.90767e-26	0.225191			86.6667	0	0	0	0	0	0	0	0.0504517
22.3	3.93641e-13	2.72794e-26	0.225087			87.0588	0	0	0	0	0	0	0	0.0392101
22.4	4.5531e-13	3.89654e-26	0.22498			87.451	0	0	0	0	0	0	0	0.028991
22.5	5.26427e-13	5.55951e-26	0.224871			87.8431	0	0	0	0	0	0	0	0.0202049
22.6	6.08403e-13	7.92331e-26	0.22476			88.2353	0	0	0	0	0	0	0	0.0131542
22.7	7.02858e-13	1.12795e-25	0.224646			88.6275	0	0	0	0	0	0	0	0.00793526
22.8	8.11647e-13	1.60393e-25	0.22453			89.0196	0	0	0	0	0	0	0	0.00440375
22.9	9.36891e-13	2.27822e-25	0.224411			89.4118	0	0	0	0	0	0	0	0.0022346
23	1.08102e-12	3.23234e-25	0.22429			89.8039	0	0	0	0	0	0	0	0.0010307
23.1	1.24682e-12	4.5809e-25	0.224166			90.1961	0	0	0	0	0	0	0	0.0004292
23.2	1.43745e-12	6.48483e-25	0.22404			90.5882	0	0	0	0	0	0	0	0.000159841
23.3	1.65656e-12	9.16979e-25	0.223911			90.9804	0	0	0	0	0	0	0	5.24802e-05
23.4	1.90829e-12	1.29519e-24	0.223779			91.3725	0	0	0	0	0	0	0	1.47167e-05
23.5	2.19737e-12	1.82734e-24	0.223645			91.7647	0	0	0	0	0	0	0	3.36924e-06
23.6	2.52921e-12	2.57524e-24	0.223508			92.1569	0	0	0	0	0	0	0	5.64981e-07
23.7	2.90998e-12	3.62519e-24	0.223368			92.549	0	0	0	0	0	0	0	6.08187e-08
23.8	3.34672e-12	5.09748e-24	0.223225			92.9412	0	0	0	0	0	0	0	4.03186e-09
23.9	3.84742e-12	7.15968e-24	0.22308			93.3333	0	0	0	0	0	0	0	0
24	4.42124e-12	1.00449e-23	0.222931			93.7255	0	0	0	0	0	0	0	0
24.1	5.07856e-12	1.4077e-23	0.22278			94.1176	0	0	0	0	0	0	0	0
24.2	5.83124e-12	1.97054e-23	0.222626			94.5098	0	0	0	0	0	0	0	0
24.3	6.69273e-12	2.75534e-23	0.222469			94.902	0	0	0	0	0	0	0	0
24.4	7.67837e-12	3.84838e-23	0.222308			95.2941	0	0	0	0	0	0	0	0
24.5	8.80557e-12	5.369e-23	0.222145			95.6863	0	0	0	0	0	0	0	0
24.6	1.00941e-11	7.48207e-23	0.221978			96.0784	0	0	0	0	0	0	0	0
24.7	1.15665e-11	1.04151e-22	0.221809			96.4706	0	0	0	0	0	0	0	0
24.8	1.32483e-11	1.44816e-22	0.221636			96.8627	0	0	0	0	0	0	0	0
24.9	1.51684e-11	2.01134e-22	0.221459			97.2549	0	0	0	0	0	0	0	0
25	1.73597e-11	2.79039e-22	0.22128			97.6471	0	0	0	0	0	0	0	0
25.1	1.98595e-11	3.86685e-22	0.221097			98.0392	0	0	0	0	0	0	0	0
25.2	2.271e-11	5.35258e-22	0.220911			98.4314	0	0	0	0	0	0	0	0
25.3	2.59591e-11	7.40086e-22	0.220721			98.8235	0	0	0	0	0	0	0	0
25.4	2.96609e-11	1.02215e-21	0.220528			99.2157	0	0	0	0	0	0	0	0
25.5	3.38768e-11	1.41013e-21	0.220331			99.6078	0	0	0	0	0	0	0	0
25.6	3.86761e-11	1.94319e-21	0.220131			100	0	0	0	0	0	0	0	0
25.7	4.41373e-11	2.67477e-21	0.219927			100.392	0	0	0	0	0	0	0	0
25.8	5.03491e-11	3.67765e-21	0.21972			100.784	0	0	0	0	0	0	0	0
25.9	5.74117e-11	5.05087e-21	0.219509			101.176	0	0	0	0	0	0	0	0
26	6.54384e-11	6.92908e-21	0.219294			101.569	0	0	0	0	0	0	0	0
26.1	7.45569e-11	9.49507e-21	0.219075			101.961	0	0	0	0	0	0	0	0
26.2	8.49113e-11	1.29967e-20	0.218853			102.353	0	0	0	0	0	0	0	0
26.3	9.66643e-11	1.77697e-20	0.218627			102.745	0	0	0	0	0	0	0	0
26.4	1.09999e-10	2.42684e-20	0.218397			103.137	0	0	0	0	0	0	0	0
26.5	1.25123e-10	3.31067e-20	0.218163			103.529	0	0	0	0	0	0	0	0
26.6	1.42267e-10	4.51131e-20	0.217925			103.922	0	0	0	0	0	0	0	0
26.7	1.61695e-10	6.14048e-20	0.217683			104.314	0	0	0	0	0	0	0	0
26.8	1.83702e-10	8.34862e-20	0.217437			104.706	0	0	0	0	0	0	0	0
26.9	2.08618e-10	1.13381e-19	0.217187			105.098	0	0	0	0	0	0	0	0
27	2.36816e-10	1.53808e-19	0.216933			105.49	0	0	0	0	0	0	0	0
27.1	2.68717e-10	2.08415e-19	0.216674			105.882	0	0	0	0	0	0	0	0
27.2	3.04791e-10	2.82094e-19	0.216412			106.275	0	0	0	0	0	0	0	0
27.3	3.45567e-10	3.81392e-19	0.216145			106.667	0	0	0	0	0	0	0	0
27.4	3.91638e-10	5.15064e-19	0.215874			107.059	0	0	0	0	0	0	0	0
27.5	4.4367e-10	6.94807e-19	0.215599			107.451	0	0	0	0	0	0	0	0
27.6	5.0241e-10	9.36225e-19	0.215319			107.843	0	0	0	0	0	0	0	0
27.7	5.68695e-10	1.26011e-18	0.215035			108.235	0	0	0	0	0	0	0	0
27.8	6.43463e-10	1.69415e-18	0.214746			108.627	0	0	0	0	0	0	0	0
27.9	7.27765e-10	2.27513e-18	0.214453			109.02	0	0	0	0	0	0	0	0
28	8.22775e-10	3.05192e-18	0.214156			109.412	0	0	0	0	0	0	0	0
28.1	9.29809e-10	4.08934e-18	0.213854			109.804	0	0	0	0	0	0	0	0
28.2	1.05034e-09	5.47327e-18	0.213547			110.196	0	0	0	0	0	0	0	0
28.3	1.18601e-09	7.31734e-18	0.213236			110.588	0	0	0	0	0	0	0	0
28.4	1.33866e-09	9.77175e-18	0.21292			110.98	0	0	0	0	0	0	0	0
28.5	1.51034e-09	1.30348e-17	0.2126			111.373	0	0	0	0	0	0	0	0
28.6	1.70334e-09	1.7368e-17	0.212275			111.765	0	0	0	0	0	0	0	0
28.7	1.92022e-09	2.31157e-17	0.211945			112.157	0	0	0	0	0	0	0	0
28.8	2.16384e-09	3.07311e-17	0.21161			112.549	0	0	0	0	0	0	0	0
28.9	2.43737e-09	4.08096e-17	0.21127			112.941	0	0	0	0	0	0	0	0
29	2.74435e-09	5.41326e-17	0.210926			113.333	0	0	0	0	0	0	0	0
29.1	3.08874e-09	7.17246e-17	0.210577			113.725	0	0	0	0	0	0	0	0
29.2	3.47493e-09	9.49272e-17	0.210223			114.118	0	0	0	0	0	0	0	0
29.3	3.90781e-09	1.25495e-16	0.209864			114.51	0	0	0	0	0	0	0	0
29.4	4.39283e-09	1.6572e-16	0.2095			114.902	0	0	0	0	0	0	0	0
29.5	4.93603e-09	2.18593e-16	0.209131			115.294	0	0	0	0	0	0	0	0
29.6	5.54414e-09	2.88012e-16	0.208757			115.686	0	0	0	0	0	0	0	0
29.7	6.22463e-09	3.79051e-16	0.208378			116.078	0	0	0	0	0	0	0	0
29.8	6.98579e-09	4.98307e-16	0.207994			116.471	0	0	0	0	0	0	0	0
29.9	7.83683e-09	6.5435e-16	0.207605			116.863	0	0	0	0	0	0	0	0
30	8.78796e-09	8.58294e-16	0.207211			117.255	0	0	0	0	0	0	0	0
30.1	9.85052e-09	1.12454e-15	0.206812			117.647	0	0	0	0	0	0	0	0
30.2	1.1037e-08	1.47172e-15	0.206407			118.039	0	0	0	0	0	0	0	0
30.3	1.23614e-08	1.92394e-15	0.205998			118.431	0	0	0	0	0	0	0	0
30.4	1.38391e-08	2.51228e-15	0.205583			118.824	0	0	0	0	0	0	0	0
30.5	1.54871e-08	3.27687e-15	0.205163			119.216	0	0	0	0	0	0	0	0
30.6	1.73243e-08	4.26936e-15	0.204738			119.608	0	0	0	0	0	0	0	0
30.7	1.93716e-08	5.55621e-15	0.204308			120	0	0	0	0	0	0	0	0
30.8	2.16519e-08	7.22284e-15	0.203872			120.392	0	0	0	0	0	0	0	0
30.9	2.41908e-08	9.37886e-15	0.203432			120.784	0	0	0	0	0	0	0	0
31	2.70164e-08	1.21648e-14	0.202985			121.176	0	0	0	0	0	0	0	0
31.1	3.01597e-08	1.57606e-14	0.202534			121.569	0	0	0	0	0	0	0	0
31.2	3.3655e-08	2.03964e-14	0.202077			121.961	0	0	0	0	0	0	0	0
31.3	3.754e-08	2.63662e-14	0.201615			122.353	0	0	0	0	0	0	0	0
31.4	4.18565e-08	3.4045e-14	0.201148			122.745	0	0	0	0	0	0	0	0
31.5	4.66503e-08	4.3911e-14	0.200676			123.137	0	0	0	0	0	0	0	0
31.6	5.19719e-08	5.65726e-14	0.200198			123.529	0	0	0	0	0	0	0	0
31.7	5.7877e-08	7.28034e-14	0.199715			123.922	0	0	0	0	0	0	0	0
31.8	6.44267e-08	9.35858e-14	0.199226			124.314	0	0	0	0	0	0	0	0
31.9	7.16884e-08	1.20166e-13	0.198732			124.706	0	0	0	0	0	0	0	0
32	7.97361e-08	1.54122e-13	0.198233			125.098	0	0	0	0	0	0	0	0
32.1	8.8651e-08	1.97452e-13	0.197728			125.49	0	0	0	0	0	0	0	0
32.2	9.85225e-08	2.52681e-13	0.197219			125.882	0	0	0	0	0	0	0	0
32.3	1.09449e-07	3.22994e-13	0.196704			126.275	0	0	0	0	0	0	0	0
32.4	1.21537e-07	4.12412e-13	0.196183			126.667	0	0	0	0	0	0	0	0
32.5	1.34905e-07	5.25993e-13	0.195657			127.059	0	0	0	0	0	0	0	0
32.6	1.49682e-07	6.70103e-13	0.195126			127.451	0	0	0	0	0	0	0	0
32.7	1.66011e-07	8.52738e-13	0.19459			127.843	0	0	0	0	0	0	0	0
32.8	1.84046e-07	1.08394e-12	0.194048			128.235	0	0	0	0	0	0	0	0
32.9	2.03957e-07	1.37627e-12	0.193501			128.627	0	0	0	0	0	0	0	0
33	2.2593e-07	1.74549e-12	0.192949			129.02	0	0	0	0	0	0	0	0
33.1	2.50167e-07	2.21128e-12	0.192392			129.412	0	0	0	0	0	0	0	0
33.2	2.76893e-07	2.79822e-12	0.191829			129.804	0	0	0	0	0	0	0	0
33.3	3.06348e-07	3.53699e-12	0.191261			130.196	0	0	0	0	0	0	0	0
33.4	3.38798e-07	4.4658e-12	0.190688			130.588	0	0	0	0	0	0	0	0
33.5	3.74534e-07	5.63219e-12	0.19011			130.98	0	0	0	0	0	0	0	0
33.6	4.13869e-07	7.09525e-12	0.189527			131.373	0	0	0	0	0	0	0	0
33.7	4.57149e-07	8.92836e-12	0.188938			131.765	0	0	0	0	0	0	0	0
33.8	5.0475e-07	1.12225e-11	0.188345			132.157	0	0	0	0	0	0	0	0
33.9	5.57079e-07	1.40902e-11	0.187746			132.549	0	0	0	0	0	0	0	0
34	6.14583e-07	1.7671e-11	0.187142			132.941	0	0	0	0	0	0	0	0
34.1	6.77747e-07	2.21368e-11	0.186534			133.333	0	0	0	0	0	0	0	0
34.2	7.47097e-07	2.77003e-11	0.18592			133.725	0	0	0	0	0	0	0	0
34.3	8.23208e-07	3.4623e-11	0.185301			134.118	0	0	0	0	0	0	0	0
34.4	9.06703e-07	4.32274e-11	0.184678			134.51	0	0	0	0	0	0	0	0
34.5	9.9826e-07	5.39096e-11	0.18405			134.902	0	0	0	0	0	0	0	0
34.6	1.09861e-06	6.71562e-11	0.183416			135.294	0	0	0	0	0	0	0	0
34.7	1.20856e-06	8.3564e-11	0.182778			135.686	0	0	0	0	0	0	0	0
34.8	1.32897e-06	1.03864e-10	0.182135			136.078	0	0	0	0	0	0	0	0
34.9	1.46078e-06	1.28951e-10	0.181488			136.471	0	0	0	0	0	0	0	0
35	1.60501e-06	1.59917e-10	0.180836			136.863	0	0	0	0	0	0	0	0
35.1	1.76276e-06	1.98098e-10	0.180179			137.255	0	0	0	0	0	0	0	0
35.2	1.93523e-06	2.45119e-10	0.179517			137.647	0	0	0	0	0	0	0	0
35.3	2.12371e-06	3.02961e-10	0.178851			138.039	0	0	0	0	0	0	0	0
35.4	2.32959e-06	3.74034e-10	0.178181			138.431	0	0	0	0	0	0	0	0
35.5	2.55438e-06	4.61261e-10	0.177506			138.824	0	0	0	0	0	0	0	0
35.6	2.79973e-06	5.68193e-10	0.176826			139.216	0	0	0	0	0	0	0	0
35.7	3.06739e-06	6.9913e-10	0.176143			139.608	0	0	0	0	0	0	0	0
35.8	3.35927e-06	8.59276e-10	0.175455			140	0	0	0	0	0	0	0	0
35.9	3.67743e-06	1.05492e-09	0.174762			140.392	0	0	0	0	0	0	0	0
36	4.02408e-06	1.29366e-09	0.174066			140.784	0	0	0	0	0	0	0	0
36.1	4.4016e-06	1.58466e-09	0.173365			141.176	0	0	0	0	0	0	0	0
36.2	4.81258e-06	1.93893e-09	0.172661			141.569	0	0	0	0	0	0	0	0
36.3	5.2598e-06	2.36974e-09	0.171952			141.961	0	0	0	0	0	0	0	0
36.4	5.74622e-06	2.89303e-09	0.17124			142.353	0	0	0	0	0	0	0	0
36.5	6.27507e-06	3.52792e-09	0.170523			142.745	0	0	0	0	0	0	0	0
36.6	6.8498e-06	4.29731e-09	0.169803			143.137	0	0	0	0	0	0	0	0
36.7	7.47412e-06	5.22863e-09	0.169079			143.529	0	0	0	0	0	0	0	0
36.8	8.15201e-06	6.35466e-09	0.168351			143.922	0	0	0	0	0	0	0	0
36.9	8.88777e-06	7.71453e-09	0.16762			144.314	0	0	0	0	0	0	0	0
37	9.68598e-06	9.3549e-09	0.166885			144.706	0	0	0	0	0	0	0	0
37.1	1.05516e-05	1.13314e-08	0.166147			145.098	0	0	0	0	0	0	0	0
37.2	1.14898e-05	1.371e-08	0.165405			145.49	0	0	0	0	0	0	0	0
37.3	1.25064e-05	1.65694e-08	0.16466			145.882	0	0	0	0	0	0	0	0
37.4	1.36074e-05	2.00027e-08	0.163912			146.275	0	0	0	0	0	0	0	0
37.5	1.47993e-05	2.41203e-08	0.16316			146.667	0	0	0	0	0	0	0	0
37.6	1.6089e-05	2.90529e-08	0.162406			147.059	0	0	0	0	0	0	0	0
37.7	1.7484e-05	3.49551e-08	0.161648			147.451	0	0	0	0	0	0	0	0
37.8	1.89921e-05	4.20091e-08	0.160887			147.843	0	0	0	0	0	0	0	0
37.9	2.0622e-05	5.04301e-08	0.160124			148.235	0	0	0	0	0	0	0	0
38	2.23826e-05	6.04712e-08	0.159357			148.627	0	0	0	0	0	0	0	0
38.1	2.42836e-05	7.24304e-08	0.158588			149.02	0	0	0	0	0	0	0	0
38.2	2.63353e-05	8.66574e-08	0.157817			149.412	0	0	0	0	0	0	0	0
38.3	2.85488e-05	1.03563e-07	0.157042			149.804	0	0	0	0	0	0	0	0
38.4	3.09356e-05	1.23627e-07	0.156266			150.196	0	0	0	0	0	0	0	0
38.5	3.35083e-05	1.47414e-07	0.155486			150.588	0	0	0	0	0	0	0	0
38.6	3.62802e-05	1.7558e-07	0.154705			150.98	0	0	0	0	0	0	0	0
38.7	3.92654e-05	2.08893e-07	0.153921			151.373	0	0	0	0	0	0	0	0
38.8	4.24789e-05	2.48248e-07	0.153135			151.765	0	0	0	0	0	0	0	0
38.9	4.59366e-05	2.94687e-07	0.152347			152.157	0	0	0	0	0	0	0	0
39	4.96555e-05	3.49421e-07	0.151557			152.549	0	0	0	0	0	0	0	0
39.1	5.36536e-05	4.13857e-07	0.150765			152.941	0	0	0	0	0	0	0	0
39.2	5.795e-05	4.89626e-07	0.149972			153.333	0	0	0	0	0	0	0	0
39.3	6.2565e-05	5.78618e-07	0.149176			153.725	0	0	0	0	0	0	0	0
39.4	6.75199e-05	6.83017e-07	0.148379			154.118	0	0	0	0	0	0	0	0
39.5	7.28374e-05	8.05349e-07	0.14758			154.51	0	0	0	0	0	0	0	0
39.6	7.85418e-05	9.48527e-07	0.14678			154.902	0	0	0	0	0	0	0	0
39.7	8.46584e-05	1.11591e-06	0.145978			155.294	0	0	0	0	0	0	0	0
39.8	9.12141e-05	1.31135e-06	0.145176			155.686	0	0	0	0	0	0	0	0
39.9	9.82373e-05	1.5393e-06	0.144371			156.078	0	0	0	0	0	0	0	0
40	0.000105758	1.80485e-06	0.143566			156.471	0	0	0	0	0	0	0	0
40.1	0.000113809	2.11384e-06	0.14276			156.863	0	0	0	0	0	0	0	0
40.2	0.000122422	2.47295e-06	0.141953			157.255	0	0	0	0	0	0	0	0
40.3	0.000131633	2.88982e-06	0.141144			157.647	0	0	0	0	0	0	0	0
40.4	0.00014148	3.37319e-06	0.140335			158.039	0	0	0	0	0	0	0	0
40.5	0.000152001	3.93299e-06	0.139526			158.431	0	0	0	0	0	0	0	0
40.6	0.000163238	4.58055e-06	0.138716			158.824	0	0	0	0	0	0	0	0
40.7	0.000175234	5.32874e-06	0.137905			159.216	0	0	0	0	0	0	0	0
40.8	0.000188036	6.19221e-06	0.137093			159.608	0	0	0	0	0	0	0	0
40.9	0.00020169	7.18752e-06	0.136282			160	0	0	0	0	0	0	0	0
41	0.000216247	8.33347e-06	0.13547			160.392	0	0	0	0	0	0	0	0
41.1	0.000231761	9.65128e-06	0.134658			160.784	0	0	0	0	0	0	0	0
41.2	0.000248286	1.1165e-05	0.133846			161.176	0	0	0	0	0	0	0	0
41.3	0.000265882	1.29016e-05	0.133033			161.569	0	0	0	0	0	0	0	0
41.4	0.000284608	1.48916e-05	0.132221			161.961	0	0	0	0	0	0	0	0
41.5	0.000304528	1.71693e-05	0.131409			162.353	0	0	0	0	0	0	0	0
41.6	0.000325711	1.97732e-05	0.130597			162.745	0	0	0	0	0	0	0	0
41.7	0.000348224	2.27464e-05	0.129786			163.137	0	0	0	0	0	0	0	0
41.8	0.000372142	2.61374e-05	0.128975			163.529	0	0	0	0	0	0	0	0
41.9	0.000397541	3.00003e-05	0.128164			163.922	0	0	0	0	0	0	0	0
42	0.0004245	3.43955e-05	0.127354			164.314	0	0	0	0	0	0	0	0
42.1	0.000453102	3.93903e-05	0.126545			164.706	0	0	0	0	0	0	0	0
42.2	0.000483434	4.506e-05	0.125736			165.098	0	0	0	0	0	0	0	0
42.3	0.000515587	5.14879e-05	0.124928			165.49	0	0	0	0	0	0	0	0
42.4	0.000549654	5.87669e-05	0.124121			165.882	0	0	0	0	0	0	0	0
42.5	0.000585732	6.69997e-05	0.123315			166.275	0	0	0	0	0	0	0	0
42.6	0.000623925	7.63003e-05	0.12251			166.667	0	0	0	0	0	0	0	0
42.7	0.000664337	8.67945e-05	0.121706			167.059	0	0	0	0	0	0	0	0
42.8	0.000707078	9.86214e-05	0.120903			167.451	0	0	0	0	0	0	0	0
42.9	0.000752262	0.000111934	0.120102			167.843	0	0	0	0	0	0	0	0
43	0.000800007	0.000126902	0.119301			168.235	0	0	0	0	0	0	0	0
43.1	0.000850435	0.00014371	0.118503			168.627	0	0	0	0	0	0	0	0
43.2	0.000903674	0.000162561	0.117705			169.02	0	0	0	0	0	0	0	0
43.3	0.000959854	0.000183679	0.116909			169.412	0	0	0	0	0	0	0	0
43.4	0.00101911	0.000207308	0.116115			169.804	0	0	0	0	0	0	0	0
43.5	0.00108158	0.000233715	0.115323			170.196	0	0	0	0	0	0	0	0
43.6	0.00114742	0.000263189	0.114532			170.588	0	0	0	0	0	0	0	0
43.7	0.00121677	0.000296049	0.113743			170.98	0	0	0	0	0	0	0	0
43.8	0.00128978	0.000332638	0.112956			171.373	0	0	0	0	0	0	0	0
43.9	0.00136661	0.00037333	0.112171			171.765	0	0	0	0	0	0	0	0
44	0.00144744	0.00041853	0.111388			172.157	0	0	0	0	0	0	0	0
44.1	0.00153241	0.000468677	0.110607			172.549	0	0	0	0	0	0	0	0
44.2	0.00162172	0.000524243	0.109828			172.941	0	0	0	0	0	0	0	0
44.3	0.00171553	0.000585741	0.109051			173.333	0	0	0	0	0	0	0	0
44.4	0.00181402	0.000653719	0.108277			173.725	0	0	0	0	0	0	0	0
44.5	0.00191739	0.000728769	0.107504			174.118	0	0	0	0	0	0	0	0
44.6	0.00202583	0.000811524	0.106735			174.51	0	0	0	0	0	0	0	0
44.7	0.00213952	0.000902663	0.105967			174.902	0	0	0	0	0	0	0	0
44.8	0.00225867	0.00100291	0.105202			175.294	0	0	0	0	0	0	0	0
44.9	0.00238349	0.00111305	0.10444			175.686	0	0	0	0	0	0	0	0
45	0.00251418	0.00123389	0.103681			176.078	0	0	0	0	0	0	0	0
45.1	0.00265095	0.00136632	0.102923			176.471	0	0	0	0	0	0	0	0
45.2	0.00279402	0.00151127	0.102169			176.863	0	0	0	0	0	0	0	0
45.3	0.00294361	0.00166972	0.101418			177.255	0	0	0	0	0	0	0	0
45.4	0.00309995	0.00184271	0.100669			177.647	0	0	0	0	0	0	0	0
45.5	0.00326326	0.00203135	0.0999228			178.039	0	0	0	0	0	0	0	0
45.6	0.00343378	0.00223679	0.0991797			178.431	0	0	0	0	0	0	0	0
45.7	0.00361173	0.00246025	0.0984396			178.824	0	0	0	0	0	0	0	0
45.8	0.00379735	0.002703	0.0977025			179.216	0	0	0	0	0	0	0	0
45.9	0.00399089	0.00296637	0.0969684			179.608	0	0	0	0	0	0	0	0
46	0.00419258	0.00325175	0.0962374			180	0	0	0	0	0	0	0	0
46.1	0.00440267	0.0035606	0.0955095			180.392	0	0	0	0	0	0	0	0
46.2	0.0046214	0.0038944	0.0947847			180.784	0	0	0	0	0	0	0	0
46.3	0.00484901	0.00425473	0.0940631			181.176	0	0	0	0	0	0	0	0
46.4	0.00508577	0.00464318	0.0933448			181.569	0	0	0	0	0	0	0	0
46.5	0.00533191	0.00506142	0.0926297			181.961	0	0	0	0	0	0	0	0
46.6	0.00558768	0.00551115	0.091918			182.353	0	0	0	0	0	0	0	0
46.7	0.00585334	0.00599411	0.0912095			182.745	0	0	0	0	0	0	0	0
46.8	0.00612912	0.00651209	0.0905045			183.137	0	0	0	0	0	0	0	0
46.9	0.00641529	0.0070669	0.0898028			183.529	0	0	0	0	0	0	0	0
47	0.00671207	0.00766038	0.0891046			183.922	0	0	0	0	0	0	0	0
47.1	0.00701973	0.0082944	0.0884098			184.314	0	0	0	0	0	0	0	0
47.2	0.00733849	0.00897082	0.0877185			184.706	0	0	0	0	0	0	0	0
47.3	0.0076686	0.00969153	0.0870308			185.098	0	0	0	0	0	0	0	0
47.4	0.00801029	0.0104584	0.0863466			185.49	0	0	0	0	0	0	0	0
47.5	0.00836379	0.0112733	0.0856659			185.882	0	0	0	0	0	0	0	0
47.6	0.00872933	0.0121381	0.0849889			186.275	0	0	0	0	0	0	0	0
47.7	0.00910714	0.0130546	0.0843155			186.667	0	0	0	0	0	0	0	0
47.8	0.00949742	0.0140245	0.0836457			187.059	0	0	0	0	0	0	0	0
47.9	0.00990039	0.0150496	0.0829796			187.451	0	0	0	0	0	0	0	0
48	0.0103163	0.0161315	0.0823172			187.843	0	0	0	0	0	0	0	0
48.1	0.0107452	0.0172718	0.0816585			188.235	0	0	0	0	0	0	0	0
48.2	0.0111874	0.018472	0.0810035			188.627	0	0	0	0	0	0	0	0
48.3	0.0116431	0.0197335	0.0803522			189.02	0	0	0	0	0	0	0	0
48.4	0.0121124	0.0210575	0.0797048			189.412	0	0	0	0	0	0	0	0
48.5	0.0125954	0.0224451	0.079061			189.804	0	0	0	0	0	0	0	0
48.6	0.0130924	0.0238973	0.0784211			190.196	0	0	0	0	0	0	0	0
48.7	0.0136035	0.025415	0.077785			190.588	0	0	0	0	0	0	0	0
48.8	0.0141287	0.0269988	0.0771527			190.98	0	0	0	0	0	0	0	0
48.9	0.0146683	0.0286491	0.0765242			191.373	0	0	0	0	0	0	0	0
49	0.0152222	0.0303662	0.0758996			191.765	0	0	0	0	0	0	0	0
49.1	0.0157906	0.0321502	0.0752788			192.157	0	0	0	0	0	0	0	0
49.2	0.0163736	0.0340008	0.0746619			192.549	0	0	0	0	0	0	0	0
49.3	0.0169711	0.0359176	0.0740489			192.941	0	0	0	0	0	0	0	0
49.4	0.0175833	0.0379	0.0734397			193.333	0	0	0	0	0	0	0	0
49.5	0.0182101	0.0399469	0.0728344			193.725	0	0	0	0	0	0	0	0
49.6	0.0188517	0.0420572	0.072233			194.118	0	0	0	0	0	0	0	0
49.7	0.0195078	0.0442293	0.0716355			194.51	0	0	0	0	0	0	0	0
49.8	0.0201786	0.0464615	0.0710419			194.902	0	0	0	0	0	0	0	0
49.9	0.0208639	0.0487517	0.0704522			195.294	0	0	0	0	0	0	0	0
50	0.0215636	0.0510973	0.0698664			195.686	0	0	0	0	0	0	0	0
50.1	0.0222778	0.0534958	0.0692845			196.078	0	0	0	0	0	0	0	0
50.2	0.0230063	0.0559441	0.0687065			196.471	0	0	0	0	0	0	0	0
50.3	0.0237488	0.0584389	0.0681324			196.863	0	0	0	0	0	0	0	0
50.4	0.0245054	0.0609765	0.0675623			197.255	0	0	0	0	0	0	0	0
50.5	0.0252757	0.063553	0.066996			197.647	0	0	0	0	0	0	0	0
50.6	0.0260596	0.0661641	0.0664337			198.039	0	0	0	0	0	0	0	0
50.7	0.0268569	0.0688053	0.0658752			198.431	0	0	0	0	0	0	0	0
50.8	0.0276673	0.0714717	0.0653207			198.824	0	0	0	0	0	0	0	0
50.9	0.0284905	0.0741582	0.06477			199.216	0	0	0	0	0	0	0	0
51	0.0293263	0.0768594	0.0642233			199.608	0	0	0	0	0	0	0	0
51.1	0.0301742	0.0795698	0.0636805			200	0	0	0	0	0	0	0	0
51.2	0.0310341	0.0822833	0.0631415			200.392	0	0	0	0	0	0	0	0
51.3	0.0319054	0.0849941	0.0626064
51.4	0.0327878	0.0876957	0.0620752
51.5	0.0336808	0.0903818	0.0615479
51.6	0.0345841	0.0930457	0.0610244
51.7	0.0354972	0.0956808	0.0605047
51.8	0.0364195	0.0982802	0.0599889
51.9	0.0373505	0.100837	0.059477
52	0.0382897	0.103345	0.0589689
52.1	0.0392365	0.105796	0.0584645
52.2	0.0401903	0.108183	0.057964
52.3	0.0411505	0.110501	0.0574673
52.4	0.0421165	0.112742	0.0569744
52.5	0.0430876	0.114899	0.0564852
52.6	0.0440631	0.116967	0.0559998
52.7	0.0450424	0.118938	0.0555181
52.8	0.0460246	0.120806	0.0550402
52.9	0.047009	0.122567	0.054566
53	0.047995	0.124214	0.0540955
53.1	0.0489816	0.125742	0.0536286
53.2	0.0499682	0.127145	0.0531655
53.3	0.0509538	0.128421	0.052706
53.4	0.0519377	0.129564	0.0522502
53.5	0.052919	0.13057	0.051798
53.6	0.0538969	0.131437	0.0513494
53.7	0.0548704	0.132162	0.0509044
53.8	0.0558388	0.132741	0.050463
53.9	0.0568011	0.133173	0.0500252
54	0.0577564	0.133457	0.0495909
54.1	0.0587038	0.133592	0.0491601
54.2	0.0596425	0.133577	0.0487329
54.3	0.0605714	0.133413	0.0483091
54.4	0.0614898	0.133099	0.0478889
54.5	0.0623966	0.132637	0.0474721
54.6	0.063291	0.132028	0.0470587
54.7	0.064172	0.131275	0.0466488
54.8	0.0650388	0.13038	0.0462422
54.9	0.0658903	0.129346	0.0458391
55	0.0667259	0.128176	0.0454393
55.1	0.0675444	0.126875	0.0450429
55.2	0.0683452	0.125446	0.0446498
55.3	0.0691272	0.123894	0.04426
55.4	0.0698897	0.122224	0.0438736
55.5	0.0706317	0.120441	0.0434903
55.6	0.0713526	0.118551	0.0431104
55.7	0.0720514	0.116561	0.0427336
55.8	0.0727274	0.114475	0.0423601
55.9	0.0733798	0.1123	0.0419898
56	0.0740079	0.110043	0.0416226
56.1	0.0746109	0.107711	0.0412586
56.2	0.0751882	0.10531	0.0408978
56.3	0.075739	0.102847	0.04054
56.4	0.0762628	0.100329	0.0401853
56.5	0.0767589	0.0977635	0.0398337
56.6	0.0772267	0.0951564	0.0394852
56.7	0.0776657	0.092515	0.0391397
56.8	0.0780753	0.0898461	0.0387971
56.9	0.0784551	0.0871564	0.0384576
57	0.0788046	0.0844525	0.0381211
57.1	0.0791234	0.0817407	0.0377875
57.2	0.0794111	0.0790272	0.0374568
57.3	0.0796674	0.0763183	0.037129
57.4	0.0798918	0.0736195	0.0368041
57.5	0.0800843	0.0709366	0.0364821
57.6	0.0802445	0.0682749	0.0361629
57.7	0.0803722	0.0656394	0.0358465
57.8	0.0804673	0.0630348	0.0355329
57.9	0.0805297	0.0604658	0.0352221
58	0.0805592	0.0579364	0.0349141
58.1	0.0805559	0.0554507	0.0346088
58.2	0.0805198	0.053012	0.0343062
58.3	0.0804509	0.0506239	0.0340064
58.4	0.0803492	0.0482891	0.0337092
58.5	0.080215	0.0460104	0.0334146
58.6	0.0800484	0.04379	0.0331227
58.7	0.0798495	0.0416301	0.0328334
58.8	0.0796186	0.0395324	0.0325467
58.9	0.0793561	0.0374983	0.0322626
59	0.0790621	0.035529	0.031981
59.1	0.0787372	0.0336254	0.031702
59.2	0.0783816	0.031788	0.0314255
59.3	0.0779958	0.0300175	0.0311514
59.4	0.0775802	0.0283137	0.0308799
59.5	0.0771354	0.0266767	0.0306108
59.6	0.0766619	0.0251062	0.0303441
59.7	0.0761602	0.0236017	0.0300799
59.8	0.075631	0.0221624	0.029818
59.9	0.0750748	0.0207876	0.0295585
60	0.0744924	0.0194762	0.0293014
60.1	0.0738843	0.0182271	0.0290466
60.2	0.0732513	0.017039	0.0287941
60.3	0.0725941	0.0159105	0.0285439
60.4	0.0719134	0.0148401	0.028296
60.5	0.0712102	0.0138261	0.0280504
60.6	0.070485	0.012867	0.027807
60.7	0.0697388	0.0119611	0.0275658
60.8	0.0689723	0.0111064	0.0273268
60.9	0.0681865	0.0103012	0.02709
61	0.0673821	0.00954375	0.0268554
61.1	0.0665601	0.00883205	0.0266229
61.2	0.0657213	0.00816426	0.0263925
61.3	0.0648666	0.0075385	0.0261642
61.4	0.0639969	0.00695291	0.0259381
61.5	0.0631131	0.00640561	0.025714
61.6	0.0622162	0.00589478	0.0254919
61.7	0.061307	0.0054186	0.0252719
61.8	0.0603865	0.00497531	0.0250539
61.9	0.0594555	0.00456316	0.0248379
62	0.058515	0.00418047	0.0246239
62.1	0.0575659	0.00382557	0.0244119
62.2	0.0566092	0.00349688	0.0242018
62.3	0.0556456	0.00319285	0.0239936
62.4	0.0546761	0.00291198	0.0237874
62.5	0.0537016	0.00265284	0.023583
62.6	0.052723	0.00241406	0.0233805
62.7	0.0517411	0.0021943	0.0231799
62.8	0.0507568	0.00199232	0.0229811
62.9	0.0497709	0.0018069	0.0227842
63	0.0487843	0.0016369	0.0225891
63.1	0.0477977	0.00148123	0.0223957
63.2	0.046812	0.00133886	0.0222042
63.3	0.0458279	0.00120882	0.0220144
63.4	0.0448463	0.00109019	0.0218264
63.5	0.0438677	0.000982097	0.0216401
63.6	0.042893	0.00088373	0.0214555
63.7	0.0419229	0.000794324	0.0212726
63.8	0.040958	0.000713163	0.0210914
63.9	0.039999	0.000639577	0.0209118
64	0.0390465	0.000572941	0.0207339
64.1	0.0381012	0.000512672	0.0205577
64.2	0.0371636	0.000458229	0.0203831
64.3	0.0362343	0.000409108	0.0202101
64.4	0.0353138	0.000364844	0.0200386
64.5	0.0344027	0.000325004	0.0198688
64.6	0.0335014	0.00028919	0.0197005
64.7	0.0326104	0.000257034	0.0195338
64.8	0.0317302	0.000228197	0.0193686
64.9	0.0308612	0.000202369	0.0192049
65	0.0300037	0.000179263	0.0190428
65.1	0.0291581	0.000158617	0.0188821
65.2	0.0283249	0.000140191	0.0187229
65.3	0.0275042	0.000123767	0.0185652
65.4	0.0266964	0.000109145	0.0184089
65.5	0.0259018	9.61423e-05	0.0182541
65.6	0.0251205	8.45937e-05	0.0181007
65.7	0.024353	7.43489e-05	0.0179487
65.8	0.0235992	6.52716e-05	0.017798
65.9	0.0228594	5.72382e-05	0.0176488
66	0.0221338	5.01374e-05	0.017501
66.1	0.0214225	4.38682e-05	0.0173545
66.2	0.0207256	3.83399e-05	0.0172093
66.3	0.0200432	3.34707e-05	0.0170655
66.4	0.0193754	2.91872e-05	0.016923
66.5	0.0187222	2.54233e-05	0.0167819
66.6	0.0180836	2.212e-05	0.016642
66.7	0.0174597	1.92243e-05	0.0165034
66.8	0.0168504	1.66889e-05	0.016366
66.9	0.0162558	1.44717e-05	0.01623
67	0.0156758	1.2535e-05	0.0160951
67.1	0.0151103	1.08453e-05	0.0159615
67.2	0.0145592	9.37286e-06	0.0158292
67.3	0.0140225	8.09125e-06	0.015698
67.4	0.0135001	6.97704e-06	0.0155681
67.5	0.0129919	6.00953e-06	0.0154393
67.6	0.0124977	5.17038e-06	0.0153117
67.7	0.0120174	4.44342e-06	0.0151853
67.8	0.0115509	3.81439e-06	0.01506
67.9	0.0110979	3.27074e-06	0.0149359
68	0.0106584	2.80143e-06	0.0148129
68.1	0.010232	2.39677e-06	0.014691
68.2	0.00981878	2.04826e-06	0.0145703
68.3	0.00941836	1.74847e-06	0.0144506
68.4	0.00903059	1.49088e-06	0.014332
68.5	0.00865525	1.26982e-06	0.0142145
68.6	0.00829213	1.08032e-06	0.0140981
68.7	0.00794101	9.1807e-07	0.0139828
68.8	0.00760166	7.79314e-07	0.0138685
68.9	0.00727384	6.60788e-07	0.0137552
69	0.00695732	5.59661e-07	0.0136429
69.1	0.00665186	4.73479e-07	0.0135317
69.2	0.00635721	4.00119e-07	0.0134215
69.3	0.00607315	3.37746e-07	0.0133123
69.4	0.00579941	2.84777e-07	0.0132041
69.5	0.00553575	2.39846e-07	0.0130968
69.6	0.00528192	2.01777e-07	0.0129906
69.7	0.00503768	1.69561e-07	0.0128852
69.8	0.00480277	1.42328e-07	0.0127809
69.9	0.00457695	1.19336e-07	0.0126775
70	0.00435996	9.99454e-08	0.012575
70.1	0.00415158	8.36118e-08	0.0124734
70.2	0.00395154	6.98691e-08	0.0123728
70.3	0.0037596	5.83198e-08	0.0122731
70.4	0.00357553	4.8625e-08	0.0121742
70.5	0.00339909	4.04963e-08	0.0120763
70.6	0.00323003	3.36888e-08	0.0119793
70.7	0.00306813	2.79942e-08	0.0118831
70.8	0.00291316	2.32361e-08	0.0117877
70.9	0.00276489	1.92651e-08	0.0116933
71	0.0026231	1.59548e-08	0.0115997
71.1	0.00248756	1.31985e-08	0.0115069
71.2	0.00235806	1.09062e-08	0.011415
71.3	0.0022344	9.00186e-09	0.0113238
71.4	0.00211635	7.42173e-09	0.0112335
71.5	0.00200373	6.1121e-09	0.011144
71.6	0.00189632	5.02793e-09	0.0110554
71.7	0.00179394	4.13143e-09	0.0109675
71.8	0.0016964	3.39098e-09	0.0108803
71.9	0.0016035	2.78011e-09	0.010794
72	0.00151508	2.27673e-09	0.0107084
72.1	0.00143095	1.86241e-09	0.0106236
72.2	0.00135093	1.52178e-09	0.0105396
72.3	0.00127488	1.24205e-09	0.0104563
72.4	0.00120261	1.01261e-09	0.0103737
72.5	0.00113398	8.24626e-10	0.0102919
72.6	0.00106883	6.70787e-10	0.0102108
72.7	0.00100701	5.45036e-10	0.0101304
72.8	0.000948376	4.42363e-10	0.0100508
72.9	0.000892795	3.58629e-10	0.0099718
73	0.000840129	2.90419e-10	0.00989354
73.1	0.000790247	2.34918e-10	0.00981598
73.2	0.000743024	1.89811e-10	0.0097391
73.3	0.000698338	1.53193e-10	0.0096629
73.4	0.000656072	1.23501e-10	0.00958737
73.5	0.000616112	9.94523e-11	0.00951251
73.6	0.000578351	7.99966e-11	0.00943831
73.7	0.000542682	6.42749e-11	0.00936476
73.8	0.000509006	5.1585e-11	0.00929186
73.9	0.000477225	4.13542e-11	0.00921961
74	0.000447246	3.31152e-11	0.00914798
74.1	0.000418979	2.6488e-11	0.00907699
74.2	0.000392339	2.11633e-11	0.00900662
74.3	0.000367243	1.689e-11	0.00893687
74.4	0.000343612	1.34645e-11	0.00886772
74.5	0.00032137	1.07217e-11	0.00879919
74.6	0.000300446	8.52805e-12	0.00873125
74.7	0.000280769	6.77562e-12	0.00866391
74.8	0.000262274	5.37725e-12	0.00859716
74.9	0.000244898	4.26271e-12	0.00853098
75	0.000228579	3.37538e-12	0.00846539
75.1	0.000213261	2.66977e-12	0.00840037
75.2	0.000198888	2.10929e-12	0.00833591
75.3	0.000185409	1.66461e-12	0.00827202
75.4	0.000172772	1.31221e-12	0.00820868
75.5	0.000160931	1.03325e-12	0.00814589
75.6	0.000149841	8.12681e-13	0.00808364
75.7	0.000139458	6.38481e-13	0.00802194
75.8	0.000129741	5.01059e-13	0.00796077
75.9	0.000120652	3.92774e-13	0.00790013
76	0.000112155	3.07546e-13	0.00784001
76.1	0.000104213	2.40541e-13	0.00778041
76.2	9.67939e-05	1.87924e-13	0.00772133
76.3	8.98665e-05	1.46652e-13	0.00766276
76.4	8.34008e-05	1.14316e-13	0.00760469
76.5	7.73688e-05	8.90096e-14	0.00754713
76.6	7.17438e-05	6.92279e-14	0.00749006
76.7	6.65006e-05	5.37822e-14	0.00743348
76.8	6.16155e-05	4.17358e-14	0.00737738
76.9	5.70659e-05	3.23513e-14	0.00732177
77	5.28308e-05	2.50488e-14	0.00726664
77.1	4.889e-05	1.9373e-14	0.00721197
77.2	4.52247e-05	1.49664e-14	0.00715778
77.3	4.18172e-05	1.15492e-14	0.00710405
77.4	3.86506e-05	8.90226e-15	0.00705078
77.5	3.57093e-05	6.85426e-15	0.00699796
77.6	3.29783e-05	5.2715e-15	0.00694559
77.7	3.04438e-05	4.04968e-15	0.00689368
77.8	2.80926e-05	3.10756e-15	0.0068422
77.9	2.59124e-05	2.38195e-15	0.00679116
78	2.38917e-05	1.82372e-15	0.00674055
78.1	2.20196e-05	1.39475e-15	0.00669038
78.2	2.02859e-05	1.06548e-15	0.00664063
78.3	1.86811e-05	8.13036e-16	0.0065913
78.4	1.71962e-05	6.19707e-16	0.00654239
78.5	1.58229e-05	4.7182e-16	0.0064939
78.6	1.45533e-05	3.58822e-16	0.00644581
78.7	1.33802e-05	2.7258e-16	0.00639814
78.8	1.22966e-05	2.06834e-16	0.00635086
78.9	1.12961e-05	1.5677e-16	0.00630398
79	1.03728e-05	1.18691e-16	0.0062575
79.1	9.52111e-06	8.97605e-17	0.00621141
79.2	8.73577e-06	6.78056e-17	0.00616571
79.3	8.01195e-06	5.11633e-17	0.00612039
79.4	7.3451e-06	3.85624e-17	0.00607545
79.5	6.73101e-06	2.90324e-17	0.00603089
79.6	6.16574e-06	2.18331e-17	0.0059867
79.7	5.64565e-06	1.64006e-17	0.00594289
79.8	5.16732e-06	1.2306e-17	0.00589943
79.9	4.72758e-06	9.22332e-18	0.00585635
80	4.32351e-06	6.90511e-18	0.00581362
80.1	3.95235e-06	5.16377e-18	0.00577125
80.2	3.61159e-06	3.85724e-18	0.00572923
80.3	3.29886e-06	2.87805e-18	0.00568756
80.4	3.01199e-06	2.14503e-18	0.00564624
80.5	2.74893e-06	1.59691e-18	0.00560526
80.6	2.50783e-06	1.18752e-18	0.00556463
80.7	2.28695e-06	8.82096e-19	0.00552433
80.8	2.08467e-06	6.5449e-19	0.00548436
80.9	1.8995e-06	4.85068e-19	0.00544473
81	1.73008e-06	3.591e-19	0.00540542
81.1	1.57512e-06	2.65546e-19	0.00536644
81.2	1.43346e-06	1.96146e-19	0.00532778
81.3	1.30401e-06	1.4472e-19	0.00528944
81.4	1.18576e-06	1.06658e-19	0.00525141
81.5	1.0778e-06	7.85184e-20	0.0052137
81.6	9.79269e-07	5.77379e-20	0.0051763
81.7	8.89382e-07	4.24096e-20	0.00513921
81.8	8.07416e-07	3.11157e-20	0.00510242
81.9	7.32706e-07	2.28039e-20	0.00506593
82	6.64637e-07	1.66936e-20	0.00502975
82.1	6.02646e-07	1.22069e-20	0.00499386
82.2	5.46214e-07	8.91605e-21	0.00495826
82.3	4.94865e-07	6.50509e-21	0.00492295
82.4	4.4816e-07	4.74074e-21	0.00488793
82.5	4.05698e-07	3.45106e-21	0.0048532
82.6	3.67109e-07	2.50941e-21	0.00481875
82.7	3.32055e-07	1.82265e-21	0.00478458
82.8	3.00226e-07	1.32236e-21	0.00475069
82.9	2.71337e-07	9.58312e-22	0.00471708
83	2.45128e-07	6.93709e-22	0.00468374
83.1	2.21361e-07	5.01604e-22	0.00465067
83.2	1.99816e-07	3.62291e-22	0.00461786
83.3	1.80295e-07	2.61377e-22	0.00458533
83.4	1.62614e-07	1.88361e-22	0.00455305
83.5	1.46608e-07	1.35589e-22	0.00452104
83.6	1.32123e-07	9.74931e-23	0.00448928
83.7	1.19021e-07	7.00221e-23	0.00445779
83.8	1.07174e-07	5.02353e-23	0.00442654
83.9	9.64671e-08	3.59995e-23	0.00439555
84	8.67945e-08	2.57689e-23	0.00436481
84.1	7.80599e-08	1.84251e-23	0.00433431
84.2	7.01757e-08	1.31594e-23	0.00430406
84.3	6.30621e-08	9.38801e-24	0.00427405
84.4	5.66465e-08	6.68999e-24	0.00424428
84.5	5.08628e-08	4.762e-24	0.00421475
84.6	4.5651e-08	3.38585e-24	0.00418546
84.7	4.09566e-08	2.40468e-24	0.0041564
84.8	3.67299e-08	1.70593e-24	0.00412757
84.9	3.2926e-08	1.20886e-24	0.00409897
85	2.9504e-08	8.5567e-25	0.0040706
85.1	2.64269e-08	6.0499e-25	0.00404246
85.2	2.3661e-08	4.27271e-25	0.00401454
85.3	2.1176e-08	3.01419e-25	0.00398684
85.4	1.89442e-08	2.12399e-25	0.00395936
85.5	1.69408e-08	1.49502e-25	0.0039321
85.6	1.5143e-08	1.05112e-25	0.00390506
85.7	1.35305e-08	7.38196e-26	0.00387823
85.8	1.20848e-08	5.1785e-26	0.00385161
85.9	1.07892e-08	3.62869e-26	0.0038252
86	9.62851e-09	2.53985e-26	0.003799
86.1	8.5892e-09	1.77574e-26	0.00377301
86.2	7.65896e-09	1.24012e-26	0.00374722
86.3	6.82667e-09	8.65088e-27	0.00372164
86.4	6.08235e-09	6.02796e-27	0.00369626
86.5	5.41698e-09	4.19559e-27	0.00367107
86.6	4.82242e-09	2.91695e-27	0.00364609
86.7	4.29137e-09	2.02571e-27	0.0036213
86.8	3.81725e-09	1.4052e-27	0.0035967
86.9	3.39412e-09	9.73674e-28	0.0035723
87	3.01667e-09	6.73909e-28	0.00354808
87.1	2.68009e-09	4.65909e-28	0.00352406
87.2	2.3801e-09	3.21747e-28	0.00350022
87.3	2.11283e-09	2.21943e-28	0.00347657
87.4	1.8748e-09	1.52925e-28	0.0034531
87.5	1.66292e-09	1.05252e-28	0.00342982
87.6	1.47437e-09	7.23597e-29	0.00340672
87.7	1.30667e-09	4.96906e-29	0.00338379
87.8	1.15758e-09	3.40852e-29	0.00336105
87.9	1.02508e-09	2.33544e-29	0.00333848
88	9.07372e-10	1.5984e-29	0.00331608
88.1	8.02855e-10	1.09274e-29	0.00329386
88.2	7.10087e-10	7.46204e-30	0.00327181
88.3	6.27783e-10	5.08994e-30	0.00324993
88.4	5.54791e-10	3.46802e-30	0.00322822
88.5	4.90087e-10	2.36027e-30	0.00320668
88.6	4.32752e-10	1.60456e-30	0.0031853
88.7	3.81969e-10	1.08959e-30	0.00316409
88.8	3.37008e-10	7.39066e-31	0.00314304
88.9	2.97218e-10	5.00744e-31	0.00312215
89	2.62019e-10	3.38892e-31	0.00310142
89.1	2.30895e-10	2.29098e-31	0.00308085
89.2	2.03384e-10	1.54701e-31	0.00306044
89.3	1.79079e-10	1.04346e-31	0.00304019
89.4	1.57614e-10	7.0303e-32	0.00302009
89.5	1.38665e-10	4.73134e-32	0.00300014
89.6	1.21944e-10	3.18059e-32	0.00298034
89.7	1.07196e-10	2.13572e-32	0.0029607
89.8	9.41933e-11	1.43249e-32	0.0029412
89.9	8.2734e-11	9.59742e-33	0.00292185
90	7.26392e-11	6.42287e-33	0.00290265
90.1	6.375e-11	4.29356e-33	0.0028836
90.2	5.59259e-11	2.86694e-33	0.00286469
90.3	4.9042e-11	1.91219e-33	0.00284592
90.4	4.2988e-11	1.27397e-33	0.0028273
90.5	3.76659e-11	8.47808e-34	0.00280881
90.6	3.29893e-11	5.63573e-34	0.00279047
90.7	2.88815e-11	3.7421e-34	0.00277226
90.8	2.52749e-11	2.48195e-34	0.0027542
90.9	2.21097e-11	1.64431e-34	0.00273626
91	1.9333e-11	1.08815e-34	0.00271846
91.1	1.68981e-11	7.19292e-35	0.0027008
91.2	1.47638e-11	4.74936e-35	0.00268327
91.3	1.28939e-11	3.13241e-35	0.00266587
91.4	1.12562e-11	2.06364e-35	0.0026486
91.5	9.82247e-12	1.35801e-35	0.00263146
91.6	8.56789e-12	8.92656e-36	0.00261445
91.7	7.4705e-12	5.86109e-36	0.00259756
91.8	6.51102e-12	3.84402e-36	0.0025808
91.9	5.67245e-12	2.51829e-36	0.00256417
92	4.93987e-12	1.64793e-36	0.00254766
92.1	4.30015e-12	1.07717e-36	0.00253127
92.2	3.74174e-12	7.03306e-37	0.00251501
92.3	3.25452e-12	4.58687e-37	0.00249886
92.4	2.82959e-12	2.98814e-37	0.00248284
92.5	2.45914e-12	1.94446e-37	0.00246693
92.6	2.13631e-12	1.26389e-37	0.00245115
92.7	1.85511e-12	8.20603e-38	0.00243548
92.8	1.61027e-12	5.32194e-38	0.00241992
92.9	1.39717e-12	3.44762e-38	0.00240448
93	1.21178e-12	2.23091e-38	0.00238915
93.1	1.05056e-12	1.44197e-38	0.00237394
93.2	9.10414e-13	9.3099e-39	0.00235884
93.3	7.88645e-13	6.00407e-39	0.00234385
93.4	6.82884e-13	3.86776e-39	0.00232897
93.5	5.91065e-13	2.48878e-39	0.0023142
93.6	5.11383e-13	1.59966e-39	0.00229954
93.7	4.42262e-13	1.02702e-39	0.00228498
93.8	3.82329e-13	6.58635e-40	0.00227053
93.9	3.30382e-13	4.21914e-40	0.00225619
94	2.85377e-13	2.6997e-40	0.00224195
94.1	2.46403e-13	1.72552e-40	0.00222782
94.2	2.12664e-13	1.10163e-40	0.00221379
94.3	1.8347e-13	7.02533e-41	0.00219986
94.4	1.58219e-13	4.47518e-41	0.00218604
94.5	1.36388e-13	2.84752e-41	0.00217231
94.6	1.17521e-13	1.80982e-41	0.00215868
94.7	1.01223e-13	1.14899e-41	0.00214516
94.8	8.71497e-14	7.28638e-42	0.00213173
94.9	7.50023e-14	4.61551e-42	0.00211839
95	6.45218e-14	2.92039e-42	0.00210516
95.1	5.54831e-14	1.84575e-42	0.00209202
95.2	4.76912e-14	1.16525e-42	0.00207897
95.3	4.09769e-14	7.34818e-43	0.00206602
95.4	3.51935e-14	4.62862e-43	0.00205317
95.5	3.0214e-14	2.91231e-43	0.0020404
95.6	2.59285e-14	1.83035e-43	0.00202773
95.7	2.22418e-14	1.14907e-43	0.00201515
95.8	1.90715e-14	7.2056e-44	0.00200266
95.9	1.63464e-14	4.51343e-44	0.00199026
96	1.4005e-14	2.82395e-44	0.00197794
96.1	1.19941e-14	1.7649e-44	0.00196572
96.2	1.02677e-14	1.10178e-44	0.00195358
96.3	8.78623e-15	6.87043e-45	0.00194153
96.4	7.51544e-15	4.27942e-45	0.00192957
96.5	6.42584e-15	2.66256e-45	0.00191769
96.6	5.49197e-15	1.65473e-45	0.0019059
96.7	4.6919e-15	1.02723e-45	0.00189419
96.8	4.00676e-15	6.36972e-46	0.00188256
96.9	3.42026e-15	3.94536e-46	0.00187102
97	2.91843e-15	2.44098e-46	0.00185956
97.1	2.48921e-15	1.50854e-46	0.00184818
97.2	2.12225e-15	9.3124e-47	0.00183688
97.3	1.80865e-15	5.74221e-47	0.00182566
97.4	1.54077e-15	3.5368e-47	0.00181452
97.5	1.31202e-15	2.17597e-47	0.00180346
97.6	1.11678e-15	1.33724e-47	0.00179247
97.7	9.50207e-16	8.20879e-48	0.00178157
97.8	8.08148e-16	5.0334e-48	0.00177074
97.9	6.87048e-16	3.08288e-48	0.00175999
98	5.83856e-16	1.8861e-48	0.00174931
98.1	4.9596e-16	1.15262e-48	0.00173871
98.2	4.21125e-16	7.0359e-49	0.00172818
98.3	3.57436e-16	4.29009e-49	0.00171773
98.4	3.03256e-16	2.61292e-49	0.00170735
98.5	2.57183e-16	1.58964e-49	0.00169704
98.6	2.18021e-16	9.66016e-50	0.0016868
98.7	1.84747e-16	5.86385e-50	0.00167664
98.8	1.56487e-16	3.55545e-50	0.00166655
98.9	1.32496e-16	2.15337e-50	0.00165653
99	1.12138e-16	1.30273e-50	0.00164657
99.1	9.48685e-17	7.87238e-51	0.00163669
99.2	8.02261e-17	4.75192e-51	0.00162688
99.3	6.78159e-17	2.86514e-51	0.00161713
99.4	5.73022e-17	1.72558e-51	0.00160745
99.5	4.83986e-17	1.03809e-51	0.00159784
99.6	4.08619e-17	6.23808e-52	0.0015883
99.7	3.44847e-17	3.74437e-52	0.00157882
99.8	2.90909e-17	2.24501e-52	0.00156941
99.9	2.45307e-17	1.34454e-52	0.00156006
100	2.0677e-17	8.04338e-53	0.00155078
100.1	1.74216e-17	4.80638e-53	0.00154156
100.2	1.46727e-17	2.86887e-53
100.3	1.23525e-17	1.71047e-53
100.4	1.0395e-17	1.01867e-53
100.5	8.74408e-18	6.05988e-54
100.6	7.35238e-18	3.60088e-54
100.7	6.17966e-18	2.1373e-54
100.8	5.19188e-18	1.26717e-54
100.9	4.36021e-18	7.50442e-55
101	3.66027e-18	4.43928e-55
101.1	3.07144e-18	2.62314e-55
101.2	2.57628e-18	1.54826e-55
101.3	2.16007e-18	9.12803e-56
101.4	1.81036e-18	5.37557e-56
101.5	1.51665e-18	3.16216e-56
101.6	1.27007e-18	1.85805e-56
101.7	1.06315e-18	1.09054e-56
101.8	8.89574e-19	6.39355e-57
101.9	7.44036e-19	3.74416e-57
102	6.22054e-19	2.19017e-57
102.1	5.19859e-19	1.27972e-57
102.2	4.34276e-19	7.46907e-58
102.3	3.62635e-19	4.35442e-58
102.4	3.02688e-19	2.53575e-58
102.5	2.52549e-19	1.47501e-58
102.6	2.10628e-19	8.57034e-59
102.7	1.75595e-19	4.97408e-59
102.8	1.46329e-19	2.88364e-59
102.9	1.21891e-19	1.66987e-59
103	1.01492e-19	9.65908e-60
103.1	8.44734e-20	5.58088e-60
103.2	7.02796e-20	3.22094e-60
103.3	5.84469e-20	1.85684e-60
103.4	4.85867e-20	1.06925e-60
103.5	4.03734e-20	6.15033e-61
103.6	3.35348e-20	3.5337e-61
103.7	2.78432e-20	2.02803e-61
103.8	2.31082e-20	1.1626e-61
103.9	1.91706e-20	6.65735e-62
104	1.58975e-20	3.80789e-62
104.1	1.31778e-20	2.17561e-62
104.2	1.0919e-20	1.24162e-62
104.3	9.04365e-21	7.07801e-63
104.4	7.48735e-21	4.03038e-63
104.5	6.19634e-21	2.29241e-63
104.6	5.12584e-21	1.30243e-63
104.7	4.23855e-21	7.39141e-64
104.8	3.50343e-21	4.18999e-64
104.9	2.89462e-21	2.37253e-64
105	2.39064e-21	1.34191e-64
105.1	1.9736e-21	7.58141e-65
105.2	1.62864e-21	4.27846e-65
105.3	1.34343e-21	2.41179e-65
105.4	1.10772e-21	1.35801e-65
105.5	9.12988e-22	7.63799e-66
105.6	7.52183e-22	4.2911e-66
105.7	6.19449e-22	2.40808e-66
105.8	5.0993e-22	1.34985e-66
105.9	4.19602e-22	7.55814e-67
106	3.45135e-22	4.22724e-67
106.1	2.83767e-22	2.36162e-67
106.2	2.33216e-22	1.31789e-67
106.3	1.91592e-22	7.34612e-68
106.4	1.57333e-22	4.09026e-68
106.5	1.29147e-22	2.27487e-68
106.6	1.05967e-22	1.26379e-68
106.7	8.69127e-23	7.01305e-69
106.8	7.12553e-23	3.88733e-69
106.9	5.83947e-23	2.15233e-69
107	4.78358e-23	1.19036e-69
107.1	3.91702e-23	6.57602e-70
107.2	3.20613e-23	3.62877e-70
107.3	2.62318e-23	2.00018e-70
107.4	2.14536e-23	1.10126e-70
107.5	1.75386e-23	6.05655e-71
107.6	1.43321e-23	3.32716e-71
107.7	1.17071e-23	1.82572e-71
107.8	9.55902e-24	1.00071e-71
107.9	7.80187e-24	5.47892e-72
108	6.36513e-24	2.99636e-72
108.1	5.19085e-24	1.63684e-72
108.2	4.23149e-24	8.93166e-73
108.3	3.44802e-24	4.86823e-73
108.4	2.80847e-24	2.65046e-73
108.5	2.28662e-24	1.44141e-73
108.6	1.86097e-24	7.83003e-74
108.7	1.51394e-24	4.24867e-74
108.8	1.23112e-24	2.3028e-74
108.9	1.00072e-24	1.24673e-74
109	8.13114e-25	6.74219e-75
109.1	6.60407e-25	3.64202e-75
109.2	5.36161e-25	1.96516e-75
109.3	4.35112e-25	1.05917e-75
109.4	3.52964e-25	5.70223e-76
109.5	2.86208e-25	3.06647e-76
109.6	2.31984e-25	1.64719e-76
109.7	1.87955e-25	8.83819e-77
109.8	1.52221e-25	4.73692e-77
109.9	1.23231e-25	2.53595e-77
110	9.97208e-26	1.35612e-77
110.1	8.06631e-26	7.24385e-78
110.2	6.5221e-26	3.86503e-78
110.3	5.27136e-26	2.05992e-78
110.4	4.25873e-26	1.09663e-78
110.5	3.43923e-26	5.83152e-79
110.6	2.77629e-26	3.09754e-79
110.7	2.24023e-26	1.64348e-79
110.8	1.80693e-26	8.71017e-80
110.9	1.45685e-26	4.61106e-80
111	1.17411e-26	2.4383e-80
111.1	9.45862e-27	1.28792e-80
111.2	7.61674e-27	6.79517e-81
111.3	6.13102e-27	3.58118e-81
111.4	4.9331e-27	1.88523e-81
111.5	3.96762e-27	9.91326e-82
111.6	3.1898e-27	5.20692e-82
111.7	2.56341e-27	2.73186e-82
111.8	2.05919e-27	1.43169e-82
111.9	1.65348e-27	7.49467e-83
112	1.32716e-27	3.91894e-83
112.1	1.06481e-27	2.0469e-83
112.2	8.53966e-28	1.06792e-83
112.3	6.84595e-28	5.56538e-84
112.4	5.48592e-28	2.89709e-84
112.5	4.39429e-28	1.50641e-84
112.6	3.51844e-28	7.82414e-85
112.7	2.81602e-28	4.05923e-85
112.8	2.2529e-28	2.1036e-85
112.9	1.80166e-28	1.08892e-85
113	1.44021e-28	5.63042e-86
113.1	1.15081e-28	2.90803e-86
113.2	9.19183e-29	1.50027e-86
113.3	7.33878e-29	7.73133e-87
113.4	5.85692e-29	3.97971e-87
113.5	4.67237e-29	2.04626e-87
113.6	3.72587e-29	1.05095e-87
113.7	2.9699e-29	5.39163e-88
113.8	2.36634e-29	2.76292e-88
113.9	1.88468e-29	1.41426e-88
114	1.50044e-29	7.2311e-89
114.1	1.19406e-29	3.69311e-89
114.2	9.49846e-30	1.88405e-89
114.3	7.55273e-30	9.60076e-90
114.4	6.00314e-30	4.88688e-90
114.5	4.76952e-30	2.48468e-90
114.6	3.78787e-30	1.26189e-90
114.7	3.00703e-30	6.40159e-91
114.8	2.38618e-30	3.24389e-91
114.9	1.89274e-30	1.64194e-91
115	1.50073e-30	8.30156e-92
115.1	1.18943e-30	4.19253e-92
115.2	9.42311e-31	2.11498e-92
115.3	7.46233e-31	1.06573e-92
115.4	5.90714e-31	5.36418e-93
115.5	4.67415e-31	2.69694e-93
115.6	3.69702e-31	1.35442e-93
115.7	2.92296e-31	6.79434e-94
115.8	2.31003e-31	3.4045e-94
115.9	1.82488e-31	1.70402e-94
116	1.44104e-31	8.51935e-95
116.1	1.13747e-31	4.25454e-95
116.2	8.97481e-32	2.12232e-95
116.3	7.07838e-32	1.05751e-95
116.4	5.58041e-32	5.26341e-96
116.5	4.39765e-32	2.61676e-96
116.6	3.46417e-32	1.2995e-96
116.7	2.72772e-32	6.44611e-97
116.8	2.14695e-32	3.19399e-97
116.9	1.68915e-32	1.58082e-97
117	1.32843e-32	7.81529e-98
117.1	1.04431e-32	3.8594e-98
117.2	8.20627e-33	1.90374e-98
117.3	6.4459e-33	9.38012e-99
117.4	5.0611e-33	4.6166e-99
117.5	3.97218e-33	2.2696e-99
117.6	3.11627e-33	1.11452e-99
117.7	2.4438e-33	5.46689e-100
117.8	1.91566e-33	2.67859e-100
117.9	1.50104e-33	1.31094e-100
118	1.17569e-33	6.40877e-101
118.1	9.20475e-34	3.12953e-101
118.2	7.20371e-34	1.5265e-101
118.3	5.63538e-34	7.43747e-102
118.4	4.4067e-34	3.61966e-102
118.5	3.4445e-34	1.75964e-102
118.6	2.6913e-34	8.54462e-103
118.7	2.10194e-34	4.14452e-103
118.8	1.64097e-34	2.00802e-103
118.9	1.28058e-34	9.71798e-104
119	9.98926e-35	4.69782e-104
119.1	7.78903e-35	2.26845e-104
119.2	6.07095e-35	1.09415e-104
119.3	4.72991e-35	5.2715e-105
119.4	3.68359e-35	2.53692e-105
119.5	2.86756e-35	1.21953e-105
119.6	2.2314e-35	5.85583e-106
119.7	1.73566e-35	2.80866e-106
119.8	1.34951e-35	1.34562e-106
119.9	1.04884e-35	6.43961e-107
120	8.14827e-36	3.07829e-107
120.1	6.32768e-36	1.46984e-107
120.2	4.91187e-36	7.01046e-108
120.3	3.81129e-36	3.33991e-108
120.4	2.9561e-36	1.58941e-108
120.5	2.29187e-36	7.55526e-109
120.6	1.77617e-36	3.58737e-109
120.7	1.37594e-36	1.70144e-109
120.8	1.06547e-36	8.06063e-110
120.9	8.24712e-37	3.81447e-110
121	6.38098e-37	1.80307e-110
121.1	4.9351e-37	8.51343e-111
121.2	3.81528e-37	4.01522e-111
121.3	2.94836e-37	1.89159e-111
121.4	2.2775e-37	8.90136e-112
121.5	1.75856e-37	4.18408e-112
121.6	1.35731e-37	1.96452e-112
121.7	1.04719e-37	9.2135e-113
121.8	8.07595e-38	4.31625e-113
121.9	6.22566e-38	2.01977e-113
122	4.79733e-38	9.4408e-114
122.1	3.69519e-38	4.40788e-114
122.2	2.84509e-38	2.05572e-114
122.3	2.18967e-38	9.57656e-115
122.4	1.68456e-38	4.45624e-115
122.5	1.29543e-38	2.07129e-115
122.6	9.95785e-39	9.61671e-116
122.7	7.65138e-39	4.45989e-116
122.8	5.87675e-39	2.06602e-116
122.9	4.51188e-39	9.56003e-117
123	3.46259e-39	4.41872e-117
123.1	2.65624e-39	2.04007e-117
123.2	2.03684e-39	9.40825e-118
123.3	1.56123e-39	4.33395e-118
123.4	1.1962e-39	1.99422e-118
123.5	9.16137e-40	9.16588e-119
123.6	7.0136e-40	4.20813e-119
123.7	5.36716e-40	1.92982e-119
123.8	4.10555e-40	8.84008e-120
123.9	3.13921e-40	4.04491e-120
124	2.39934e-40	1.84874e-120
124.1	1.83311e-40	8.44023e-121
124.2	1.39993e-40	3.84898e-121
124.3	1.06868e-40	1.75328e-121
124.4	8.15474e-41	7.97753e-122
124.5	6.22009e-41	3.62576e-122
124.6	4.74249e-41	1.64605e-122
124.7	3.61442e-41	7.46447e-123
124.8	2.75356e-41	3.38118e-123
124.9	2.09687e-41	1.52986e-123
125	1.59615e-41	6.91426e-124
125.1	1.2145e-41	3.12143e-124
125.2	9.23729e-42	1.40758e-124
125.3	7.02287e-42	6.34028e-125
125.4	5.33712e-42	2.85269e-125
125.5	4.05437e-42	1.28208e-125
125.6	3.07866e-42	5.75556e-126
125.7	2.33681e-42	2.58091e-126
125.8	1.77299e-42	1.15604e-126
125.9	1.34467e-42	5.17229e-127
126	1.0194e-42	2.31157e-127
126.1	7.72499e-43	1.03192e-127
126.2	5.85159e-43	4.60145e-128
126.3	4.4307e-43	2.04955e-128
126.4	3.35347e-43	9.11872e-129
126.5	2.53711e-43	4.0525e-129
126.6	1.9187e-43	1.79897e-129
126.7	1.45043e-43	7.97699e-130
126.8	1.096e-43	3.53319e-130
126.9	8.2784e-44	1.56317e-130
127	6.25037e-44	6.90813e-131
127.1	4.71724e-44	3.04949e-131
127.2	3.55871e-44	1.34464e-131
127.3	2.68362e-44	5.92241e-132
127.4	2.02288e-44	2.60558e-132
127.5	1.52421e-44	1.14504e-132
127.6	1.148e-44	5.02635e-133
127.7	8.64292e-45	2.20392e-133
127.8	6.50434e-45	9.6528e-134
127.9	4.89292e-45	4.22302e-134
128	3.67923e-45	1.84546e-134
128.1	2.76546e-45	8.05566e-135
128.2	2.07779e-45	3.51244e-135
128.3	1.56048e-45	1.52979e-135
128.4	1.17149e-45	6.65526e-136
128.5	8.79104e-46	2.89209e-136
128.6	6.59426e-46	1.25537e-136
128.7	4.94441e-46	5.44309e-137
128.8	3.70583e-46	2.35739e-137
128.9	2.77639e-46	1.01984e-137
129	2.0792e-46	4.40699e-138
129.1	1.55646e-46	1.90225e-138
129.2	1.16466e-46	8.20171e-139
129.3	8.71135e-47	3.53228e-139
129.4	6.5132e-47	1.51956e-139
129.5	4.86772e-47	6.52972e-140
129.6	3.63647e-47	2.80275e-140
129.7	2.71555e-47	1.20167e-140
129.8	2.02702e-47	5.14637e-141
129.9	1.51245e-47	2.20155e-141
130	1.12805e-47	9.4074e-142
130.1	8.41e-48	4.01535e-142
130.2	6.26741e-48	1.71195e-142
130.3	4.66877e-48	7.29071e-143
130.4	3.47649e-48	3.10143e-143
130.5	2.58762e-48	1.31786e-143
130.6	1.92524e-48	5.59354e-144
130.7	1.43183e-48	2.37147e-144
130.8	1.06444e-48	1.0043e-144
130.9	7.90993e-49	4.24834e-145
131	5.87554e-49	1.7951e-145
131.1	4.3626e-49	7.57656e-146
131.2	3.23792e-49	3.19424e-146
131.3	2.4022e-49	1.34517e-146
131.4	1.78146e-49	5.65846e-147
131.5	1.32058e-49	2.37757e-147
131.6	9.7854e-50	9.97886e-148
131.7	7.24793e-50	4.18351e-148
131.8	5.36627e-50	1.75192e-148
131.9	3.97149e-50	7.32826e-149
132	2.93804e-50	3.06196e-149
132.1	2.17262e-50	1.27795e-149
132.2	1.60596e-50	5.32767e-150
132.3	1.18661e-50	2.21858e-150
132.4	8.764e-51	9.22839e-151
132.5	6.47025e-51	3.83433e-151
132.6	4.77488e-51	1.59135e-151
132.7	3.5223e-51	6.59715e-152
132.8	2.59725e-51	2.73186e-152
132.9	1.91436e-51	1.12999e-152
133	1.41045e-51	4.66877e-153
133.1	1.03876e-51	1.92683e-153
133.2	7.64702e-52	7.94324e-154
133.3	5.62722e-52	3.27088e-154
133.4	4.13922e-52	1.34538e-154
133.5	3.04345e-52	5.52762e-155
133.6	2.23685e-52	2.26853e-155
133.7	1.64335e-52	9.29956e-156
133.8	1.20683e-52	3.80798e-156
133.9	8.859e-53	1.55754e-156
134	6.5005e-53	6.3635e-157
134.1	4.76795e-53	2.59697e-157
134.2	3.49574e-53	1.05864e-157
134.3	2.56195e-53	4.31069e-158
134.4	1.87683e-53	1.7533e-158
134.5	1.37436e-53	7.12324e-159
134.6	1.006e-53	2.89076e-159
134.7	7.36075e-54	1.17182e-159
134.8	5.38353e-54	4.74484e-160
134.9	3.93582e-54	1.91909e-160
135	2.87625e-54	7.75321e-161
135.1	2.10107e-54	3.12883e-161
135.2	1.53418e-54	1.26123e-161
135.3	1.11979e-54	5.07831e-162
135.4	8.16995e-55	2.04248e-162
135.5	5.95833e-55	8.20557e-163
135.6	4.34363e-55	3.29286e-163
135.7	3.16522e-55	1.31993e-163
135.8	2.30557e-55	5.28494e-164
135.9	1.67871e-55	2.1137e-164
136	1.22179e-55	8.4442e-165
136.1	8.8887e-56	3.36967e-165
136.2	6.46404e-56	1.34316e-165
136.3	4.69886e-56	5.3479e-166
136.4	3.41432e-56	2.12692e-166
136.5	2.47993e-56	8.44951e-167
136.6	1.80051e-56	3.35293e-167
136.7	1.3067e-56	1.32902e-167
136.8	9.47937e-57	5.26199e-168
136.9	6.87394e-57	2.08105e-168
137	4.98258e-57	8.22105e-169
137.1	3.61016e-57	3.24403e-169
137.2	2.6147e-57	1.27866e-169
137.3	1.89295e-57	5.0343e-170
137.4	1.36987e-57	1.97987e-170
137.5	9.9093e-58	7.7776e-171
137.6	7.16521e-58	3.05188e-171
137.7	5.17891e-58	1.1962e-171
137.8	3.74171e-58	4.6833e-172
137.9	2.70225e-58	1.83153e-172
138	1.95076e-58	7.15463e-173
138.1	1.40768e-58	2.79173e-173
138.2	1.01538e-58	1.08811e-173
138.3	7.32107e-59	4.2363e-174
138.4	5.27648e-59	1.64745e-174
138.5	3.80134e-59	6.39958e-175
138.6	2.73749e-59	2.48315e-175
138.7	1.97056e-59	9.62426e-176
138.8	1.41792e-59	3.72602e-176
138.9	1.01985e-59	1.4409e-176
139	7.33233e-60	5.56594e-177
139.1	5.26953e-60	2.14761e-177
139.2	3.78551e-60	8.2772e-178
139.3	2.71832e-60	3.18659e-178
139.4	1.95119e-60	1.22541e-178
139.5	1.39997e-60	4.70705e-179
139.6	1.00407e-60	1.80605e-179
139.7	7.19833e-61	6.92186e-180
139.8	5.15848e-61	2.6499e-180
139.9	3.69517e-61	1.01333e-180
140	2.64588e-61	3.87063e-181
140.1	1.89378e-61	1.47682e-181
140.2	1.35491e-61	5.6284e-182
140.3	9.68982e-62	2.14267e-182
140.4	6.92697e-62	8.1478e-183
140.5	4.94987e-62	3.09483e-183
140.6	3.53563e-62	1.17421e-183
140.7	2.52443e-62	4.4501e-184
140.8	1.8017e-62	1.68463e-184
140.9	1.28536e-62	6.37022e-185
141	9.16619e-63	2.40611e-185
141.1	6.53397e-63	9.078e-186
141.2	4.65573e-63	3.42119e-186
141.3	3.31605e-63	1.28789e-186
141.4	2.3609e-63	4.84274e-187
141.5	1.68018e-63	1.81894e-187
141.6	1.19525e-63	6.82427e-188
141.7	8.49932e-64	2.55746e-188
141.8	6.04133e-64	9.57355e-189
141.9	4.29243e-64	3.57974e-189
142	3.04858e-64	1.33703e-189
142.1	2.16428e-64	4.98822e-190
142.2	1.53587e-64	1.85893e-190
142.3	1.08947e-64	6.91976e-191
142.4	7.72506e-65	2.57296e-191
142.5	5.47533e-65	9.55628e-192
142.6	3.87919e-65	3.54533e-192
142.7	2.74723e-65	1.31383e-192
142.8	1.94479e-65	4.86331e-193
142.9	1.37617e-65	1.79821e-193
143	9.73409e-66	6.64139e-194
143.1	6.88242e-66	2.45015e-194
143.2	4.86418e-66	9.02896e-195
143.3	3.43638e-66	3.3235e-195
143.4	2.4267e-66	1.22199e-195
143.5	1.71298e-66	4.48799e-196
143.6	1.20868e-66	1.64645e-196
143.7	8.52504e-67	6.03337e-197
143.8	6.01038e-67	2.20843e-197
143.9	4.23576e-67	8.07456e-198
144	2.98389e-67	2.94895e-198
144.1	2.10115e-67	1.0758e-198
144.2	1.47896e-67	3.92017e-199
144.3	1.04058e-67	1.4269e-199
144.4	7.31845e-68	5.18792e-200
144.5	5.145e-68	1.88411e-200
144.6	3.61555e-68	6.83492e-201
144.7	2.53973e-68	2.4767e-201
144.8	1.78329e-68	8.96448e-202
144.9	1.25164e-68	3.24108e-202
145	8.78134e-69	1.17049e-202
145.1	6.15835e-69	4.2224e-203
145.2	4.31709e-69	1.52147e-203
145.3	3.0251e-69	5.47622e-204
145.4	2.11891e-69	1.96884e-204
145.5	1.48357e-69	7.07055e-205
145.6	1.03831e-69	2.53635e-205
145.7	7.26386e-70	9.08819e-206
145.8	5.07962e-70	3.25281e-206
145.9	3.55073e-70	1.16293e-206
146	2.48101e-70	4.15299e-207
146.1	1.73285e-70	1.48143e-207
146.2	1.20981e-70	5.27854e-208
146.3	8.44296e-71	1.87871e-208
146.4	5.88974e-71	6.67911e-209
146.5	4.10696e-71	2.37187e-209
146.6	2.86265e-71	8.41348e-210
146.7	1.99452e-71	2.98108e-210
146.8	1.38909e-71	1.05508e-210
146.9	9.67045e-72	3.72999e-211
147	6.72954e-72	1.31718e-211
147.1	4.68109e-72	4.64615e-212
147.2	3.25485e-72	1.63703e-212
147.3	2.26224e-72	5.76144e-213
147.4	1.5717e-72	2.02544e-213
147.5	1.0915e-72	7.11246e-214
147.6	7.57703e-73	2.49479e-214
147.7	5.25772e-73	8.74099e-215
147.8	3.64687e-73	3.05915e-215
147.9	2.52851e-73	1.06943e-215
148	1.7524e-73	3.73438e-216
148.1	1.21401e-73	1.30256e-216
148.2	8.40691e-74	4.53826e-217
148.3	5.81933e-74	1.5794e-217
148.4	4.02654e-74	5.49048e-218
148.5	2.78493e-74	1.90652e-218
148.6	1.92539e-74	6.61278e-219
148.7	1.3306e-74	2.29108e-219
148.8	9.19176e-75	7.92882e-220
148.9	6.34706e-75	2.74088e-220
149	4.38096e-75	9.46423e-221
149.1	3.02266e-75	3.26432e-221
149.2	2.08464e-75	1.12464e-221
149.3	1.43713e-75	3.87032e-222
149.4	9.90342e-76	1.33043e-222
149.5	6.82176e-76	4.56828e-223
149.6	4.69711e-76	1.56684e-223
149.7	3.23286e-76	5.36797e-224
149.8	2.22417e-76	1.837e-224
149.9	1.52957e-76	6.27942e-225
150	1.05147e-76	2.14409e-225
150.1	7.22511e-77	7.31274e-226
150.2	4.96268e-77	2.49132e-226
150.3	3.4073e-77	8.47799e-227
150.4	2.33845e-77	2.88183e-227
150.5	1.60423e-77	9.78491e-228
150.6	1.1001e-77	3.31862e-228
150.7	7.54079e-78	1.12427e-228
150.8	5.16685e-78	3.80452e-229
150.9	3.53881e-78	1.286e-229
151	2.42277e-78	4.34203e-230
151.1	1.65802e-78	1.4644e-230
151.2	1.1342e-78	4.9333e-231
151.3	7.75557e-79	1.66008e-231
151.4	5.30103e-79	5.58e-232
151.5	3.62184e-79	1.87349e-232
151.6	2.47355e-79	6.28322e-233
151.7	1.68864e-79	2.10487e-233
151.8	1.15232e-79	7.0434e-234
151.9	7.86023e-80	2.35425e-234
152	5.35943e-80	7.86021e-235
152.1	3.6528e-80	2.62137e-235
152.2	2.4886e-80	8.73247e-236
152.3	1.69476e-80	2.90575e-236
152.4	1.15367e-80	9.65811e-237
152.5	7.8502e-81	3.20656e-237
152.6	5.33951e-81	1.0634e-237
152.7	3.63033e-81	3.52266e-238
152.8	2.46725e-81	1.16562e-238
152.9	1.67611e-81	3.85261e-239
153	1.13819e-81	1.27194e-239
153.1	7.72592e-82	4.1946e-240
153.2	5.24214e-82	1.38174e-240
153.3	3.55541e-82	4.54651e-241
153.4	2.41043e-82	1.49431e-241
153.5	1.63351e-82	4.90588e-242
153.6	1.10655e-82	1.60881e-242
153.7	7.49281e-83	5.26996e-243
153.8	5.07155e-83	1.72434e-243
153.9	3.4313e-83	5.63573e-244
154	2.3206e-83	1.83988e-244
154.1	1.56879e-83	5.9999e-245
154.2	1.06011e-83	1.95439e-245
154.3	7.16083e-84	6.35901e-246
154.4	4.835e-84	2.06672e-246
154.5	3.26327e-84	6.70945e-247
154.6	2.20157e-84	2.17573e-247
154.7	1.48468e-84	7.04751e-248
154.8	1.00083e-84	2.28023e-248
154.9	6.74382e-85	7.36947e-249
155	4.54231e-85	2.37906e-249
155.1	3.05823e-85	7.67165e-250
155.2	2.0582e-85	2.47106e-250
155.3	1.38461e-85	7.95046e-251
155.4	9.31082e-86	2.55513e-251
155.5	6.25854e-86	8.20253e-252
155.6	4.20515e-86	2.63024e-252
155.7	2.82431e-86	8.42472e-253
155.8	1.89612e-86	2.69543e-253
155.9	1.27246e-86	8.61418e-254
156	8.53576e-87	2.74987e-254
156.1	5.72354e-87	8.76849e-255
156.2	3.83628e-87	2.79286e-255
156.3	2.57027e-87	8.8856e-256
156.4	1.72135e-87	2.82382e-256
156.5	1.15235e-87	8.96398e-257
156.6	7.71118e-88	2.84235e-257
156.7	5.15799e-88	9.00257e-258
156.8	3.44876e-88	2.84819e-258
156.9	2.30499e-88	9.00085e-259
157	1.53992e-88	2.84126e-259
157.1	1.02837e-88	8.95885e-260
157.2	6.86473e-89	2.82167e-260
157.3	4.58058e-89	8.87714e-261
157.4	3.05521e-89	2.78967e-261
157.5	2.03697e-89	8.75679e-262
157.6	1.35753e-89	2.74568e-262
157.7	9.04355e-90	8.59941e-263
157.8	6.02214e-90	2.6903e-263
157.9	4.00853e-90	8.40706e-264
158	2.66712e-90	2.62423e-264
158.1	1.77388e-90	8.18223e-265
158.2	1.17931e-90	2.54832e-265
158.3	7.83706e-91	7.92776e-266
158.4	5.20598e-91	2.46354e-266
158.5	3.4568e-91	7.64682e-267
158.6	2.2944e-91	2.37091e-267
158.7	1.52225e-91	7.34282e-268
158.8	1.00955e-91	2.27156e-268
158.9	6.69255e-92	7.01935e-269
159	4.43484e-92	2.16662e-269
159.1	2.93756e-92	6.68009e-270
159.2	1.945e-92	2.05728e-270
159.3	1.28729e-92	6.32877e-271
159.4	8.51634e-93	1.94472e-271
159.5	5.63189e-93	5.96909e-272
159.6	3.72287e-93	1.83009e-272
159.7	2.45994e-93	5.60465e-273
159.8	1.62478e-93	1.7145e-273
159.9	1.07272e-93	5.23891e-274
160	7.0795e-94	1.59903e-274
160.1	4.67026e-94	4.87511e-275
160.2	3.07966e-94	1.48466e-275
160.3	2.02996e-94	4.51627e-276
160.4	1.3375e-94	1.37229e-276
160.5	8.80895e-95	4.16511e-277
160.6	5.79932e-95	1.26276e-277
160.7	3.81639e-95	3.82407e-278
160.8	2.51045e-95	1.15676e-278
160.9	1.65072e-95	3.49523e-279
161	1.08497e-95	1.05492e-279
161.1	7.12828e-96	3.18037e-280
161.2	4.68139e-96	9.57742e-281
161.3	3.07318e-96	2.88092e-281
161.4	2.01662e-96	8.65622e-282
161.5	1.32277e-96	2.59799e-282
161.6	8.67292e-97	7.7886e-283
161.7	5.68421e-97	2.33235e-283
161.8	3.7239e-97	6.97657e-284
161.9	2.43864e-97	2.08451e-284
162	1.59633e-97	6.22124e-285
162.1	1.04452e-97	1.85466e-285
162.2	6.83184e-98	5.52285e-286
162.3	4.46663e-98	1.64276e-286
162.4	2.91907e-98	4.88091e-287
162.5	1.90692e-98	1.44857e-287
162.6	1.24521e-98	4.29428e-288
162.7	8.12789e-99	1.27161e-288
162.8	5.30316e-99	3.76124e-289
162.9	3.45871e-99	1.11127e-289
163	2.25484e-99	3.27963e-290
163.1	1.46941e-99	9.66808e-291
163.2	9.57172e-100	2.84688e-291
163.3	6.23248e-100	8.37356e-292
163.4	4.05654e-100	2.46017e-292
163.5	2.6392e-100	7.21992e-293
163.6	1.71637e-100	2.11647e-293
163.7	1.11577e-100	6.19735e-294
163.8	7.25038e-101	1.81264e-294
163.9	4.70944e-101	5.2958e-295
164	3.05774e-101	1.54548e-295
164.1	1.98452e-101	4.50514e-296
164.2	1.28746e-101	1.3118e-296
164.3	8.34896e-102	3.81537e-297
164.4	5.41197e-102	1.10846e-297
164.5	3.50672e-102	3.21675e-298
164.6	2.27128e-102	9.32452e-299
164.7	1.47049e-102	2.69991e-299
164.8	9.51648e-103	7.8088e-300
164.9	6.15622e-103	2.25597e-300
165	3.98084e-103	6.51019e-301
165.1	2.57311e-103	1.87658e-301
165.2	1.66251e-103	5.40325e-302
165.3	1.07373e-103	1.55401e-302
165.4	6.93179e-104	4.46445e-303
165.5	4.47322e-104	1.28113e-303
165.6	2.88548e-104	3.67225e-304
165.7	1.86054e-104	1.05144e-304
165.8	1.19917e-104	3.0071e-305
165.9	7.7259e-105	8.59064e-306
166	4.97552e-105	2.45141e-306
166.1	3.20295e-105	6.98746e-307
166.2	2.06104e-105	1.98946e-307
166.3	1.3257e-105	5.65802e-308
166.4	8.52364e-106	0
166.5	5.47809e-106	0
166.6	3.51929e-106	0
166.7	2.25998e-106	3.660242489781419e-310
166.8	1.4507e-106	1.035150518673314e-310
166.9	9.30837e-107	2.92422014732344e-311
167	5.97024e-107	8.251436103338465e-312
167.1	3.82766e-107	2.325744121985016e-312
167.2	2.453e-107	6.547978399666019e-313
167.3	1.57139e-107	1.841473439794643e-313
167.4	1.00622e-107	5.172929926873411e-314
167.5	6.44061e-108	1.451512053840305e-314
167.6	4.12082e-108	4.06834348701521e-315
167.7	2.63549e-108	1.139009888639778e-315
167.8	1.68486e-108	3.185299617297855e-316
167.9	1.07668e-108	8.897868825924534e-317
168	6.87757e-109	2.482759414921244e-317
168.1	4.39143e-109	6.919843910400832e-318
168.2	2.80284e-109	1.926505232172314e-318
168.3	1.78819e-109	5.357450237244141e-319
168.4	1.14039e-109	1.488175131838419e-319
168.5	7.26969e-110	4.129400667941139e-320
168.6	4.63234e-110	1.144256035768327e-320
168.7	2.95058e-110	3.16696078984239e-321
168.8	1.87862e-110	8.744961931390064e-322
168.9	1.19562e-110	2.420921664622108e-322
169	7.60621e-111	6.422853395936205e-323
169.1	4.83691e-111	1.976262583364986e-323
169.2	3.07461e-111	4.940656458412465e-324
169.3	1.9536e-111	0
169.4	1.2408e-111	0
169.5	7.8776e-112	0
169.6	4.99928e-112	0
169.7	3.17135e-112	0
169.8	2.01096e-112	0
169.9	1.27464e-112	0
170	8.07591e-113	0
170.1	5.1147e-113	0
170.2	3.23796e-113	0
170.3	2.04901e-113	0
170.4	1.29611e-113	0
170.5	8.19524e-114	0
170.6	5.1797e-114	0
170.7	3.27243e-114	0
170.8	2.06661e-114	0
170.9	1.30458e-114	0
171	8.23198e-115	0
171.1	5.19232e-115	0
171.2	3.27372e-115	0
171.3	2.06322e-115	0
171.4	1.29978e-115	0
171.5	8.18502e-116	0
171.6	5.15218e-116	0
171.7	3.2418e-116	0
171.8	2.03893e-116	0
171.9	1.28187e-116	0
172	8.05577e-117	0
172.1	5.0605e-117	0
172.2	3.17762e-117	0
172.3	1.9945e-117	0
172.4	1.25138e-117	0
172.5	7.84815e-118	0
172.6	4.92003e-118	0
172.7	3.08313e-118	0
172.8	1.93125e-118	0
172.9	1.20923e-118	0
173	7.56832e-119	0
173.1	4.73494e-119	0
173.2	2.9611e-119	0
173.3	1.85103e-119	0
173.4	1.15664e-119	0
173.5	7.22445e-120	0
173.6	4.5106e-120	0
173.7	2.81505e-120	0
173.8	1.75615e-120	0
173.9	1.09512e-120	0
174	6.82625e-121	0
174.1	4.2533e-121	0
174.2	2.64907e-121	0
174.3	1.64924e-121	0
174.4	1.02635e-121	0
174.5	6.38457e-122	0
174.6	3.97e-122	0
174.7	2.46758e-122	0
174.8	1.53312e-122	0
174.9	9.52146e-123	0
175	5.91091e-123	0
175.1	3.66798e-123	0
175.2	2.27522e-123	0
175.3	1.41072e-123	0
175.4	8.74347e-124	0
175.5	5.41687e-124	0
175.6	3.35457e-124	0
175.7	2.07657e-124	0
175.8	1.28493e-124	0
175.9	7.94761e-125	0
176	4.91378e-125	0
176.1	3.03681e-125	0
176.2	1.87604e-125	0
176.3	1.15849e-125	0
176.4	7.15092e-126	0
176.5	4.4122e-126	0
176.6	2.72127e-126	0
176.7	1.67769e-126	0
176.8	1.03389e-126	0
176.9	6.36883e-127	0
177	3.92164e-127	0
177.1	2.41379e-127	0
177.2	1.48509e-127	0
177.3	9.13334e-128	0
177.4	5.61474e-128	0
177.5	3.45026e-128	0
177.6	2.11933e-128	0
177.7	1.30127e-128	0
177.8	7.98652e-129	0
177.9	4.89973e-129	0
178	3.00476e-129	0
178.1	1.84191e-129	0
178.2	1.12863e-129	0
178.3	6.91287e-130	0
178.4	4.2324e-130	0
178.5	2.59023e-130	0
178.6	1.58458e-130	0
178.7	9.68971e-131	0
178.8	5.92286e-131	0
178.9	3.61888e-131	0
179	2.21025e-131	0
179.1	1.34937e-131	0
179.2	8.23459e-132	0
179.3	5.02316e-132	0
179.4	3.06291e-132	0
179.5	1.86687e-132	0
179.6	1.13741e-132	0
179.7	6.927e-133	0
179.8	4.21691e-133	0
179.9	2.56606e-133	0
180	1.56085e-133	0
180.1	9.4903e-134	0
180.2	5.76794e-134	0
180.3	3.50417e-134	0
180.4	2.128e-134	0
180.5	1.29176e-134	0
180.6	7.83815e-135	0
180.7	4.75411e-135	0
180.8	2.88236e-135	0
180.9	1.74682e-135	0
181	1.05821e-135	0
181.1	6.40796e-136	0
181.2	3.87873e-136	0
181.3	2.34684e-136	0
181.4	1.41938e-136	0
181.5	8.58099e-137	0
181.6	5.1856e-137	0
181.7	3.13244e-137	0
181.8	1.89143e-137	0
181.9	1.14162e-137	0
182	6.88769e-138	0
182.1	4.15384e-138	0
182.2	2.50408e-138	0
182.3	1.50894e-138	0
182.4	9.08898e-139	0
182.5	5.47246e-139	0
182.6	3.29362e-139	0
182.7	1.98147e-139	0
182.8	1.19158e-139	0
182.9	7.16279e-140	0
183	4.30392e-140	0
183.1	2.58505e-140	0
183.2	1.55202e-140	0
183.3	9.31426e-141	0
183.4	5.58756e-141	0
183.5	3.35057e-141	0
183.6	2.00834e-141	0
183.7	1.20332e-141	0
183.8	7.20685e-142	0
183.9	4.31453e-142	0
184	2.58193e-142	0
184.1	1.54447e-142	0
184.2	9.23498e-143	0
184.3	5.5197e-143	0
184.4	3.29775e-143	0
184.5	1.96945e-143	0
184.6	1.17569e-143	0
184.7	7.01558e-144	0
184.8	4.18464e-144	0
184.9	2.49503e-144	0
185	1.48701e-144	0
185.1	8.85887e-145	0
185.2	5.27551e-145	0
185.3	3.14031e-145	0
185.4	1.86855e-145	0
185.5	1.11137e-145	0
185.6	6.60749e-146	0
185.7	3.92678e-146	0
185.8	2.33271e-146	0
185.9	1.38518e-146	0
186	8.22196e-147	0
186.1	4.87829e-147	0
186.2	2.89323e-147	0
186.3	1.71522e-147	0
186.4	1.01644e-147	0
186.5	6.02094e-148	0
186.6	3.56509e-148	0
186.7	2.11009e-148	0
186.8	1.2484e-148	0
186.9	7.38291e-149	0
187	4.36441e-149	0
187.1	2.57897e-149	0
187.2	1.52332e-149	0
187.3	8.99408e-150	0
187.4	5.30819e-150	0
187.5	3.13155e-150	0
187.6	1.84669e-150	0
187.7	1.08856e-150	0
187.8	6.41407e-151	0
187.9	3.77779e-151	0
188	2.22416e-151	0
188.1	1.30893e-151	0
188.2	7.69995e-152	0
188.3	4.52776e-152	0
188.4	2.66135e-152	0
188.5	1.56366e-152	0
188.6	9.1835e-153	0
188.7	5.39132e-153	0
188.8	3.16378e-153	0
188.9	1.85583e-153	0
189	1.08816e-153	0
189.1	6.37784e-154	0
189.2	3.73659e-154	0
189.3	2.18827e-154	0
189.4	1.281e-154	0
189.5	7.4958e-155	0
189.6	4.38441e-155	0
189.7	2.56347e-155	0
189.8	1.49819e-155	0
189.9	8.75244e-156	0
190	5.1111e-156	0
190.1	2.98347e-156	0
190.2	1.74082e-156	0
190.3	1.01533e-156	0
190.4	5.91947e-157	0
190.5	3.44971e-157	0
190.6	2.00958e-157	0
190.7	1.17017e-157	0
190.8	6.81112e-158	0
190.9	3.96287e-158	0
191	2.30475e-158	0
191.1	1.33986e-158	0
191.2	7.7861e-159	0
191.3	4.52275e-159	0
191.4	2.62608e-159	0
191.5	1.52418e-159	0
191.6	8.84276e-160	0
191.7	5.12817e-160	0
191.8	2.97276e-160	0
191.9	1.72258e-160	0
192	9.97751e-161	0
192.1	5.77681e-161	0
192.2	3.34331e-161	0
192.3	1.93414e-161	0
192.4	1.11847e-161	0
192.5	6.46518e-162	0
192.6	3.7356e-162	0
192.7	2.15757e-162	0
192.8	1.24563e-162	0
192.9	7.18852e-163	0
193	4.14678e-163	0
193.1	2.39115e-163	0
193.2	1.37824e-163	0
193.3	7.9408e-164	0
193.4	4.57328e-164	0
193.5	2.63278e-164	0
193.6	1.51504e-164	0
193.7	8.71477e-165	0
193.8	5.01084e-165	0
193.9	2.87998e-165	0
194	1.65459e-165	0
194.1	9.50197e-166	0
194.2	5.45457e-166	0
194.3	3.1299e-166	0
194.4	1.79524e-166	0
194.5	1.02929e-166	0
194.6	5.89897e-167	0
194.7	3.37938e-167	0
194.8	1.93518e-167	0
194.9	1.10772e-167	0
195	6.33809e-168	0
195.1	3.62503e-168	0
195.2	2.07246e-168	0
195.3	1.18436e-168	0
195.4	6.76561e-169	0
195.5	3.86324e-169	0
195.6	2.20505e-169	0
195.7	1.25808e-169	0
195.8	7.175e-170	0
195.9	4.09032e-170	0
196	2.33086e-170	0
196.1	1.3277e-170	0
196.2	7.55967e-171	0
196.3	4.3026e-171	0
196.4	2.44783e-171	0
196.5	1.39205e-171	0
196.6	7.91317e-172	0
196.7	4.49645e-172	0
196.8	2.55395e-172	0
196.9	1.45003e-172	0
197	8.22934e-173	0
197.1	4.66848e-173	0
197.2	2.64734e-173	0
197.3	1.5006e-173	0
197.4	8.50247e-174	0
197.5	4.81557e-174	0
197.6	2.72629e-174	0
197.7	1.54284e-174	0
197.8	8.72754e-175	0
197.9	4.93499e-175	0
198	2.78935e-175	0
198.1	1.57595e-175	0
198.2	8.90031e-176	0
198.3	5.02447e-176	0
198.4	2.8353e-176	0
198.5	1.5993e-176	0
198.6	9.01747e-177	0
198.7	5.08232e-177	0
198.8	2.86327e-177	0
198.9	1.61244e-177	0
199	9.07675e-178	0
199.1	5.10739e-178	0
199.2	2.8727e-178	0
199.3	1.61512e-178	0
199.4	9.07701e-179	0
199.5	5.09921e-179	0
199.6	2.86343e-179	0
199.7	1.60728e-179	0
199.8	9.01823e-180	0
[truncated: 2 more rows]
