# Supplementary material for: Domain coupling in allosteric regulation of SthK measured using time-resolved transition metal ion FRET
Source: eLife. 2025 Aug 12;14:RP106892. doi: 10.7554/eLife.106892 (PMC12342821; doi:10.7554/eLife.106892)
Supplement: Figure 4—source data 1. [file elife-106892-fig4-data1.xlsx]

## Sheet: Figure 4 - B
	B - Representative Traces						B- Weighted Residuals
	SthKcterm-S361Acd	SthKcterm-S361Acd-V416C					SthKcterm-S361Acd	SthKcterm-S361Acd-V416C
Time (s)	'+[Ru(bpy)2phenM]2+	+[Ru(bpy)2phenM]2+	+[Ru(bpy)2phenM]2+ +1uM cAMP	+[Ru(bpy)2phenM]2+ + 320uM cAMP		Time (s)	'+[Ru(bpy)2phenM]2+	+[Ru(bpy)2phenM]2+	+[Ru(bpy)2phenM]2+ +1uM cAMP	+[Ru(bpy)2phenM]2+ + 320uM cAMP
0	0.000846423	0.00038501	0.000305135	0.00017602		0	-0.288562	0.228718	-0.260948	2.12206
2.5e-11	0.000564282	0.000128337	0.000305135	0.000704078		2.5e-11	-0.288562	4.06169	-1.13895	-0.371729
5e-11	0.000282141	0.000128337	0.000305135	0.000528059		5e-11	-1.15464	1.76191	2.37306	1.2908
7.5e-11	0.000282141	0.000256673	0.000305135	0.000352039		7.5e-11	-1.15464	0.228718	2.37306	-0.371729
1e-10	0.000282141	0.000256673	0.000305135	0.00017602		1e-10	-1.15464	0.228718	-0.260948	-0.371729
1.25e-10	0.000282141	0.000256673	0	0.00017602		1.25e-10	-0.288562	1.76191	1.49506	0.459533
1.5e-10	0.000282141	0	0.00061027	0.000528059		1.5e-10	-0.288562	-0.537876	-1.13895	1.2908
1.75e-10	0.000564282	0.000256673	0.000305135	0.00017602		1.75e-10	1.44358	0.995313	0.617054	-0.371729
2e-10	0	0.00038501	0.000457702	0.00017602		2e-10	1.44358	-0.537876	-0.260948	-0.371729
2.25e-10	0	0.00038501	0.000457702	0.000352039		2.25e-10	-0.288562	1.76191	4.12906	0.459533
2.5e-10	0.00112856	0.000256673	0.000305135	0.000352039		2.5e-10	-1.15464	0.228718	1.49506	2.12206
2.75e-10	0	0.000513347	0.000457702	0		2.75e-10	-1.15464	0.228718	0.617054	-1.20299
3e-10	0	0.00077002	0.000305135	0.00017602		3e-10	-1.15464	0.228718	-1.13895	1.2908
3.25e-10	0.000846423	0.00038501	0.00061027	0.000352039		3.25e-10	0.577511	1.76191	3.25106	0.459533
3.5e-10	0.000282141	0.000256673	0.000152567	0		3.5e-10	-1.15464	-0.537876	0.617054	-1.20299
3.75e-10	0.000282141	0.000256673	0.000305135	0.000352039		3.75e-10	0.577511	-0.537876	3.25106	-0.371729
4e-10	0	0.000641684	0.00061027	0.000528059		4e-10	0.577511	-0.537876	-0.260948	-1.20299
4.25e-10	0.000564282	0.00038501	0.00061027	0.00017602		4.25e-10	-1.15464	-0.537876	0.617054	-0.371729
4.5e-10	0.000282141	0.000256673	0.000457702	0.000352039		4.5e-10	3.17573	-0.537876	0.617054	0.459533
4.75e-10	0.000846423	0.000513347	0.000305135	0		4.75e-10	-0.288562	-0.537876	-0.260948	-1.20299
5e-10	0.00112856	0.000256673	0.000305135	0.000528059		5e-10	-0.288562	-1.30447	-1.13895	2.12206
5.25e-10	0	0.000513347	0.000152567	0.00017602		5.25e-10	0.577511	0.995313	-1.13895	-0.371729
5.5e-10	0.000282141	0.000128337	0.00061027	0.000352039		5.5e-10	0.577511	0.995313	1.49506	-0.371729
5.75e-10	0.000564282	0.000513347	0.000152567	0.000528059		5.75e-10	1.44358	1.76191	4.12906	0.459533
6e-10	0.00112856	0.000128337	0.000305135	0.00017602		6e-10	-0.288562	0.995313	-0.260948	2.12206
6.25e-10	0	0.000513347	0.00061027	0.00017602		6.25e-10	-0.288562	0.228718	-1.13895	-1.20299
6.5e-10	0.000282141	0.000641684	0.000457702	0.000352039		6.5e-10	-1.15464	0.995313	1.49506	1.2908
6.75e-10	0	0.000256673	0.000305135	0.00017602		6.75e-10	0.577511	-0.537876	0.617054	0.459533
7e-10	0.000846423	0.000128337	0.000152567	0.00017602		7e-10	-0.288562	0.995313	-0.260948	1.2908
7.25e-10	0.000282141	0.000256673	0.000152567	0.000704078		7.25e-10	-1.15464	0.228718	-1.13895	1.2908
7.5e-10	0.000564282	0.000641684	0.00061027	0.000528059		7.5e-10	0.577511	0.228718	-1.13895	0.459533
7.75e-10	0.000282141	0.000256673	0.000457702	0.000352039		7.75e-10	2.30966	-0.537876	-1.13895	1.2908
8e-10	0.000846423	0.00038501	0.00061027	0.00017602		8e-10	-0.288562	-1.30447	0.617054	-0.371729
8.25e-10	0.00112856	0.00038501	0.000305135	0.00017602		8.25e-10	-1.15464	-0.537876	3.25106	-0.371729
8.5e-10	0.000282141	0.000513347	0.000305135	0		8.5e-10	-0.288562	-1.30447	2.37306	1.2908
8.75e-10	0.000564282	0.000641684	0.000305135	0.000528059		8.75e-10	0.577511	-0.537876	1.49506	-1.20299
9e-10	0.000564282	0.00038501	0	0.00017602		9e-10	-1.15464	3.2951	-0.260948	0.459533
9.25e-10	0	0.000256673	0.000152567	0.000528059		9.25e-10	0.577511	0.228718	2.37306	-1.20299
9.5e-10	0.000564282	0.000128337	0.000152567	0.000352039		9.5e-10	-1.15464	-0.537876	1.49506	0.459533
9.75e-10	0	0.000256673	0.00061027	0.000352039		9.75e-10	0.577511	-1.30447	-1.13895	-0.371729
1e-09	0.000564282	0.000256673	0.000305135	0.000880098		1e-09	0.577511	1.76191	0.617054	1.2908
1.025e-09	0	0.00038501	0.000152567	0.000880098		1.025e-09	-0.288562	-1.30447	-0.260948	-1.20299
1.05e-09	0.000282141	0.000128337	0.000305135	0		1.05e-09	-0.288562	1.76191	-1.13895	-0.371729
1.075e-09	0.0014107	0.00038501	0	0.000352039		1.075e-09	-1.15464	0.228718	0.617054	0.459533
1.1e-09	0.000564282	0.000513347	0.000305135	0		1.1e-09	2.30966	-1.30447	-1.13895	-1.20299
1.125e-09	0.000282141	0.000256673	0	0.000704078		1.125e-09	1.44358	0.995313	-1.13895	0.459533
1.15e-09	0	0.000256673	0.000305135	0		1.15e-09	-1.15464	-0.537876	-1.13895	1.2908
1.175e-09	0	0.000128337	0.000152567	0.000528059		1.175e-09	-0.288562	-0.537876	-1.13895	-1.20299
1.2e-09	0.000564282	0.000128337	0.000305135	0.00017602		1.2e-09	1.44358	3.2951	-1.13895	-0.371729
1.225e-09	0.000282141	0.00077002	0.000152567	0.000352039		1.225e-09	-0.288562	-1.30447	1.49506	0.459533
1.25e-09	0.000282141	0.000128337	0.000152567	0.000880098		1.25e-09	-1.15464	-1.30447	1.49506	0.459533
1.275e-09	0.000282141	0.000128337	0	0.00017602		1.275e-09	-0.288562	0.228718	0.617054	1.2908
1.3e-09	0.000282141	0.000513347	0.000305135	0		1.3e-09	-0.288562	-0.537876	0.617054	0.459533
1.325e-09	0.000564282	0.000641684	0.000305135	0.000352039		1.325e-09	-1.15464	0.228718	0.617054	0.459533
1.35e-09	0.000282141	0.000256673	0.00061027	0.000352039		1.35e-09	-0.288562	-1.30447	0.617054	-0.371729
1.375e-09	0.000564282	0	0.000305135	0		1.375e-09	1.44358	0.228718	0.617054	2.95332
1.4e-09	0.000564282	0	0.000305135	0.000528059		1.4e-09	0.577511	0.228718	1.49506	-1.20299
1.425e-09	0.000564282	0	0	0.00017602		1.425e-09	-1.15464	-0.537876	-0.260948	-0.371729
1.45e-09	0.000282141	0.000256673	0.000457702	0.000352039		1.45e-09	-1.15464	1.76191	1.49506	-1.20299
1.475e-09	0.000282141	0.000128337	0	0.000704078		1.475e-09	-0.288562	0.995313	-1.13895	-0.371729
1.5e-09	0.000282141	0.00077002	0.000152567	0.000528059		1.5e-09	-1.15464	-1.30447	1.49506	1.2908
1.525e-09	0.000282141	0.000256673	0.000457702	0.000880098		1.525e-09	0.577511	-0.537876	1.49506	-0.371729
1.55e-09	0.000846423	0.000256673	0.000152567	0.00017602		1.55e-09	-0.288562	-0.537876	-0.260948	1.2908
1.575e-09	0	0.000641684	0.000152567	0		1.575e-09	-1.15464	1.76191	-0.260948	-0.371729
1.6e-09	0.000564282	0.000128337	0.000305135	0.00017602		1.6e-09	0.577511	0.228718	1.49506	1.2908
1.625e-09	0.000564282	0.000513347	0.000152567	0.000352039		1.625e-09	-0.288562	0.995313	0.617054	1.2908
1.65e-09	0.000282141	0.000641684	0.000305135	0.000352039		1.65e-09	0.577511	0.228718	0.617054	1.2908
1.675e-09	0.000564282	0.000256673	0.000762837	0.000528059		1.675e-09	-0.288562	-0.537876	1.49506	0.459533
1.7e-09	0.00112856	0.000128337	0.000152567	0.00017602		1.7e-09	0.577511	2.5285	1.49506	-1.20299
1.725e-09	0.000282141	0	0.000152567	0.000352039		1.725e-09	0.577511	0.228718	2.37306	-1.20299
1.75e-09	0.000282141	0.000128337	0.000915405	0		1.75e-09	-1.15464	-0.537876	-0.260948	0.459533
1.775e-09	0.000564282	0.000513347	0.000152567	0.00017602		1.775e-09	-0.288562	3.2951	0.617054	0.459533
1.8e-09	0.000564282	0.000256673	0.000457702	0.00017602		1.8e-09	2.30966	0.228718	1.49506	-1.20299
1.825e-09	0.000564282	0.000128337	0.000152567	0.000352039		1.825e-09	1.44358	-1.30447	0.617054	1.2908
1.85e-09	0.000564282	0.000513347	0.000457702	0.000704078		1.85e-09	1.44358	0.995313	0.617054	2.12206
1.875e-09	0	0.000513347	0.000152567	0.000352039		1.875e-09	-0.288562	-1.30447	0.617054	-0.371729
1.9e-09	0.000282141	0.000641684	0.000305135	0.000704078		1.9e-09	-0.288562	-0.537876	-0.260948	0.459533
1.925e-09	0.000282141	0.000641684	0	0		1.925e-09	-0.288562	-0.537876	-1.13895	1.2908
1.95e-09	0.000282141	0.000256673	0.000152567	0.000352039		1.95e-09	-1.15464	-1.30447	0.617054	3.78458
1.975e-09	0.000282141	0.00102669	0.000152567	0.000352039		1.975e-09	0.577511	0.228718	1.49506	-1.20299
2e-09	0	0.000256673	0.000457702	0.00017602		2e-09	1.44358	0.995313	0.617054	-0.371729
2.025e-09	0.000564282	0.000641684	0.000457702	0.000352039		2.025e-09	0.577511	-1.30447	-1.13895	-0.371729
2.05e-09	0.000846423	0.000641684	0	0.000704078		2.05e-09	-0.288562	1.76191	-0.260948	0.459533
2.075e-09	0.000282141	0.000128337	0.000457702	0.000880098		2.075e-09	-0.288562	0.228718	0.617054	0.459533
2.1e-09	0.000282141	0.00038501	0.000762837	0		2.1e-09	-0.288562	0.228718	-1.13895	0.459533
2.125e-09	0.000282141	0.000256673	0.000457702	0.000352039		2.125e-09	-1.15464	1.76191	0.617054	2.12206
2.15e-09	0.000282141	0.00038501	0.000457702	0.000528059		2.15e-09	3.17573	-1.30447	0.617054	-0.371729
2.175e-09	0.000564282	0.00038501	0.000305135	0.00017602		2.175e-09	-1.15464	-0.537876	1.49506	-0.371729
2.2e-09	0.000282141	0.00038501	0.000457702	0.000528059		2.2e-09	2.30966	-1.30447	0.617054	1.2908
2.225e-09	0	0.000256673	0.000305135	0		2.225e-09	-1.15464	0.995313	1.49506	0.459533
2.25e-09	0	0.00038501	0.000305135	0.000352039		2.25e-09	0.577511	0.228718	0.617054	-1.20299
2.275e-09	0	0.00038501	0.000152567	0.000352039		2.275e-09	-0.288562	0.995313	1.49506	0.459533
2.3e-09	0.000564282	0.000641684	0.000457702	0		2.3e-09	0.577511	-0.537876	-0.260948	-1.20299
2.325e-09	0.000564282	0.00038501	0.000152567	0.00017602		2.325e-09	1.44358	0.228718	0.617054	-0.371729
2.35e-09	0	0.00038501	0.000152567	0.000352039		2.35e-09	1.44358	-0.537876	-0.260948	-0.371729
2.375e-09	0.000564282	0.00038501	0.000152567	0.00017602		2.375e-09	1.44358	0.995313	0.617054	0.459533
2.4e-09	0.000564282	0	0.000305135	0		2.4e-09	-1.15464	-1.30447	1.49506	-1.20299
2.425e-09	0.000282141	0.000898357	0.00061027	0.000528059		2.425e-09	-1.15464	0.228718	-0.260948	1.2908
2.45e-09	0.000564282	0.000641684	0.000152567	0.00017602		2.45e-09	-1.15464	-0.537876	-1.13895	1.2908
2.475e-09	0.000282141	0.000513347	0.00061027	0.000352039		2.475e-09	0.577511	0.228718	-1.13895	-0.371729
2.5e-09	0.000564282	0.00038501	0.000762837	0.000528059		2.5e-09	1.44358	0.995313	-0.260948	-0.371729
2.525e-09	0.000282141	0.00038501	0.000457702	0.000352039		2.525e-09	-1.15464	1.76191	-0.260948	-1.20299
2.55e-09	0.000282141	0.000513347	0.000305135	0.000528059		2.55e-09	0.577511	2.5285	0.617054	-1.20299
2.575e-09	0.000564282	0.000256673	0	0.000352039		2.575e-09	-0.288562	0.995313	1.42787	-1.20299
2.6e-09	0.000564282	0.000513347	0.000305135	0.000528059		2.6e-09	0.490775	0.228718	-0.327273	0.376125
2.625e-09	0.000282141	0.000256673	0.000762837	0.000352039		2.625e-09	0.343053	-0.537876	3.08368	1.09291
2.65e-09	0.000846423	0.00115503	0.00061027	0.000704078		2.65e-09	-0.492628	0.995313	0.485351	0.316035
2.675e-09	0.00112856	0.00115503	0.00106797	0.000880098		2.675e-09	0.274356	3.21484	1.71126	1.0681
2.7e-09	0	0.00128337	0.000305135	0.00140816		2.7e-09	-0.591015	1.58909	1.43867	0.941526
2.725e-09	0.000846423	0.00128337	0.00198338	0.000880098		2.725e-09	1.4556	3.72897	0.725267	1.51606
2.75e-09	0.000282141	0.00154004	0.00106797	0.00158418		2.75e-09	1.37228	-0.688667	1.33077	1.36161
2.775e-09	0.000282141	0.0014117	0.00274621	0.00193622		2.775e-09	1.97867	3.38417	1.86213	0.55011
2.8e-09	0.00112856	0.00256673	0.00198338	0.00140816		2.8e-09	1.14068	5.31102	1.62437	5.70466
2.825e-09	0.000564282	0.00308008	0.00213594	0.00211223		2.825e-09	2.73801	1.08596	2.03903	-0.357045
2.85e-09	0.000564282	0.00436345	0.00244108	0.00193622		2.85e-09	2.22907	6.19848	2.11558	2.24103
2.875e-09	0	0.00256673	0.00259365	0.00422447		2.875e-09	2.23146	3.17191	2.51979	0.321548
2.9e-09	0.00197499	0.00410678	0.00381419	0.00264029		2.9e-09	2.76468	1.56699	2.01286	3.16234
2.925e-09	0.00225713	0.00462012	0.00335648	0.00404845		2.925e-09	3.68405	5.63579	3.49331	2.11394
2.95e-09	0.00197499	0.00603183	0.00549243	0.00404845		2.95e-09	3.88379	2.41057	4.63319	2.5924
2.975e-09	0.0014107	0.00821355	0.0061027	0.0072168		2.975e-09	3.15255	2.34991	3.9655	3.36352
3e-09	0.00310355	0.0107803	0.00442446	0.00774486		3e-09	2.21555	7.00426	3.84968	2.12722
3.025e-09	0.00536068	0.0162988	0.00823864	0.00651272		3.025e-09	0.420828	5.61442	4.30186	3.44075
3.05e-09	0.00592496	0.0383727	0.0129682	0.0112653		3.05e-09	1.15335	4.02956	3.63599	2.43
3.075e-09	0.00479639	0.0938141	0.0259365	0.0149617		3.075e-09	2.05012	0.868676	3.82913	2.99311
3.1e-09	0.00789994	0.198665	0.0633155	0.0302754		3.1e-09	3.2714	1.3561	4.23953	1.47411
3.125e-09	0.0101571	0.366915	0.154398	0.0688236		3.125e-09	1.69265	0.981972	1.75757	3.01342
3.15e-09	0.0262391	0.552618	0.292014	0.175139		3.15e-09	2.05173	-0.644236	1.48885	0.432602
3.175e-09	0.0552996	0.706622	0.456024	0.337958		3.175e-09	2.00078	-0.676527	-1.47981	-0.316513
3.2e-09	0.113138	0.838039	0.670686	0.529995		3.2e-09	-1.32087	-1.74019	-1.87573	-0.985162
3.225e-09	0.233895	0.893865	0.820508	0.694397		3.225e-09	-2.01542	0.240285	0.306145	-1.15869
3.25e-09	0.377222	0.95598	0.898622	0.849822		3.25e-09	-1.78488	0.807247	0.0308004	-0.5404
3.275e-09	0.531271	0.963167	0.972007	0.95385		3.275e-09	-1.00315	0.206237	1.09806	-0.855621
3.3e-09	0.702813	0.991145	0.985586	0.998735		3.3e-09	-0.149362	-0.0810898	-0.347741	0.193759
3.325e-09	0.815951	1.01951	1.01473	0.989406		3.325e-09	-0.902627	-0.590087	0.362653	0.962479
3.35e-09	0.925986	0.99538	1.00832	1.01546		3.35e-09	-0.334294	1.15955	-0.127944	0.512365
3.375e-09	0.936708	0.997176	1.00557	0.984477		3.375e-09	-1.07024	2.07545	1.53291	0.299209
3.4e-09	0.970564	1.01027	0.994892	0.98835		3.4e-09	-3.19352	2.81155	1.08276	-0.15758
3.425e-09	0.981568	1.01245	0.982382	0.960011		3.425e-09	0.596573	2.8211	1.86446	-0.651134
3.45e-09	1.00301	0.987423	0.963463	0.9755		3.45e-09	-0.950396	1.35259	-0.625895	0.772008
3.475e-09	1.02671	0.977413	0.943172	0.920582		3.475e-09	-3.7726	2.95381	2.57423	0.929277
3.5e-09	1.02417	0.968686	0.910675	0.917062		3.5e-09	-1.08777	2.23025	2.76432	-0.222496
3.525e-09	1.03828	0.948152	0.885654	0.884322		3.525e-09	-0.454827	0.690545	0.377444	-0.520776
3.55e-09	1.02756	0.945457	0.897859	0.862144		3.55e-09	-1.66876	1.31599	0.375616	1.63277
3.575e-09	1.0806	0.922741	0.872838	0.850702		3.575e-09	0.133914	-0.365407	0.413085	-1.55889
3.6e-09	1.02615	0.925436	0.858802	0.832925		3.6e-09	1.06758	-0.19512	0.230564	-0.935003
3.625e-09	1.02304	0.913501	0.851937	0.813386		3.625e-09	0.317448	1.03798	0.451717	-2.71155
3.65e-09	0.984389	0.912602	0.836527	0.826236		3.65e-09	-0.425916	0.87085	-0.0161586	0.0794922
3.675e-09	1.01458	0.904261	0.818067	0.804761		3.675e-09	0.606481	0.877533	2.10911	0.0514989
3.7e-09	0.975361	0.893352	0.823712	0.773254		3.7e-09	0.764679	2.1934	1.11504	-0.429206
3.725e-09	0.985518	0.911062	0.799301	0.763045		3.725e-09	-1.78129	1.78702	0.528375	-2.01299
3.75e-09	1.03376	0.87346	0.79274	0.736994		3.75e-09	-1.13919	2.01549	1.34207	2.98684
3.775e-09	0.998214	0.873075	0.777179	0.721504		3.775e-09	-1.44357	2.121	1.62665	-0.273119
3.8e-09	1.00583	0.890785	0.768025	0.739106		3.8e-09	1.37033	-0.549162	-1.53239	0.0426895
3.825e-09	0.982414	0.867428	0.767872	0.70443		3.825e-09	-0.8076	-0.332432	0.16387	-0.0436389
3.85e-09	0.980439	0.860369	0.742393	0.717808		3.85e-09	-1.81649	-0.1973	0.575554	-1.35608
3.875e-09	0.994546	0.856776	0.723017	0.689469		3.875e-09	-1.19897	0.338487	-1.05577	-1.50349
3.9e-09	0.969436	0.861781	0.739494	0.66905		3.9e-09	-0.192778	0.122223	-1.17355	-1.6194
3.925e-09	0.974232	0.869225	0.725763	0.672043		3.925e-09	-1.0867	-0.0901481	0.821027	-0.117438
3.95e-09	1.00019	0.827772	0.685943	0.644232		3.95e-09	-0.601127	1.07992	0.122413	-0.470166
3.975e-09	0.967461	0.825975	0.710964	0.63279		3.975e-09	-0.802891	0.435386	0.640989	-1.21114
4e-09	0.9305	0.82405	0.705777	0.632438		4e-09	-0.165037	0.60338	1.7586	-1.77538
4.025e-09	0.9621	0.816607	0.685638	0.621877		4.025e-09	-2.68483	-1.1886	-2.25593	0.447725
4.05e-09	0.96859	0.827515	0.673433	0.620293		4.05e-09	-1.41886	-1.2084	0.106356	-2.05258
4.075e-09	0.968307	0.819173	0.659091	0.625926		4.075e-09	-0.953092	-0.872434	-0.468585	-1.12513
4.1e-09	0.937836	0.792993	0.665347	0.623285		4.1e-09	0.810276	-0.916987	0.609368	-2.13287
4.125e-09	0.957304	0.789143	0.643987	0.607796		4.125e-09	-0.47466	-0.97033	2.0967	-1.5086
4.15e-09	0.927115	0.799153	0.63285	0.575584		4.15e-09	-1.02634	-0.611675	1.3511	-0.806173
4.175e-09	0.946583	0.800308	0.619576	0.57664		4.175e-09	-1.17178	-1.76888	1.20284	1.60323
4.2e-09	0.927961	0.792993	0.634528	0.582801		4.2e-09	-0.144934	0.156923	-1.17383	-2.39668
4.225e-09	0.907365	0.776951	0.636969	0.565199		4.225e-09	-0.192004	-0.62642	-2.02456	2.40645
4.25e-09	0.924858	0.781186	0.628425	0.564495		4.25e-09	-1.98	0.398898	0.791079	0.978472
4.275e-09	0.914701	0.781956	0.58357	0.558686		4.275e-09	-0.37219	0.472538	-0.479556	-1.07131
4.3e-09	0.891847	0.762834	0.607981	0.546189		4.3e-09	-0.414603	-0.416286	0.603371	-0.479174
4.325e-09	0.925422	0.767197	0.57579	0.52049		4.325e-09	-0.692015	0.39228	1.8451	-0.3541
4.35e-09	0.932758	0.752823	0.596386	0.516793		4.35e-09	-1.32176	-0.0769548	-0.738965	0.480407
4.375e-09	0.902569	0.761935	0.587232	0.533339		4.375e-09	-1.52407	-0.303331	1.59754	-1.46822
4.4e-09	0.884794	0.744353	0.566178	0.52313		4.4e-09	-0.255815	-1.11176	-1.81946	-0.83054
4.425e-09	0.904261	0.74923	0.550311	0.501832		4.425e-09	1.28404	-0.975472	2.19917	-1.15617
4.45e-09	0.902286	0.750128	0.557634	0.506584		4.45e-09	-1.12846	-1.45308	-0.794439	0.609061
4.475e-09	0.885358	0.749358	0.54848	0.505704		4.475e-09	0.119147	1.21829	-0.416275	-1.08875
4.5e-09	0.907365	0.74769	0.55382	0.508344		4.5e-09	-1.27946	-0.116355	1.97013	-0.797632
4.525e-09	0.909058	0.730493	0.542377	0.494439		4.525e-09	-2.43742	-1.27128	-0.687163	0.0814672
4.55e-09	0.891565	0.736139	0.55382	0.485638		4.55e-09	2.61724	1.55727	-0.725782	-0.223409
4.575e-09	0.919215	0.710087	0.515068	0.48775		4.575e-09	0.719533	-0.053466	0.373096	-0.509845
4.6e-09	0.881972	0.725359	0.515831	0.480005		4.6e-09	-1.66586	-0.535676	0.503544	1.49106
4.625e-09	0.876329	0.713809	0.512016	0.470148		4.625e-09	-2.86412	0.0636857	0.734217	0.4445
4.65e-09	0.885922	0.713039	0.504388	0.452722		4.65e-09	0.451462	0.3511	-1.54142	-0.155948
4.675e-09	0.878869	0.708675	0.496607	0.449026		4.675e-09	-0.460723	0.0852182	-1.65487	1.49576
4.7e-09	0.884794	0.719584	0.499353	0.451842		4.7e-09	-0.751055	-1.41993	-0.0527889	-1.45489
4.725e-09	0.878587	0.700847	0.506982	0.464164		4.725e-09	1.41656	-1.10252	-0.0240548	-1.57035
4.75e-09	0.916111	0.69982	0.49142	0.457651		4.75e-09	0.89527	0.184584	0.914089	-0.60777
4.775e-09	0.894951	0.694173	0.49676	0.43248		4.775e-09	-0.532653	0.61098	1.81136	-1.68592
4.8e-09	0.907647	0.704569	0.501489	0.418046		4.8e-09	-0.0705986	0.0530061	-1.09866	-1.62846
4.825e-09	0.852912	0.696355	0.488368	0.421391		4.825e-09	0.120124	0.54302	2.60977	1.52164
4.85e-09	0.856297	0.703799	0.469603	0.432128		4.85e-09	0.5504	-1.28874	-0.302605	-0.681386
4.875e-09	0.876329	0.683521	0.463042	0.417518		4.875e-09	-1.07151	-0.451411	-1.49616	0.843947
4.9e-09	0.880562	0.673511	0.47479	0.41699		4.9e-09	-2.36119	1.59972	1.7904	0.335401
4.925e-09	0.880562	0.665298	0.471586	0.407133		4.925e-09	-0.745736	-0.965244	0.970404	-0.066986
4.95e-09	0.865326	0.666453	0.467924	0.411358		4.95e-09	0.938237	-0.348249	0.980763	0.442945
4.975e-09	0.869276	0.675565	0.45282	0.402733		4.975e-09	-1.16683	-1.35306	-1.41526	-1.02179
5e-09	0.877176	0.673254	0.441225	0.386539		5e-09	0.318741	-0.154885	1.99596	0.304009
5.025e-09	0.863069	0.656442	0.458618	0.403261		5.025e-09	-1.63457	-1.0499	1.64382	-0.655874
5.05e-09	0.848115	0.664143	0.449006	0.385131		5.05e-09	0.213825	0.135741	-0.481943	-0.082001
5.075e-09	0.871533	0.658111	0.444124	0.397628		5.075e-09	-0.611058	-0.801416	0.608434	-0.0584926
5.1e-09	0.847269	0.653106	0.434817	0.379322		5.1e-09	0.529558	-0.818242	-1.00057	0.934752
5.125e-09	0.84868	0.655416	0.445192	0.378794		5.125e-09	-0.316049	-1.22705	0.332132	-1.87373
5.15e-09	0.870404	0.655416	0.438784	0.378266		5.15e-09	-2.32274	-0.316801	-0.00458909	0.811063
5.175e-09	0.857144	0.644764	0.415289	0.377738		5.175e-09	0.17051	0.666183	1.62815	-1.80353
5.2e-09	0.857144	0.645277	0.41895	0.372985		5.2e-09	0.203726	-0.997406	2.16194	-0.823111
5.225e-09	0.847269	0.617556	0.429172	0.366297		5.225e-09	-0.562607	0.573982	0.330733	-1.23139
5.25e-09	0.861658	0.636807	0.405219	0.367177		5.25e-09	0.359443	1.25074	-0.0542256	1.64901
5.275e-09	0.841626	0.64117	0.408576	0.36172		5.275e-09	0.325808	0.0691659	0.653999	0.709592
5.3e-09	0.806359	0.635138	0.418187	0.349223		5.3e-09	-0.677543	0.564122	0.827904	0.571736
5.325e-09	0.828648	0.624358	0.415594	0.354679		5.325e-09	-1.56224	0.164977	-1.24519	1.29275
5.35e-09	0.83824	0.63886	0.408576	0.356968		5.35e-09	-2.61792	0.96191	0.320554	2.01532
5.375e-09	0.848962	0.630005	0.400642	0.335141		5.375e-09	0.266884	0.348625	1.81358	0.245918
5.4e-09	0.812283	0.62423	0.392251	0.353975		5.4e-09	-0.39171	1.09613	0.428398	-0.106869
5.425e-09	0.82893	0.622176	0.393777	0.337077		5.425e-09	1.35713	0.597092	0.296084	0.649377
5.45e-09	0.825262	0.609086	0.392861	0.349751		5.45e-09	0.511188	1.22163	2.49887	0.954153
5.475e-09	0.811155	0.616915	0.378978	0.34271		5.475e-09	0.684653	0.570375	0.296773	1.12629
5.5e-09	0.840498	0.611011	0.393166	0.337253		5.5e-09	-1.31319	0.316377	-1.15199	-0.832743
5.525e-09	0.838805	0.607033	0.388894	0.319475		5.525e-09	0.115645	1.10798	0.831769	-0.0887726
5.55e-09	0.80523	0.603953	0.374095	0.327748		5.55e-09	0.432682	-1.30355	0.138764	-0.812956
5.575e-09	0.846705	0.587141	0.375163	0.329685		5.575e-09	-0.304411	1.18951	0.52448	-0.252621
5.6e-09	0.823005	0.612551	0.361432	0.32018		5.6e-09	1.80583	0.560833	3.03319	0.0201272
5.625e-09	0.819055	0.591119	0.393471	0.317363		5.625e-09	0.988537	-0.677829	-0.283245	-0.904447
5.65e-09	0.808898	0.5856	0.366925	0.330389		5.65e-09	0.161705	-0.733543	0.0307596	2.5378
5.675e-09	0.817926	0.571868	0.365704	0.322292		5.675e-09	-0.413719	-1.68408	0.0731126	-0.308295
5.7e-09	0.799869	0.582392	0.357771	0.310322		5.7e-09	-0.568638	-0.816796	1.03318	0.312891
5.725e-09	0.812848	0.563398	0.360059	0.315955		5.725e-09	0.345508	2.13429	0.295236	-0.4811
5.75e-09	0.783223	0.575205	0.352126	0.300113		5.75e-09	-0.872442	1.984	1.65343	2.00537
5.775e-09	0.810026	0.588167	0.346786	0.30557		5.775e-09	2.97085	1.30472	0.668634	0.611451
5.8e-09	0.801562	0.575334	0.348311	0.299233		5.8e-09	2.68288	-1.73574	0.477201	-0.66236
5.825e-09	0.779555	0.572767	0.357923	0.30909		5.825e-09	-0.617932	-0.441302	1.72625	1.37666
5.85e-09	0.797612	0.555826	0.345413	0.299057		5.85e-09	0.260915	0.638608	0.225605	0.10977
5.875e-09	0.796201	0.56866	0.34404	0.287792		5.875e-09	1.94828	-0.157562	2.09574	-1.05462
5.9e-09	0.820183	0.588809	0.34999	0.296769		5.9e-09	0.0927948	-1.36259	0.580522	0.694675
5.925e-09	0.823287	0.554543	0.341293	0.301169		5.925e-09	1.49147	-0.943231	-0.106244	-1.59012
5.95e-09	0.78943	0.568147	0.343582	0.298881		5.95e-09	-0.581668	-0.726002	0.692134	0.256992
5.975e-09	0.813412	0.552746	0.33458	0.282511		5.975e-09	0.842815	0.61474	2.12137	0.0888387
6e-09	0.819619	0.572895	0.34526	0.280575		6e-09	2.12345	-1.758	1.26971	-0.435459
6.025e-09	0.794791	0.550308	0.344955	0.287616		6.025e-09	0.839307	-1.4217	0.691303	0.858527
6.05e-09	0.81708	0.555056	0.336716	0.291312		6.05e-09	2.11816	-0.771515	0.476574	0.792737
6.075e-09	0.809744	0.557623	0.323748	0.293425		6.075e-09	0.262868	0.512354	2.07983	0.438968
6.1e-09	0.785198	0.553131	0.320087	0.27107		6.1e-09	0.0538604	-1.39538	1.66179	0.765276
6.125e-09	0.81313	0.543891	0.313068	0.259101		6.125e-09	1.23072	0.169566	-0.574481	-2.06599
6.15e-09	0.785198	0.551976	0.318866	0.269134		6.15e-09	-0.249655	1.12097	-0.387429	-0.941317
6.175e-09	0.790841	0.550693	0.32329	0.268606		6.175e-09	0.0900042	2.16986	-0.0677675	-1.12534
6.2e-09	0.780966	0.530416	0.334428	0.258397		6.2e-09	-0.846979	0.0126981	-0.507012	-0.785665
6.225e-09	0.792251	0.533881	0.305287	0.261741		6.225e-09	-0.0771534	0.794924	-1.04148	-2.15421
6.25e-09	0.77363	0.536319	0.315815	0.262445		6.25e-09	0.385262	-1.05976	2.00856	-0.906286
6.275e-09	0.797612	0.539014	0.324206	0.255228		6.275e-09	-0.494643	0.839523	-0.286057	0.853207
6.3e-09	0.788302	0.538373	0.308186	0.251708		6.3e-09	1.02093	-0.0778364	1.44344	1.04143
6.325e-09	0.788019	0.515144	0.312458	0.243259		6.325e-09	0.933406	1.17687	0.529566	0.983394
6.35e-09	0.791123	0.526566	0.30605	0.262269		6.35e-09	-0.823925	-1.35977	-0.619833	1.60571
6.375e-09	0.772219	0.516555	0.303152	0.245899		6.375e-09	0.852242	0.719841	0.568028	1.00436
6.4e-09	0.782941	0.514374	0.296591	0.256284		6.4e-09	1.33198	-1.66061	-0.0211349	1.40488
6.425e-09	0.784634	0.525667	0.299337	0.245019		6.425e-09	-0.000325543	-0.269502	-0.798747	1.31304
6.45e-09	0.755855	0.51078	0.29354	0.256637		6.45e-09	-0.130438	-0.924952	0.163565	1.24326
6.475e-09	0.776734	0.527464	0.29415	0.239915		6.475e-09	0.317655	-0.46024	0.276159	-2.15306
6.5e-09	0.760652	0.508855	0.294913	0.245547		6.5e-09	-0.163446	-0.910232	0.524675	-1.54363
6.525e-09	0.758395	0.523742	0.292319	0.23745		6.525e-09	0.891792	0.0969328	-0.133107	0.462725
6.55e-09	0.783223	0.523357	0.285759	0.253644		6.55e-09	0.615164	0.402242	-1.14695	1.27598
6.575e-09	0.736105	0.503593	0.304372	0.238154		6.575e-09	-1.43328	-0.0577763	-1.26075	1.91494
6.6e-09	0.755573	0.508598	0.295523	0.241323		6.6e-09	1.22866	1.50074	-0.653288	-0.968906
6.625e-09	0.767705	0.491915	0.299185	0.239563		6.625e-09	-0.458089	1.23415	-0.396034	0.949702
6.65e-09	0.766012	0.506032	0.276452	0.239563		6.65e-09	0.706354	0.60973	0.706934	0.371448
6.675e-09	0.758959	0.479723	0.286674	0.23833		6.675e-09	3.20354	0.455853	1.46102	0.448406
6.7e-09	0.766577	0.502182	0.283013	0.234458		6.7e-09	0.0896924	-0.770783	-1.16131	-0.010705
6.725e-09	0.762909	0.497433	0.28881	0.228649		6.725e-09	-0.59253	0.34001	0.274909	0.291176
6.75e-09	0.739773	0.495636	0.272333	0.223369		6.75e-09	1.83369	0.517354	-0.635965	0.130743
6.775e-09	0.742595	0.484343	0.267908	0.227241		6.775e-09	0.844537	-0.325563	1.42256	1.24996
6.8e-09	0.755855	0.49153	0.275842	0.223545		6.8e-09	-0.593483	1.44661	-1.35976	0.208862
6.825e-09	0.779837	0.487936	0.280877	0.227065		6.825e-09	0.10742	-0.305834	1.34832	1.5348
6.85e-09	0.722281	0.471252	0.269129	0.216504		6.85e-09	0.671718	-0.801614	-0.0134274	0.379769
6.875e-09	0.762909	0.48614	0.27035	0.220905		6.875e-09	1.73632	1.62079	-0.300811	-0.705593
6.9e-09	0.75388	0.469841	0.27752	0.219144		6.9e-09	-0.0300019	0.740707	1.65356	0.935494
6.925e-09	0.739209	0.487808	0.267298	0.214392		6.925e-09	0.14375	-0.225461	1.99547	0.391124
6.95e-09	0.734977	0.465349	0.26028	0.225481		6.95e-09	-0.15829	0.141872	0.348084	1.75333
6.975e-09	0.765166	0.475744	0.259822	0.219496		6.975e-09	0.993596	0.427887	0.198329	-0.081807
7e-09	0.743159	0.475744	0.256924	0.208407		7e-09	-0.577494	0.264612	2.02073	0.0971962
7.025e-09	0.746545	0.476386	0.261806	0.214216		7.025e-09	0.82762	0.710977	-0.72292	-0.755167
7.05e-09	0.725384	0.475359	0.258602	0.215448		7.05e-09	-1.40852	0.460785	-1.52232	-0.000790467
7.075e-09	0.750495	0.468429	0.25433	0.20207		7.075e-09	-1.25042	-0.921243	0.129335	-0.173608
7.1e-09	0.698581	0.474076	0.26028	0.210871		7.1e-09	-0.326282	0.321283	-0.257577	-0.908028
7.125e-09	0.766577	0.464194	0.247007	0.207351		7.125e-09	-0.0540919	0.0427618	1.45142	0.405768
7.15e-09	0.756137	0.460472	0.255245	0.203127		7.15e-09	-0.524473	0.650189	0.320198	-0.761755
7.175e-09	0.736105	0.451617	0.24426	0.208759		7.175e-09	0.720074	1.46639	-0.0731497	-0.354732
7.2e-09	0.720588	0.474974	0.251584	0.213864		7.2e-09	-0.0691784	-0.287716	-0.220913	1.07448
7.225e-09	0.738927	0.445842	0.242887	0.196262		7.225e-09	-0.979616	0.589823	-1.41892	-0.697737
7.25e-09	0.726795	0.443275	0.253262	0.206999		7.25e-09	-0.857822	-1.09406	2.50154	0.220419
7.275e-09	0.754162	0.453542	0.240904	0.215096		7.275e-09	2.47504	0.616838	-1.1072	2.00743
7.3e-09	0.709866	0.453542	0.251584	0.208407		7.3e-09	-0.0105884	0.553867	0.0135498	0.677929
7.325e-09	0.724256	0.451104	0.236632	0.198198		7.325e-09	-0.445498	-0.539116	0.205485	1.19071
7.35e-09	0.723691	0.452387	0.241209	0.189045		7.35e-09	-0.505226	1.76714	-0.71448	0.14858
7.375e-09	0.736105	0.439425	0.239073	0.207351		7.375e-09	-1.47319	0.563988	0.587213	-0.708652
7.4e-09	0.705352	0.438527	0.246854	0.191333		7.4e-09	-0.453599	0.579194	1.28508	1.52805
7.425e-09	0.735259	0.462012	0.239073	0.184821		7.425e-09	-0.693686	-0.400788	-0.0748229	0.0628918
7.45e-09	0.722281	0.43981	0.236937	0.20207		7.45e-09	-1.02456	2.15493	1.10703	0.739246
7.475e-09	0.725948	0.430185	0.24838	0.193093		7.475e-09	-0.0293791	1.12929	-0.3903	0.284394
7.5e-09	0.72877	0.435062	0.23709	0.195382		7.5e-09	-0.186198	0.672415	0.613548	-1.11658
7.525e-09	0.717766	0.436088	0.240446	0.183764		7.525e-09	-0.197649	-0.684667	-1.30718	1.38846
7.55e-09	0.706763	0.433265	0.233733	0.196438		7.55e-09	-0.449469	-1.25825	2.19107	0.117894
7.575e-09	0.705634	0.419661	0.217409	0.187813		7.575e-09	-0.406152	-0.550195	-0.770951	1.04339
7.6e-09	0.717766	0.441222	0.222443	0.185525		7.6e-09	-0.932398	-0.957186	0.207523	0.46147
7.625e-09	0.725948	0.42749	0.228393	0.185173		7.625e-09	-0.233343	0.419115	2.04445	0.43619
7.65e-09	0.713534	0.431725	0.226258	0.173731		7.65e-09	0.888818	-0.291383	1.62912	1.7586
7.675e-09	0.714098	0.4298	0.228851	0.186933		7.675e-09	-1.38834	-0.551833	1.83578	1.50901
7.7e-09	0.723691	0.431596	0.235259	0.188341		7.7e-09	1.06311	0.0735689	2.32938	-0.0980537
7.725e-09	0.733566	0.435832	0.223664	0.184468		7.725e-09	0.740327	-0.536497	-0.209919	-0.695356
7.75e-09	0.707609	0.430441	0.217561	0.174787		7.75e-09	0.171441	-1.52036	0.566383	0.574912
7.775e-09	0.729052	0.426335	0.224427	0.167571		7.775e-09	-1.34495	1.9132	-1.88727	0.910759
7.8e-09	0.683345	0.407726	0.226868	0.174435		7.8e-09	0.269336	0.490025	1.33351	-0.891268
7.825e-09	0.688142	0.413629	0.217103	0.178132		7.825e-09	0.117292	-0.481095	-0.156761	-1.16088
7.85e-09	0.684756	0.412988	0.217714	0.172675		7.85e-09	-0.741244	-1.2382	0.169864	-2.5783
7.875e-09	0.692938	0.404132	0.223511	0.181476		7.875e-09	0.605281	-0.593378	-0.192329	0.731318
7.9e-09	0.715791	0.413116	0.217103	0.175139		7.9e-09	0.0496053	0.581627	0.213386	0.488914
7.925e-09	0.692938	0.410549	0.22107	0.171795		7.925e-09	0.199843	0.437228	-0.817618	0.302246
7.95e-09	0.686167	0.412218	0.224427	0.174611		7.95e-09	1.8026	-0.437986	0.654146	-0.435143
7.975e-09	0.677702	0.416838	0.207797	0.169331		7.975e-09	0.313424	0.919128	-2.01388	0.096919
8e-09	0.690116	0.400282	0.215578	0.170035		8e-09	0.709927	1.61449	1.12058	1.00703
8.025e-09	0.674599	0.402721	0.204746	0.178132		8.025e-09	1.07531	-0.757893	-0.218594	-1.39648
8.05e-09	0.678549	0.398486	0.210543	0.178132		8.05e-09	-0.306188	0.000424441	-0.461754	0.676764
8.075e-09	0.696324	0.404004	0.20917	0.164754		8.075e-09	0.680468	-1.45006	-1.84048	0.420406
8.1e-09	0.670931	0.397202	0.207949	0.173555		8.1e-09	-0.272262	-0.916358	0.152824	-1.36087
8.125e-09	0.688706	0.39502	0.205356	0.160178		8.125e-09	-0.413774	0.717002	1.80152	0.0474959
8.15e-09	0.678831	0.394379	0.211458	0.165282		8.15e-09	-0.651096	0.716487	-1.94625	0.0202635
8.175e-09	0.690963	0.382572	0.210696	0.169507		8.175e-09	0.182201	-1.71534	1.22712	-0.508833
8.2e-09	0.695477	0.401951	0.212679	0.163874		8.2e-09	0.259728	0.71343	-0.0583043	-0.538963
8.225e-09	0.675727	0.406314	0.199863	0.161058		8.225e-09	-0.899042	1.8629	0.862892	0.169663
8.25e-09	0.696888	0.398101	0.202152	0.159122		8.25e-09	-0.730852	-0.946561	-0.267082	-0.60335
8.275e-09	0.690116	0.390529	0.216036	0.167219		8.275e-09	0.0728688	-1.56817	-1.10164	0.521318
8.3e-09	0.653156	0.388219	0.206729	0.164754		8.3e-09	-0.779642	-2.3301	0.615928	-1.98548
8.325e-09	0.689834	0.385524	0.206881	0.167219		8.325e-09	0.503882	0.615969	1.23711	-0.0558301
8.35e-09	0.679677	0.382058	0.19132	0.169683		8.35e-09	-0.257781	0.104012	1.16946	-1.38028
8.375e-09	0.683345	0.378593	0.199101	0.1468		8.375e-09	-0.3817	1.57837	0.65793	0.616827
8.4e-09	0.691245	0.38578	0.190557	0.155425		8.4e-09	0.0399142	-0.172239	-0.826859	-0.863625
8.425e-09	0.697734	0.382058	0.202304	0.160002		8.425e-09	-1.56782	1.00772	0.51549	-0.303562
8.45e-09	0.672624	0.385395	0.185675	0.144688		8.45e-09	0.0467734	-0.315168	1.16664	-0.435853
8.475e-09	0.659363	0.370508	0.204593	0.159122		8.475e-09	1.60252	-0.722441	-0.189247	-0.932553
8.5e-09	0.674599	0.371663	0.192082	0.15789		8.5e-09	0.536221	-0.763127	-0.629476	-0.190374
8.525e-09	0.616196	0.367941	0.199863	0.151025		8.525e-09	-0.11346	-0.0882756	-0.680798	-0.812859
8.55e-09	0.663031	0.380005	0.18598	0.151377		8.55e-09	-0.343819	0.170618	1.06272	0.142731
8.575e-09	0.662749	0.379363	0.197117	0.142752		8.575e-09	0.304911	0.406082	-1.18198	0.033956
8.6e-09	0.651181	0.364605	0.185369	0.16141		8.6e-09	-0.124002	-2.73205	1.18537	0.748563
8.625e-09	0.687295	0.359985	0.183996	0.15965		8.625e-09	-0.522684	1.11012	0.963339	0.240816
8.65e-09	0.655413	0.357803	0.189031	0.1468		8.65e-09	-1.71184	0.71582	1.53208	-1.89539
8.675e-09	0.661338	0.370765	0.190099	0.155249		8.675e-09	0.812347	0.78746	-0.194155	0.231547
8.7e-09	0.644128	0.365503	0.187658	0.14328		8.7e-09	1.26869	0.671189	0.941514	-0.836676
8.725e-09	0.663313	0.367813	0.189336	0.149441		8.725e-09	-1.18197	1.18781	0.0595919	-1.04603
8.75e-09	0.677138	0.36576	0.185675	0.14504		8.75e-09	0.031694	0.0343457	1.11265	1.7423
8.775e-09	0.651181	0.356648	0.185217	0.151201		8.775e-09	0.353159	-1.03051	-1.83289	-1.25402
8.8e-09	0.652592	0.366016	0.191014	0.151905		8.8e-09	-0.92117	0.214402	-0.0661073	-0.320443
8.825e-09	0.663595	0.357033	0.186437	0.149969		8.825e-09	-0.0696752	-0.359518	-0.216023	-1.2509
8.85e-09	0.654849	0.352156	0.190557	0.151377		8.85e-09	-0.317192	-0.0354273	1.61635	-0.627338
8.875e-09	0.668674	0.361396	0.176673	0.145392		8.875e-09	1.60761	-1.56386	-0.721831	-0.501763
8.9e-09	0.617324	0.365631	0.182318	0.143808		8.9e-09	0.188247	-0.932649	0.595875	-1.25254
8.925e-09	0.66021	0.358829	0.177589	0.152257		8.925e-09	-3.11775	1.87045	-0.424288	-0.125366
8.95e-09	0.637638	0.36422	0.183691	0.149617		8.95e-09	-0.414795	-0.644214	-1.07236	-0.0940231
8.975e-09	0.624942	0.346252	0.1753	0.138175		8.975e-09	-0.16295	0.134035	0.221407	-1.13375
9e-09	0.660774	0.343429	0.174385	0.152257		9e-09	-0.0800473	0.0748107	0.384654	-0.538402
9.025e-09	0.647513	0.340606	0.178199	0.138175		9.025e-09	1.86355	-2.41244	1.24679	-1.01646
9.05e-09	0.646667	0.359086	0.184912	0.150849		9.05e-09	-0.0184554	-0.312715	0.972184	-2.82751
9.075e-09	0.644974	0.340477	0.176978	0.143104		9.075e-09	0.537613	-0.786512	0.695465	-0.10962
9.1e-09	0.644974	0.346638	0.182471	0.134831		9.1e-09	0.0396736	0.23499	-0.491871	-0.433704
9.125e-09	0.616196	0.341119	0.17591	0.140992		9.125e-09	-1.17712	-0.555689	0.10712	1.40604
9.15e-09	0.659081	0.341632	0.174995	0.12779		9.15e-09	1.08676	1.02657	-0.2926	0.412332
9.175e-09	0.634253	0.347408	0.173011	0.136591		9.175e-09	-0.544588	-0.616835	-0.782775	-1.99241
9.2e-09	0.622403	0.334446	0.16935	0.14592		9.2e-09	-0.501714	0.166992	-0.743701	1.51909
9.225e-09	0.622967	0.331622	0.182318	0.143104		9.225e-09	-0.0812962	0.538448	-0.350109	-0.926174
9.25e-09	0.649488	0.338809	0.171333	0.136943		9.25e-09	0.0298401	1.15456	-1.40885	-0.0697851
9.275e-09	0.626917	0.33098	0.168587	0.135183		9.275e-09	0.899451	0.670496	1.44845	0.724336
9.3e-09	0.631713	0.345226	0.17591	0.133247		9.3e-09	1.73676	0.673891	-0.238105	-0.125729
9.325e-09	0.632278	0.33098	0.166909	0.129198		9.325e-09	-0.575496	0.30788	1.04976	0.151879
9.35e-09	0.62071	0.338424	0.172249	0.134127		9.35e-09	0.087032	-1.63513	0.370077	1.23972
9.375e-09	0.641306	0.330082	0.156076	0.134479		9.375e-09	-0.917259	0.876244	-0.522251	-2.27804
9.4e-09	0.623813	0.325334	0.168587	0.134831		9.4e-09	0.895495	-0.0366272	-0.0991076	-1.32182
9.425e-09	0.643281	0.325719	0.170418	0.126558		9.425e-09	-0.111937	-0.235739	-1.77761	0.810403
9.45e-09	0.631713	0.337782	0.173011	0.136943		9.45e-09	1.04395	-1.378	-0.0921728	-0.281316
9.475e-09	0.605192	0.339707	0.166909	0.132719		9.475e-09	0.452172	0.678247	0.18172	-1.63941
9.5e-09	0.64187	0.335216	0.171944	0.12955		9.5e-09	-0.949795	2.81567	0.425509	-2.24991
9.525e-09	0.62466	0.332649	0.161416	0.129374		9.525e-09	-0.811022	0.673105	-2.02424	-0.172216
9.55e-09	0.611681	0.336884	0.175758	0.12955		9.55e-09	-0.35567	1.16827	0.457911	-0.817091
9.575e-09	0.642435	0.324435	0.161416	0.133423		9.575e-09	0.488682	-1.13705	-1.30406	-0.905148
9.6e-09	0.638767	0.331365	0.160501	0.127438		9.6e-09	0.310292	1.40966	-0.486686	0.358903
9.625e-09	0.630585	0.334446	0.161264	0.130254		9.625e-09	-1.03797	-1.18094	-1.34354	-0.555125
9.65e-09	0.622403	0.310318	0.159891	0.13043		9.65e-09	1.12091	1.22293	1.24705	-0.214248
9.675e-09	0.618735	0.318018	0.166756	0.12867		9.675e-09	0.408184	0.989867	-0.89565	-0.0384441
9.7e-09	0.59701	0.321484	0.163095	0.133599		9.7e-09	-1.16221	-1.18778	0.968685	-1.69087
9.725e-09	0.617042	0.328799	0.160806	0.132895		9.725e-09	-0.31311	0.165636	1.3038	-1.01865
9.75e-09	0.595881	0.322895	0.157144	0.128318		9.75e-09	-1.39159	-0.199252	-1.12934	-2.34666
9.775e-09	0.599549	0.312372	0.162332	0.127438		9.775e-09	-0.935297	-1.09928	-1.63069	0.163439
9.8e-09	0.615631	0.319687	0.163857	0.130254		9.8e-09	-0.621678	0.538305	0.0263588	0.337771
9.825e-09	0.588264	0.313142	0.160043	0.126206		9.825e-09	-0.271752	0.805844	-0.87852	0.948014
9.85e-09	0.611399	0.298255	0.149364	0.130959		9.85e-09	-1.75694	0.129843	-0.331054	-0.153987
9.875e-09	0.618735	0.304415	0.170876	0.133247		9.875e-09	-0.182859	1.06075	0.186811	0.389092
9.9e-09	0.597574	0.306596	0.162789	0.125678		9.9e-09	-0.156864	-0.642099	1.39017	1.40582
9.925e-09	0.62466	0.306853	0.156076	0.124974		9.925e-09	0.628808	-0.0177991	0.105469	1.85148
9.95e-09	0.614221	0.297356	0.154703	0.126734		9.95e-09	-1.04828	0.788085	-1.05944	-1.83057
9.975e-09	0.611117	0.316863	0.155771	0.126382		9.975e-09	-0.0807869	-1.15739	-1.54135	1.01702
1e-08	0.584314	0.305955	0.153635	0.126382		1e-08	-1.03875	-0.171658	0.416899	0.681411
1.0025e-08	0.615067	0.297998	0.15806	0.123566		1.0025e-08	-0.688894	1.53971	-0.724563	-0.608868
1.005e-08	0.590239	0.282084	0.156687	0.114941		1.005e-08	-1.43383	1.41934	-0.550997	0.276768
1.0075e-08	0.594189	0.30634	0.151347	0.122158		1.0075e-08	0.195121	1.21999	-1.95165	0.0722442
1.01e-08	0.609142	0.302361	0.153941	0.114061		1.01e-08	-1.50464	-0.901838	-1.1187	-1.29641
1.0125e-08	0.615349	0.293763	0.154551	0.123742		1.0125e-08	-0.531716	-1.13312	-1.4838	0.0705553
1.015e-08	0.598139	0.312372	0.148601	0.121101		1.015e-08	0.333946	-0.115138	-0.363169	1.30463
1.0175e-08	0.603499	0.293763	0.152567	0.117229		1.0175e-08	-1.33875	0.958239	0.126986	1.78629
1.02e-08	0.583749	0.292864	0.155009	0.120573		1.02e-08	-1.65269	-0.971493	0.650202	-0.451502
1.0225e-08	0.625224	0.287731	0.158975	0.121806		1.0225e-08	-0.711778	0.679274	0.538424	-0.696654
1.025e-08	0.619299	0.292993	0.144329	0.114941		1.025e-08	-1.76725	0.0526424	-1.61405	0.369894
1.0275e-08	0.594189	0.288244	0.150584	0.113885		1.0275e-08	0.324876	0.815758	1.30104	-0.360816
1.03e-08	0.585724	0.291838	0.149821	0.122158		1.03e-08	0.00900976	-1.1572	-0.507445	1.92216
1.0325e-08	0.607731	0.277721	0.156687	0.130078		1.0325e-08	1.17977	0.791507	1.29694	0.599635
1.035e-08	0.590239	0.295816	0.148448	0.117581		1.035e-08	1.57128	-1.55953	0.122714	-0.55397
1.0375e-08	0.582903	0.290298	0.143261	0.119341		1.0375e-08	-1.0231	-0.0821936	-0.991707	0.588521
1.04e-08	0.575003	0.291196	0.148296	0.125854		1.04e-08	0.412408	-0.455666	-0.178392	-1.26811
1.0425e-08	0.618453	0.284394	0.137158	0.113533		1.0425e-08	0.91594	0.443782	-0.362493	-0.508318
1.045e-08	0.582057	0.295046	0.144939	0.114941		1.045e-08	-1.84391	0.122373	0.647838	1.62
1.0475e-08	0.573874	0.287731	0.142345	0.118637		1.0475e-08	-1.26815	-1.0267	0.0105092	-0.561407
1.05e-08	0.575567	0.285421	0.143566	0.120573		1.05e-08	-1.70768	-1.27299	-0.27306	-0.255029
1.0525e-08	0.616196	0.273101	0.144329	0.116701		1.0525e-08	0.0381839	-0.611917	1.77985	-0.652574
1.055e-08	0.59701	0.288629	0.139752	0.111948		1.055e-08	1.86479	-1.66349	-0.0646567	-0.170386
1.0575e-08	0.584878	0.275667	0.14204	0.103499		1.0575e-08	1.04795	-0.143861	0.299726	0.418795
1.06e-08	0.603217	0.27002	0.138531	0.113357		1.06e-08	1.06181	-0.393312	-0.444957	-0.936953
1.0625e-08	0.571899	0.270277	0.138074	0.118285		1.0625e-08	0.202066	1.53643	1.78269	0.857257
1.065e-08	0.557228	0.282982	0.133191	0.108076		1.065e-08	0.518121	0.182576	0.0547177	0.917277
1.0675e-08	0.602653	0.277592	0.138836	0.107548		1.0675e-08	0.644468	-0.230821	-0.498401	-2.04596
1.07e-08	0.579517	0.281827	0.142345	0.114413		1.07e-08	-0.297522	-1.34952	-1.64524	-0.922454
1.0725e-08	0.592496	0.276694	0.134564	0.109484		1.0725e-08	0.820865	0.237833	-1.94061	0.0615944
1.075e-08	0.578953	0.275796	0.145549	0.107724		1.075e-08	-0.967244	-0.477873	0.136354	-0.131253
1.0775e-08	0.583467	0.276951	0.136243	0.107724		1.0775e-08	0.574355	0.543743	1.19574	-0.0747863
1.08e-08	0.554125	0.268609	0.133191	0.101035		1.08e-08	-1.91271	-0.202729	0.537701	0.124658
1.0825e-08	0.576696	0.272716	0.134564	0.119165		1.0825e-08	3.09385	-1.11615	1.03664	-1.75927
1.085e-08	0.567667	0.26771	0.133954	0.115293		1.085e-08	-1.32505	-1.26784	0.209063	1.78321
1.0875e-08	0.577824	0.265529	0.134107	0.112829		1.0875e-08	0.725913	1.45447	-0.0564591	1.44468
1.09e-08	0.562589	0.267325	0.134259	0.10614		1.09e-08	1.15948	1.38811	-2.05488	-2.32464
1.0925e-08	0.565128	0.26925	0.144329	0.105612		1.0925e-08	-0.806768	0.387115	-0.190811	0.257173
1.095e-08	0.585442	0.260652	0.137006	0.102619		1.095e-08	-0.568811	-0.314916	-0.893643	0.710323
1.0975e-08	0.56795	0.266299	0.145092	0.110892		1.0975e-08	0.563088	1.18545	-0.862972	0.112504
1.1e-08	0.582339	0.266555	0.139447	0.110892		1.1e-08	-0.87021	0.425979	0.776316	-1.0692
1.1025e-08	0.565692	0.26463	0.1367	0.110892		1.1025e-08	-0.63272	0.603574	-0.534552	0.183055
1.105e-08	0.574721	0.26386	0.135327	0.105964		1.105e-08	-0.824476	-0.770483	0.302143	1.65748
1.1075e-08	0.576414	0.265272	0.132581	0.11142		1.1075e-08	-0.235302	0.347828	0.164041	0.945387
1.11e-08	0.571899	0.259754	0.132276	0.100683		1.11e-08	-0.232132	-0.226316	-1.99959	0.66941
1.1125e-08	0.544814	0.261679	0.135938	0.107196		1.1125e-08	0.594505	1.5918	-0.892195	1.49109
1.115e-08	0.561178	0.256673	0.137158	0.102443		1.115e-08	0.519833	2.30003	0.252365	0.0404172
1.1175e-08	0.55356	0.270662	0.133344	0.105436		1.1175e-08	-1.16883	-0.174518	1.19693	-0.239255
1.12e-08	0.581774	0.25308	0.123427	0.102091		1.12e-08	-0.655854	-0.418982	-1.11631	1.24661
1.1225e-08	0.55356	0.256673	0.130598	0.105788		1.1225e-08	-0.53642	0.456481	-0.443802	0.303665
1.125e-08	0.55751	0.250128	0.137158	0.107196		1.125e-08	0.294665	-1.08044	-0.280786	1.01881
1.1275e-08	0.551585	0.258085	0.11885	0.11054		1.1275e-08	1.04863	-1.83574	-0.459179	1.25484
1.13e-08	0.559485	0.255647	0.128919	0.104028		1.13e-08	2.04244	-0.312427	1.92515	1.63922
1.1325e-08	0.5324	0.265272	0.128309	0.103852		1.1325e-08	-0.377909	-1.15495	-1.40157	-0.0163236
1.135e-08	0.560332	0.260395	0.132123	0.0999791		1.135e-08	0.138395	0.853895	-0.932619	0.998065
1.1375e-08	0.568514	0.250385	0.139294	0.102619		1.1375e-08	0.0980376	0.349331	1.4955	0.377664
1.14e-08	0.554407	0.25231	0.127852	0.102795		1.14e-08	-1.37975	-0.270652	-0.128785	0.873395
1.1425e-08	0.562025	0.242813	0.1248	0.103499		1.1425e-08	-1.02331	0.754488	0.860517	-0.981842
1.145e-08	0.537196	0.24538	0.127699	0.0996271		1.145e-08	-1.94741	-0.749502	-0.528981	-1.64654
1.1475e-08	0.549892	0.250898	0.138226	0.0957546		1.1475e-08	0.133231	-0.378027	-0.678746	-0.852927
1.15e-08	0.555253	0.248717	0.121291	0.102443		1.15e-08	0.131118	0.993163	0.694118	-1.22027
1.1525e-08	0.547353	0.242685	0.133649	0.1079		1.1525e-08	-0.917557	-0.862815	0.752803	-0.424513
1.155e-08	0.530989	0.243455	0.128614	0.0945225		1.155e-08	-1.40587	-0.0334597	0.776342	-2.07296
1.1575e-08	0.53776	0.246663	0.131513	0.0999791		1.1575e-08	-2.29972	-0.320763	-0.279175	-0.598581
1.16e-08	0.546225	0.248075	0.125716	0.100155		1.16e-08	-1.57991	-1.61517	-1.05967	1.25753
1.1625e-08	0.577542	0.25077	0.115188	0.0980429		1.1625e-08	-0.817666	-2.97176	-0.0279409	0.132152
1.165e-08	0.540018	0.233188	0.122359	0.0982189		1.165e-08	-1.55346	1.80723	1.14663	-0.504699
1.1675e-08	0.53776	0.251412	0.127546	0.0934664		1.1675e-08	-1.64203	-1.54116	-0.511561	0.183708
1.17e-08	0.547353	0.244225	0.125105	0.100683		1.17e-08	-0.266995	1.89592	1.01615	0.000289036
1.1725e-08	0.572746	0.246792	0.123427	0.0952266		1.1725e-08	-1.29131	2.04126	-0.577947	1.29974
1.175e-08	0.53635	0.23845	0.129682	0.0966347		1.175e-08	-2.97195	-0.018829	0.566611	-0.788624
1.1775e-08	0.548764	0.239861	0.121444	0.0946985		1.1775e-08	-0.368068	-1.53411	-0.118143	1.58125
1.18e-08	0.532964	0.233958	0.12358	0.0971628		1.18e-08	0.238189	1.04978	-0.982078	-0.59064
1.1825e-08	0.568514	0.235755	0.128004	0.100507		1.1825e-08	-0.629533	-2.5694	-0.647363	-0.434463
1.185e-08	0.542557	0.232674	0.120833	0.0910021		1.185e-08	-0.392002	-0.768397	1.03335	2.55907
1.1875e-08	0.512086	0.24076	0.117782	0.0982189		1.1875e-08	-1.55171	-1.27296	-2.59986	-1.12008
1.19e-08	0.556946	0.220996	0.11824	0.0996271		1.19e-08	-0.32725	-0.109284	0.183451	-0.811047
1.1925e-08	0.551585	0.237166	0.117935	0.0983949		1.1925e-08	0.405929	-0.673672	-0.510647	-1.3872
1.195e-08	0.54961	0.238706	0.120376	0.0973388		1.195e-08	-2.49301	1.49368	-0.601548	-1.96538
1.1975e-08	0.526193	0.231519	0.129682	0.0917062		1.1975e-08	-0.934264	-0.601785	0.0562189	-0.227478
1.2e-08	0.52845	0.228568	0.120986	0.0929383		1.2e-08	1.41583	-0.551699	0.143764	-0.380775
1.2025e-08	0.52845	0.221766	0.123274	0.090298		1.2025e-08	0.287856	0.886274	0.0162822	-0.341258
1.205e-08	0.540018	0.229466	0.118697	0.098747		1.205e-08	-0.927072	0.375476	-0.29137	-0.884309
1.2075e-08	0.511803	0.23383	0.120071	0.0966347		1.2075e-08	-2.7702	0.366268	-0.851768	-0.962957
1.21e-08	0.544532	0.230749	0.114883	0.0950506		1.21e-08	-0.451958	0.772139	-0.479318	1.17693
1.2125e-08	0.52845	0.220482	0.120833	0.0887139		1.2125e-08	0.287068	0.792465	-0.0339812	-0.186145
1.215e-08	0.527039	0.238578	0.117019	0.102619		1.215e-08	0.526531	-0.587009	0.448557	-1.98313
1.2175e-08	0.545378	0.220482	0.112137	0.0855455		1.2175e-08	-3.12648	0.235967	0.968489	0.203362
1.22e-08	0.518857	0.225103	0.113663	0.089946		1.22e-08	0.629678	-0.103803	1.01939	-1.87311
1.2225e-08	0.525628	0.228054	0.114883	0.0908261		1.2225e-08	0.702052	-1.58214	0.45404	0.476524
1.225e-08	0.531553	0.229466	0.119003	0.0985709		1.225e-08	0.521956	-0.00876699	0.830144	-1.528
1.2275e-08	0.526475	0.216889	0.121139	0.0957546		1.2275e-08	-0.206559	0.24821	-0.283482	1.02512
1.23e-08	0.519986	0.223306	0.123427	0.0941705		1.23e-08	-0.684623	0.324993	0.310059	-1.18257
1.2325e-08	0.527603	0.214579	0.111985	0.089946		1.2325e-08	0.609441	0.0702241	-0.918116	-1.42407
1.235e-08	0.532682	0.217402	0.110764	0.0894179		1.235e-08	1.52634	-0.00481469	-1.89478	2.44381
1.2375e-08	0.503621	0.219969	0.114883	0.0920582		1.2375e-08	-1.36681	0.463361	-0.204853	0.0293943
1.24e-08	0.520832	0.218301	0.115799	0.0934664		1.24e-08	1.11912	0.569653	0.72079	-0.0139646
1.2425e-08	0.538607	0.221766	0.110611	0.089946		1.2425e-08	1.06301	1.22157	-0.845548	1.09368
1.245e-08	0.498261	0.222793	0.110459	0.0911781		1.245e-08	0.49592	0.0842944	-0.726824	0.136861
1.2475e-08	0.523371	0.210986	0.109849	0.0917062		1.2475e-08	-0.541876	-0.783377	-0.571272	-1.61952
1.25e-08	0.524782	0.204697	0.108628	0.0883618		1.25e-08	1.14811	-0.131708	0.100275	-1.30783
1.2525e-08	0.537478	0.209317	0.109391	0.089594		1.2525e-08	0.663022	0.277425	0.884105	1.28085
1.255e-08	0.531835	0.216889	0.115799	0.0892419		1.255e-08	0.475707	0.0457253	0.85659	-0.522967
1.2575e-08	0.512368	0.214194	0.113663	0.0873057		1.2575e-08	-0.74123	0.455329	0.310269	1.553
1.26e-08	0.497696	0.210087	0.110917	0.0873057		1.26e-08	0.098418	0.130303	-0.497587	-0.81807
1.2625e-08	0.501646	0.214579	0.11351	0.0866016		1.2625e-08	1.02626	-0.748583	0.399972	1.10234
1.265e-08	0.502775	0.216761	0.11885	0.0822011		1.265e-08	-0.023728	1.16712	0.184339	0.775095
1.2675e-08	0.512932	0.213424	0.103746	0.0892419		1.2675e-08	-0.602712	1.54907	-0.926044	-1.12478
1.27e-08	0.495157	0.20136	0.1129	0.0874817		1.27e-08	1.27748	1.46933	-0.659855	-0.609274
1.2725e-08	0.515189	0.209959	0.108475	0.0924103		1.2725e-08	-1.16108	-0.742431	-1.51392	1.56439
1.275e-08	0.490925	0.216247	0.111069	0.0873057		1.275e-08	-0.965646	-0.0844259	-0.313181	0.384861
1.2775e-08	0.527886	0.205724	0.10756	0.080969		1.2775e-08	0.0105555	0.358166	-2.29429	-2.90623
1.28e-08	0.503339	0.206237	0.106645	0.0834333		1.28e-08	-1.96391	0.087752	-0.454066	0.246652
1.2825e-08	0.505879	0.207649	0.104661	0.0938184		1.2825e-08	-1.94383	0.468768	0.414118	-1.75423
1.285e-08	0.506443	0.208162	0.106797	0.0830812		1.285e-08	0.776348	-1.04856	-0.371542	2.34524
1.2875e-08	0.505879	0.210472	0.100542	0.0910021		1.2875e-08	-1.64257	-0.824763	-0.104345	-0.596659
1.29e-08	0.499671	0.203414	0.103593	0.0825532		1.29e-08	0.648702	-0.288198	-1.95065	-1.95502
1.2925e-08	0.536914	0.212911	0.113358	0.0881858		1.2925e-08	-0.94663	-0.688583	-0.437763	-0.332665
1.295e-08	0.502775	0.210087	0.102678	0.0804409		1.295e-08	0.563394	0.789277	-1.45749	1.04853
1.2975e-08	0.512932	0.211756	0.100847	0.081321		1.2975e-08	-1.25646	-0.835083	-0.887896	-0.437081
1.3e-08	0.519703	0.195329	0.119613	0.0890659		1.3e-08	-0.0945774	0.237773	0.480535	-1.2703
1.3025e-08	0.4771	0.198665	0.0996265	0.081321		1.3025e-08	1.11427	-1.55099	0.863712	0.196782
1.305e-08	0.500236	0.195329	0.104356	0.0851935		1.305e-08	-1.28645	1.03626	1.09522	-0.59754
1.3075e-08	0.5166	0.200205	0.106034	0.0816731		1.3075e-08	0.144063	-7.05409e-05	-1.30508	0.544061
1.31e-08	0.498825	0.202002	0.10634	0.0853695		1.31e-08	-2.08874	1.23695	0.145704	0.614731
1.3125e-08	0.510393	0.200334	0.103898	0.081145		1.3125e-08	0.494605	0.0703089	-1.88107	0.974933
1.315e-08	0.486975	0.200205	0.10817	0.0878338		1.315e-08	-1.30137	-1.89329	-0.00583004	0.424642
1.3175e-08	0.489232	0.193275	0.106187	0.0851935		1.3175e-08	0.136476	-0.622428	-0.197344	-0.334833
1.32e-08	0.490361	0.200462	0.099474	0.0829052		1.32e-08	-0.732357	0.174811	0.840092	-0.847437
1.3225e-08	0.514343	0.195714	0.100847	0.0871297		1.3225e-08	0.843448	-0.268818	0.764208	-0.0720588
1.325e-08	0.494029	0.192248	0.105882	0.0837853		1.325e-08	-2.92386	0.94561	-0.622734	0.871866
1.3275e-08	0.482743	0.196227	0.0977957	0.0846654		1.3275e-08	-0.767244	0.276981	0.726365	-0.309796
1.33e-08	0.517446	0.199564	0.101305	0.081321		1.33e-08	-0.794513	0.534335	0.61008	-0.575986
1.3325e-08	0.496286	0.199564	0.0964226	0.0785047		1.3325e-08	0.744068	1.11272	-0.0101802	1.41626
1.335e-08	0.479922	0.190452	0.102068	0.0853695		1.335e-08	-2.10489	0.63257	-1.02025	-0.608739
1.3375e-08	0.493464	0.1875	0.101	0.0786807		1.3375e-08	0.108863	-1.13613	0.60665	-1.3389
1.34e-08	0.488668	0.191478	0.10222	0.0823771		1.34e-08	2.41855	-0.655207	-0.367026	0.786202
1.3425e-08	0.481897	0.19058	0.105729	0.090474		1.3425e-08	-0.620623	0.214217	-0.175549	-0.070641
1.345e-08	0.470893	0.178645	0.101762	0.0802649		1.345e-08	-0.964632	0.0842025	-0.373685	-0.213705
1.3475e-08	0.499954	0.190965	0.102983	0.071992		1.3475e-08	1.30759	-0.888148	-0.611735	0.2756
1.35e-08	0.491489	0.193788	0.100389	0.081321		1.35e-08	-1.56594	-0.0485109	-1.32017	1.31538
1.3525e-08	0.492054	0.186473	0.100695	0.0776246		1.3525e-08	-1.41579	-2.09652	-1.60023	-0.139276
1.355e-08	0.474843	0.186602	0.0999317	0.0779767		1.355e-08	0.547164	-0.47674	0.315061	0.774986
1.3575e-08	0.487257	0.185832	0.106492	0.0788568		1.3575e-08	-0.525217	0.17052	-0.239152	-0.388145
1.36e-08	0.491207	0.196869	0.100542	0.0697037		1.36e-08	0.989479	-0.420099	-1.54268	-1.00229
1.3625e-08	0.495721	0.20213	0.0993214	0.0774486		1.3625e-08	1.87109	1.11064	0.0650127	1.82913
1.365e-08	0.484718	0.191992	0.0944392	0.0732241		1.365e-08	-0.662776	-0.78961	0.296354	0.150448
1.3675e-08	0.48895	0.183522	0.099474	0.080969		1.3675e-08	0.811918	0.843139	-0.0644453	0.216832
1.37e-08	0.478229	0.190708	0.0968803	0.0781527		1.37e-08	-0.359893	-0.669985	-1.21782	-0.528887
1.3725e-08	0.483589	0.185062	0.0976432	0.0866016		1.3725e-08	-1.76399	-0.774698	0.279979	-1.36256
1.375e-08	0.48895	0.181981	0.0965752	0.0774486		1.375e-08	-0.651955	-1.57149	-0.837171	0.0728306
1.3775e-08	0.482179	0.184163	0.0953547	0.0755124		1.3775e-08	-0.225465	-0.360035	2.01585	0.868064
1.38e-08	0.475125	0.187757	0.100695	0.0756884		1.38e-08	1.76421	0.161196	0.22068	0.332704
1.3825e-08	0.470893	0.186602	0.102525	0.0792088		1.3825e-08	2.97685	-0.0770517	-2.656	-0.333588
1.385e-08	0.482179	0.187372	0.0913879	0.0783287		1.385e-08	-0.322977	-1.64123	-0.552548	-0.312339
1.3875e-08	0.4692	0.186473	0.0944392	0.0753364		1.3875e-08	-1.83259	-1.31966	-1.68056	1.17633
1.39e-08	0.474279	0.173383	0.0981009	0.0735762		1.39e-08	0.0725867	-1.16343	-0.210454	-1.1347
1.3925e-08	0.450579	0.183137	0.0965752	0.0793848		1.3925e-08	-0.654384	0.224174	0.98314	0.616366
1.395e-08	0.472022	0.17672	0.0974906	0.0742803		1.395e-08	0.979359	1.64911	-0.308632	0.508333
1.3975e-08	0.470611	0.18211	0.092761	0.0693517		1.3975e-08	-1.97569	-1.29402	0.526028	-0.989199
1.4e-08	0.47315	0.178131	0.102068	0.0763925		1.4e-08	-0.0145613	0.600147	-0.247407	-0.882989
1.4025e-08	0.470611	0.183393	0.0887943	0.0711119		1.4025e-08	-0.793146	1.6292	0.347147	-0.602714
1.405e-08	0.452836	0.188655	0.0909302	0.0800889		1.405e-08	0.00973921	-0.557702	1.38708	-0.0604731
1.4075e-08	0.443525	0.173768	0.094897	0.0712879		1.4075e-08	1.09444	-0.266901	1.05515	-0.389946
1.41e-08	0.456786	0.179158	0.089252	0.0709359		1.41e-08	0.126533	-2.16141	-1.94988	0.459512
1.4125e-08	0.442115	0.179543	0.0935238	0.072344		1.4125e-08	0.465533	-0.660302	-1.03121	0.435785
1.415e-08	0.480486	0.181981	0.097338	0.0741042		1.415e-08	-0.459353	-1.38106	0.539478	-0.508544
1.4175e-08	0.473432	0.180826	0.094897	0.0732241		1.4175e-08	-1.80902	-0.313785	-2.27639	-0.314541
1.42e-08	0.473997	0.176463	0.094897	0.07164		1.42e-08	0.266052	0.722665	-0.784783	-1.96602
1.4225e-08	0.4613	0.170816	0.103441	0.0741042		1.4225e-08	-0.898549	0.135524	-0.47156	0.0304943
1.425e-08	0.462429	0.171073	0.0887943	0.0776246		1.425e-08	2.21901	0.86965	-0.321088	-0.788256
1.4275e-08	0.462993	0.175565	0.0887943	0.0749843		1.4275e-08	1.71354	-1.07939	-0.0478912	0.596954
1.43e-08	0.460454	0.169661	0.0866583	0.0772726		1.43e-08	1.2064	-0.686199	-0.552233	0.438955
1.4325e-08	0.470329	0.165554	0.088184	0.0704078		1.4325e-08	-0.910067	-1.62168	-0.894299	-0.649047
1.435e-08	0.45199	0.17672	0.089252	0.0688236		1.435e-08	-0.23886	-1.02401	-0.95016	-0.676759
1.4375e-08	0.472022	0.162731	0.0924559	0.0682956		1.4375e-08	0.102096	-0.869285	0.720573	-0.0835092
1.44e-08	0.466943	0.175308	0.0907776	0.0705838		1.44e-08	0.0640146	1.51144	-0.651172	-0.821798
1.4425e-08	0.450015	0.163244	0.091693	0.0758644		1.4425e-08	1.45191	-0.318982	0.735727	0.217531
1.445e-08	0.425186	0.166453	0.0929136	0.0707599		1.445e-08	-0.441318	-1.57126	0.185636	0.368433
1.4475e-08	0.468072	0.176078	0.092761	0.0725201		1.4475e-08	0.758605	-2.27727	1.28775	-1.30975
1.45e-08	0.4534	0.163501	0.0985586	0.0684716		1.45e-08	0.72045	0.527963	-0.58873	-1.38441
1.4525e-08	0.467225	0.171073	0.0878788	0.0686476		1.4525e-08	-0.560801	1.16764	0.473261	0.329952
1.455e-08	0.460736	0.170303	0.0945918	0.0742803		1.455e-08	-0.170649	0.668565	-2.4069	2.27266
1.4575e-08	0.446911	0.177875	0.0884891	0.0658313		1.4575e-08	-0.594412	0.340617	0.609229	-0.893631
1.46e-08	0.44014	0.170688	0.0895571	0.0698798		1.46e-08	-0.635605	1.74411	0.926937	-1.68795
1.4625e-08	0.461018	0.168506	0.0866583	0.072168		1.4625e-08	-1.01343	-1.42972	1.07854	0.214287
1.465e-08	0.465532	0.172741	0.0898622	0.0707599		1.465e-08	0.965275	-0.372715	0.311762	1.7612
1.4675e-08	0.445783	0.168121	0.087116	0.0675915		1.4675e-08	-1.14618	1.45309	0.922568	0.335338
1.47e-08	0.453965	0.162218	0.0863532	0.0755124		1.47e-08	-0.465235	-0.690151	-0.0143868	-0.688069
1.4725e-08	0.443808	0.156057	0.0845224	0.071992		1.4725e-08	2.68106	-0.67541	0.890779	-1.12653
1.475e-08	0.452836	0.161191	0.0854378	0.0660073		1.475e-08	0.22424	-0.24142	-0.301312	-2.29103
1.4775e-08	0.450861	0.159138	0.0880314	0.0744563		1.4775e-08	0.376207	0.263453	-1.07658	-0.91948
1.48e-08	0.454811	0.162218	0.0889468	0.0677675		1.48e-08	-1.21773	-1.54525	1.42995	0.818752
1.4825e-08	0.442115	0.164271	0.0811659	0.0681196		1.4825e-08	0.38918	-0.549923	-0.231151	0.196955
1.485e-08	0.440704	0.160036	0.0839121	0.0753364		1.485e-08	-0.868984	-1.41619	-0.588181	0.666021
1.4875e-08	0.434215	0.166068	0.0781145	0.0670634		1.4875e-08	-1.01068	-0.347812	-2.00341	0.224329
1.49e-08	0.434497	0.159908	0.0805556	0.0702318		1.49e-08	-0.519035	2.9108	-0.501294	-0.17304
1.4925e-08	0.443808	0.157084	0.0848275	0.0649512		1.4925e-08	-1.44205	-1.02858	-0.309503	0.754123
1.495e-08	0.437883	0.157341	0.0833018	0.0705838		1.495e-08	-0.754393	0.822983	1.41109	0.813875
1.4975e-08	0.451707	0.154902	0.0851326	0.0711119		1.4975e-08	-1.97419	1.51038	0.372722	-0.318202
1.5e-08	0.46779	0.155801	0.0889468	0.0677675		1.5e-08	0.331669	0.673433	-1.39257	0.244692
1.5025e-08	0.457068	0.165169	0.0796402	0.0711119		1.5025e-08	-2.26464	0.508842	-1.03142	-0.845775
1.505e-08	0.4297	0.157854	0.0800979	0.072168		1.505e-08	0.832697	1.26875	0.0134641	-0.190608
1.5075e-08	0.452272	0.150539	0.0877263	0.0682956		1.5075e-08	-0.392415	1.85229	-0.00780643	0.972972
1.51e-08	0.430547	0.157212	0.0886417	0.0624869		1.51e-08	0.152891	0.00980144	1.08365	0.8474
1.5125e-08	0.451707	0.153619	0.0887943	0.0640711		1.5125e-08	-0.385943	-0.765844	-0.179769	0.0282385
1.515e-08	0.45594	0.155672	0.0793351	0.0681196		1.515e-08	1.64256	-0.64889	-0.802923	1.19625
1.5175e-08	0.439011	0.153747	0.0854378	0.0702318		1.5175e-08	1.45028	-0.209062	-1.25599	-0.5978
1.52e-08	0.42829	0.156442	0.0819287	0.0635431		1.52e-08	-0.327628	-0.0554056	0.786072	-0.541157
1.5225e-08	0.440986	0.150667	0.0791825	0.0656553		1.5225e-08	-0.275337	0.781691	0.76459	-0.902631
1.525e-08	0.433933	0.152464	0.087116	0.0665354		1.525e-08	-1.81226	-0.50396	-0.422598	-0.800174
1.5275e-08	0.451143	0.149512	0.0807082	0.0638951		1.5275e-08	0.326195	1.9211	-0.532837	0.373519
1.53e-08	0.452272	0.148357	0.0828441	0.0700558		1.53e-08	0.727337	0.668616	-1.16304	0.803849
1.5325e-08	0.448322	0.152207	0.080403	0.0644232		1.5325e-08	0.331634	-1.20284	0.198337	0.674687
1.535e-08	0.413901	0.157598	0.0802505	0.0601987		1.535e-08	0.983009	1.8104	1.5198	-0.998107
1.5375e-08	0.438165	0.147074	0.0845224	0.0672395		1.5375e-08	-1.01318	-0.42817	-1.10984	0.929821
1.54e-08	0.441268	0.148101	0.0776568	0.0660073		1.54e-08	-0.262037	0.233053	-0.222047	-0.981767
1.5425e-08	0.422929	0.150411	0.0839121	0.0572064		1.5425e-08	-0.661652	-0.122727	-1.59784	0.0590531
1.545e-08	0.434215	0.150026	0.0822339	0.0609028		1.545e-08	-0.460304	0.394766	0.469523	0.0683102
1.5475e-08	0.43224	0.147074	0.0820813	0.0677675		1.5475e-08	0.495031	0.0377115	-1.43376	0.783444
1.55e-08	0.439293	0.156314	0.0796402	0.0675915		1.55e-08	0.0440051	1.39685	-0.979857	0.36906
1.5525e-08	0.431675	0.146304	0.0794876	0.0614308		1.5525e-08	0.800506	0.85645	-1.97081	0.519636
1.555e-08	0.431958	0.141555	0.0776568	0.0619589		1.555e-08	0.650844	-1.11533	0.193958	-0.369279
1.5575e-08	0.421236	0.152977	0.0730798	0.0607267		1.5575e-08	0.147068	0.907584	-0.622923	-0.8349
1.56e-08	0.42039	0.146689	0.0813184	0.0688236		1.56e-08	1.51279	0.620358	-1.09031	-1.34931
1.5625e-08	0.441268	0.14348	0.0721644	0.0670634		1.5625e-08	-1.77624	-0.256904	2.09689	-1.1536
1.565e-08	0.421518	0.153106	0.0807082	0.072344		1.565e-08	0.401408	0.337685	-1.67649	-1.29003
1.5675e-08	0.43365	0.150411	0.0782671	0.0674155		1.5675e-08	-0.359645	2.26289	-0.248447	-0.665885
1.57e-08	0.414747	0.155159	0.0807082	0.0660073		1.57e-08	0.605334	0.126613	0.166082	0.72179
1.5725e-08	0.422929	0.146432	0.0793351	0.0580865		1.5725e-08	-0.412173	-0.757279	-0.702781	-1.36844
1.575e-08	0.416158	0.141812	0.0831493	0.0684716		1.575e-08	0.707705	-0.235075	0.510017	-1.74529
1.5775e-08	0.423776	0.142839	0.0752158	0.0681196		1.5775e-08	0.14647	-0.231616	-0.938557	-0.832392
1.58e-08	0.40854	0.143737	0.0746055	0.0586145		1.58e-08	-0.467518	-0.154165	0.854645	-2.11968
1.5825e-08	0.424058	0.148742	0.0807082	0.0593186		1.5825e-08	0.860521	0.705214	0.0699664	-0.246601
1.585e-08	0.422647	0.142967	0.081471	0.0623109		1.585e-08	0.143063	-0.745432	2.58221	-0.480866
1.5875e-08	0.422083	0.140529	0.0823864	0.0649512		1.5875e-08	-1.0379	0.749995	-1.32771	1.63919
1.59e-08	0.405436	0.142582	0.0800979	0.0624869		1.59e-08	-0.784247	-0.368555	0.518528	2.41711
1.5925e-08	0.40854	0.138475	0.0736901	0.0614308		1.5925e-08	-1.04419	-1.19085	-0.540038	-0.513499
1.595e-08	0.407694	0.143352	0.0778094	0.063367		1.595e-08	-0.481247	0.00982977	-1.78088	-0.605101
1.5975e-08	0.413618	0.146946	0.0775043	0.0614308		1.5975e-08	0.237596	-0.626914	-3.33941	0.317445
1.6e-08	0.417286	0.145406	0.0791825	0.0549181		1.6e-08	-1.57082	1.32982	0.670577	-1.90223
1.6025e-08	0.409951	0.134369	0.0781145	0.0563263		1.6025e-08	1.78347	-0.550776	1.81079	-0.688819
1.605e-08	0.40064	0.137064	0.0706387	0.0605507		1.605e-08	0.282415	-1.494	0.880868	-1.17002
1.6075e-08	0.401769	0.137705	0.0782671	0.0582625		1.6075e-08	1.36766	-0.475676	-0.322515	-1.45843
1.61e-08	0.398947	0.142967	0.0762837	0.0674155		1.61e-08	-0.864283	-0.13572	-2.11667	0.975236
1.6125e-08	0.427161	0.1404	0.0791825	0.0605507		1.6125e-08	1.93586	-1.31056	-1.56314	1.51621
1.615e-08	0.40854	0.139374	0.0765889	0.0591426		1.615e-08	-0.925274	-0.591769	-1.00827	1.2297
1.6175e-08	0.42039	0.135909	0.0730798	0.0598466		1.6175e-08	2.71473	-0.0230618	-1.58612	-0.180346
1.62e-08	0.413336	0.139374	0.0788774	0.0549181		1.62e-08	-0.361409	-1.2033	-0.394153	-1.20315
1.6225e-08	0.412772	0.145662	0.0752158	0.0550941		1.6225e-08	-0.626716	0.35651	0.027576	-1.29893
1.625e-08	0.401486	0.139502	0.0672822	0.0575584		1.625e-08	-0.0566528	0.584818	0.541263	0.515873
1.6275e-08	0.417568	0.13501	0.0750632	0.0584385		1.6275e-08	-0.165672	0.660535	0.599994	0.814106
1.63e-08	0.414465	0.13039	0.0649937	0.063015		1.63e-08	0.0391959	-0.105858	0.338957	-0.655704
1.6325e-08	0.409104	0.137834	0.0736901	0.0589665		1.6325e-08	-0.542541	-0.606486	-0.700314	0.625129
1.635e-08	0.400076	0.136422	0.0755209	0.0612548		1.635e-08	-0.127875	0.196105	0.134627	1.51504
1.6375e-08	0.424904	0.141812	0.0678925	0.0614308		1.6375e-08	-1.39528	-0.920934	-1.18307	0.730369
1.64e-08	0.40064	0.138604	0.0752158	0.0649512		1.64e-08	-1.24417	-0.309317	-0.163235	1.77056
1.6425e-08	0.403179	0.129748	0.0761312	0.0549181		1.6425e-08	-0.249185	-1.16077	0.491447	-1.19142
1.645e-08	0.398665	0.134369	0.0791825	0.0545661		1.645e-08	0.378637	1.34327	-0.78536	0.541798
1.6475e-08	0.399229	0.132444	0.0709439	0.0610788		1.6475e-08	1.48359	1.57363	0.469026	0.742687
1.65e-08	0.40064	0.12808	0.0726221	0.053686		1.65e-08	-1.06056	0.759187	0.0651871	-1.83542
1.6525e-08	0.395279	0.136422	0.0677399	0.0603747		1.6525e-08	1.84655	0.25216	-1.31034	-0.246085
1.655e-08	0.397536	0.12808	0.0732324	0.0533339		1.655e-08	0.516335	-0.489584	-0.0987324	0.700226
1.6575e-08	0.389072	0.123332	0.0755209	0.0584385		1.6575e-08	-0.126814	0.476704	0.281904	0.801802
1.66e-08	0.406565	0.134369	0.0695708	0.0621349		1.66e-08	-0.878089	0.00510747	1.35918	0.254993
1.6625e-08	0.421236	0.134754	0.0732324	0.0579104		1.6625e-08	-1.6846	0.818444	1.18498	0.156172
1.665e-08	0.41644	0.126027	0.0750632	0.0616068		1.665e-08	-0.200537	-0.591306	-1.08276	0.907136
1.6675e-08	0.386815	0.133342	0.0788774	0.0612548		1.6675e-08	0.166043	1.90424	-1.72657	1.1091
1.67e-08	0.392176	0.130775	0.0704862	0.0614308		1.67e-08	0.586871	0.961515	1.63815	-1.29558
1.6725e-08	0.413054	0.130775	0.0691131	0.0554462		1.6725e-08	1.6508	-1.86598	-0.871809	1.11257
1.675e-08	0.411926	0.13116	0.070181	0.0623109		1.675e-08	1.05609	-0.540152	-1.09762	1.2648
1.6775e-08	0.408258	0.125898	0.0698759	0.0559742		1.6775e-08	-0.505994	-1.05879	-0.481622	0.108718
1.68e-08	0.406283	0.129107	0.0681976	0.0572064		1.68e-08	-2.12585	0.231851	-0.661155	0.309996
1.6825e-08	0.399511	0.134625	0.0710964	0.0572064		1.6825e-08	-0.630537	0.461294	-0.372016	0.965651
1.685e-08	0.379479	0.120893	0.0657566	0.0580865		1.685e-08	-0.262493	-1.83574	0.105679	0.764023
1.6875e-08	0.386815	0.124102	0.0720118	0.0582625		1.6875e-08	-0.217149	-0.027484	-2.00372	0.00538519
1.69e-08	0.401486	0.127567	0.0659091	0.054214		1.69e-08	-0.171795	-0.906655	-0.160726	-1.61619
1.6925e-08	0.396972	0.131802	0.0672822	0.053686		1.6925e-08	0.251905	0.273318	-2.27619	0.611725
1.695e-08	0.382019	0.127823	0.0698759	0.0593186		1.695e-08	-0.405732	0.940283	-1.65727	-0.45492
1.6975e-08	0.386533	0.13039	0.0685028	0.0580865		1.6975e-08	0.397731	-0.22011	0.192946	1.62728
1.7e-08	0.390765	0.119225	0.0739952	0.0591426		1.7e-08	2.6134	-0.109933	-0.509911	-0.20459
1.7025e-08	0.396408	0.126797	0.0700285	0.0586145		1.7025e-08	-0.108197	-0.478269	-0.408616	1.32215
1.705e-08	0.393304	0.123588	0.0703336	0.0557982		1.705e-08	-1.74907	0.589451	0.832361	-1.07641
1.7075e-08	0.394433	0.127695	0.0686554	0.0552701		1.7075e-08	-0.345147	0.460327	0.507254	-0.466941
1.71e-08	0.394151	0.120123	0.0703336	0.0550941		1.71e-08	-0.627826	0.731002	0.0383044	-1.39067
1.7125e-08	0.385969	0.111653	0.0651463	0.0529819		1.7125e-08	0.889797	0.240415	0.14004	1.42192
1.715e-08	0.404026	0.120123	0.0663668	0.0477013		1.715e-08	-0.321258	-1.45626	-0.760436	0.959526
1.7175e-08	0.40854	0.117428	0.0672822	0.0557982		1.7175e-08	0.106009	-1.71033	-0.611905	0.855282
1.72e-08	0.385687	0.132829	0.0685028	0.0547421		1.72e-08	0.0412011	1.29619	-0.0802848	0.802069
1.7225e-08	0.397254	0.123588	0.0659091	0.0594946		1.7225e-08	0.743941	0.440067	0.260872	-1.87648
1.725e-08	0.369604	0.123075	0.0756735	0.0621349		1.725e-08	-0.473738	-0.459122	-0.0689951	0.797807
1.7275e-08	0.380044	0.117428	0.0651463	0.0570303		1.7275e-08	-0.8149	-0.350319	1.18532	0.588952
1.73e-08	0.41249	0.113706	0.0685028	0.0552701		1.73e-08	0.659456	-0.605954	0.229996	0.689343
1.7325e-08	0.398101	0.127567	0.0630104	0.0510457		1.7325e-08	-1.00424	-1.79515	0.668702	-2.36557
1.735e-08	0.396408	0.119225	0.0671297	0.0529819		1.735e-08	1.4664	-0.226915	0.867237	-1.07773
1.7375e-08	0.378069	0.122818	0.0704862	0.0589665		1.7375e-08	0.130875	-0.931402	0.29358	-0.357231
1.74e-08	0.396126	0.118583	0.0717067	0.0535099		1.74e-08	-0.322963	-1.88229	0.201805	-0.465764
1.7425e-08	0.40064	0.116145	0.0659091	0.0552701		1.7425e-08	1.21572	0.099635	-1.68143	-0.83458
1.745e-08	0.398101	0.116145	0.0616372	0.0471732		1.745e-08	0.81735	-0.036178	1.22897	0.825452
1.7475e-08	0.362833	0.11499	0.0683502	0.0515737		1.7475e-08	0.0292722	-1.44004	0.603784	0.24861
1.75e-08	0.382583	0.114091	0.0671297	0.0610788		1.75e-08	0.350759	-0.350606	-1.62682	0.609334
1.7525e-08	0.394151	0.116401	0.0643835	0.05439		1.7525e-08	-0.0506083	-1.84142	-0.846679	-0.387531
1.755e-08	0.378069	0.122433	0.0624001	0.05439		1.755e-08	-0.118831	-0.380664	-0.357087	-0.0794259
1.7575e-08	0.383429	0.112423	0.0675874	0.05439		1.7575e-08	0.705151	-1.99958	-0.0615753	-1.13235
1.76e-08	0.371015	0.124358	0.0697233	0.0568543		1.76e-08	-0.0328346	-1.4824	-0.351582	0.328812
1.7625e-08	0.371015	0.113835	0.0688079	0.0533339		1.7625e-08	-0.101695	-0.386809	-0.0556175	0.848476
1.765e-08	0.375247	0.119995	0.0678925	0.0521018		1.765e-08	-0.842632	-0.196555	0.828572	-2.46775
1.7675e-08	0.386815	0.115888	0.0706387	0.0593186		1.7675e-08	-0.240187	-0.750023	-0.246208	-1.10841
1.77e-08	0.380608	0.10883	0.0575179	0.0528059		1.77e-08	-0.0292286	0.764676	-0.440218	0.412247
1.7725e-08	0.361422	0.109856	0.0652989	0.0503416		1.7725e-08	-0.660699	-0.245357	0.888839	0.248286
1.775e-08	0.369322	0.11576	0.0637732	0.0559742		1.775e-08	0.337527	1.5228	-0.288883	-1.765
1.7775e-08	0.357755	0.110241	0.0704862	0.0600227		1.7775e-08	1.22532	0.136299	-1.12488	0.130126
1.78e-08	0.384558	0.11653	0.071249	0.0554462		1.78e-08	1.15644	0.0776829	-0.2857	0.335276
1.7825e-08	0.383712	0.114476	0.0617898	0.0528059		1.7825e-08	-0.267726	-1.06512	0.160194	-0.67859
1.785e-08	0.397536	0.109985	0.0634681	0.0563263		1.785e-08	1.63948	-1.00083	-0.580073	-0.15577
1.7875e-08	0.382865	0.119738	0.0657566	0.044885		1.7875e-08	0.212248	1.73849	-0.926132	-0.00380172
1.79e-08	0.375247	0.116016	0.0672822	0.0521018		1.79e-08	1.21784	-0.369942	-0.380589	0.680528
1.7925e-08	0.365937	0.114091	0.0576705	0.0475253		1.7925e-08	1.94212	0.365726	-0.131674	-1.56362
1.795e-08	0.36509	0.116273	0.0613321	0.0601987		1.795e-08	0.964209	-1.20507	1.16173	-0.0262979
1.7975e-08	0.373837	0.110883	0.0624001	0.0494615		1.7975e-08	2.88378	-1.7297	-1.22517	0.286346
1.8e-08	0.375247	0.111653	0.0605693	0.05439		1.8e-08	2.81523	1.32118	-0.877172	2.31057
1.8025e-08	0.375812	0.115631	0.0631629	0.0559742		1.8025e-08	-0.274525	-1.51985	-0.32892	1.2881
1.805e-08	0.381737	0.110755	0.0669771	0.0478773		1.805e-08	0.793936	1.07486	-0.0792939	1.12052
1.8075e-08	0.361705	0.108701	0.0633155	0.0512217		1.8075e-08	0.60786	2.32413	-0.379522	-0.818532
1.81e-08	0.351265	0.103439	0.061027	0.0526298		1.81e-08	-0.15079	1.41852	1.57332	-0.505832
1.8125e-08	0.357755	0.10883	0.0596539	0.0473493		1.8125e-08	0.978499	0.213643	1.07351	0.184064
1.815e-08	0.389636	0.109086	0.0646886	0.0524538		1.815e-08	-1.44444	-0.867363	1.52641	0.660102
1.8175e-08	0.377504	0.106776	0.0625527	0.0506936		1.8175e-08	-0.141966	-0.16692	0.270935	1.29897
1.82e-08	0.358601	0.109728	0.0628578	0.0496375		1.82e-08	0.358899	1.47132	-0.987797	-0.328236
1.8225e-08	0.369604	0.108701	0.0634681	0.0487574		1.8225e-08	1.43622	0.685357	-2.65305	-0.391957
1.825e-08	0.336312	0.100103	0.0605693	0.0517497		1.825e-08	-0.479667	-0.0176955	0.774352	-0.672481
1.8275e-08	0.352958	0.110241	0.0608744	0.0582625		1.8275e-08	-0.266254	0.601377	-0.286934	2.35138
1.83e-08	0.342519	0.111781	0.0613321	0.0484054		1.83e-08	-0.11025	-0.917115	1.48203	0.282862
1.8325e-08	0.362551	0.106776	0.0569077	0.0461171		1.8325e-08	-0.243089	-0.469492	1.17838	2.50007
1.835e-08	0.367912	0.0974076	0.0633155	0.0471732		1.835e-08	0.723349	-0.49271	0.315927	1.45967
1.8375e-08	0.36114	0.10883	0.0613321	0.0568543		1.8375e-08	-0.220317	-0.344345	-0.75191	0.634427
1.84e-08	0.371297	0.0977926	0.0628578	0.0487574		1.84e-08	0.400141	0.449459	-0.754802	-0.847018
1.8425e-08	0.372708	0.10729	0.0614847	0.0519258		1.8425e-08	0.789641	-0.00372246	-0.605078	-0.258211
1.845e-08	0.361705	0.099461	0.0637732	0.0457651		1.845e-08	0.423984	1.87064	0.819145	-1.68984
1.8475e-08	0.346187	0.106134	0.059959	0.0464692		1.8475e-08	0.232007	-0.266464	-0.202813	1.5251
1.85e-08	0.348162	0.105878	0.0607218	0.0489334		1.85e-08	0.797184	-0.59333	-0.307771	0.968247
1.8525e-08	0.351265	0.107675	0.0601116	0.0438289		1.8525e-08	-0.328848	-0.704861	-0.873638	0.409864
1.855e-08	0.352394	0.101258	0.0648412	0.0524538		1.855e-08	0.353513	0.180342	-0.723997	-0.64418
1.8575e-08	0.360294	0.103568	0.061027	0.0461171		1.8575e-08	-0.542014	-1.14676	-2.77946	-0.766417
1.86e-08	0.359165	0.107675	0.0541614	0.0478773		1.86e-08	0.0243008	-0.347184	0.192065	-0.393759
1.8625e-08	0.353805	0.108701	0.0637732	0.0484054		1.8625e-08	-0.698033	-0.242211	0.445945	1.3572
1.865e-08	0.361422	0.105364	0.0627052	0.0468212		1.865e-08	-1.36344	0.0372989	0.648875	0.133254
1.8675e-08	0.345058	0.0997176	0.0584333	0.045061		1.8675e-08	0.437766	-1.21048	-0.0239552	-0.651841
1.87e-08	0.345623	0.104081	0.0555346	0.0478773		1.87e-08	-0.169196	-0.800632	-0.285732	0.551834
1.8725e-08	0.358037	0.101258	0.0570602	0.0480533		1.8725e-08	-1.01331	0.923309	0.95003	1.81362
1.875e-08	0.361422	0.106391	0.0538563	0.0473493		1.875e-08	0.440422	0.854544	-0.759967	0.0850043
1.8775e-08	0.338851	0.102413	0.0598064	0.0487574		1.8775e-08	1.42504	-0.531419	-0.765189	0.460947
1.88e-08	0.360576	0.103824	0.0608744	0.0521018		1.88e-08	0.342913	0.759526	-0.926199	-0.273638
1.8825e-08	0.359165	0.10806	0.0540089	0.0461171		1.8825e-08	1.3294	0.073308	-0.360889	-0.398217
1.885e-08	0.351547	0.100231	0.0590436	0.0480533		1.885e-08	1.0146	0.354528	-0.106246	-1.13585
1.8875e-08	0.35183	0.104851	0.0544666	0.0485814		1.8875e-08	-1.3771	1.20998	0.357095	1.30296
1.89e-08	0.351547	0.0997176	0.0601116	0.0478773		1.89e-08	-0.330086	0.697858	1.08203	0.230452
1.8925e-08	0.352958	0.101514	0.0540089	0.0436528		1.8925e-08	0.719283	-0.479423	-0.904484	0.21726
1.895e-08	0.355215	0.0950975	0.0584333	0.0441809		1.895e-08	-0.371832	-0.242275	0.499605	-0.91522
1.8975e-08	0.356908	0.105236	0.0540089	0.044709		1.8975e-08	-0.154565	2.30221	1.9593	1.8712
1.9e-08	0.340826	0.0992043	0.0576705	0.0505176		1.9e-08	0.421027	-1.54359	0.332688	1.01816
1.9025e-08	0.345623	0.0999743	0.0533986	0.0466452		1.9025e-08	-0.13708	0.51613	0.694295	-1.29716
1.905e-08	0.34393	0.103568	0.0566025	0.0473493		1.905e-08	0.0807544	1.2003	-0.0458246	0.261274
1.9075e-08	0.331798	0.0939425	0.0579756	0.0469972		1.9075e-08	0.538422	-0.433191	-1.05072	1.20405
1.91e-08	0.348726	0.0995893	0.0582808	0.0469972		1.91e-08	-0.861008	0.787009	-1.79509	0.796383
1.9125e-08	0.345058	0.0967659	0.0581282	0.0441809		1.9125e-08	-0.163557	-0.270382	0.356426	-0.797199
1.915e-08	0.349008	0.100616	0.0573654	0.0438289		1.915e-08	1.61677	1.4008	0.66678	-1.26486
1.9175e-08	0.332362	0.100103	0.0549243	0.0411886		1.9175e-08	1.77723	0.655036	-0.817935	0.0760514
1.92e-08	0.334901	0.0999743	0.0572128	0.0466452		1.92e-08	0.191801	-0.586726	-0.772847	-2.26034
1.9225e-08	0.340826	0.0984343	0.0526358	0.0461171		1.9225e-08	-0.734289	-1.65215	-0.780729	-1.93804
1.925e-08	0.332926	0.0933008	0.054314	0.0427728		1.925e-08	1.05318	1.24093	-1.21287	0.711798
1.9275e-08	0.344776	0.100359	0.0582808	0.0457651		1.9275e-08	0.427758	0.715515	-1.27475	0.697105
1.93e-08	0.344212	0.0984343	0.0526358	0.0459411		1.93e-08	0.103199	0.594668	1.85127	-2.21905
1.9325e-08	0.336876	0.0931725	0.059959	0.0438289		1.9325e-08	0.141116	0.0212904	-0.0162642	0.325398
1.935e-08	0.361705	0.0934291	0.0573654	0.0441809		1.935e-08	1.08844	0.487112	-0.982936	-0.146409
1.9375e-08	0.345623	0.0943275	0.0527883	0.0487574		1.9375e-08	-0.147292	-0.632071	0.234483	0.579407
1.94e-08	0.34393	0.0931725	0.0559923	0.0441809		1.94e-08	-0.656716	-1.02831	-0.520851	0.163764
1.9425e-08	0.33208	0.0988193	0.0521781	0.0438289		1.9425e-08	0.0493585	1.11875	0.646435	0.83426
1.945e-08	0.350701	0.0986909	0.0538563	0.0410126		1.945e-08	-0.400255	-0.231891	0.424824	0.761498
1.9475e-08	0.340544	0.0915041	0.0573654	0.0418927		1.9475e-08	1.64901	-1.40406	-1.13717	0.688445
1.95e-08	0.339133	0.0930441	0.0535512	0.0427728		1.95e-08	0.772632	-0.389932	0.784352	1.2467
1.9525e-08	0.344212	0.0966376	0.0521781	0.0406605		1.9525e-08	-0.105901	0.67229	-0.0293002	0.656324
1.955e-08	0.338569	0.0917608	0.054314	0.0469972		1.955e-08	0.114741	2.56033	0.391898	-0.568699
1.9575e-08	0.335748	0.0920174	0.0503473	0.044885		1.9575e-08	-1.25686	-0.630484	1.19087	0.450533
1.96e-08	0.33744	0.0924024	0.0523306	0.0466452		1.96e-08	0.741127	-0.390509	-2.26741	1.18357
1.9625e-08	0.327566	0.0915041	0.0512627	0.0420687		1.9625e-08	0.226432	-0.792909	0.149342	0.243299
1.965e-08	0.349855	0.0912474	0.0529409	0.0438289		1.965e-08	0.570977	-0.0929895	-0.130261	-2.26044
1.9675e-08	0.324462	0.089579	0.0549243	0.0371401		1.9675e-08	0.485504	-0.127965	-1.70917	1.5399
1.97e-08	0.328976	0.088424	0.0552294	0.0457651		1.97e-08	-0.58589	-0.946861	1.20425	0.0169447
1.9725e-08	0.321923	0.0854723	0.0552294	0.0469972		1.9725e-08	-0.426367	0.170667	2.66015	1.21747
1.975e-08	0.334337	0.0911191	0.0529409	0.0455891		1.975e-08	0.536042	-1.02017	0.101077	-0.948664
1.9775e-08	0.33349	0.0882957	0.0477536	0.0482294		1.9775e-08	-0.0448324	0.145998	-0.0722029	0.253217
1.98e-08	0.330387	0.0921458	0.0533986	0.0445329		1.98e-08	2.71449	1.17593	-1.71573	0.118523
1.9825e-08	0.326437	0.0915041	0.0529409	0.0477013		1.9825e-08	0.213962	-0.854284	-0.802014	-0.249795
1.985e-08	0.346751	0.0906057	0.054314	0.0499896		1.985e-08	-0.183562	-0.00922565	0.441122	-0.443999
1.9875e-08	0.315998	0.0897074	0.0460754	0.0401325		1.9875e-08	0.349313	-0.976564	-0.279435	0.179238
1.99e-08	0.31628	0.088039	0.0465331	0.0440049		1.99e-08	-0.981548	-0.781909	-0.509575	-1.0095
1.9925e-08	0.331798	0.0906057	0.055382	0.0427728		1.9925e-08	0.733903	1.09243	-0.849861	0.43424
1.995e-08	0.339415	0.088039	0.0521781	0.0480533		1.995e-08	0.147955	0.0289702	-1.24587	-0.0535526
1.9975e-08	0.314305	0.088039	0.0489741	0.0387243		1.9975e-08	1.86837	0.131777	-0.600093	-0.601282
2e-08	0.325308	0.0847022	0.0579756	0.0427728		2e-08	1.09482	0.00047781	-1.1619	-0.0926473
2.0025e-08	0.326437	0.0885523	0.0527883	0.0464692		2.0025e-08	-1.431	-0.318985	-0.514818	-0.583154
2.005e-08	0.314023	0.089579	0.047601	0.0411886		2.005e-08	-0.145044	-2.04809	0.849712	0.515357
2.0075e-08	0.342801	0.0909907	0.0465331	0.0418927		2.0075e-08	-1.0492	1.38951	0.231954	0.259996
2.01e-08	0.334901	0.088039	0.049737	0.0418927		2.01e-08	0.239847	0.316772	-0.111326	0.358146
2.0125e-08	0.326155	0.0858573	0.0500421	0.0491095		2.0125e-08	-0.666094	0.749425	-0.179125	2.34771
2.015e-08	0.340544	0.0841889	0.0582808	0.0396044		2.015e-08	-1.13408	0.00317966	0.250937	0.436518
2.0175e-08	0.320794	0.0834189	0.0457702	0.036084		2.0175e-08	1.22888	-0.886883	0.79276	-1.89379
2.02e-08	0.325873	0.0867556	0.0443971	0.0431248		2.02e-08	-0.372274	-1.73206	-0.273047	-0.43395
2.0225e-08	0.321358	0.0854723	0.0506524	0.0443569		2.0225e-08	1.61822	-1.06342	-0.0084868	-0.989582
2.025e-08	0.322769	0.0911191	0.0500421	0.0429488		2.025e-08	0.455703	0.887702	-0.299541	-1.66551
2.0275e-08	0.317691	0.0832905	0.0515678	0.0383723		2.0275e-08	0.744443	2.08357	-1.20388	-0.914895
2.03e-08	0.330105	0.0822638	0.0491267	0.0427728		2.03e-08	0.274236	2.04558	1.56829	2.33954
2.0325e-08	0.299634	0.0836755	0.0506524	0.0381962		2.0325e-08	-0.704008	0.864221	-0.340797	-0.363292
2.035e-08	0.325308	0.0879107	0.0503473	0.0404845		2.035e-08	0.345188	-0.129612	-0.187287	-0.803282
2.0375e-08	0.316562	0.0881673	0.0495844	0.0383723		2.0375e-08	1.77764	-0.26665	0.0783576	0.0110413
2.04e-08	0.317408	0.0866273	0.0480587	0.0418927		2.04e-08	-1.36384	1.50832	-0.775509	-0.0107445
2.0425e-08	0.314587	0.0839322	0.0526358	0.0417166		2.0425e-08	-0.0575217	0.702604	-0.846506	1.76487
2.045e-08	0.323616	0.0886807	0.0494319	0.0403085		2.045e-08	-0.723429	-0.392924	0.710147	-1.55432
2.0475e-08	0.345058	0.0804671	0.0529409	0.0408365		2.0475e-08	-0.816872	0.956421	-0.0338839	1.78479
2.05e-08	0.314587	0.0832905	0.0460754	0.044885		2.05e-08	0.111014	-0.478409	-0.160887	0.562082
2.0525e-08	0.314869	0.0852156	0.0540089	0.0455891		2.0525e-08	1.42437	1.69192	0.725631	-0.844128
2.055e-08	0.323333	0.0841889	0.0514152	0.0373161		2.055e-08	0.24469	-1.04711	-1.48789	0.156663
2.0575e-08	0.326155	0.0867556	0.0472959	0.036436		2.0575e-08	0.535796	-0.03026	-0.488239	-1.49478
2.06e-08	0.307816	0.0845739	0.0537037	0.0433008		2.06e-08	0.635035	1.81025	0.0613819	-0.734276
2.0625e-08	0.317973	0.0836755	0.050805	0.0427728		2.0625e-08	1.89016	0.559732	1.34796	0.995273
2.065e-08	0.309226	0.087654	0.0462279	0.03626		2.065e-08	1.02678	0.565104	-0.309043	1.57856
2.0675e-08	0.315716	0.0812371	0.0524832	0.0434768		2.0675e-08	-1.83342	-1.95127	-1.4027	0.0421071
2.07e-08	0.314023	0.0844456	0.0477536	0.0429488		2.07e-08	1.09789	1.06114	-0.681526	0.989501
2.0725e-08	0.319383	0.0814938	0.0479062	0.0418927		2.0725e-08	-0.349905	1.06681	-1.09603	-0.429814
2.075e-08	0.32023	0.0848306	0.0506524	0.0387243		2.075e-08	-0.96169	-0.38815	-0.145357	0.762174
2.0775e-08	0.319383	0.0790554	0.0488216	0.0436528		2.0775e-08	0.751906	0.492594	-0.446533	0.069601
2.08e-08	0.320794	0.0786704	0.0494319	0.0369641		2.08e-08	0.657374	1.13133	0.677971	0.837946
2.0825e-08	0.328412	0.0821355	0.0433292	0.0389003		2.0825e-08	0.562516	-1.01398	-1.22286	0.814745
2.085e-08	0.288066	0.0839322	0.0431766	0.0371401		2.085e-08	2.8019	1.092	1.79052	0.485986
2.0875e-08	0.290041	0.0847022	0.0457702	0.0394284		2.0875e-08	-0.601896	-0.863165	-0.170912	1.44052
2.09e-08	0.312612	0.0763604	0.0465331	0.0383723		2.09e-08	-2.32347	0.0708286	0.7294	-0.72495
2.0925e-08	0.315998	0.0820072	0.0468382	0.0410126		2.0925e-08	1.22118	1.15447	0.369053	-0.0149142
2.095e-08	0.30443	0.0752053	0.0443971	0.0381962		2.095e-08	-0.111508	0.273541	0.524934	0.573932
2.0975e-08	0.31233	0.0813655	0.0504998	0.0387243		2.0975e-08	-0.143103	0.916755	0.911174	-0.678715
2.1e-08	0.305841	0.076617	0.0482113	0.03626		2.1e-08	-1.93737	0.624585	2.50766	1.81675
2.1025e-08	0.306687	0.0835472	0.0460754	0.0418927		2.1025e-08	1.36151	-0.0141525	0.647967	0.623968
2.105e-08	0.306123	0.0776437	0.0439394	0.0389003		2.105e-08	-0.435302	0.432758	0.804298	-0.69489
2.1075e-08	0.306969	0.077387	0.0494319	0.0410126		2.1075e-08	1.10393	-0.554745	-0.310651	-1.21473
2.11e-08	0.301044	0.0752053	0.0503473	0.0385483		2.11e-08	0.023893	0.0904833	1.00191	-0.0680933
2.1125e-08	0.308098	0.0795688	0.0433292	0.0383723		2.1125e-08	-0.205324	0.141777	-0.17353	-0.835928
2.115e-08	0.304148	0.0787988	0.0485164	0.0406605		2.115e-08	-0.369399	-0.403101	-0.423834	-0.553142
2.1175e-08	0.289194	0.0777721	0.0480587	0.0406605		2.1175e-08	2.16303	0.0454746	-0.674788	-0.0218871
2.12e-08	0.299069	0.0827772	0.0482113	0.0380202		2.12e-08	-0.303712	-0.252065	0.0036745	0.448436
2.1225e-08	0.305841	0.0786704	0.0465331	0.0399564		2.1225e-08	-0.666419	-0.0517792	-0.24756	1.41662
2.125e-08	0.307251	0.0799538	0.0453125	0.0383723		2.125e-08	-0.766054	0.748053	-0.674312	1.08099
2.1275e-08	0.295401	0.0761037	0.0471433	0.0397804		2.1275e-08	0.455294	-0.500302	-0.168905	0.370952
2.13e-08	0.297659	0.0786704	0.0454651	0.0371401		2.13e-08	1.41462	0.500787	-0.129681	0.594017
2.1325e-08	0.297659	0.0821355	0.048669	0.0380202		2.1325e-08	0.323421	-0.701335	0.494151	2.93874
2.135e-08	0.292862	0.0805955	0.0488216	0.0300993		2.135e-08	-1.43306	0.351868	0.124243	0.978827
2.1375e-08	0.311766	0.074692	0.0509575	0.0378442		2.1375e-08	1.0532	-0.552245	-1.12561	-0.610343
2.14e-08	0.312048	0.0767454	0.0468382	0.0390763		2.14e-08	0.157092	0.402951	2.60832	0.864222
2.1425e-08	0.291169	0.076617	0.0498896	0.036436		2.1425e-08	-0.00954736	-1.51116	-0.52121	-2.29544
2.145e-08	0.314305	0.0786704	0.0456177	0.0404845		2.145e-08	3.01875	1.16011	-1.71754	-1.13329
2.1475e-08	0.312048	0.0768737	0.0425663	0.0380202		2.1475e-08	-0.677347	1.56518	-0.915156	0.0313397
2.15e-08	0.297941	0.0768737	0.043024	0.0337958		2.15e-08	-0.445415	-0.709175	-1.05406	-0.247736
2.1525e-08	0.297659	0.0776437	0.0483639	0.0352039		2.1525e-08	-0.814183	-1.36919	-1.19344	-0.023995
2.155e-08	0.304148	0.0799538	0.0483639	0.0378442		2.155e-08	0.755045	0.554522	0.379803	1.83852
2.1575e-08	0.293709	0.0703285	0.0404304	0.0374922		2.1575e-08	0.185755	-0.00444442	0.655433	1.74938
2.16e-08	0.297094	0.075847	0.0405829	0.0339718		2.16e-08	0.017167	-0.00589011	-0.548601	-0.613648
2.1625e-08	0.289194	0.0722536	0.0460754	0.0399564		2.1625e-08	-0.0847816	1.01032	-0.332877	0.811518
2.165e-08	0.308662	0.0694302	0.04516	0.0343238		2.165e-08	1.69314	-0.365802	-1.65964	0.530812
2.1675e-08	0.303301	0.076617	0.0436343	0.0346759		2.1675e-08	-0.222297	-0.0108957	-0.0783992	0.502882
2.17e-08	0.292862	0.0737936	0.0447023	0.0392524		2.17e-08	0.751673	0.651285	-0.0995324	0.855423
2.1725e-08	0.311766	0.0782854	0.0447023	0.0367881		2.1725e-08	0.312977	1.16155	-0.0612741	0.954628
2.175e-08	0.299634	0.0734086	0.0495844	0.035908		2.175e-08	-0.194213	0.136626	1.9442	1.05393
2.1775e-08	0.298505	0.0731519	0.0404304	0.0396044		2.1775e-08	0.580092	0.647114	0.850621	-0.819656
2.18e-08	0.298787	0.0740503	0.0474485	0.0350279		2.18e-08	0.477358	0.0805781	-0.843094	-0.148932
2.1825e-08	0.288348	0.0768737	0.0457702	0.0352039		2.1825e-08	1.05086	0.900279	-1.10517	1.22477
2.185e-08	0.283834	0.0741786	0.0442446	0.0396044		2.185e-08	0.948212	0.486701	1.6862	1.38817
2.1875e-08	0.285527	0.0734086	0.0428715	0.0346759		2.1875e-08	-0.239543	0.484209	0.167192	-2.47535
2.19e-08	0.286091	0.0734086	0.0414983	0.0380202		2.19e-08	0.809932	-1.68533	0.745402	-0.140003
2.1925e-08	0.301044	0.0725103	0.0436343	0.0397804		2.1925e-08	0.0949893	-0.399263	-0.778271	1.36758
2.195e-08	0.288066	0.0703285	0.0427189	0.0406605		2.195e-08	0.262703	-0.454877	1.90555	0.826094
2.1975e-08	0.271137	0.0759753	0.0382944	0.0390763		2.1975e-08	1.72445	0.680345	-0.885194	-1.06497
2.2e-08	0.289194	0.0721252	0.0404304	0.0348519		2.2e-08	0.735265	0.470058	-1.02946	-0.967768
2.2025e-08	0.292862	0.06404	0.0431766	0.0420687		2.2025e-08	1.65452	-0.052467	0.817754	-0.227033
2.205e-08	0.286091	0.0707135	0.0436343	0.0355559		2.205e-08	1.00445	0.775009	-0.896405	-0.515453
2.2075e-08	0.291451	0.0690452	0.0445497	0.0346759		2.2075e-08	-2.79278	-1.15406	-0.557607	0.356126
2.21e-08	0.286091	0.0708419	0.0421086	0.0344998		2.21e-08	-0.231679	0.299095	-1.06609	0.971289
2.2125e-08	0.281294	0.0780287	0.0454651	0.0397804		2.2125e-08	0.141852	0.190498	-0.969444	0.682949
2.215e-08	0.293426	0.0695585	0.0414983	0.0369641		2.215e-08	0.653328	1.28305	-0.387025	0.264524
2.2175e-08	0.289194	0.0767454	0.0443971	0.0369641		2.2175e-08	-0.688421	0.0245307	1.29054	1.91768
2.22e-08	0.289477	0.0687885	0.0459228	0.0325636		2.22e-08	0.373141	-0.242196	-0.37442	1.88858
2.2225e-08	0.304148	0.0732803	0.0402778	0.0352039		2.2225e-08	0.12925	0.0146219	-0.337779	-0.0230132
2.225e-08	0.289759	0.0745636	0.041956	0.0337958		2.225e-08	-0.184162	-0.148099	-2.25248	0.660273
2.2275e-08	0.299069	0.0696868	0.0428715	0.0344998		2.2275e-08	-0.222477	0.109085	-0.0204708	2.12551
2.23e-08	0.28863	0.0728953	0.0413458	0.0366121		2.23e-08	-1.29663	0.577217	0.749652	-1.15998
2.2325e-08	0.281012	0.0712269	0.0407355	0.0318595		2.2325e-08	-0.921719	-0.112945	1.21546	-0.0849159
2.235e-08	0.290605	0.0639117	0.0401252	0.0373161		2.235e-08	-0.476908	-0.646676	-0.216618	-0.965459
2.2375e-08	0.279602	0.064425	0.0463805	0.0336197		2.2375e-08	-0.308271	0.772657	0.00367598	0.242645
2.24e-08	0.273112	0.0663501	0.0460754	0.0380202		2.24e-08	0.138012	0.13272	1.82052	0.995486
2.2425e-08	0.271137	0.0672484	0.0457702	0.0329157		2.2425e-08	1.34869	0.709075	0.99867	-0.410734
2.245e-08	0.279602	0.0649384	0.044092	0.0353799		2.245e-08	2.70085	0.226358	-0.563432	-0.57472
2.2475e-08	0.269445	0.0681468	0.0390573	0.0383723		2.2475e-08	0.577947	1.91882	0.889086	0.441935
2.25e-08	0.279602	0.0664784	0.0443971	0.0369641		2.25e-08	-0.783621	0.798275	-0.738539	0.672438
2.2525e-08	0.28073	0.0704569	0.0437869	0.0316835		2.2525e-08	0.0126417	0.153711	1.08717	0.311492
2.255e-08	0.281577	0.0681468	0.0408881	0.035908		2.255e-08	1.29892	0.999247	-0.853178	-0.708644
2.2575e-08	0.293709	0.0671201	0.0376842	0.0315075		2.2575e-08	-1.32385	0.0328871	-0.323095	1.56389
2.26e-08	0.281294	0.0642967	0.0410406	0.0336197		2.26e-08	-0.106369	0.239087	0.331952	0.542708
2.2625e-08	0.282141	0.0678901	0.0411932	0.0383723		2.2625e-08	1.46361	0.445682	-0.189814	0.972165
2.265e-08	0.287784	0.0667351	0.041956	0.0322116		2.265e-08	2.05582	0.492065	-0.650733	-0.845345
2.2675e-08	0.273677	0.0680185	0.0405829	0.03626		2.2675e-08	0.334416	0.377654	-0.180515	-1.07841
2.27e-08	0.281577	0.0662218	0.0407355	0.0330917		2.27e-08	-0.0565021	0.0481686	2.095	-1.77584
2.2725e-08	0.299069	0.0641684	0.0421086	0.0367881		2.2725e-08	-0.0265588	0.738817	1.51028	1.70373
2.275e-08	0.284962	0.064425	0.0437869	0.036084		2.275e-08	0.214453	-1.90502	0.11349	-1.11713
2.2775e-08	0.290323	0.0713552	0.0405829	0.0290432		2.2775e-08	-0.530327	-1.75417	-0.724714	0.575738
2.28e-08	0.277909	0.0671201	0.0424137	0.0281631		2.28e-08	0.909217	0.500458	0.122448	0.741684
2.2825e-08	0.28073	0.0645534	0.0414983	0.0313315		2.2825e-08	0.445758	0.60026	0.032905	-0.557582
2.285e-08	0.282141	0.0626283	0.037379	0.0367881		2.285e-08	1.0412	-0.813787	0.819935	1.54112
2.2875e-08	0.259287	0.063655	0.0418035	0.0366121		2.2875e-08	2.34521	-2.3938	0.668084	-1.29558
2.29e-08	0.296248	0.0695585	0.0421086	0.0343238		2.29e-08	0.961043	0.358391	-1.74398	-0.0620385
2.2925e-08	0.26888	0.0689168	0.0396675	0.0366121		2.2925e-08	1.48785	2.52027	0.865913	-0.431446
2.295e-08	0.282423	0.0673768	0.0399727	0.0348519		2.295e-08	0.525527	-0.202728	0.335938	-0.132017
2.2975e-08	0.262391	0.0633983	0.0393624	0.0309794		2.2975e-08	0.484564	1.74593	0.245562	-0.301317
2.3e-08	0.283552	0.0641684	0.0393624	0.03626		2.3e-08	1.29673	-0.603704	0.785375	0.602716
2.3025e-08	0.272548	0.0654517	0.0401252	0.0369641		2.3025e-08	1.46983	0.967119	-0.314899	0.0976903
2.305e-08	0.26747	0.064425	0.0381419	0.0344998		2.305e-08	1.14438	-0.78898	0.0988329	0.39854
2.3075e-08	0.268598	0.0627567	0.0407355	0.0350279		2.3075e-08	0.675488	1.2224	-1.38444	-0.108004
2.31e-08	0.261545	0.0672484	0.0379893	0.0297473		2.31e-08	0.276947	0.337756	0.612053	-1.2897
2.3125e-08	0.272548	0.06173	0.0376842	0.0320356		2.3125e-08	0.306398	0.601613	0.710887	2.38392
2.315e-08	0.276498	0.0626283	0.0422612	0.0300993		2.315e-08	1.5523	1.90845	-0.332576	1.33732
2.3175e-08	0.26493	0.0609599	0.0396675	0.027459		2.3175e-08	0.50859	0.691555	0.083005	-0.793408
2.32e-08	0.268598	0.0618583	0.0389047	0.0341478		2.32e-08	1.04015	0.846556	-0.0730499	-0.627385
2.3225e-08	0.275087	0.062885	0.0396675	0.0313315		2.3225e-08	-0.00640826	-0.650122	0.0251766	0.216498
2.325e-08	0.279319	0.0604466	0.0372265	0.035908		2.325e-08	-0.121137	-0.496664	0.251	-0.701531
2.3275e-08	0.270009	0.0680185	0.0360059	0.0329157		2.3275e-08	1.34622	-1.17099	-1.4374	-2.70808
2.33e-08	0.27283	0.0651951	0.0379893	0.0350279		2.33e-08	-0.423624	-1.73659	-0.637949	-0.64049
2.3325e-08	0.260416	0.0618583	0.0379893	0.0381962		2.3325e-08	0.757962	0.296833	0.355024	1.29529
2.335e-08	0.261827	0.0631417	0.0372265	0.0308034		2.335e-08	-0.222658	0.00833269	1.35008	0.51032
2.3375e-08	0.281577	0.061345	0.0357008	0.0332677		2.3375e-08	-0.41087	-0.724682	-0.98595	1.15564
2.34e-08	0.269162	0.0626283	0.0411932	0.0336197		2.34e-08	-0.021106	1.15042	0.458866	0.0274171
2.3425e-08	0.277062	0.0609599	0.0355482	0.0367881		2.3425e-08	-0.716239	1.75122	-1.17674	0.741815
2.345e-08	0.255337	0.0580082	0.0405829	0.0320356		2.345e-08	1.12296	-0.429892	1.68575	0.294732
2.3475e-08	0.261262	0.0601899	0.0405829	0.0306274		2.3475e-08	1.73293	2.17661	-0.0810253	0.805344
2.35e-08	0.274241	0.0639117	0.038447	0.0302754		2.35e-08	2.70708	0.43685	0.532925	-1.63084
2.3525e-08	0.271137	0.0668634	0.0416509	0.0332677		2.3525e-08	2.44763	2.21232	0.244778	0.388358
2.355e-08	0.260134	0.0582649	0.0389047	0.0308034		2.355e-08	-0.431557	0.188374	-1.01301	-1.36666
2.3575e-08	0.256184	0.0603183	0.0381419	0.0318595		2.3575e-08	0.25177	-0.720574	-0.592428	0.0379366
2.36e-08	0.264366	0.063655	0.0396675	0.0344998		2.36e-08	-0.230008	1.90046	0.346849	-0.137958
2.3625e-08	0.255902	0.0583932	0.0378367	0.0295713		2.3625e-08	-0.347951	-1.02972	1.80653	0.0991982
2.365e-08	0.256466	0.0580082	0.0346328	0.0325636		2.365e-08	0.191288	-1.26928	-0.428509	-0.14611
2.3675e-08	0.258723	0.0540298	0.0366162	0.0295713		2.3675e-08	-0.219072	1.30401	-0.720125	0.92015
2.37e-08	0.262109	0.062115	0.03387	0.0308034		2.37e-08	0.980143	1.40454	-1.92266	0.329416
2.3725e-08	0.253645	0.0622433	0.038447	0.0343238		2.3725e-08	0.569622	1.27958	0.386765	0.152589
2.375e-08	0.26098	0.0572382	0.0343277	0.0322116		2.375e-08	-1.01551	-1.61301	1.39796	-0.856048
2.3775e-08	0.248848	0.0565965	0.0439394	0.0329157		2.3775e-08	-0.327672	0.915153	-0.328353	0.14426
2.38e-08	0.261827	0.0574949	0.0393624	0.0276351		2.38e-08	-1.03512	-0.117101	-0.817865	0.59117
2.3825e-08	0.266341	0.0554415	0.0321917	0.0313315		2.3825e-08	0.831215	-1.71872	1.24087	0.969422
2.385e-08	0.274241	0.0569815	0.0349379	0.035732		2.385e-08	0.638938	0.590953	-0.622454	-1.50394
2.3875e-08	0.246309	0.0580082	0.0390573	0.0337958		2.3875e-08	-0.217375	0.00871559	0.589144	-1.33616
2.39e-08	0.265777	0.0523614	0.0347854	0.0355559		2.39e-08	-0.558844	-0.802501	-0.360905	0.644501
2.3925e-08	0.264648	0.0599333	0.0332597	0.0380202		2.3925e-08	0.0594151	1.57324	0.459569	0.396057
2.395e-08	0.253362	0.06404	0.0382944	0.0350279		2.395e-08	0.678889	0.704787	-0.164179	-0.0625496
2.3975e-08	0.270855	0.0544148	0.0331071	0.0322116		2.3975e-08	1.29956	-1.42166	1.1845	1.36602
2.4e-08	0.243205	0.0565965	0.0343277	0.0308034		2.4e-08	-0.375991	0.504308	0.757587	-0.352834
2.4025e-08	0.249695	0.0581365	0.0326494	0.0281631		2.4025e-08	-0.942286	-1.79943	-1.58258	1.4987
2.405e-08	0.249695	0.0609599	0.0346328	0.0279871		2.405e-08	0.272444	-1.12996	-0.0993921	0.26724
2.4075e-08	0.263237	0.0567248	0.0402778	0.0293953		2.4075e-08	0.0771607	0.458613	-0.859839	-1.10733
2.41e-08	0.256184	0.0545431	0.0323443	0.0255228		2.41e-08	0.848777	0.844977	1.68555	0.538029
2.4125e-08	0.268598	0.0550565	0.0364636	0.0306274		2.4125e-08	1.99435	2.0945	-0.200554	-1.75411
2.415e-08	0.262109	0.0599333	0.0376842	0.0329157		2.415e-08	0.830709	-0.509453	-0.300848	-1.79681
2.4175e-08	0.265495	0.0549281	0.0360059	0.0288672		2.4175e-08	1.60531	0.626032	-0.135953	0.416975
2.42e-08	0.246591	0.0580082	0.0389047	0.0311555		2.42e-08	0.737657	0.667936	0.959351	-0.258987
2.4225e-08	0.257312	0.0576232	0.0353956	0.0281631		2.4225e-08	2.18676	0.189961	-1.13547	0.0528951
2.425e-08	0.267187	0.0537731	0.0364636	0.0378442		2.425e-08	0.868554	0.17335	-0.571713	-0.129848
2.4275e-08	0.266623	0.0574949	0.0407355	0.0313315		2.4275e-08	-1.65156	-0.0171731	-1.00664	-0.667143
2.43e-08	0.236716	0.0572382	0.0353956	0.0332677		2.43e-08	-0.875934	1.00901	0.492353	0.637395
2.4325e-08	0.255337	0.0563398	0.0349379	0.0334437		2.4325e-08	0.802354	-0.574166	0.191003	-0.964817
2.435e-08	0.248566	0.0560832	0.03387	0.0311555		2.435e-08	-0.898842	0.337307	-0.244812	0.839186
2.4375e-08	0.249413	0.0586499	0.038447	0.0288672		2.4375e-08	-1.92629	1.30901	-0.0791913	0.869187
2.44e-08	0.253927	0.0535164	0.0341751	0.0350279		2.44e-08	-0.47011	-0.221471	1.89597	-0.310874
2.4425e-08	0.245463	0.0524897	0.0353956	0.0343238		2.4425e-08	0.838181	0.285236	-0.619106	0.216679
2.445e-08	0.228816	0.0568532	0.0355482	0.0339718		2.445e-08	-0.03982	1.72713	-0.453525	1.67254
2.4475e-08	0.245463	0.0549281	0.0324969	0.0278111		2.4475e-08	0.440333	0.95128	0.519027	-0.295965
2.45e-08	0.26747	0.0555698	0.0332597	0.0262269		2.45e-08	-2.40645	1.16824	-0.592644	-0.553214
2.4525e-08	0.266059	0.0573665	0.0337174	0.0323876		2.4525e-08	2.84176	0.330996	-0.29207	0.405249
2.455e-08	0.251105	0.0526181	0.0411932	0.0299233		2.455e-08	0.825102	-0.156458	1.76248	2.22507
2.4575e-08	0.250823	0.0550565	0.0343277	0.0288672		2.4575e-08	0.245657	-0.586476	-1.24212	1.32405
2.46e-08	0.250823	0.0596766	0.0324969	0.026755		2.46e-08	0.196541	-0.135736	0.139774	1.28235
2.4625e-08	0.275087	0.0604466	0.032802	0.0308034		2.4625e-08	-0.156787	2.02294	-0.437489	0.0909837
2.465e-08	0.247155	0.0519764	0.0332597	0.0300993		2.465e-08	0.630499	-0.11529	-0.474211	2.13347
2.4675e-08	0.250823	0.051463	0.0305135	0.0299233		2.4675e-08	-1.3989	-1.13762	0.844946	0.36448
2.47e-08	0.259852	0.0526181	0.0369213	0.0292192		2.47e-08	1.37101	-0.508512	0.470037	-0.327202
2.4725e-08	0.250259	0.0540298	0.0324969	0.0283391		2.4725e-08	1.01723	0.181102	-0.177532	-1.23681
2.475e-08	0.254491	0.0555698	0.0344802	0.0290432		2.475e-08	1.88504	-0.134328	1.55402	0.59583
2.4775e-08	0.271702	0.0565965	0.0335648	0.0323876		2.4775e-08	1.45441	0.319929	-0.864328	1.27549
2.48e-08	0.250541	0.0582649	0.0347854	0.0264029		2.48e-08	0.0276381	-0.174442	0.392813	0.00261046
2.4825e-08	0.233048	0.051463	0.0337174	0.0322116		2.4825e-08	1.27995	0.518184	0.765475	0.682868
2.485e-08	0.239538	0.0501797	0.0341751	0.0286912		2.485e-08	-0.380132	1.15283	0.933925	-0.665908
2.4875e-08	0.236716	0.0527464	0.0294455	0.0290432		2.4875e-08	-2.42752	-2.26076	-0.128152	-3.32407
2.49e-08	0.265495	0.0541581	0.0344802	0.0286912		2.49e-08	-1.78895	-0.733696	0.518744	-0.683455
2.4925e-08	0.257877	0.0526181	0.0309712	0.0300993		2.4925e-08	0.697377	1.03563	-0.0664668	0.507816
2.495e-08	0.229945	0.0519764	0.0353956	0.0283391		2.495e-08	0.493122	0.538064	0.238776	0.463701
2.4975e-08	0.240948	0.0545431	0.0341751	0.0300993		2.4975e-08	0.2113	-0.140266	-1.9275	0.856734
2.5e-08	0.239538	0.0562115	0.032802	0.0293953		2.5e-08	1.31788	0.976717	0.301008	0.374966
2.5025e-08	0.255337	0.0530031	0.0364636	0.0249948		2.5025e-08	-0.972268	0.656835	0.332057	-1.2034
2.505e-08	0.246873	0.0524897	0.0303609	0.0281631		2.505e-08	-0.638072	-1.88545	-1.77244	-0.811154
2.5075e-08	0.246873	0.049153	0.0344802	0.0262269		2.5075e-08	0.548129	-0.646832	-0.916208	-1.36957
2.51e-08	0.243205	0.0508213	0.0334123	0.0278111		2.51e-08	-1.28503	-1.0303	1.18433	1.29414
2.5125e-08	0.240666	0.0464579	0.0329546	0.0255228		2.5125e-08	0.368116	0.151734	-0.0278095	-1.68337
2.515e-08	0.240102	0.0476129	0.0318866	0.0295713		2.515e-08	-0.537379	-0.111221	-0.965846	-2.02433
2.5175e-08	0.25308	0.0556981	0.0321917	0.0244667		2.5175e-08	0.0317802	-0.0125129	1.00262	-0.675957
2.52e-08	0.237563	0.0458162	0.0305135	0.0336197		2.52e-08	0.757607	-0.639165	0.202231	1.11646
2.5225e-08	0.236998	0.0542864	0.0305135	0.0283391		2.5225e-08	2.10775	-1.20684	1.27379	1.3662
2.525e-08	0.24772	0.0524897	0.0292929	0.0290432		2.525e-08	1.74574	0.466214	0.958108	-0.226319
2.5275e-08	0.246027	0.0477413	0.031734	0.0258749		2.5275e-08	0.914791	-1.25452	-0.0537818	-0.567885
2.53e-08	0.237845	0.0486396	0.0350905	0.0297473		2.53e-08	1.40978	-0.00313193	0.742104	-0.0978171
2.5325e-08	0.246309	0.0450462	0.0331071	0.0264029		2.5325e-08	-0.908684	0.156433	0.49423	-0.883716
2.535e-08	0.251387	0.0508213	0.0324969	0.026579		2.535e-08	0.837406	0.255377	-0.242577	-0.635185
2.5375e-08	0.228252	0.0472279	0.0357008	0.0248188		2.5375e-08	1.17694	-1.10834	0.904552	0.502773
2.54e-08	0.250259	0.0517197	0.0332597	0.0283391		2.54e-08	2.14438	-0.278537	-0.183028	-2.139
2.5425e-08	0.23982	0.0467146	0.0335648	0.0279871		2.5425e-08	1.30848	0.49203	0.616563	-1.89113
2.545e-08	0.240384	0.051848	0.0347854	0.0255228		2.545e-08	2.59215	-0.264732	0.0867316	1.99825
2.5475e-08	0.233613	0.0481263	0.0283775	0.0253468		2.5475e-08	-0.289816	0.446224	-1.07544	0.614287
2.55e-08	0.240102	0.0451745	0.028225	0.0309794		2.55e-08	1.30956	2.01692	-0.485102	1.90792
2.5525e-08	0.246027	0.050693	0.0367688	0.0285152		2.5525e-08	0.469229	-1.07328	-0.455837	2.08607
2.555e-08	0.236152	0.0450462	0.0309712	0.0283391		2.555e-08	0.337046	0.437534	-0.426617	-1.46595
2.5575e-08	0.231073	0.0463296	0.0309712	0.0237626		2.5575e-08	0.204526	-0.754934	1.08143	2.14443
2.56e-08	0.23333	0.0442762	0.031734	0.0228825		2.56e-08	0.229749	-0.349045	0.195706	0.0803279
2.5625e-08	0.232766	0.0467146	0.0340225	0.0211223		2.5625e-08	0.0967478	2.40058	-1.46819	-0.191965
2.565e-08	0.236998	0.0497947	0.0308186	0.0278111		2.565e-08	1.70563	0.341841	-0.733757	-0.315032
2.5675e-08	0.237563	0.0460729	0.0358533	0.0260509		2.5675e-08	1.1774	3.03665	-0.77572	0.236479
2.57e-08	0.237845	0.0463296	0.0306661	0.0230586		2.57e-08	0.727424	0.478832	0.173233	0.188564
2.5725e-08	0.231073	0.0490246	0.0308186	0.027107		2.5725e-08	1.15018	-1.03201	0.557184	2.31946
2.575e-08	0.227123	0.049923	0.031734	0.0253468		2.575e-08	0.858156	0.554038	0.445276	0.317865
2.5775e-08	0.230227	0.0468429	0.0276147	0.0329157		2.5775e-08	-0.4691	1.21236	-0.874165	-0.483242
2.58e-08	0.23192	0.049538	0.0315815	0.0322116		2.58e-08	0.98907	0.131788	-1.41452	-0.758503
2.5825e-08	0.22402	0.0447895	0.0329546	0.0302754		2.5825e-08	-0.739526	1.16418	-1.67145	-1.0344
2.585e-08	0.216684	0.0528747	0.0305135	0.0288672		2.585e-08	1.1202	2.07424	0.777854	0.274912
2.5875e-08	0.240948	0.0479979	0.0331071	0.0264029		2.5875e-08	-1.49063	1.11536	0.37992	-1.66362
2.59e-08	0.237845	0.0450462	0.0312763	0.0230586		2.59e-08	1.01172	-0.157955	1.19458	-0.276745
2.5925e-08	0.239255	0.049153	0.0288352	0.0306274		2.5925e-08	-0.40364	0.128433	-1.06167	-0.326239
2.595e-08	0.24123	0.050308	0.0315815	0.0234106		2.595e-08	0.0212006	0.415404	0.468371	0.609766
2.5975e-08	0.237563	0.0467146	0.0302084	0.0232346		2.5975e-08	-0.0344459	0.0764392	1.7151	-0.349793
2.6e-08	0.23192	0.050308	0.0294455	0.0253468		2.6e-08	0.150593	-0.702475	-1.26462	0.132094
2.6025e-08	0.23333	0.048768	0.0254788	0.0223545		2.6025e-08	1.62181	-0.729803	1.13072	0.538808
2.605e-08	0.230509	0.0432495	0.0311238	0.0246427		2.605e-08	1.80867	-0.254427	0.873366	3.53444
2.6075e-08	0.228816	0.0424795	0.0318866	0.026931		2.6075e-08	0.224252	0.0960343	-0.966396	-0.626769
2.61e-08	0.248566	0.050693	0.0277673	0.0262269		2.61e-08	-0.154258	0.76222	-1.37056	-1.51651
2.6125e-08	0.226277	0.0479979	0.0308186	0.0248188		2.6125e-08	-0.130138	0.231359	-1.19922	0.493281
2.615e-08	0.22007	0.0456879	0.0276147	0.0255228		2.615e-08	-0.994401	-2.3847	-0.378486	1.89562
2.6175e-08	0.222609	0.0467146	0.0305135	0.0221785		2.6175e-08	-0.243558	0.619915	-3.31033	0.546569
2.62e-08	0.226559	0.0470996	0.0305135	0.0295713		2.62e-08	0.104109	0.656525	-0.322033	-0.958388
2.6225e-08	0.222891	0.0521047	0.0334123	0.0306274		2.6225e-08	-0.114603	0.693122	-0.293815	0.139927
2.625e-08	0.222891	0.0467146	0.0332597	0.0256989		2.625e-08	0.963456	0.0953092	2.34151	-0.0641167
2.6275e-08	0.22402	0.0436345	0.0311238	0.0193622		2.6275e-08	-0.228902	-0.567511	1.4299	0.499444
2.63e-08	0.226841	0.0458162	0.0288352	0.0251708		2.63e-08	-0.2051	-1.04123	1.09686	-0.550579
2.6325e-08	0.236152	0.0438912	0.0303609	0.026931		2.6325e-08	-0.506589	0.0751502	-0.326607	-0.294398
2.635e-08	0.219223	0.0456879	0.0341751	0.0295713		2.635e-08	-2.19246	0.811612	-0.444139	1.88821
2.6375e-08	0.214427	0.0419661	0.0276147	0.0249948		2.6375e-08	-1.03002	0.528929	-0.707556	-0.860307
2.64e-08	0.229945	0.0450462	0.0285301	0.0244667		2.64e-08	-0.680897	-1.28727	-1.26303	-0.140671
2.6425e-08	0.235588	0.0464579	0.0306661	0.0246427		2.6425e-08	0.566845	0.856617	-1.38204	1.19851
2.645e-08	0.224302	0.0492813	0.026089	0.0293953		2.645e-08	0.264413	0.828885	0.762211	0.142581
2.6475e-08	0.23192	0.0458162	0.0299032	0.0283391		2.6475e-08	0.452097	-0.929273	-0.159097	-0.450974
2.65e-08	0.217531	0.0445328	0.0292929	0.0249948		2.65e-08	-0.751771	-1.02346	-0.497045	0.27171
2.6525e-08	0.218941	0.0423511	0.0292929	0.0256989		2.6525e-08	2.38544	-0.218794	-0.6893	0.76301
2.655e-08	0.217813	0.0488963	0.0344802	0.0242907		2.655e-08	0.278594	-0.376968	-0.368823	0.711622
2.6575e-08	0.229663	0.0481263	0.0288352	0.0262269		2.6575e-08	0.548834	1.13808	0.759541	0.504594
2.66e-08	0.22797	0.0444045	0.0299032	0.0235866		2.66e-08	-2.38593	0.787518	-1.04856	1.07516
2.6625e-08	0.227406	0.0422228	0.0300558	0.0205943		2.6625e-08	1.09073	-0.596184	-1.61018	-0.222403
2.665e-08	0.213298	0.0449179	0.0303609	0.027283		2.665e-08	1.60945	-1.01421	-0.995123	0.894211
2.6675e-08	0.198345	0.0427361	0.0276147	0.027459		2.6675e-08	-0.42621	1.99388	1.02131	-1.18657
2.67e-08	0.227688	0.0463296	0.0259365	0.0241147		2.67e-08	0.917079	0.99509	-1.01542	0.868603
2.6725e-08	0.215838	0.0463296	0.0254788	0.0190101		2.6725e-08	0.280739	0.512425	1.005	0.191039
2.675e-08	0.21217	0.0449179	0.0295981	0.0256989		2.675e-08	-1.59697	-0.360728	-0.149042	-1.50545
2.6775e-08	0.213298	0.0424795	0.027157	0.026931		2.6775e-08	0.990158	-0.391587	0.988277	1.4171
2.68e-08	0.212734	0.0417094	0.0299032	0.0246427		2.68e-08	-0.559328	0.0325293	-1.64973	-0.124851
2.6825e-08	0.214991	0.0433778	0.0253262	0.0218264		2.6825e-08	1.12164	0.0668865	-1.47568	-0.8064
2.685e-08	0.219223	0.0411961	0.0292929	0.0279871		2.685e-08	-1.01177	-0.680826	1.29635	-1.17504
2.6875e-08	0.209631	0.0442762	0.0309712	0.0248188		2.6875e-08	1.91798	0.722757	0.656376	-1.07251
2.69e-08	0.226277	0.0442762	0.0331071	0.0241147		2.69e-08	-1.05038	-0.417927	-0.579918	0.211179
2.6925e-08	0.21217	0.0374743	0.0312763	0.0237626		2.6925e-08	0.636443	-0.253427	-1.14875	1.65498
2.695e-08	0.214145	0.0449179	0.0273096	0.0242907		2.695e-08	-0.256176	0.958778	-0.377384	0.103815
2.6975e-08	0.231073	0.0431211	0.0251736	0.0235866		2.6975e-08	-0.316652	-1.23425	0.0970919	0.444723
2.7e-08	0.223173	0.0426078	0.027157	0.0235866		2.7e-08	0.206995	-1.72647	-1.14505	-0.636563
2.7025e-08	0.222609	0.0418378	0.0305135	0.0279871		2.7025e-08	-0.187506	-0.183773	-2.01606	0.732706
2.705e-08	0.220634	0.0478696	0.0312763	0.0248188		2.705e-08	2.09342	0.63892	-0.270046	1.86698
2.7075e-08	0.221198	0.0450462	0.0292929	0.0264029		2.7075e-08	-1.39757	-2.42052	-0.393099	-0.881146
2.71e-08	0.208502	0.0429928	0.0315815	0.0258749		2.71e-08	-0.705624	0.44424	-0.366515	-0.777967
2.7125e-08	0.204834	0.0424795	0.0303609	0.0230586		2.7125e-08	1.58122	-0.313287	-1.84098	0.0402533
2.715e-08	0.216684	0.0368326	0.0262416	0.0283391		2.715e-08	0.59818	0.446534	-0.238211	2.60925
2.7175e-08	0.225148	0.0414528	0.0283775	0.0248188		2.7175e-08	-1.14311	-0.378908	0.239697	-0.547062
2.72e-08	0.23587	0.0390144	0.0279198	0.0212984		2.72e-08	-1.28958	1.24294	-2.21742	0.273672
2.7225e-08	0.213298	0.0411961	0.026089	0.0211223		2.7225e-08	2.6051	-0.113747	-0.00745288	0.936468
2.725e-08	0.214427	0.0424795	0.0303609	0.0249948		2.725e-08	2.209	-2.26966	1.07541	0.642629
2.7275e-08	0.224302	0.0422228	0.0257839	0.0220024		2.7275e-08	-0.381269	0.550634	1.55628	-0.530766
2.73e-08	0.219788	0.0409394	0.0286827	0.0235866		2.73e-08	-0.950024	-0.545769	-0.90978	0.292906
2.7325e-08	0.197216	0.0390144	0.0273096	0.0255228		2.7325e-08	0.0859597	-0.845968	-0.505771	2.399
2.735e-08	0.211323	0.037346	0.0295981	0.0248188		2.735e-08	0.954669	1.7184	-1.23707	1.14354
2.7375e-08	0.22402	0.038116	0.0268519	0.0212984		2.7375e-08	1.74031	1.21975	-1.28758	-1.39781
2.74e-08	0.199191	0.037731	0.0303609	0.0230586		2.74e-08	0.408344	-1.01641	-0.0481025	0.873231
2.7425e-08	0.201731	0.0374743	0.0294455	0.026931		2.7425e-08	0.4313	0.285827	-1.38902	-1.11084
2.745e-08	0.202577	0.0420944	0.0279198	0.0249948		2.745e-08	-1.49903	-1.08633	-0.0711927	-0.363645
2.7475e-08	0.217248	0.0444045	0.0276147	0.0204183		2.7475e-08	1.75231	0.218562	1.17311	-0.822922
2.75e-08	0.200602	0.0435062	0.0263942	0.0248188		2.75e-08	-0.180564	-0.351964	-0.704198	-0.154718
2.7525e-08	0.210477	0.0391427	0.0292929	0.0253468		2.7525e-08	0.0120241	0.0162528	0.312977	-0.0500665
2.755e-08	0.214709	0.0419661	0.0245634	0.0256989		2.755e-08	0.460659	0.721284	0.644964	1.50839
2.7575e-08	0.218095	0.0386294	0.0259365	0.0211223		2.7575e-08	2.19006	-0.456645	-0.398118	0.563812
2.76e-08	0.201449	0.0410678	0.0289878	0.0220024		2.76e-08	-1.28748	-0.828766	0.928199	0.750176
2.7625e-08	0.209066	0.0415811	0.0259365	0.0221785		2.7625e-08	-1.00995	-0.257503	0.87871	2.15179
2.765e-08	0.205963	0.037346	0.0268519	0.0262269		2.765e-08	-0.132892	-0.630349	-1.01064	1.77245
2.7675e-08	0.201166	0.0438912	0.0265467	0.0225305		2.7675e-08	-0.110768	0.280264	-0.294938	-0.230713
2.77e-08	0.211606	0.0442762	0.0263942	0.0228825		2.77e-08	0.340054	2.00487	0.191728	1.01145
2.7725e-08	0.211323	0.0408111	0.0254788	0.0220024		2.7725e-08	0.534223	-0.331523	-1.3966	0.54845
2.775e-08	0.206245	0.0370893	0.0253262	0.0220024		2.775e-08	-0.903441	-0.0282021	1.24474	-1.13636
2.7775e-08	0.208502	0.0364476	0.0262416	0.0202422		2.7775e-08	-0.796205	0.207764	1.1949	0.597147
2.78e-08	0.209066	0.0436345	0.0288352	0.0227065		2.78e-08	0.602143	-0.507431	-0.397456	-0.357113
2.7825e-08	0.202295	0.0406827	0.0247159	0.0214744		2.7825e-08	1.14161	-0.40779	0.0911469	-0.0072796
2.785e-08	0.206527	0.0363193	0.0280724	0.0195382		2.785e-08	0.647316	-1.67035	1.81698	0.424878
2.7875e-08	0.203141	0.0386294	0.026089	0.0228825		2.7875e-08	0.324659	-0.480861	-0.321151	0.121777
2.79e-08	0.209913	0.0399127	0.0292929	0.0225305		2.79e-08	-0.948956	-1.81466	0.0139856	0.227362
2.7925e-08	0.203141	0.0405544	0.0257839	0.0230586		2.7925e-08	-0.40907	0.88067	-0.580266	-0.15853
2.795e-08	0.207374	0.0411961	0.0285301	0.0223545		2.795e-08	1.25703	-1.0704	2.78077	0.110953
2.7975e-08	0.204834	0.0367043	0.0280724	0.0255228		2.7975e-08	-2.8785	-1.17659	0.712517	-0.932691
2.8e-08	0.203141	0.0419661	0.0257839	0.0204183		2.8e-08	0.956308	-0.666032	0.505664	0.322587
2.8025e-08	0.204834	0.0400411	0.0280724	0.0241147		2.8025e-08	1.67344	0.257357	-1.80258	2.07376
2.805e-08	0.228534	0.0374743	0.0262416	0.0244667		2.805e-08	-0.12779	-0.603939	1.80399	-0.700324
2.8075e-08	0.218941	0.038501	0.0242582	0.026755		2.8075e-08	0.415603	-1.19206	-1.2094	1.95967
2.81e-08	0.185084	0.0374743	0.0279198	0.0209463		2.81e-08	1.9175	0.697562	-1.34126	0.747428
2.8125e-08	0.210477	0.0383727	0.0270044	0.0209463		2.8125e-08	2.11524	-0.786778	1.18265	-0.549763
2.815e-08	0.204552	0.038886	0.0253262	0.0237626		2.815e-08	1.17955	0.00305436	0.818216	-0.527018
2.8175e-08	0.206809	0.0352926	0.0288352	0.026579		2.8175e-08	0.242066	-0.310865	-0.642827	-0.752465
2.82e-08	0.202013	0.0436345	0.0251736	0.0220024		2.82e-08	0.526052	0.411936	0.63553	1.17476
2.8225e-08	0.200602	0.0399127	0.0265467	0.0242907		2.8225e-08	0.548147	0.513076	-1.53458	-0.375864
2.825e-08	0.21217	0.0376027	0.0262416	0.0248188		2.825e-08	1.3581	1.16885	-0.568733	0.559639
2.8275e-08	0.21217	0.037346	0.0265467	0.0251708		2.8275e-08	0.855139	1.75653	1.57773	1.91212
2.83e-08	0.205399	0.0355493	0.0212069	0.0248188		2.83e-08	0.965112	0.400337	0.424475	-0.473807
2.8325e-08	0.192138	0.0350359	0.027157	0.0193622		2.8325e-08	-0.504981	0.0842072	0.528728	1.3794
2.835e-08	0.189317	0.0350359	0.0265467	0.0216504		2.835e-08	-0.835552	0.950772	1.42131	0.987252
2.8375e-08	0.208784	0.0395277	0.0266993	0.0197142		2.8375e-08	1.12004	0.216257	1.44775	1.09453
2.84e-08	0.196934	0.0345226	0.0273096	0.0241147		2.84e-08	0.614224	-0.5199	0.2106	-0.133231
2.8425e-08	0.197216	0.0340092	0.0228851	0.0232346		2.8425e-08	0.28367	-0.140233	-1.34524	-0.945725
2.845e-08	0.202859	0.0390144	0.0238005	0.0225305		2.845e-08	-0.312151	0.240201	-0.688542	2.33709
2.8475e-08	0.221198	0.0419661	0.0262416	0.0218264		2.8475e-08	1.38629	-1.68839	-0.822689	-0.483258
2.85e-08	0.203706	0.039656	0.0233428	0.0230586		2.85e-08	0.436799	-1.51919	-0.798601	1.13076
2.8525e-08	0.183109	0.0399127	0.0270044	0.0223545		2.8525e-08	-1.48751	0.123284	0.892121	0.316124
2.855e-08	0.211606	0.037731	0.0245634	0.0204183		2.855e-08	1.80804	-2.23335	0.758892	0.0873728
2.8575e-08	0.191009	0.0382443	0.026089	0.0237626		2.8575e-08	-0.739037	0.114649	-0.80606	-0.813961
2.86e-08	0.197781	0.038886	0.0266993	0.0198902		2.86e-08	-1.33953	-1.4028	-1.73735	-0.623892
2.8625e-08	0.197216	0.038116	0.0268519	0.0216504		2.8625e-08	-0.0767328	1.0919	2.42886	-0.938525
2.865e-08	0.189881	0.0378593	0.0251736	0.0200662		2.865e-08	-0.500065	-1.06258	0.382241	0.346967
2.8675e-08	0.197216	0.0349076	0.026089	0.0218264		2.8675e-08	1.29951	0.661175	-0.0717462	-0.389062
2.87e-08	0.189034	0.0347793	0.0238005	0.0232346		2.87e-08	-1.26017	-0.933123	0.0327213	-0.620067
2.8725e-08	0.188188	0.0337526	0.0256313	0.0204183		2.8725e-08	0.274636	2.56313	0.0573454	2.27463
2.875e-08	0.199474	0.0359343	0.0219697	0.0221785		2.875e-08	-2.02331	0.258997	-1.19918	0.946167
2.8775e-08	0.190445	0.0378593	0.0245634	0.0207703		2.8775e-08	2.45986	2.62939	0.0263579	1.13885
2.88e-08	0.20032	0.0331109	0.0222748	0.0228825		2.88e-08	1.50001	-0.318681	0.692625	0.738685
2.8825e-08	0.182827	0.0324692	0.0274621	0.0253468		2.8825e-08	0.0910706	0.705915	-1.28996	-1.52819
2.885e-08	0.190445	0.0367043	0.0230377	0.0204183		2.885e-08	-0.604286	1.23471	-1.34726	0.869734
2.8875e-08	0.184802	0.0349076	0.0273096	0.0188341		2.8875e-08	0.31211	-0.656486	0.526379	0.892889
2.89e-08	0.197216	0.0372177	0.0201389	0.0216504		2.89e-08	0.691986	-0.128135	1.19553	0.235613
2.8925e-08	0.189317	0.0350359	0.0228851	0.0193622		2.8925e-08	1.52146	0.758102	-1.84258	0.513549
2.895e-08	0.195241	0.0358059	0.0231903	0.0223545		2.895e-08	0.465234	-1.21128	1.40786	-0.145406
2.8975e-08	0.194677	0.0379877	0.0219697	0.0221785		2.8975e-08	0.666303	-0.10989	0.141024	-0.464475
2.9e-08	0.195524	0.0401694	0.0251736	0.01813		2.9e-08	0.777654	-0.581214	-0.481503	0.49646
2.9025e-08	0.187342	0.0334959	0.023648	0.0218264		2.9025e-08	-1.63416	0.379665	1.88931	0.348176
2.905e-08	0.193549	0.0356776	0.0244108	0.0202422		2.905e-08	0.369366	-0.809796	0.943045	0.883859
2.9075e-08	0.178877	0.0288758	0.026089	0.0211223		2.9075e-08	-0.602863	0.583598	0.562524	0.564286
2.91e-08	0.192138	0.0352926	0.0244108	0.0165458		2.91e-08	-0.76362	1.7642	-2.25398	1.01537
2.9125e-08	0.184238	0.0338809	0.0241057	0.0186581		2.9125e-08	-0.381994	1.14794	-0.932173	-0.505729
2.915e-08	0.178877	0.0387577	0.0248685	0.0204183		2.915e-08	0.634069	1.46696	-0.0144825	-1.42869
2.9175e-08	0.196934	0.0333675	0.0239531	0.0204183		2.9175e-08	-0.976022	-0.449286	1.63765	-0.0329323
2.92e-08	0.190445	0.0334959	0.0228851	0.0218264		2.92e-08	-0.140097	1.52927	0.114877	-0.61316
2.9225e-08	0.206245	0.0351643	0.0245634	0.0204183		2.9225e-08	0.424968	0.187109	-0.432097	-0.333464
2.925e-08	0.186495	0.0334959	0.0257839	0.0218264		2.925e-08	0.173161	-1.30273	-0.980206	1.84284
2.9275e-08	0.20427	0.0319558	0.023648	0.0205943		2.9275e-08	0.830402	1.26044	1.73964	0.831203
2.93e-08	0.193549	0.0404261	0.02258	0.0204183		2.93e-08	-1.3335	0.928522	1.51965	1.63095
2.9325e-08	0.185084	0.0302875	0.0230377	0.0209463		2.9325e-08	0.50808	-2.01734	0.398403	-1.11156
2.935e-08	0.191574	0.0374743	0.0207492	0.0220024		2.935e-08	1.44092	0.262298	0.832273	1.50453
2.9375e-08	0.194395	0.0342659	0.0227325	0.0244667		2.9375e-08	-1.8241	0.364474	-0.456005	-0.290811
2.94e-08	0.183674	0.0340092	0.0256313	0.0205943		2.94e-08	-0.069349	-0.843914	1.86666	0.597385
2.9425e-08	0.199756	0.0355493	0.0242582	0.0216504		2.9425e-08	0.225205	-0.961475	0.823423	1.14019
2.945e-08	0.192138	0.0337526	0.0256313	0.0200662		2.945e-08	-0.303661	0.453098	2.24664	-1.00803
2.9475e-08	0.180006	0.0346509	0.0218171	0.0221785		2.9475e-08	0.632573	-0.393964	0.954559	1.53338
2.95e-08	0.181134	0.0351643	0.021512	0.0230586		2.95e-08	-0.539018	-0.950406	-1.74164	1.12142
2.9525e-08	0.181134	0.0332392	0.0201389	0.0195382		2.9525e-08	-1.07022	-1.36172	-2.04996	-0.945977
2.955e-08	0.192984	0.0350359	0.0245634	0.0244667		2.955e-08	-0.683596	-0.967904	-0.376479	1.77679
2.9575e-08	0.173799	0.0358059	0.0257839	0.0197142		2.9575e-08	1.35917	-1.82046	0.142611	1.10195
2.96e-08	0.183109	0.0315708	0.0239531	0.0204183		2.96e-08	0.92014	-0.545214	0.0833111	-0.360158
2.9625e-08	0.193266	0.0331109	0.0210543	0.0168979		2.9625e-08	2.23094	0.43861	-0.721729	-1.30058
2.965e-08	0.174363	0.0314425	0.021512	0.0207703		2.965e-08	0.131782	1.71883	0.544697	-1.80534
2.9675e-08	0.193266	0.0295174	0.021512	0.0211223		2.9675e-08	-0.125065	0.349592	-0.344525	-1.61048
2.97e-08	0.189881	0.0336242	0.0239531	0.0202422		2.97e-08	1.37309	-0.948844	0.343062	0.688479
2.9725e-08	0.189599	0.0349076	0.0212069	0.0242907		2.9725e-08	1.85668	-0.478276	1.36458	-0.25464
2.975e-08	0.182545	0.0320842	0.0254788	0.0216504		2.975e-08	1.87827	-0.893649	-0.19254	2.22543
2.9775e-08	0.183956	0.0325975	0.0218171	0.0214744		2.9775e-08	-2.08413	-0.644171	1.41354	0.402821
2.98e-08	0.179159	0.0319558	0.0239531	0.0216504		2.98e-08	-1.32435	-0.0980339	-0.31349	0.952335
2.9825e-08	0.183109	0.0302875	0.0219697	0.0190101		2.9825e-08	0.736248	-0.662893	-0.958627	1.23861
2.985e-08	0.190727	0.0288758	0.0178504	0.0205943		2.985e-08	0.292135	0.329496	0.233341	-0.237607
2.9875e-08	0.174927	0.0328542	0.0265467	0.0202422		2.9875e-08	1.79998	0.580985	1.92942	-0.304918
2.99e-08	0.187342	0.0297741	0.021512	0.0186581		2.99e-08	1.63519	1.42792	2.03796	0.157495
2.9925e-08	0.184802	0.0325975	0.0209017	0.0207703		2.9925e-08	-0.486323	-0.329112	0.638195	1.76989
2.995e-08	0.178313	0.0314425	0.0231903	0.0198902		2.995e-08	0.745127	-0.226715	-0.260993	1.08482
2.9975e-08	0.189317	0.0313142	0.0221223	0.0168979		2.9975e-08	0.672141	0.547276	1.27305	0.132734
3e-08	0.190163	0.0337526	0.0257839	0.0255228		3e-08	0.598965	-0.693654	-0.551891	0.508468
3.0025e-08	0.175209	0.0304158	0.021512	0.0205943		3.0025e-08	-0.0354254	-1.41396	-0.108977	1.15101
3.005e-08	0.186213	0.0316992	0.0207492	0.017602		3.005e-08	1.01356	-0.339713	0.41892	-0.603144
3.0075e-08	0.18452	0.0324692	0.0207492	0.0174259		3.0075e-08	-1.21419	0.961445	-0.738002	0.928349
3.01e-08	0.176902	0.0338809	0.0233428	0.0220024		3.01e-08	-0.0706924	-0.20963	0.21203	0.327274
3.0125e-08	0.170131	0.0288758	0.0212069	0.018306		3.0125e-08	0.136401	0.0432092	-0.102905	1.59522
3.015e-08	0.178877	0.0319558	0.0241057	0.0170739		3.015e-08	-0.313675	-1.20653	1.1876	1.79583
3.0175e-08	0.180006	0.0305441	0.0216646	0.0161938		3.0175e-08	1.02172	1.37789	0.534479	0.0339028
3.02e-08	0.183109	0.0288758	0.02258	0.0207703		3.02e-08	-0.651764	1.78367	0.134149	0.769194
3.0225e-08	0.187059	0.0302875	0.0172401	0.0234106		3.0225e-08	1.34501	1.21017	-0.182226	1.5058
3.025e-08	0.174363	0.037346	0.0222748	0.0211223		3.025e-08	-0.896982	-0.194771	-1.09325	0.0964298
3.0275e-08	0.180006	0.0308008	0.0262416	0.0195382		3.0275e-08	1.66927	-0.394001	0.202228	1.81875
3.03e-08	0.176902	0.0311858	0.0244108	0.0216504		3.03e-08	-0.387743	1.07001	0.564928	2.64782
3.0325e-08	0.174081	0.0318275	0.02258	0.0156657		3.0325e-08	1.52181	-1.70244	1.01335	0.876514
3.035e-08	0.172388	0.0331109	0.0245634	0.017954		3.035e-08	0.785481	-0.312685	-0.155812	0.808123
3.0375e-08	0.179724	0.0322125	0.0231903	0.0174259		3.0375e-08	-0.0469307	0.169568	-0.730429	1.00922
3.04e-08	0.169849	0.0302875	0.0218171	0.0193622		3.04e-08	0.635767	0.956539	0.998024	0.221013
3.0425e-08	0.180288	0.0301591	0.0205966	0.0193622		3.0425e-08	-1.05225	0.148709	-0.00376509	-0.20848
3.045e-08	0.170131	0.0322125	0.0218171	0.0204183		3.045e-08	0.580356	-1.49793	-0.750991	-1.26975
3.0475e-08	0.180852	0.036191	0.0227325	0.0188341		3.0475e-08	-0.445506	0.356091	0.725516	0.734404
3.05e-08	0.174363	0.0313142	0.0192235	0.0214744		3.05e-08	-0.141379	-0.0738105	-0.536553	-0.508661
3.0525e-08	0.178313	0.0343942	0.0244108	0.0190101		3.0525e-08	1.02025	1.09834	-0.772122	-0.940619
3.055e-08	0.167027	0.0288758	0.0201389	0.0234106		3.055e-08	-0.675347	1.58509	-1.17987	-1.28297
3.0575e-08	0.174081	0.0331109	0.0207492	0.0168979		3.0575e-08	0.297006	-0.222053	0.731142	0.909451
3.06e-08	0.185649	0.0325975	0.0202915	0.0165458		3.06e-08	0.602707	-2.26272	0.151952	2.10888
3.0625e-08	0.185367	0.0282341	0.0228851	0.0218264		3.0625e-08	0.717791	-0.47507	-0.0840818	0.498193
3.065e-08	0.177467	0.0315708	0.0210543	0.017778		3.065e-08	0.54609	-0.985699	0.885576	-0.843082
3.0675e-08	0.169849	0.0268224	0.0228851	0.0193622		3.0675e-08	-1.25356	-0.0380215	-0.0401722	-0.641797
3.07e-08	0.181134	0.0316992	0.0212069	0.0193622		3.07e-08	0.680813	0.21956	-1.22667	-0.349203
3.0725e-08	0.167874	0.0299025	0.0207492	0.0168979		3.0725e-08	1.08401	1.55519	-0.687455	-1.42192
3.075e-08	0.175492	0.0288758	0.0209017	0.01813		3.075e-08	-0.240166	1.04431	-1.09859	-0.0359521
3.0775e-08	0.176902	0.0283624	0.0231903	0.0209463		3.0775e-08	1.70024	0.30088	-0.298663	1.62617
3.08e-08	0.172388	0.0313142	0.0213594	0.0204183		3.08e-08	2.0091	0.791156	-0.0171734	-0.269621
3.0825e-08	0.169002	0.0296458	0.023648	0.0167219		3.0825e-08	1.83716	0.200326	0.178059	-0.798112
3.085e-08	0.178877	0.0278491	0.0218171	0.0184821		3.085e-08	0.0269183	1.38766	-1.01535	1.78245
3.0875e-08	0.173517	0.0318275	0.0195286	0.0184821		3.0875e-08	-1.30444	-0.985178	0.656383	-0.0269966
3.09e-08	0.174927	0.0311858	0.0181555	0.0209463		3.09e-08	-0.611237	3.45942	1.4615	0.817778
3.0925e-08	0.174645	0.0290041	0.0198338	0.017954		3.0925e-08	-0.882913	-1.24447	-0.343582	0.746829
3.095e-08	0.172952	0.0338809	0.0216646	0.0197142		3.095e-08	1.26235	0.800652	0.20063	1.59381
3.0975e-08	0.173799	0.0302875	0.0198338	0.0146096		3.0975e-08	-0.169624	1.29459	-0.126387	-0.773967
3.1e-08	0.165335	0.0278491	0.0219697	0.0165458		3.1e-08	1.4957	-2.64781	-0.803297	0.808888
3.1025e-08	0.166181	0.0265657	0.0198338	0.0184821		3.1025e-08	0.255168	-0.675981	-0.170769	-0.735513
3.105e-08	0.159127	0.0310575	0.0228851	0.0200662		3.105e-08	0.856246	-0.260325	1.86237	-0.439886
3.1075e-08	0.16477	0.0304158	0.0216646	0.0216504		3.1075e-08	0.389872	2.73296	1.97317	-1.80391
3.11e-08	0.15941	0.0290041	0.0219697	0.0188341		3.11e-08	1.28373	-0.755518	0.0685793	-1.69344
3.1125e-08	0.173517	0.0305441	0.0193761	0.0188341		3.1125e-08	0.13566	-1.12133	1.14267	-0.843616
3.115e-08	0.161667	0.0304158	0.0193761	0.017778		3.115e-08	0.738646	-0.469685	-0.941954	0.100218
3.1175e-08	0.175209	0.0293891	0.0196812	0.017954		3.1175e-08	1.73263	-1.85533	-0.130493	-0.898169
3.12e-08	0.169567	0.0297741	0.0218171	0.0197142		3.12e-08	-0.881809	0.13111	-1.25272	0.510545
3.1225e-08	0.180852	0.0288758	0.0198338	0.017602		3.1225e-08	-1.25481	-0.785459	-2.90538	0.994424
3.125e-08	0.169849	0.0291324	0.0176978	0.0153137		3.125e-08	-1.53077	0.0262812	-1.30046	0.829379
3.1275e-08	0.186213	0.027079	0.02258	0.0212984		3.1275e-08	1.4213	-0.420075	-0.839325	-0.915439
3.13e-08	0.179724	0.0299025	0.0202915	0.0172499		3.13e-08	0.167892	0.314704	-0.818864	-1.26863
3.1325e-08	0.178877	0.0274641	0.0209017	0.0163698		3.1325e-08	-0.891787	0.262005	-0.444916	0.145921
3.135e-08	0.164488	0.0273357	0.0219697	0.017778		3.135e-08	0.597179	0.840895	0.283523	0.724563
3.1375e-08	0.188752	0.0297741	0.0213594	0.0198902		3.1375e-08	2.97247	-1.26681	1.19037	-1.2134
3.14e-08	0.163642	0.0269507	0.0157144	0.017954		3.14e-08	1.22443	0.73597	-1.44612	-0.355012
3.1425e-08	0.178313	0.0241273	0.0166299	0.0168979		3.1425e-08	0.260131	1.55462	-0.273125	0.50491
3.145e-08	0.171259	0.0278491	0.016935	0.0188341		3.145e-08	0.573948	0.551162	-0.0746732	-0.129635
3.1475e-08	0.169849	0.0288758	0.0216646	0.0160178		3.1475e-08	0.789748	0.498078	0.746226	1.76143
3.15e-08	0.182545	0.0275924	0.0202915	0.0184821		3.15e-08	0.118233	0.285894	0.0563223	0.564749
3.1525e-08	0.17662	0.0283624	0.0183081	0.0160178		3.1525e-08	-0.653256	0.391326	-0.991104	0.95968
3.155e-08	0.169849	0.0245123	0.0202915	0.0200662		3.155e-08	0.0558924	0.496881	1.70265	0.0414967
3.1575e-08	0.166181	0.027079	0.0192235	0.0168979		3.1575e-08	-1.1127	-0.353798	1.90358	-0.220923
3.16e-08	0.173234	0.0272074	0.0187658	0.01813		3.16e-08	0.784992	0.229739	-0.12742	0.268227
3.1625e-08	0.172952	0.0268224	0.0181555	0.0172499		3.1625e-08	0.902794	-0.94249	-0.464153	0.193653
3.165e-08	0.157999	0.0281057	0.0195286	0.017778		3.165e-08	-0.367432	1.32029	0.271937	-1.10545
3.1675e-08	0.165617	0.0275924	0.0201389	0.017778		3.1675e-08	-1.34221	0.546814	0.29305	0.0440161
3.17e-08	0.164488	0.0275924	0.0202915	0.0184821		3.17e-08	0.263953	0.572751	-1.65756	-0.219755
3.1725e-08	0.161667	0.0284908	0.0210543	0.0158418		3.1725e-08	0.481017	-0.443712	-0.11326	0.932526
3.175e-08	0.161385	0.0299025	0.016935	0.0204183		3.175e-08	-0.197195	-0.820195	0.0869966	0.763512
3.1775e-08	0.166181	0.0233573	0.0172401	0.0195382		3.1775e-08	0.816555	-1.03684	-1.33019	0.404912
3.18e-08	0.172388	0.0306725	0.0184607	0.0154897		3.18e-08	-0.361125	1.48054	1.11814	1.84481
3.1825e-08	0.163924	0.0261807	0.0228851	0.0168979		3.1825e-08	-0.0442649	-1.63271	-0.120762	2.24467
3.185e-08	0.161949	0.025924	0.0202915	0.0167219		3.185e-08	1.5714	-1.04515	-0.100253	0.0838271
3.1875e-08	0.163924	0.0264374	0.0173927	0.0161938		3.1875e-08	0.591042	-0.13376	-0.169952	-0.181919
3.19e-08	0.172952	0.0252823	0.0233428	0.0156657		3.19e-08	0.809457	1.82922	0.663122	-0.163061
3.1925e-08	0.156306	0.0277207	0.0167824	0.0163698		3.1925e-08	0.0268918	0.805242	-0.129075	0.52167
3.195e-08	0.166181	0.0282341	0.0184607	0.0147856		3.195e-08	0.345365	0.588315	-1.01324	-0.220533
3.1975e-08	0.153767	0.0295174	0.0228851	0.0167219		3.1975e-08	0.965307	-2.30206	1.17945	-0.0111633
3.2e-08	0.16082	0.0257957	0.0205966	0.0193622		3.2e-08	0.180675	0.315106	-1.33657	1.34311
3.2025e-08	0.163642	0.0274641	0.0212069	0.0163698		3.2025e-08	0.499999	0.340283	-0.500934	0.981357
3.205e-08	0.156588	0.0275924	0.015867	0.017954		3.205e-08	-0.387128	-1.50319	-1.93375	0.141122
3.2075e-08	0.154049	0.0272074	0.0210543	0.0191861		3.2075e-08	-0.470516	1.61042	0.81129	-0.700676
3.21e-08	0.175774	0.0283624	0.0218171	0.0147856		3.21e-08	-0.856366	0.497043	-0.259198	0.179032
3.2125e-08	0.157999	0.0248973	0.0202915	0.0167219		3.2125e-08	-0.133598	-0.211175	-0.603305	-0.0894501
3.215e-08	0.169285	0.0268224	0.0170876	0.0209463		3.215e-08	-0.519888	0.221139	-0.31014	0.696436
3.2175e-08	0.15687	0.025539	0.016935	0.0130254		3.2175e-08	-1.20997	-0.407204	-0.0164599	0.619852
3.22e-08	0.155177	0.0256673	0.0173927	0.0140816		3.22e-08	0.727738	0.434384	-0.909207	-0.609751
3.2225e-08	0.159127	0.025154	0.018003	0.0153137		3.2225e-08	-0.67097	-0.195109	-0.981164	-0.30309
3.225e-08	0.148688	0.023999	0.021512	0.0142576		3.225e-08	-0.147575	0.156853	0.684662	-0.477146
3.2275e-08	0.161102	0.0274641	0.0222748	0.0184821		3.2275e-08	1.0864	0.427454	0.247701	-0.555241
3.23e-08	0.152356	0.0260524	0.0198338	0.0167219		3.23e-08	1.00332	-0.696582	-0.923258	-0.63353
3.2325e-08	0.14897	0.0216889	0.0189184	0.0147856		3.2325e-08	-0.0956008	-1.16577	-0.720548	0.542536
3.235e-08	0.148406	0.0278491	0.0181555	0.0140816		3.235e-08	-0.891538	-1.80042	-0.609318	0.0786437
3.2375e-08	0.156024	0.0245123	0.0212069	0.0170739		3.2375e-08	0.854711	-0.131676	-0.497919	-0.579465
3.24e-08	0.160538	0.0260524	0.0199863	0.0149617		3.24e-08	0.770995	1.1284	-0.93822	0.309428
3.2425e-08	0.159692	0.024384	0.016935	0.0197142		3.2425e-08	1.29866	0.164126	-0.826975	1.10304
3.245e-08	0.168156	0.0290041	0.0198338	0.0158418		3.245e-08	-0.315089	-0.141657	-0.346959	0.347062
3.2475e-08	0.162231	0.027079	0.0175453	0.0160178		3.2475e-08	-0.706464	-0.282828	0.502837	-0.313291
3.25e-08	0.166463	0.025539	0.021512	0.0190101		3.25e-08	1.96729	0.651055	0.523272	-0.586435
3.2525e-08	0.170413	0.0242556	0.0181555	0.0197142		3.2525e-08	1.37257	1.3383	0.0816594	1.27823
3.255e-08	0.161385	0.024769	0.021512	0.0163698		3.255e-08	0.981501	-0.708512	-0.730783	-0.745215
3.2575e-08	0.157152	0.025154	0.018003	0.0191861		3.2575e-08	-0.0250961	0.144532	1.0473	0.0514529
3.26e-08	0.153767	0.0281057	0.0189184	0.0167219		3.26e-08	-0.31561	2.16198	-0.043824	0.362213
3.2625e-08	0.162231	0.024769	0.0186132	0.0139055		3.2625e-08	-0.0934334	1.2736	-1.69345	-0.106868
3.265e-08	0.165899	0.0265657	0.0151042	0.0170739		3.265e-08	-0.0763626	0.799508	0.274201	1.47347
3.2675e-08	0.162231	0.0237423	0.0157144	0.0147856		3.2675e-08	0.660506	0.157834	-1.19239	0.418176
3.27e-08	0.151792	0.0228439	0.0173927	0.0140816		3.27e-08	0.266551	-1.06886	-0.708717	-0.736847
3.2725e-08	0.156024	0.0245123	0.0190709	0.0165458		3.2725e-08	-0.952203	1.0407	1.54443	0.16182
3.275e-08	0.156588	0.0250257	0.0202915	0.0142576		3.275e-08	1.43533	-0.772557	0.633851	1.06204
3.2775e-08	0.145303	0.0216889	0.0176978	0.0144336		3.2775e-08	0.31855	1.25772	0.281076	1.47347
3.28e-08	0.163642	0.0256673	0.0181555	0.0160178		3.28e-08	0.645688	0.529236	0.767667	0.609533
3.2825e-08	0.150099	0.0288758	0.016935	0.0149617		3.2825e-08	-0.990695	-0.703574	2.00251	0.628208
3.285e-08	0.159974	0.025924	0.016935	0.0144336		3.285e-08	0.784256	-0.00954301	-0.594437	0.155218
3.2875e-08	0.14502	0.0260524	0.0161721	0.0174259		3.2875e-08	0.0770301	-0.489729	1.10933	-0.712324
3.29e-08	0.147842	0.025539	0.0176978	0.0144336		3.29e-08	-0.320531	-2.14762	-0.743786	0.388705
3.2925e-08	0.154331	0.0246407	0.0170876	0.0170739		3.2925e-08	0.00732982	-1.36893	0.869141	0.801509
3.295e-08	0.159692	0.0241273	0.018003	0.0168979		3.295e-08	-1.63695	0.506095	-1.26921	0.326875
3.2975e-08	0.156306	0.0241273	0.0189184	0.017954		3.2975e-08	0.45686	-0.312858	0.158234	1.728
3.3e-08	0.156024	0.0245123	0.0172401	0.0174259		3.3e-08	-0.253917	-0.627197	0.365891	-1.11935
3.3025e-08	0.152074	0.0210472	0.0151042	0.0135535		3.3025e-08	-0.029096	-0.350959	-1.30839	-1.99288
3.305e-08	0.147278	0.024384	0.0151042	0.0153137		3.305e-08	0.300262	-1.17343	1.44155	1.29141
3.3075e-08	0.14502	0.0248973	0.0160196	0.0149617		3.3075e-08	0.525872	-0.389522	-1.08348	0.0218806
3.31e-08	0.14502	0.0275924	0.0178504	0.0168979		3.31e-08	-0.605003	-0.53603	-0.310185	2.02399
3.3125e-08	0.16477	0.0252823	0.0192235	0.0158418		3.3125e-08	2.33621	-1.3613	-1.5191	0.653481
3.315e-08	0.14756	0.0228439	0.015867	0.0147856		3.315e-08	2.77322	-0.235835	-0.744858	0.174993
3.3175e-08	0.157717	0.0211756	0.0154093	0.017778		3.3175e-08	-1.3935	-1.74227	-0.0638578	0.690374
3.32e-08	0.150099	0.0242556	0.0189184	0.0146096		3.32e-08	1.44995	-0.529972	-1.27594	0.70883
3.3225e-08	0.14502	0.025154	0.0176978	0.0160178		3.3225e-08	-1.15283	0.173837	-3.05909	-0.0699272
3.325e-08	0.143892	0.0229723	0.0207492	0.0130254		3.325e-08	1.17112	-1.42204	-0.765361	-2.3462
3.3275e-08	0.150099	0.0225873	0.0209017	0.0172499		3.3275e-08	-0.70146	-0.0354213	-0.556942	-0.733285
3.33e-08	0.14897	0.0265657	0.0170876	0.0154897		3.33e-08	-1.10588	0.414559	-1.01362	0.782523
3.3325e-08	0.154331	0.0260524	0.015867	0.0146096		3.3325e-08	1.01367	0.437982	-0.424571	2.20096
3.335e-08	0.147278	0.0229723	0.0176978	0.017954		3.335e-08	-0.127052	-1.33533	-0.405888	1.41983
3.3375e-08	0.143892	0.0224589	0.0175453	0.01813		3.3375e-08	0.62705	-0.0290451	0.280031	1.1382
3.34e-08	0.142481	0.0213039	0.015867	0.0153137		3.34e-08	1.48792	0.593963	-0.559326	-0.848549
3.3425e-08	0.139942	0.0273357	0.0172401	0.0142576		3.3425e-08	0.133416	-0.841303	0.891588	-0.129155
3.345e-08	0.148688	0.025539	0.0143413	0.0163698		3.345e-08	-0.589537	0.641018	-0.904587	-0.915223
3.3475e-08	0.154331	0.0223306	0.0167824	0.0151377		3.3475e-08	0.695436	-0.281238	-1.46041	1.01176
3.35e-08	0.151227	0.0261807	0.0157144	0.0151377		3.35e-08	-0.557567	-0.344731	-0.389485	1.83522
3.3525e-08	0.158281	0.0265657	0.0189184	0.0137295		3.3525e-08	-0.0119438	-0.494576	3.07931	0.343672
3.355e-08	0.144738	0.0231006	0.0172401	0.0153137		3.355e-08	2.01893	2.20091	-0.448294	0.462278
3.3575e-08	0.145585	0.0246407	0.016935	0.0149617		3.3575e-08	0.126967	0.240446	-1.00593	0.379266
3.36e-08	0.143328	0.0241273	0.0146465	0.0132015		3.36e-08	0.568282	0.00413229	-0.123112	-0.309811
3.3625e-08	0.148124	0.0215606	0.0166299	0.0146096		3.3625e-08	-1.4346	-0.492148	-1.54722	-0.899062
3.365e-08	0.149253	0.0257957	0.0178504	0.0132015		3.365e-08	0.282803	0.222567	0.684486	0.0279973
3.3675e-08	0.149817	0.0225873	0.0166299	0.0149617		3.3675e-08	0.299388	-0.534506	0.607536	1.36166
3.37e-08	0.144738	0.0234856	0.0184607	0.0160178		3.37e-08	0.635714	1.48262	-0.14472	-0.0384454
3.3725e-08	0.136838	0.025924	0.0193761	0.0160178		3.3725e-08	1.18594	-0.664012	0.163514	2.00743
3.375e-08	0.156588	0.0225873	0.0184607	0.0128494		3.375e-08	-1.14557	-0.815958	0.858747	1.41746
3.3775e-08	0.149253	0.0225873	0.0173927	0.017602		3.3775e-08	-0.168597	-2.09922	-0.959287	0.7248
3.38e-08	0.158563	0.0238706	0.0184607	0.0128494		3.38e-08	1.66562	1.05605	-1.1351	0.844419
3.3825e-08	0.15941	0.0202772	0.0173927	0.0146096		3.3825e-08	-0.0294202	2.29977	0.723295	-0.155411
3.385e-08	0.14361	0.0241273	0.0161721	0.0156657		3.385e-08	-0.977487	0.841092	-0.615071	2.00101
3.3875e-08	0.137685	0.0264374	0.0172401	0.017602		3.3875e-08	-0.53326	-0.0964617	-0.694111	0.286642
3.39e-08	0.146431	0.023614	0.014799	0.0102091		3.39e-08	0.126355	0.275434	-0.48188	-0.512301
3.3925e-08	0.150663	0.0233573	0.0160196	0.0151377		3.3925e-08	-1.36118	-0.402048	0.0224133	0.525869
3.395e-08	0.134017	0.0234856	0.0176978	0.0139055		3.395e-08	-1.77625	-0.029792	0.819554	-0.274318
3.3975e-08	0.152356	0.0205339	0.014799	0.0158418		3.3975e-08	0.605527	-0.0952433	-0.0378735	-0.05274
3.4e-08	0.141917	0.0245123	0.016935	0.0146096		3.4e-08	-0.239403	-1.12627	-0.994395	-0.650101
3.4025e-08	0.146713	0.023999	0.0155619	0.0151377		3.4025e-08	-0.762483	2.32084	-0.97684	1.00645
3.405e-08	0.148688	0.0223306	0.0160196	0.0132015		3.405e-08	0.871081	-0.116923	1.67786	0.306277
3.4075e-08	0.144174	0.0225873	0.0164773	0.017778		3.4075e-08	2.39945	1.04926	-0.452986	-0.0871232
3.41e-08	0.144738	0.0233573	0.0184607	0.0160178		3.41e-08	-1.25673	0.0150599	-3.27264	-0.0701686
3.4125e-08	0.138813	0.0260524	0.0210543	0.0154897		3.4125e-08	2.76005	0.478026	0.170531	-0.258932
3.415e-08	0.150381	0.0216889	0.0138836	0.0151377		3.415e-08	1.04635	-1.17673	0.679136	-1.78639
3.4175e-08	0.144174	0.023614	0.0160196	0.0130254		3.4175e-08	2.03833	-0.802447	1.28674	0.908076
3.42e-08	0.145303	0.0232289	0.0183081	0.0151377		3.42e-08	0.321002	1.16456	-1.1488	0.822732
3.4225e-08	0.157152	0.0198922	0.014799	0.0133775		3.4225e-08	0.445742	0.0367178	-0.246944	-2.04974
3.425e-08	0.144174	0.0196355	0.015867	0.0153137		3.425e-08	0.244775	0.147271	-1.21268	0.0316163
3.4275e-08	0.141635	0.0204055	0.018003	0.0130254		3.4275e-08	0.0434164	-0.895183	-0.210895	1.49616
3.43e-08	0.143892	0.0246407	0.0141888	0.0160178		3.43e-08	-0.375963	0.457586	1.58106	1.41085
3.4325e-08	0.14107	0.0232289	0.015867	0.0139055		3.4325e-08	0.401888	0.746405	1.40334	2.05041
3.435e-08	0.132606	0.0229723	0.0172401	0.0137295		3.435e-08	-0.453984	-1.72206	-0.255685	-2.49252
3.4375e-08	0.134017	0.0227156	0.0164773	0.0142576		3.4375e-08	0.761465	0.613195	-1.02835	1.77636
3.44e-08	0.139942	0.0231006	0.0163247	0.0112653		3.44e-08	-0.750758	0.368078	-0.714444	-0.178482
3.4425e-08	0.148406	0.0197639	0.0163247	0.0137295		3.4425e-08	-0.298498	-0.858953	1.5799	0.87759
3.445e-08	0.138531	0.0210472	0.0131208	0.0137295		3.445e-08	0.263896	1.0373	0.90581	-2.0178
3.4475e-08	0.137403	0.0204055	0.0151042	0.0147856		3.4475e-08	-0.376966	-0.370329	-1.25711	0.600319
3.45e-08	0.150663	0.0218172	0.0167824	0.0128494		3.45e-08	0.734092	-0.885959	2.13467	-0.424572
3.4525e-08	0.141353	0.024384	0.0166299	0.0170739		3.4525e-08	-2.32009	0.567759	0.863027	-2.70297
3.455e-08	0.143328	0.0198922	0.0163247	0.0144336		3.455e-08	1.64475	-1.47216	0.185683	0.338859
3.4575e-08	0.139942	0.0209189	0.0138836	0.0144336		3.4575e-08	0.783004	0.432342	-0.492916	0.355799
3.46e-08	0.132042	0.0191222	0.0134259	0.0149617		3.46e-08	-0.300142	0.544001	-0.973532	1.31394
3.4625e-08	0.141635	0.0234856	0.0173927	0.0119693		3.4625e-08	1.4758	-0.423079	-1.15592	0.808347
3.465e-08	0.137967	0.0227156	0.0152567	0.0123214		3.465e-08	-0.159314	0.227875	-1.23887	0.616134
3.4675e-08	0.134581	0.0225873	0.0173927	0.0128494		3.4675e-08	-0.805222	-0.741433	0.376019	-0.939502
3.47e-08	0.136838	0.0206622	0.0151042	0.0142576		3.47e-08	0.4232	-0.630611	-0.205615	1.07018
3.4725e-08	0.136274	0.0201489	0.014799	0.0163698		3.4725e-08	-0.333787	-0.429365	-1.18857	0.877607
3.475e-08	0.130067	0.0196355	0.0126631	0.0124974		3.475e-08	0.0129949	0.585292	0.330431	-0.156341
3.4775e-08	0.133735	0.0224589	0.0134259	0.0167219		3.4775e-08	1.02396	0.787959	-0.954614	0.491328
3.48e-08	0.129221	0.0231006	0.0152567	0.0132015		3.48e-08	-0.398787	2.43921	1.16917	1.66661
3.4825e-08	0.125835	0.0211756	0.0152567	0.0112653		3.4825e-08	-0.605266	-0.70841	0.284151	0.208921
3.485e-08	0.135428	0.0224589	0.0163247	0.0121453		3.485e-08	0.518549	1.48859	0.503099	-1.46231
3.4875e-08	0.131195	0.0202772	0.015867	0.0156657		3.4875e-08	-0.0205077	0.512582	0.320022	1.6147
3.49e-08	0.128656	0.0214322	0.0129682	0.0140816		3.49e-08	1.43892	-1.37397	0.0359084	-1.64335
3.4925e-08	0.137685	0.0198922	0.0157144	0.0144336		3.4925e-08	-0.656753	-0.899444	1.66599	0.804207
3.495e-08	0.140506	0.0204055	0.0120528	0.0123214		3.495e-08	0.359513	0.577374	0.575601	-0.766549
3.4975e-08	0.138813	0.0211756	0.014799	0.0137295		3.4975e-08	0.709299	-0.130027	-2.13203	1.15622
3.5e-08	0.124706	0.0179671	0.0131208	0.0135535		3.5e-08	0.948184	-1.11248	0.00558704	2.65813
3.5025e-08	0.129503	0.0228439	0.015867	0.0151377		3.5025e-08	-0.151234	-0.270894	-0.0779892	-0.719472
3.505e-08	0.13966	0.0189938	0.0167824	0.0163698		3.505e-08	-1.02927	0.115301	0.040681	0.783313
3.5075e-08	0.12386	0.0228439	0.0151042	0.0133775		3.5075e-08	0.437826	0.136276	0.159516	0.587614
3.51e-08	0.143328	0.0206622	0.0140362	0.0144336		3.51e-08	-0.776799	0.70661	-0.0256817	0.604356
3.5125e-08	0.132042	0.0215606	0.0131208	0.0144336		3.5125e-08	-0.090594	1.0947	-1.53063	-0.443887
3.515e-08	0.132324	0.0210472	0.0175453	0.0149617		3.515e-08	0.0366	-1.45206	1.32975	-0.00169337
3.5175e-08	0.144456	0.0238706	0.0166299	0.0149617		3.5175e-08	1.06102	-0.23894	-2.4135	0.974659
3.52e-08	0.13712	0.0204055	0.0166299	0.0124974		3.52e-08	0.179355	0.608817	1.36698	-0.609927
3.5225e-08	0.132888	0.0210472	0.0154093	0.0142576		3.5225e-08	0.756313	0.538159	1.08004	-1.76982
3.525e-08	0.140224	0.0213039	0.014799	0.0146096		3.525e-08	1.2218	0.375218	0.28283	-1.64823
3.5275e-08	0.126117	0.0188655	0.0141888	0.0139055		3.5275e-08	-0.22465	1.87103	1.11668	-0.777118
3.53e-08	0.124424	0.0219456	0.0157144	0.0128494		3.53e-08	-0.209716	-1.15121	0.624354	0.952607
3.5325e-08	0.135145	0.0196355	0.015867	0.0142576		3.5325e-08	-0.645604	0.253522	1.86873	0.326073
3.535e-08	0.126963	0.0183522	0.0143413	0.0116173		3.535e-08	0.609714	-0.372744	-0.260728	-0.945546
3.5375e-08	0.135428	0.0202772	0.0178504	0.0109132		3.5375e-08	-0.0520613	-1.09276	-1.16526	0.466146
3.54e-08	0.12386	0.0180955	0.0143413	0.0167219		3.54e-08	-0.150031	0.686368	2.02793	0.482572
3.5425e-08	0.129785	0.0196355	0.0138836	0.0137295		3.5425e-08	0.882681	0.336733	-0.517403	1.46746
3.545e-08	0.130631	0.0198922	0.0164773	0.0117933		3.545e-08	0.898482	0.635923	0.11534	0.94624
3.5475e-08	0.146995	0.0186088	0.0189184	0.0126734		3.5475e-08	-1.01147	1.02851	0.132635	0.747462
3.55e-08	0.134017	0.0197639	0.0137311	0.0161938		3.55e-08	-0.997318	0.0273092	-0.672851	1.41137
3.5525e-08	0.130349	0.0173255	0.0157144	0.0128494		3.5525e-08	-0.0754093	-1.9064	0.784794	-1.05495
3.555e-08	0.138531	0.0170688	0.0111374	0.0144336		3.555e-08	-0.628362	-0.118172	0.699551	-0.28347
3.5575e-08	0.12781	0.0205339	0.0166299	0.0119693		3.5575e-08	1.20467	-0.191211	0.614113	0.921952
3.56e-08	0.127246	0.0211756	0.0135785	0.00950506		3.56e-08	1.44812	0.575428	-1.32926	-0.252209
3.5625e-08	0.126681	0.0188655	0.0128157	0.0116173		3.5625e-08	-0.471322	-0.89827	-2.34639	-0.0198832
3.565e-08	0.133735	0.0214322	0.0131208	0.0142576		3.565e-08	0.340851	0.0560724	0.253315	-0.329386
3.5675e-08	0.131478	0.0219456	0.0137311	0.0132015		3.5675e-08	-2.38119	1.48011	0.374034	-0.313838
3.57e-08	0.130067	0.0205339	0.0149516	0.00915302		3.57e-08	0.142916	0.658693	1.11637	-0.732796
3.5725e-08	0.123013	0.0189938	0.012358	0.0130254		3.5725e-08	0.614878	-0.633127	-0.00595539	-0.826342
3.575e-08	0.128092	0.0183522	0.0157144	0.0139055		3.575e-08	0.973263	0.0433792	0.11475	-1.46416
3.5775e-08	0.134581	0.0228439	0.0157144	0.0117933		3.5775e-08	0.30227	0.25141	-0.802837	-0.796221
3.58e-08	0.126681	0.0200205	0.0154093	0.0144336		3.58e-08	0.431845	1.11795	1.70782	-1.65319
3.5825e-08	0.133453	0.0179671	0.0152567	0.0151377		3.5825e-08	1.47866	0.950804	0.269791	-1.42073
3.585e-08	0.132324	0.0202772	0.0140362	0.0135535		3.585e-08	1.83884	-0.535553	0.286866	-0.860332
3.5875e-08	0.13317	0.0159138	0.0144939	0.0137295		3.5875e-08	0.936522	0.521141	2.07551	-1.28253
3.59e-08	0.119628	0.0168121	0.014799	0.0132015		3.59e-08	1.29681	0.164083	0.529629	-0.283603
3.5925e-08	0.123296	0.0188655	0.0144939	0.0154897		3.5925e-08	0.852547	-0.477086	-0.183846	2.57797
3.595e-08	0.130067	0.0198922	0.0144939	0.0149617		3.595e-08	0.637746	-0.457581	-0.0627229	-0.143227
3.5975e-08	0.130631	0.0201489	0.0144939	0.0103852		3.5975e-08	0.998627	0.603048	0.895188	-0.237383
3.6e-08	0.125271	0.0200205	0.0143413	0.0140816		3.6e-08	-0.254292	0.055083	0.703389	-0.880486
3.6025e-08	0.123578	0.0171971	0.0143413	0.0124974		3.6025e-08	-0.355272	1.2129	-0.431629	0.3426
3.605e-08	0.131195	0.0187372	0.0157144	0.0123214		3.605e-08	1.85368	0.28468	0.633187	0.688238
3.6075e-08	0.133735	0.0180955	0.0120528	0.0149617		3.6075e-08	0.598191	0.209704	0.965225	-0.616031
3.61e-08	0.126117	0.0205339	0.014799	0.0130254		3.61e-08	0.613275	-1.38696	-0.592808	-0.0504407
3.6125e-08	0.117371	0.0165554	0.0131208	0.0124974		3.6125e-08	1.67056	0.344751	0.474558	0.956963
3.615e-08	0.121321	0.0160421	0.0125105	0.0109132		3.615e-08	-0.515521	0.841143	0.175935	2.07638
3.6175e-08	0.134299	0.0200205	0.0143413	0.0142576		3.6175e-08	-0.5014	-3.14356	-0.228541	0.216707
3.62e-08	0.134863	0.0189938	0.0167824	0.0102091		3.62e-08	1.48631	1.16848	1.47429	0.12185
3.6225e-08	0.123578	0.0171971	0.0126631	0.0135535		3.6225e-08	0.223991	0.424917	-0.934204	1.02216
3.625e-08	0.126681	0.0200205	0.0163247	0.0132015		3.625e-08	2.09931	0.0624201	0.0318073	-1.28603
3.6275e-08	0.11991	0.0173255	0.0135785	0.0126734		3.6275e-08	0.951692	-0.109381	-0.374359	0.390013
3.63e-08	0.115113	0.0173255	0.012358	0.0139055		3.63e-08	-0.0814159	-1.71871	-1.31013	-0.481321
3.6325e-08	0.125835	0.0152721	0.0140362	0.0130254		3.6325e-08	0.515862	-1.12542	0.504846	-0.133481
3.635e-08	0.138813	0.0201489	0.0109849	0.0116173		3.635e-08	-0.869457	-0.0511278	0.203861	0.325988
3.6375e-08	0.124142	0.0182238	0.0143413	0.00968108		3.6375e-08	-0.388666	-0.800347	-0.0976754	-0.65888
3.64e-08	0.121603	0.0152721	0.0131208	0.0133775		3.64e-08	2.07983	0.564704	-1.46115	1.69222
3.6425e-08	0.128092	0.0170688	0.0164773	0.0140816		3.6425e-08	0.224362	0.10338	-0.277465	-0.51805
3.645e-08	0.119628	0.0160421	0.0149516	0.00985709		3.645e-08	-0.463507	-0.551534	0.376641	1.16847
3.6475e-08	0.130067	0.0169404	0.0126631	0.0124974		3.6475e-08	0.0191625	-0.821962	-0.245149	2.18858
3.65e-08	0.116806	0.0175821	0.0129682	0.0133775		3.65e-08	3.08257	0.837616	1.04911	1.87078
3.6525e-08	0.125553	0.0180955	0.0134259	0.0112653		3.6525e-08	0.869461	-0.108466	-0.319485	-0.905657
3.655e-08	0.122731	0.0198922	0.0137311	0.0124974		3.655e-08	0.179677	-0.0892903	0.656781	-0.667595
3.6575e-08	0.125553	0.0178388	0.0115951	0.0121453		3.6575e-08	0.429233	-1.52211	-2.10286	-0.541084
3.66e-08	0.126117	0.0170688	0.0129682	0.0119693		3.66e-08	0.796845	0.821012	-1.44716	0.593739
3.6625e-08	0.117653	0.0184805	0.0126631	0.0109132		3.6625e-08	-1.54352	1.51982	-0.362453	0.497263
3.665e-08	0.115396	0.0160421	0.0122054	0.0102091		3.665e-08	0.473092	-0.109744	-1.096	-0.833641
3.6675e-08	0.128374	0.0188655	0.0152567	0.0151377		3.6675e-08	-0.455968	-1.45089	-0.544944	4.23424
3.67e-08	0.124988	0.0162988	0.0175453	0.0121453		3.67e-08	1.5649	1.09542	-1.06547	1.66786
3.6725e-08	0.132324	0.0160421	0.0126631	0.0130254		3.6725e-08	2.28938	-1.0259	-1.69427	1.45939
3.675e-08	0.129503	0.0175821	0.0154093	0.0132015		3.675e-08	-0.887491	-0.715457	-0.6052	-1.90187
3.6775e-08	0.126963	0.0180955	0.0126631	0.0110892		3.6775e-08	-1.22915	-1.47723	0.270655	-0.31091
3.68e-08	0.129503	0.0187372	0.0138836	0.0103852		3.68e-08	-0.0314699	-0.678681	0.0717391	-0.634492
3.6825e-08	0.127528	0.0189938	0.0128157	0.0128494		3.6825e-08	0.101175	0.512106	-0.0198441	-0.281428
3.685e-08	0.117935	0.0159138	0.0132734	0.0102091		3.685e-08	-0.240606	1.21609	-2.26783	1.20187
3.6875e-08	0.126681	0.0160421	0.0119003	0.0124974		3.6875e-08	0.248298	1.33405	1.52288	-0.0258388
3.69e-08	0.125553	0.0195072	0.0141888	0.0142576		3.69e-08	0.738003	0.668401	2.8362	-0.124067
3.6925e-08	0.112856	0.0183522	0.0126631	0.0147856		3.6925e-08	1.10956	0.589884	-0.171857	0.457041
3.695e-08	0.140506	0.0168121	0.0108323	0.0140816		3.695e-08	1.36266	-0.666683	0.925856	-0.774478
3.6975e-08	0.119628	0.0197639	0.0115951	0.0126734		3.6975e-08	-1.4818	-1.53263	0.834379	0.14735
3.7e-08	0.121885	0.0184805	0.0128157	0.0130254		3.7e-08	3.18182	-0.335134	-0.124271	0.162371
3.7025e-08	0.110599	0.0202772	0.0125105	0.0112653		3.7025e-08	1.05015	0.273947	-1.41002	0.177376
3.705e-08	0.130913	0.0169404	0.015867	0.0114413		3.705e-08	-1.44346	-0.199629	0.558732	0.533564
3.7075e-08	0.123013	0.0161704	0.0149516	0.0116173		3.7075e-08	-0.713401	-0.674132	-0.620081	-1.1586
3.71e-08	0.123296	0.0170688	0.0119003	0.0105612		3.71e-08	-0.3411	-1.24825	0.700206	0.678019
3.7125e-08	0.124988	0.0162988	0.0137311	0.0107372		3.7125e-08	0.750302	-1.23071	-0.698259	-0.446827
3.715e-08	0.117088	0.014117	0.0143413	0.0123214		3.715e-08	0.525155	1.06119	0.950995	2.30638
3.7175e-08	0.124988	0.0147587	0.0128157	0.0105612		3.7175e-08	-1.01984	1.67471	0.0954308	-0.760647
3.72e-08	0.117935	0.0175821	0.0128157	0.0102091		3.72e-08	-0.406521	-1.77244	0.766076	0.282265
3.7225e-08	0.125271	0.0196355	0.0108323	0.0107372		3.7225e-08	1.52945	0.227752	-1.29256	2.01334
3.725e-08	0.117935	0.0150154	0.0105272	0.0124974		3.725e-08	-0.49966	1.73534	-0.0754723	-1.1763
3.7275e-08	0.128938	0.0166838	0.0132734	0.0116173		3.7275e-08	-0.125171	-0.628708	0.377837	-0.474992
3.73e-08	0.112292	0.0148871	0.0106797	0.0124974		3.73e-08	0.972613	-0.0141566	0.393886	1.03032
3.7325e-08	0.117088	0.0169404	0.0151042	0.0121453		3.7325e-08	0.746127	1.59673	-1.34356	0.471877
3.735e-08	0.124988	0.0188655	0.012358	0.0124974		3.735e-08	2.08771	-0.674519	-1.76779	0.257133
3.7375e-08	0.11991	0.0152721	0.0122054	0.0121453		3.7375e-08	-0.915573	1.5369	0.990899	1.99674
3.74e-08	0.116242	0.0154004	0.00945918	0.0112653		3.74e-08	2.48131	-1.23764	1.9963	-0.633831
3.7425e-08	0.119346	0.0202772	0.0125105	0.0119693		3.7425e-08	-0.768586	0.777491	1.1339	0.186494
3.745e-08	0.121038	0.0160421	0.0154093	0.0124974		3.745e-08	1.78667	-0.60314	-0.170255	-1.41259
3.7475e-08	0.121038	0.0156571	0.0125105	0.00968108		3.7475e-08	0.105738	0.515544	-2.02749	-2.43754
3.75e-08	0.117371	0.0193788	0.0144939	0.0112653		3.75e-08	2.4234	-1.96981	-0.139302	-1.84768
3.7525e-08	0.107496	0.0139887	0.0120528	0.0139055		3.7525e-08	-0.109358	0.051909	-1.00664	-1.02574
3.755e-08	0.108342	0.0146304	0.0134259	0.0107372		3.755e-08	-0.581598	-0.933274	0.55425	-0.433775
3.7575e-08	0.119063	0.0145021	0.0115951	0.0128494		3.7575e-08	-0.568424	1.19344	-1.64053	0.506426
3.76e-08	0.119063	0.0169404	0.0128157	0.0123214		3.76e-08	0.0530391	-0.596876	-0.40947	-0.521388
3.7625e-08	0.117371	0.0155287	0.00991688	0.0130254		3.7625e-08	-1.27264	-1.88737	0.380763	1.92767
3.765e-08	0.125553	0.0160421	0.0137311	0.00827292		3.765e-08	0.445979	0.747829	2.05892	0.899277
3.7675e-08	0.121885	0.0148871	0.0117477	0.0132015		3.7675e-08	-0.393761	0.867526	0.523302	-1.40849
3.77e-08	0.11201	0.0154004	0.00991688	0.0109132		3.77e-08	0.718091	0.180176	1.76036	2.90587
3.7725e-08	0.114549	0.0154004	0.0120528	0.0110892		3.7725e-08	0.976616	1.20848	0.888453	-0.451227
3.775e-08	0.111446	0.0168121	0.0151042	0.0121453		3.775e-08	1.11327	0.216823	0.348618	-1.36873
3.7775e-08	0.130913	0.0179671	0.0129682	0.0109132		3.7775e-08	0.883012	1.14576	-0.637382	-1.3555
3.78e-08	0.119346	0.0170688	0.0117477	0.0110892		3.78e-08	-1.30716	0.354655	-0.622564	0.40725
3.7825e-08	0.116524	0.0170688	0.0114426	0.0109132		3.7825e-08	0.666385	-1.14751	0.618625	0.655383
3.785e-08	0.126681	0.0178388	0.0114426	0.0100331		3.785e-08	-0.66895	-0.318886	0.29972	0.903903
3.7875e-08	0.114549	0.0180955	0.0115951	0.0123214		3.7875e-08	0.694479	-1.51983	1.87881	0.802031
3.79e-08	0.124142	0.0174538	0.0126631	0.0121453		3.79e-08	2.3059	-0.690081	-1.45755	-1.99163
3.7925e-08	0.112292	0.0162988	0.0122054	0.0126734		3.7925e-08	1.58343	-0.367532	-0.21292	-1.27627
3.795e-08	0.115678	0.0169404	0.0163247	0.00792088		3.795e-08	-1.97105	0.872058	0.0261191	0.6125
3.7975e-08	0.121603	0.0142454	0.0132734	0.00862496		3.7975e-08	0.258003	0.279244	1.04997	0.861917
3.8e-08	0.110035	0.0159138	0.0126631	0.0130254		3.8e-08	-0.714605	0.399416	-0.167623	-1.35406
3.8025e-08	0.116524	0.0136037	0.0114426	0.00827292		3.8025e-08	1.14897	-1.31823	-2.17312	0.186731
3.805e-08	0.117935	0.0165554	0.0111374	0.0117933		3.805e-08	-0.442014	0.333637	-0.249844	-0.269381
3.8075e-08	0.117371	0.0182238	0.00961175	0.0117933		3.8075e-08	-0.18184	1.37469	-0.572231	-0.373149
3.81e-08	0.113985	0.0159138	0.0125105	0.0112653		3.81e-08	-0.663398	0.472202	0.905463	-0.359308
3.8125e-08	0.117088	0.013347	0.0106797	0.0102091		3.8125e-08	0.834892	-0.739402	-0.317641	-2.232
3.815e-08	0.118499	0.0148871	0.0126631	0.0114413		3.815e-08	0.97281	1.02144	-0.190052	1.79251
3.8175e-08	0.113703	0.0148871	0.0144939	0.0105612		3.8175e-08	-0.129022	-0.807924	1.06603	1.57192
3.82e-08	0.110599	0.0170688	0.0106797	0.0109132		3.82e-08	1.00108	-0.0716016	-0.16013	0.405318
3.8225e-08	0.118499	0.0161704	0.0126631	0.0100331		3.8225e-08	0.51841	-2.62535	0.759004	-0.171748
3.825e-08	0.125271	0.0157854	0.0108323	0.0103852		3.825e-08	1.02934	0.581353	0.209132	0.315799
3.8275e-08	0.116524	0.0174538	0.0108323	0.00985709		3.8275e-08	-1.19586	-1.46134	-2.03994	-2.27687
3.83e-08	0.117088	0.0166838	0.0105272	0.0102091		3.83e-08	-0.934585	-0.619982	-1.00686	-0.722954
3.8325e-08	0.113985	0.0171971	0.0146465	0.0144336		3.8325e-08	-0.174468	1.04869	-1.55976	0.596121
3.835e-08	0.117935	0.0175821	0.0131208	0.0119693		3.835e-08	-0.660259	-0.895959	0.496944	-0.102159
3.8375e-08	0.102981	0.0152721	0.0128157	0.0116173		3.8375e-08	-0.0235241	-1.29291	-1.19167	0.268426
3.84e-08	0.109471	0.0169404	0.0106797	0.0135535		3.84e-08	-0.38511	-0.448487	-0.154461	-0.0743489
3.8425e-08	0.107496	0.012962	0.0125105	0.0109132		3.8425e-08	-1.74748	-1.98544	-1.50516	0.535025
3.845e-08	0.106085	0.0154004	0.01129	0.0110892		3.845e-08	0.141133	1.14119	-0.58038	0.0726738
3.8475e-08	0.103546	0.0154004	0.0111374	0.0105612		3.8475e-08	1.28147	-0.0857986	-0.793922	1.51817
3.85e-08	0.103264	0.0143737	0.0119003	0.0109132		3.85e-08	-0.208307	-1.73061	1.2738	-1.80954
3.8525e-08	0.117935	0.0154004	0.0135785	0.0121453		3.8525e-08	-0.0699221	0.260856	-0.308767	-0.00480918
3.855e-08	0.107778	0.0147587	0.0115951	0.0116173		3.855e-08	-0.0568808	1.21513	0.391475	-0.110521
3.8575e-08	0.110599	0.0150154	0.0140362	0.0109132		3.8575e-08	0.835637	0.400218	-1.88085	-0.575501
3.86e-08	0.110881	0.0152721	0.0114426	0.0144336		3.86e-08	1.35236	0.10511	-0.608462	-0.442348
3.8625e-08	0.109189	0.0124487	0.0119003	0.0119693		3.8625e-08	-1.27626	-0.71234	0.436922	0.650087
3.865e-08	0.108624	0.0165554	0.0120528	0.008977		3.865e-08	0.750952	-0.80014	-1.26789	0.784439
3.8675e-08	0.104674	0.0169404	0.0128157	0.0112653		3.8675e-08	-0.621979	-0.156309	-1.25419	-0.281845
3.87e-08	0.118217	0.0139887	0.00976432	0.0114413		3.87e-08	1.15676	1.22113	-0.895902	1.41431
3.8725e-08	0.117935	0.0138604	0.0117477	0.00932904		3.8725e-08	-1.60702	-0.122042	-0.0772111	1.54957
3.875e-08	0.110599	0.0139887	0.0128157	0.00792088		3.875e-08	-0.458046	-9.82545e-05	0.742832	-0.241117
3.8775e-08	0.107496	0.013732	0.0103746	0.0107372		3.8775e-08	0.439841	-1.13706	-0.393349	0.736301
3.88e-08	0.102981	0.0132187	0.0108323	0.0110892		3.88e-08	-0.812562	-2.1711	-0.609503	-0.696354
3.8825e-08	0.102699	0.0147587	0.0114426	0.0103852		3.8825e-08	-0.546935	-0.158818	-0.0186367	0.282238
3.885e-08	0.108906	0.0146304	0.0108323	0.0105612		3.885e-08	0.099443	-0.247068	0.111426	2.22868
3.8875e-08	0.104674	0.0143737	0.0152567	0.00950506		3.8875e-08	-1.15639	-0.124907	-0.913721	-0.656963
3.89e-08	0.115113	0.0160421	0.01129	0.0117933		3.89e-08	-1.27142	-0.424129	0.950339	0.0820638
3.8925e-08	0.102981	0.0128337	0.0131208	0.00739282		3.8925e-08	-1.25955	1.2804	-2.15912	1.06446
3.895e-08	0.111446	0.0165554	0.0114426	0.00968108		3.895e-08	0.278668	0.453931	-0.292998	-1.587
3.8975e-08	0.102135	0.0142454	0.0106797	0.0121453		3.8975e-08	0.164484	0.260019	-2.01763	-0.36184
3.9e-08	0.107214	0.0142454	0.0125105	0.00968108		3.9e-08	1.57894	1.75811	0.315823	0.865319
3.9025e-08	0.11596	0.0132187	0.0131208	0.0132015		3.9025e-08	0.828021	-0.552477	-1.17903	-1.30706
3.905e-08	0.104674	0.0151437	0.0100695	0.0116173		3.905e-08	-3.36972	-0.00621345	1.159	-0.443473
3.9075e-08	0.108624	0.014117	0.0135785	0.0102091		3.9075e-08	1.74904	-0.413554	-0.1051	0.54319
3.91e-08	0.102135	0.0138604	0.0106797	0.0112653		3.91e-08	-0.409717	-0.397041	1.18992	1.28789
3.9125e-08	0.105239	0.0152721	0.0129682	0.0119693		3.9125e-08	1.00992	0.894472	-0.891969	-0.76955
3.915e-08	0.106649	0.0154004	0.0126631	0.00862496		3.915e-08	-1.66513	-0.364007	-0.528413	0.463194
3.9175e-08	0.116806	0.0130903	0.0117477	0.0124974		3.9175e-08	-0.628633	-0.453918	1.23633	-0.499583
3.92e-08	0.108342	0.013732	0.010222	0.0124974		3.92e-08	-0.231661	-0.757088	-1.66855	-0.364292
3.9225e-08	0.10806	0.0142454	0.0105272	0.00932904		3.9225e-08	0.936009	-1.16747	-1.88935	1.48322
3.925e-08	0.104392	0.0151437	0.010222	0.0102091		3.925e-08	-1.6195	-0.084446	-0.940451	0.396432
3.9275e-08	0.105803	0.0148871	0.0146465	0.0116173		3.9275e-08	3.01987	0.573173	-1.62953	0.655194
3.93e-08	0.10411	0.0162988	0.0108323	0.0102091		3.93e-08	-0.824776	-1.2272	-1.85096	-0.43414
3.9325e-08	0.106649	0.0156571	0.0119003	0.0109132		3.9325e-08	-0.297719	0.179575	-0.430514	-0.0530124
3.935e-08	0.101853	0.0127053	0.0109849	0.00968108		3.935e-08	-0.414176	-0.660464	-1.00359	-1.51315
3.9375e-08	0.102417	0.0139887	0.00976432	0.00950506		3.9375e-08	1.66173	1.28529	-0.637623	0.588163
3.94e-08	0.114831	0.0142454	0.00869634	0.008977		3.94e-08	-0.131392	0.766585	-0.741468	0.23305
3.9425e-08	0.115113	0.0148871	0.0119003	0.0102091		3.9425e-08	-1.5399	-0.719631	1.62622	0.000431717
3.945e-08	0.102981	0.0145021	0.0108323	0.0112653		3.945e-08	-0.106328	-1.77856	-1.53874	1.36896
3.9475e-08	0.106085	0.0154004	0.0114426	0.0107372		3.9475e-08	-0.611383	-0.257298	-1.28997	-1.69899
3.95e-08	0.100442	0.0130903	0.010222	0.0102091		3.95e-08	0.566235	-0.240941	-1.15881	2.01492
3.9525e-08	0.0998779	0.0147587	0.0106797	0.0126734		3.9525e-08	-0.0687645	-2.38021	1.68877	-1.05762
3.955e-08	0.0976207	0.011807	0.0105272	0.0103852		3.955e-08	0.851725	-0.531918	-1.95971	0.56162
3.9575e-08	0.11201	0.0138604	0.0115951	0.0121453		3.9575e-08	1.51405	-0.73185	0.300421	-0.661681
3.96e-08	0.111446	0.0134754	0.00991688	0.0124974		3.96e-08	-0.421059	-0.0676261	-0.0403599	-0.525164
3.9625e-08	0.0979029	0.0132187	0.0109849	0.0100331		3.9625e-08	-1.05903	0.273259	-0.855707	-0.14063
3.965e-08	0.106085	0.0155287	0.0103746	0.00985709		3.965e-08	-0.65698	-1.55048	-0.723697	0.616543
3.9675e-08	0.109753	0.012962	0.0108323	0.0135535		3.9675e-08	0.396922	0.523357	0.595438	1.37494
3.97e-08	0.104674	0.0152721	0.00930661	0.0112653		3.97e-08	0.409743	-0.978095	0.134892	-0.101238
3.9725e-08	0.10806	0.0109086	0.0120528	0.00827292		3.9725e-08	-0.621066	-0.962555	1.6947	-0.336733
3.975e-08	0.100442	0.0107803	0.0119003	0.0103852		3.975e-08	-0.217425	-0.838384	-1.02659	2.28891
3.9775e-08	0.0964922	0.013347	0.010222	0.0102091		3.9775e-08	0.84017	0.699619	0.296605	0.560713
3.98e-08	0.101289	0.0124487	0.0111374	0.0117933		3.98e-08	-1.23907	-0.371844	-0.523445	0.200461
3.9825e-08	0.106085	0.0134754	0.0117477	0.0139055		3.9825e-08	0.342863	-0.682699	0.802311	1.83513
3.985e-08	0.101006	0.0164271	0.00961175	0.0121453		3.985e-08	-0.0374191	-0.339944	1.6527	0.227042
3.9875e-08	0.105521	0.0150154	0.0120528	0.0105612		3.9875e-08	0.106026	-0.323997	0.473176	-0.759073
3.99e-08	0.101289	0.0109086	0.0103746	0.0103852		3.99e-08	0.774476	-1.18185	-0.708336	0.878768
3.9925e-08	0.115678	0.0115503	0.00976432	0.00844894		3.9925e-08	-0.525555	-1.05734	-1.65246	0.392061
3.995e-08	0.110317	0.0139887	0.0141888	0.0103852		3.995e-08	0.669078	1.69344	0.156949	1.53257
3.9975e-08	0.108906	0.0139887	0.0120528	0.0103852		3.9975e-08	1.6026	0.835019	1.72958	-0.458471
4e-08	0.100724	0.0148871	0.0119003	0.0103852		4e-08	-0.489744	-0.901884	-1.25476	-1.82561
4.0025e-08	0.0990314	0.0119353	0.0125105	0.00968108		4.0025e-08	0.444287	-0.118561	0.0790703	1.1989
4.005e-08	0.0998779	0.012577	0.010222	0.00968108		4.005e-08	-0.465918	0.226868	-0.748311	-0.797402
4.0075e-08	0.108342	0.0146304	0.0115951	0.0117933		4.0075e-08	-0.585961	-2.28466	-0.735079	0.975374
4.01e-08	0.102981	0.0162988	0.0120528	0.0121453		4.01e-08	-0.706222	-0.18058	-1.44419	0.989145
4.0125e-08	0.0976207	0.0147587	0.01129	0.00932904		4.0125e-08	1.28783	-1.37578	1.46019	-1.2642
4.015e-08	0.110035	0.0147587	0.0109849	0.00862496		4.015e-08	-0.286055	-1.25076	-0.333618	1.0167
4.0175e-08	0.0959279	0.0127053	0.0108323	0.008977		4.0175e-08	-0.00929672	-1.12553	0.404067	0.904327
4.02e-08	0.103828	0.0128337	0.0120528	0.0112653		4.02e-08	-1.45433	2.42202	1.26375	1.80183
4.0225e-08	0.104956	0.013347	0.0132734	0.0102091		4.0225e-08	1.73879	-1.09547	-1.38102	-0.33193
4.025e-08	0.102417	0.0120637	0.00900148	0.00844894		4.025e-08	0.823551	0.467751	-0.642435	0.313046
4.0275e-08	0.100724	0.0130903	0.0106797	0.00756884		4.0275e-08	-1.15561	1.2589	-0.62922	0.579332
4.03e-08	0.102981	0.0134754	0.0109849	0.00932904		4.03e-08	-0.479835	1.60827	1.32308	1.22604
4.0325e-08	0.101289	0.0128337	0.0105272	0.00950506		4.0325e-08	0.197007	0.516776	-1.08801	2.25409
4.035e-08	0.108624	0.012192	0.0114426	0.00985709		4.035e-08	0.608673	-0.57667	0.867106	0.619338
4.0375e-08	0.105521	0.0132187	0.0114426	0.00739282		4.0375e-08	-0.977474	-0.783473	-1.79141	0.124743
4.04e-08	0.0995957	0.013732	0.0117477	0.00915302		4.04e-08	0.900598	-1.43535	0.531119	-0.116503
4.0425e-08	0.102417	0.013732	0.0108323	0.0103852		4.0425e-08	-0.287569	-1.42077	1.64051	0.913733
4.045e-08	0.104956	0.0151437	0.00930661	0.00880098		4.045e-08	-1.07701	-0.515249	1.16834	-0.218344
4.0475e-08	0.0995957	0.012192	0.00976432	0.00844894		4.0475e-08	-0.531132	-1.72602	0.451554	0.431259
4.05e-08	0.0919779	0.0128337	0.0108323	0.008977		4.05e-08	0.283142	0.0732789	-0.510462	0.57189
4.0525e-08	0.109753	0.013732	0.00976432	0.00968108		4.0525e-08	0.697068	0.647408	2.06688	-0.690928
4.055e-08	0.0885922	0.012962	0.00884891	0.00968108		4.055e-08	0.843658	-0.230388	-0.850737	0.215198
4.0575e-08	0.100442	0.013732	0.00900148	0.0114413		4.0575e-08	1.92911	-0.662332	-1.69403	0.3559
4.06e-08	0.0998779	0.0116786	0.0114426	0.00827292		4.06e-08	1.13747	-0.64724	-0.335414	-0.142769
4.0625e-08	0.11201	0.012962	0.010222	0.0105612		4.0625e-08	1.41901	1.16073	-0.689687	1.02198
4.065e-08	0.0976207	0.0130903	0.00930661	0.00862496		4.065e-08	-2.06272	1.96247	-0.431515	0.907376
4.0675e-08	0.101853	0.0115503	0.00991688	0.00915302		4.0675e-08	0.638146	-0.938697	0.808763	1.43371
4.07e-08	0.0956457	0.0134754	0.00900148	0.00968108		4.07e-08	-0.964973	1.66017	-0.650815	0.035903
4.0725e-08	0.09621	0.0130903	0.0119003	0.00985709		4.0725e-08	-1.22326	1.00256	-0.0232802	-0.208275
4.075e-08	0.101289	0.013732	0.00991688	0.00844894		4.075e-08	0.675648	-1.34446	-0.255856	-0.0672589
4.0775e-08	0.0950815	0.0115503	0.00961175	0.00968108		4.0775e-08	0.418209	-1.66802	2.21976	-0.697913
4.08e-08	0.0922601	0.0115503	0.0115951	0.0063367		4.08e-08	2.32144	-0.751993	-0.968714	0.215363
4.0825e-08	0.101853	0.012962	0.00839121	0.008977		4.0825e-08	0.713069	-0.0600891	0.277118	-0.416146
4.085e-08	0.0925422	0.0134754	0.0103746	0.0103852		4.085e-08	0.184384	-1.17408	-0.696656	0.498789
4.0875e-08	0.101006	0.0124487	0.01129	0.00880098		4.0875e-08	-0.209773	-0.82051	-0.436795	0.124567
4.09e-08	0.109471	0.012192	0.012358	0.00950506		4.09e-08	-0.469074	-0.918903	-0.0528934	-1.41278
4.0925e-08	0.0897208	0.0127053	0.00991688	0.008977		4.0925e-08	0.356104	0.56785	1.07401	-0.108656
4.095e-08	0.0956457	0.0138604	0.0105272	0.00915302		4.095e-08	-0.988972	-0.549577	-1.7599	0.93881
4.0975e-08	0.109471	0.0116786	0.00976432	0.00932904		4.0975e-08	-1.52124	-0.874935	0.978583	-0.472189
4.1e-08	0.0939529	0.0151437	0.00900148	0.00704078		4.1e-08	-0.0152715	-0.0655427	-1.11592	0.317457
4.1025e-08	0.102417	0.011807	0.00930661	0.0102091		4.1025e-08	-0.139517	-2.09565	0.510288	0.200514
4.105e-08	0.0916958	0.0124487	0.0100695	0.00862496		4.105e-08	-0.127832	-0.603599	-0.345708	0.472737
4.1075e-08	0.0894386	0.012192	0.00930661	0.0080969		4.1075e-08	-0.116154	-1.27181	0.164649	-1.33304
4.11e-08	0.106367	0.0119353	0.0103746	0.0112653		4.11e-08	0.304657	-1.59942	0.551376	-1.06167
4.1125e-08	0.0931065	0.0120637	0.0115951	0.00844894		4.1125e-08	-1.1847	-2.26971	-1.55228	-0.529654
4.115e-08	0.0956457	0.0147587	0.010222	0.0121453		4.115e-08	-1.0373	0.596859	-0.0444961	-1.16874
4.1175e-08	0.0990314	0.0124487	0.0074758	0.00985709		4.1175e-08	-0.20614	0.498421	-1.02935	2.23109
4.12e-08	0.098185	0.0102669	0.00854378	0.00827292		4.12e-08	0.215891	-1.0865	-0.392685	1.72361
4.1225e-08	0.101289	0.0127053	0.00884891	0.00932904		4.1225e-08	-0.0460546	0.300957	-0.504762	0.562609
4.125e-08	0.0922601	0.014117	0.00717067	0.0117933		4.125e-08	1.47303	0.889087	-0.116796	-1.6454
4.1275e-08	0.104674	0.0124487	0.0115951	0.0080969		4.1275e-08	-0.296998	-0.0119826	0.647276	0.326785
4.13e-08	0.0857708	0.0116786	0.00839121	0.0112653		4.13e-08	-1.24635	-0.685208	0.786218	0.0776902
4.1325e-08	0.0990314	0.0112936	0.00945918	0.00844894		4.1325e-08	0.687438	-0.326186	-0.579125	0.613892
4.135e-08	0.0939529	0.0119353	0.00839121	0.00880098		4.135e-08	1.52449	0.148357	0.562794	-0.946025
4.1375e-08	0.0914136	0.0112936	0.00762837	0.0100331		4.1375e-08	-0.113679	0.278615	-0.302704	-0.409824
4.14e-08	0.0928243	0.0159138	0.00991688	0.0103852		4.14e-08	-0.928312	-0.281687	-1.92374	-0.00404447
4.1425e-08	0.0979029	0.0146304	0.00930661	0.00844894		4.1425e-08	-0.917423	1.46157	-0.654374	-1.43691
4.145e-08	0.0936708	0.0101386	0.0114426	0.00950506		4.145e-08	0.748475	-0.136664	1.24652	0.414986
4.1475e-08	0.0959279	0.0119353	0.00976432	0.0080969		4.1475e-08	1.17477	-1.85314	0.25266	-0.493534
4.15e-08	0.0911315	0.0130903	0.00930661	0.00985709		4.15e-08	1.46359	1.0485	0.139817	0.966976
4.1525e-08	0.0900029	0.0119353	0.0114426	0.00774486		4.1525e-08	-0.0443983	-1.0169	-0.982852	-1.39245
4.155e-08	0.0970564	0.013732	0.00839121	0.00774486		4.155e-08	0.382203	0.154485	-0.212835	-0.194185
4.1575e-08	0.0905672	0.0106519	0.010222	0.00844894		4.1575e-08	0.947931	-2.03118	-0.958477	0.477924
4.16e-08	0.0914136	0.0115503	0.0103746	0.008977		4.16e-08	-0.425585	0.300579	-0.566763	1.54745
4.1625e-08	0.0883101	0.0112936	0.00930661	0.00492855		4.1625e-08	0.833819	-0.0323271	-0.427656	-0.819209
4.165e-08	0.0905672	0.0107803	0.00884891	0.0103852		4.165e-08	-0.12561	-1.17874	-1.04865	-0.0137011
4.1675e-08	0.0863351	0.012192	0.0122054	0.00985709		4.1675e-08	1.9695	0.578607	0.104842	-1.32594
4.17e-08	0.0900029	0.013732	0.00915405	0.0102091		4.17e-08	-2.32716	1.17567	1.76792	-0.121937
4.1725e-08	0.0863351	0.011422	0.00839121	0.00950506		4.1725e-08	0.74345	-0.0891809	-0.504265	-1.17111
4.175e-08	0.0905672	0.0120637	0.00976432	0.00756884		4.175e-08	1.45176	0.624798	1.5424	0.433189
4.1775e-08	0.0922601	0.011807	0.0108323	0.00686476		4.1775e-08	1.60373	-0.059633	-0.224812	0.57851
4.18e-08	0.0891565	0.012962	0.00823864	0.00968108		4.18e-08	-2.5676	0.188583	0.551927	0.325113
4.1825e-08	0.0908494	0.013732	0.0111374	0.00686476		4.1825e-08	0.931272	0.554024	-0.836708	0.470523
4.185e-08	0.104392	0.0115503	0.0111374	0.00915302		4.185e-08	2.61972	-1.06784	-0.441908	-0.0497909
4.1875e-08	0.0947993	0.011037	0.0115951	0.0109132		4.1875e-08	-0.0230278	0.233384	-0.940077	0.228805
4.19e-08	0.0970564	0.0115503	0.0108323	0.00862496		4.19e-08	1.52741	1.06829	-1.43908	0.374432
4.1925e-08	0.094235	0.0128337	0.00732324	0.00932904		4.1925e-08	1.11995	-0.557398	-1.55531	-1.08181
4.195e-08	0.0953636	0.0119353	0.00991688	0.00651272		4.195e-08	1.13224	-0.425815	-1.15987	0.532731
4.1975e-08	0.0863351	0.00911191	0.00854378	0.00651272		4.1975e-08	1.00427	-0.0591497	-1.40418	-1.32694
4.2e-08	0.0877458	0.0102669	0.00991688	0.00563263		4.2e-08	0.595358	1.48353	0.145596	0.0223009
4.2025e-08	0.0874637	0.011037	0.00823864	0.00915302		4.2025e-08	-0.516603	-0.735763	0.0301767	0.0343007
4.205e-08	0.0900029	0.0106519	0.0106797	0.0103852		4.205e-08	-1.48978	-0.368538	0.556482	-0.0877551
4.2075e-08	0.0936708	0.0132187	0.00884891	0.00844894		4.2075e-08	-0.35408	-0.000716698	0.312653	0.460727
4.21e-08	0.0849244	0.011037	0.00945918	0.00932904		4.21e-08	-1.18791	-0.339978	0.0684015	1.01007
4.2125e-08	0.094235	0.0116786	0.00762837	0.0107372		4.2125e-08	0.23164	-0.443748	-0.819786	-0.0521363
4.215e-08	0.0925422	0.0106519	0.00854378	0.00950506		4.215e-08	-0.321017	-1.13847	-0.55016	-0.98158
4.2175e-08	0.0939529	0.00962525	0.0111374	0.00862496		4.2175e-08	-1.01571	-1.36139	-0.280108	0.24079
4.22e-08	0.0888744	0.0106519	0.00762837	0.00880098		4.22e-08	0.689844	1.25577	0.119387	0.387582
4.2225e-08	0.0829494	0.0116786	0.0109849	0.00792088		4.2225e-08	0.136183	-0.386991	0.132138	-0.2742
4.225e-08	0.0877458	0.00924024	0.00900148	0.00844894		4.225e-08	-1.69172	0.575648	-0.501269	-0.397446
4.2275e-08	0.0916958	0.0120637	0.0103746	0.0112653		4.2275e-08	-1.39865	-0.00267289	1.06296	-1.06097
4.23e-08	0.0815387	0.011422	0.00961175	0.0102091		4.23e-08	-1.10513	0.36806	0.170328	0.301236
4.2325e-08	0.0891565	0.012192	0.00945918	0.00932904		4.2325e-08	-0.243891	0.739392	-0.205601	2.34175
4.235e-08	0.0947993	0.0100103	0.00991688	0.00827292		4.235e-08	-0.516761	-0.554176	1.36261	-0.892682
4.2375e-08	0.0868994	0.0107803	0.0105272	0.00968108		4.2375e-08	0.204232	-0.421185	-0.180819	-1.15249
4.24e-08	0.0914136	0.0119353	0.0114426	0.0063367		4.24e-08	0.0734128	1.02287	-0.687873	0.213935
4.2425e-08	0.0900029	0.0101386	0.0106797	0.00968108		4.2425e-08	2.07643	1.99231	0.363853	-0.452413
4.245e-08	0.084078	0.00936858	0.00884891	0.0072168		4.245e-08	0.950177	0.934037	0.116534	0.916726
4.2475e-08	0.0900029	0.0128337	0.00854378	0.00985709		4.2475e-08	0.819591	1.54658	-1.69337	1.33688
4.25e-08	0.0947993	0.0101386	0.00823864	0.0080969		4.25e-08	0.118333	0.127312	-1.29139	-1.09809
4.2525e-08	0.082103	0.0111653	0.00732324	0.00827292		4.2525e-08	-0.298621	1.21886	1.19749	0.137645
4.255e-08	0.0914136	0.0106519	0.0100695	0.00880098		4.255e-08	0.997768	-0.682343	-0.0940636	0.421884
4.2575e-08	0.0939529	0.00975359	0.0114426	0.00756884		4.2575e-08	0.866696	-1.74763	-1.12653	1.25181
4.26e-08	0.0885922	0.0101386	0.00839121	0.00774486		4.26e-08	0.30621	-1.6149	-1.50715	-0.372579
4.2625e-08	0.0933886	0.0112936	0.00854378	0.00880098		4.2625e-08	1.0334	-0.281054	-0.318614	1.55025
4.265e-08	0.0846423	0.00988193	0.00976432	0.00915302		4.265e-08	-0.530897	-1.3488	0.871841	-0.896366
4.2675e-08	0.0922601	0.0107803	0.0103746	0.00827292		4.2675e-08	0.0533534	1.31076	-0.0322446	0.892338
4.27e-08	0.0885922	0.00988193	0.00976432	0.00668874		4.27e-08	-0.0790654	1.3261	-2.11803	1.45215
4.2725e-08	0.0936708	0.0112936	0.00915405	0.00844894		4.2725e-08	-0.211713	-0.46609	0.254987	-0.726518
4.275e-08	0.078153	0.0111653	0.010222	0.00704078		4.275e-08	-0.632084	-1.29654	-1.96536	-0.441304
4.2775e-08	0.0900029	0.00924024	0.00900148	0.00651272		4.2775e-08	-0.0461437	0.647808	1.20031	1.90213
4.28e-08	0.0871815	0.0100103	0.00930661	0.008977		4.28e-08	0.108783	-0.908053	0.424245	0.954176
4.2825e-08	0.0778709	0.0128337	0.0109849	0.0080969		4.2825e-08	0.119846	-0.290169	0.305228	0.0046853
4.285e-08	0.0778709	0.0101386	0.00854378	0.00756884		4.285e-08	0.419305	0.32874	-1.13175	0.566317
4.2875e-08	0.094235	0.00975359	0.00793351	0.008977		4.2875e-08	-0.146657	1.19092	0.594078	1.67932
4.29e-08	0.0933886	0.00924024	0.00961175	0.00932904		4.29e-08	0.586318	0.963548	-1.37298	-2.02657
4.2925e-08	0.0888744	0.0103953	0.00762837	0.0072168		4.2925e-08	1.46498	-0.356155	-0.17296	-0.776049
4.295e-08	0.0849244	0.0100103	0.00839121	0.0072168		4.295e-08	0.175184	-0.706697	1.69	-0.213307
4.2975e-08	0.0815387	0.00924024	0.00869634	0.00844894		4.2975e-08	0.475798	-2.15165	1.1744	-0.89225
4.3e-08	0.0823851	0.00898357	0.00900148	0.00880098		4.3e-08	-0.961754	0.779782	-0.931079	0.500283
4.3025e-08	0.0806923	0.00911191	0.0074758	0.00792088		4.3025e-08	-0.661614	0.672686	0.803198	-0.870637
4.305e-08	0.0894386	0.0112936	0.00778094	0.00932904		4.305e-08	-0.651254	-0.165688	0.152889	0.524071
4.3075e-08	0.082103	0.0128337	0.00839121	0.00668874		4.3075e-08	-0.350443	0.0919931	0.297931	-0.987564
4.31e-08	0.084078	0.00975359	0.00808607	0.00915302		4.31e-08	0.822881	-1.23656	2.43587	0.963668
4.3125e-08	0.0804101	0.00911191	0.00930661	0.00651272		4.3125e-08	-0.474736	-0.490788	-1.13973	1.25332
4.315e-08	0.080128	0.012577	0.00839121	0.00827292		4.315e-08	-0.609837	1.11203	-0.330137	0.710435
4.3175e-08	0.0778709	0.011807	0.00900148	0.0080969		4.3175e-08	-0.162414	-0.2191	0.880257	-0.389097
4.32e-08	0.0964922	0.012962	0.00854378	0.00880098		4.32e-08	-1.90133	-0.69526	0.36001	-1.07323
4.3225e-08	0.086053	0.012192	0.0109849	0.0103852		4.3225e-08	0.734507	-0.559411	-0.0277165	0.468126
4.325e-08	0.078153	0.0100103	0.00839121	0.00686476		4.325e-08	-0.130297	0.435345	-0.282607	-0.495009
4.3275e-08	0.0931065	0.00847022	0.00976432	0.00915302		4.3275e-08	-2.16567	-1.14657	-0.00354537	0.770438
4.33e-08	0.0894386	0.00885523	0.00808607	0.00651272		4.33e-08	0.0373381	0.955229	-0.927425	-1.31
4.3325e-08	0.0744852	0.011037	0.00671297	0.00950506		4.3325e-08	-1.26927	1.21578	2.16162	-1.16008
4.335e-08	0.0891565	0.0107803	0.00579756	0.00915302		4.335e-08	0.644889	1.35365	0.56833	0.107778
4.3375e-08	0.0883101	0.011037	0.00762837	0.0072168		4.3375e-08	1.6824	-0.356168	-0.0893302	0.259022
4.34e-08	0.0744852	0.0107803	0.0100695	0.00862496		4.34e-08	1.54774	-0.0961382	0.861595	-0.569065
4.3425e-08	0.0849244	0.00949692	0.010222	0.0102091		4.3425e-08	-1.08342	-1.43991	-1.67637	1.54252
4.345e-08	0.0835137	0.0101386	0.00686554	0.00844894		4.345e-08	-1.07354	-2.16844	-0.859577	0.573953
4.3475e-08	0.0812566	0.0103953	0.00869634	0.00862496		4.3475e-08	0.995331	1.42815	-0.982728	0.445446
4.35e-08	0.084078	0.0119353	0.00945918	0.008977		4.35e-08	-0.906609	0.453325	-0.164101	2.14166
4.3525e-08	0.0832315	0.0111653	0.00884891	0.00739282		4.3525e-08	-1.04394	0.962649	-2.44183	-1.49816
4.355e-08	0.0863351	0.0106519	0.00671297	0.00915302		4.355e-08	1.76686	0.109622	1.47702	-1.7693
4.3575e-08	0.0764602	0.00962525	0.00961175	0.0102091		4.3575e-08	0.303563	-0.868909	0.950549	2.32125
4.36e-08	0.080128	0.0109086	0.00808607	0.00651272		4.36e-08	-0.571455	-0.359511	-1.06185	0.081102
4.3625e-08	0.0815387	0.0115503	0.00884891	0.00880098		4.3625e-08	0.0297993	1.89007	-0.780569	-0.894172
4.365e-08	0.0843601	0.0105236	0.00808607	0.0080969		4.365e-08	0.188339	-0.208598	-1.85107	-0.883664
4.3675e-08	0.0806923	0.0115503	0.00869634	0.0112653		4.3675e-08	-2.76085	0.551492	-2.38199	-0.167354
4.37e-08	0.0837958	0.0105236	0.00778094	0.00704078		4.37e-08	-0.530675	-1.67644	1.6912	0.691347
4.3725e-08	0.0894386	0.00936858	0.00793351	0.00880098		4.3725e-08	0.961838	-0.79169	0.34895	-0.710743
4.375e-08	0.0792816	0.0105236	0.0074758	0.00844894		4.375e-08	-0.21359	1.71645	-1.53813	1.13931
4.3775e-08	0.0849244	0.0115503	0.00823864	0.00774486		4.3775e-08	-0.648569	-1.01572	-0.712912	-0.123094
4.38e-08	0.0849244	0.0101386	0.00778094	0.0100331		4.38e-08	1.5902	-0.753146	-1.78867	0.454823
4.3825e-08	0.0736388	0.0103953	0.00778094	0.0080969		4.3825e-08	-1.37195	-0.990482	0.261481	0.466306
4.385e-08	0.0877458	0.0101386	0.00900148	0.00827292		4.385e-08	-0.0231572	-0.101584	-1.08746	0.61973
4.3875e-08	0.0964922	0.0100103	0.00762837	0.0100331		4.3875e-08	1.77453	-0.213529	-0.123121	-1.49948
4.39e-08	0.0770244	0.0105236	0.00762837	0.00528059		4.39e-08	0.743117	0.802878	-1.06563	0.50076
4.3925e-08	0.0837958	0.00757187	0.00854378	0.00704078		4.3925e-08	0.455898	-1.69304	-0.236173	-1.47964
4.395e-08	0.0722281	0.0102669	0.00915405	0.0063367		4.395e-08	-0.578195	-0.801809	-1.58991	-0.615371
4.3975e-08	0.0758959	0.011037	0.00930661	0.00968108		4.3975e-08	-0.866935	0.216613	0.333557	0.535248
4.4e-08	0.0744852	0.0119353	0.00869634	0.00827292		4.4e-08	1.23611	-0.398917	0.345567	0.404122
4.4025e-08	0.0806923	0.0109086	0.00778094	0.00915302		4.4025e-08	0.0504891	-0.889597	-0.737324	-0.0126944
4.405e-08	0.0837958	0.00911191	0.00808607	0.00651272		4.405e-08	-0.38826	-0.877019	-2.09592	0.712525
4.4075e-08	0.080128	0.013347	0.00823864	0.00598466		4.4075e-08	0.0714867	-0.359912	1.88942	-0.991329
4.41e-08	0.0787173	0.00821355	0.00991688	0.00704078		4.41e-08	1.58183	-0.0944448	-1.25277	0.0203487
4.4125e-08	0.0758959	0.00859856	0.00976432	0.00528059		4.4125e-08	-0.658035	-0.460286	-0.281006	-1.11406
4.415e-08	0.0789994	0.0106519	0.00991688	0.00704078		4.415e-08	-0.197464	-0.573853	-0.819211	1.76186
4.4175e-08	0.0753316	0.00885523	0.00671297	0.0080969		4.4175e-08	0.414156	-0.181391	-0.67069	-0.520212
4.42e-08	0.0891565	0.00859856	0.0100695	0.0072168		4.42e-08	0.424899	-0.168282	-0.109055	-1.37074
4.4225e-08	0.0823851	0.0115503	0.00839121	0.00774486		4.4225e-08	-1.07009	2.12671	0.177979	-1.21721
4.425e-08	0.0832315	0.00936858	0.00808607	0.00739282		4.425e-08	-0.00569617	-1.03022	-0.499511	0.661434
4.4275e-08	0.0787173	0.0087269	0.00778094	0.0063367		4.4275e-08	-0.598559	0.378935	-0.0744243	0.529037
4.43e-08	0.084078	0.00988193	0.00595013	0.00792088		4.43e-08	0.316894	0.0111545	-1.9959	-0.467405
4.4325e-08	0.0888744	0.0112936	0.00900148	0.00792088		4.4325e-08	-1.63609	0.151512	0.915887	-1.03319
4.435e-08	0.0846423	0.0106519	0.00869634	0.00616068		4.435e-08	-0.87122	0.419381	-1.4228	-1.1673
4.4375e-08	0.0789994	0.011037	0.00839121	0.00598466		4.4375e-08	2.31532	-0.204186	-0.997177	0.574359
4.44e-08	0.0725102	0.0100103	0.00961175	0.00862496		4.44e-08	1.57046	-0.318751	-1.81751	0.00800976
4.4425e-08	0.0804101	0.0103953	0.00549243	0.00985709		4.4425e-08	-0.993778	0.332212	-2.36192	-0.992846
4.445e-08	0.0747673	0.0087269	0.00793351	0.00792088		4.445e-08	0.683755	0.0901425	0.00621269	-0.114863
4.4475e-08	0.0756137	0.0112936	0.0074758	0.00792088		4.4475e-08	0.998106	-0.791537	0.29543	-0.97266
4.45e-08	0.076178	0.0103953	0.00823864	0.00774486		4.45e-08	0.097943	1.01208	0.585084	-1.25233
4.4525e-08	0.0705352	0.0101386	0.005645	0.008977		4.4525e-08	-0.195687	-0.510624	-0.0983026	1.07735
4.455e-08	0.080128	0.0105236	0.00884891	0.00739282		4.455e-08	-0.0334694	-0.241712	-0.504452	-0.071818
4.4575e-08	0.0863351	0.00847022	0.00839121	0.00686476		4.4575e-08	0.585665	-1.12675	-0.0755381	0.0841397
4.46e-08	0.0787173	0.00795688	0.00839121	0.0080969		4.46e-08	-0.0130311	0.0406296	1.32984	-0.922321
4.4625e-08	0.0854887	0.0109086	0.00732324	0.0063367		4.4625e-08	1.82678	-0.331789	0.644773	-0.330486
4.465e-08	0.0806923	0.00911191	0.0074758	0.008977		4.465e-08	-2.12877	-1.34777	-0.46027	0.553381
4.4675e-08	0.076178	0.00962525	0.00793351	0.00686476		4.4675e-08	0.0176412	0.0796876	1.36733	-1.6205
4.47e-08	0.0784352	0.0087269	0.00808607	0.00827292		4.47e-08	-0.430596	0.607914	0.121223	-0.00734957
4.4725e-08	0.0739209	0.00949692	0.005645	0.00616068		4.4725e-08	-0.114839	0.234652	1.95217	-0.434302
4.475e-08	0.0770244	0.011037	0.00839121	0.00827292		4.475e-08	1.732	0.892847	-1.25647	-1.15398
4.4775e-08	0.0789994	0.00924024	0.00625527	0.00862496		4.4775e-08	-0.24782	1.03562	-0.124661	-0.267379
4.48e-08	0.0775887	0.00924024	0.00625527	0.00932904		4.48e-08	-1.00435	1.30781	-1.09545	-0.988104
4.4825e-08	0.0775887	0.00808521	0.0070181	0.00668874		4.4825e-08	-0.381309	-1.52364	-0.242574	1.36355
4.485e-08	0.076178	0.00988193	0.00579756	0.00686476		4.485e-08	0.396225	1.07681	-0.0909311	0.349987
4.4875e-08	0.0854887	0.00808521	0.00945918	0.0080969		4.4875e-08	2.55788	0.701887	1.04532	0.360935
4.49e-08	0.080128	0.0100103	0.0070181	0.0080969		4.49e-08	0.109553	0.326322	-0.068445	1.3988
4.4925e-08	0.0747673	0.00962525	0.010222	0.00704078		4.4925e-08	-1.11142	-1.73685	-0.902298	-1.96623
4.495e-08	0.0758959	0.00847022	0.00839121	0.00792088		4.495e-08	0.283992	-1.98523	2.35043	-0.0469901
4.4975e-08	0.0756137	0.00949692	0.0061027	0.0072168		4.4975e-08	1.21915	0.885549	0.247462	-0.771611
4.5e-08	0.0753316	0.0115503	0.00884891	0.00915302		4.5e-08	2.46425	-0.792113	-1.01175	1.15153
4.5025e-08	0.0727923	0.00859856	0.00945918	0.00704078		4.5025e-08	0.160587	-0.129017	0.835587	-1.19339
4.505e-08	0.0753316	0.00911191	0.00991688	0.0072168		4.505e-08	-0.447214	-0.246696	1.27172	-0.151974
4.5075e-08	0.0806923	0.00718686	0.0061027	0.00668874		4.5075e-08	0.335574	0.157059	-1.26348	0.00600118
4.51e-08	0.0744852	0.0109086	0.00839121	0.00739282		4.51e-08	0.345874	-0.091157	1.57944	-0.13104
4.5125e-08	0.0739209	0.00898357	0.00854378	0.00774486		4.5125e-08	0.820749	0.0520895	-1.66832	0.470377
4.515e-08	0.074203	0.00924024	0.0061027	0.0072168		4.515e-08	-1.18329	-0.196661	0.185743	-2.3279
4.5175e-08	0.0773066	0.0103953	0.0070181	0.00844894		4.5175e-08	1.15229	2.43281	-0.370812	-1.28337
4.52e-08	0.0595317	0.00898357	0.00823864	0.00774486		4.52e-08	0.38711	-1.08831	-0.928266	0.355105
4.5225e-08	0.0787173	0.00885523	0.00579756	0.00739282		4.5225e-08	-0.845293	-0.421229	0.504163	0.810528
4.525e-08	0.076178	0.00859856	0.00793351	0.00792088		4.525e-08	-0.52503	-0.277763	-1.33433	0.0801161
4.5275e-08	0.0744852	0.00975359	0.00793351	0.00774486		4.5275e-08	-0.204294	-0.265376	-1.0394	-1.54205
4.53e-08	0.0744852	0.0119353	0.00732324	0.00651272		4.53e-08	-0.661591	-1.30413	1.10896	0.10126
4.5325e-08	0.0654567	0.00821355	0.00579756	0.00774486		4.5325e-08	-0.807973	0.942856	-0.590865	1.74711
4.535e-08	0.0804101	0.00782854	0.00778094	0.00739282		4.535e-08	1.07266	-0.75471	-0.294712	1.16383
4.5375e-08	0.078153	0.00949692	0.00778094	0.00704078		4.5375e-08	-1.56966	-0.0842002	-0.426735	0.579625
4.54e-08	0.0733566	0.00821355	0.0065604	0.00668874		4.54e-08	1.71894	1.37836	-0.84496	-1.34659
4.5425e-08	0.0733566	0.0087269	0.00671297	0.00668874		4.5425e-08	0.479758	-1.77439	-2.40868	-1.18806
4.545e-08	0.0775887	0.0106519	0.00640783	0.00563263		4.545e-08	2.21076	0.349373	-0.108057	-0.730802
4.5475e-08	0.0804101	0.00782854	0.0061027	0.00827292		4.5475e-08	1.75274	-1.0915	-0.813729	-1.76644
4.55e-08	0.0744852	0.00885523	0.00823864	0.00686476		4.55e-08	1.764	-0.418588	0.200777	-0.113159
4.5525e-08	0.0730745	0.00949692	0.00762837	0.00756884		4.5525e-08	-0.576614	-0.671199	0.0684066	1.39308
4.555e-08	0.0792816	0.00962525	0.0074758	0.00510457		4.555e-08	0.217374	-0.394338	1.22883	0.805727
4.5575e-08	0.0792816	0.00885523	0.00854378	0.0063367		4.5575e-08	-0.243702	1.20885	-0.48461	0.217436
4.56e-08	0.0710995	0.00859856	0.00854378	0.00545661		4.56e-08	0.866047	-2.22791	-1.48129	-0.221847
4.5625e-08	0.080128	0.00847022	0.00686554	0.00616068		4.5625e-08	0.090173	0.970064	-0.463409	0.988804
4.565e-08	0.076178	0.00936858	0.00778094	0.00827292		4.565e-08	1.04448	0.451599	-0.0204293	-0.201459
4.5675e-08	0.0804101	0.00975359	0.00579756	0.00580865		4.5675e-08	0.740078	0.0652918	-1.30763	-0.49184
4.57e-08	0.0815387	0.00859856	0.00884891	0.00563263		4.57e-08	-1.7718	-0.0553954	-1.44205	1.47343
4.5725e-08	0.0764602	0.00988193	0.00793351	0.00774486		4.5725e-08	-1.29006	-1.24228	-0.854372	-0.923478
4.575e-08	0.0753316	0.00898357	0.0061027	0.00668874		4.575e-08	-0.17604	-1.36429	1.90293	-0.0100172
4.5775e-08	0.082103	0.00795688	0.00808607	0.00686476		4.5775e-08	-0.798421	0.648916	-1.70203	-1.05503
4.58e-08	0.076178	0.00936858	0.0065604	0.008977		4.58e-08	-0.314868	-0.941146	-2.41652	1.06671
4.5825e-08	0.0815387	0.0106519	0.00900148	0.00827292		4.5825e-08	-0.621854	-1.19699	-0.523537	-0.583105
4.585e-08	0.0758959	0.00924024	0.00808607	0.00510457		4.585e-08	0.337674	-1.31949	-0.658115	0.182263
4.5875e-08	0.0691245	0.00962525	0.00778094	0.0080969		4.5875e-08	0.347683	-0.772678	-0.647767	-0.412241
4.59e-08	0.0747673	0.00808521	0.00945918	0.00616068		4.59e-08	-0.594026	0.177065	-0.637417	2.01921
4.5925e-08	0.0691245	0.00757187	0.00579756	0.00598466		4.5925e-08	2.43137	1.66486	-1.35397	0.819341
4.595e-08	0.0688424	0.0077002	0.00640783	0.00668874		4.595e-08	-0.0988609	-0.335052	-0.471207	-0.53399
4.5975e-08	0.0688424	0.00898357	0.00686554	0.00756884		4.5975e-08	-0.725163	-0.457427	0.121708	0.689418
4.6e-08	0.0733566	0.00821355	0.0065604	0.00651272		4.6e-08	0.875105	-2.59688	-0.304546	-0.362526
4.6025e-08	0.0705352	0.0100103	0.0074758	0.00792088		4.6025e-08	-1.98074	-1.37571	-2.04406	-2.17579
4.605e-08	0.0730745	0.00898357	0.00839121	0.00792088		4.605e-08	1.85199	-1.49933	-0.283418	-0.494727
4.6075e-08	0.0688424	0.00847022	0.0065604	0.00739282		4.6075e-08	2.50101	0.263844	0.895696	0.732417
4.61e-08	0.0789994	0.00847022	0.00793351	0.00545661		4.61e-08	1.39538	-0.937876	-0.847056	1.80916
4.6125e-08	0.0705352	0.00924024	0.0061027	0.00792088		4.6125e-08	-0.98978	0.963618	-0.836964	0.753894
4.615e-08	0.0634817	0.00962525	0.00671297	0.0063367		4.615e-08	0.937296	-1.72585	1.51577	0.307072
4.6175e-08	0.0750495	0.00782854	0.00579756	0.00985709		4.6175e-08	-1.93183	-0.903748	-0.670239	0.317468
4.62e-08	0.0710995	0.00693018	0.00640783	0.00792088		4.62e-08	0.317661	-0.215659	-0.36673	1.70269
4.6225e-08	0.0722281	0.00782854	0.0061027	0.00704078		4.6225e-08	1.28886	-1.28734	-1.09009	-1.19051
4.625e-08	0.0705352	0.0087269	0.00732324	0.00598466		4.625e-08	0.0167317	-1.14074	-0.49272	-0.875309
4.6275e-08	0.0674317	0.00808521	0.00717067	0.00510457		4.6275e-08	1.14962	-0.722579	0.54654	0.205922
4.63e-08	0.066021	0.00744353	0.0065604	0.00563263		4.63e-08	0.196553	-0.303767	-2.2374	-0.856449
4.6325e-08	0.0775887	0.0077002	0.00640783	0.00510457		4.6325e-08	-0.115144	0.387493	-1.19792	-0.0802755
4.635e-08	0.0694066	0.00924024	0.0074758	0.0063367		4.635e-08	0.376849	-0.552223	-1.63022	0.85055
4.6375e-08	0.0736388	0.00821355	0.00518729	0.00792088		4.6375e-08	1.51343	-2.03796	-0.883575	0.40051
4.64e-08	0.076178	0.00603183	0.00640783	0.00774486		4.64e-08	-1.0532	0.288269	0.0118002	0.872001
4.6425e-08	0.0784352	0.00859856	0.00671297	0.00668874		4.6425e-08	0.890051	-0.244859	-1.45441	0.421259
4.645e-08	0.0773066	0.00847022	0.0074758	0.00739282		4.645e-08	-1.51971	-1.05178	0.919924	0.43164
4.6475e-08	0.0730745	0.00885523	0.00793351	0.00668874		4.6475e-08	0.264698	-1.58691	1.37503	-1.40674
4.65e-08	0.078153	0.00808521	0.0061027	0.00545661		4.65e-08	2.85974	-0.0728197	-0.38969	2.91931
4.6525e-08	0.0710995	0.00821355	0.00640783	0.00510457		4.6525e-08	-2.62654	-1.29202	-0.0830991	-1.23456
4.655e-08	0.0679959	0.00859856	0.00549243	0.00668874		4.655e-08	1.10303	1.31991	-0.220853	1.09079
4.6575e-08	0.078153	0.00757187	0.00915405	0.00580865		4.6575e-08	-1.154	0.0997944	0.234686	2.49248
4.66e-08	0.0722281	0.00808521	0.0065604	0.00651272		4.66e-08	0.799542	-0.162482	-0.645573	-0.124826
4.6625e-08	0.0713816	0.0103953	0.00640783	0.0072168		4.6625e-08	-0.00138605	-0.0135049	0.107546	0.0398251
4.665e-08	0.064046	0.00821355	0.0061027	0.00704078		4.665e-08	1.95602	-1.1004	2.05169	-1.96385
4.6675e-08	0.0694066	0.0087269	0.00884891	0.00510457		4.6675e-08	-0.794706	-0.677062	-0.0200451	2.85013
4.67e-08	0.0682781	0.00808521	0.00579756	0.00545661		4.67e-08	1.16508	-0.253045	-0.00952686	0.380101
4.6725e-08	0.0637638	0.00680185	0.00671297	0.00739282		4.6725e-08	0.687318	-0.103719	-0.595339	-0.696453
4.675e-08	0.066021	0.00693018	0.00595013	0.00528059		4.675e-08	-0.11685	0.321409	0.459097	-0.687056
4.6775e-08	0.0677138	0.00705852	0.00595013	0.0063367		4.6775e-08	-1.24818	0.609291	-0.425947	0.566303
4.68e-08	0.0708174	0.00795688	0.00686554	0.00651272		4.68e-08	0.0648923	-0.482569	-1.91013	1.1991
4.6825e-08	0.0764602	0.00898357	0.0070181	0.00580865		4.6825e-08	1.21676	-0.471192	-0.704772	-1.12612
4.685e-08	0.0657388	0.00667351	0.00793351	0.00774486		4.685e-08	-0.569523	0.369635	-0.0962081	0.44145
4.6875e-08	0.0677138	0.0077002	0.00671297	0.00580865		4.6875e-08	1.89122	0.104974	0.962643	1.07557
4.69e-08	0.0637638	0.00859856	0.00732324	0.0063367		4.69e-08	-0.0608897	-0.160131	-0.0754696	-0.00640523
4.6925e-08	0.064046	0.0087269	0.00732324	0.00704078		4.6925e-08	0.930664	0.544376	0.38496	0.315889
4.695e-08	0.0688424	0.00782854	0.00686554	0.00756884		4.695e-08	0.940752	-0.136908	0.545827	-1.3937
4.6975e-08	0.062071	0.00757187	0.00686554	0.00422447		4.6975e-08	0.950839	0.152313	0.706928	0.0231863
4.7e-08	0.0657388	0.00718686	0.0061027	0.0063367		4.7e-08	-0.679888	-1.22504	1.46974	-1.37615
4.7025e-08	0.0646103	0.00834189	0.00518729	0.00774486		4.7025e-08	-0.506865	-1.07532	-1.07702	1.45317
4.705e-08	0.0646103	0.00847022	0.00427189	0.00563263		4.705e-08	0.816728	-1.48196	-0.766276	0.36637
4.7075e-08	0.0682781	0.00847022	0.0065604	0.00457651		4.7075e-08	0.168831	0.895832	0.298541	-0.565186
4.71e-08	0.0634817	0.00744353	0.00533986	0.00545661		4.71e-08	0.0136778	-0.206763	0.15828	-0.241716
4.7125e-08	0.0643281	0.00847022	0.00686554	0.0072168		4.7125e-08	-0.141726	-0.195309	-1.03892	-0.232123
4.715e-08	0.0643281	0.00462012	0.00732324	0.0063367		4.715e-08	-0.462213	-1.4402	-0.576167	-1.00903
4.7175e-08	0.0592496	0.00834189	0.00518729	0.0063367		4.7175e-08	-0.123353	-0.731219	1.09685	0.416763
4.72e-08	0.0629174	0.00757187	0.00778094	0.00598466		4.72e-08	0.711281	-1.13967	-1.16165	1.21457
4.7225e-08	0.0677138	0.00616016	0.00732324	0.00704078		4.7225e-08	0.0602427	-1.96861	0.362066	0.594604
4.725e-08	0.0646103	0.0077002	0.00640783	0.00580865		4.725e-08	3.70707	1.54258	-0.385088	1.86709
4.7275e-08	0.0674317	0.0103953	0.00686554	0.00440049		4.7275e-08	0.078856	-0.266714	-0.981767	-0.490343
4.73e-08	0.0688424	0.00808521	0.00671297	0.0063367		4.73e-08	2.24088	-0.39567	-0.365125	0.625187
4.7325e-08	0.0643281	0.00693018	0.0070181	0.00545661		4.7325e-08	0.594605	-0.946026	1.01197	1.10981
4.735e-08	0.0694066	0.00705852	0.00686554	0.00440049		4.735e-08	1.59936	-1.07579	-1.56135	1.12036
4.7375e-08	0.0722281	0.00667351	0.00595013	0.00704078		4.7375e-08	1.27784	-0.924545	1.18618	-0.928183
4.74e-08	0.066021	0.00757187	0.005645	0.00651272		4.74e-08	-0.372989	0.21203	0.892822	0.0318633
4.7425e-08	0.076178	0.00847022	0.0070181	0.00563263		4.7425e-08	2.12935	-1.18474	-0.772391	-0.275701
4.745e-08	0.0609424	0.0100103	0.00671297	0.0063367		4.745e-08	1.97382	-0.187516	-1.06776	-0.424993
4.7475e-08	0.0682781	0.00898357	0.0074758	0.00563263		4.7475e-08	0.153215	-0.0351252	-2.12667	1.80864
4.75e-08	0.0716638	0.00847022	0.005645	0.00792088		4.75e-08	0.662339	-0.0236997	1.242	0.0706808
4.7525e-08	0.0750495	0.00795688	0.0061027	0.00651272		4.7525e-08	2.17264	-1.14268	0.183193	1.0351
4.755e-08	0.0722281	0.00744353	0.0061027	0.00422447		4.755e-08	-0.152652	-0.283711	0.0405336	-0.0691882
4.7575e-08	0.0691245	0.00847022	0.0074758	0.00704078		4.7575e-08	1.35929	0.152034	-0.102369	-0.378363
4.76e-08	0.0651745	0.00834189	0.00732324	0.00668874		4.76e-08	1.36946	-0.969587	0.520531	-1.16649
4.7625e-08	0.0637638	0.0087269	0.005645	0.00580865		4.7625e-08	-0.794578	1.16732	0.0710921	-1.63662
4.765e-08	0.0696888	0.00821355	0.00640783	0.00563263		4.765e-08	0.0508039	-0.239054	1.30886	0.288501
4.7675e-08	0.0586853	0.00795688	0.0070181	0.0080969		4.7675e-08	1.56747	-1.50573	-1.44418	-0.341106
4.77e-08	0.0671495	0.00705852	0.005645	0.00492855		4.77e-08	1.24252	2.48315	0.409048	-2.09153
4.7725e-08	0.0584032	0.0077002	0.00762837	0.00598466		4.7725e-08	-1.26378	0.647744	1.34231	0.798231
4.775e-08	0.0682781	0.0087269	0.0070181	0.00651272		4.775e-08	-0.41623	-0.336692	0.58384	-0.793814
4.7775e-08	0.062071	0.00898357	0.00503473	0.00545661		4.7775e-08	-0.575483	0.101672	-1.56224	0.658223
4.78e-08	0.0609424	0.00693018	0.00671297	0.00492855		4.78e-08	-0.230576	-1.31252	-2.47836	-0.775945
4.7825e-08	0.0612246	0.00757187	0.0061027	0.00616068		4.7825e-08	0.114838	-0.588948	-1.08168	-1.0882
4.785e-08	0.0668674	0.00821355	0.00625527	0.00616068		4.785e-08	0.965955	-0.00701967	-0.918066	-0.436672
4.7875e-08	0.0716638	0.00834189	0.00671297	0.00457651		4.7875e-08	0.638677	0.718728	-1.52683	-0.266668
4.79e-08	0.0615067	0.00795688	0.00579756	0.00598466		4.79e-08	2.8407	-0.270552	-0.899405	1.51316
4.7925e-08	0.0592496	0.00795688	0.0070181	0.00651272		4.7925e-08	0.488941	1.45804	0.657555	-1.37564
4.795e-08	0.0595317	0.00821355	0.00579756	0.00651272		4.795e-08	-1.02186	-1.10797	-1.1905	0.08364
4.7975e-08	0.0677138	0.00744353	0.00518729	0.0063367		4.7975e-08	0.16966	-0.667549	-0.0963798	-0.390794
4.8e-08	0.0637638	0.00551848	0.00686554	0.00651272		4.8e-08	-0.497877	0.634408	0.534044	-0.381622
4.8025e-08	0.0696888	0.00859856	0.00579756	0.0063367		4.8025e-08	-0.489263	-0.502621	-0.542256	-0.695605
4.805e-08	0.064046	0.00731519	0.00640783	0.00774486		4.805e-08	0.705325	-0.348149	-0.0666123	-0.363302
4.8075e-08	0.0648924	0.00731519	0.0065604	0.00580865		4.8075e-08	1.05394	0.23801	-0.367672	-0.354151
4.81e-08	0.0643281	0.00718686	0.00717067	0.00580865		4.81e-08	0.0455954	0.249342	-0.202403	-0.0211137
4.8125e-08	0.0665852	0.00693018	0.0074758	0.00580865		4.8125e-08	2.09233	0.548778	0.741731	1.77102
4.815e-08	0.0646103	0.00551848	0.00839121	0.00651272		4.815e-08	-0.276308	-1.16966	1.68732	0.646449
4.8175e-08	0.064046	0.00526181	0.0061027	0.00651272		4.8175e-08	0.242642	-0.00521154	2.01049	-1.77837
4.82e-08	0.0651745	0.00654517	0.00808607	0.00580865		4.82e-08	-0.769431	1.3055	0.305029	-0.470817
4.8225e-08	0.0648924	0.00641684	0.005645	0.00580865		4.8225e-08	-1.10174	0.739593	-1.09068	2.13922
4.825e-08	0.0592496	0.0087269	0.00686554	0.00739282		4.825e-08	-0.241359	0.895909	0.481671	-0.127379
4.8275e-08	0.0651745	0.00795688	0.00595013	0.00580865		4.8275e-08	-1.08558	1.05244	0.335487	-0.443731
4.83e-08	0.0654567	0.00680185	0.00595013	0.00651272		4.83e-08	0.288239	0.484887	-1.68979	0.54289
4.8325e-08	0.0623531	0.00705852	0.00732324	0.00492855		4.8325e-08	0.126494	1.36618	-0.897778	-0.262651
4.835e-08	0.062071	0.00821355	0.00472959	0.00686476		4.835e-08	-0.548443	-1.3785	-0.104556	-1.06943
4.8375e-08	0.0651745	0.00603183	0.00549243	0.00422447		4.8375e-08	-0.197775	-1.36858	-0.408656	-2.20407
4.84e-08	0.0691245	0.00680185	0.00671297	0.00528059		4.84e-08	1.18084	-0.922688	0.229092	0.581903
4.8425e-08	0.0674317	0.00705852	0.00839121	0.00739282		4.8425e-08	0.847863	-1.63963	0.710638	-0.226113
4.845e-08	0.0677138	0.00693018	0.00533986	0.00545661		4.845e-08	0.17138	1.71792	-1.00925	-0.0532908
4.8475e-08	0.0626353	0.00795688	0.00595013	0.00492855		4.8475e-08	1.38175	-1.3289	-0.527945	0.283585
4.85e-08	0.0682781	0.00577515	0.00686554	0.00704078		4.85e-08	0.18934	-1.02741	-0.518539	-1.01834
4.8525e-08	0.0564282	0.00680185	0.00472959	0.00668874		4.8525e-08	1.57341	-1.16318	2.17112	0.138541
4.855e-08	0.054171	0.00731519	0.005645	0.00422447		4.855e-08	0.0352549	-1.15318	0.289168	0.147909
4.8575e-08	0.0589674	0.00641684	0.00671297	0.00563263		4.8575e-08	-0.300213	-1.72774	-0.0166522	-0.171335
4.86e-08	0.0648924	0.00590349	0.00472959	0.00686476		4.86e-08	-1.66987	0.621912	1.41534	0.331064
4.8625e-08	0.0626353	0.00616016	0.00549243	0.00792088		4.8625e-08	-1.48994	0.340558	-0.155308	-1.14043
4.865e-08	0.0564282	0.00539014	0.00503473	0.00475253		4.865e-08	1.27835	-1.25968	0.645679	0.185366
4.8675e-08	0.062071	0.00731519	0.00533986	0.00580865		4.8675e-08	-0.265936	0.216289	0.0223494	-0.464477
4.87e-08	0.0584032	0.0062885	0.00533986	0.00528059		4.87e-08	0.433846	1.1077	0.190625	-0.125745
4.8725e-08	0.0663031	0.00693018	0.00778094	0.00545661		4.8725e-08	0.0970809	-0.789491	-2.3377	0.378543
4.875e-08	0.0665852	0.0077002	0.00640783	0.00563263		4.875e-08	-1.27859	0.396415	2.1155	-0.768225
4.8775e-08	0.0696888	0.0077002	0.00411932	0.00457651		4.8775e-08	-0.751233	1.43711	-0.0975206	0.232216
4.88e-08	0.0699709	0.00924024	0.00427189	0.00440049		4.88e-08	-0.0497693	-1.34761	-0.723928	-0.916449
4.8825e-08	0.0609424	0.00641684	0.00762837	0.00404845		4.8825e-08	0.652738	-1.6325	-1.03307	0.0853601
4.885e-08	0.0612246	0.00782854	0.00900148	0.00387243		4.885e-08	-0.0324062	-2.06529	-0.864945	0.425945
4.8875e-08	0.064046	0.00667351	0.00640783	0.00616068		4.8875e-08	-1.23975	0.157029	-0.855951	-1.05685
4.89e-08	0.0668674	0.00603183	0.00671297	0.0063367		4.89e-08	1.37576	-0.71804	-1.00645	-0.218838
4.8925e-08	0.0555817	0.00693018	0.00411932	0.0063367		4.8925e-08	-1.22422	0.917746	0.917843	0.620438
4.895e-08	0.056146	0.00757187	0.00671297	0.00475253		4.895e-08	-0.345882	-0.40183	-1.94714	0.63005
4.8975e-08	0.058121	0.00500513	0.00488216	0.00616068		4.8975e-08	-0.511699	1.23678	0.299099	-0.0255863
4.9e-08	0.0606603	0.00718686	0.00533986	0.00580865		4.9e-08	-0.677785	0.211579	0.788916	0.149952
4.9025e-08	0.0623531	0.00539014	0.00549243	0.00422447		4.9025e-08	0.202909	0.074222	0.639024	-0.173957
4.905e-08	0.0612246	0.00654517	0.00579756	0.00545661		4.905e-08	-0.661489	-0.0633814	0.328644	-0.998449
4.9075e-08	0.060096	0.00693018	0.00457702	0.00651272		4.9075e-08	-1.35244	-1.24063	-0.944371	2.3462
4.91e-08	0.0595317	0.00718686	0.0065604	0.00563263		4.91e-08	-1.51973	-0.190708	-0.614564	0.520678
4.9125e-08	0.0634817	0.00808521	0.00579756	0.00598466		4.9125e-08	-0.462034	-0.775076	-0.444867	0.363068
4.915e-08	0.0646103	0.00705852	0.00884891	0.00704078		4.915e-08	0.0717444	-0.913863	-1.23927	1.04119
4.9175e-08	0.0677138	0.00731519	0.00686554	0.00686476		4.9175e-08	-1.49728	0.138784	-0.10472	0.0471022
4.92e-08	0.0586853	0.00705852	0.00686554	0.00510457		4.92e-08	0.0890973	-0.297676	-2.02692	-0.613603
4.9225e-08	0.0578389	0.00731519	0.0065604	0.00457651		4.9225e-08	-0.780053	0.0111272	1.3641	-0.102293
4.925e-08	0.0606603	0.00654517	0.0065604	0.00598466		4.925e-08	-0.772044	-1.17274	-1.20484	0.242069
4.9275e-08	0.0657388	0.00744353	0.00549243	0.00563263		4.9275e-08	-1.1157	0.480696	-1.68028	0.0834428
4.93e-08	0.0603781	0.00616016	0.00396675	0.00528059		4.93e-08	0.651657	0.641221	0.265548	-1.08318
4.9325e-08	0.064046	0.00667351	0.00732324	0.0080969		4.9325e-08	0.660708	-0.994044	-1.50227	-0.738841
4.935e-08	0.0555817	0.00693018	0.00595013	0.00580865		4.935e-08	2.07958	0.0642442	0.931797	0.110638
4.9375e-08	0.062071	0.00731519	0.0065604	0.00492855		4.9375e-08	-0.379357	-0.67467	-1.00009	-0.721985
4.94e-08	0.0547353	0.00449179	0.00518729	0.00580865		4.94e-08	-1.07707	1.43569	-0.667455	-0.376624
4.9425e-08	0.0606603	0.00539014	0.00503473	0.00739282		4.9425e-08	-0.539464	-0.954906	0.31403	0.475027
4.945e-08	0.0558639	0.00577515	0.00472959	0.00528059		4.945e-08	-0.531333	-0.494329	0.648162	-0.527961
4.9475e-08	0.0722281	0.0077002	0.00442446	0.0063367		4.9475e-08	0.361264	-0.484181	0.00876867	0.83138
4.95e-08	0.0538889	0.00757187	0.0061027	0.00704078		4.95e-08	-0.692106	-1.67804	-0.631626	-1.69366
4.9525e-08	0.0595317	0.00513347	0.00472959	0.00387243		4.9525e-08	1.79612	0.138562	0.678005	1.18874
4.955e-08	0.0572746	0.00808521	0.00396675	0.00545661		4.955e-08	1.27408	-0.303057	-1.75272	1.70624
4.9575e-08	0.0584032	0.00551848	0.0065604	0.00352039		4.9575e-08	0.573816	-3.00825	0.0465244	-0.993283
4.96e-08	0.0578389	0.00693018	0.00381419	0.00545661		4.96e-08	2.18076	-1.33943	0.707789	0.370755
4.9625e-08	0.0572746	0.00705852	0.00533986	0.00528059		4.9625e-08	-0.474535	-0.725657	-0.75004	-2.16427
4.965e-08	0.0533246	0.00693018	0.00579756	0.00422447		4.965e-08	-0.466426	-0.866997	-0.414814	0.0496289
4.9675e-08	0.0631995	0.00577515	0.00488216	0.00492855		4.9675e-08	1.3213	-0.403237	-1.38575	0.907905
4.97e-08	0.066021	0.00564682	0.00549243	0.00563263		4.97e-08	-0.272105	0.212697	0.747525	-0.612502
4.9725e-08	0.060096	0.00654517	0.00533986	0.00475253		4.9725e-08	0.983749	0.223294	-0.551208	0.756924
4.975e-08	0.0592496	0.00564682	0.00396675	0.00598466		4.975e-08	0.636203	0.992347	-1.0334	1.10687
4.9775e-08	0.0586853	0.00680185	0.00503473	0.00492855		4.9775e-08	0.288113	-0.514597	-1.51636	1.96847
4.98e-08	0.0530425	0.00577515	0.00442446	0.00668874		4.98e-08	-0.775047	-0.0488312	1.11516	0.103172
4.9825e-08	0.062071	0.00539014	0.00518729	0.00510457		4.9825e-08	0.126604	2.24226	-0.0232698	0.794635
4.985e-08	0.0530425	0.00577515	0.00823864	0.00404845		4.985e-08	-0.222705	0.732666	0.642855	-0.903627
4.9875e-08	0.0527603	0.00539014	0.00503473	0.00616068		4.9875e-08	-0.0354473	-0.170159	0.488308	1.15527
4.99e-08	0.0629174	0.00654517	0.00640783	0.00404845		4.99e-08	0.331252	-0.617187	-1.47556	0.309821
[truncated: 6,491 more rows]

## Sheet: Figure 4 - C_D
C							D
TCSPC							TCSPC
resting		active					0uM	1uM	320uM
average dist, r, resting	standarad deviation, sig, resting	average dist, r, active	standard deviation, sig, active				0.233517	0.829755	0.92475
41.4762	3.13048	29.1252	3.72097				0.244028	0.835087	0.939187
41.4994	3.48104	28.9517	4.03791				0.265722	0.856906	0.941434
41.9022	3.65391	29.1192	3.99142				0.26928	0.86732	0.945549
41.8833	4.07114	29.1069	4.45833

## Sheet: Figure 4 - E
Distance	Apo-1	Apo-2	Apo-3	Apo-4	1uM cAMP- 1	1uM cAMP- 2	1uM cAMP- 3	1uM cAMP- 4	320uM cAMP - 1	320uM cAMP - 2	320uM cAMP - 3	320uM cAMP - 4		chiLife_Resting	chiLife_Active
0	1.1602e-11	6.75924e-14	1.8029e-13	1.43397e-15	4.12251e-11	2.31308e-13	5.81402e-13	4.61866e-15	4.67737e-11	2.56143e-13	6.37229e-13	5.03524e-15		0	0
0.392157	1.55342e-11	9.72997e-14	2.56845e-13	2.18085e-15	5.51974e-11	3.32969e-13	8.28278e-13	7.02428e-15	6.26266e-11	3.6872e-13	9.07811e-13	7.65784e-15		0	0
0.784314	2.07573e-11	1.39712e-13	3.6501e-13	3.30718e-15	7.37567e-11	4.78109e-13	1.17709e-12	1.06521e-14	8.36838e-11	5.29444e-13	1.29012e-12	1.16128e-14		0	0
1.17647	2.76808e-11	2.00109e-13	5.17456e-13	5.00074e-15	9.83581e-11	6.84794e-13	1.6687e-12	1.61068e-14	1.11596e-10	7.5832e-13	1.82893e-12	1.75596e-14		0	0
1.56863	3.68395e-11	2.85897e-13	7.31773e-13	7.53974e-15	1.30902e-10	9.78368e-13	2.35984e-12	2.42847e-14	1.4852e-10	1.08342e-12	2.58643e-12	2.6475e-14		0	0
1.96078	4.893e-11	4.07439e-13	1.03232e-12	1.13351e-14	1.73862e-10	1.39429e-12	3.32904e-12	3.6509e-14	1.97263e-10	1.544e-12	3.6487e-12	3.98019e-14		0	0
2.35294	6.48577e-11	5.79194e-13	1.45273e-12	1.69917e-14	2.30458e-10	1.98206e-12	4.68481e-12	5.47283e-14	2.61476e-10	2.19487e-12	5.13465e-12	5.96646e-14		0	0
2.7451	8.57974e-11	8.21287e-13	2.03936e-12	2.53977e-14	3.04863e-10	2.81052e-12	6.57655e-12	8.18032e-14	3.45896e-10	3.11229e-12	7.20805e-12	8.91814e-14		0	0
3.13725	1.1327e-10	1.16165e-12	2.85584e-12	3.78528e-14	4.02479e-10	3.97528e-12	9.20958e-12	1.2192e-13	4.5665e-10	4.40211e-12	1.00939e-11	1.32916e-13		0	0
3.52941	1.49237e-10	1.63895e-12	3.98943e-12	5.62531e-14	5.30284e-10	5.60865e-12	1.28652e-11	1.81185e-13	6.01657e-10	6.21085e-12	1.41005e-11	1.97527e-13		0	0
3.92157	1.96232e-10	2.30657e-12	5.55931e-12	8.33567e-14	6.97267e-10	7.8933e-12	1.79278e-11	2.68483e-13	7.91115e-10	8.7408e-12	1.96492e-11	2.92699e-13		0	0
4.31373	2.57505e-10	3.23799e-12	7.72798e-12	1.23163e-13	9.1499e-10	1.10807e-11	2.49213e-11	3.96694e-13	1.03814e-09	1.22705e-11	2.73143e-11	4.32474e-13		0	0
4.70588	3.37232e-10	4.53414e-12	1.07163e-11	1.81453e-13	1.19828e-09	1.55163e-11	3.45582e-11	5.8444e-13	1.35956e-09	1.71822e-11	3.78765e-11	6.37154e-13		0	0
5.09804	4.40755e-10	6.33321e-12	1.48238e-11	2.6656e-13	1.56613e-09	2.16729e-11	4.78041e-11	8.58559e-13	1.77692e-09	2.39999e-11	5.23943e-11	9.35997e-13		0	0
5.4902	5.749e-10	8.82394e-12	2.04554e-11	3.90454e-13	2.04279e-09	3.01963e-11	6.5965e-11	1.25761e-12	2.31773e-09	3.34385e-11	7.22991e-11	1.37104e-12		0	0
5.88235	7.48365e-10	1.22634e-11	2.81573e-11	5.70283e-13	2.65916e-09	4.19665e-11	9.08023e-11	1.83682e-12	3.01706e-09	4.64724e-11	9.95213e-11	2.00249e-12		0	0
6.27451	9.72211e-10	1.70007e-11	3.86642e-11	8.30532e-13	3.45455e-09	5.81782e-11	1.24685e-10	2.67505e-12	3.9195e-09	6.44248e-11	1.36658e-10	2.91633e-12		0	0
6.66667	1.26047e-09	2.3509e-11	5.29617e-11	1.20606e-12	4.47882e-09	8.04502e-11	1.70792e-10	3.88457e-12	5.08164e-09	8.90882e-11	1.87192e-10	4.23494e-12		0	0
7.05882	1.63092e-09	3.24274e-11	7.23683e-11	1.74632e-12	5.79513e-09	1.1097e-10	2.33375e-10	5.6247e-12	6.57511e-09	1.22884e-10	2.55784e-10	6.13203e-12		0	0
7.45098	2.106e-09	4.46168e-11	9.86438e-11	2.52131e-12	7.48321e-09	1.52683e-10	3.18108e-10	8.12085e-12	8.4904e-09	1.69076e-10	3.48654e-10	8.85332e-12		0	0
7.84314	2.71399e-09	6.12342e-11	1.3413e-10	3.62972e-12	9.6436e-09	2.09549e-10	4.32545e-10	1.16909e-11	1.09416e-08	2.32049e-10	4.74079e-10	1.27454e-11		0	0
8.23529	3.49048e-09	8.383e-11	1.81935e-10	5.21034e-12	1.24027e-08	2.86874e-10	5.86708e-10	1.67819e-11	1.4072e-08	3.17676e-10	6.43045e-10	1.82956e-11		0	0
8.62745	4.48011e-09	1.14476e-10	2.46174e-10	7.45768e-12	1.59191e-08	3.91748e-10	7.93865e-10	2.40203e-11	1.80617e-08	4.3381e-10	8.70094e-10	2.61869e-11		0	0
9.01961	5.73876e-09	1.55934e-10	3.32278e-10	1.06436e-11	2.03915e-08	5.33619e-10	1.07154e-09	3.42817e-11	2.3136e-08	5.90914e-10	1.17443e-09	3.73738e-11		0	0
9.41176	7.33623e-09	2.11872e-10	4.474e-10	1.51466e-11	2.60678e-08	7.25047e-10	1.44278e-09	4.87855e-11	2.95763e-08	8.02895e-10	1.58132e-09	5.31858e-11		0	0
9.80392	9.35953e-09	2.87156e-10	6.00931e-10	2.14926e-11	3.32571e-08	9.82675e-10	1.93789e-09	6.92253e-11	3.77333e-08	1.08818e-09	2.12397e-09	7.54691e-11		0	0
10.1961	1.19169e-08	3.88214e-10	8.0517e-10	3.04094e-11	4.2344e-08	1.32851e-09	2.59653e-09	9.79454e-11	4.80432e-08	1.47115e-09	2.84585e-09	1.0678e-10		0	0
10.5882	1.51424e-08	5.23521e-10	1.07618e-09	4.29015e-11	5.38053e-08	1.79154e-09	3.47049e-09	1.38181e-10	6.10472e-08	1.9839e-09	3.80373e-09	1.50644e-10		0	0
10.9804	1.92023e-08	7.04218e-10	1.43489e-09	6.03508e-11	6.82315e-08	2.4099e-09	4.62725e-09	1.94383e-10	7.74149e-08	2.66865e-09	5.07157e-09	2.11916e-10		0	0
11.3725	2.43018e-08	9.44907e-10	1.90847e-09	8.46521e-11	8.63515e-08	3.23356e-09	6.15446e-09	2.72655e-10	9.79738e-08	3.58075e-09	6.74543e-09	2.97247e-10		0	0
11.7647	3.06938e-08	1.26468e-09	2.53213e-09	1.18396e-10	1.09064e-07	4.32786e-09	8.16567e-09	3.81341e-10	1.23743e-07	4.79254e-09	8.94975e-09	4.15737e-10		0	0
12.1569	3.8689e-08	1.68843e-09	3.35137e-09	1.65114e-10	1.37473e-07	5.77796e-09	1.08076e-08	5.31814e-10	1.55976e-07	6.39834e-09	1.18453e-08	5.79781e-10		0	0
12.549	4.86689e-08	2.2485e-09	4.4248e-09	2.29602e-10	1.72935e-07	7.6946e-09	1.42692e-08	7.39522e-10	1.9621e-07	8.52076e-09	1.56393e-08	8.06223e-10		0	0
12.9412	6.10999e-08	2.98686e-09	5.82772e-09	3.18355e-10	2.17106e-07	1.02213e-08	1.87933e-08	1.02539e-09	2.46327e-07	1.13188e-08	2.05979e-08	1.11787e-09		0	0
13.3333	7.65519e-08	3.95772e-09	7.65664e-09	4.40143e-10	2.72011e-07	1.35437e-08	2.46913e-08	1.41765e-09	3.08622e-07	1.49979e-08	2.70622e-08	1.54552e-09		0	0
13.7255	9.57189e-08	5.231e-09	1.00349e-08	6.06765e-10	3.40117e-07	1.7901e-08	3.23607e-08	1.95432e-09	3.85894e-07	1.9823e-08	3.5468e-08	2.13059e-09		0	0
14.1176	1.19444e-07	6.89658e-09	1.31196e-08	8.34052e-10	4.2442e-07	2.36008e-08	4.23084e-08	2.68639e-09	4.81544e-07	2.61348e-08	4.6371e-08	2.92869e-09		0	0
14.5098	1.48751e-07	9.0697e-09	1.71106e-08	1.14317e-09	5.28554e-07	3.10374e-08	5.51786e-08	3.68202e-09	5.99693e-07	3.43699e-08	6.04769e-08	4.01413e-09		0	0
14.902	1.84875e-07	1.18977e-08	2.22609e-08	1.56233e-09	6.56914e-07	4.07149e-08	7.17874e-08	5.0321e-09	7.4533e-07	4.50865e-08	7.86806e-08	5.48598e-09		0	0
15.2941	2.2931e-07	1.55682e-08	2.88905e-08	2.12903e-09	8.14806e-07	5.3276e-08	9.31667e-08	6.85738e-09	9.24473e-07	5.89963e-08	1.02113e-07	7.47588e-09		0	0
15.6863	2.83854e-07	2.03202e-08	3.74027e-08	2.89292e-09	1.00862e-06	6.95376e-08	1.20617e-07	9.31777e-09	1.14437e-06	7.70038e-08	1.32199e-07	1.01582e-08		0	0
16.0784	3.50665e-07	2.6456e-08	4.83041e-08	3.91954e-09	1.24602e-06	9.05351e-08	1.55772e-07	1.26244e-08	1.41372e-06	1.00256e-07	1.7073e-07	1.37631e-08		0	0
16.4706	4.32331e-07	3.43583e-08	6.22301e-08	5.29517e-09	1.5362e-06	1.17577e-07	2.00681e-07	1.70551e-08	1.74296e-06	1.30202e-07	2.19951e-07	1.85934e-08		0	0
16.8627	5.31944e-07	4.45091e-08	7.99745e-08	7.13295e-09	1.89015e-06	1.52314e-07	2.57903e-07	2.29744e-08	2.14455e-06	1.68668e-07	2.82668e-07	2.50466e-08		0	0
17.2549	6.53193e-07	5.75141e-08	1.02527e-07	9.58086e-09	2.32098e-06	1.96819e-07	3.3063e-07	3.08589e-08	2.63337e-06	2.17951e-07	3.62378e-07	3.36422e-08		0	0
17.6471	8.00467e-07	7.41328e-08	1.31116e-07	1.28317e-08	2.84429e-06	2.53689e-07	4.22826e-07	4.13295e-08	3.22711e-06	2.80928e-07	4.63427e-07	4.50573e-08		0	0
18.0392	9.78974e-07	9.53138e-08	1.67267e-07	1.7136e-08	3.47858e-06	3.26173e-07	5.39407e-07	5.51933e-08	3.94677e-06	3.61194e-07	5.91202e-07	6.01715e-08		0	6.03e-09
18.4314	1.19488e-06	1.22239e-07	2.12863e-07	2.28182e-08	4.24576e-06	4.18314e-07	6.86444e-07	7.34949e-08	4.81721e-06	4.63229e-07	7.52358e-07	8.01238e-08		0	8.32e-08
18.8235	1.45547e-06	1.56378e-07	2.70224e-07	3.02969e-08	5.17172e-06	5.3514e-07	8.71423e-07	9.75828e-08	5.8678e-06	5.92598e-07	9.55099e-07	1.06384e-07		0	5.38e-07
19.2157	1.76934e-06	1.99549e-07	3.42201e-07	4.01106e-08	6.28696e-06	6.82875e-07	1.10354e-06	1.29192e-07	7.13314e-06	7.56196e-07	1.2095e-06	1.40844e-07		0	2.57e-06
19.6078	2.14656e-06	2.54e-07	4.32289e-07	5.295e-08	7.62733e-06	8.69211e-07	1.39405e-06	1.70546e-07	8.65392e-06	9.62538e-07	1.52791e-06	1.85929e-07		0	9.67e-06
20	2.59896e-06	3.22497e-07	5.44755e-07	6.96977e-08	9.23486e-06	1.10362e-06	1.75674e-06	2.24489e-07	1.04778e-05	1.22211e-06	1.92542e-06	2.44737e-07		0	3.02e-05
20.3922	3.14039e-06	4.08441e-07	6.84799e-07	9.14779e-08	1.11587e-05	1.39772e-06	2.20835e-06	2.9464e-07	1.26606e-05	1.5478e-06	2.4204e-06	3.21215e-07		0	8.19e-05
20.7843	3.78699e-06	5.1599e-07	8.58736e-07	1.19718e-07	1.34563e-05	1.76577e-06	2.76927e-06	3.85598e-07	1.52674e-05	1.95536e-06	3.03518e-06	4.20377e-07		0	0.00019796
21.1765	4.55753e-06	6.50225e-07	1.07421e-06	1.56224e-07	1.61942e-05	2.22513e-06	3.46414e-06	5.0318e-07	1.83739e-05	2.46405e-06	3.79678e-06	5.48564e-07		0	0.000430387
21.5686	5.47383e-06	8.17326e-07	1.34047e-06	2.03274e-07	1.94501e-05	2.79697e-06	4.32276e-06	6.54722e-07	2.2068e-05	3.09728e-06	4.73784e-06	7.13775e-07		0	0.000846639
21.9608	6.56114e-06	1.02479e-06	1.66861e-06	2.6373e-07	2.33136e-05	3.50694e-06	5.38098e-06	8.49446e-07	2.64515e-05	3.88349e-06	5.89767e-06	9.26062e-07		0	0.00151891
22.3529	7.84862e-06	1.2817e-06	2.072e-06	3.41181e-07	2.78884e-05	4.38611e-06	6.68184e-06	1.0989e-06	3.1642e-05	4.85705e-06	7.32344e-06	1.19802e-06		0	0.00250823
22.7451	9.36986e-06	1.599e-06	2.56661e-06	4.40103e-07	3.32938e-05	5.47193e-06	8.27685e-06	1.41752e-06	3.7775e-05	6.05945e-06	9.07161e-06	1.54538e-06		0	0.00386033
23.1373	1.11635e-05	1.98984e-06	3.17149e-06	5.66068e-07	3.96671e-05	6.80942e-06	1.02275e-05	1.82324e-06	4.5006e-05	7.54055e-06	1.12095e-05	1.98769e-06		0	0.00562225
23.5294	1.32737e-05	2.47e-06	3.90932e-06	7.25987e-07	4.71652e-05	8.45259e-06	1.26069e-05	2.33832e-06	5.35133e-05	9.36015e-06	1.38174e-05	2.54923e-06		0	0.00787296
23.9216	1.5751e-05	3.05835e-06	4.807e-06	9.28399e-07	5.5968e-05	1.0466e-05	1.55017e-05	2.99027e-06	6.35009e-05	1.15897e-05	1.69902e-05	3.25998e-06		4.74e-11	0.0107472
24.3137	1.86532e-05	3.77734e-06	5.89633e-06	1.18382e-06	6.62802e-05	1.29264e-05	1.90146e-05	3.81295e-06	7.52011e-05	1.43143e-05	2.08404e-05	4.15686e-06		1.56e-09	0.014422
24.7059	2.20457e-05	4.65366e-06	7.21479e-06	1.50516e-06	7.83347e-05	1.59253e-05	2.32664e-05	4.84794e-06	8.8878e-05	1.76352e-05	2.55005e-05	5.2852e-06		1.82e-08	0.0190694
25.098	2.60028e-05	5.7189e-06	8.80643e-06	1.9082e-06	9.23954e-05	1.95706e-05	2.83991e-05	6.14609e-06	0.000104831	2.16719e-05	3.11261e-05	6.70044e-06		1.3e-07	0.0248075
25.4902	3.06085e-05	7.01035e-06	1.07229e-05	2.41218e-06	0.000108761	2.39901e-05	3.45793e-05	7.76937e-06	0.000123399	2.65659e-05	3.78997e-05	8.47013e-06		6.44e-07	0.0316948
25.8824	3.59575e-05	8.5719e-06	1.30244e-05	3.04048e-06	0.000127768	2.93339e-05	4.20012e-05	9.79305e-06	0.000144964	3.24834e-05	4.60343e-05	1.06763e-05		2.71e-06	0.0397831
26.2745	4.21565e-05	1.0455e-05	1.57811e-05	3.82138e-06	0.000149794	3.5778e-05	5.08911e-05	1.23082e-05	0.000169955	3.96195e-05	5.57778e-05	1.34184e-05		9.01e-06	0.0492085
26.6667	4.93247e-05	1.27198e-05	1.90744e-05	4.78898e-06	0.000175265	4.35284e-05	6.15115e-05	1.54248e-05	0.000198854	4.8202e-05	6.7418e-05	1.6816e-05		2.56e-05	0.0602649
27.0588	5.75958e-05	1.54364e-05	2.29986e-05	5.98426e-06	0.000204655	5.28249e-05	7.41662e-05	1.92746e-05	0.0002322	5.84967e-05	8.12878e-05	2.10131e-05		6.47e-05	0.0734197
27.451	6.71186e-05	1.86862e-05	2.7662e-05	7.45632e-06	0.000238492	6.39461e-05	8.92051e-05	2.4016e-05	0.000270591	7.0812e-05	9.77707e-05	2.61821e-05		0.000146103	0.089232
27.8431	7.80587e-05	2.25635e-05	3.31896e-05	9.26367e-06	0.000277365	7.72145e-05	0.000107031	2.98372e-05	0.000314697	8.55051e-05	0.000117308	3.25284e-05		0.000297552	0.108149
28.2353	9.05995e-05	2.7177e-05	3.97242e-05	1.14759e-05	0.000321926	9.30023e-05	0.000128103	3.69626e-05	0.000365255	0.000102988	0.000140404	4.02965e-05		0.000548721	0.130165
28.6275	0.000104944	3.26517e-05	4.74289e-05	1.41754e-05	0.000372895	0.000111737	0.00015295	4.56575e-05	0.000423084	0.000123735	0.000167636	4.97756e-05		0.000923932	0.154405
29.0196	0.000121314	3.91309e-05	5.64891e-05	1.74595e-05	0.000431065	0.00013391	0.000182167	5.62351e-05	0.000489084	0.000148288	0.000199659	6.13072e-05		0.0014352	0.178787
29.4118	0.000139957	4.67782e-05	6.71153e-05	2.14423e-05	0.000497308	0.000160079	0.000216435	6.90633e-05	0.000564242	0.000177267	0.000237217	7.52925e-05		0.00208307	0.200028
29.8039	0.00016114	5.57798e-05	7.9545e-05	2.62577e-05	0.000572577	0.000190884	0.000256518	8.45732e-05	0.000649642	0.000211379	0.000281149	9.22013e-05		0.00286517	0.214196
30.1961	0.000185156	6.63467e-05	9.40456e-05	3.20618e-05	0.000657913	0.000227045	0.00030328	0.000103267	0.000746463	0.000251423	0.000332401	0.000112582		0.00378533	0.217769
30.5882	0.000212324	7.87176e-05	0.000110917	3.90359e-05	0.000754447	0.000269379	0.000357688	0.00012573	0.00085599	0.000298302	0.000392033	0.00013707		0.00485911	0.208835
30.9804	0.000242988	9.31609e-05	0.000130495	4.73898e-05	0.000863406	0.000318805	0.000420822	0.000152637	0.000979615	0.000353036	0.00046123	0.000166405		0.00611786	0.187908
31.3725	0.000277522	0.000109978	0.000153152	5.73657e-05	0.000986115	0.000376355	0.000493887	0.000184768	0.00111884	0.000416764	0.000541311	0.000201434		0.00761867	0.157967
31.7647	0.000316327	0.000129505	0.000179303	6.92411e-05	0.001124	0.000443178	0.000578218	0.000223018	0.00127528	0.000490762	0.00063374	0.000243133		0.00945755	0.123639
32.1569	0.000359833	0.000152117	0.000209404	8.33338e-05	0.00127859	0.000520558	0.00067529	0.000268409	0.00145068	0.00057645	0.000740133	0.000292618		0.0117637	0.0898539
32.549	0.000408499	0.000178228	0.00024396	0.000100006	0.00145151	0.000609915	0.000786725	0.000322107	0.00164688	0.000675401	0.000862268	0.000351159		0.0146639	0.0605252
32.9412	0.000462815	0.000208299	0.000283521	0.000119666	0.00164452	0.000712819	0.000914304	0.000385432	0.00186586	0.000789354	0.0010021	0.000420196		0.0182181	0.0377622
33.3333	0.0005233	0.000242832	0.000328691	0.000142779	0.00185943	0.000830995	0.00105997	0.000459876	0.0021097	0.000920219	0.00116175	0.000501355		0.02237	0.021838
33.7255	0.000590499	0.000282381	0.000380123	0.000169865	0.00209821	0.000966335	0.00122583	0.000547117	0.00238062	0.00107009	0.00134353	0.000596464		0.026959	0.0117343
34.1176	0.000664988	0.000327547	0.000438526	0.000201506	0.00236289	0.0011209	0.00141417	0.000649029	0.00268092	0.00124125	0.00154996	0.000707568		0.0317905	0.00588593
34.5098	0.000747369	0.000378985	0.000504663	0.000238351	0.00265561	0.00129692	0.00162745	0.000767703	0.00301304	0.00143617	0.00178372	0.000836946		0.0367343	0.00277608
34.902	0.000838266	0.000437401	0.000579351	0.00028112	0.0029786	0.00149683	0.0018683	0.000905457	0.00337949	0.00165754	0.0020477	0.000987125		0.0417718	0.00124291
35.2941	0.000938328	0.000503556	0.000663463	0.000330607	0.00333414	0.00172322	0.00213955	0.00106485	0.0037829	0.00190824	0.00234499	0.00116089		0.0469825	0.000533758
35.6863	0.00104822	0.000578262	0.000757924	0.000387684	0.00372463	0.00197887	0.00244417	0.00124869	0.00422594	0.00219134	0.00267886	0.00136131		0.0524838	0.000222681
36.0784	0.00116863	0.000662386	0.000863714	0.000453302	0.00415248	0.00226675	0.00278532	0.00146004	0.00471138	0.00251013	0.00305277	0.00159173		0.0583707	9.06e-05
36.4706	0.00130026	0.000756846	0.000981857	0.000528499	0.00462018	0.00259	0.00316631	0.00170224	0.00524202	0.00286809	0.00347035	0.00185577		0.0646821	3.57e-05
36.8627	0.0014438	0.000862608	0.00111343	0.000614392	0.00513022	0.00295192	0.0035906	0.00197889	0.00582071	0.00326887	0.00393537	0.00215737		0.0714027	1.34e-05
37.2549	0.00159997	0.000980683	0.00125953	0.000712184	0.00568511	0.00335599	0.00406176	0.00229386	0.00645028	0.00371632	0.00445178	0.00250076		0.0785152	4.67e-06
37.6471	0.00176946	0.00111213	0.00142132	0.000823159	0.00628735	0.0038058	0.00458349	0.0026513	0.00713358	0.00421443	0.00502361	0.00289044		0.0860625	1.47e-06
38.0392	0.00195297	0.00125802	0.00159996	0.000948683	0.00693941	0.00430507	0.00515957	0.0030556	0.0078734	0.00476731	0.005655	0.0033312		0.0941818	4e-07
38.4314	0.00215118	0.00141949	0.00179663	0.00109019	0.0076437	0.00485763	0.00579382	0.00351139	0.00867248	0.00537919	0.00635015	0.0038281		0.103069	8.13e-08
38.8235	0.00236475	0.00159767	0.00201254	0.0012492	0.00840254	0.00546737	0.00649009	0.00402353	0.00953346	0.0060544	0.00711328	0.00438644		0.112859	9.29e-09
39.2157	0.00259429	0.0017937	0.00224888	0.00142727	0.00921814	0.00613821	0.00725222	0.00459706	0.0104588	0.00679727	0.00794859	0.0050117		0.123463	0
39.6078	0.0028404	0.00200874	0.00250681	0.00162601	0.0100926	0.00687408	0.008084	0.0052372	0.011451	0.00761215	0.00886024	0.00570957		0.134431	0
40	0.0031036	0.00224391	0.00278747	0.00184709	0.0110278	0.00767886	0.00898909	0.00594926	0.012512	0.00850334	0.00985224	0.00648586		0.14486	0
40.3922	0.00338438	0.00250033	0.00309196	0.00209217	0.0120254	0.00855636	0.00997102	0.00673864	0.0136439	0.00947506	0.0109285	0.00734643		0.153371	0
40.7843	0.00368314	0.00277907	0.00342132	0.00236293	0.0130869	0.00951023	0.0110331	0.00761074	0.0148483	0.0105313	0.0120925	0.00829719		0.158201	0
41.1765	0.00400022	0.00308114	0.00377647	0.00266104	0.0142134	0.0105439	0.0121784	0.0085709	0.0161265	0.011676	0.0133478	0.00934396		0.157476	0
41.5686	0.00433586	0.00340747	0.00415829	0.00298811	0.015406	0.0116607	0.0134097	0.00962436	0.0174795	0.0129127	0.0146973	0.0104924		0.149745	0
41.9608	0.00469023	0.00375892	0.00456748	0.0033457	0.016665	0.0128633	0.0147293	0.0107761	0.0189079	0.0142445	0.0161436	0.0117481		0.134664	0
42.3529	0.00506337	0.00413622	0.00500465	0.00373527	0.0179906	0.0141545	0.0161391	0.0120309	0.020412	0.0156742	0.0176888	0.013116		0.113483	0
42.7451	0.00545521	0.00453997	0.00547023	0.00415818	0.0193826	0.0155361	0.0176405	0.013393	0.0219913	0.0172043	0.0193343	0.014601		0.0889504	0
43.1373	0.00586557	0.00497065	0.00596447	0.00461562	0.0208404	0.0170099	0.0192343	0.0148664	0.0236453	0.0188363	0.0210812	0.0162073		0.0645247	0
43.5294	0.00629414	0.00542853	0.00648742	0.0051086	0.0223628	0.0185768	0.0209207	0.0164542	0.0253726	0.0205714	0.0229296	0.0179383		0.0432521	0
43.9216	0.00674046	0.00591373	0.00703895	0.00563792	0.0239482	0.0202372	0.0226993	0.0181591	0.0271713	0.02241	0.0248789	0.019797		0.0268966	0
44.3137	0.00720394	0.00642615	0.00761865	0.00620414	0.0255943	0.0219907	0.0245687	0.0199828	0.029039	0.0243518	0.0269278	0.0217852		0.0157252	0
44.7059	0.00768385	0.00696545	0.00822588	0.00680753	0.0272987	0.0238361	0.0265268	0.0219263	0.0309727	0.0263954	0.029074	0.0239039		0.00890343	0
45.098	0.00817928	0.00753109	0.00885976	0.00744805	0.029058	0.0257717	0.0285709	0.0239893	0.0329688	0.0285388	0.0313144	0.0261531		0.00514964	0
45.4902	0.0086892	0.00812225	0.0095191	0.00812533	0.0308686	0.0277946	0.0306971	0.0261708	0.0350229	0.0307789	0.0336447	0.0285313		0.00326205	0
45.8824	0.00921241	0.00873786	0.0102025	0.00883863	0.032726	0.0299011	0.0329007	0.0284682	0.0371303	0.0331115	0.0360599	0.0310359		0.00236366	0
46.2745	0.00974756	0.00937656	0.0109081	0.00958681	0.0346255	0.0320865	0.0351761	0.030878	0.0392853	0.0355316	0.0385538	0.0336631		0.00191778	0
46.6667	0.0102932	0.0100367	0.0116339	0.0103683	0.0365616	0.0343454	0.0375168	0.0333952	0.0414818	0.038033	0.0411192	0.0364073		0.00163587	0
47.0588	0.0108475	0.0107165	0.0123777	0.0111812	0.0385283	0.0366711	0.0399151	0.0360133	0.0437131	0.0406084	0.0437478	0.0392616		0.00138226	0
47.451	0.0114089	0.0114135	0.0131368	0.012023	0.0405193	0.0390561	0.0423627	0.0387247	0.0459718	0.0432495	0.0464304	0.0422175		0.0011117	0
47.8431	0.0119755	0.0121255	0.0139083	0.0128909	0.0425275	0.041492	0.0448502	0.0415201	0.0482501	0.0459468	0.0491567	0.0452651		0.000830681	0
48.2353	0.012545	0.0128497	0.014689	0.0137816	0.0445456	0.0439692	0.0473674	0.0443889	0.0505395	0.04869	0.0519156	0.0483926		0.000567819	0
48.6275	0.0131155	0.0135829	0.0154756	0.0146914	0.0465656	0.0464775	0.0499033	0.047319	0.0528311	0.0514676	0.054695	0.051587		0.000351291	0
49.0196	0.0136847	0.0143221	0.0162644	0.015616	0.0485795	0.0490057	0.0524462	0.050297	0.0551156	0.0542671	0.0574821	0.0548335		0.000195142	0
49.4118	0.0142502	0.0150637	0.0170515	0.0165509	0.0505787	0.0515418	0.0549836	0.0533082	0.0573833	0.0570755	0.0602631	0.0581163		9.67e-05	0
49.8039	0.0148098	0.0158041	0.0178331	0.0174912	0.0525544	0.0540733	0.0575026	0.0563366	0.0596242	0.0598788	0.0630239	0.0614179		4.25e-05	0
50.1961	0.0153609	0.0165394	0.0186048	0.0184316	0.0544976	0.0565869	0.0599896	0.0593654	0.0618282	0.0626621	0.0657496	0.0647198		1.65e-05	0
50.5882	0.0159011	0.0172657	0.0193625	0.0193666	0.0563992	0.059069	0.0624309	0.0623765	0.0639847	0.0654105	0.0684252	0.0680025		5.57e-06	0
50.9804	0.0164281	0.0179789	0.0201019	0.0202903	0.05825	0.0615052	0.0648123	0.0653513	0.0660835	0.0681082	0.0710352	0.0712456		1.58e-06	0
51.3725	0.0169394	0.0186749	0.0208186	0.0211967	0.0600407	0.0638815	0.0671198	0.0682704	0.0681139	0.0707393	0.0735641	0.074428		3.28e-07	0
51.7647	0.0174327	0.0193495	0.0215082	0.0220799	0.0617624	0.0661832	0.0693391	0.0711142	0.0700657	0.0732879	0.0759963	0.0775283		3.79e-08	0
52.1569	0.0179056	0.0199986	0.0221666	0.0229335	0.0634061	0.0683961	0.0714564	0.0738628	0.0719286	0.0757379	0.0783167	0.0805247		7.51e-10	0
52.549	0.0183561	0.0206182	0.0227896	0.0237515	0.0649629	0.0705057	0.073458	0.0764963	0.0736927	0.0780737	0.0805101	0.0833957		0	0
52.9412	0.0187821	0.0212043	0.0233732	0.0245279	0.0664247	0.0724984	0.0753307	0.0789951	0.0753485	0.0802797	0.0825623	0.0861199		0	0
53.3333	0.0191816	0.0217531	0.0239137	0.0252567	0.0677833	0.0743605	0.077062	0.0813403	0.0768867	0.0823411	0.0844593	0.0886765		0	0
53.7255	0.0195532	0.0222612	0.0244076	0.0259323	0.0690313	0.0760795	0.0786401	0.0835136	0.0782989	0.0842437	0.0861883	0.0910456		0	0
54.1176	0.0198951	0.0227252	0.0248517	0.0265495	0.0701617	0.0776433	0.0800541	0.0854975	0.0795769	0.0859744	0.0877373	0.0932084		0	0
54.5098	0.0202062	0.0231422	0.0252432	0.0271032	0.0711681	0.0790409	0.0812941	0.0872762	0.0807135	0.0875207	0.0890954	0.0951473		0	0
54.902	0.0204856	0.0235097	0.0255796	0.0275892	0.0720448	0.0802622	0.0823513	0.088835	0.0817022	0.0888716	0.0902529	0.0968464		0	0
55.2941	0.0207325	0.0238252	0.0258591	0.0280035	0.0727869	0.0812985	0.0832183	0.0901608	0.082537	0.0900172	0.0912016	0.0982915		0	0
55.6863	0.0209465	0.0240873	0.02608	0.0283427	0.0733902	0.0821424	0.0838888	0.0912426	0.0832133	0.0909493	0.0919347	0.0994704		0	0
56.0784	0.0211275	0.0242944	0.0262415	0.0286043	0.0738515	0.0827875	0.0843581	0.0920712	0.0837271	0.0916609	0.0924469	0.100373		0	0
56.4706	0.0212758	0.0244459	0.026343	0.0287863	0.0741682	0.0832294	0.084623	0.0926395	0.0840753	0.0921469	0.0927345	0.100992		0	0
56.8627	0.0213921	0.0245416	0.0263847	0.0288875	0.0743387	0.0834649	0.0846815	0.0929427	0.084256	0.0924036	0.0927954	0.101322		0	0
57.2549	0.0214774	0.0245816	0.0263673	0.0289075	0.0743625	0.0834925	0.0845336	0.0929783	0.0842682	0.0924292	0.0926292	0.101359		0	0
57.6471	0.021533	0.0245671	0.0262921	0.0288467	0.0742397	0.0833122	0.0841804	0.092746	0.084112	0.0922238	0.0922374	0.101105		0	0
58.0392	0.0215606	0.0244994	0.0261611	0.0287064	0.0739717	0.0829256	0.083625	0.0922481	0.0837886	0.0917889	0.0916229	0.10056		0	0
58.4314	0.0215626	0.0243807	0.0259768	0.0284886	0.0735604	0.0823361	0.0828716	0.0914889	0.0833	0.0911279	0.0907903	0.0997298		0	0
58.8235	0.0215413	0.0242137	0.0257424	0.0281962	0.0730091	0.0815484	0.081926	0.0904751	0.0826493	0.0902461	0.0897458	0.0986217		0	0
59.2157	0.0214997	0.0240016	0.0254617	0.0278329	0.0723215	0.0805689	0.0807956	0.0892157	0.0818408	0.0891501	0.0884971	0.0972451		0	0
59.6078	0.0214412	0.0237485	0.0251393	0.0274033	0.0715024	0.0794052	0.0794889	0.0877215	0.0808793	0.0878483	0.0870534	0.0956117		0	0
60	0.0213693	0.0234588	0.02478	0.0269126	0.0705575	0.0780664	0.0780156	0.0860054	0.0797708	0.0863504	0.0854251	0.0937353		0	0
60.3922	0.0212882	0.0231375	0.0243895	0.0263672	0.0694929	0.0765629	0.0763868	0.084082	0.078522	0.0846675	0.0836238	0.0916315		0	0
60.7843	0.0212023	0.0227903	0.0239741	0.0257737	0.0683158	0.0749061	0.0746142	0.0819672	0.0771405	0.0828121	0.0816623	0.0893178		0	0
61.1765	0.0211161	0.0224233	0.0235405	0.0251398	0.0670338	0.0731085	0.0727106	0.0796786	0.0756345	0.0807974	0.0795542	0.0868127		0	0
61.5686	0.0210347	0.0220431	0.023096	0.0244738	0.065655	0.0711832	0.0706897	0.0772346	0.0740127	0.0786378	0.0773139	0.0841362		0	0
61.9608	0.0209632	0.0216568	0.0226482	0.0237844	0.0641882	0.0691445	0.0685655	0.0746548	0.0722846	0.0763484	0.0749563	0.0813091		0	0
62.3529	0.0209073	0.0212718	0.0222054	0.0230814	0.0626426	0.0670068	0.0663526	0.0719592	0.0704599	0.0739448	0.072497	0.0783528		0	0
62.7451	0.0208724	0.020896	0.0217761	0.0223746	0.0610275	0.0647852	0.0640658	0.0691683	0.0685488	0.0714432	0.0699518	0.0752893		0	0
63.1373	0.0208644	0.0205374	0.0213692	0.0216747	0.0593527	0.0624949	0.0617203	0.0663028	0.0665618	0.0688599	0.0673365	0.0721406		0	0
63.5294	0.0208891	0.0202046	0.020994	0.0209926	0.0576281	0.0601514	0.0593312	0.0633835	0.0645095	0.0662113	0.064667	0.0689285		0	0
63.9216	0.0209525	0.019906	0.0206599	0.02034	0.0558636	0.0577699	0.0569134	0.0604305	0.0624027	0.0635138	0.0619592	0.0656747		0	0
64.3137	0.0210605	0.0196505	0.0203765	0.0197285	0.0540692	0.0553656	0.0544815	0.0574641	0.060252	0.0607835	0.0592283	0.0624002		0	0
64.7059	0.0212189	0.0194468	0.0201535	0.0191703	0.0522548	0.0529534	0.0520501	0.0545034	0.0580681	0.0580363	0.0564895	0.0591252		0	0
65.098	0.0214336	0.0193038	0.0200006	0.0186777	0.0504302	0.0505477	0.0496328	0.051567	0.0558615	0.0552874	0.0537571	0.0558692		0	0
65.4902	0.0217101	0.0192302	0.0199276	0.0182635	0.0486049	0.0481624	0.0472431	0.0486724	0.0536424	0.0525514	0.0510449	0.0526501		0	0
65.8824	0.0220538	0.0192346	0.0199439	0.0179401	0.046788	0.0458106	0.0448934	0.0458361	0.0514209	0.0498422	0.048366	0.0494852		0	0
66.2745	0.0224696	0.0193253	0.0200588	0.0177203	0.0449884	0.0435048	0.0425956	0.0430735	0.0492064	0.0471728	0.0457323	0.0463899		0	0
66.6667	0.0229624	0.0195104	0.0202811	0.0176166	0.0432146	0.0412565	0.0403606	0.0403984	0.047008	0.0445554	0.0431553	0.0433784		0	0
67.0588	0.0235362	0.0197976	0.0206193	0.0176415	0.0414745	0.0390765	0.0381984	0.0378235	0.0448345	0.0420011	0.0406451	0.0404635		0	0
67.451	0.0241949	0.020194	0.0210812	0.0178069	0.0397754	0.0369743	0.036118	0.03536	0.0426938	0.0395199	0.0382109	0.0376561		0	0
67.8431	0.0249417	0.020706	0.021674	0.0181246	0.0381242	0.0349586	0.0341275	0.0330178	0.0405934	0.0371207	0.0358608	0.0349659		0	0
68.2353	0.0257791	0.0213396	0.0224041	0.0186053	0.0365271	0.0330371	0.0322339	0.0308051	0.0385403	0.0348116	0.033602	0.0324009		0	0
68.6275	0.0267091	0.0220999	0.0232766	0.0192592	0.0349896	0.0312162	0.030443	0.0287288	0.0365406	0.0325991	0.0314404	0.0299675		0	0
69.0196	0.0277329	0.0229909	0.024296	0.0200956	0.0335165	0.0295013	0.0287597	0.0267943	0.0345998	0.030489	0.0293809	0.0276706		0	0
69.4118	0.0288507	0.0240159	0.0254653	0.0211223	0.0321121	0.0278969	0.0271877	0.0250057	0.032723	0.0284856	0.0274274	0.0255137		0	0
69.8039	0.0300622	0.0251771	0.0267863	0.0223459	0.0307798	0.026406	0.0257297	0.0233655	0.0309142	0.0265924	0.0255827	0.0234989		0	0
70.1961	0.0313662	0.0264753	0.0282592	0.0237712	0.0295223	0.0250309	0.0243874	0.0218749	0.0291769	0.0248117	0.0238485	0.0216269		0	0
70.5882	0.0327603	0.0279102	0.0298829	0.0254014	0.0283417	0.0237726	0.0231613	0.020534	0.0275141	0.0231449	0.0222258	0.0198973		0	0
70.9804	0.0342415	0.0294804	0.0316545	0.0272376	0.0272394	0.0226313	0.0220511	0.0193414	0.0259279	0.0215923	0.0207144	0.0183086		0	0
71.3725	0.0358056	0.0311827	0.0335694	0.0292783	0.026216	0.0216062	0.0210553	0.0182947	0.0244198	0.0201534	0.0193135	0.016858		0	0
71.7647	0.0374478	0.0330127	0.0356212	0.03152	0.0252715	0.0206954	0.0201717	0.0173903	0.0229908	0.0188268	0.0180214	0.015542		0	0
72.1569	0.039162	0.0349646	0.0378018	0.0339562	0.0244051	0.0198962	0.0193971	0.0166234	0.0216411	0.0176103	0.0168355	0.0143561		0	0
72.549	0.0409413	0.037031	0.0401012	0.0365779	0.0236158	0.0192053	0.0187276	0.0159885	0.0203706	0.0165011	0.0157528	0.0132952		0	0
72.9412	0.0427781	0.0392029	0.0425075	0.0393732	0.0229015	0.0186183	0.0181586	0.015479	0.0191785	0.0154956	0.0147696	0.0123535		0	0
73.3333	0.0446636	0.0414701	0.045007	0.042327	0.0222599	0.0181304	0.0176845	0.0150876	0.0180636	0.0145897	0.0138817	0.0115245		0	0
73.7255	0.0465884	0.0438207	0.0475845	0.0454216	0.0216881	0.017736	0.0172995	0.0148061	0.0170241	0.0137789	0.0130844	0.0108013		0	0
74.1176	0.0485423	0.0462414	0.050223	0.0486362	0.0211828	0.017429	0.016997	0.0146257	0.0160582	0.0130582	0.0123725	0.0101768		0	0
74.5098	0.0505145	0.0487178	0.0529041	0.0519473	0.0207401	0.017203	0.01677	0.0145371	0.0151632	0.0124222	0.0117408	0.0096435		0	0
74.902	0.0524933	0.0512341	0.0556078	0.0553288	0.020356	0.0170508	0.0166111	0.0145304	0.0143365	0.0118653	0.0111835	0.0091936		0	0
75.2941	0.0544669	0.0537734	0.0583132	0.0587522	0.020026	0.0169653	0.0165128	0.0145954	0.013575	0.0113816	0.0106949	0.00881932		0	0
75.6863	0.0564228	0.0563181	0.0609986	0.0621868	0.0197454	0.0169389	0.016467	0.0147216	0.0128755	0.0109651	0.010269	0.00851277		0	0
76.0784	0.0583483	0.0588496	0.0636412	0.0656003	0.0195094	0.0169638	0.0164658	0.0148983	0.0122346	0.0106097	0.00989991	0.00826612		0	0
76.4706	0.0602305	0.0613486	0.0662181	0.0689592	0.0193129	0.0170322	0.0165012	0.0151149	0.0116487	0.0103094	0.00958154	0.00807162		0	0
76.8627	0.0620565	0.0637957	0.0687061	0.0722288	0.0191507	0.0171363	0.0165651	0.0153605	0.0111141	0.0100581	0.00930801	0.0079217		0	0
77.2549	0.0638134	0.0661712	0.0710822	0.0753745	0.0190177	0.0172682	0.0166496	0.0156248	0.0106272	0.00984969	0.00907352	0.00780901		0	0
77.6471	0.0654885	0.0684553	0.073324	0.0783615	0.0189088	0.0174203	0.0167469	0.0158973	0.0101841	0.00967837	0.00887244	0.00772649		0	0
78.0392	0.0670694	0.0706287	0.0754096	0.0811562	0.0188188	0.0175851	0.0168498	0.0161683	0.00978118	0.00953843	0.00869934	0.0076674		0	0
78.4314	0.0685442	0.0726724	0.0773184	0.0837259	0.0187428	0.0177553	0.0169511	0.0164285	0.00941467	0.0094244	0.00854904	0.00762541		0	0
78.8235	0.0699016	0.0745684	0.0790309	0.0860402	0.0186759	0.017924	0.0170441	0.0166689	0.00908097	0.00933105	0.00841665	0.00759462		0	0
79.2157	0.0711311	0.0762995	0.0805297	0.0880709	0.0186135	0.0180846	0.0171227	0.0168817	0.00877656	0.00925344	0.00829759	0.00756957		0	0
79.6078	0.0722227	0.0778498	0.0817988	0.0897928	0.0185511	0.0182311	0.0171812	0.0170595	0.00849804	0.00918695	0.00818766	0.00754534		0	0
80	0.0731676	0.0792047	0.0828247	0.0911843	0.0184847	0.0183577	0.0172147	0.0171958	0.00824218	0.00912728	0.00808298	0.00751751		0	0
80.3922	0.0739579	0.0803513	0.0835963	0.0922276	0.0184103	0.0184595	0.0172186	0.0172853	0.00800589	0.00907051	0.00798008	0.00748222		0	0
80.7843	0.0745869	0.0812787	0.0841047	0.0929089	0.0183246	0.0185318	0.0171893	0.0173233	0.00778626	0.00901308	0.0078759	0.00743615		0	0
81.1765	0.0750492	0.0819775	0.0843439	0.093219	0.0182243	0.0185706	0.0171236	0.0173065	0.00758059	0.00895183	0.00776776	0.00737655		0	0
81.5686	0.0753402	0.0824407	0.0843107	0.0931534	0.0181066	0.0185727	0.0170191	0.0172323	0.00738639	0.00888397	0.00765338	0.00730126		0	0
81.9608	0.0754571	0.0826634	0.0840045	0.092712	0.0179692	0.0185353	0.0168742	0.0170994	0.00720137	0.00880712	0.00753091	0.00720862		0	0
82.3529	0.0753982	0.0826429	0.0834275	0.0918997	0.0178101	0.0184564	0.0166878	0.0169072	0.00702345	0.00871929	0.00739888	0.00709754		0	0
82.7451	0.075163	0.0823787	0.0825848	0.0907257	0.0176276	0.0183344	0.0164596	0.0166563	0.00685077	0.00861886	0.00725618	0.00696743		0	0
83.1373	0.0747526	0.0818726	0.081484	0.0892038	0.0174204	0.0181685	0.0161898	0.0163483	0.00668172	0.00850462	0.0071021	0.00681818		0	0
83.5294	0.0741693	0.0811287	0.0801353	0.0873516	0.0171879	0.0179586	0.0158795	0.0159854	0.00651486	0.00837568	0.00693626	0.00665013		0	0
83.9216	0.0734167	0.0801531	0.0785511	0.0851907	0.0169294	0.0177049	0.01553	0.0155708	0.006349	0.00823153	0.00675859	0.00646401		0	0
84.3137	0.0724996	0.0789541	0.0767462	0.0827458	0.016645	0.0174084	0.0151433	0.0151084	0.00618312	0.00807199	0.00656931	0.00626093		0	0
84.7059	0.0714239	0.0775418	0.074737	0.0800445	0.016335	0.0170706	0.0147219	0.0146026	0.00601642	0.00789714	0.00636894	0.00604228		0	0
85.098	0.0701969	0.0759282	0.0725417	0.0771167	0.0159998	0.0166933	0.0142687	0.0140583	0.00584827	0.0077074	0.0061582	0.00580974		0	0
85.4902	0.0688266	0.0741266	0.0701797	0.0739938	0.0156404	0.0162789	0.0137869	0.0134808	0.00567823	0.00750339	0.00593801	0.00556518		0	0
85.8824	0.067322	0.0721522	0.0676717	0.0707085	0.015258	0.01583	0.0132798	0.0128756	0.00550601	0.00728598	0.00570949	0.00531062		0	0
86.2745	0.065693	0.070021	0.0650389	0.0672943	0.014854	0.0153498	0.0127513	0.0122486	0.00533148	0.00705624	0.00547386	0.0050482		0	0
86.6667	0.0639502	0.0677499	0.062303	0.0637843	0.0144301	0.0148416	0.0122052	0.0116055	0.00515463	0.00681538	0.00523246	0.00478011		0	0
87.0588	0.0621045	0.0653569	0.059486	0.0602113	0.0139881	0.0143088	0.0116453	0.010952	0.00497557	0.00656477	0.00498671	0.00450853		0	0
87.451	0.0601676	0.0628602	0.0566095	0.0566071	0.0135301	0.0137551	0.0110755	0.0102938	0.00479454	0.00630587	0.00473804	0.00423562		0	0
87.8431	0.0581514	0.0602783	0.0536949	0.0530019	0.0130581	0.0131843	0.0104999	0.00963607	0.00461185	0.00604021	0.00448793	0.00396347		0	0
88.2353	0.0560679	0.0576297	0.0507627	0.0494244	0.0125745	0.0126003	0.00992207	0.00898397	0.00442789	0.00576937	0.00423781	0.00369404		0	0
88.6275	0.0539293	0.054933	0.0478326	0.0459006	0.0120815	0.0120068	0.00934576	0.00834214	0.0042431	0.00549496	0.0039891	0.00342918		0	0
89.0196	0.0517476	0.0522059	0.0449233	0.0424545	0.0115814	0.0114076	0.00877439	0.0077148	0.004058	0.00521856	0.00374313	0.00317056		0	0
89.4118	0.0495349	0.0494659	0.042052	0.0391073	0.0110766	0.0108064	0.0082112	0.00710572	0.00387311	0.00494174	0.00350118	0.00291966		0	0
89.8039	0.0473029	0.0467296	0.0392347	0.0358772	0.0105694	0.0102066	0.00765915	0.00651819	0.003689	0.00466601	0.00326442	0.0026778		0	0
90.1961	0.0450628	0.0440128	0.0364855	0.0327799	0.0100621	0.00961148	0.00712092	0.00595498	0.00350623	0.00439282	0.00303392	0.00244606		0	0
90.5882	0.0428255	0.0413299	0.0338172	0.029828	0.00955683	0.00902426	0.0065989	0.00541834	0.00332538	0.00412351	0.00281061	0.00222536		0	0
90.9804	0.0406014	0.0386945	0.0312408	0.0270314	0.00905572	0.00844776	0.00609515	0.00491003	0.003147	0.00385934	0.00259534	0.00201638		0	0
91.3725	0.0384002	0.0361189	0.0287656	0.0243972	0.00856076	0.00788458	0.00561143	0.00443133	0.00297163	0.00360145	0.0023888	0.00181963		0	0
91.7647	0.0362309	0.0336138	0.0263992	0.02193	0.0080738	0.00733705	0.00514918	0.00398303	0.00279979	0.00335088	0.00219156	0.00163542		0	0
92.1569	0.0341018	0.031189	0.0241477	0.0196321	0.00759657	0.00680722	0.00470951	0.00356553	0.00263196	0.00310852	0.00200407	0.0014639		0	0
92.549	0.0320206	0.0288525	0.0220155	0.0175033	0.00713065	0.00629683	0.00429326	0.00317881	0.00246859	0.00287515	0.00182665	0.00130505		0	0
92.9412	0.029994	0.0266112	0.0200054	0.0155418	0.00667742	0.00580734	0.00390094	0.0028225	0.00231007	0.00265141	0.0016595	0.00115871		0	0
93.3333	0.028028	0.0244706	0.0181189	0.013744	0.00623815	0.00533993	0.00353284	0.00249593	0.00215676	0.00243781	0.00150272	0.0010246		0	0
93.7255	0.0261278	0.0224349	0.0163563	0.0121045	0.00581391	0.00489549	0.00318895	0.00219817	0.00200898	0.00223476	0.0013563	0.000902335		0	0
94.1176	0.0242977	0.020507	0.0147165	0.0106173	0.0054056	0.00447464	0.00286908	0.00192805	0.00186698	0.00204253	0.00122015	0.000791426		0	0
94.5098	0.0225414	0.0186888	0.0131974	0.00927479	0.00501398	0.00407776	0.00257281	0.00168423	0.00173097	0.00186127	0.00109406	0.000691328		0	0
94.902	0.0208617	0.0169807	0.0117962	0.00806906	0.00463961	0.00370498	0.00229954	0.00146526	0.00160111	0.00169105	0.000977785	0.000601433		0	0
95.2941	0.0192606	0.0153827	0.0105089	0.00699149	0.00428294	0.00335622	0.00204853	0.00126957	0.00147752	0.00153181	0.000871001	0.000521098		0	0
95.6863	0.0177395	0.0138933	0.00933134	0.00603314	0.00394421	0.00303121	0.00181892	0.00109554	0.00136025	0.00138343	0.000773332	0.000449657		0	0
96.0784	0.0162992	0.0125107	0.00825839	0.00518495	0.00362357	0.00272949	0.00160973	0.000941508	0.00124933	0.00124569	0.000684359	0.000386432		0	0
96.4706	0.0149398	0.0112319	0.00728473	0.00443785	0.00332102	0.00245045	0.00141991	0.000805841	0.00114475	0.00111832	0.000603633	0.000330744		0	0
96.8627	0.0136607	0.0100536	0.00640468	0.00378293	0.00303643	0.00219337	0.00124835	0.000686914	0.00104642	0.00100097	0.000530678	0.00028193		0	0
97.2549	0.0124611	0.00897209	0.0056124	0.00321153	0.00276956	0.00195739	0.0010939	0.000583154	0.000954273	0.000893261	0.000465007	0.000239341		0	0
97.6471	0.0113394	0.00798293	0.00490192	0.00271533	0.00252008	0.00174157	0.000955404	0.000493051	0.000868166	0.00079476	0.000406122	0.000202359		0	0
98.0392	0.0102938	0.00708158	0.00426727	0.00228645	0.00228757	0.00154492	0.000831696	0.000415172	0.000787945	0.000705009	0.000353528	0.000170394		0	0
98.4314	0.00932209	0.00626321	0.00370254	0.00191746	0.00207151	0.00136637	0.000721621	0.00034817	0.000713431	0.000623523	0.000306731	0.000142895		0	0
98.8235	0.00842176	0.00552284	0.00320197	0.00160147	0.00187136	0.00120485	0.000624052	0.000290792	0.000644419	0.000549808	0.000265253	0.000119345		0	0
99.2157	0.00759006	0.00485542	0.00275994	0.00133211	0.00168647	0.00105924	0.000537897	0.000241881	0.000580691	0.000483359	0.000228629	9.92708e-05		0	0
99.6078	0.006824	0.00425589	0.0023711	0.00110354	0.0015162	0.000928442	0.000462109	0.000200377	0.000522012	0.00042367	0.000196413	8.22368e-05		0	0
100	0.00612047	0.00371922	0.00203032	0.000910461	0.00135984	0.000811363	0.000395692	0.000165319	0.000468139	0.000370241	0.000168181	6.78482e-05		0	0
	0.00547625	0.00324051	0.0017328	0.000748107	0.00121667	0.000706927	0.000337704	0.000135839	0.000418819	0.000322583	0.000143533	5.57492e-05
	0.00488802	0.00281497	0.001474	0.0006122	0.00108595	0.000614091	0.000287265	0.000111161	0.000373796	0.000280219	0.000122094	4.56211e-05
	0.00435246	0.00243799	0.00124972	0.000498942	0.000966943	0.000531851	0.000243554	9.0596e-05	0.000332813	0.000242691	0.000103515	3.7181e-05
	0.00386624	0.00210518	0.00105607	0.000404981	0.000858905	0.000459248	0.000205814	7.35348e-05	0.000295611	0.00020956	8.74737e-05	3.01789e-05
	0.00342606	0.00181237	0.000889492	0.000327376	0.000761101	0.000395369	0.000173349	5.94434e-05	0.000261937	0.000180411	7.3675e-05	2.43958e-05
	0.00302867	0.00155561	0.000746718	0.000263564	0.00067281	0.000339357	0.000145524	4.78567e-05	0.000231541	0.000154852	6.18487e-05	1.96405e-05
	0.00267093	0.00133124	0.000624795	0.000211325	0.000593329	0.000290409	0.000121762	3.83715e-05	0.00020418	0.000132516	5.17496e-05	1.57477e-05
	0.00234976	0.00113582	0.000521057	0.000168751	0.000521976	0.000247778	0.000101545	3.06409e-05	0.00017962	0.000113063	4.3157e-05	1.25751e-05
	0.00206223	0.000966185	0.000433111	0.000134204	0.000458098	0.000210773	8.44058e-05	2.43682e-05	0.000157634	9.61768e-05	3.58725e-05	1.00007e-05
	0.00180552	0.000819428	0.000358822	0.000106296	0.000401069	0.000178758	6.9928e-05	1.93006e-05	0.000138006	8.1568e-05	2.97193e-05	7.92097e-06
	0.00157696	0.000692884	0.000296296	8.38476e-05	0.000350294	0.000151152	5.77427e-05	1.52246e-05	0.000120531	6.89713e-05	2.45405e-05	6.24818e-06
	0.00137401	0.000584129	0.000243859	6.5871e-05	0.000305209	0.000127427	4.75236e-05	1.19605e-05	0.000105016	5.81455e-05	2.01973e-05	4.90858e-06
	0.00119429	0.000490971	0.000200041	5.15376e-05	0.000265286	0.000107105	3.89841e-05	9.35793e-06	9.12776e-05	4.88723e-05	1.6568e-05	3.84049e-06
	0.00103558	0.000411436	0.000163555	4.0159e-05	0.00023003	8.97541e-05	3.18737e-05	7.29185e-06	7.91455e-05	4.09551e-05	1.35461e-05	2.99256e-06
	0.000895793	0.000343754	0.000133283	3.1165e-05	0.000198979	7.49892e-05	2.59743e-05	5.65878e-06	6.84607e-05	3.42178e-05	1.10389e-05	2.32235e-06
	0.000773009	0.000286346	0.000108257	2.40869e-05	0.000171704	6.24658e-05	2.10971e-05	4.37356e-06	5.90758e-05	2.85033e-05	8.96608e-06	1.7949e-06
	0.000665447	0.000237812	8.76395e-05	1.85404e-05	0.000147811	5.18782e-05	1.70792e-05	3.36647e-06	5.08546e-05	2.36721e-05	7.25849e-06	1.38159e-06
	0.000571471	0.000196913	7.0715e-05	1.42131e-05	0.000126936	4.29562e-05	1.37809e-05	2.58073e-06	4.36721e-05	1.9601e-05	5.85675e-06	1.05913e-06
	0.000489583	0.000162561	5.68708e-05	1.08513e-05	0.000108747	3.54623e-05	1.1083e-05	1.97032e-06	3.74136e-05	1.61815e-05	4.71013e-06	8.08615e-07
	0.000418418	0.000133799	4.55862e-05	8.25095e-06	9.29393e-05	2.91881e-05	8.88381e-06	1.49816e-06	3.19749e-05	1.33186e-05	3.77552e-06	6.14842e-07
	0.000356736	0.000109798	3.64204e-05	6.24818e-06	7.92381e-05	2.39521e-05	7.09757e-06	1.13451e-06	2.72609e-05	1.09294e-05	3.01638e-06	4.656e-07
	0.000303414	8.98316e-05	2.90016e-05	4.71227e-06	6.7394e-05	1.95966e-05	5.6518e-06	8.55627e-07	2.31859e-05	8.94194e-06	2.40194e-06	3.51147e-07
	0.00025744	7.32765e-05	2.30178e-05	3.53944e-06	5.71821e-05	1.59851e-05	4.4857e-06	6.42671e-07	1.96725e-05	7.29403e-06	1.90636e-06	2.6375e-07
	0.000217905	5.95936e-05	1.82085e-05	2.64768e-06	4.84006e-05	1.30002e-05	3.54846e-06	4.80751e-07	1.66513e-05	5.93201e-06	1.50805e-06	1.97299e-07
	0.000183997	4.83207e-05	1.43566e-05	1.97253e-06	4.08689e-05	1.0541e-05	2.79779e-06	3.58161e-07	1.40601e-05	4.80989e-06	1.18902e-06	1.46988e-07
	0.000154991	3.90629e-05	1.12822e-05	1.46356e-06	3.44261e-05	8.52149e-06	2.19866e-06	2.65745e-07	1.18435e-05	3.88836e-06	9.34399e-07	1.09061e-07
	0.000130243	3.14844e-05	8.83696e-06	1.08149e-06	2.89291e-05	6.86826e-06	1.72213e-06	1.96371e-07	9.95233e-06	3.13399e-06	7.31882e-07	8.05902e-08
	0.000109183	2.53003e-05	6.89887e-06	7.95912e-07	2.42512e-05	5.5192e-06	1.34444e-06	1.44517e-07	8.34299e-06	2.51842e-06	5.71368e-07	5.93093e-08
	9.13072e-05	2.027e-05	5.36809e-06	5.83355e-07	2.02808e-05	4.42186e-06	1.04613e-06	1.05922e-07	6.97704e-06	2.0177e-06	4.44588e-07	4.34702e-08
	7.61742e-05	1.61913e-05	4.16321e-06	4.25823e-07	1.69195e-05	3.5321e-06	8.1132e-07	7.73184e-08	5.82066e-06	1.6117e-06	3.44799e-07	3.17312e-08
	6.33962e-05	1.28946e-05	3.21813e-06	3.09565e-07	1.40813e-05	2.81293e-06	6.27143e-07	5.6209e-08	4.84424e-06	1.28354e-06	2.66526e-07	2.3068e-08
	5.26344e-05	1.02384e-05	2.47939e-06	2.24131e-07	1.16909e-05	2.23349e-06	4.83179e-07	4.06964e-08	4.0219e-06	1.01914e-06	2.05344e-07	1.67017e-08
	4.35942e-05	8.10509e-06	1.90393e-06	1.61614e-07	9.68292e-06	1.76811e-06	3.71035e-07	2.9345e-08	3.3311e-06	8.06788e-07	1.57684e-07	1.20431e-08
	3.60197e-05	6.39707e-06	1.45722e-06	1.16061e-07	8.00049e-06	1.3955e-06	2.83981e-07	2.10736e-08	2.75231e-06	6.3677e-07	1.20687e-07	8.64853e-09
	2.96895e-05	5.03388e-06	1.11165e-06	8.30074e-08	6.59445e-06	1.09813e-06	2.16635e-07	1.5072e-08	2.2686e-06	5.01077e-07	9.20666e-08	6.1855e-09
	2.44127e-05	3.94933e-06	8.45226e-07	5.91257e-08	5.42242e-06	8.61536e-07	1.64716e-07	1.07357e-08	1.8654e-06	3.9312e-07	7.00017e-08	4.4059e-09
	2.00255e-05	3.08918e-06	6.4054e-07	4.19434e-08	4.44794e-06	6.73896e-07	1.24827e-07	7.61583e-09	1.53016e-06	3.07499e-07	5.30495e-08	3.12551e-09
	1.63871e-05	2.40914e-06	4.83822e-07	2.96332e-08	3.6398e-06	5.25547e-07	9.42863e-08	5.38061e-09	1.25215e-06	2.39807e-07	4.00701e-08	2.20819e-09
	1.33774e-05	1.87318e-06	3.64243e-07	2.08507e-08	2.9713e-06	4.08628e-07	7.0983e-08	3.78594e-09	1.02217e-06	1.86457e-07	3.01666e-08	1.55374e-09
	1.08941e-05	1.45209e-06	2.73315e-07	1.46113e-08	2.41974e-06	3.1677e-07	5.32631e-08	2.65303e-09	8.32425e-07	1.44542e-07	2.2636e-08	1.0888e-09
	8.85049e-06	1.1223e-06	2.0441e-07	1.01973e-08	1.96581e-06	2.44827e-07	3.98351e-08	1.85157e-09	6.76267e-07	1.11715e-07	1.69292e-08	7.59876e-10
	7.17287e-06	8.64815e-07	1.52373e-07	7.08776e-09	1.59319e-06	1.88657e-07	2.96941e-08	1.28695e-09	5.4808e-07	8.60843e-08	1.26195e-08	5.28161e-10
	5.79923e-06	6.64409e-07	1.13209e-07	4.90637e-09	1.28809e-06	1.44939e-07	2.20619e-08	8.9087e-10	4.43119e-07	6.61358e-08	9.37592e-09	3.6561e-10
	4.67735e-06	5.08917e-07	8.38334e-08	3.38251e-09	1.0389e-06	1.11019e-07	1.63373e-08	6.14176e-10	3.57396e-07	5.0658e-08	6.94307e-09	2.52056e-10
	3.76341e-06	3.88649e-07	6.18759e-08	2.32244e-09	8.35903e-07	8.47827e-08	1.20583e-08	4.21695e-10	2.87561e-07	3.86864e-08	5.12455e-09	1.73062e-10
	3.02075e-06	2.95914e-07	4.5519e-08	1.5881e-09	6.70948e-07	6.4553e-08	8.87064e-09	2.88358e-10	2.30815e-07	2.94556e-08	3.76987e-09	1.18341e-10
	2.4188e-06	2.24633e-07	3.33756e-08	1.08153e-09	5.37247e-07	4.90032e-08	6.50418e-09	1.96378e-10	1.8482e-07	2.23602e-08	2.76416e-09	8.05927e-11
	1.93213e-06	1.70012e-07	2.43912e-08	7.33545e-10	4.29152e-07	3.70878e-08	4.75331e-09	1.33193e-10	1.47633e-07	1.69232e-08	2.02007e-09	5.46618e-11
	1.53966e-06	1.28288e-07	1.77665e-08	4.95498e-10	3.41979e-07	2.79857e-08	3.46231e-09	8.99696e-11	1.17645e-07	1.27699e-08	1.47142e-09	3.69232e-11
	1.22396e-06	9.65141e-08	1.28985e-08	3.33338e-10	2.71857e-07	2.10543e-08	2.51363e-09	6.05255e-11	9.3522e-08	9.60709e-09	1.06825e-09	2.48394e-11
	9.70641e-07	7.23926e-08	9.33345e-09	2.23334e-10	2.15592e-07	1.57923e-08	1.81888e-09	4.05516e-11	7.41662e-08	7.20601e-09	7.72994e-10	1.66422e-11
	7.67897e-07	5.41373e-08	6.73149e-09	1.49023e-10	1.7056e-07	1.18099e-08	1.31182e-09	2.70586e-11	5.86746e-08	5.38886e-09	5.57501e-10	1.11048e-11
	6.06037e-07	4.03643e-08	4.8389e-09	9.90322e-11	1.34609e-07	8.80537e-09	9.42995e-10	1.79817e-11	4.6307e-08	4.01789e-09	4.00757e-10	7.37962e-12
	4.77142e-07	3.00052e-08	3.46696e-09	6.55434e-11	1.05979e-07	6.54557e-09	6.75634e-10	1.1901e-11	3.64581e-08	2.98674e-09	2.87133e-10	4.88412e-12
	3.74755e-07	2.2238e-08	2.47581e-09	4.32024e-11	8.3238e-08	4.85116e-09	4.82481e-10	7.84444e-12	2.86348e-08	2.21359e-09	2.05046e-10	3.21933e-12
	2.9363e-07	1.64321e-08	1.76219e-09	2.83606e-11	6.52189e-08	3.58462e-09	3.43411e-10	5.14954e-12	2.2436e-08	1.63566e-09	1.45944e-10	2.11335e-12
	2.29511e-07	1.21057e-08	1.25012e-09	1.85417e-11	5.09774e-08	2.64083e-09	2.43622e-10	3.36669e-12	1.75368e-08	1.20501e-09	1.03535e-10	1.38168e-12
	1.78961e-07	8.8917e-09	8.83936e-10	1.20729e-11	3.97496e-08	1.9397e-09	1.7226e-10	2.19212e-12	1.36743e-08	8.85086e-10	7.32074e-11	8.99638e-13
	1.39209e-07	6.51147e-09	6.22952e-10	7.82888e-12	3.09201e-08	1.42046e-09	1.214e-10	1.42152e-12	1.06368e-08	6.48156e-10	5.15928e-11	5.83387e-13
	1.08026e-07	4.75414e-09	4.37578e-10	5.0561e-12	2.39939e-08	1.0371e-09	8.52742e-11	9.18056e-13	8.25415e-09	4.7323e-10	3.62401e-11	3.76767e-13
	8.36253e-08	3.4607e-09	3.06353e-10	3.25206e-12	1.85742e-08	7.54942e-10	5.97014e-11	5.9049e-13	6.38974e-09	3.4448e-10	2.53721e-11	2.42335e-13
	6.45804e-08	2.51162e-09	2.13774e-10	2.0832e-12	1.43441e-08	5.47903e-10	4.16599e-11	3.78254e-13	4.93454e-09	2.50009e-10	1.77047e-11	1.55234e-13
	4.97526e-08	1.81737e-09	1.48681e-10	1.32901e-12	1.10507e-08	3.96455e-10	2.89746e-11	2.41314e-13	3.80156e-09	1.80902e-10	1.23137e-11	9.90343e-14
	3.82369e-08	1.31109e-09	1.03067e-10	8.44411e-13	8.49291e-09	2.8601e-10	2.00855e-11	1.53323e-13	2.92165e-09	1.30507e-10	8.536e-12	6.29233e-14
	2.93158e-08	9.43015e-10	7.1212e-11	5.34327e-13	6.51141e-09	2.05716e-10	1.38776e-11	9.70199e-14	2.24e-09	9.38684e-11	5.89776e-12	3.98166e-14
	2.24219e-08	6.76246e-10	4.90402e-11	3.36734e-13	4.98019e-09	1.47521e-10	9.55684e-12	6.11422e-14	1.71324e-09	6.7314e-11	4.06149e-12	2.50925e-14
	1.71078e-08	4.83492e-10	3.36602e-11	2.11346e-13	3.79987e-09	1.05473e-10	6.55964e-12	3.8375e-14	1.3072e-09	4.81272e-11	2.78773e-12	1.5749e-14
	1.30218e-08	3.44646e-10	2.30276e-11	1.32108e-13	2.8923e-09	7.51836e-11	4.48757e-12	2.39874e-14	9.94981e-10	3.43063e-11	1.90714e-12	9.84435e-15
	9.88772e-09	2.44938e-10	1.57017e-11	8.22418e-14	2.19619e-09	5.34325e-11	3.05991e-12	1.4933e-14	7.55512e-10	2.43813e-11	1.30041e-12	6.12844e-15
	7.48987e-09	1.73555e-10	1.06712e-11	5.09897e-14	1.66359e-09	3.78605e-11	2.07957e-12	9.2584e-15	5.72294e-10	1.72758e-11	8.83782e-13	3.79961e-15
	5.65984e-09	1.22607e-10	7.2284e-12	3.14847e-14	1.25712e-09	2.67465e-11	1.40865e-12	5.7168e-15	4.32464e-10	1.22044e-11	5.98654e-13	2.34615e-15
	4.26664e-09	8.63567e-11	4.88022e-12	1.93617e-14	9.47676e-10	1.88385e-11	9.51047e-13	3.51558e-15	3.2601e-10	8.59601e-12	4.04178e-13	1.44278e-15
	3.20863e-09	6.0642e-11	3.284e-12	1.18581e-14	7.12678e-10	1.32289e-11	6.39979e-13	2.15313e-15	2.45169e-10	6.03635e-12	2.7198e-13	8.83635e-16
	2.40717e-09	4.24571e-11	2.20259e-12	7.23294e-15	5.34662e-10	9.26191e-12	4.29235e-13	1.31331e-15	1.83929e-10	4.22621e-12	1.82418e-13	5.38979e-16
	1.80154e-09	2.96364e-11	1.47241e-12	4.39381e-15	4.00144e-10	6.46511e-12	2.86941e-13	7.97802e-16	1.37654e-10	2.95003e-12	1.21945e-13	3.27415e-16
	1.34503e-09	2.06253e-11	9.81052e-13	2.65825e-15	2.98749e-10	4.49936e-12	1.91185e-13	4.82668e-16	1.02773e-10	2.05306e-12	8.12505e-14	1.98085e-16
	1.00178e-09	1.43111e-11	6.51511e-13	1.60168e-15	2.22509e-10	3.12193e-12	1.26965e-13	2.90824e-16	7.65454e-11	1.42454e-12	5.39579e-14	1.19353e-16
	7.44334e-10	9.90023e-12	4.31238e-13	9.61136e-16	1.65326e-10	2.15971e-12	8.40387e-14	1.74517e-16	5.68738e-11	9.85477e-13	3.5715e-14	7.16213e-17
	5.51712e-10	6.82836e-12	2.84498e-13	5.74409e-16	1.22542e-10	1.48959e-12	5.54423e-14	1.04298e-16	4.21558e-11	6.797e-13	2.3562e-14	4.28034e-17
	4.07953e-10	4.69555e-12	1.87071e-13	3.41888e-16	9.06114e-11	1.02432e-12	3.64561e-14	6.2078e-17	3.11713e-11	4.67398e-13	1.54932e-14	2.54766e-17
	3.00925e-10	3.21925e-12	1.22603e-13	2.02663e-16	6.68393e-11	7.02271e-13	2.38927e-14	3.67984e-17	2.29934e-11	3.20446e-13	1.0154e-14	1.51019e-17
	2.21442e-10	2.2005e-12	8.00873e-14	1.19645e-16	4.9185e-11	4.80034e-13	1.56072e-14	2.17243e-17	1.69201e-11	2.1904e-13	6.6328e-15	8.91559e-18
	1.62559e-10	1.49964e-12	5.21424e-14	7.03458e-17	3.61065e-11	3.27144e-13	1.01614e-14	1.2773e-17	1.2421e-11	1.49276e-13	4.31842e-15	5.24198e-18
	1.19046e-10	1.01895e-12	3.38365e-14	4.11918e-17	2.64417e-11	2.22282e-13	6.59398e-15	7.47937e-18	9.09622e-12	1.01427e-13	2.80233e-15	3.0695e-18
	8.69706e-11	6.90267e-13	2.1885e-14	2.40221e-17	1.93173e-11	1.5058e-13	4.26489e-15	4.36179e-18	6.64534e-12	6.87097e-14	1.81251e-15	1.79006e-18
	6.33842e-11	4.66208e-13	1.41082e-14	1.39521e-17	1.40784e-11	1.01702e-13	2.74938e-15	2.53333e-18	4.84312e-12	4.64067e-14	1.16844e-15	1.03967e-18
	4.6083e-11	3.13936e-13	9.06496e-15	8.07037e-18	1.02356e-11	6.84844e-14	1.76656e-15	1.46537e-18	3.52116e-12	3.12495e-14	7.50757e-16	6.01382e-19
	3.34236e-11	2.10767e-13	5.80531e-15	4.64917e-18	7.4238e-12	4.59782e-14	1.13133e-15	8.44169e-19	2.55386e-12	2.09799e-14	4.80794e-16	3.46444e-19
	2.41834e-11	1.41079e-13	3.70554e-15	2.66738e-18	5.37143e-12	3.0776e-14	7.22128e-16	4.84327e-19	1.84783e-12	1.40431e-14	3.06892e-16	1.98766e-19
	1.74555e-11	9.41499e-14	2.35746e-15	1.52413e-18	3.87709e-12	2.05385e-14	4.59416e-16	2.76742e-19	1.33376e-12	9.37175e-15	1.95244e-16	1.13574e-19
	1.2569e-11	6.26436e-14	1.49487e-15	8.67333e-19	2.79173e-12	1.36655e-14	2.91317e-16	1.57485e-19	9.60384e-13	6.23559e-15	1.23805e-16	6.46313e-20
	9.02858e-12	4.15559e-14	9.44775e-16	4.91561e-19	2.00536e-12	9.06531e-15	1.84116e-16	8.92547e-20	6.89865e-13	4.1365e-15	7.82459e-17	3.66298e-20
	6.4698e-12	2.74845e-14	5.95141e-16	2.77458e-19	1.43702e-12	5.99566e-15	1.1598e-16	5.03791e-20	4.94351e-13	2.73582e-15	4.92894e-17	2.06754e-20
	4.62503e-12	1.81234e-14	3.73661e-16	1.55971e-19	1.02728e-12	3.95358e-15	7.28183e-17	2.83202e-20	3.53394e-13	1.80402e-15	3.09465e-17	1.16225e-20
	3.29829e-12	1.1915e-14	2.33831e-16	8.73205e-20	7.32593e-13	2.59922e-15	4.55685e-17	1.58551e-20	2.52019e-13	1.18603e-15	1.93658e-17	6.50689e-21
	2.34648e-12	7.80988e-15	1.45846e-16	4.86875e-20	5.21182e-13	1.70371e-15	2.84221e-17	8.84038e-21	1.79292e-13	7.77401e-16	1.20789e-17	3.62806e-21
	1.66531e-12	5.10381e-15	9.06673e-17	2.70362e-20	3.69886e-13	1.11338e-15	1.7669e-17	4.90907e-21	1.27245e-13	5.08037e-16	7.50903e-18	2.01467e-21
	1.17903e-12	3.3254e-15	5.6179e-17	1.49521e-20	2.61878e-13	7.25426e-16	1.0948e-17	2.71491e-21	9.00887e-14	3.31012e-16	4.65273e-18	1.11419e-21
	8.32738e-13	2.16019e-15	3.46948e-17	8.2354e-21	1.84962e-13	4.71239e-16	6.76125e-18	1.49533e-21	6.36287e-14	2.15026e-16	2.87341e-18	6.1368e-22
	5.86736e-13	1.39906e-15	2.1356e-17	4.51747e-21	1.30322e-13	3.05202e-16	4.16182e-18	8.20254e-22	4.48319e-14	1.39264e-16	1.7687e-18	3.36629e-22
	4.1241e-13	9.03406e-16	1.31022e-17	2.46793e-21	9.16015e-14	1.97076e-16	2.55333e-18	4.48112e-22	3.15118e-14	8.99257e-17	1.08512e-18	1.83903e-22
	2.89179e-13	5.81604e-16	8.01185e-18	1.34276e-21	6.42304e-14	1.26875e-16	1.56133e-18	2.4381e-22	2.20959e-14	5.78933e-17	6.63539e-19	1.00059e-22
	2.02282e-13	3.73311e-16	4.88302e-18	7.27596e-22	4.49294e-14	8.14368e-17	9.51593e-19	1.32112e-22	1.54562e-14	3.71596e-17	4.0441e-19	5.42185e-23
	1.41156e-13	2.38898e-16	2.96627e-18	3.92654e-22	3.13525e-14	5.2115e-17	5.7806e-19	7.12958e-23	1.07856e-14	2.37801e-17	2.45666e-19	2.92595e-23
	9.82638e-14	1.52424e-16	1.79597e-18	2.11036e-22	2.18256e-14	3.32509e-17	3.49995e-19	3.83187e-23	7.50824e-15	1.51724e-17	1.48742e-19	1.57259e-23
	6.824e-14	9.69601e-17	1.08381e-18	1.12962e-22	1.5157e-14	2.11516e-17	2.11211e-19	2.05109e-23	5.21415e-15	9.65148e-18	8.9761e-20	8.41761e-24
	4.72756e-14	6.14938e-17	6.51892e-19	6.0219e-23	1.05005e-14	1.34147e-17	1.27039e-19	1.09342e-23	3.61228e-15	6.12114e-18	5.39895e-20	4.48736e-24
	3.26728e-14	3.88838e-17	3.90808e-19	3.19715e-23	7.25704e-15	8.4824e-18	7.61598e-20	5.80519e-24	2.4965e-15	3.87052e-18	3.23666e-20	2.38243e-24
	2.25262e-14	2.45135e-17	2.33516e-19	1.69052e-23	5.00335e-15	5.34755e-18	4.55072e-20	3.06954e-24	1.7212e-15	2.44009e-18	1.93397e-20	1.25973e-24
	1.54932e-14	1.54078e-17	1.39071e-19	8.90232e-24	3.44123e-15	3.36117e-18	2.71019e-20	1.61643e-24	1.18382e-15	1.5337e-18	1.15178e-20	6.63377e-25
	1.06303e-14	9.65548e-18	8.25515e-20	4.6689e-24	2.36113e-15	2.10632e-18	1.60874e-20	8.47751e-25	8.12251e-16	9.61113e-19	6.83688e-21	3.47914e-25
	7.27617e-15	6.03263e-18	4.88403e-20	2.43867e-24	1.61613e-15	1.316e-18	9.51789e-21	4.42799e-25	5.55965e-16	6.00492e-19	4.04494e-21	1.81723e-25
	4.96834e-15	3.75784e-18	2.88004e-20	1.26858e-24	1.10353e-15	8.19763e-19	5.61255e-21	2.30342e-25	3.79626e-16	3.74058e-19	2.38524e-21	9.45315e-26
	3.38433e-15	2.33383e-18	1.69272e-20	6.57223e-25	7.51702e-16	5.09118e-19	3.29873e-21	1.19335e-25	2.58593e-16	2.32311e-19	1.4019e-21	4.89745e-26
	2.29977e-15	1.4451e-18	9.916e-21	3.39104e-25	5.10809e-16	3.15245e-19	1.93241e-21	6.15726e-26	1.75723e-16	1.43846e-19	8.2124e-22	2.52691e-26
	1.55901e-15	8.92125e-19	5.78969e-21	1.74254e-25	3.46276e-16	1.94615e-19	1.12828e-21	3.16399e-26	1.19123e-16	8.88028e-20	4.795e-22	1.29849e-26
	1.0543e-15	5.49101e-19	3.36931e-21	8.91778e-26	2.34174e-16	1.19785e-19	6.56603e-22	1.61924e-26	8.05583e-17	5.4658e-20	2.79045e-22	6.64529e-27
	7.11269e-16	3.3696e-19	1.95431e-21	4.54527e-26	1.57982e-16	7.3507e-20	3.80851e-22	8.25303e-27	5.43474e-17	3.35412e-20	1.61855e-22	3.38701e-27
	4.7869e-16	2.06159e-19	1.12982e-21	2.30722e-26	1.06323e-16	4.49731e-20	2.20177e-22	4.18932e-27	3.65762e-17	2.05213e-20	9.35716e-23	1.71928e-27
	3.21385e-16	1.25755e-19	6.51021e-22	1.1664e-26	7.13837e-17	2.74332e-20	1.2687e-22	2.11788e-27	2.45567e-17	1.25178e-20	5.39173e-23	8.6917e-28
	2.15253e-16	7.64801e-20	3.73892e-22	5.87262e-27	4.78105e-17	1.66839e-20	7.28632e-23	1.06632e-27	1.64473e-17	7.61289e-21	3.09656e-23	4.37612e-28
	1.43822e-16	4.63735e-20	2.14024e-22	2.94472e-27	3.19447e-17	1.01163e-20	4.17086e-23	5.34685e-28	1.09893e-17	4.61605e-21	1.77254e-23	2.19433e-28
	9.58635e-17	2.80343e-20	1.22109e-22	1.47056e-27	2.12925e-17	6.11561e-21	2.37963e-23	2.67016e-28	7.32484e-18	2.79056e-21	1.0113e-23	1.09582e-28
	6.3743e-17	1.6897e-20	6.9438e-23	7.31393e-28	1.41581e-17	3.68603e-21	1.35319e-23	1.32802e-28	4.87054e-18	1.68194e-21	5.75083e-24	5.45015e-29
	4.22828e-17	1.01537e-20	3.93563e-23	3.62281e-28	9.39155e-18	2.21501e-21	7.66966e-24	6.57808e-29	3.23079e-18	1.01071e-21	3.25947e-24	2.69962e-29
	2.798e-17	6.08335e-21	2.22329e-23	1.78717e-28	6.2147e-18	1.32707e-21	4.3327e-24	3.24504e-29	2.13792e-18	6.05541e-22	1.84132e-24	1.33175e-29
	1.84707e-17	3.63378e-21	1.25183e-23	8.78043e-29	4.10257e-18	7.92699e-22	2.43954e-24	1.5943e-29	1.41132e-18	3.61709e-22	1.03676e-24	6.54294e-30
	1.21638e-17	2.16408e-21	7.02525e-24	4.29628e-29	2.70173e-18	4.72087e-22	1.36907e-24	7.80092e-30	9.29424e-19	2.15414e-22	5.81829e-25	3.20147e-30
	7.99113e-18	1.28495e-21	3.92956e-24	2.09361e-29	1.77493e-18	2.80308e-22	7.65784e-25	3.80145e-30	6.10594e-19	1.27905e-22	3.25445e-25	1.5601e-30
	5.2372e-18	7.60672e-22	2.19075e-24	1.01608e-29	1.16325e-18	1.65939e-22	4.26928e-25	1.84493e-30	4.00169e-19	7.57178e-23	1.81437e-25	7.57154e-31
	3.42406e-18	4.4896e-22	1.21733e-24	4.91117e-30	7.60527e-19	9.79395e-23	2.3723e-25	8.91741e-31	2.61629e-19	4.46898e-23	1.00819e-25	3.65967e-31
	2.23324e-18	2.64191e-22	6.742e-25	2.36413e-30	4.96031e-19	5.76325e-23	1.31387e-25	4.29264e-31	1.7064e-19	2.62977e-23	5.5837e-26	1.76168e-31
	1.45306e-18	1.54998e-22	3.72166e-25	1.1334e-30	3.22742e-19	3.38124e-23	7.25269e-26	2.05796e-31	1.11027e-19	1.54286e-23	3.08227e-26	8.44581e-32
	9.4315e-19	9.06637e-23	2.04763e-25	5.41159e-31	2.09485e-19	1.9778e-23	3.99037e-26	9.82604e-32	7.20651e-20	9.02473e-24	1.69584e-26	4.03257e-32
	6.10704e-19	5.28737e-23	1.12287e-25	2.57331e-31	1.35645e-19	1.15343e-23	2.18823e-26	4.67247e-32	4.66633e-20	5.26308e-24	9.29961e-27	1.91756e-32
	3.94487e-19	3.07429e-23	6.13731e-26	1.21867e-31	8.76205e-20	6.70648e-24	1.19603e-26	2.2128e-32	3.01424e-20	3.06017e-24	5.0829e-27	9.08123e-33
	2.54206e-19	1.78217e-23	3.34343e-26	5.74791e-32	5.64624e-20	3.88775e-24	6.5156e-27	1.04367e-32	1.94237e-20	1.77398e-24	2.76901e-27	4.28319e-33
	1.63415e-19	1.03003e-23	1.8154e-26	2.69998e-32	3.62966e-20	2.24699e-24	3.5378e-27	4.90246e-33	1.24864e-20	1.0253e-24	1.50351e-27	2.01195e-33
	1.04797e-19	5.93543e-24	9.82466e-27	1.2631e-32	2.32768e-20	1.2948e-24	1.91461e-27	2.29346e-33	8.00745e-21	5.90817e-25	8.13675e-28	9.41227e-34
	6.70439e-20	3.40998e-24	5.29944e-27	5.88494e-33	1.48913e-20	7.43879e-25	1.03274e-27	1.06855e-33	5.12276e-21	3.39432e-25	4.38898e-28	4.3853e-34
	4.27879e-20	1.95322e-24	2.84911e-27	2.7307e-33	9.50372e-21	4.2609e-25	5.55228e-28	4.95824e-34	3.26938e-21	1.94425e-25	2.35962e-28	2.03484e-34
	2.72417e-20	1.11545e-24	1.5267e-27	1.26192e-33	6.05072e-21	2.43332e-25	2.97521e-28	2.29133e-34	2.08151e-21	1.11033e-25	1.26441e-28	9.40352e-35
	1.73021e-20	6.35106e-25	8.15392e-28	5.80791e-34	3.84302e-21	1.38547e-25	1.58902e-28	1.05457e-34	1.32204e-21	6.32189e-26	6.75305e-29	4.3279e-35
	1.09627e-20	3.60531e-25	4.34055e-28	2.66216e-34	2.43494e-21	7.86488e-26	8.45876e-29	4.83379e-35	8.37646e-22	3.58875e-26	3.59483e-29	1.98377e-35
