# Supplementary material for: Domain coupling in allosteric regulation of SthK measured using time-resolved transition metal ion FRET
Source: eLife. 2025 Aug 12;14:RP106892. doi: 10.7554/eLife.106892 (PMC12342821; doi:10.7554/eLife.106892)
Supplement: Figure 5—source data 3. [file elife-106892-fig5-data3.xlsx]

## Sheet: Sheet1
Elution Volume (mL)	Fluorescence Intensity
0	-602
0.000666	-602
0.001334	-407
0.002	-75
0.002666	-840
0.003334	-1980
0.004	-2705
0.004666	-3018
0.005334	-3260
0.006	-3238
0.006666	-2956
0.007334	-2863
0.008	-3171
0.008666	-3193
0.009334	-2936
0.01	-2752
0.010666	-2592
0.011334	-2418
0.012	-2001
0.012666	-1431
0.013334	-1035
0.014	-746
0.014666	-470
0.015334	-243
0.016	160
0.016666	607
0.017334	944
0.018	1060
0.018666	688
0.019334	341
0.02	74
0.020666	-302
0.021334	-1008
0.022	-1537
0.022666	-1647
0.023334	-1556
0.024	-1445
0.024666	-1383
0.025334	-1080
0.026	-764
0.026666	-262
0.027334	2
0.028	101
0.028666	214
0.029334	244
0.03	157
0.030666	-98
0.031334	-275
0.032	-412
0.032666	-530
0.033334	-815
0.034	-909
0.034666	-550
0.035334	-316
0.036	-42
0.036666	95
0.037334	304
0.038	285
0.038666	-207
0.039334	-529
0.04	-279
0.040666	5
0.041334	202
0.042	357
0.042666	496
0.043334	502
0.044	274
0.044666	4
0.045334	-317
0.046	-468
0.046666	-414
0.047334	-195
0.048	168
0.048666	429
0.049334	620
0.05	637
0.050666	698
0.051334	940
0.052	1249
0.052666	1513
0.053334	1375
0.054	1212
0.054666	987
0.055334	476
0.056	204
0.056666	210
0.057334	304
0.058	627
0.058666	913
0.059334	841
0.06	486
0.060666	-111
0.061334	-743
0.062	-1102
0.062666	-1086
0.063334	-912
0.064	-1038
0.064666	-1303
0.065334	-1400
0.066	-1372
0.066666	-1440
0.067334	-1527
0.068	-1436
0.068666	-1200
0.069334	-1128
0.07	-1118
0.070666	-1112
0.071334	-1269
0.072	-1391
0.072666	-1761
0.073334	-2164
0.074	-2249
0.074666	-2183
0.075334	-2163
0.076	-2323
0.076666	-2211
0.077334	-2044
0.078	-1739
0.078666	-1402
0.079334	-1118
0.08	-1074
0.080666	-1213
0.081334	-1395
0.082	-1405
0.082666	-1253
0.083334	-1235
0.084	-1268
0.084666	-1312
0.085334	-1510
0.086	-1760
0.086666	-1670
0.087334	-1477
0.088	-1332
0.088666	-1292
0.089334	-1676
0.09	-2202
0.090666	-2418
0.091334	-2578
0.092	-2624
0.092666	-2587
0.093334	-2487
0.094	-2358
0.094666	-2125
0.095334	-1645
0.096	-1298
0.096666	-1024
0.097334	-982
0.098	-1160
0.098666	-1498
0.099334	-1889
0.1	-2228
0.100666	-2383
0.101334	-2316
0.102	-2203
0.102666	-2149
0.103334	-2159
0.104	-2172
0.104666	-2126
0.105334	-2070
0.106	-1962
0.106666	-2051
0.107334	-2080
0.108	-2221
0.108666	-2791
0.109334	-3304
0.11	-3561
0.110666	-3675
0.111334	-3528
0.112	-3176
0.112666	-2903
0.113334	-2303
0.114	-1807
0.114666	-1484
0.115334	-1464
0.116	-1708
0.116666	-2002
0.117334	-2217
0.118	-2350
0.118666	-2554
0.119334	-2787
0.12	-3022
0.120666	-3253
0.121334	-3283
0.122	-3330
0.122666	-3257
0.123334	-3195
0.124	-3025
0.124666	-2556
0.125334	-2502
0.126	-2768
0.126666	-2756
0.127334	-2538
0.128	-2651
0.128666	-2738
0.129334	-2794
0.13	-2588
0.130666	-2292
0.131334	-2364
0.132	-2339
0.132666	-2154
0.133334	-1740
0.134	-1458
0.134666	-1250
0.135334	-1100
0.136	-1309
0.136666	-1680
0.137334	-1938
0.138	-2173
0.138666	-2483
0.139334	-2813
0.14	-3039
0.140666	-2986
0.141334	-3173
0.142	-3517
0.142666	-3881
0.143334	-3971
0.144	-3608
0.144666	-3220
0.145334	-2943
0.146	-3000
0.146666	-3114
0.147334	-3202
0.148	-3067
0.148666	-2649
0.149334	-2478
0.15	-2545
0.150666	-2462
0.151334	-2301
0.152	-2337
0.152666	-2425
0.153334	-2413
0.154	-2258
0.154666	-2164
0.155334	-2300
0.156	-2506
0.156666	-2657
0.157334	-2753
0.158	-2757
0.158666	-2694
0.159334	-2794
0.16	-2907
0.160666	-3158
0.161334	-3538
0.162	-3536
0.162666	-3534
0.163334	-3501
0.164	-3533
0.164666	-3670
0.165334	-3847
0.166	-3986
0.166666	-3918
0.167334	-3968
0.168	-4277
0.168666	-4547
0.169334	-4707
0.17	-4692
0.170666	-4409
0.171334	-4061
0.172	-4092
0.172666	-4084
0.173334	-4130
0.174	-4153
0.174666	-4195
0.175334	-4126
0.176	-3953
0.176666	-3577
0.177334	-3527
0.178	-3784
0.178666	-3868
0.179334	-3876
0.18	-3866
0.180666	-3613
0.181334	-3417
0.182	-3437
0.182666	-3555
0.183334	-3589
0.184	-3505
0.184666	-3315
0.185334	-3160
0.186	-2907
0.186666	-2622
0.187334	-2374
0.188	-2276
0.188666	-2450
0.189334	-2858
0.19	-3081
0.190666	-3074
0.191334	-2972
0.192	-2932
0.192666	-2735
0.193334	-2647
0.194	-2698
0.194666	-2686
0.195334	-2592
0.196	-2515
0.196666	-2539
0.197334	-2634
0.198	-2874
0.198666	-3178
0.199334	-3407
0.2	-3840
0.200666	-4205
0.201334	-4510
0.202	-4571
0.202666	-4462
0.203334	-4398
0.204	-4190
0.204666	-4294
0.205334	-4720
0.206	-5096
0.206666	-5381
0.207334	-5359
0.208	-5169
0.208666	-5020
0.209334	-5106
0.21	-5131
0.210666	-5210
0.211334	-5233
0.212	-5262
0.212666	-5301
0.213334	-5065
0.214	-4773
0.214666	-4748
0.215334	-4825
0.216	-5158
0.216666	-5644
0.217334	-6104
0.218	-6260
0.218666	-6407
0.219334	-6573
0.22	-6566
0.220666	-6615
0.221334	-6643
0.222	-6679
0.222666	-6876
0.223334	-7089
0.224	-6931
0.224666	-6561
0.225334	-6214
0.226	-5942
0.226666	-5968
0.227334	-5987
0.228	-6059
0.228666	-5956
0.229334	-5905
0.23	-5911
0.230666	-5588
0.231334	-5430
0.232	-5531
0.232666	-5859
0.233334	-6119
0.234	-6314
0.234666	-6575
0.235334	-6967
0.236	-7145
0.236666	-7112
0.237334	-6885
0.238	-6699
0.238666	-6786
0.239334	-7078
0.24	-7613
0.240666	-8161
0.241334	-8621
0.242	-8837
0.242666	-8857
0.243334	-8776
0.244	-8586
0.244666	-8484
0.245334	-8161
0.246	-7709
0.246666	-7703
0.247334	-7803
0.248	-7821
0.248666	-7796
0.249334	-7885
0.25	-7754
0.250666	-7616
0.251334	-7574
0.252	-7503
0.252666	-7333
0.253334	-7564
0.254	-7802
0.254666	-8079
0.255334	-8435
0.256	-8596
0.256666	-8680
0.257334	-8950
0.258	-9162
0.258666	-9329
0.259334	-9305
0.26	-9532
0.260666	-9643
0.261334	-9502
0.262	-9193
0.262666	-9019
0.263334	-8982
0.264	-9030
0.264666	-9128
0.265334	-9241
0.266	-9581
0.266666	-9659
0.267334	-9496
0.268	-9376
0.268666	-8991
0.269334	-8541
0.27	-8207
0.270666	-8160
0.271334	-8142
0.272	-7885
0.272666	-7778
0.273334	-7850
0.274	-7992
0.274666	-8072
0.275334	-8123
0.276	-8171
0.276666	-8172
0.277334	-8714
0.278	-9274
0.278666	-9799
0.279334	-10239
0.28	-10450
0.280666	-10340
0.281334	-10258
0.282	-10274
0.282666	-10459
0.283334	-10651
0.284	-10896
0.284666	-11224
0.285334	-11187
0.286	-11170
0.286666	-11269
0.287334	-11242
0.288	-11058
0.288666	-10805
0.289334	-10519
0.29	-10273
0.290666	-10270
0.291334	-10388
0.292	-10455
0.292666	-10321
0.293334	-10140
0.294	-9665
0.294666	-9389
0.295334	-9275
0.296	-9107
0.296666	-8995
0.297334	-9277
0.298	-9736
0.298666	-9980
0.299334	-10096
0.3	-10265
0.300666	-10354
0.301334	-10461
0.302	-10408
0.302666	-10145
0.303334	-9754
0.304	-9364
0.304666	-9128
0.305334	-9096
0.306	-9276
0.306666	-9461
0.307334	-9823
0.308	-9912
0.308666	-9902
0.309334	-9859
0.31	-9629
0.310666	-9705
0.311334	-9966
0.312	-10266
0.312666	-10127
0.313334	-9913
0.314	-9958
0.314666	-9969
0.315334	-10086
0.316	-10234
0.316666	-10401
0.317334	-10261
0.318	-10096
0.318666	-9799
0.319334	-9634
0.32	-9711
0.320666	-10090
0.321334	-10462
0.322	-10326
0.322666	-10117
0.323334	-10167
0.324	-10302
0.324666	-10321
0.325334	-10028
0.326	-9614
0.326666	-9701
0.327334	-10009
0.328	-10243
0.328666	-10378
0.329334	-10377
0.33	-10418
0.330666	-10538
0.331334	-10686
0.332	-10877
0.332666	-11123
0.333334	-11453
0.334	-11662
0.334666	-11841
0.335334	-11597
0.336	-11194
0.336666	-10581
0.337334	-9849
0.338	-9356
0.338666	-9111
0.339334	-9194
0.34	-9637
0.340666	-10134
0.341334	-10673
0.342	-11050
0.342666	-10900
0.343334	-10608
0.344	-10583
0.344666	-10691
0.345334	-10890
0.346	-10956
0.346666	-11000
0.347334	-11094
0.348	-11180
0.348666	-11108
0.349334	-10755
0.35	-10177
0.350666	-9780
0.351334	-9644
0.352	-9537
0.352666	-9512
0.353334	-9467
0.354	-9438
0.354666	-9655
0.355334	-9866
0.356	-9893
0.356666	-9537
0.357334	-9270
0.358	-9122
0.358666	-8881
0.359334	-8823
0.36	-8843
0.360666	-8951
0.361334	-8984
0.362	-9035
0.362666	-9214
0.363334	-9474
0.364	-9592
0.364666	-9579
0.365334	-9636
0.366	-9681
0.366666	-9632
0.367334	-9696
0.368	-9861
0.368666	-9913
0.369334	-10007
0.37	-10092
0.370666	-10014
0.371334	-9929
0.372	-9768
0.372666	-9663
0.373334	-9612
0.374	-9664
0.374666	-9794
0.375334	-9755
0.376	-9833
0.376666	-9813
0.377334	-9920
0.378	-10188
0.378666	-10447
0.379334	-10492
0.38	-10632
0.380666	-10885
0.381334	-10962
0.382	-11050
0.382666	-10890
0.383334	-10603
0.384	-10557
0.384666	-10715
0.385334	-10864
0.386	-10921
0.386666	-11065
0.387334	-11115
0.388	-11090
0.388666	-10907
0.389334	-10562
0.39	-10184
0.390666	-10158
0.391334	-10154
0.392	-10131
0.392666	-10057
0.393334	-9831
0.394	-9928
0.394666	-10092
0.395334	-10128
0.396	-10296
0.396666	-10363
0.397334	-10423
0.398	-10595
0.398666	-10696
0.399334	-10708
0.4	-10880
0.400666	-11245
0.401334	-11224
0.402	-11079
0.402666	-10807
0.403334	-10489
0.404	-10445
0.404666	-10719
0.405334	-10933
0.406	-10969
0.406666	-10874
0.407334	-10931
0.408	-11286
0.408666	-11532
0.409334	-11509
0.41	-11349
0.410666	-11241
0.411334	-11162
0.412	-11119
0.412666	-10987
0.413334	-10677
0.414	-10272
0.414666	-9981
0.415334	-10043
0.416	-10215
0.416666	-10310
0.417334	-10395
0.418	-10253
0.418666	-9807
0.419334	-9272
0.42	-9103
0.420666	-9295
0.421334	-9541
0.422	-9759
0.422666	-9944
0.423334	-10043
0.424	-10068
0.424666	-10008
0.425334	-10024
0.426	-10205
0.426666	-10531
0.427334	-10721
0.428	-10854
0.428666	-10865
0.429334	-10745
0.43	-10730
0.430666	-11032
0.431334	-11244
0.432	-11210
0.432666	-11099
0.433334	-11057
0.434	-11231
0.434666	-11391
0.435334	-11557
0.436	-11549
0.436666	-11509
0.437334	-11425
0.438	-11301
0.438666	-11328
0.439334	-11508
0.44	-11765
0.440666	-11957
0.441334	-12064
0.442	-12260
0.442666	-12256
0.443334	-12195
0.444	-12213
0.444666	-12134
0.445334	-12166
0.446	-12139
0.446666	-12121
0.447334	-12111
0.448	-11917
0.448666	-11774
0.449334	-11585
0.45	-11210
0.450666	-10945
0.451334	-10752
0.452	-10489
0.452666	-10501
0.453334	-10641
0.454	-10762
0.454666	-10710
0.455334	-10706
0.456	-10676
0.456666	-10719
0.457334	-10804
0.458	-10710
0.458666	-10619
0.459334	-10543
0.46	-10459
0.460666	-10412
0.461334	-10490
0.462	-10839
0.462666	-11354
0.463334	-11747
0.464	-11667
0.464666	-11738
0.465334	-11897
0.466	-11803
0.466666	-11661
0.467334	-11646
0.468	-11737
0.468666	-11700
0.469334	-11503
0.47	-11087
0.470666	-10945
0.471334	-10809
0.472	-10661
0.472666	-10597
0.473334	-10360
0.474	-10007
0.474666	-9955
0.475334	-10142
0.476	-10116
0.476666	-10083
0.477334	-9901
0.478	-9606
0.478666	-9465
0.479334	-9833
0.48	-10171
0.480666	-10247
0.481334	-10343
0.482	-10580
0.482666	-11037
0.483334	-11445
0.484	-11531
0.484666	-11359
0.485334	-11055
0.486	-11042
0.486666	-10954
0.487334	-10670
0.488	-10498
0.488666	-10519
0.489334	-10499
0.49	-10401
0.490666	-10126
0.491334	-9877
0.492	-10025
0.492666	-10315
0.493334	-10523
0.494	-10545
0.494666	-10460
0.495334	-10115
0.496	-9994
0.496666	-10146
0.497334	-10014
0.498	-10102
0.498666	-10525
0.499334	-10896
0.5	-11036
0.500666	-11091
0.501334	-11205
0.502	-11293
0.502666	-11421
0.503334	-11429
0.504	-11361
0.504666	-11223
0.505334	-11216
0.506	-11378
0.506666	-11139
0.507334	-10795
0.508	-10660
0.508666	-10849
0.509334	-11265
0.51	-11367
0.510666	-11217
0.511334	-11149
0.512	-11158
0.512666	-10918
0.513334	-10611
0.514	-10547
0.514666	-10476
0.515334	-10547
0.516	-10744
0.516666	-10875
0.517334	-10887
0.518	-10949
0.518666	-10798
0.519334	-10950
0.52	-11463
0.520666	-11777
0.521334	-12058
0.522	-12087
0.522666	-11933
0.523334	-11898
0.524	-11938
0.524666	-11933
0.525334	-11893
0.526	-12074
0.526666	-12052
0.527334	-11808
0.528	-11579
0.528666	-11507
0.529334	-11481
0.53	-11344
0.530666	-11167
0.531334	-11259
0.532	-11393
0.532666	-11572
0.533334	-11653
0.534	-11719
0.534666	-11743
0.535334	-11721
0.536	-11856
0.536666	-12091
0.537334	-12197
0.538	-11917
0.538666	-11601
0.539334	-11502
0.54	-11578
0.540666	-11698
0.541334	-11839
0.542	-11979
0.542666	-12199
0.543334	-12424
0.544	-12566
0.544666	-12755
0.545334	-12886
0.546	-12727
0.546666	-12629
0.547334	-12476
0.548	-12319
0.548666	-12272
0.549334	-12041
0.55	-11900
0.550666	-11751
0.551334	-11543
0.552	-11474
0.552666	-11565
0.553334	-11700
0.554	-11550
0.554666	-11595
0.555334	-11794
0.556	-12014
0.556666	-12079
0.557334	-12227
0.558	-12358
0.558666	-12213
0.559334	-11913
0.56	-11700
0.560666	-11788
0.561334	-11751
0.562	-11844
0.562666	-12072
0.563334	-12077
0.564	-11966
0.564666	-11750
0.565334	-11893
0.566	-12161
0.566666	-12190
0.567334	-12104
0.568	-11873
0.568666	-11963
0.569334	-12437
0.57	-12574
0.570666	-12332
0.571334	-12057
0.572	-11784
0.572666	-11811
0.573334	-11982
0.574	-12164
0.574666	-12216
0.575334	-12386
0.576	-12569
0.576666	-12853
0.577334	-12973
0.578	-12995
0.578666	-12946
0.579334	-13090
0.58	-13317
0.580666	-13522
0.581334	-13549
0.582	-13530
0.582666	-13472
0.583334	-13304
0.584	-13251
0.584666	-13407
0.585334	-13379
0.586	-13128
0.586666	-13311
0.587334	-13594
0.588	-13710
0.588666	-13657
0.589334	-13512
0.59	-13604
0.590666	-13741
0.591334	-13634
0.592	-13433
0.592666	-13372
0.593334	-13142
0.594	-12930
0.594666	-12648
0.595334	-12506
0.596	-12632
0.596666	-12617
0.597334	-12598
0.598	-12565
0.598666	-12546
0.599334	-12621
0.6	-12729
0.600666	-12838
0.601334	-13029
0.602	-12977
0.602666	-13210
0.603334	-13373
0.604	-13194
0.604666	-12958
0.605334	-12949
0.606	-13119
0.606666	-13121
0.607334	-13136
0.608	-13148
0.608666	-13089
0.609334	-12959
0.61	-13024
0.610666	-13243
0.611334	-13393
0.612	-13481
0.612666	-13614
0.613334	-13903
0.614	-14060
0.614666	-14207
0.615334	-14046
0.616	-13763
0.616666	-13657
0.617334	-13672
0.618	-13526
0.618666	-13323
0.619334	-13094
0.62	-13135
0.620666	-13168
0.621334	-13135
0.622	-12932
0.622666	-13045
0.623334	-13175
0.624	-13223
0.624666	-13252
0.625334	-13216
0.626	-13060
0.626666	-12730
0.627334	-12687
0.628	-13017
0.628666	-13294
0.629334	-13437
0.63	-13630
0.630666	-14037
0.631334	-14136
0.632	-13953
0.632666	-13884
0.633334	-13943
0.634	-13960
0.634666	-13905
0.635334	-13812
0.636	-13540
0.636666	-13387
0.637334	-13526
0.638	-13843
0.638666	-13800
0.639334	-13945
0.64	-13982
0.640666	-14138
0.641334	-14185
0.642	-14175
0.642666	-14208
0.643334	-14354
0.644	-14533
0.644666	-14664
0.645334	-14344
0.646	-13851
0.646666	-13584
0.647334	-13345
0.648	-13262
0.648666	-13463
0.649334	-13562
0.65	-13626
0.650666	-13460
0.651334	-13392
0.652	-13379
0.652666	-13342
0.653334	-13400
0.654	-13293
0.654666	-13044
0.655334	-13030
0.656	-13323
0.656666	-13458
0.657334	-13447
0.658	-13559
0.658666	-13719
0.659334	-14036
0.66	-14246
0.660666	-14470
0.661334	-14662
0.662	-14413
0.662666	-13967
0.663334	-13686
0.664	-13607
0.664666	-13612
0.665334	-13601
0.666	-13595
0.666666	-13695
0.667334	-13669
0.668	-13661
0.668666	-13688
0.669334	-13927
0.67	-14380
0.670666	-14769
0.671334	-15020
0.672	-15102
0.672666	-14894
0.673334	-14491
0.674	-14183
0.674666	-14139
0.675334	-14092
0.676	-14111
0.676666	-13969
0.677334	-13939
0.678	-13797
0.678666	-13495
0.679334	-13411
0.68	-13800
0.680666	-14139
0.681334	-14373
0.682	-14483
0.682666	-14320
0.683334	-14093
0.684	-14070
0.684666	-13830
0.685334	-13650
0.686	-13351
0.686666	-13017
0.687334	-12873
0.688	-13092
0.688666	-13212
0.689334	-13494
0.69	-13763
0.690666	-13662
0.691334	-13529
0.692	-13355
0.692666	-13296
0.693334	-13272
0.694	-13298
0.694666	-13668
0.695334	-14032
0.696	-14163
0.696666	-14168
0.697334	-14208
0.698	-14254
0.698666	-14356
0.699334	-14316
0.7	-14388
0.700666	-14291
0.701334	-14134
0.702	-14254
0.702666	-14439
0.703334	-14313
0.704	-14180
0.704666	-14180
0.705334	-14245
0.706	-14383
0.706666	-14768
0.707334	-15189
0.708	-15415
0.708666	-15523
0.709334	-15781
0.71	-15781
0.710666	-15481
0.711334	-15198
0.712	-14968
0.712666	-14984
0.713334	-14891
0.714	-14799
0.714666	-14816
0.715334	-14683
0.716	-14384
0.716666	-13914
0.717334	-13778
0.718	-13959
0.718666	-14267
0.719334	-14362
0.72	-14419
0.720666	-14458
0.721334	-14581
0.722	-14535
0.722666	-14354
0.723334	-14377
0.724	-14354
0.724666	-14345
0.725334	-14382
0.726	-14518
0.726666	-14654
0.727334	-14731
0.728	-14631
0.728666	-14582
0.729334	-14666
0.73	-14641
0.730666	-14768
0.731334	-14731
0.732	-14741
0.732666	-14713
0.733334	-14590
0.734	-14316
0.734666	-13971
0.735334	-14006
0.736	-14111
0.736666	-13822
0.737334	-13441
0.738	-13422
0.738666	-13660
0.739334	-13893
0.74	-14202
0.740666	-14429
0.741334	-14738
0.742	-14981
0.742666	-14979
0.743334	-14773
0.744	-14735
0.744666	-14891
0.745334	-14952
0.746	-15165
0.746666	-15312
0.747334	-15312
0.748	-15302
0.748666	-14909
0.749334	-14311
0.75	-14072
0.750666	-14073
0.751334	-14077
0.752	-14081
0.752666	-14065
0.753334	-14146
0.754	-14597
0.754666	-15074
0.755334	-15440
0.756	-15815
0.756666	-16163
0.757334	-15967
0.758	-15489
0.758666	-15369
0.759334	-15619
0.76	-15683
0.760666	-15432
0.761334	-15216
0.762	-15158
0.762666	-15592
0.763334	-16116
0.764	-16386
0.764666	-16491
0.765334	-16661
0.766	-16694
0.766666	-16607
0.767334	-16500
0.768	-16593
0.768666	-16513
0.769334	-16395
0.77	-16192
0.770666	-16180
0.771334	-16422
0.772	-16803
0.772666	-17110
0.773334	-16981
0.774	-16738
0.774666	-16341
0.775334	-16129
0.776	-16033
0.776666	-15914
0.777334	-15665
0.778	-15474
0.778666	-15417
0.779334	-15292
0.78	-15253
0.780666	-15227
0.781334	-15319
0.782	-15229
0.782666	-15083
0.783334	-15181
0.784	-15491
0.784666	-15823
0.785334	-16031
0.786	-15940
0.786666	-15967
0.787334	-16025
0.788	-15595
0.788666	-15105
0.789334	-15059
0.79	-15229
0.790666	-15228
0.791334	-15120
0.792	-15081
0.792666	-15108
0.793334	-15179
0.794	-15358
0.794666	-15523
0.795334	-15518
0.796	-15336
0.796666	-15088
0.797334	-14917
0.798	-14878
0.798666	-14995
0.799334	-15198
0.8	-15307
0.800666	-15383
0.801334	-15419
0.802	-15384
0.802666	-15597
0.803334	-15824
0.804	-15877
0.804666	-15827
0.805334	-15524
0.806	-15535
0.806666	-15719
0.807334	-16032
0.808	-16437
0.808666	-16769
0.809334	-17092
0.81	-17229
0.810666	-17110
0.811334	-16835
0.812	-16518
0.812666	-16146
0.813334	-16003
0.814	-16128
0.814666	-16215
0.815334	-16279
0.816	-16219
0.816666	-16118
0.817334	-16006
0.818	-15788
0.818666	-15578
0.819334	-15362
0.82	-15465
0.820666	-15501
0.821334	-15367
0.822	-15480
0.822666	-15534
0.823334	-15379
0.824	-15328
0.824666	-15397
0.825334	-15417
0.826	-15300
0.826666	-15285
0.827334	-15297
0.828	-15266
0.828666	-15239
0.829334	-15176
0.83	-15095
0.830666	-15190
0.831334	-15454
0.832	-15499
0.832666	-15446
0.833334	-15503
0.834	-15906
0.834666	-16236
0.835334	-16283
0.836	-16293
0.836666	-16298
0.837334	-16121
0.838	-16170
0.838666	-16402
0.839334	-16536
0.84	-16627
0.840666	-16591
0.841334	-16549
0.842	-16637
0.842666	-16719
0.843334	-16734
0.844	-16675
0.844666	-16673
0.845334	-16496
0.846	-16276
0.846666	-16003
0.847334	-15898
0.848	-15915
0.848666	-15926
0.849334	-16181
0.85	-16183
0.850666	-16040
0.851334	-16113
0.852	-16154
0.852666	-16131
0.853334	-16026
0.854	-15972
0.854666	-15733
0.855334	-15584
0.856	-15457
0.856666	-15227
0.857334	-15075
0.858	-15172
0.858666	-15249
0.859334	-15277
0.86	-15466
0.860666	-15718
0.861334	-15971
0.862	-16104
0.862666	-16211
0.863334	-16411
0.864	-16635
0.864666	-16644
0.865334	-16538
0.866	-16353
0.866666	-16195
0.867334	-16197
0.868	-16138
0.868666	-16185
0.869334	-16100
0.87	-15924
0.870666	-15860
0.871334	-16000
0.872	-16199
0.872666	-16197
0.873334	-16106
0.874	-15870
0.874666	-15678
0.875334	-15371
0.876	-15277
0.876666	-15484
0.877334	-15735
0.878	-15991
0.878666	-16066
0.879334	-16194
0.88	-16342
0.880666	-16406
0.881334	-16444
0.882	-16502
0.882666	-16552
0.883334	-16681
0.884	-16948
0.884666	-17019
0.885334	-17049
0.886	-16588
0.886666	-16211
0.887334	-16037
0.888	-15771
0.888666	-15516
0.889334	-15211
0.89	-15200
0.890666	-15274
0.891334	-15286
0.892	-15098
0.892666	-14794
0.893334	-14782
0.894	-15066
0.894666	-15177
0.895334	-15156
0.896	-15274
0.896666	-15382
0.897334	-15341
0.898	-15329
0.898666	-15534
0.899334	-15800
0.9	-15968
0.900666	-16094
0.901334	-16178
0.902	-16339
0.902666	-16381
0.903334	-16340
0.904	-16142
0.904666	-15836
0.905334	-15877
0.906	-16360
0.906666	-16765
0.907334	-16896
0.908	-16944
0.908666	-16877
0.909334	-16804
0.91	-16720
0.910666	-16483
0.911334	-16257
0.912	-16317
0.912666	-16458
0.913334	-16379
0.914	-16247
0.914666	-16087
0.915334	-15801
0.916	-15681
0.916666	-15699
0.917334	-15965
0.918	-16340
0.918666	-16492
0.919334	-16481
0.92	-16436
0.920666	-16216
0.921334	-15955
0.922	-15817
0.922666	-15612
0.923334	-15565
0.924	-15856
0.924666	-16268
0.925334	-16369
0.926	-16171
0.926666	-16189
0.927334	-16120
0.928	-16231
0.928666	-16222
0.929334	-16192
0.93	-16046
0.930666	-15937
0.931334	-15944
0.932	-16140
0.932666	-16200
0.933334	-16106
0.934	-16210
0.934666	-16285
0.935334	-16366
0.936	-16398
0.936666	-16574
0.937334	-17076
0.938	-17351
0.938666	-17358
0.939334	-17281
0.94	-17243
0.940666	-17157
0.941334	-17048
0.942	-16840
0.942666	-16588
0.943334	-16370
0.944	-16396
0.944666	-16346
0.945334	-16261
0.946	-16395
0.946666	-16726
0.947334	-16902
0.948	-16852
0.948666	-16560
0.949334	-16086
0.95	-15705
0.950666	-15467
0.951334	-15330
0.952	-15454
0.952666	-15742
0.953334	-15954
0.954	-16017
0.954666	-15800
0.955334	-15746
0.956	-16002
0.956666	-16236
0.957334	-16369
0.958	-16422
0.958666	-16679
0.959334	-17015
0.96	-17294
0.960666	-17366
0.961334	-17323
0.962	-17347
0.962666	-17559
0.963334	-17698
0.964	-17618
0.964666	-17365
0.965334	-17071
0.966	-17091
0.966666	-17421
0.967334	-17476
0.968	-17308
0.968666	-17368
0.969334	-17484
0.97	-17617
0.970666	-17633
0.971334	-17515
0.972	-17275
0.972666	-17025
0.973334	-16896
0.974	-16637
0.974666	-16588
0.975334	-16881
0.976	-16918
0.976666	-16891
0.977334	-16894
0.978	-16794
0.978666	-17015
0.979334	-17096
0.98	-17063
0.980666	-17334
0.981334	-17636
0.982	-17884
0.982666	-17962
0.983334	-17827
0.984	-17731
0.984666	-17874
0.985334	-18119
0.986	-18184
0.986666	-17917
0.987334	-17718
0.988	-17487
0.988666	-17281
0.989334	-17075
0.99	-16867
0.990666	-16973
0.991334	-17011
0.992	-17038
0.992666	-17012
0.993334	-17172
0.994	-17335
0.994666	-17583
0.995334	-18001
0.996	-18093
0.996666	-18007
0.997334	-17881
0.998	-17833
0.998666	-17638
0.999334	-17444
1	-17354
1.00067	-17608
1.00133	-18164
1.002	-18432
1.00267	-18515
1.00333	-18750
1.004	-18645
1.00467	-18524
1.00533	-18565
1.006	-18511
1.00667	-18483
1.00733	-18524
1.008	-18407
1.00867	-18300
1.00933	-18151
1.01	-18119
1.01067	-18166
1.01133	-17984
1.012	-17735
1.01267	-17622
1.01333	-17638
1.014	-17762
1.01467	-17737
1.01533	-17600
1.016	-17445
1.01667	-17400
1.01733	-17667
1.018	-18342
1.01867	-19140
1.01933	-19565
1.02	-19625
1.02067	-19650
1.02133	-19561
1.022	-19360
1.02267	-19171
1.02333	-18963
1.024	-18701
1.02467	-18365
1.02533	-18088
1.026	-18242
1.02667	-18494
1.02733	-18639
1.028	-18592
1.02867	-18767
1.02933	-18975
1.03	-18940
1.03067	-18677
1.03133	-18307
1.032	-17978
1.03267	-17789
1.03333	-17633
1.034	-17541
1.03467	-17613
1.03533	-17877
1.036	-18311
1.03667	-18537
1.03733	-18569
1.038	-18447
1.03867	-18087
1.03933	-17825
1.04	-17649
1.04067	-17662
1.04133	-17913
1.042	-18064
1.04267	-18243
1.04333	-18364
1.044	-18314
1.04467	-18190
1.04533	-18308
1.046	-18556
1.04667	-18628
1.04733	-18526
1.048	-18363
1.04867	-18349
1.04933	-18611
1.05	-18813
1.05067	-18730
1.05133	-18553
1.052	-18397
1.05267	-18335
1.05333	-18319
1.054	-18288
1.05467	-18011
1.05533	-17841
1.056	-17895
1.05667	-17942
1.05733	-18041
1.058	-17892
1.05867	-17729
1.05933	-17862
1.06	-18078
1.06067	-18267
1.06133	-18484
1.062	-18535
1.06267	-18476
1.06333	-18393
1.064	-18259
1.06467	-18069
1.06533	-18198
1.066	-18124
1.06667	-18113
1.06733	-18166
1.068	-18140
1.06867	-18200
1.06933	-18553
1.07	-18835
1.07067	-19342
1.07133	-19768
1.072	-19845
1.07267	-19699
1.07333	-19304
1.074	-19120
1.07467	-19090
1.07533	-18987
1.076	-18990
1.07667	-18914
1.07733	-18757
1.078	-18490
1.07867	-18304
1.07933	-18039
1.08	-17960
1.08067	-17929
1.08133	-17942
1.082	-18032
1.08267	-18172
1.08333	-18242
1.084	-18252
1.08467	-18211
1.08533	-18093
1.086	-18175
1.08667	-18434
1.08733	-18609
1.088	-18616
1.08867	-18713
1.08933	-18796
1.09	-18858
1.09067	-18884
1.09133	-18843
1.092	-18912
1.09267	-19219
1.09333	-19387
1.094	-19249
1.09467	-18991
1.09533	-18900
1.096	-18786
1.09667	-18799
1.09733	-19008
1.098	-19259
1.09867	-19518
1.09933	-19689
1.1	-19835
1.10067	-20166
1.10133	-20293
1.102	-19994
1.10267	-19940
1.10333	-19884
1.104	-19775
1.10467	-19979
1.10533	-20401
1.106	-20680
1.10667	-20697
1.10733	-20599
1.108	-20324
1.10867	-20072
1.10933	-20111
1.11	-20391
1.11067	-20687
1.11133	-21096
1.112	-21391
1.11267	-21416
1.11333	-21164
1.114	-20992
1.11467	-20701
1.11533	-20409
1.116	-20161
1.11667	-20079
1.11733	-20010
1.118	-19908
1.11867	-20028
1.11933	-20422
1.12	-20583
1.12067	-20577
1.12133	-20520
1.122	-20529
1.12267	-20392
1.12333	-20182
1.124	-20022
1.12467	-20323
1.12533	-20641
1.126	-20815
1.12667	-20851
1.12733	-21118
1.128	-21196
1.12867	-20987
1.12933	-20513
1.13	-20302
1.13067	-20323
1.13133	-20108
1.132	-19840
1.13267	-19591
1.13333	-19419
1.134	-19087
1.13467	-18785
1.13533	-18738
1.136	-18633
1.13667	-18225
1.13733	-17827
1.138	-17793
1.13867	-17892
1.13933	-17983
1.14	-18109
1.14067	-18281
1.14133	-18587
1.142	-19057
1.14267	-19711
1.14333	-20405
1.144	-20765
1.14467	-20567
1.14533	-20164
1.146	-19554
1.14667	-19218
1.14733	-19175
1.148	-19255
1.14867	-19164
1.14933	-19351
1.15	-19766
1.15067	-19796
1.15133	-19550
1.152	-19399
1.15267	-19229
1.15333	-19079
1.154	-18807
1.15467	-18548
1.15533	-18380
1.156	-18394
1.15667	-18376
1.15733	-18316
1.158	-18399
1.15867	-18595
1.15933	-18749
1.16	-18963
1.16067	-19039
1.16133	-18907
1.162	-18881
1.16267	-18976
1.16333	-18848
1.164	-18655
1.16467	-18493
1.16533	-18436
1.166	-18383
1.16667	-18226
1.16733	-18185
1.168	-18254
1.16867	-18493
1.16933	-18635
1.17	-18659
1.17067	-18665
1.17133	-18819
1.172	-18973
1.17267	-18942
1.17333	-18490
1.174	-18188
1.17467	-18069
1.17533	-17973
1.176	-17960
1.17667	-17956
1.17733	-17976
1.178	-17848
1.17867	-17776
1.17933	-17714
1.18	-17866
1.18067	-17875
1.18133	-17922
1.182	-18104
1.18267	-18616
1.18333	-19149
1.184	-19372
1.18467	-19406
1.18533	-19160
1.186	-18986
1.18667	-18912
1.18733	-18877
1.188	-18545
1.18867	-18106
1.18933	-18045
1.19	-17833
1.19067	-17715
1.19133	-17451
1.192	-17278
1.19267	-16980
1.19333	-16830
1.194	-16978
1.19467	-17212
1.19533	-17434
1.196	-17795
1.19667	-17685
1.19733	-17199
1.198	-16918
1.19867	-16632
1.19933	-16540
1.2	-16646
1.20067	-16529
1.20133	-16409
1.202	-16275
1.20267	-16073
1.20333	-16139
1.204	-16041
1.20467	-15698
1.20533	-15494
1.206	-15433
1.20667	-15267
1.20733	-14916
1.208	-14430
1.20867	-14238
1.20933	-14166
1.21	-14112
1.21067	-14063
1.21133	-13896
1.212	-13917
1.21267	-13851
1.21333	-13667
1.214	-13459
1.21467	-13338
1.21533	-13153
1.216	-12926
1.21667	-12887
1.21733	-12767
1.218	-12703
1.21867	-12579
1.21933	-12315
1.22	-12174
1.22067	-12251
1.22133	-12404
1.222	-12551
1.22267	-12426
1.22333	-12146
1.224	-12049
1.22467	-12174
1.22533	-12337
1.226	-12487
1.22667	-12710
1.22733	-12853
1.228	-12974
1.22867	-12989
1.22933	-12812
1.23	-12565
1.23067	-12324
1.23133	-12140
1.232	-11937
1.23267	-11862
1.23333	-11891
1.234	-11745
1.23467	-11609
1.23533	-11232
1.236	-11200
1.23667	-11172
1.23733	-10987
1.238	-10736
1.23867	-10660
1.23933	-10483
1.24	-10109
1.24067	-9881
1.24133	-9803
1.242	-9743
1.24267	-9433
1.24333	-9084
1.244	-8919
1.24467	-8878
1.24533	-8947
1.246	-8940
1.24667	-8979
1.24733	-9105
1.248	-9194
1.24867	-9442
1.24933	-9547
1.25	-9364
1.25067	-9181
1.25133	-9108
1.252	-9055
1.25267	-8908
1.25333	-8643
1.254	-8328
1.25467	-8015
1.25533	-7832
1.256	-7597
1.25667	-7506
1.25733	-7453
1.258	-7084
1.25867	-6994
1.25933	-7171
1.26	-7155
1.26067	-7058
1.26133	-7043
1.262	-7140
1.26267	-7173
1.26333	-7432
1.264	-8135
1.26467	-8697
1.26533	-8751
1.266	-8613
1.26667	-8277
1.26733	-8093
1.268	-7957
1.26867	-7955
1.26933	-7944
1.27	-8050
1.27067	-8091
1.27133	-8141
1.272	-7934
1.27267	-7642
1.27333	-7578
1.274	-7797
1.27467	-7808
1.27533	-7842
1.276	-7919
1.27667	-7901
1.27733	-7842
1.278	-7764
1.27867	-7702
1.27933	-7726
1.28	-7787
1.28067	-7758
1.28133	-7600
1.282	-7230
1.28267	-6799
1.28333	-6560
1.284	-6470
1.28467	-6459
1.28533	-6335
1.286	-6313
1.28667	-6418
1.28733	-6348
1.288	-6426
1.28867	-6589
1.28933	-6732
1.29	-6942
1.29067	-7176
1.29133	-7276
1.292	-7243
1.29267	-7100
1.29333	-6912
1.294	-6872
1.29467	-6817
1.29533	-6716
1.296	-6468
1.29667	-6359
1.29733	-6326
1.298	-5966
1.29867	-5836
1.29933	-6060
1.3	-6278
1.30067	-6284
1.30133	-6308
1.302	-6452
1.30267	-6646
1.30333	-6785
1.304	-6791
1.30467	-6733
1.30533	-6628
1.306	-6666
1.30667	-6931
1.30733	-7114
1.308	-7166
1.30867	-6946
1.30933	-6717
1.31	-6690
1.31067	-6667
1.31133	-6819
1.312	-6964
1.31267	-7159
1.31333	-7213
1.314	-7361
1.31467	-7296
1.31533	-7005
1.316	-6905
1.31667	-6958
1.31733	-7242
1.318	-7401
1.31867	-7330
1.31933	-7299
1.32	-7309
1.32067	-7278
1.32133	-7152
1.322	-7312
1.32267	-7654
1.32333	-8091
1.324	-8523
1.32467	-8777
1.32533	-8624
1.326	-8323
1.32667	-8359
1.32733	-8185
1.328	-7892
1.32867	-7917
1.32933	-8286
1.33	-8626
1.33067	-8873
1.33133	-9009
1.332	-8953
[truncated: 4,002 more rows]
