# Supplementary material for: Domain coupling in allosteric regulation of SthK measured using time-resolved transition metal ion FRET
Source: eLife. 2025 Aug 12;14:RP106892. doi: 10.7554/eLife.106892 (PMC12342821; doi:10.7554/eLife.106892)
Supplement: Figure 6—source data 1. [file elife-106892-fig6-data1.xlsx]

## Sheet: Figure 6 - B 
	B - Representative Traces							B- Weighted Residuals
	SthKFull - S361Acd		SthKFull-S361Acd-V416C					SthKcterm-S361Acd		SthKcterm-S361Acd-V416C
Time (s)	'+[Ru(bpy)2phenM]2+	+[Ru(bpy)2phenM]2+ 320uM cAMP	+[Ru(bpy)2phenM]2+	+[Ru(bpy)2phenM]2+ +0.5uM cAMP	+[Ru(bpy)2phenM]2+ + 320uM cAMP		Time (s)	'+[Ru(bpy)2phenM]2+		+[Ru(bpy)2phenM]2+	+[Ru(bpy)2phenM]2+ +1uM cAMP	+[Ru(bpy)2phenM]2+ + 320uM cAMP
0	0.000189752	0	0.00040158	0.000271039	0.000269324		0	-0.950509		0.262562	-0.189669	-0.0415856
2.5e-11	0.000189752	0.000180378	0.00033465	0.000271039	0.000471317		2.5e-11	-0.950509		-0.168152	-0.189669	1.4429
5e-11	0.000379504	0.000360755	0.000535439	0.000271039	0.000403986		5e-11	0.945293		1.12399	-0.189669	0.948072
7.5e-11	0.000379504	0.000180378	0.00020079	0.000338799	0.000471317		7.5e-11	-0.318575		-1.02958	0.287185	1.4429
1e-10	0.000379504	0.000180378	0.00013386	0.000406559	0.000269324		1e-10	-0.318575		-1.4603	0.764038	-0.0415856
1.25e-10	0.000189752	0.000180378	0.00020079	0.000406559	0.000134662		1.25e-10	-0.318575		-1.02958	0.764038	-1.03124
1.5e-10	0.000189752	0	0.000602369	6.77599e-05	0.000201993		1.5e-10	0.313359		1.55471	-1.62023	-0.536414
1.75e-10	0.000379504	0	0.00026772	0.000406559	0.000403986		1.75e-10	0.313359		-0.598867	0.764038	0.948072
2e-10	0.000948761	0.000180378	0.000602369	0.000406559	0.000605979		2e-10	0.313359		1.55471	0.764038	2.43256
2.25e-10	0.000189752	0.000180378	0.00040158	0.000338799	0.000269324		2.25e-10	-0.318575		0.262562	0.287185	-0.0415856
2.5e-10	0.000189752	0.000541133	0.00040158	0.00020328	0.000201993		2.5e-10	-0.950509		0.262562	-0.666522	-0.536414
2.75e-10	0	0.000180378	0.00026772	0.00013552	0.000403986		2.75e-10	-0.950509		-0.598867	-1.14338	0.948072
3e-10	0.000948761	0.00072151	0.00033465	0	0		3e-10	-0.950509		-0.168152	-2.09708	-2.0209
3.25e-10	0.000189752	0	0.00013386	0.000271039	0.000538648		3.25e-10	-1.58244		-1.4603	-0.189669	1.93773
3.5e-10	0.000189752	0.000180378	0.000468509	0.000677599	0.000269324		3.5e-10	-0.318575		0.693276	2.67145	-0.0415856
3.75e-10	0.000379504	0.000360755	0.00026772	0.00013552	0.000605979		3.75e-10	-0.318575		-0.598867	-1.14338	2.43256
4e-10	0.000379504	0.000180378	0.00033465	0.000338799	0.000336655		4e-10	-0.318575		-0.168152	0.287185	0.453243
4.25e-10	0	0.000360755	0.00026772	0.00020328	0.000740641		4.25e-10	-0.950509		-0.598867	-0.666522	3.42222
4.5e-10	0.000379504	0.000180378	0.00026772	0.00020328	0.000336655		4.5e-10	0.313359		-0.598867	-0.666522	0.453243
4.75e-10	0.00113851	0.000360755	0.000602369	0.000406559	6.7331e-05		4.75e-10	-0.318575		1.55471	0.764038	-1.52607
5e-10	0.000189752	0.000180378	0.000803159	0.000338799	6.7331e-05		5e-10	-0.318575		2.84685	0.287185	-1.52607
5.25e-10	0.000379504	0	0.000535439	0.00013552	0.000336655		5.25e-10	-0.950509		1.12399	-1.14338	0.453243
5.5e-10	0.000569256	0.000360755	0.00026772	0.000745358	0.000201993		5.5e-10	0.313359		-0.598867	3.1483	-0.536414
5.75e-10	0.000569256	0	0.00020079	0.00020328	0.000134662		5.75e-10	0.945293		-1.02958	-0.666522	-1.03124
6e-10	0.000379504	0.000360755	0.00020079	0.00013552	0.000471317		6e-10	-0.318575		-1.02958	-1.14338	1.4429
6.25e-10	0.000189752	0.000541133	0.00020079	0.000406559	0.000336655		6.25e-10	0.313359		-1.02958	0.764038	0.453243
6.5e-10	0.000189752	0	0.000602369	0.000677599	0.000336655		6.5e-10	-0.318575		1.55471	2.67145	0.453243
6.75e-10	0.000189752	0.000360755	0.000468509	0.000271039	0.000538648		6.75e-10	-0.950509		0.693276	-0.189669	1.93773
7e-10	0.000379504	0.000360755	0.00033465	0.00013552	0.000336655		7e-10	0.313359		-0.168152	-1.14338	0.453243
7.25e-10	0.000379504	0.000541133	0.000468509	0.000542079	6.7331e-05		7.25e-10	-0.318575		0.693276	1.71774	-1.52607
7.5e-10	0.000379504	0	0.00013386	0.00013552	0.000471317		7.5e-10	-1.58244		-1.4603	-1.14338	1.4429
7.75e-10	0.000379504	0.000180378	0.000468509	0.00013552	0.000403986		7.75e-10	-0.318575		0.693276	-1.14338	0.948072
8e-10	0.000379504	0	0.00040158	0.000609839	0.000134662		8e-10	-0.318575		0.262562	2.1946	-1.03124
8.25e-10	0.000379504	0	0.00020079	0.00020328	0.000269324		8.25e-10	-0.950509		-1.02958	-0.666522	-0.0415856
8.5e-10	0.000189752	0.000180378	0.00026772	0.00020328	6.7331e-05		8.5e-10	-0.950509		-0.598867	-0.666522	-1.52607
8.75e-10	0.000759008	0.000360755	0.00040158	0.000338799	0.000336655		8.75e-10	-1.58244		0.262562	0.287185	0.453243
9e-10	0.000379504	0.000360755	0.000602369	0.000406559	0.000201993		9e-10	-0.318575		1.55471	0.764038	-0.536414
9.25e-10	0.000189752	0.000541133	0.00026772	0.000474319	0.000403986		9.25e-10	0.945293		-0.598867	1.24089	0.948072
9.5e-10	0.000948761	0.000180378	0.00040158	0.00020328	6.7331e-05		9.5e-10	-0.318575		0.262562	-0.666522	-1.52607
9.75e-10	0.000189752	0.000180378	0.00013386	0	0.000403986		9.75e-10	-1.58244		-1.4603	-2.09708	0.948072
1e-09	0	0.000360755	0.000468509	0.00020328	0.000471317		1e-09	-1.58244		0.693276	-0.666522	1.4429
1.025e-09	0.000379504	0.000180378	0.00020079	0.00013552	0.000201993		1.025e-09	-1.58244		-1.02958	-1.14338	-0.536414
1.05e-09	0.000189752	0.000180378	0.00033465	0.000406559	0.000269324		1.05e-09	-0.318575		-0.168152	0.764038	-0.0415856
1.075e-09	0.000569256	0.000360755	0.00020079	6.77599e-05	0.000471317		1.075e-09	-0.318575		-1.02958	-1.62023	1.4429
1.1e-09	0.000569256	0.000360755	0.00013386	0.000406559	0.000269324		1.1e-09	-0.318575		-1.4603	0.764038	-0.0415856
1.125e-09	0	0.000180378	0.00020079	0.00013552	0.000538648		1.125e-09	-0.318575		-1.02958	-1.14338	1.93773
1.15e-09	0	0.000180378	0.00026772	0.000406559	0.000538648		1.15e-09	-0.950509		-0.598867	0.764038	1.93773
1.175e-09	0	0.000180378	0.000535439	0.000406559	0.000269324		1.175e-09	-0.950509		1.12399	0.764038	-0.0415856
1.2e-09	0.000379504	0.000180378	0.00040158	0.000338799	0.000201993		1.2e-09	-0.950509		0.262562	0.287185	-0.536414
1.225e-09	0.000569256	0	0.00040158	6.77599e-05	0.000201993		1.225e-09	-1.58244		0.262562	-1.62023	-0.536414
1.25e-09	0.000189752	0.000180378	0.000669299	0.00020328	0.000403986		1.25e-09	-0.318575		1.98542	-0.666522	0.948072
1.275e-09	0.000379504	0	0.00040158	0.00013552	0.000201993		1.275e-09	-1.58244		0.262562	-1.14338	-0.536414
1.3e-09	0.000189752	0	0.00040158	0.000338799	0.000336655		1.3e-09	0.313359		0.262562	0.287185	0.453243
1.325e-09	0.000189752	0.00072151	0.000468509	0.000542079	0.000269324		1.325e-09	-0.318575		0.693276	1.71774	-0.0415856
1.35e-09	0.000569256	0.000180378	0.00020079	0.000542079	0.000336655		1.35e-09	-0.950509		-1.02958	1.71774	0.453243
1.375e-09	0.000379504	0	0.000602369	0.000271039	0.000269324		1.375e-09	-0.950509		1.55471	-0.189669	-0.0415856
1.4e-09	0.000189752	0.000180378	0.000468509	0.000406559	6.7331e-05		1.4e-09	-0.950509		0.693276	0.764038	-1.52607
1.425e-09	0.000569256	0.000180378	0.00020079	0.000338799	0.000201993		1.425e-09	-1.58244		-1.02958	0.287185	-0.536414
1.45e-09	0.000379504	0.000541133	0.00026772	0.000271039	0.000269324		1.45e-09	-0.950509		-0.598867	-0.189669	-0.0415856
1.475e-09	0.000189752	0.000180378	0.00040158	0.00020328	0.000336655		1.475e-09	-0.318575		0.262562	-0.666522	0.453243
1.5e-09	0.000379504	0.000541133	0.00013386	0.000338799	0.000403986		1.5e-09	0.313359		-1.4603	0.287185	0.948072
1.525e-09	0.000379504	0.000180378	0.00033465	0.000271039	0.000471317		1.525e-09	-0.950509		-0.168152	-0.189669	1.4429
1.55e-09	0.000379504	0	0.00033465	0.00013552	0.000269324		1.55e-09	-1.58244		-0.168152	-1.14338	-0.0415856
1.575e-09	0	0	0.000535439	0.000338799	0.000269324		1.575e-09	-0.950509		1.12399	0.287185	-0.0415856
1.6e-09	0.000189752	0.00072151	0.00040158	0.00020328	0.000269324		1.6e-09	-0.950509		0.262562	-0.666522	-0.0415856
1.625e-09	0.000379504	0.000541133	0.00033465	0.000271039	0.000269324		1.625e-09	-0.950509		-0.168152	-0.189669	-0.0415856
1.65e-09	0	0.000180378	0.000602369	0.000338799	0.000134662		1.65e-09	-0.950509		1.55471	0.287185	-1.03124
1.675e-09	0.000759008	0	0.000602369	0.000338799	0.000403986		1.675e-09	-0.950509		1.55471	0.287185	0.948072
1.7e-09	0.000189752	0.000541133	0.00040158	0.000474319	0.000269324		1.7e-09	-1.58244		0.262562	1.24089	-0.0415856
1.725e-09	0.000189752	0.000180378	0.00026772	0.00020328	0.000269324		1.725e-09	-0.950509		-0.598867	-0.666522	-0.0415856
1.75e-09	0.000379504	0.000541133	0.000468509	0.000271039	0.000201993		1.75e-09	-0.950509		0.693276	-0.189669	-0.536414
1.775e-09	0.000379504	0.00072151	0.000535439	0.00020328	0.000134662		1.775e-09	-1.58244		1.12399	-0.666522	-1.03124
1.8e-09	0.000189752	0.000360755	0.00033465	0.00020328	0.000269324		1.8e-09	0.313359		-0.168152	-0.666522	-0.0415856
1.825e-09	0.000379504	0.000541133	0.00020079	0.000271039	0.000201993		1.825e-09	-0.318575		-1.02958	-0.189669	-0.536414
1.85e-09	0.000189752	0.00072151	0.00040158	0.00020328	0.000740641		1.85e-09	-0.318575		0.262562	-0.666522	3.42222
1.875e-09	0.000189752	0.000360755	0.00013386	0.000271039	0.000269324		1.875e-09	-0.950509		-1.4603	-0.189669	-0.0415856
1.9e-09	0.000189752	0	0.00040158	0.00020328	0.000269324		1.9e-09	-0.950509		0.262562	-0.666522	-0.0415856
1.925e-09	0.000379504	0	0.00033465	0.00020328	0.000201993		1.925e-09	-0.950509		-0.168152	-0.666522	-0.536414
1.95e-09	0.000189752	0.000180378	0.000535439	0.000338799	0.000201993		1.95e-09	0.313359		1.12399	0.287185	-0.536414
1.975e-09	0	0	0.00013386	0.000338799	0.000134662		1.975e-09	-0.950509		-1.4603	0.287185	-1.03124
2e-09	0	0	0.00026772	0.00013552	0.000336655		2e-09	0.313359		-0.598867	-1.14338	0.453243
2.025e-09	0	0.000180378	0.00040158	6.77599e-05	0.000403986		2.025e-09	0.945293		0.262562	-1.62023	0.948072
2.05e-09	0.000189752	0.000541133	0.00013386	0.000338799	0.000269324		2.05e-09	0.313359		-1.4603	0.287185	-0.0415856
2.075e-09	0	0.000180378	0.00033465	0.000474319	0.000134662		2.075e-09	-1.58244		-0.168152	1.24089	-1.03124
2.1e-09	0.000379504	0.000360755	0.00033465	0.00020328	0.000336655		2.1e-09	0.313359		-0.168152	-0.666522	0.453243
2.125e-09	0	0.000180378	0.000468509	0.00020328	0.000403986		2.125e-09	-0.950509		0.693276	-0.666522	0.948072
2.15e-09	0.000189752	0.000541133	0.00033465	0.00013552	0.000538648		2.15e-09	-0.950509		-0.168152	-1.14338	1.93773
2.175e-09	0	0.000360755	0.00040158	0.000338799	0.000403986		2.175e-09	-0.950509		0.262562	0.287185	0.948072
2.2e-09	0.000379504	0.000541133	0.00026772	0.000271039	0.000134662		2.2e-09	-0.950509		-0.598867	-0.189669	-1.03124
2.225e-09	0.000189752	0.000360755	0.000602369	0.00020328	0.000134662		2.225e-09	0.945293		1.55471	-0.666522	-1.03124
2.25e-09	0	0.000360755	0.00026772	0.000474319	0.000201993		2.25e-09	-0.950509		-0.598867	1.24089	-0.536414
2.275e-09	0	0.000541133	0.000602369	0.00020328	0.000201993		2.275e-09	-0.950509		1.55471	-0.666522	-0.536414
2.3e-09	0	0	0.00040158	0.000338799	0.000336655		2.3e-09	0.945293		0.262562	0.287185	0.453243
2.325e-09	0.000379504	0.000180378	0.00033465	0.00013552	0.000336655		2.325e-09	0.313359		-0.168152	-1.14338	0.453243
2.35e-09	0.000569256	0.000541133	0.00020079	0.00013552	0.000471317		2.35e-09	-0.950509		-1.02958	-1.14338	1.4429
2.375e-09	0	0.000360755	0.00026772	0.00020328	0.000538648		2.375e-09	0.313359		-0.598867	-0.666522	1.93773
2.4e-09	0.00113851	0	0.00013386	0.000271039	0.000134662		2.4e-09	-0.318575		-1.4603	-0.189669	-1.03124
2.425e-09	0.000189752	0	0.00026772	0.000609839	6.7331e-05		2.425e-09	-0.950509		-0.598867	2.1946	-1.52607
2.45e-09	0.000379504	0.000541133	0.00020079	0.00020328	6.7331e-05		2.45e-09	-0.950509		-1.02958	-0.666522	-1.52607
2.475e-09	0.000189752	0.000360755	0.00033465	0.000338799	0.000269324		2.475e-09	-0.950509		-0.168152	0.287185	-0.0415856
2.5e-09	0	0	0.00026772	0.000406559	0.000269324		2.5e-09	-0.950509		-0.598867	0.764038	-0.0415856
2.525e-09	0.000569256	0.000541133	0.00020079	0.000542079	0.000134662		2.525e-09	-0.950509		-1.02958	1.71774	-1.03124
2.55e-09	0	0	0.00026772	0.000338799	0.000201993		2.55e-09	1.57723		-0.598867	0.228992	-0.634695
2.575e-09	0.000189752	0.000901888	0.000736229	0.000338799	0.000201993		2.575e-09	-0.950509		2.41613	0.185597	-0.709372
2.6e-09	0.000189752	0.000180378	0.00040158	0.00013552	0.000201993		2.6e-09	-1.5872		0.262562	-1.21016	-0.701508
2.625e-09	0.000569256	0.000541133	0.00033465	0.000271039	0.000201993		2.625e-09	-0.984643		-0.168152	-0.274242	-0.74128
2.65e-09	0	0.000541133	0.00013386	0.000338799	0.000403986		2.65e-09	-0.982884		-1.4603	0.195224	0.6164
2.675e-09	0.000379504	0.000360755	0.00020079	0.00020328	0.000471317		2.675e-09	0.26429		-1.10346	-0.737321	1.09164
2.7e-09	0.00113851	0	0.000535439	0.000880878	0.000538648		2.7e-09	-0.981246		0.873153	3.94041	1.56709
2.725e-09	0.000189752	0.000180378	0.00020079	0.000406559	0.000875303		2.725e-09	-0.357491		-1.27633	0.547265	3.70315
2.75e-09	0.000569256	0.000901888	0.00020079	0.000338799	0.000269324		2.75e-09	-1.60871		-1.35008	-0.0899961	-0.591552
2.775e-09	0.000759008	0.000901888	0.000736229	0.000880878	0.000942634		2.775e-09	0.817317		1.72084	3.21393	3.45214
2.8e-09	0.00113851	0.00072151	0.00040158	0.000813118	0.00067331		2.8e-09	-1.05087		-0.407053	2.67188	1.56856
2.825e-09	0.000569256	0.00126264	0.000602369	0.000474319	0.000875303		2.825e-09	0.709451		0.424137	0.385892	2.64409
2.85e-09	0.00170777	0.00108227	0.000736229	0.0010164	0.00134662		2.85e-09	0.0794657		0.937735	3.18014	5.48919
2.875e-09	0.00170777	0.00198415	0.00127167	0.00108416	0.0010773		2.875e-09	-0.50672		3.18909	3.10201	3.53898
2.9e-09	0.000948761	0.00144302	0.00147246	0.00182952	0.00141395		2.9e-09	-1.68843		3.1362	5.74228	4.51366
2.925e-09	0.00284628	0.00216453	0.0013386	0.00216832	0.00222192		2.925e-09	-1.69178		2.00048	5.6324	6.92168
2.95e-09	0.00246678	0.0032468	0.00180711	0.00223608	0.00215459		2.95e-09	1.78679		3.14709	4.18366	5.24293
2.975e-09	0.00151802	0.00180378	0.00207483	0.00291367	0.00215459		2.975e-09	-1.73043		2.94646	5.11099	3.94889
3e-09	0.00360529	0.00468982	0.00287799	0.00365903	0.00356854		3e-09	1.15376		3.9403	5.67017	7.09771
3.025e-09	0.00455405	0.00360755	0.00327957	0.00345575	0.00316456		3.025e-09	-0.626665		3.27246	3.22165	3.70059
3.05e-09	0.00645157	0.00523095	0.00414966	0.00542079	0.00504982		3.05e-09	-0.157398		3.12692	5.57366	5.92228
3.075e-09	0.00967736	0.00739548	0.00588983	0.00609839	0.00592513		3.075e-09	-0.148086		4.02348	3.82555	4.43782
3.1e-09	0.0108159	0.0104619	0.00756308	0.00718255	0.00794506		3.1e-09	0.411917		2.90968	1.87969	3.62237
3.125e-09	0.0187855	0.0167751	0.0104411	0.0110449	0.0124562		3.125e-09	0.416525		0.789296	1.00596	3.05288
3.15e-09	0.0381402	0.035354	0.0222207	0.0215476	0.0239698		3.15e-09	1.48317		0.516278	-0.379083	2.18536
3.175e-09	0.110056	0.0822522	0.0486581	0.0502778	0.0515082		3.175e-09	0.711379		-2.17949	-1.93161	-0.817927
3.2e-09	0.218594	0.182181	0.109899	0.113972	0.123956		3.2e-09	0.971555		-4.75874	-3.53534	-0.437812
3.225e-09	0.391838	0.320711	0.227963	0.243393	0.248451		3.225e-09	3.18975		-3.47365	-0.483936	-0.462116
3.25e-09	0.540794	0.502352	0.393615	0.415707	0.410046		3.25e-09	2.13407		0.16597	1.72465	-0.983095
3.275e-09	0.727699	0.650622	0.556388	0.57684	0.588742		3.275e-09	0.73654		0.957204	0.515379	0.424498
3.3e-09	0.8499	0.803041	0.709859	0.724353	0.73687		3.3e-09	0.299805		3.07738	1.03677	0.296597
3.325e-09	0.938893	0.905135	0.823974	0.837309	0.831942		3.325e-09	1.12201		4.08635	1.35081	-2.11863
3.35e-09	0.98747	0.9652	0.888093	0.921263	0.911123		3.35e-09	2.96365		2.49993	2.27625	-1.68706
3.375e-09	1.0535	1.02599	0.952346	0.964291	0.955158		3.375e-09	3.39964		4.10224	1.63279	-1.97787
3.4e-09	1.07419	1.03753	0.98233	1	1		3.4e-09	4.57		3.84553	2.77259	0.516855
3.425e-09	1.04724	1.05593	1	0.989158	0.989227		3.425e-09	1.04206		3.7792	0.0127094	-1.78567
3.45e-09	1.06982	1.0875	0.992035	0.992072	0.993873		3.45e-09	2.69509		1.82127	0.186098	-0.855844
3.475e-09	1.06698	1.03212	0.988153	0.982179	0.9899		3.475e-09	0.643884		1.27426	-0.411609	-0.0604456
3.5e-09	1.06166	1.04709	0.997256	0.986177	0.967614		3.5e-09	-0.357432		2.83057	1.20457	-0.962744
3.525e-09	1.04743	1.04475	0.977043	0.971947	0.952599		3.525e-09	-1.73237		1.0434	0.901416	-0.75778
3.55e-09	1.04591	1.05846	0.965665	0.94979	0.941893		3.55e-09	-4.07414		0.554419	-0.259794	0.0880577
3.575e-09	1.03358	1.04006	0.940834	0.943488	0.925734		3.575e-09	-4.57427		-1.49618	0.591958	0.277726
3.6e-09	1.01745	1.03429	0.932602	0.941455	0.898734		3.6e-09	-0.987437		-1.41069	1.97582	-0.980893
3.625e-09	1.02409	1.002	0.934007	0.916926	0.886009		3.625e-09	-1.33216		-0.057819	0.527275	-0.471544
3.65e-09	1.02751	1.02851	0.914865	0.900596	0.878333		3.65e-09	2.51734		-1.26929	0.123617	0.686362
3.675e-09	1.04933	1.00759	0.896259	0.883589	0.864395		3.675e-09	4.84946		-2.41172	-0.37998	1.02235
3.7e-09	1.01764	0.990634	0.905227	0.873154	0.844129		3.7e-09	6.10592		-0.0334994	-0.0619637	0.486812
3.725e-09	0.991075	0.971153	0.868014	0.851741	0.822313		3.725e-09	6.52745		-3.61383	-1.22095	-0.33686
3.75e-09	0.996958	0.982517	0.87618	0.855197	0.808511		3.75e-09	7.04201		-1.36738	0.837779	-0.161746
3.775e-09	0.993163	0.978729	0.852687	0.840426	0.79693		3.775e-09	6.84521		-3.25013	0.431345	0.228007
3.8e-09	0.992404	0.974039	0.860786	0.823011	0.795516		3.8e-09	8.0346		-1.04979	-0.416155	1.9085
3.825e-09	0.978552	0.973859	0.843518	0.806478	0.772219		3.825e-09	6.609		-2.21253	-1.21773	0.474326
3.85e-09	0.977034	0.951131	0.834148	0.804581	0.765217		3.85e-09	6.1942		-2.36373	-0.0929378	1.22618
3.875e-09	0.9647	0.957083	0.843116	0.797398	0.758214		3.875e-09	6.16411		-0.0949227	0.282485	1.93087
3.9e-09	0.970772	0.933815	0.828258	0.780187	0.73613		3.9e-09	4.95554		-1.00809	-0.745226	0.44942
3.925e-09	0.973618	0.967906	0.813466	0.773479	0.733302		3.925e-09	5.2006		-1.93197	-0.366125	1.66826
3.95e-09	0.945914	0.939406	0.800683	0.78161	0.706168		3.95e-09	5.67745		-2.60725	2.05198	-0.640771
3.975e-09	0.973428	0.938685	0.792116	0.76406	0.701387		3.975e-09	4.38484		-2.73865	0.898198	0.236159
4e-09	0.958058	0.947163	0.796868	0.745968	0.700781		4e-09	3.25567		-1.07966	-0.380081	1.6873
4.025e-09	0.94933	0.940489	0.788033	0.745358	0.675061		4.025e-09	4.89752		-1.29396	0.746925	-0.619541
4.05e-09	0.921626	0.910005	0.770698	0.733229	0.673849		4.05e-09	1.54175		-2.70875	0.201374	0.626061
4.075e-09	0.91859	0.908201	0.766147	0.724827	0.6723		4.075e-09	4.25117		-2.39736	0.141193	1.78162
4.1e-09	0.916882	0.92191	0.764942	0.722252	0.65035		4.1e-09	2.10347		-1.64728	0.885112	-0.169477
4.125e-09	0.920488	0.908201	0.763001	0.699959	0.640183		4.125e-09	0.444744		-1.0026	-1.24159	-0.388252
4.15e-09	0.899425	0.901166	0.758718	0.711207	0.647186		4.15e-09	1.81703		-0.689644	1.4518	1.99358
4.175e-09	0.916503	0.90766	0.741383	0.693048	0.635537		4.175e-09	1.90541		-2.21961	-0.122284	1.51518
4.2e-09	0.922575	0.910907	0.731544	0.693251	0.619849		4.2e-09	1.09761		-2.7096	0.973492	0.383075
4.225e-09	0.906256	0.910005	0.727662	0.687763	0.619445		4.225e-09	1.88787		-2.37218	1.22392	1.59611
4.25e-09	0.879881	0.920647	0.727662	0.673465	0.608672		4.25e-09	1.13026		-1.49901	0.147502	1.1601
4.275e-09	0.881019	0.896477	0.724316	0.663843	0.603824		4.275e-09	-0.539181		-1.1136	-0.272427	1.61562
4.3e-09	0.888609	0.900445	0.715816	0.656051	0.600323		4.3e-09	0.326757		-1.48659	-0.45418	2.25058
4.325e-09	0.901892	0.890704	0.714879	0.660455	0.57871		4.325e-09	1.99752		-0.794727	1.16482	-0.0441962
4.35e-09	0.885004	0.889803	0.696607	0.640602	0.574333		4.35e-09	-1.16581		-2.62222	-0.886617	0.380196
4.375e-09	0.882727	0.86924	0.703099	0.64609	0.566792		4.375e-09	0.57147		-0.886524	0.872159	0.273933
4.4e-09	0.854264	0.868157	0.693327	0.644057	0.573727		4.4e-09	-2.32839		-1.52029	1.48535	2.51013
4.425e-09	0.879311	0.882407	0.6865	0.632674	0.55373		4.425e-09	0.206185		-1.7286	0.664085	0.336952
4.45e-09	0.882727	0.865271	0.697744	0.624272	0.545381		4.45e-09	0.714157		0.711467	0.284311	0.0441945
4.475e-09	0.861095	0.868879	0.675791	0.621019	0.538648		4.475e-09	-0.556029		-1.73853	0.679783	-0.00363356
4.5e-09	0.873619	0.85048	0.66622	0.622442	0.536022		4.5e-09	-0.918956		-2.3869	1.78836	0.609505
4.525e-09	0.859387	0.8503	0.660933	0.612549	0.527202		4.525e-09	-0.954132		-2.42056	1.1172	0.163924
4.55e-09	0.836048	0.827753	0.660398	0.597371	0.52195		4.55e-09	-0.96573		-1.76343	-0.412595	0.29196
4.575e-09	0.854454	0.863648	0.651764	0.591815	0.519728		4.575e-09	-0.306469		-2.32822	-0.460059	0.910392
4.6e-09	0.874757	0.836772	0.644736	0.586936	0.517843		4.6e-09	-0.852687		-2.6759	-0.418583	1.56628
4.625e-09	0.840033	0.853006	0.644401	0.590324	0.501751		4.625e-09	-1.92613		-2.02948	0.926355	-0.241029
4.65e-09	0.860146	0.86491	0.647882	0.572029	0.505117		4.65e-09	-0.792762		-0.808142	-1.18905	1.2737
4.675e-09	0.850659	0.834246	0.639984	0.58287	0.485524		4.675e-09	-1.53105		-1.30613	1.33369	-1.1901
4.7e-09	0.848571	0.842544	0.636236	0.586326	0.4831		4.7e-09	-1.43166		-1.17764	2.68602	-0.688604
4.725e-09	0.853315	0.848857	0.637842	0.549261	0.481821		4.725e-09	-1.33421		-0.246036	-2.50889	0.0127184
4.75e-09	0.829786	0.82631	0.625527	0.561052	0.477309		4.75e-09	-2.44422		-1.4498	0.163047	0.133219
4.775e-09	0.822575	0.832803	0.612409	0.559019	0.471519		4.775e-09	-1.65662		-2.79254	0.592518	0.00677976
4.8e-09	0.83453	0.837313	0.631818	0.552582	0.474616		4.8e-09	0.439859		0.867184	0.29522	1.44295
4.825e-09	0.808344	0.835509	0.605515	0.550413	0.461689		4.825e-09	-0.840641		-2.5443	0.677388	-0.00019795
4.85e-09	0.817073	0.829917	0.609129	0.544112	0.454215		4.85e-09	-2.8977		-1.3342	0.362875	-0.492156
4.875e-09	0.827509	0.808813	0.609799	0.534896	0.440075		4.875e-09	-1.62296		-0.585304	-0.447151	-2.21225
4.9e-09	0.810621	0.816209	0.605381	0.535032	0.440883		4.9e-09	-2.05482		-0.63544	0.288053	-1.24665
4.925e-09	0.819729	0.813683	0.612074	0.526833	0.448626		4.925e-09	-1.94462		1.05302	-0.373909	0.988516
4.95e-09	0.791836	0.805386	0.600294	0.530763	0.438055		4.95e-09	-2.93325		-0.166939	0.981355	-0.121862
4.975e-09	0.807585	0.806829	0.593334	0.518634	0.440681		4.975e-09	-2.154		-0.647431	-0.358867	1.18217
5e-09	0.797718	0.808993	0.594739	0.525071	0.420684		5e-09	-1.54347		0.182289	1.41453	-1.72665
5.025e-09	0.806447	0.793842	0.579546	0.502101	0.422771		5.025e-09	-3.04039		-1.62437	-1.79947	-0.552012
5.05e-09	0.785005	0.80268	0.585436	0.516737	0.421021		5.05e-09	-2.16236		-0.0833906	1.35319	-0.104997
5.075e-09	0.801703	0.79312	0.582357	0.503252	0.422233		5.075e-09	-1.46325		0.0211527	-0.293981	0.889595
5.1e-09	0.807206	0.774902	0.576534	0.501491	0.415904		5.1e-09	-0.93489		-0.325308	0.0526401	0.455068
5.125e-09	0.776845	0.805386	0.580416	0.490378	0.404188		5.125e-09	-4.46351		0.886532	-1.21563	-1.02549
5.15e-09	0.789369	0.801418	0.569774	0.500949	0.399946		5.15e-09	-2.79987		-0.250675	1.24943	-1.10114
5.175e-09	0.790887	0.786085	0.562078	0.489701	0.391799		5.175e-09	-2.37388		-0.920667	-0.0564415	-1.9354
5.2e-09	0.793354	0.770934	0.571113	0.494782	0.396176		5.2e-09	-1.3481		1.12838	1.46017	-0.365217
5.225e-09	0.78045	0.786807	0.561944	0.47913	0.394425		5.225e-09	-2.27003		0.212669	-0.643797	0.0277691
5.25e-09	0.773619	0.784462	0.55853	0.484144	0.393213		5.25e-09	-0.213724		0.222236	0.859618	0.520545
5.275e-09	0.796579	0.779411	0.537916	0.475471	0.394627		5.275e-09	-0.936695		-2.60187	-0.0476995	1.5147
5.3e-09	0.792215	0.787709	0.554849	0.45765	0.383719		5.3e-09	-1.56274		0.736218	-2.59259	0.0762877
5.325e-09	0.773619	0.770032	0.546483	0.474658	0.378468		5.325e-09	-2.68771		-0.0927687	1.00915	-0.273965
5.35e-09	0.777984	0.774902	0.546483	0.468424	0.369243		5.35e-09	-2.02588		0.453407	0.492954	-1.42986
5.375e-09	0.759957	0.760472	0.531557	0.453449	0.356989		5.375e-09	-2.14615		-1.4852	-1.59508	-3.20879
5.4e-09	0.774568	0.760111	0.545278	0.452026	0.362712		5.4e-09	-1.49699		1.33605	-1.27306	-1.41109
5.425e-09	0.769255	0.761734	0.526538	0.45643	0.369109		5.425e-09	-3.83866		-1.25716	0.0962076	0.534556
5.45e-09	0.785764	0.766064	0.523392	0.447147	0.36049		5.45e-09	-3.41095		-1.25527	-1.00462	-0.540551
5.475e-09	0.757111	0.762095	0.519778	0.454059	0.350727		5.475e-09	-2.3709		-1.33843	0.8173	-1.86586
5.5e-09	0.755213	0.748747	0.52212	0.447283	0.357258		5.5e-09	-0.756667		-0.417984	0.158596	0.11078
5.525e-09	0.737187	0.7547	0.52212	0.442675	0.350862		5.525e-09	-0.892121		0.10329	-0.119482	-0.558039
5.55e-09	0.761665	0.767326	0.513754	0.432714	0.344533		5.55e-09	-2.61032		-0.801018	-1.39018	-1.23298
5.575e-09	0.758819	0.743336	0.509471	0.431563	0.338608		5.575e-09	-0.830025		-1.02305	-1.06086	-1.84301
5.6e-09	0.730546	0.755061	0.503447	0.446334	0.343927		5.6e-09	-2.07172		-1.54954	2.19785	-0.134329
5.625e-09	0.724094	0.762817	0.496152	0.435154	0.331269		5.625e-09	-2.30409		-2.30151	0.672952	-2.16739
5.65e-09	0.716125	0.71664	0.504049	0.421466	0.334096		5.65e-09	-1.47799		-0.452474	-1.33197	-0.98152
5.675e-09	0.774758	0.737023	0.494746	0.431766	0.324805		5.675e-09	-2.68863		-1.55808	1.1117	-2.33905
5.7e-09	0.758439	0.765162	0.501171	0.421805	0.327633		5.7e-09	-0.414627		0.0432928	-0.216555	-1.15408
5.725e-09	0.761665	0.733956	0.494144	0.419569	0.332211		5.725e-09	-2.20812		-0.680331	-0.111001	0.40553
5.75e-09	0.747623	0.751453	0.497825	0.411844	0.321304		5.75e-09	-1.17447		0.446214	-1.04385	-1.32869
5.775e-09	0.738705	0.731792	0.498159	0.414352	0.322785		5.775e-09	-2.94713		0.989316	-0.0613901	-0.439905
5.8e-09	0.751039	0.719707	0.484037	0.410896	0.322246		5.8e-09	-3.44612		-0.996867	-0.210175	0.0104481
5.825e-09	0.740223	0.737384	0.481628	0.40927	0.319014		5.825e-09	-1.96456		-0.949091	-0.0206861	-0.127126
5.85e-09	0.748003	0.739187	0.487451	0.416655	0.311204		5.85e-09	-2.06265		0.539602	1.87986	-1.26583
5.875e-09	0.720868	0.724036	0.476006	0.403849	0.317129		5.875e-09	-3.3596		-1.00865	-0.0710049	0.564099
5.9e-09	0.74269	0.709064	0.48725	0.4132	0.314301		5.9e-09	-3.6288		1.43822	2.20898	0.493671
5.925e-09	0.733012	0.732153	0.477612	0.398225	0.298209		5.925e-09	-1.55943		0.198157	-0.177278	-2.48708
5.95e-09	0.709673	0.729808	0.481092	0.405814	0.303797		5.95e-09	-2.20565		1.27792	1.77056	-0.728208
5.975e-09	0.716694	0.713033	0.477813	0.403307	0.294102		5.975e-09	-1.07855		1.1564	1.77273	-2.33554
6e-09	0.706637	0.70708	0.475738	0.393753	0.307164		6e-09	-2.99484		1.24429	0.400858	1.08082
6.025e-09	0.716504	0.723314	0.469982	0.391991	0.295314		6.025e-09	-1.89721		0.667628	0.530032	-1.02966
6.05e-09	0.703791	0.694454	0.457533	0.39233	0.299758		6.05e-09	-1.65905		-1.11975	1.06233	0.472806
6.075e-09	0.707396	0.718805	0.469781	0.399648	0.295718		6.075e-09	-0.860406		1.52234	2.95804	0.0749142
6.1e-09	0.717453	0.7262	0.461883	0.375119	0.292351		6.1e-09	-1.83609		0.538718	-1.39838	-0.182314
6.125e-09	0.717643	0.717542	0.461883	0.384944	0.296997		6.125e-09	-1.23574		0.97518	0.985132	1.36269
6.15e-09	0.710811	0.725118	0.459541	0.377964	0.286695		6.15e-09	1.25245		0.986267	0.0577485	-0.475086
6.175e-09	0.725233	0.698783	0.45084	0.3657	0.278885		6.175e-09	-0.614073		-0.161231	-1.92587	-1.7634
6.2e-09	0.73453	0.728545	0.440734	0.372747	0.285147		6.2e-09	-1.41884		-1.57339	-0.0838044	0.150116
6.225e-09	0.703601	0.709245	0.44843	0.370172	0.27599		6.225e-09	-0.147082		0.258743	-0.153634	-1.46315
6.25e-09	0.690128	0.71177	0.457801	0.372408	0.276192		6.25e-09	-1.59896		2.40278	0.733258	-0.941075
6.275e-09	0.708155	0.6977	0.449033	0.368952	0.282656		6.275e-09	-1.38366		1.21933	0.476674	1.0229
6.3e-09	0.687662	0.714836	0.436584	0.364616	0.278683		6.3e-09	-2.62813		-0.654046	0.0343908	0.572058
6.325e-09	0.694303	0.698963	0.44997	0.350183	0.273499		6.325e-09	-1.89196		2.23013	-2.45421	-0.172438
6.35e-09	0.694113	0.724937	0.438525	0.348421	0.272219		6.35e-09	-2.54196		0.526636	-2.39762	-0.0170615
6.375e-09	0.689559	0.699685	0.434174	0.359737	0.265284		6.375e-09	-2.37732		0.128503	0.309873	-1.19144
6.4e-09	0.6814	0.685796	0.442541	0.361973	0.261312		6.4e-09	-1.28618		2.09281	1.18168	-1.68136
6.425e-09	0.696201	0.686156	0.428218	0.361499	0.263736		6.425e-09	-3.87867		-0.168635	1.50279	-0.668188
6.45e-09	0.695821	0.700947	0.4321	0.357704	0.263332		6.45e-09	-1.26953		0.961945	1.14352	-0.320983
6.475e-09	0.685385	0.710147	0.428084	0.353842	0.259898		6.475e-09	-1.5269		0.614305	0.764973	-0.695917
6.5e-09	0.69677	0.681827	0.421592	0.343949	0.264207		6.5e-09	-1.28805		-0.204586	-0.862089	0.767486
6.525e-09	0.687282	0.699685	0.420588	0.347337	0.258618		6.525e-09	-1.51646		0.00213213	0.237926	-0.135872
6.55e-09	0.677984	0.682909	0.419651	0.334395	0.258416		6.55e-09	-0.903616		0.217609	-2.04308	0.24036
6.575e-09	0.692595	0.671005	0.415233	0.341103	0.246835		6.575e-09	-0.555342		-0.229512	-0.262341	-2.13064
6.6e-09	0.654645	0.680925	0.409879	0.344762	0.251212		6.6e-09	-1.89728		-0.860314	0.888967	-0.664628
6.625e-09	0.667548	0.675875	0.416906	0.341442	0.249933		6.625e-09	-1.61474		0.859865	0.586152	-0.56566
6.65e-09	0.68918	0.674973	0.413962	0.337241	0.253771		6.65e-09	-0.532431		0.683469	0.094674	0.776257
6.675e-09	0.657112	0.685796	0.415166	0.341916	0.235322		6.675e-09	-0.171479		1.29815	1.46163	-3.31963
6.7e-09	0.683677	0.683631	0.404658	0.336834	0.239496		6.7e-09	-0.739522		-0.331822	0.780153	-1.90117
6.725e-09	0.660717	0.656574	0.408607	0.328229	0.243671		6.725e-09	-1.76742		0.806497	-0.65162	-0.476989
6.75e-09	0.674	0.677859	0.412958	0.329652	0.237207		6.75e-09	-0.90437		2.02425	0.0269636	-1.67339
6.775e-09	0.65844	0.672087	0.397028	0.324705	0.243536		6.775e-09	-2.5219		-0.673271	-0.647544	0.282284
6.8e-09	0.652178	0.677679	0.399639	0.321385	0.23788		6.8e-09	0.035879		0.201213	-0.985036	-0.732564
6.825e-09	0.659958	0.658559	0.396359	0.330939	0.237678		6.825e-09	-0.349312		-0.0671247	1.41733	-0.401609
6.85e-09	0.680261	0.667397	0.401379	0.330871	0.236803		6.85e-09	-0.768458		1.27453	1.77042	-0.242043
6.875e-09	0.662425	0.670644	0.391005	0.325722	0.235053		6.875e-09	-0.999354		-0.381599	1.03247	-0.304953
6.9e-09	0.654835	0.650442	0.38893	0.315558	0.235322		6.9e-09	0.0259357		-0.425384	-0.789778	0.136699
6.925e-09	0.662235	0.656214	0.394016	0.319149	0.235457		6.925e-09	-0.606159		0.932092	0.341835	0.544659
6.95e-09	0.662804	0.650081	0.395154	0.310272	0.23687		6.95e-09	-0.714085		1.51888	-1.21734	1.27647
6.975e-09	0.655594	0.67858	0.385115	0.324841	0.232023		6.975e-09	-1.92705		-0.094018	2.2934	0.419617
7e-09	0.653317	0.660543	0.386386	0.316235	0.228521		7e-09	-1.34989		0.514119	0.783761	-0.104417
7.025e-09	0.645916	0.653147	0.383241	0.316032	0.228791		7.025e-09	-0.338435		0.247663	1.09191	0.325714
7.05e-09	0.655594	0.646654	0.38652	0.307562	0.220576		7.05e-09	-0.899107		1.24968	-0.408543	-1.42192
7.075e-09	0.645347	0.658198	0.375945	0.314948	0.219028		7.075e-09	-1.99303		-0.500026	1.55061	-1.47231
7.1e-09	0.670774	0.649179	0.381233	0.300176	0.215392		7.1e-09	-2.63992		0.898288	-1.34735	-2.06575
7.125e-09	0.641931	0.643226	0.390335	0.305055	0.221519		7.125e-09	-2.77361		3.06232	0.0614292	-0.141436
7.15e-09	0.663184	0.654229	0.366709	0.305123	0.222933		7.15e-09	-0.614579		-1.31338	0.413952	0.569193
7.175e-09	0.642311	0.657837	0.369922	0.310611	0.214719		7.175e-09	0.287121		-0.328732	1.96546	-1.22311
7.2e-09	0.628839	0.655672	0.377686	0.302954	0.218085		7.2e-09	-1.74265		1.57372	0.608491	-0.00637525
7.225e-09	0.636429	0.628435	0.363429	0.298482	0.216469		7.225e-09	-0.322695		-0.953065	-0.0497482	-0.089361
7.25e-09	0.672861	0.648277	0.36517	0.302073	0.21694		7.25e-09	0.808114		-0.264445	1.0822	0.370884
7.275e-09	0.655973	0.647375	0.366307	0.301599	0.214382		7.275e-09	-0.434146		0.301966	1.30745	0.0308992
7.3e-09	0.62751	0.656214	0.360485	0.302141	0.211015		7.3e-09	-1.20782		-0.544516	1.75709	-0.529887
7.325e-09	0.630736	0.632043	0.353122	0.293265	0.208053		7.325e-09	-1.00524		-1.71101	0.0907546	-0.991896
7.35e-09	0.649332	0.623024	0.36276	0.287031	0.214651		7.35e-09	0.422518		0.578348	-0.992194	1.07847
7.375e-09	0.631495	0.618334	0.361422	0.293468	0.213911		7.375e-09	0.0366957		0.634538	0.775465	1.20295
7.4e-09	0.634911	0.639799	0.348236	0.290622	0.207783		7.4e-09	-1.74433		-1.7351	0.450757	-0.112901
7.425e-09	0.629028	0.639619	0.355666	0.291909	0.210881		7.425e-09	-2.08755		0.111696	1.0599	1.03247
7.45e-09	0.626941	0.641242	0.357473	0.286421	0.199838		7.45e-09	-0.510325		0.809653	0.130812	-1.61556
7.475e-09	0.634721	0.616891	0.351516	0.287573	0.205427		7.475e-09	-2.53286		-0.0907685	0.707649	0.198533
7.5e-09	0.624664	0.637274	0.351047	0.285405	0.202532		7.5e-09	-0.162479		0.135488	0.526232	-0.272493
7.525e-09	0.632823	0.633306	0.348705	0.290215	0.201858		7.525e-09	-3.08207		-0.0282503	1.93753	-0.148914
7.55e-09	0.630167	0.627714	0.350044	0.285879	0.204888		7.55e-09	-0.822513		0.567501	1.25312	0.97642
7.575e-09	0.618592	0.637454	0.348772	0.278493	0.200848		7.575e-09	-0.74113		0.620307	-0.139167	0.177911
7.6e-09	0.610433	0.61148	0.35011	0.278764	0.202868		7.6e-09	-1.37274		1.21472	0.224002	1.02644
7.625e-09	0.600186	0.602281	0.343417	0.281678	0.198694		7.625e-09	-1.82475		0.13307	1.19723	0.180406
7.65e-09	0.624095	0.630059	0.349776	0.280255	0.194587		7.65e-09	-1.41546		1.77601	1.16912	-0.653852
7.675e-09	0.600376	0.632404	0.354996	0.273343	0.196405		7.675e-09	-1.18919		3.18636	-0.134419	0.137065
7.7e-09	0.625233	0.614907	0.339268	0.265822	0.194048		7.7e-09	-0.413645		0.199218	-1.58733	-0.221996
7.725e-09	0.621818	0.618875	0.330165	0.275986	0.195597		7.725e-09	0.463288		-1.4072	1.07532	0.49575
7.75e-09	0.630926	0.615629	0.327153	0.278696	0.192567		7.75e-09	-0.879106		-1.73748	2.00549	-0.0568052
7.775e-09	0.619351	0.616711	0.327756	0.277273	0.191422		7.775e-09	-1.03825		-1.30757	1.96821	-0.091742
7.8e-09	0.617453	0.641603	0.331638	0.263789	0.190951		7.8e-09	-1.96849		-0.183621	-0.904989	0.0567208
7.825e-09	0.615746	0.59705	0.3305	0.269278	0.189806		7.825e-09	-0.587948		-0.123916	0.67091	0.0136889
7.85e-09	0.594873	0.605167	0.329764	0.265077	0.188729		7.85e-09	-1.33679		0.0193425	-0.0342635	-0.0138865
7.875e-09	0.592406	0.588572	0.320661	0.269549	0.189469		7.875e-09	-2.30725		-1.62335	1.30596	0.467155
7.9e-09	0.623336	0.623205	0.330165	0.263383	0.193307		7.9e-09	0.455615		0.703634	0.129934	1.82201
7.925e-09	0.623525	0.592901	0.329362	0.259317	0.186776		7.925e-09	-0.753298		0.831119	-0.553755	0.251388
7.95e-09	0.590888	0.601018	0.319457	0.262773	0.178023		7.95e-09	-1.39245		-0.996384	0.548533	-1.95855
7.975e-09	0.611571	0.604445	0.323941	0.262231	0.189133		7.975e-09	0.889686		0.262996	0.700354	1.46141
8e-09	0.603791	0.600116	0.325012	0.258165	0.184285		8e-09	-1.62856		0.789523	0.00793539	0.350578
8.025e-09	0.572862	0.622483	0.32722	0.25742	0.180851		8.025e-09	-0.104204		1.56146	0.105031	-0.365802
8.05e-09	0.597529	0.590556	0.320795	0.260198	0.179908		8.05e-09	-1.42656		0.464272	1.04566	-0.376423
8.075e-09	0.585575	0.597952	0.315508	0.257284	0.178023		8.075e-09	-0.952161		-0.393159	0.617572	-0.661084
8.1e-09	0.592406	0.610398	0.316177	0.257216	0.176879		8.1e-09	-0.477305		0.0390612	0.871809	-0.736917
8.125e-09	0.608156	0.59723	0.317917	0.253625	0.176542		8.125e-09	0.116976		0.704864	0.273522	-0.582287
8.15e-09	0.590888	0.590917	0.309752	0.255455	0.179504		8.15e-09	-0.345684		-0.790694	0.984676	0.525272
8.175e-09	0.602463	0.597952	0.311224	0.240683	0.180447		8.175e-09	0.640894		-0.184648	-2.33329	1.05149
8.2e-09	0.590698	0.603904	0.313634	0.255319	0.176542		8.2e-09	0.0219319		0.628339	1.4896	0.170456
8.225e-09	0.590888	0.604626	0.316445	0.25166	0.176811		8.225e-09	0.0683836		1.53151	0.865733	0.499051
8.25e-09	0.577416	0.595066	0.30674	0.249289	0.175734		8.25e-09	0.183013		-0.319374	0.551603	0.433475
8.275e-09	0.574949	0.596689	0.306137	0.241293	0.174926		8.275e-09	-0.114379		-0.172075	-1.14429	0.443119
8.3e-09	0.595252	0.619236	0.304799	0.240954	0.170482		8.3e-09	-0.876912		-0.189525	-0.970781	-0.617212
8.325e-09	0.598099	0.599395	0.303862	0.237431	0.175734		8.325e-09	-1.26334		-0.120407	-1.58252	1.16531
8.35e-09	0.60474	0.595787	0.30935	0.246714	0.163682		8.35e-09	-0.772806		1.37353	0.95822	-2.14652
8.375e-09	0.571723	0.576667	0.301787	0.241361	0.175869		8.375e-09	-1.05828		-0.0311902	-0.107717	1.68516
8.4e-09	0.582919	0.581537	0.300382	0.234585	0.165702		8.4e-09	-1.44917		-0.0702175	-1.53171	-1.08622
8.425e-09	0.594683	0.590015	0.307141	0.242716	0.16725		8.425e-09	-2.11871		1.71353	0.735777	-0.394405
8.45e-09	0.57438	0.579192	0.301051	0.24258	0.167654		8.45e-09	-0.574313		0.62738	0.956517	-0.0411208
8.475e-09	0.587852	0.566025	0.295563	0.23533	0.169539		8.475e-09	-0.188294		-0.329471	-0.595937	0.753899
8.5e-09	0.581211	0.583521	0.292818	0.234381	0.161729		8.5e-09	1.55221		-0.675418	-0.583533	-1.34777
8.525e-09	0.580072	0.55881	0.305803	0.235669	0.16927		8.525e-09	-1.84798		2.51688	-0.0141015	1.13706
8.55e-09	0.582919	0.56837	0.294626	0.236075	0.161325		8.55e-09	0.207311		0.267657	0.334229	-1.01986
8.575e-09	0.576277	0.575946	0.290141	0.234178	0.166577		8.575e-09	-1.44406		-0.479522	0.102809	0.782304
8.6e-09	0.563374	0.572338	0.288133	0.232891	0.159911		8.6e-09	0.685467		-0.670401	0.0220507	-1.0044
8.625e-09	0.569636	0.578832	0.295295	0.233907	0.160652		8.625e-09	0.0770003		1.21815	0.520733	-0.561873
8.65e-09	0.591837	0.577028	0.297236	0.228486	0.164153		8.65e-09	0.795173		1.92574	-0.607099	0.71773
8.675e-09	0.584247	0.569632	0.288334	0.236143	0.160046		8.675e-09	1.65427		0.164031	1.57264	-0.308437
8.7e-09	0.572862	0.583702	0.294291	0.235194	0.158026		8.7e-09	-2.09612		1.78769	1.57579	-0.705059
8.725e-09	0.584247	0.548889	0.283783	0.229909	0.16449		8.725e-09	0.462805		-0.351144	0.474451	1.48282
8.75e-09	0.552368	0.559351	0.291814	0.232145	0.156073		8.75e-09	1.51613		1.75071	1.28403	-0.870588
8.775e-09	0.552179	0.557727	0.283917	0.227199	0.159238		8.775e-09	0.600941		0.199019	0.259903	0.31111
8.8e-09	0.590319	0.580275	0.284385	0.22415	0.157757		8.8e-09	-0.96866		0.564871	-0.285198	0.0687534
8.825e-09	0.553886	0.557727	0.291078	0.228622	0.163682		8.825e-09	-0.725751		2.36589	1.09438	2.10191
8.85e-09	0.581401	0.558269	0.281373	0.224692	0.153447		8.85e-09	0.2235		0.382579	0.318462	-0.84144
8.875e-09	0.582349	0.558629	0.282846	0.216086	0.155063		8.875e-09	0.184016		0.978521	-1.66592	-0.136819
8.9e-09	0.570585	0.570174	0.276354	0.222049	0.155467		8.9e-09	0.444442		-0.272181	0.0997358	0.194283
8.925e-09	0.553507	0.567468	0.27535	0.21778	0.152909		8.925e-09	2.03393		-0.252695	-0.77372	-0.39367
8.95e-09	0.564702	0.551414	0.284519	0.219474	0.152774		8.95e-09	-1.3777		2.13582	-0.106773	-0.231211
8.975e-09	0.560907	0.545101	0.268858	0.221371	0.154121		8.975e-09	1.36695		-1.263	0.614451	0.392339
9e-09	0.554835	0.569993	0.265913	0.22808	0.152707		9e-09	0.186626		-1.70293	2.58825	0.154339
9.025e-09	0.546296	0.552677	0.271133	0.225098	0.149879		9.025e-09	-1.12151		-0.233283	2.04237	-0.529647
9.05e-09	0.551799	0.559351	0.274547	0.221846	0.155535		9.05e-09	0.0274859		0.815754	1.4213	1.44224
9.075e-09	0.559769	0.55917	0.275751	0.215883	0.145906		9.075e-09	0.482589		1.34743	0.0865653	-1.38429
9.1e-09	0.556163	0.557186	0.272673	0.209785	0.154053		9.1e-09	0.687933		0.870074	-1.29058	1.37468
9.125e-09	0.540604	0.55394	0.275082	0.214528	0.147994		9.125e-09	0.731892		1.68568	0.173585	-0.340623
9.15e-09	0.546296	0.555202	0.264775	0.220491	0.14833		9.15e-09	0.613824		-0.505189	1.96358	-0.0409456
9.175e-09	0.536999	0.550873	0.26685	0.215138	0.146916		9.175e-09	-0.0434349		0.229906	0.775596	-0.295759
9.2e-09	0.545158	0.559531	0.278763	0.210936	0.146445		9.2e-09	1.95474		3.30387	-0.11348	-0.253139
9.225e-09	0.530737	0.54925	0.260759	0.205448	0.151158		9.225e-09	-0.681325		-0.730952	-1.34799	1.43842
9.25e-09	0.55882	0.55394	0.258416	0.207955	0.14658		9.25e-09	2.16581		-1.04871	-0.467853	0.172071
9.275e-09	0.541553	0.545642	0.256074	0.21053	0.151225		9.275e-09	0.02767		-1.36956	0.43177	1.84605
9.3e-09	0.540604	0.527244	0.261161	0.209852	0.142405		9.3e-09	-0.654426		0.0845689	0.466688	-0.78725
9.325e-09	0.541173	0.553038	0.261629	0.209242	0.13951		9.325e-09	0.016165		0.435026	0.51799	-1.53216
9.35e-09	0.540604	0.547987	0.266113	0.210259	0.140856		9.35e-09	1.57383		1.75023	1.00273	-0.91805
9.375e-09	0.550471	0.538427	0.257479	0.204025	0.14557		9.375e-09	0.436752		-0.0884797	-0.45376	0.781646
9.4e-09	0.529598	0.528687	0.254401	0.204025	0.147388		9.4e-09	-1.51945		-0.59527	-0.243811	1.55267
9.425e-09	0.531306	0.514617	0.26096	0.204838	0.136951		9.425e-09	0.00315793		1.22416	0.184857	-1.63696
9.45e-09	0.526183	0.543478	0.252928	0.210462	0.14025		9.45e-09	0.0207423		-0.482581	1.91042	-0.389295
9.475e-09	0.554076	0.548889	0.253731	0.199892	0.139039		9.475e-09	2.20224		-0.0539326	-0.729329	-0.602429
9.5e-09	0.53586	0.541674	0.2542	0.209988	0.140183		9.5e-09	-0.546251		0.293564	2.20796	-0.0513168
9.525e-09	0.541932	0.532294	0.255405	0.200163	0.138163		9.525e-09	1.05558		0.819856	-0.242662	-0.531452
9.55e-09	0.530926	0.543478	0.247708	0.199824	0.136682		9.55e-09	-0.22282		-0.825163	-0.12949	-0.839555
9.575e-09	0.545158	0.539329	0.256676	0.200027	0.141058		9.575e-09	-0.061073		1.59491	0.129839	0.766063
9.6e-09	0.527131	0.543478	0.251389	0.203754	0.142607		9.6e-09	-0.521457		0.532097	1.34877	1.44925
9.625e-09	0.526752	0.526703	0.247775	0.203754	0.140654		9.625e-09	-0.0679596		-0.12528	1.5539	0.983868
9.65e-09	0.536809	0.538788	0.247908	0.199282	0.139846		9.65e-09	0.05576		0.13523	0.535933	0.8925
9.675e-09	0.548384	0.528867	0.249782	0.19027	0.134595		9.675e-09	1.2436		0.82453	-1.7304	-0.665178
9.7e-09	0.512331	0.538427	0.247908	0.200569	0.134729		9.7e-09	-0.194192		0.591093	1.29521	-0.45011
9.725e-09	0.499238	0.526161	0.243692	0.195419	0.133113		9.725e-09	-0.145611		-0.223166	0.082384	-0.814619
9.75e-09	0.522577	0.519668	0.253062	0.190066	0.133652		9.75e-09	-0.447201		2.32244	-1.19233	-0.467428
9.775e-09	0.523716	0.524538	0.240948	0.184578	0.138163		9.775e-09	1.81307		-0.45394	-2.51089	1.19914
9.8e-09	0.524854	0.543117	0.237467	0.195419	0.136278		9.8e-09	-0.407205		-1.09654	0.680096	0.741036
9.825e-09	0.519352	0.53013	0.242554	0.188643	0.134123		9.825e-09	2.19019		0.390064	-0.999886	0.189731
9.85e-09	0.522198	0.522915	0.241684	0.191828	0.138298		9.85e-09	0.371442		0.394947	0.0774771	1.74952
9.875e-09	0.509674	0.528146	0.23633	0.192574	0.125236		9.875e-09	1.28894		-0.721833	0.479466	-2.45528
9.9e-09	0.516316	0.532655	0.234522	0.188169	0.136211		9.9e-09	0.89132		-0.955339	-0.552482	1.3839
9.925e-09	0.52087	0.520389	0.233251	0.191693	0.132777		9.925e-09	-0.194668		-1.05603	0.623845	0.396016
9.95e-09	0.496012	0.512092	0.231912	0.18783	0.131295		9.95e-09	-0.0386445		-1.17457	-0.261306	0.0609946
9.975e-09	0.523906	0.525981	0.239074	0.181529	0.130891		9.975e-09	1.32644		0.845555	-1.83389	0.087088
1e-08	0.511761	0.523816	0.240278	0.194742	0.129949		1e-08	0.664281		1.36937	2.06306	-0.0699562
1.0025e-08	0.510623	0.516601	0.236396	0.184984	0.128468		1.0025e-08	0.895289		0.608145	-0.485427	-0.411455
1.005e-08	0.506069	0.520209	0.236196	0.184849	0.126717		1.005e-08	1.76113		0.774368	-0.334762	-0.847161
1.0075e-08	0.48254	0.52057	0.23566	0.187898	0.1385		1.0075e-08	1.41403		0.854827	0.713588	3.31054
1.01e-08	0.502464	0.510829	0.232448	0.182884	0.126515		1.01e-08	2.28151		0.254162	-0.514753	-0.604981
1.0125e-08	0.508346	0.509026	0.231377	0.1818	0.126582		1.0125e-08	1.01547		0.19554	-0.635535	-0.427435
1.015e-08	0.51252	0.513174	0.231778	0.18119	0.129747		1.015e-08	1.13317		0.511459	-0.622892	0.807593
1.0175e-08	0.507587	0.504696	0.240613	0.190337	0.130622		1.0175e-08	-0.138283		2.9823	2.1622	1.26335
1.02e-08	0.503792	0.54005	0.230707	0.194742	0.127256		1.02e-08	-0.360971		0.665302	3.6063	0.266529
1.0225e-08	0.517075	0.493693	0.234188	0.180445	0.122542		1.0225e-08	1.82279		1.77108	-0.279181	-1.19694
1.025e-08	0.505879	0.514256	0.227629	0.182613	0.128939		1.025e-08	0.3207		0.30089	0.524829	1.15378
1.0275e-08	0.513849	0.485757	0.230172	0.178751	0.127794		1.0275e-08	-0.280181		1.16616	-0.395917	0.913443
1.03e-08	0.500566	0.503795	0.224416	0.169806	0.126784		1.03e-08	-0.863738		-0.106499	-2.77866	0.717197
1.0325e-08	0.498479	0.51101	0.22455	0.174143	0.12362		1.0325e-08	1.1767		0.135909	-1.35631	-0.225973
1.035e-08	0.489181	0.505779	0.221806	0.180648	0.1284		1.035e-08	0.725029		-0.366526	0.693884	1.57784
1.0375e-08	0.500756	0.500007	0.223613	0.178412	0.123485		1.0375e-08	1.38861		0.307937	0.230782	0.0235821
1.04e-08	0.491458	0.496038	0.220869	0.182952	0.126448		1.04e-08	-0.16423		-0.197558	1.72205	1.20079
1.0425e-08	0.495443	0.526522	0.231912	0.167028	0.127188		1.0425e-08	1.42807		2.88083	-2.70146	1.60807
1.045e-08	0.513659	0.503614	0.219999	0.180716	0.122744		1.045e-08	0.535461		-0.0123514	1.4396	0.208362
1.0475e-08	0.493356	0.485576	0.21953	0.178073	0.123956		1.0475e-08	-0.530554		0.070887	0.854011	0.778652
1.05e-08	0.499997	0.495317	0.223814	0.174956	0.122475		1.05e-08	1.04618		1.39596	0.127327	0.407468
1.0525e-08	0.501325	0.506139	0.218325	0.175227	0.123552		1.0525e-08	1.3496		0.164355	0.383663	0.930449
1.055e-08	0.484058	0.504877	0.21605	0.166486	0.114059		1.055e-08	0.795202		-0.229996	-1.99039	-2.25756
1.0575e-08	0.489181	0.497121	0.217321	0.178479	0.119917		1.0575e-08	0.697525		0.305519	1.68716	-0.0587486
1.06e-08	0.488232	0.496579	0.21518	0.174956	0.118907		1.06e-08	2.01349		-0.0571516	0.832614	-0.272897
1.0625e-08	0.487663	0.478361	0.214644	0.171094	0.118099		1.0625e-08	-0.150454		0.00186715	-0.125073	-0.417285
1.065e-08	0.500376	0.502352	0.209424	0.172923	0.117291		1.065e-08	1.87481		-1.17785	0.585786	-0.562765
1.0675e-08	0.473242	0.509386	0.215447	0.166215	0.119243		1.0675e-08	0.586849		0.614887	-1.21443	0.268137
1.07e-08	0.501135	0.483412	0.214443	0.165673	0.11251		1.07e-08	-0.0517566		0.549385	-1.20328	-1.97897
1.0725e-08	0.471534	0.492431	0.214377	0.166486	0.11655		1.0725e-08	2.61254		0.731836	-0.792531	-0.407378
1.075e-08	0.494115	0.485576	0.215715	0.168519	0.12234		1.075e-08	0.877759		1.28794	-0.0205205	1.79138
1.0775e-08	0.491648	0.488643	0.211699	0.171975	0.118301		1.0775e-08	0.871904		0.416899	1.17458	0.492576
1.08e-08	0.490509	0.486659	0.208554	0.167435	0.113991		1.08e-08	1.00073		-0.226212	-0.00135257	-0.907952
1.0825e-08	0.490699	0.470425	0.207884	0.173059	0.111163		1.0825e-08	-0.375356		-0.210205	1.84015	-1.78455
1.085e-08	0.475709	0.490627	0.213841	0.160455	0.114328		1.085e-08	0.949161		1.58096	-1.7429	-0.518664
1.0875e-08	0.481781	0.479444	0.207416	0.162624	0.117291		1.0875e-08	1.11585		0.0527645	-0.931031	0.678156
1.09e-08	0.476847	0.484494	0.206345	0.164792	0.113385		1.09e-08	2.34673		-0.0411174	-0.11698	-0.58949
1.0925e-08	0.486904	0.491349	0.208018	0.168315	0.118368		1.0925e-08	0.828516		0.603586	1.10513	1.3371
1.095e-08	0.469637	0.494595	0.209156	0.165199	0.10874		1.095e-08	0.334558		1.10547	0.339293	-1.99772
1.0975e-08	0.478555	0.488462	0.201258	0.165605	0.110894		1.0975e-08	0.790488		-0.834849	0.628744	-1.08936
1.1e-08	0.469067	0.488643	0.204404	0.158897	0.116213		1.1e-08	1.48029		0.20835	-1.22288	0.965574
1.1025e-08	0.47476	0.48738	0.206144	0.161946	0.112645		1.1025e-08	0.984616		0.872513	-0.140671	-0.193562
1.105e-08	0.486524	0.494054	0.200254	0.161133	0.117223		1.105e-08	2.06509		-0.536307	-0.222299	1.5984
1.1075e-08	0.48197	0.485035	0.20929	0.154357	0.113318		1.1075e-08	1.19813		2.1127	-2.10881	0.311968
1.11e-08	0.473432	0.485757	0.19838	0.155983	0.111163		1.11e-08	1.94862		-0.670203	-1.45703	-0.342245
1.1125e-08	0.476657	0.472228	0.197845	0.15788	0.111298		1.1125e-08	1.50856		-0.629019	-0.721528	-0.164634
1.115e-08	0.474191	0.474934	0.203333	0.165199	0.110154		1.115e-08	2.16201		1.06036	1.66363	-0.45409
1.1175e-08	0.484437	0.472228	0.197979	0.154425	0.106787		1.1175e-08	1.32867		-0.217588	-1.4522	-1.55747
1.12e-08	0.488042	0.475836	0.1949	0.162082	0.11352		1.12e-08	0.336428		-0.875495	1.04213	1.03465
1.1225e-08	0.468688	0.456716	0.203735	0.156051	0.111231		1.1225e-08	1.98962		1.74117	-0.63725	0.324352
1.125e-08	0.474191	0.467899	0.196573	0.159168	0.107326		1.125e-08	0.916898		-0.042503	0.476015	-0.982796
1.1275e-08	0.465082	0.479263	0.199987	0.158016	0.11049		1.1275e-08	0.372427		1.08576	0.283396	0.306757
1.13e-08	0.448195	0.470785	0.198916	0.159846	0.115809		1.13e-08	0.790631		0.976552	1.00428	2.39343
1.1325e-08	0.478555	0.476377	0.19905	0.158152	0.101198		1.1325e-08	-0.0903104		1.19952	0.642928	-2.87191
1.135e-08	0.477227	0.473852	0.192424	0.154831	0.11453		1.135e-08	-1.19026		-0.453409	-0.221398	2.17699
1.1375e-08	0.473432	0.468982	0.195235	0.160049	0.110086		1.1375e-08	-0.615658		0.510337	1.54487	0.658503
1.14e-08	0.470206	0.467539	0.201727	0.150291	0.106989		1.14e-08	3.81129		2.50172	-1.31128	-0.365716
1.1425e-08	0.466411	0.465194	0.190483	0.15639	0.1047		1.1425e-08	2.13697		-0.447198	0.730736	-1.09336
1.145e-08	0.448574	0.447517	0.187872	0.148259	0.107864		1.145e-08	0.419284		-0.994584	-1.63278	0.205288
1.1475e-08	0.470965	0.470425	0.193294	0.153408	0.10672		1.1475e-08	1.41205		0.703104	0.119787	-0.0981723
1.15e-08	0.447436	0.456355	0.192892	0.148123	0.104565		1.15e-08	1.67278		0.773313	-1.36869	-0.780214
1.1525e-08	0.455405	0.462849	0.193026	0.154967	0.109952		1.1525e-08	1.65592		0.99293	0.915913	1.35306
1.155e-08	0.461287	0.463931	0.188073	0.14731	0.104363		1.155e-08	1.71833		-0.218699	-1.31844	-0.616119
1.1575e-08	0.452749	0.464833	0.184191	0.151647	0.111971		1.1575e-08	1.14409		-1.13381	0.18787	2.3549
1.16e-08	0.453318	0.466096	0.189412	0.148868	0.109413		1.16e-08	1.68335		0.516038	-0.529289	1.51712
1.1625e-08	0.455974	0.460143	0.185463	0.151782	0.107999		1.1625e-08	1.40603		-0.421419	0.535494	1.10661
1.165e-08	0.463564	0.481969	0.186065	0.149072	0.0999865		1.165e-08	-0.468379		-0.0737779	-0.163255	-1.79029
1.1675e-08	0.441553	0.447697	0.184927	0.147039	0.10672		1.1675e-08	2.90512		-0.219012	-0.651479	0.864656
1.17e-08	0.458251	0.457438	0.187672	0.151376	0.104228		1.17e-08	0.347947		0.737766	0.865376	0.0432453
1.1725e-08	0.457113	0.463029	0.184927	0.157542	0.106518		1.1725e-08	0.586723		0.135115	2.96399	1.02714
1.175e-08	0.460339	0.466096	0.178234	0.150562	0.0993132		1.175e-08	0.264922		-1.59626	0.91294	-1.58318
1.1775e-08	0.442312	0.455273	0.183723	0.147716	0.10369		1.1775e-08	-0.799495		0.143971	0.163012	0.191516
1.18e-08	0.45142	0.470785	0.182652	0.147784	0.101266		1.18e-08	1.56551		0.0126673	0.333654	-0.613274
1.1825e-08	0.470585	0.461947	0.189679	0.149004	0.103555		1.1825e-08	1.72524		2.20025	0.86979	0.37213
1.185e-08	0.463564	0.445893	0.181045	0.143448	0.10571		1.185e-08	2.18654		-0.100561	-0.748933	1.30843
1.1875e-08	0.445538	0.44445	0.181782	0.148055	0.0986399		1.1875e-08	1.52115		0.28399	0.865407	-1.27335
1.19e-08	0.423906	0.465013	0.180309	0.144667	0.101468		1.19e-08	1.5591		0.0333137	-0.0674891	-0.080324
1.1925e-08	0.45142	0.431644	0.176226	0.139585	0.0999865		1.1925e-08	2.32266		-0.971507	-1.54524	-0.533475
1.195e-08	0.455974	0.466096	0.177431	0.137349	0.100256		1.195e-08	2.03763		-0.452513	-2.11689	-0.317269
1.1975e-08	0.457113	0.448058	0.175089	0.136197	0.103016		1.1975e-08	-0.268845		-0.958974	-2.34321	0.855434
1.2e-08	0.448384	0.441204	0.171675	0.141008	0.0959467		1.2e-08	1.93027		-1.77842	-0.65575	-1.74821
1.2025e-08	0.456923	0.456175	0.184258	0.14216	0.100929		1.2025e-08	2.27092		2.04295	-0.141038	0.27978
1.205e-08	0.435102	0.447517	0.177431	0.141618	0.0999192		1.205e-08	1.43671		0.230817	-0.171532	0.002396
1.2075e-08	0.452179	0.440302	0.174955	0.143177	0.0981013		1.2075e-08	1.04691		-0.320972	0.474861	-0.588536
1.21e-08	0.448384	0.4394	0.17616	0.143312	0.102478		1.21e-08	2.03669		0.198747	0.662612	1.21335
1.2125e-08	0.453128	0.44896	0.176494	0.146632	0.100323		1.2125e-08	2.5605		0.46524	1.88136	0.490954
1.215e-08	0.463375	0.456355	0.170537	0.144532	0.0978993		1.215e-08	1.53876		-1.10973	1.34588	-0.338328
1.2175e-08	0.440794	0.449862	0.171474	0.138772	0.104228		1.2175e-08	1.57347		-0.668775	-0.379874	2.22874
1.22e-08	0.439466	0.436694	0.174018	0.141821	0.0963507		1.22e-08	-0.369197		0.245017	0.753662	-0.721961
1.2225e-08	0.42903	0.446976	0.173349	0.132335	0.10167		1.2225e-08	1.9685		0.216046	-2.19337	1.45786
1.225e-08	0.438327	0.441384	0.172411	0.143854	0.0983706		1.225e-08	-0.917392		0.107238	1.70316	0.282145
1.2275e-08	0.430737	0.43489	0.166522	0.13701	0.102343		1.2275e-08	1.01506		-1.4649	-0.389704	1.94231
1.23e-08	0.434532	0.460865	0.172947	0.139518	0.10066		1.23e-08	2.50092		0.59778	0.570374	1.39435
1.2325e-08	0.428081	0.442466	0.170337	0.137756	0.0946001		1.2325e-08	1.63421		-0.00954567	0.133262	-0.86999
1.235e-08	0.420111	0.432906	0.170939	0.136672	0.0954754		1.235e-08	2.65149		0.3333	-0.0834489	-0.421308
1.2375e-08	0.425424	0.422264	0.172478	0.13369	0.0959467		1.2375e-08	1.70045		0.955049	-0.925209	-0.130493
1.24e-08	0.437379	0.437957	0.171073	0.135113	0.0958793		1.24e-08	1.44546		0.701983	-0.319547	-0.051069
1.2425e-08	0.423527	0.430561	0.171274	0.137485	0.100256		1.2425e-08	1.92964		0.926499	0.600538	1.77856
1.245e-08	0.44421	0.446795	0.168329	0.129489	0.0980339		1.245e-08	2.044		0.212157	-1.90154	1.01049
1.2475e-08	0.426373	0.438859	0.170738	0.134232	0.0964853		1.2475e-08	-0.272123		1.09611	-0.197257	0.5058
1.25e-08	0.41366	0.422985	0.170337	0.134571	0.0918395		1.25e-08	1.59228		1.14013	0.0521815	-1.2259
1.2525e-08	0.436999	0.422444	0.166722	0.131183	0.0943981		1.2525e-08	1.23138		0.219449	-0.935276	-0.109678
1.255e-08	0.430358	0.424789	0.168329	0.139653	0.0946001		1.255e-08	0.146717		0.863531	2.01458	0.0742299
1.2575e-08	0.425235	0.427495	0.16438	0.131048	0.0936574		1.2575e-08	0.42433		-0.16329	-0.711431	-0.196646
1.26e-08	0.432825	0.432185	0.16612	0.135723	0.0954754		1.26e-08	-0.518795		0.520922	0.981252	0.629098
1.2625e-08	0.42884	0.420099	0.164581	0.131454	0.0915028		1.2625e-08	2.43009		0.216464	-0.307872	-0.849454
1.265e-08	0.416506	0.438498	0.160096	0.131251	0.0924455		1.265e-08	0.698384		-0.980106	-0.24177	-0.372177
1.2675e-08	0.423147	0.414147	0.165451	0.136401	0.0955427		1.2675e-08	1.99291		0.799562	1.61701	0.966604
1.27e-08	0.423527	0.447517	0.157553	0.131522	0.0932534		1.27e-08	0.485301		-1.43641	0.117352	0.154683
1.2725e-08	0.415747	0.427495	0.158423	0.136739	0.0960813		1.2725e-08	-0.131351		-1.01551	2.00432	1.38937
1.275e-08	0.434532	0.441925	0.16197	0.126575	0.0946001		1.275e-08	0.60335		0.220919	-1.27866	0.898878
1.2775e-08	0.422957	0.422444	0.163041	0.126508	0.0888769		1.2775e-08	-0.222989		0.705344	-1.17048	-1.29698
1.28e-08	0.417834	0.438678	0.162506	0.128405	0.0923781		1.28e-08	1.17989		0.699789	-0.39969	0.209622
1.2825e-08	0.422009	0.419558	0.159628	0.132809	0.0925801		1.2825e-08	2.66866		-0.0231928	1.21999	0.391252
1.285e-08	0.432445	0.423887	0.154541	0.127456	0.095206		1.285e-08	0.838658		-1.42585	-0.458806	1.55015
1.2875e-08	0.418403	0.421001	0.16351	0.130505	0.0954754		1.2875e-08	1.13747		1.47924	0.705136	1.76033
1.29e-08	0.417455	0.428938	0.159762	0.126508	0.09561		1.29e-08	-0.174982		0.484908	-0.520263	1.91633
1.2925e-08	0.409865	0.427314	0.155813	0.126508	0.0853084		1.2925e-08	0.625369		-0.574767	-0.390343	-2.15239
1.295e-08	0.415557	0.436694	0.16438	0.123865	0.0908295		1.295e-08	1.55268		2.22063	-1.16023	0.181757
1.2975e-08	0.414039	0.411441	0.15521	0.121629	0.0937248		1.2975e-08	0.655727		-0.452713	-1.79422	1.45595
1.3e-08	0.403413	0.417935	0.155746	0.12583	0.086857		1.3e-08	0.135022		-0.133638	-0.232133	-1.23525
1.3025e-08	0.412142	0.422444	0.153002	0.128269	0.0888769		1.3025e-08	0.70646		-0.830441	0.731221	-0.316926
1.305e-08	0.42125	0.41577	0.157085	0.122984	0.0885403		1.305e-08	1.44716		0.587847	-0.949601	-0.357234
1.3075e-08	0.411762	0.429659	0.152734	0.127795	0.0923781		1.3075e-08	0.967397		-0.611042	0.827637	1.30535
1.31e-08	0.425994	0.417935	0.15173	0.131725	0.0902235		1.31e-08	-0.673048		-0.772768	2.30689	0.52313
1.3125e-08	0.411193	0.43489	0.153738	0.123797	0.0867897		1.3125e-08	1.20709		0.00342294	-0.290252	-0.785003
1.315e-08	0.416316	0.410359	0.152199	0.127863	0.0939941		1.315e-08	-1.09165		-0.325983	1.23761	2.26181
1.3175e-08	0.404741	0.412524	0.150994	0.122781	0.0933881		1.3175e-08	0.748515		-0.552118	-0.387301	2.11216
1.32e-08	0.425804	0.429118	0.150191	0.118648	0.0880016		1.32e-08	-0.836099		-0.653544	-1.68947	-0.00198033
1.3225e-08	0.412331	0.408194	0.155144	0.125695	0.0841637		1.3225e-08	0.181156		1.05003	0.874144	-1.48504
1.325e-08	0.397151	0.402242	0.150392	0.126372	0.0880689		1.325e-08	0.64894		-0.291252	1.23673	0.216813
1.3275e-08	0.408157	0.408736	0.150325	0.127727	0.0875976		1.3275e-08	0.565785		-0.163146	1.83486	0.117541
1.33e-08	0.399428	0.406932	0.146643	0.12522	0.0875303		1.33e-08	0.418635		-1.17481	1.09109	0.184224
1.3325e-08	0.411952	0.430201	0.146911	0.119393	0.0841637		1.3325e-08	2.07781		-0.943783	-0.811692	-1.11375
1.335e-08	0.404552	0.395929	0.151128	0.12007	0.0892136		1.335e-08	1.73985		0.535955	-0.45231	1.06924
1.3375e-08	0.38311	0.424789	0.148451	0.127795	0.0867897		1.3375e-08	2.78509		-0.163439	2.36864	0.159022
1.34e-08	0.404552	0.397552	0.151998	0.12068	0.0820765		1.34e-08	1.44465		1.10894	0.00771702	-1.70418
1.3425e-08	0.408157	0.395748	0.149722	0.123526	0.0817398		1.3425e-08	1.72278		0.535097	1.12827	-1.75327
1.345e-08	0.402274	0.402603	0.151061	0.123187	0.0865203		1.345e-08	2.47088		1.1091	1.13475	0.327109
1.3475e-08	0.373053	0.412884	0.143431	0.114582	0.0857797		1.3475e-08	0.569974		-1.17376	-1.76303	0.111639
1.35e-08	0.399238	0.417935	0.142159	0.123391	0.0869243		1.35e-08	0.89016		-1.43498	1.45627	0.681874
1.3525e-08	0.399428	0.402603	0.140486	0.122984	0.086453		1.3525e-08	0.247318		-1.82623	1.43767	0.577828
1.355e-08	0.387664	0.394305	0.146911	0.116208	0.085241		1.355e-08	1.61759		0.373404	-0.828998	0.163064
1.3575e-08	0.396961	0.400438	0.146108	0.118241	0.0851064		1.3575e-08	1.83192		0.261093	0.00946406	0.19799
1.36e-08	0.386146	0.399717	0.145439	0.111465	0.0867223		1.36e-08	0.30742		0.190784	-2.2671	0.966856
1.3625e-08	0.389371	0.405489	0.141222	0.116208	0.0840964		1.3625e-08	1.18648		-1.0213	-0.46883	-0.0441542
1.365e-08	0.411952	0.417394	0.13908	0.112888	0.085443		1.365e-08	0.0666036		-1.56907	-1.52711	0.612521
1.3675e-08	0.404931	0.393764	0.139415	0.111533	0.0863857		1.3675e-08	1.22618		-1.31981	-1.89038	1.10056
1.37e-08	0.401326	0.402242	0.138076	0.117021	0.0803259		1.37e-08	0.771628		-1.61085	0.180684	-1.36257
1.3725e-08	0.376278	0.408916	0.145037	0.111397	0.0814032		1.3725e-08	1.89028		0.782968	-1.70331	-0.81947
1.375e-08	0.385956	0.397733	0.137407	0.115937	0.0859144		1.375e-08	1.99632		-1.54635	0.034516	1.17602
1.3775e-08	0.39791	0.405308	0.142762	0.114921	0.086049		1.3775e-08	1.15188		0.33199	-0.209405	1.32387
1.38e-08	0.392407	0.393945	0.139415	0.117089	0.0794506		1.38e-08	3.00863		-0.614015	0.685247	-1.38163
1.3825e-08	0.396961	0.400438	0.140017	0.107603	0.0820092		1.3825e-08	2.22822		-0.277663	-2.59609	-0.209273
1.385e-08	0.388992	0.393945	0.135065	0.110313	0.0807972		1.385e-08	-0.156771		-1.75284	-1.50887	-0.63617
1.3875e-08	0.39829	0.39665	0.136939	0.117699	0.0795179		1.3875e-08	1.78979		-1.00288	1.2619	-1.0931
1.39e-08	0.379694	0.390878	0.139348	0.114311	0.0819418		1.39e-08	-1.9242		-0.0757956	0.161532	0.0257489
1.3925e-08	0.387284	0.379514	0.135198	0.111262	0.0799892		1.3925e-08	0.305937		-1.29545	-0.820096	-0.719056
1.395e-08	0.387094	0.395748	0.142895	0.111804	0.0757474		1.395e-08	2.08325		1.36864	-0.508174	-2.44338
1.3975e-08	0.391079	0.406751	0.143096	0.108484	0.0774306		1.3975e-08	0.86097		1.5766	-1.59222	-1.6393
1.4e-08	0.383489	0.399536	0.136604	0.108822	0.0843657		1.4e-08	1.18252		-0.41872	-1.355	1.4144
1.4025e-08	0.369068	0.379875	0.139549	0.11011	0.0835578		1.4025e-08	0.981411		0.690411	-0.773792	1.15677
1.405e-08	0.389561	0.370496	0.136403	0.10889	0.0815378		1.405e-08	4.11757		-0.208994	-1.102	0.377891
1.4075e-08	0.378176	0.384565	0.138344	0.116276	0.0818072		1.4075e-08	-0.317482		0.570275	1.69752	0.580167
1.41e-08	0.386715	0.390157	0.129041	0.113972	0.087059		1.41e-08	0.768422		-2.37279	0.975963	2.92592
1.4125e-08	0.38292	0.376268	0.131116	0.109161	0.0869243		1.4125e-08	0.41231		-1.5511	-0.662296	2.95717
1.415e-08	0.393736	0.400619	0.138478	0.109703	0.0779693		1.415e-08	1.63149		1.0293	-0.350656	-0.8155
1.4175e-08	0.377417	0.375907	0.134462	0.1116	0.0774306		1.4175e-08	0.464145		-0.168423	0.457224	-0.963679
1.42e-08	0.378555	0.385106	0.139013	0.109635	0.077498		1.42e-08	2.34288		1.48462	-0.147318	-0.850443
1.4225e-08	0.389561	0.381138	0.13386	0.108077	0.0741988		1.4225e-08	1.3712		-0.0965352	-0.604826	-2.19441
1.425e-08	0.372104	0.389976	0.134998	0.109635	0.0809992		1.425e-08	2.85822		0.419697	0.0805923	0.835009
1.4275e-08	0.371345	0.384565	0.134998	0.112414	0.0795852		1.4275e-08	0.587704		0.555862	1.21588	0.307018
1.43e-08	0.378555	0.379875	0.133257	0.105976	0.07669		1.43e-08	2.8467		0.108245	-1.04028	-0.866326
1.4325e-08	0.379694	0.367429	0.131317	0.107738	0.0817398		1.4325e-08	1.71733		-0.408859	-0.2795	1.41304
1.435e-08	0.384817	0.381859	0.137474	0.108822	0.0815378		1.435e-08	0.8944		1.79514	0.232672	1.41032
1.4375e-08	0.38292	0.38691	0.133726	0.1116	0.0822112		1.4375e-08	2.01152		0.669418	1.37243	1.789
1.44e-08	0.365652	0.392141	0.130781	0.10889	0.0795179		1.44e-08	-0.668336		-0.189161	0.482315	0.698574
1.4425e-08	0.375709	0.37735	0.135734	0.105705	0.0780366		1.4425e-08	0.492964		1.61713	-0.586447	0.135079
1.445e-08	0.381212	0.375726	0.131183	0.107128	0.0777		1.445e-08	2.71796		0.213386	0.0528653	0.0709765
1.4475e-08	0.374381	0.36779	0.131718	0.103334	0.0759494		1.4475e-08	0.451693		0.528377	-1.2469	-0.613117
1.45e-08	0.385956	0.378973	0.128706	0.107128	0.078104		1.45e-08	0.375362		-0.359945	0.275753	0.414083
1.4525e-08	0.384058	0.383302	0.128639	0.105502	0.0782386		1.4525e-08	0.808951		-0.250906	-0.219736	0.55606
1.455e-08	0.376089	0.388173	0.125159	0.106586	0.0815378		1.455e-08	2.5974		-1.30402	0.295055	2.08967
1.4575e-08	0.369447	0.381679	0.124824	0.104011	0.0749394		1.4575e-08	0.967003		-1.28878	-0.557804	-0.731651
1.46e-08	0.380453	0.358771	0.127769	0.101775	0.0765553		1.46e-08	0.890277		-0.154531	-1.28661	0.0612437
1.4625e-08	0.377796	0.380957	0.130246	0.103673	0.07568		1.4625e-08	0.679586		0.82251	-0.467598	-0.243829
1.465e-08	0.358632	0.376087	0.127435	0.105638	0.0762187		1.465e-08	1.15882		-0.0081724	0.378865	0.0750127
1.4675e-08	0.368309	0.378613	0.123687	0.10435	0.0733908		1.4675e-08	2.88722		-1.16291	0.00423539	-1.09509
1.47e-08	0.369827	0.379154	0.128238	0.102453	0.0751414		1.47e-08	0.266765		0.528607	-0.601344	-0.239969
1.4725e-08	0.364514	0.354983	0.125226	0.101911	0.0731215		1.4725e-08	1.28223		-0.376291	-0.697839	-1.05534
1.475e-08	0.356924	0.38673	0.124891	0.101911	0.0731888		1.475e-08	-0.114962		-0.362367	-0.59035	-0.946145
1.4775e-08	0.367929	0.370135	0.127167	0.102792	0.0743334		1.4775e-08	1.95324		0.551291	-0.150022	-0.358156
1.48e-08	0.371345	0.377711	0.12971	0.105367	0.0698222		1.48e-08	-0.386494		1.55941	0.932425	-2.28672
1.4825e-08	0.383679	0.371037	0.124757	0.103537	0.0746701		1.4825e-08	1.19173		-0.0235862	0.347058	-0.049423
1.485e-08	0.372294	0.374464	0.123151	0.100149	0.0746027		1.485e-08	3.17623		-0.452317	-0.832193	-0.000184794
1.4875e-08	0.351421	0.37284	0.123151	0.0983196	0.0744681		1.4875e-08	1.5493		-0.325347	-1.4224	0.0188366
1.49e-08	0.365463	0.383843	0.122816	0.101301	0.0727175		1.49e-08	0.795614		-0.314617	-0.182539	-0.685018
1.4925e-08	0.364893	0.367609	0.12449	0.105841	0.0709669		1.4925e-08	0.332722		0.394677	1.65478	-1.39071
1.495e-08	0.35958	0.369233	0.124088	0.100691	0.0704282		1.495e-08	1.19681		0.382629	-0.202927	-1.55491
1.4975e-08	0.363375	0.38222	0.120474	0.0986584	0.0722462		1.4975e-08	0.935813		-0.751251	-0.874259	-0.661985
1.5e-08	0.36774	0.357869	0.126765	0.100894	0.0751414		1.5e-08	1.17027		1.57371	0.0865975	0.716858
1.5025e-08	0.357303	0.354803	0.118131	0.100014	0.0751414		1.5025e-08	2.08201		-1.32039	-0.145548	0.795968
1.505e-08	0.358252	0.364002	0.123887	0.0963545	0.0713035		1.505e-08	0.0816881		0.821487	-1.44554	-0.8539
1.5075e-08	0.358062	0.375366	0.120541	0.097913	0.0692163		1.5075e-08	-0.76935		-0.227074	-0.743712	-1.71857
1.51e-08	0.350282	0.381499	0.120608	0.102859	0.0761514		1.51e-08	0.482005		-0.0789403	1.2639	1.48804
1.5125e-08	0.376468	0.365445	0.122883	0.0965578	0.0706975		1.5125e-08	0.512492		0.847032	-1.05953	-0.898261
1.515e-08	0.355595	0.365445	0.126029	0.100352	0.0737948		1.515e-08	0.56541		2.08227	0.507863	0.579542
1.5175e-08	0.341744	0.37248	0.119135	0.0989294	0.0719768		1.5175e-08	1.09448		-0.224987	0.0624838	-0.166379
1.52e-08	0.355406	0.371397	0.11947	0.102792	0.0718422		1.52e-08	1.57882		0.0174717	1.66148	-0.15063
1.5225e-08	0.355406	0.361477	0.117663	0.0992682	0.0727848		1.5225e-08	0.927799		-0.49842	0.401749	0.354208
1.525e-08	0.350282	0.383122	0.115856	0.0979808	0.0707649		1.525e-08	0.116365		-1.01637	0.00604355	-0.487142
1.5275e-08	0.348195	0.355344	0.119938	0.0966933	0.0716402		1.5275e-08	1.53384		0.556004	-0.391287	-0.012859
1.53e-08	0.362047	0.361657	0.113982	0.0954059	0.0749394		1.53e-08	1.90582		-1.43969	-0.790265	1.56685
1.5325e-08	0.359011	0.344702	0.116726	0.0965578	0.0728521		1.5325e-08	2.00473		-0.3416	-0.240192	0.692074
1.535e-08	0.353698	0.352638	0.120407	0.0985906	0.0730541		1.535e-08	-1.70683		1.09355	0.654694	0.860735
1.5375e-08	0.350852	0.354081	0.118667	0.0939152	0.0710342		1.5375e-08	0.900738		0.595179	-1.06962	0.0133579
1.54e-08	0.353318	0.349031	0.119068	0.0923567	0.0700242		1.54e-08	1.15832		0.861528	-1.57921	-0.373723
1.5425e-08	0.341933	0.3438	0.112978	0.0957447	0.0717075		1.5425e-08	0.661205		-1.19836	-0.152297	0.472764
1.545e-08	0.342503	0.360394	0.116324	0.0935086	0.0717748		1.545e-08	-1.53112		0.12261	-0.928284	0.579438
1.5475e-08	0.346487	0.361837	0.114718	0.0989294	0.068341		1.5475e-08	1.24491		-0.333173	1.30149	-0.922573
1.55e-08	0.350093	0.34398	0.114986	0.0968288	0.0707649		1.55e-08	1.3653		-0.116223	0.577967	0.26628
1.5525e-08	0.342503	0.346325	0.111438	0.0977775	0.0682736		1.5525e-08	1.21037		-1.27454	1.05312	-0.806121
1.555e-08	0.357113	0.351736	0.113714	0.0972354	0.068745		1.555e-08	-0.139421		-0.334763	0.940979	-0.515425
1.5575e-08	0.35237	0.357869	0.115588	0.0920856	0.0686103		1.5575e-08	1.88803		0.461955	-0.9919	-0.504129
1.56e-08	0.328651	0.367068	0.116257	0.0924244	0.0722462		1.56e-08	0.9504		0.82431	-0.759584	1.24939
1.5625e-08	0.360719	0.351376	0.113112	0.0956769	0.0696876		1.5625e-08	1.87634		-0.195901	0.62696	0.140776
1.565e-08	0.333584	0.338749	0.116525	0.0914758	0.0698896		1.565e-08	1.46674		1.16228	-0.938847	0.308121
1.5675e-08	0.345159	0.342176	0.114986	0.0923567	0.0711689		1.5675e-08	0.0181413		0.723172	-0.491007	0.97528
1.57e-08	0.345159	0.352277	0.113647	0.094796	0.0715055		1.57e-08	0.436995		0.355652	0.577512	1.2062
1.5725e-08	0.35199	0.341816	0.115387	0.0978452	0.0723135		1.5725e-08	1.01814		1.10948	1.89142	1.65652
1.575e-08	0.33719	0.355524	0.114785	0.0910693	0.0663884		1.575e-08	0.952609		1.00946	-0.708734	-1.02549
1.5775e-08	0.349713	0.347948	0.109899	0.093102	0.0697549		1.5775e-08	0.817441		-0.65811	0.200277	0.614589
1.58e-08	0.35218	0.346505	0.109966	0.0929665	0.0698896		1.58e-08	1.30741		-0.517105	0.244399	0.750733
1.5825e-08	0.350662	0.330271	0.111773	0.0920856	0.0696876		1.5825e-08	1.1721		0.261998	-0.0101855	0.729659
1.585e-08	0.350093	0.338749	0.108694	0.094796	0.0697549		1.585e-08	0.177855		-0.75178	1.17356	0.834154
1.5875e-08	0.353888	0.345784	0.11097	0.0922889	0.0702936		1.5875e-08	1.36467		0.200728	0.266178	1.15924
1.59e-08	0.347057	0.352458	0.115119	0.089443	0.0680716		1.59e-08	2.437		1.84602	-0.779984	0.191542
1.5925e-08	0.347816	0.334059	0.111304	0.0890365	0.0696203		1.5925e-08	2.46411		0.557673	-0.847515	0.99005
1.595e-08	0.340036	0.356967	0.111037	0.094254	0.067129		1.595e-08	1.67623		0.575832	1.35067	-0.106777
1.5975e-08	0.352559	0.349752	0.110769	0.0920856	0.066523		1.5975e-08	1.18978		0.593694	0.574519	-0.320008
1.6e-08	0.341744	0.341635	0.110367	0.0913403	0.0655131		1.6e-08	-0.720086		0.56152	0.370784	-0.724124
1.6025e-08	0.322389	0.32955	0.107489	0.0910015	0.067129		1.6025e-08	2.19798		-0.390137	0.330478	0.107761
1.605e-08	0.326563	0.344702	0.109029	0.0922889	0.0671963		1.605e-08	0.285593		0.296116	0.948273	0.210686
1.6075e-08	0.338328	0.349572	0.107423	0.0887654	0.0673983		1.6075e-08	-0.858618		-0.186679	-0.384047	0.377113
1.61e-08	0.354267	0.341455	0.109363	0.0815829	0.0691489		1.61e-08	0.966569		0.65043	-3.20625	1.27578
1.6125e-08	0.328461	0.331895	0.106686	0.0884266	0.0634931		1.6125e-08	0.733881		-0.233625	-0.332289	-1.32916
1.615e-08	0.35218	0.341274	0.109096	0.0888332	0.0657824		1.615e-08	1.97704		0.780241	-0.0721488	-0.175527
1.6175e-08	0.33662	0.32504	0.106619	0.087749	0.0686103		1.6175e-08	1.6036		-0.0315151	-0.419301	1.23608
1.62e-08	0.339846	0.33442	0.110903	0.0882911	0.066725		1.62e-08	1.20587		1.68732	-0.103634	0.412485
1.6225e-08	0.333584	0.343439	0.108828	0.0872747	0.067331		1.6225e-08	-0.320396		1.02466	-0.42449	0.771256
1.625e-08	0.34421	0.335863	0.0979185	0.0872747	0.0665904		1.625e-08	1.34858		-2.96045	-0.330526	0.489639
1.6275e-08	0.335482	0.328468	0.10856	0.0878168	0.0643011		1.6275e-08	0.761047		1.15302	-0.0146141	-0.530835
1.63e-08	0.326943	0.32468	0.10836	0.0893075	0.0647724		1.63e-08	1.3972		1.19134	0.690943	-0.237077
1.6325e-08	0.329789	0.328287	0.100127	0.0864616	0.065917		1.6325e-08	1.79856		-1.80188	-0.384155	0.37857
1.635e-08	0.323527	0.327205	0.104946	0.0838867	0.0630891		1.635e-08	2.60148		0.128488	-1.35089	-0.903867
1.6375e-08	0.311193	0.331354	0.105013	0.0918146	0.0653784		1.6375e-08	0.855504		0.265504	2.0067	0.259794
1.64e-08	0.333394	0.32504	0.102537	0.0872747	0.0647051		1.64e-08	-0.657287		-0.561277	0.229432	0.00639104
1.6425e-08	0.338138	0.326483	0.102269	0.0879523	0.0640318		1.6425e-08	-0.0206346		-0.552345	0.602554	-0.247698
1.645e-08	0.341554	0.33911	0.105415	0.0849709	0.0678696		1.645e-08	1.75302		0.75372	-0.536933	1.66384
1.6475e-08	0.319353	0.329009	0.102871	0.0859195	0.0645704		1.6475e-08	2.46344		-0.102137	-0.0520237	0.148334
1.65e-08	0.330738	0.338569	0.106686	0.0859873	0.0657824		1.65e-08	-0.144247		1.46257	0.0684979	0.800345
1.6525e-08	0.318784	0.33442	0.103875	0.0888332	0.0605979		1.6525e-08	1.91808		0.502079	1.34241	-1.6284
1.655e-08	0.333774	0.336585	0.10073	0.082396	0.0639644		1.655e-08	-0.338298		-0.589619	-1.24036	0.0617074
1.6575e-08	0.332446	0.32955	0.10334	0.0847676	0.0651091		1.6575e-08	0.895235		0.518208	-0.163205	0.682337
1.66e-08	0.32163	0.317825	0.100997	0.0885621	0.0657824		1.66e-08	0.061217		-0.26965	1.5095	1.07625
1.6625e-08	0.326753	0.333699	0.10421	0.078737	0.0628872		1.6625e-08	1.77285		1.07218	-2.49813	-0.256121
1.665e-08	0.318025	0.337306	0.10247	0.0862583	0.0634931		1.665e-08	2.29579		0.513831	0.732832	0.104673
1.6675e-08	0.32922	0.331714	0.10006	0.0819894	0.0631565		1.6675e-08	0.411034		-0.303916	-0.961533	0.00896054
1.67e-08	0.32144	0.333518	0.10334	0.0815151	0.0635605		1.67e-08	0.16966		1.06862	-1.07061	0.272525
1.6725e-08	0.317835	0.329369	0.101265	0.0824637	0.0625505		1.6725e-08	1.07418		0.377983	-0.583247	-0.150782
1.675e-08	0.327702	0.3346	0.0975838	0.0840222	0.058982		1.675e-08	-0.290747		-0.935928	0.161187	-1.82029
1.6775e-08	0.315937	0.322695	0.100863	0.082396	0.0619445		1.6775e-08	-0.6293		0.440194	-0.432397	-0.312173
1.68e-08	0.310814	0.332436	0.101198	0.0784659	0.0610692		1.68e-08	0.75538		0.678121	-1.9982	-0.6727
1.6825e-08	0.311193	0.320711	0.099324	0.082396	0.0612039		1.6825e-08	0.46487		0.0589002	-0.253982	-0.541225
1.685e-08	0.316507	0.327385	0.100194	0.0830736	0.0640991		1.685e-08	0.245674		0.504143	0.121115	0.939507
1.6875e-08	0.322579	0.327926	0.0987216	0.0845643	0.0636278		1.6875e-08	-0.646122		0.0385235	0.840658	0.776125
1.69e-08	0.308537	0.313677	0.0966468	0.0840222	0.0662537		1.69e-08	0.958578		-0.663424	0.701371	2.12929
1.6925e-08	0.327512	0.327566	0.100328	0.084361	0.0596553		1.6925e-08	1.72427		0.879078	0.934912	-1.03778
1.695e-08	0.32125	0.317104	0.103139	0.0815829	0.0610019		1.695e-08	2.34668		2.08558	-0.153883	-0.311849
1.6975e-08	0.326753	0.318547	0.0983201	0.0802277	0.0616752		1.6975e-08	0.899118		0.308771	-0.641059	0.0846368
1.7e-08	0.327133	0.318547	0.0925641	0.0836157	0.0618772		1.7e-08	1.01555		-1.84068	0.888224	0.249894
1.7025e-08	0.310434	0.335322	0.102001	0.0804987	0.0632238		1.7025e-08	0.505004		1.96644	-0.350155	0.978928
1.705e-08	0.318025	0.322876	0.0971823	0.0782626	0.0608672		1.705e-08	-0.730599		0.180504	-1.2164	-0.116493
1.7075e-08	0.31385	0.325221	0.0956429	0.0807698	0.0623485		1.7075e-08	0.133431		-0.320129	-0.059495	0.679608
1.71e-08	0.309106	0.332075	0.0949736	0.0828703	0.058376		1.71e-08	3.07799		-0.479631	0.926162	-1.21742
1.7125e-08	0.322009	0.318186	0.0930995	0.0812441	0.0601266		1.7125e-08	-0.893281		-1.11534	0.318368	-0.287974
1.715e-08	0.32903	0.307003	0.101064	0.0797534	0.0650417		1.715e-08	1.23144		2.13524	-0.233059	2.21027
1.7175e-08	0.323338	0.32468	0.0945051	0.0752812	0.0625505		1.7175e-08	0.378318		-0.353185	-2.06583	1.04257
1.72e-08	0.30645	0.323597	0.0957098	0.077585	0.0596553		1.72e-08	0.809219		0.228095	-0.991114	-0.328231
1.7225e-08	0.316317	0.31043	0.0995917	0.0772462	0.0607326		1.7225e-08	-1.25971		1.87312	-1.05114	0.271221
1.725e-08	0.314419	0.308265	0.0963122	0.0794823	0.0608672		1.725e-08	0.628057		0.676328	-0.00215292	0.402982
1.7275e-08	0.299808	0.317284	0.0920956	0.08409	0.0594533		1.7275e-08	2.05682		-0.897162	2.07225	-0.236193
1.73e-08	0.311004	0.32017	0.0933003	0.0832769	0.056962		1.73e-08	0.275643		-0.315187	1.8098	-1.41392
1.7325e-08	0.312522	0.310249	0.0920956	0.0777206	0.0593859		1.7325e-08	1.0974		-0.693561	-0.505243	-0.142276
1.735e-08	0.316317	0.312594	0.0949736	0.0794823	0.05878		1.735e-08	0.774764		0.558019	0.342765	-0.381347
1.7375e-08	0.312711	0.327926	0.0910916	0.0772462	0.0574333		1.7375e-08	0.280649		-0.89211	-0.540831	-0.991391
1.74e-08	0.302844	0.314218	0.0941035	0.0780594	0.058578		1.74e-08	0.615588		0.415732	-0.103019	-0.355999
1.7425e-08	0.316696	0.307363	0.0926979	0.0797534	0.057972		1.7425e-08	0.804274		-0.0454011	0.718659	-0.596468
1.745e-08	0.307588	0.315841	0.0909578	0.0761621	0.0586453		1.745e-08	0.112794		-0.642462	-0.758143	-0.195904
1.7475e-08	0.308916	0.318908	0.0921625	0.0747391	0.0608672		1.7475e-08	0.888435		-0.0566254	-1.29395	0.982945
1.75e-08	0.305121	0.306642	0.0933672	0.0786692	0.0621465		1.75e-08	1.83668		0.53041	0.504324	1.69029
1.7525e-08	0.310245	0.312594	0.0891507	0.0781271	0.0605306		1.7525e-08	2.71284		-1.06858	0.352879	0.942036
1.755e-08	0.307968	0.31061	0.0845325	0.0749424	0.0596553		1.755e-08	0.744644		-2.83469	-0.955346	0.564978
1.7575e-08	0.317835	0.310249	0.0933672	0.073655	0.0611365		1.7575e-08	2.16131		0.836057	-1.43625	1.37518
1.76e-08	0.292218	0.310971	0.0884814	0.074197	0.0581067		1.76e-08	-0.228465		-1.04156	-1.11636	-0.0903083
1.7625e-08	0.313091	0.317645	0.0919617	0.0766364	0.0603959		1.7625e-08	-0.359883		0.469039	0.0371294	1.12884
1.765e-08	0.299429	0.303936	0.0851349	0.0748069	0.0599919		1.765e-08	1.00956		-2.20311	-0.683363	0.988036
1.7675e-08	0.309675	0.30592	0.0873436	0.0749424	0.0626178		1.7675e-08	0.730747		-1.20762	-0.540854	2.38117
1.77e-08	0.292408	0.307003	0.0894184	0.0786014	0.0630891		1.77e-08	-0.189582		-0.264143	1.15473	2.68492
1.7725e-08	0.302275	0.301591	0.088816	0.0709446	0.0576353		1.7725e-08	3.10711		-0.410259	-2.13901	-0.0177032
1.775e-08	0.299049	0.321974	0.0926979	0.07562	0.0605306		1.775e-08	1.56974		1.27424	0.00735596	1.51517
1.7775e-08	0.30645	0.304477	0.0875443	0.0751457	0.0537975		1.7775e-08	2.15489		-0.732334	-0.119406	-1.84549
1.78e-08	0.304932	0.311873	0.0854695	0.0752134	0.0593186		1.78e-08	1.52915		-1.48406	-0.0067963	1.02499
1.7825e-08	0.304932	0.298345	0.0879459	0.0683019	0.0562887		1.7825e-08	3.22877		-0.371963	-2.98933	-0.456559
1.785e-08	0.295444	0.291851	0.0877451	0.0740615	0.0591839		1.785e-08	1.61187		-0.356537	-0.353407	1.08135
1.7875e-08	0.303414	0.309167	0.0862727	0.0786014	0.0602612		1.7875e-08	-0.354856		-0.864231	1.74659	1.69393
1.79e-08	0.295065	0.317465	0.0864735	0.0780594	0.0531915		1.79e-08	0.2056		-0.68459	1.58955	-1.85742
1.7925e-08	0.294495	0.304477	0.0874774	0.0750102	0.0554807		1.7925e-08	0.295019		-0.173514	0.314649	-0.626618
1.795e-08	0.297152	0.320711	0.088816	0.0759588	0.0613385		1.795e-08	1.20444		0.476909	0.820332	2.4349
1.7975e-08	0.287285	0.304838	0.0858042	0.0689118	0.0537975		1.7975e-08	1.81677		-0.669669	-2.24515	-1.36896
1.8e-08	0.307209	0.304658	0.0871428	0.0730451	0.0572987		1.8e-08	1.35978		-0.0188144	-0.317305	0.488028
1.8025e-08	0.304742	0.313316	0.0854695	0.0731806	0.0570967		1.8025e-08	-0.119252		-0.615145	-0.175593	0.445465
1.805e-08	0.294116	0.304477	0.0883475	0.0742648	0.0545381		1.805e-08	0.692689		0.675546	0.391466	-0.809854
1.8075e-08	0.284249	0.294015	0.0845994	0.0726386	0.0566927		1.8075e-08	1.20646		-0.784767	-0.257336	0.359303
1.81e-08	0.297721	0.301952	0.0885483	0.0735872	0.0549421		1.81e-08	-0.800877		0.954059	0.249454	-0.482618
1.8125e-08	0.295444	0.299607	0.0809183	0.0683019	0.0574333		1.8125e-08	1.96114		-2.12824	-2.04849	0.862725
1.815e-08	0.296962	0.301952	0.0813199	0.0712156	0.0574333		1.815e-08	1.32627		-1.86736	-0.657535	0.923715
1.8175e-08	0.28292	0.293474	0.0839301	0.0735194	0.0527202		1.8175e-08	-0.135711		-0.683006	0.461548	-1.45276
1.82e-08	0.301896	0.312594	0.0872766	0.0701315	0.0554134		1.82e-08	-2.20132		0.812406	-0.987992	5.25637e-05
1.8225e-08	0.292029	0.303395	0.0816545	0.0717577	0.0564907		1.8225e-08	0.642962		-1.44623	-0.173384	0.61831
1.825e-08	0.296583	0.303936	0.0828592	0.073655	0.0549421		1.825e-08	0.029572		-0.847053	0.765675	-0.124632
1.8275e-08	0.30588	0.301411	0.0867412	0.0729096	0.0531915		1.8275e-08	2.62893		0.878023	0.508479	-0.974269
1.83e-08	0.282161	0.298525	0.0854695	0.0726386	0.0560867		1.83e-08	-0.521892		0.43921	0.465589	0.589315
1.8325e-08	0.29108	0.29131	0.0872097	0.0712834	0.0561541		1.8325e-08	1.90498		1.26751	-0.0705167	0.684245
1.835e-08	0.286715	0.292753	0.0900877	0.0695216	0.0548748		1.835e-08	0.0822322		2.5776	-0.793224	0.0776575
1.8375e-08	0.292029	0.294917	0.0863396	0.0701992	0.0582413		1.8375e-08	-0.081198		1.09229	-0.406483	1.89243
1.84e-08	0.297911	0.290408	0.0845994	0.071961	0.0578373		1.84e-08	-1.20297		0.452	0.475606	1.74251
1.8425e-08	0.276848	0.291129	0.0845325	0.0733839	0.0519795		1.8425e-08	0.22131		0.518441	1.20497	-1.25782
1.845e-08	0.280833	0.288424	0.083127	0.0713511	0.0531915		1.845e-08	-0.195385		0.0172316	0.355688	-0.566183
1.8475e-08	0.281782	0.287341	0.0815206	0.070267	0.0544034		1.8475e-08	0.726344		-0.570835	-0.0615337	0.126762
1.85e-08	0.282731	0.287883	0.0807175	0.0694539	0.0541341		1.85e-08	0.20804		-0.819338	-0.355811	0.0444688
1.8525e-08	0.289941	0.285538	0.079312	0.072232	0.0525855		1.8525e-08	1.25794		-1.32541	0.997108	-0.709527
1.855e-08	0.2833	0.30087	0.085938	0.0727063	0.0517775		1.855e-08	0.56181		1.59075	1.29427	-1.07628
1.8575e-08	0.296013	0.295458	0.0811191	0.0648462	0.0542015		1.8575e-08	0.295405		-0.371491	-2.24269	0.255402
1.86e-08	0.283679	0.290769	0.0809183	0.072503	0.0543361		1.86e-08	-0.0983934		-0.365232	1.3592	0.384657
1.8625e-08	0.277038	0.28644	0.08306	0.0689795	0.0531242		1.8625e-08	0.522551		0.643431	-0.186716	-0.19551
1.865e-08	0.288992	0.288604	0.0818553	0.0706735	0.0529895		1.865e-08	1.06807		0.220313	0.672659	-0.208759
1.8675e-08	0.276659	0.288604	0.0849341	0.0699959	0.0513736		1.8675e-08	0.139423		1.63418	0.437572	-1.00423
1.87e-08	0.287664	0.284816	0.0844656	0.0672178	0.0519795		1.87e-08	1.60134		1.52727	-0.770509	-0.627065
1.8725e-08	0.277228	0.281209	0.0799813	0.0666079	0.0536628		1.8725e-08	-1.13689		-0.308119	-0.976844	0.320731
1.875e-08	0.280074	0.281209	0.0775718	0.0706058	0.0487476		1.875e-08	-0.311082		-1.25477	0.953972	-2.22441
1.8775e-08	0.281972	0.284275	0.0783749	0.0645751	0.0512389		1.8775e-08	-0.223796		-0.818342	-1.76964	-0.848347
1.88e-08	0.270397	0.29149	0.0789104	0.0687085	0.0547401		1.88e-08	-0.902313		-0.49686	0.227208	1.06631
1.8825e-08	0.261858	0.281569	0.0782411	0.0664724	0.0524508		1.8825e-08	1.04961		-0.696065	-0.737519	-0.0915587
1.885e-08	0.283869	0.274895	0.0789773	0.0662691	0.0531242		1.885e-08	2.00728		-0.287338	-0.757077	0.323519
1.8875e-08	0.298101	0.28662	0.0819222	0.0680309	0.0538648		1.8875e-08	-1.05132		1.08013	0.140376	0.775151
1.89e-08	0.279884	0.294557	0.0777726	0.0668112	0.0504982		1.89e-08	1.2888		-0.629996	-0.353547	-0.961064
1.8925e-08	0.284438	0.29149	0.08306	0.0659981	0.0509022		1.8925e-08	-0.699074		1.7589	-0.65855	-0.689595
1.895e-08	0.274761	0.284636	0.0758985	0.0666079	0.0514409		1.895e-08	-0.971635		-1.26658	-0.297798	-0.345753
1.8975e-08	0.277797	0.285177	0.0800482	0.0645751	0.0554807		1.8975e-08	0.0644721		0.631284	-1.17587	1.87015
1.9e-08	0.286715	0.284095	0.0795797	0.0638298	0.0532588		1.9e-08	1.10213		0.517673	-1.45172	0.739915
1.9025e-08	0.279505	0.279766	0.077371	0.0689118	0.0501616		1.9025e-08	1.01007		-0.357358	1.01125	-0.861671
1.905e-08	0.267361	0.291851	0.074493	0.0695216	0.0533935		1.905e-08	-0.240103		-1.52808	1.3746	0.926662
1.9075e-08	0.269448	0.28193	0.0775718	0.0624068	0.0529222		1.9075e-08	-0.333509		-0.0915186	-1.90206	0.730897
1.91e-08	0.281782	0.2675	0.0790442	0.068844	0.0535281		1.91e-08	0.397522		0.643543	1.20776	1.11334
1.9125e-08	0.285008	0.285898	0.0798474	0.0672855	0.0513736		1.9125e-08	-1.83658		1.08617	0.547508	0.0118006
1.915e-08	0.259391	0.271468	0.0779064	0.0656593	0.0562214		1.915e-08	1.88835		0.322336	-0.146515	2.67761
1.9175e-08	0.280833	0.288063	0.0751623	0.0691151	0.0502289		1.9175e-08	-0.555087		-0.797507	1.56423	-0.492937
1.92e-08	0.278177	0.285898	0.0763001	0.0673533	0.0509022		1.92e-08	-0.856688		-0.207919	0.805262	-0.0742731
1.9225e-08	0.268499	0.282291	0.0745599	0.0630167	0.0520469		1.9225e-08	0.833394		-0.88832	-1.17794	0.599625
1.925e-08	0.27533	0.268763	0.0752962	0.0628811	0.047199		1.925e-08	-0.322269		-0.475499	-1.16959	-1.96438
1.9275e-08	0.274002	0.283914	0.0753631	0.0622036	0.0494883		1.9275e-08	-0.3655		-0.35843	-1.41947	-0.672079
1.93e-08	0.273812	0.270386	0.0777726	0.065456	0.0508349		1.93e-08	-0.227316		0.797346	0.20191	0.11206
1.9325e-08	0.266222	0.274895	0.0732213	0.0629489	0.0490843		1.9325e-08	1.07898		-1.13508	-0.920147	-0.781641
1.935e-08	0.2759	0.272911	0.0752962	0.0674211	0.0509696		1.935e-08	0.932586		-0.126789	1.28753	0.295935
1.9375e-08	0.270966	0.283193	0.0760324	0.0613904	0.0515755		1.9375e-08	1.07176		0.287945	-1.52084	0.680565
1.94e-08	0.277418	0.270206	0.0762332	0.0638975	0.0507002		1.94e-08	1.78333		0.464887	-0.249523	0.260334
1.9425e-08	0.274192	0.282111	0.0769694	0.0608484	0.0511716		1.9425e-08	1.40233		0.881126	-1.63792	0.572219
1.945e-08	0.274002	0.281209	0.0729536	0.0638975	0.0501616		1.945e-08	0.18677		-0.825527	-0.103895	0.0774873
1.9475e-08	0.266412	0.274895	0.0744261	0.0638298	0.0532588		1.9475e-08	0.507769		-0.0808109	-0.0636077	1.82194
1.95e-08	0.277797	0.273994	0.0746938	0.0647784	0.0457177		1.95e-08	-0.606184		0.125685	0.46532	-2.23885
1.9525e-08	0.259201	0.278142	0.0734891	0.0589511	0.0504309		1.9525e-08	2.37862		-0.328331	-2.26733	0.389621
1.955e-08	0.275141	0.2675	0.0694733	0.0638298	0.0486803		1.955e-08	-1.32346		-2.04681	0.154081	-0.513211
1.9575e-08	0.275141	0.273452	0.0729536	0.0613227	0.0503636		1.9575e-08	-0.0350261		-0.398098	-0.98362	0.462528
1.96e-08	0.269258	0.272731	0.0748277	0.0638975	0.0501616		1.96e-08	-1.62445		0.531062	0.331304	0.40655
1.9625e-08	0.281402	0.266057	0.0720835	0.0649139	0.0498249		1.9625e-08	-0.491698		-0.620362	0.895216	0.276439
1.965e-08	0.272864	0.282111	0.0722174	0.062068	0.0488823		1.965e-08	0.773767		-0.47532	-0.410298	-0.186894
1.9675e-08	0.276659	0.281028	0.0741584	0.0575281	0.0495556		1.9675e-08	0.4141		0.487039	-2.54041	0.237295
1.97e-08	0.258632	0.268763	0.0714812	0.0594254	0.0519795		1.97e-08	-0.13009		-0.639098	-1.55064	1.62579
1.9725e-08	0.271535	0.270025	0.0758316	0.0606451	0.0503636		1.9725e-08	1.3485		1.41742	-0.888035	0.791179
1.975e-08	0.274002	0.278864	0.071615	0.0630844	0.049219		1.975e-08	1.30377		-0.409708	0.369394	0.214666
1.9775e-08	0.268499	0.264253	0.0732883	0.0597642	0.0465257		1.9775e-08	1.7064		0.434946	-1.1765	-1.21813
1.98e-08	0.257494	0.261006	0.0704103	0.0601708	0.0478723		1.98e-08	2.63649		-0.789794	-0.908589	-0.421531
1.9825e-08	0.261478	0.258842	0.073556	0.0613904	0.0490843		1.9825e-08	-0.202178		0.726713	-0.243271	0.301973
1.985e-08	0.266602	0.254332	0.0694063	0.0624746	0.0507676		1.985e-08	1.33453		-1.08165	0.357114	1.28773
1.9875e-08	0.264894	0.26768	0.0706111	0.0623391	0.0465257		1.9875e-08	-0.770496		-0.448835	0.361728	-1.00873
1.99e-08	0.259012	0.270386	0.0728867	0.0599675	0.049421		1.99e-08	-1.05556		0.67526	-0.72955	0.649882
1.9925e-08	0.257304	0.260285	0.0708119	0.0620003	0.0507676		1.9925e-08	0.192706		-0.190412	0.337354	1.45168
1.995e-08	0.273433	0.264073	0.0700756	0.0621358	0.048815		1.995e-08	0.304685		-0.444598	0.47472	0.420896
1.9975e-08	0.255217	0.26281	0.0723512	0.0636943	0.0475357		1.9975e-08	1.76764		0.683314	1.312	-0.237372
2e-08	0.270587	0.258842	0.0705441	0.0609161	0.0485457		2e-08	1.45671		-0.0632851	0.015907	0.378064
2.0025e-08	0.269069	0.268943	0.0718158	0.0594932	0.0501616		2.0025e-08	-0.950594		0.60515	-0.615525	1.33241
2.005e-08	0.269448	0.274715	0.0657921	0.0630844	0.0474684		2.005e-08	0.142915		-2.08784	1.22571	-0.116651
2.0075e-08	0.266602	0.262089	0.0689378	0.0604418	0.048007		2.0075e-08	2.67288		-0.556105	-0.00897753	0.236833
2.01e-08	0.270207	0.255415	0.0706111	0.0612549	0.047603		2.01e-08	0.154279		0.298798	0.462566	0.0637077
2.0125e-08	0.274382	0.272009	0.0696741	0.058409	0.0458524		2.0125e-08	-0.532151		-0.0521236	-0.876958	-0.863702
2.015e-08	0.263945	0.273813	0.0722843	0.0588833	0.0458524		2.015e-08	0.0319438		1.23932	-0.57361	-0.812097
2.0175e-08	0.274002	0.260465	0.0698748	0.05868	0.0459197		2.0175e-08	-0.122883		0.20534	-0.606	-0.722698
2.02e-08	0.26034	0.265335	0.0684024	0.0579347	0.0475357		2.02e-08	0.602183		-0.396212	-0.907961	0.236275
2.0225e-08	0.259012	0.258301	0.0671976	0.0612549	0.048209		2.0225e-08	0.474033		-0.875003	0.81191	0.667273
2.025e-08	0.266032	0.265516	0.0689378	0.0599675	0.048815		2.025e-08	-1.31078		0.0160169	0.240495	1.06109
2.0275e-08	0.241934	0.254152	0.0680677	0.0607128	0.0469297		2.0275e-08	-0.692115		-0.308106	0.681154	0.0526253
2.03e-08	0.26034	0.254152	0.0672646	0.0595609	0.0458524		2.03e-08	-0.687966		-0.602191	0.175311	-0.502599
2.0325e-08	0.260719	0.260104	0.0672646	0.0575281	0.047603		2.0325e-08	0.89604		-0.521942	-0.772263	0.536489
2.035e-08	0.241744	0.265516	0.0675323	0.0561729	0.0468624		2.035e-08	2.13401		-0.316467	-1.38318	0.170454
2.0375e-08	0.258822	0.255595	0.0677331	0.0591544	0.0450444		2.0375e-08	0.638116		-0.142051	0.176893	-0.805456
2.04e-08	0.264894	0.253611	0.0665283	0.0592221	0.0436978		2.04e-08	-0.994469		-0.626852	0.279058	-1.51666
2.0425e-08	0.259391	0.271829	0.0698748	0.058409	0.0471317		2.0425e-08	0.459366		1.02518	-0.0609709	0.478601
2.045e-08	0.25237	0.259022	0.0688709	0.0582735	0.0459197		2.045e-08	-0.0202094		0.634793	-0.0612586	-0.156528
2.0475e-08	0.249904	0.258842	0.065859	0.055292	0.048815		2.0475e-08	-0.0970718		-0.702508	-1.49405	1.5381
2.05e-08	0.268309	0.251807	0.0669969	0.0580024	0.048613		2.05e-08	0.579756		-0.0865373	-0.0623779	1.4763
2.0525e-08	0.262048	0.251987	0.0673315	0.0546144	0.0437651		2.0525e-08	0.125882		0.151391	-1.70409	-1.22783
2.055e-08	0.255027	0.258301	0.0631149	0.0554953	0.0455158		2.055e-08	1.26225		-1.76222	-1.19392	-0.181354
2.0575e-08	0.253888	0.244231	0.0657921	0.05868	0.0457851		2.0575e-08	1.26685		-0.417593	0.482034	0.0229646
2.06e-08	0.254647	0.258842	0.064989	0.0580024	0.0467277		2.06e-08	1.78451		-0.719462	0.206505	0.611565
2.0625e-08	0.247627	0.261006	0.0653236	0.059832	0.0450444		2.0625e-08	0.113474		-0.482327	1.20074	-0.297964
2.065e-08	0.246678	0.251086	0.0629141	0.0590188	0.0469297		2.065e-08	-0.28896		-1.54868	0.856344	0.829964
2.0675e-08	0.254268	0.24351	0.0651897	0.0561729	0.0455158		2.0675e-08	0.688455		-0.388842	-0.521493	0.0727739
2.07e-08	0.25294	0.258661	0.0655913	0.056715	0.0434958		2.07e-08	1.09834		-0.118952	-0.179714	-1.03295
2.0725e-08	0.248575	0.232146	0.0673984	0.0554953	0.0457177		2.0725e-08	0.858051		0.821806	-0.734236	0.290284
2.075e-08	0.247057	0.245494	0.0674654	0.0539368	0.0477377		2.075e-08	-1.03784		0.933595	-1.46294	1.50008
2.0775e-08	0.257114	0.250544	0.0655244	0.055292	0.0459871		2.0775e-08	0.37617		0.0852006	-0.706791	0.546739
2.08e-08	0.249524	0.259744	0.0667291	0.0582057	0.0444385		2.08e-08	-0.327399		0.740368	0.846968	-0.292539
2.0825e-08	0.249904	0.24351	0.0664614	0.0551565	0.0447751		2.0825e-08	-0.460996		0.691	-0.645679	-0.0488591
2.085e-08	0.256735	0.240804	0.0621779	0.0529882	0.0471317		2.085e-08	-0.0777634		-1.2862	-1.69091	1.35853
2.0875e-08	0.236431	0.265155	0.0632488	0.0573248	0.0442365		2.0875e-08	-0.919835		-0.695413	0.595844	-0.259173
2.09e-08	0.245349	0.237738	0.0651228	0.059832	0.0455158		2.09e-08	-1.00008		0.283144	1.94878	0.528883
2.0925e-08	0.244401	0.251987	0.061174	0.0584768	0.0426879		2.0925e-08	-1.13514		-1.54127	1.32031	-1.05404
2.095e-08	0.264894	0.249462	0.0671976	0.0541401	0.0407353		2.095e-08	-0.560674		1.44008	-0.843263	-2.13402
2.0975e-08	0.235293	0.254693	0.0606385	0.0532592	0.0452464		2.0975e-08	0.834292		-1.64848	-1.23236	0.524754
2.1e-08	0.248765	0.244772	0.065859	0.0514297	0.0451791		2.1e-08	-0.339034		0.951339	-2.11163	0.536143
2.1025e-08	0.243072	0.245494	0.0641858	0.055292	0.0438325		2.1025e-08	2.39906		0.219469	-0.0554324	-0.19446
2.105e-08	0.24516	0.249282	0.0617094	0.0527172	0.047401		2.105e-08	-0.801603		-0.903946	-1.32105	1.92631
2.1075e-08	0.242883	0.238279	0.0678	0.051633	0.0416779		2.1075e-08	-0.855368		2.12786	-1.81864	-1.3475
2.11e-08	0.239657	0.247478	0.0624456	0.0546144	0.0432265		2.11e-08	-0.607599		-0.395234	-0.212034	-0.398769
2.1125e-08	0.24497	0.239541	0.0604377	0.0550888	0.0467277		2.1125e-08	1.67174		-1.29641	0.0981757	1.68836
2.115e-08	0.232257	0.244953	0.063985	0.0535303	0.0407353		2.115e-08	0.27327		0.506501	-0.646185	-1.75245
2.1175e-08	0.233016	0.255415	0.0624456	0.0548177	0.0434285		2.1175e-08	-1.37494		-0.167541	0.0865562	-0.134002
2.12e-08	0.234723	0.249101	0.0633157	0.0556986	0.0447751		2.12e-08	-1.31993		0.333425	0.609346	0.70133
2.1225e-08	0.242503	0.254513	0.0632488	0.0508199	0.0424859		2.1225e-08	-0.521486		0.377222	-1.86661	-0.58657
2.125e-08	0.237759	0.240083	0.0657921	0.0521073	0.0443711		2.125e-08	0.856812		1.69892	-1.13322	0.564792
2.1275e-08	0.24478	0.23864	0.0587645	0.0542756	0.0432938		2.1275e-08	-1.45822		-1.66849	0.0614104	-0.0164226
2.13e-08	0.235103	0.239	0.0590322	0.0519718	0.0452464		2.13e-08	-0.713398		-1.4637	-1.0787	1.17682
2.1325e-08	0.233395	0.245674	0.0615086	0.0541401	0.0401293		2.1325e-08	-0.0779726		-0.173255	0.118167	-1.77523
2.135e-08	0.232446	0.235032	0.0629141	0.0522429	0.0415432		2.135e-08	-1.40422		0.593198	-0.811953	-0.897977
2.1375e-08	0.230739	0.239902	0.0575597	0.0542756	0.0436978		2.1375e-08	-0.104672		-1.96904	0.316495	0.416192
2.14e-08	0.23757	0.250184	0.0602369	0.0549532	0.0414759		2.14e-08	1.30747		-0.575972	0.735941	-0.842064
2.1425e-08	0.22941	0.251446	0.0643197	0.0504811	0.0414086		2.1425e-08	-1.43418		1.51459	-1.55024	-0.833957
2.145e-08	0.24516	0.237016	0.0609732	0.0545467	0.0397253		2.145e-08	2.25247		-0.063541	0.650432	-1.77846
2.1475e-08	0.242503	0.242067	0.062044	0.053598	0.0434285		2.1475e-08	-0.603866		0.541317	0.214728	0.453372
2.15e-08	0.240036	0.247117	0.0619102	0.0554276	0.0402639		2.15e-08	1.45055		0.550192	1.24285	-1.36679
2.1525e-08	0.235672	0.252348	0.0639181	0.0514297	0.0426879		2.1525e-08	0.173155		1.62179	-0.803392	0.113149
2.155e-08	0.241365	0.248921	0.061174	0.0500068	0.0441018		2.155e-08	-0.550007		0.334189	-1.49363	0.998115
2.1575e-08	0.242883	0.23395	0.0599023	0.0522429	0.0406679		2.1575e-08	-0.105331		-0.224256	-0.249612	-0.986797
2.16e-08	0.240226	0.245313	0.0618433	0.0503456	0.0422165		2.16e-08	-0.607149		0.816105	-1.19246	-0.021642
2.1625e-08	0.238139	0.250364	0.0595676	0.0537336	0.0430245		2.1625e-08	-0.245694		-0.244304	0.665197	0.505731
2.165e-08	0.231308	0.220061	0.0588314	0.0518363	0.0395906		2.165e-08	0.00458245		-0.538712	-0.279007	-1.48567
2.1675e-08	0.238518	0.236114	0.0627803	0.0519041	0.0414086		2.1675e-08	-1.55967		1.5086	-0.18103	-0.358324
2.17e-08	0.238708	0.248921	0.0609732	0.0514975	0.0423512		2.17e-08	-1.19849		0.679269	-0.33531	0.25018
2.1725e-08	0.244401	0.226735	0.0597684	0.0520396	0.039658		2.1725e-08	-0.0259377		0.149641	0.015246	-1.3062
2.175e-08	0.248386	0.24387	0.0558196	0.0515653	0.0397253		2.175e-08	-0.642622		-1.75869	-0.175633	-1.21959
2.1775e-08	0.228272	0.235934	0.057292	0.0506844	0.0426205		2.1775e-08	-0.364128		-0.947991	-0.584244	0.554879
2.18e-08	0.241934	0.22944	0.0599692	0.053327	0.0420145		2.18e-08	-0.589742		0.470455	0.889178	0.240844
2.1825e-08	0.230739	0.245855	0.0574259	0.048245	0.0411392		2.1825e-08	0.27813		-0.737492	-1.76752	-0.235003
2.185e-08	0.222389	0.228358	0.0560873	0.0493969	0.0416779		2.185e-08	0.782326		-1.34107	-1.09107	0.134462
2.1875e-08	0.248575	0.239181	0.0615755	0.0496002	0.0420819		2.1875e-08	1.00625		1.50077	-0.921981	0.42385
2.19e-08	0.233775	0.230523	0.0615755	0.0502778	0.0397253		2.19e-08	0.49942		1.57484	-0.497983	-0.941823
2.1925e-08	0.237759	0.22926	0.0635834	0.0532592	0.0393886		2.1925e-08	0.104224		2.66531	1.16507	-1.09764
2.195e-08	0.225236	0.227095	0.0584298	0.0532592	0.0420819		2.195e-08	-0.516942		0.128991	1.22757	0.566703
2.1975e-08	0.210435	0.234852	0.0576936	0.0502101	0.0438325		2.1975e-08	0.607904		-0.17233	-0.352378	1.66721
2.2e-08	0.217646	0.23395	0.0560203	0.0512265	0.0403313		2.2e-08	-0.324175		-0.950665	0.25633	-0.391902
2.2025e-08	0.218974	0.222947	0.0570912	0.0518363	0.0379074		2.2025e-08	1.47975		-0.335432	0.646664	-1.80595
2.205e-08	0.226374	0.242608	0.058229	0.0494647	0.0425532		2.205e-08	-0.695891		0.315065	-0.573708	1.04122
2.2075e-08	0.224097	0.239722	0.0585637	0.049668	0.0385133		2.2075e-08	0.318992		0.55734	-0.403884	-1.35003
2.21e-08	0.236241	0.220061	0.0574259	0.0494647	0.0421492		2.21e-08	2.60824		0.0482816	-0.454082	0.892392
2.2125e-08	0.241175	0.23431	0.056355	0.0475674	0.0416779		2.2125e-08	-0.421102		-0.427985	-1.4231	0.654701
2.215e-08	0.22998	0.235934	0.0580282	0.0458057	0.0391866		2.215e-08	-0.848864		0.498726	-2.32081	-0.806444
2.2175e-08	0.223338	0.234491	0.0578944	0.0481773	0.038042		2.2175e-08	0.934027		0.501683	-0.974326	-1.45436
2.22e-08	0.228841	0.225652	0.058229	0.0497357	0.0407353		2.22e-08	-0.288047		0.744861	-0.0673322	0.224403
2.2225e-08	0.22201	0.234852	0.0587645	0.0532592	0.0377054		2.2225e-08	0.106452		1.09158	1.91181	-1.56857
2.225e-08	0.238139	0.220782	0.0603708	0.0500745	0.03986		2.225e-08	0.0752373		1.98958	0.23743	-0.214286
2.2275e-08	0.216507	0.220602	0.0567566	0.0525817	0.039456		2.2275e-08	0.0723651		0.201627	1.66605	-0.413994
2.23e-08	0.234534	0.230883	0.055418	0.0519718	0.039254		2.23e-08	1.77708		-0.417942	1.39426	-0.491253
2.2325e-08	0.22998	0.218257	0.0562211	0.0494647	0.0400619		2.2325e-08	-1.38616		0.06607	0.083721	0.0467239
2.235e-08	0.221251	0.230342	0.0548156	0.0496002	0.0379074		2.235e-08	0.547927		-0.590259	0.217391	-1.22166
2.2375e-08	0.230169	0.222225	0.0571582	0.0524461	0.0437651		2.2375e-08	1.20118		0.690713	1.83724	2.39988
2.24e-08	0.220682	0.231244	0.0546148	0.0489904	0.0393886		2.24e-08	0.998847		-0.556115	0.00173246	-0.226845
2.2425e-08	0.226564	0.227095	0.0549495	0.0474319	0.039254		2.2425e-08	-2.08947		-0.31355	-0.795397	-0.263598
2.245e-08	0.224667	0.227997	0.0550833	0.0491937	0.0412066		2.245e-08	-1.55148		-0.174773	0.232031	0.977625
2.2475e-08	0.218025	0.223307	0.054414	0.0469576	0.0391193		2.2475e-08	-1.89977		-0.453356	-0.939972	-0.254982
2.25e-08	0.233395	0.236114	0.0568904	0.0503456	0.0393886		2.25e-08	-1.96229		0.904433	0.98579	-0.0442903
2.2525e-08	0.221061	0.212304	0.0564889	0.0489226	0.0401966		2.2525e-08	-1.9963		0.765456	0.260375	0.497414
2.255e-08	0.230549	0.227095	0.0530754	0.0477029	0.0370994		2.255e-08	0.57941		-0.945559	-0.354568	-1.36035
2.2575e-08	0.217456	0.220602	0.0560873	0.0481095	0.03784		2.2575e-08	0.575887		0.695369	-0.0715816	-0.860589
2.26e-08	0.219543	0.223127	0.0586306	0.0483805	0.0395233		2.26e-08	0.687157		2.09499	0.136806	0.220467
2.2625e-08	0.223148	0.215732	0.0541463	0.0487193	0.0401293		2.2625e-08	0.108584		-0.182012	0.383073	0.639435
2.265e-08	0.221441	0.212846	0.0539455	0.0498713	0.0397253		2.265e-08	-0.586079		-0.218993	1.081	0.436012
2.2675e-08	0.219353	0.22457	0.0521384	0.0467543	0.0366954		2.2675e-08	-2.77897		-1.0993	-0.591161	-1.38945
2.27e-08	0.238329	0.216633	0.0558865	0.0502101	0.0367627		2.27e-08	-1.48915		0.93747	1.38833	-1.30395
2.2725e-08	0.231118	0.226013	0.0508667	0.0491937	0.0401293		2.2725e-08	1.73439		-1.63415	0.882125	0.822853
2.275e-08	0.225426	0.225652	0.0536778	0.0476352	0.039052		2.275e-08	-0.548572		-0.087117	0.072487	0.201546
2.2775e-08	0.225046	0.228358	0.0548825	0.0432985	0.0406006		2.2775e-08	-1.6511		0.616161	-2.28931	1.20662
2.28e-08	0.218594	0.226554	0.054481	0.0469576	0.0364934		2.28e-08	-0.241101		0.472627	-0.190213	-1.29568
2.2825e-08	0.2222	0.222586	0.0538786	0.0458057	0.038042		2.2825e-08	-2.50206		0.222327	-0.777019	-0.290416
2.285e-08	0.223718	0.226193	0.0489258	0.0466865	0.0379747		2.285e-08	-0.309222		-2.33148	-0.227306	-0.287868
2.2875e-08	0.207589	0.225292	0.0557526	0.0447215	0.03986		2.2875e-08	0.148892		1.35087	-1.27142	0.92947
2.29e-08	0.202845	0.217175	0.0546148	0.0456701	0.0362914		2.29e-08	-0.0301642		0.816114	-0.683272	-1.24743
2.2925e-08	0.211574	0.22908	0.0526069	0.0453313	0.0369647		2.2925e-08	-0.354668		-0.182217	-0.816993	-0.784308
2.295e-08	0.22163	0.222406	0.0509337	0.0463477	0.038648		2.295e-08	-2.65397		-1.00507	-0.189135	0.309771
2.2975e-08	0.213471	0.220241	0.0550164	0.0430275	0.03986		2.2975e-08	-0.0466496		1.23483	-2.00096	1.11147
2.3e-08	0.213661	0.21501	0.0531424	0.0453313	0.038446		2.3e-08	2.01213		0.30426	-0.647878	0.273103
2.3025e-08	0.205691	0.207254	0.0558865	0.0449248	0.0357528		2.3025e-08	-0.698198		1.8361	-0.820976	-1.36741
2.305e-08	0.21442	0.224029	0.0507329	0.0464833	0.0360221		2.305e-08	-1.92754		-0.849076	0.114976	-1.15578
2.3075e-08	0.213281	0.217716	0.0508667	0.0439084	0.0375707		2.3075e-08	0.338377		-0.712045	-1.28389	-0.141975
2.31e-08	0.204363	0.216092	0.051536	0.0458057	0.0391193		2.31e-08	-1.32969		-0.288091	-0.155047	0.873605
2.3125e-08	0.213661	0.222045	0.0513353	0.0447215	0.0368974		2.3125e-08	-0.227579		-0.329909	-0.712989	-0.476969
2.315e-08	0.213851	0.225292	0.0548825	0.0470931	0.037032		2.315e-08	-1.13942		1.64047	0.687698	-0.348775
2.3175e-08	0.213281	0.219159	0.0531424	0.0453991	0.0364261		2.3175e-08	-0.240352		0.7731	-0.216966	-0.686397
2.32e-08	0.20645	0.21483	0.0523392	0.0453313	0.0381093		2.32e-08	0.221161		0.407856	-0.199356	0.417
2.3225e-08	0.213661	0.216092	0.0491935	0.0439761	0.0381767		2.3225e-08	0.331975		-1.22068	-0.914378	0.503751
2.325e-08	0.222579	0.21988	0.050666	0.0458734	0.0393886		2.325e-08	-1.63736		-0.361893	0.221538	1.31275
2.3275e-08	0.203414	0.221323	0.050666	0.0435696	0.0358874		2.3275e-08	-0.56028		-0.296647	-1.03591	-0.853414
2.33e-08	0.200758	0.219159	0.0507329	0.0458734	0.0340695		2.33e-08	-1.0075		-0.195338	0.333969	-1.95972
2.3325e-08	0.208538	0.215732	0.0510006	0.0450603	0.0361567		2.3325e-08	-1.13243		0.0146613	-0.0746202	-0.597381
2.335e-08	0.216697	0.225652	0.0540794	0.0442472	0.0393886		2.335e-08	-0.699246		1.74865	-0.484257	1.49225
2.3375e-08	0.219353	0.209418	0.0507998	0.0454669	0.0369647		2.3375e-08	-0.824339		0.0360393	0.269268	0.000596906
2.34e-08	0.210815	0.214649	0.0491266	0.0452636	0.037436		2.34e-08	-1.5973		-0.808001	0.208521	0.343027
2.3425e-08	0.197911	0.204007	0.0489927	0.0442472	0.0359548		2.3425e-08	0.426796		-0.816771	-0.31911	-0.553962
2.345e-08	0.208917	0.217896	0.0518707	0.0441117	0.0362914		2.345e-08	0.0660982		0.814599	-0.341856	-0.297118
2.3475e-08	0.20664	0.221323	0.0528077	0.0451281	0.0326555		2.3475e-08	0.324297		1.39136	0.297781	-2.56732
2.35e-08	0.207399	0.210681	0.0526069	0.0432308	0.0373687		2.35e-08	-0.627636		1.34814	-0.739036	0.475002
2.3525e-08	0.213661	0.217896	0.0472525	0.0451281	0.039456		2.3525e-08	-1.13787		-1.51209	0.408916	1.84904
2.355e-08	0.211384	0.217535	0.0483903	0.0472964	0.0370994		2.355e-08	-0.081798		-0.826933	1.71551	0.390301
2.3575e-08	0.21442	0.203105	0.050599	0.0432985	0.0342715		2.3575e-08	-0.888415		0.44625	-0.537151	-1.37224
2.36e-08	0.211004	0.213928	0.0471856	0.0419434	0.0368301		2.36e-08	-0.156435		-1.36134	-1.26666	0.304761
2.3625e-08	0.205881	0.220061	0.0493274	0.0472286	0.0383787		2.3625e-08	-0.164365		-0.122897	1.84622	1.33863
2.365e-08	0.20645	0.200039	0.0475202	0.042892	0.0347428		2.365e-08	-0.528341		-1.05259	-0.610284	-0.945567
2.3675e-08	0.198291	0.210501	0.0499967	0.0432985	0.0385807		2.3675e-08	-0.210315		0.373097	-0.320473	1.55624
2.37e-08	0.218594	0.203105	0.0491266	0.0440439	0.037436		2.37e-08	-0.0701282		-0.0420652	0.166635	0.866138
2.3725e-08	0.197911	0.204368	0.0475202	0.0442472	0.0362914		2.3725e-08	0.902543		-0.864536	0.339525	0.174689
2.375e-08	0.20664	0.20545	0.0492604	0.0430275	0.0348775		2.375e-08	-0.949545		0.159289	-0.315539	-0.691249
2.3775e-08	0.206071	0.20527	0.0493943	0.041198	0.0364261		2.3775e-08	0.0238352		0.296966	-1.32752	0.346949
2.38e-08	0.20702	0.197153	0.0490596	0.0420789	0.0352814		2.38e-08	0.134611		0.175302	-0.761062	-0.347288
2.3825e-08	0.20683	0.204007	0.0461816	0.0435696	0.0349448		2.3825e-08	-0.0824935		-1.35665	0.162479	-0.522193
2.385e-08	0.193357	0.198776	0.0452446	0.0422144	0.0335308		2.385e-08	-1.91138		-1.81526	-0.575573	-1.39248
2.3875e-08	0.203414	0.201843	0.0508667	0.0425532	0.0346081		2.3875e-08	-0.816616		1.36911	-0.324145	-0.65589
2.39e-08	0.200378	0.209959	0.0487919	0.0422144	0.0369647		2.39e-08	-1.24447		0.279452	-0.469166	0.908773
2.3925e-08	0.208158	0.220782	0.0482565	0.0439761	0.0350795		2.3925e-08	0.450393		0.0444178	0.617112	-0.267682
2.395e-08	0.201517	0.208336	0.0510006	0.0446537	0.0363587		2.395e-08	-0.486187		1.63723	1.06924	0.602595
2.3975e-08	0.196204	0.209599	0.0497959	0.0416723	0.0355508		2.3975e-08	-0.855147		1.02938	-0.627874	0.121721
2.4e-08	0.200188	0.204729	0.0497959	0.0444505	0.0329922		2.4e-08	1.56309		1.09317	1.05925	-1.49569
2.4025e-08	0.185578	0.203286	0.0459809	0.0422144	0.0343388		2.4025e-08	-2.16489		-0.977662	-0.202951	-0.580742
2.405e-08	0.203794	0.201301	0.0451777	0.0445182	0.0322515		2.405e-08	-1.33523		-1.36649	1.2082	-1.89576
2.4075e-08	0.190701	0.208877	0.0449769	0.041469	0.0346081		2.4075e-08	-0.324096		-1.41865	-0.536778	-0.322831
2.41e-08	0.197722	0.214469	0.046784	0.0439084	0.0327229		2.41e-08	-2.16795		-0.343764	0.956725	-1.50875
2.4125e-08	0.179695	0.205089	0.045847	0.0417401	0.037032		2.4125e-08	0.0174302		-0.809034	-0.271573	1.33962
2.415e-08	0.197342	0.20527	0.0456462	0.0403171	0.0327902		2.415e-08	-0.413871		-0.861178	-1.06132	-1.38413
2.4175e-08	0.19886	0.198776	0.0461147	0.0399783	0.0340022		2.4175e-08	0.540336		-0.536442	-1.21031	-0.552508
2.42e-08	0.203604	0.209779	0.0434375	0.0435696	0.0361567		2.42e-08	-0.524781		-1.98547	0.971852	0.896531
2.4225e-08	0.205122	0.192643	0.0495951	0.0405204	0.0352141		2.4225e-08	-0.776669		1.55126	-0.785156	0.322483
2.425e-08	0.201327	0.202203	0.0476541	0.0428242	0.0340022		2.425e-08	-1.84454		0.517196	0.636424	-0.42903
2.4275e-08	0.201517	0.199317	0.0464494	0.0430953	0.0339348		2.4275e-08	-3.24658		-0.102785	0.851001	-0.432062
2.43e-08	0.193927	0.21014	0.0460478	0.0408592	0.0358201		2.43e-08	0.612901		-0.269312	-0.427864	0.845325
2.4325e-08	0.196204	0.190659	0.0450438	0.0418756	0.0342041		2.4325e-08	-0.30512		-0.77822	0.230184	-0.173354
2.435e-08	0.184439	0.199317	0.0468509	0.0419434	0.0331269		2.435e-08	-0.861057		0.308232	0.323096	-0.840092
2.4375e-08	0.201707	0.20527	0.046784	0.0416046	0.0335982		2.4375e-08	-0.659947		0.331338	0.173099	-0.489727
2.44e-08	0.203604	0.197153	0.0481895	0.042621	0.0339348		2.44e-08	-0.367623		1.1927	0.83351	-0.22742
2.4425e-08	0.194496	0.203466	0.0488588	0.0393007	0.0338675		2.4425e-08	0.228694		1.63632	-1.1021	-0.230839
2.445e-08	0.20702	0.21014	0.0453116	0.0386909	0.0355508		2.445e-08	0.126867		-0.325332	-1.41683	0.92007
2.4475e-08	0.196204	0.204548	0.048725	0.0424854	0.0352814		2.4475e-08	1.18048		1.68507	0.911188	0.784251
2.45e-08	0.196583	0.197153	0.0453116	0.0435018	0.0343388		2.45e-08	-0.0470182		-0.204857	1.57476	0.203274
2.4525e-08	0.200378	0.202203	0.0457801	0.0418078	0.0345408		2.4525e-08	0.855674		0.123531	0.609327	0.377965
2.455e-08	0.182352	0.201843	0.0471856	0.0372679	0.0294236		2.455e-08	0.448982		0.989612	-2.07188	-2.96752
2.4575e-08	0.18349	0.194627	0.0452446	0.0369969	0.0346081		2.4575e-08	-2.33777		-0.0632812	-2.18591	0.504897
2.46e-08	0.192788	0.199678	0.0480557	0.0382166	0.0339348		2.46e-08	0.396746		1.6118	-1.40088	0.0996268
2.4625e-08	0.204363	0.204909	0.045847	0.0409947	0.0350121		2.4625e-08	-2.42503		0.402857	0.327006	0.855301
2.465e-08	0.187096	0.18633	0.0441068	0.0388942	0.0343388		2.465e-08	1.53632		-0.539151	-0.891398	0.449474
2.4675e-08	0.192978	0.207975	0.0453785	0.0399783	0.0323189		2.4675e-08	0.607948		0.253217	-0.184824	-0.852423
2.47e-08	0.17571	0.198055	0.04491	0.0422822	0.0350795		2.47e-08	-0.75062		0.0427659	1.26217	1.02441
2.4725e-08	0.203604	0.186691	0.0441738	0.0422144	0.0327902		2.4725e-08	1.13695		-0.323032	1.27363	-0.458837
2.475e-08	0.195065	0.189938	0.0444415	0.0379455	0.0336655		2.475e-08	-1.6341		-0.108985	-1.26588	0.16478
2.4775e-08	0.19924	0.187593	0.0435714	0.0410625	0.0319822		2.4775e-08	1.66733		-0.553774	0.678333	-0.917829
2.48e-08	0.195634	0.188675	0.0453116	0.0379455	0.0320496		2.48e-08	-2.1826		0.513936	-1.16664	-0.833369
2.4825e-08	0.19146	0.194447	0.0464494	0.0380133	0.0318476		2.4825e-08	-0.382786		1.23414	-1.07586	-0.928908
2.485e-08	0.200378	0.204187	0.0443076	0.0397073	0.0331942		2.485e-08	-1.07193		0.0495359	0.00652618	0.0114159
2.4875e-08	0.19924	0.197694	0.0442407	0.0387586	0.0328575		2.4875e-08	-0.777138		0.0694698	-0.521912	-0.173886
2.49e-08	0.195255	0.192463	0.0424336	0.0406559	0.0325209		2.49e-08	0.904303		-0.924469	0.687328	-0.359581
2.4925e-08	0.187855	0.190298	0.0427682	0.0371324	0.0328575		2.4925e-08	-1.20398		-0.67158	-1.41657	-0.0939426
2.495e-08	0.191839	0.201662	0.0445084	0.0363193	0.0334635		2.495e-08	-2.2048		0.40252	-1.86541	0.352978
2.4975e-08	0.193357	0.201121	0.0453785	0.0378778	0.0314436		2.4975e-08	-0.737034		0.970298	-0.861675	-0.964251
2.5e-08	0.177987	0.203105	0.0449769	0.0374712	0.0332615		2.5e-08	0.516602		0.794922	-1.06167	0.297826
2.5025e-08	0.205312	0.199317	0.0428352	0.0400461	0.0360894		2.5025e-08	-1.41309		-0.400724	0.568953	2.2421
2.505e-08	0.181213	0.186871	0.0451108	0.0399783	0.0329922		2.505e-08	-1.45794		0.991907	0.577964	0.196618
2.5075e-08	0.181024	0.196972	0.0428352	0.039233	0.0335308		2.5075e-08	-1.75069		-0.285326	0.169764	0.599867
2.51e-08	0.181783	0.187232	0.0459139	0.0405204	0.0352814		2.51e-08	-0.122302		1.58243	1.01304	1.822
2.5125e-08	0.197152	0.19102	0.0431698	0.0400461	0.0323189		2.5125e-08	-0.0734719		0.0268722	0.771354	-0.138698
2.515e-08	0.18406	0.183083	0.0443076	0.038081	0.0327902		2.515e-08	-0.955934		0.755221	-0.391302	0.219571
2.5175e-08	0.185767	0.18633	0.0406934	0.0405882	0.0291543		2.5175e-08	1.26667		-1.31834	1.20759	-2.20203
2.52e-08	0.188614	0.196972	0.0404257	0.0383521	0.0333288		2.52e-08	-0.859863		-1.42019	-0.12487	0.664171
2.5225e-08	0.179126	0.200399	0.0438391	0.037539	0.0343388		2.5225e-08	-0.220703		0.654269	-0.578906	1.38928
2.525e-08	0.182542	0.189938	0.040158	0.0366581	0.0356854		2.525e-08	1.16663		-1.46655	-1.07604	2.34413
2.5275e-08	0.181783	0.204548	0.0403587	0.0367936	0.0313762		2.5275e-08	0.37487		-1.29179	-0.943586	-0.542103
2.53e-08	0.185388	0.198596	0.0425005	0.0376745	0.0321169		2.53e-08	0.891554		0.0347537	-0.347967	0.000385607
2.5325e-08	0.187475	0.193545	0.0441068	0.0407914	0.0322515		2.5325e-08	-0.837909		1.04605	1.63938	0.131279
2.535e-08	0.19127	0.187052	0.0412958	0.036116	0.027673		2.535e-08	0.771561		-0.567422	-1.22056	-2.94856
2.5375e-08	0.184249	0.198055	0.0434375	0.0365226	0.0317129		2.5375e-08	0.164333		0.763949	-0.919389	-0.157423
2.54e-08	0.195255	0.18651	0.0394217	0.0378778	0.0333288		2.54e-08	0.338009		-1.57179	-0.0258607	0.984401
2.5425e-08	0.186716	0.178213	0.0390201	0.0372679	0.0303663		2.5425e-08	-1.39754		-1.75633	-0.357715	-0.999313
2.545e-08	0.179885	0.194086	0.0431029	0.0393685	0.0317802		2.545e-08	-0.880408		0.737438	1.00407	0.00560942
2.5475e-08	0.191839	0.192463	0.0412958	0.0371324	0.0335308		2.5475e-08	0.671942		-0.285693	-0.345266	1.24266
2.55e-08	0.184819	0.19102	0.0423666	0.0355739	0.0322515		2.55e-08	-0.910648		0.411812	-1.27307	0.406542
2.5525e-08	0.178936	0.18633	0.0425674	0.0325247	0.0333288		2.5525e-08	-2.02473		0.589135	-3.13779	1.18437
2.555e-08	0.195824	0.191381	0.0388194	0.0397073	0.0321169		2.555e-08	-0.689795		-1.60304	1.41636	0.392653
2.5575e-08	0.18368	0.192282	0.0429021	0.034693	0.0323862		2.5575e-08	-1.11374		0.904095	-1.6846	0.61672
2.56e-08	0.185578	0.191381	0.0425005	0.0384198	0.0311069		2.56e-08	0.632864		0.719668	0.706348	-0.223415
2.5625e-08	0.178557	0.183264	0.0378823	0.0361838	0.028683		2.5625e-08	-3.12899		-2.0042	-0.652616	-1.85264
2.565e-08	0.173623	0.18651	0.0397564	0.0355739	0.0331269		2.565e-08	-1.72816		-0.820815	-0.989387	1.24448
2.5675e-08	0.173244	0.191741	0.0405595	0.0383521	0.0332615		2.5675e-08	-0.262236		-0.281096	0.81086	1.37704
2.57e-08	0.187096	0.183805	0.0389532	0.0393685	0.0331269		2.57e-08	0.0695528		-1.19596	1.50196	1.32398
2.5725e-08	0.18387	0.191381	0.0422328	0.0343542	0.0299623		2.5725e-08	0.654468		0.842183	-1.61871	-0.821314
2.575e-08	0.192219	0.180558	0.0388863	0.036116	0.0318476		2.575e-08	-0.90931		-1.12752	-0.457154	0.519377
2.5775e-08	0.18349	0.185428	0.0396225	0.0379455	0.0289523		2.5775e-08	-0.387612		-0.626882	0.749555	-1.4444
2.58e-08	0.190511	0.185609	0.0421659	0.0381488	0.0308376		2.58e-08	-1.19482		0.971378	0.92713	-0.102106
2.5825e-08	0.176469	0.188134	0.0397564	0.0372679	0.0321169		2.5825e-08	0.11942		-0.436184	0.416576	0.822563
2.585e-08	0.184629	0.181279	0.0389532	0.032728	0.0311743		2.585e-08	-1.98873		-0.870017	-2.42065	0.207728
2.5875e-08	0.166982	0.183624	0.0400241	0.0335411	0.0285483		2.5875e-08	-1.46655		-0.163774	-1.85821	-1.57679
2.59e-08	0.176659	0.190298	0.0363429	0.0368614	0.0315782		2.59e-08	-0.340347		-2.35299	0.30198	0.565164
2.5925e-08	0.18349	0.188855	0.041028	0.0373357	0.0292217		2.5925e-08	-0.833255		0.558781	0.65225	-1.03502
2.595e-08	0.189183	0.176409	0.0388863	0.0363193	0.0314436		2.595e-08	-0.786353		-0.694161	0.0518524	0.548762
2.5975e-08	0.183301	0.186871	0.0398233	0.0368614	0.0287503		2.5975e-08	-1.2805		-0.0668098	0.44571	-1.28895
2.6e-08	0.173433	0.182722	0.0409611	0.0357094	0.030097		2.6e-08	-0.756226		0.684736	-0.243028	-0.313057
2.6025e-08	0.177228	0.17677	0.0384847	0.0349641	0.0307703		2.6025e-08	0.0238003		-0.777966	-0.6731	0.194546
2.605e-08	0.178746	0.174245	0.0426344	0.0351674	0.0305683		2.605e-08	-0.215796		1.82254	-0.496358	0.091501
2.6075e-08	0.173244	0.191922	0.0363429	0.0361838	0.0314436		2.6075e-08	0.278421		-1.98665	0.202154	0.741364
2.61e-08	0.185578	0.183624	0.0418312	0.0376067	0.0302989		2.61e-08	-0.664315		1.44135	1.16301	-0.0212146
2.6125e-08	0.182731	0.187052	0.0409611	0.0339477	0.029491		2.6125e-08	0.181813		0.961399	-1.14072	-0.549425
2.615e-08	0.169259	0.189216	0.0404926	0.0355739	0.0333962		2.615e-08	-0.986611		0.727848	-0.0486578	2.22542
2.6175e-08	0.166033	0.18615	0.0392879	0.0366581	0.0305683		2.6175e-08	0.628808		0.0393056	0.696444	0.280893
2.62e-08	0.17609	0.1912	0.0402249	0.0348286	0.0289523		2.62e-08	-0.381017		0.672469	-0.435515	-0.816018
2.6225e-08	0.17571	0.180558	0.0392879	0.0379455	0.0296256		2.6225e-08	-0.0455768		0.147717	1.62249	-0.305832
2.625e-08	0.182162	0.180558	0.0398233	0.0333379	0.0334635		2.625e-08	-0.608265		0.533447	-1.30587	2.43151
2.6275e-08	0.171536	0.173884	0.0393548	0.0349641	0.0290197		2.6275e-08	0.0807024		0.297434	-0.208901	-0.657947
2.63e-08	0.186906	0.176229	0.0402249	0.0359127	0.0285483		2.63e-08	-0.0971298		0.89146	0.451485	-0.95328
2.6325e-08	0.182921	0.179656	0.0398233	0.034693	0.0276057		2.6325e-08	0.175028		0.696487	-0.292058	-1.58171
2.635e-08	0.169828	0.176049	0.0369453	0.0333379	0.0313089		2.635e-08	-0.228459		-1.03945	-1.12515	1.06873
2.6375e-08	0.16812	0.182903	0.036276	0.0372679	0.0313089		2.6375e-08	-2.91984		-1.404	1.4719	1.10694
2.64e-08	0.176659	0.177672	0.0385516	0.0359805	0.0307703		2.64e-08	-1.10206		0.0664146	0.682779	0.764187
2.6425e-08	0.175141	0.184166	0.0368115	0.0350318	0.0267304		2.6425e-08	-1.8949		-0.966221	0.112432	-2.05774
2.645e-08	0.170018	0.172441	0.0386855	0.036116	0.028683		2.645e-08	-1.49441		0.256895	0.864869	-0.638866
2.6475e-08	0.164325	0.175327	0.0370792	0.0321859	0.0281444		2.6475e-08	0.199076		-0.694305	-1.65047	-0.98423
2.65e-08	0.174003	0.174605	0.0394217	0.036116	0.0292217		2.65e-08	-1.75886		0.824931	0.958874	-0.183316
2.6525e-08	0.181593	0.190118	0.0393548	0.0343542	0.0311743		2.6525e-08	1.29601		0.836885	-0.145197	1.24074
2.655e-08	0.173623	0.173523	0.0380162	0.0347608	0.0284137		2.655e-08	-0.307904		0.0505817	0.166349	-0.684083
2.6575e-08	0.173813	0.184346	0.0392209	0.0325247	0.029895		2.6575e-08	0.840468		0.860247	-1.2516	0.406403
2.66e-08	0.171156	0.173523	0.0384847	0.0352351	0.0318476		2.66e-08	2.54187		0.450745	0.568887	1.83445
2.6625e-08	0.172485	0.17208	0.0361422	0.0390974	0.029895		2.6625e-08	-1.04492		-0.971221	3.14859	0.480812
2.665e-08	0.17571	0.181279	0.0385516	0.034151	0.0289523		2.665e-08	-0.771823		0.599055	-0.050683	-0.154598
2.6675e-08	0.166982	0.166489	0.0408942	0.0308985	0.0273364		2.6675e-08	-0.108326		2.1305	-2.14304	-1.27205
2.67e-08	0.175331	0.177852	0.0376146	0.032457	0.0327902		2.67e-08	0.198239		0.113439	-1.07428	2.66212
2.6725e-08	0.166033	0.174245	0.0382839	0.034693	0.0310396		2.6725e-08	1.09121		0.589282	0.442858	1.44874
2.675e-08	0.172105	0.177492	0.0386855	0.0328635	0.0281444		2.675e-08	-0.555816		0.896507	-0.717498	-0.586538
2.6775e-08	0.175141	0.180738	0.0395556	0.0345575	0.0279424		2.6775e-08	-0.0534171		1.50118	0.445033	-0.695215
2.68e-08	0.171726	0.174966	0.0337327	0.0323215	0.0295583		2.68e-08	1.20019		-2.14012	-0.986588	0.499908
2.6825e-08	0.167172	0.178213	0.038217	0.0368614	0.0298276		2.6825e-08	-0.0914171		0.758092	2.0597	0.73018
2.685e-08	0.165464	0.160175	0.040158	0.0323215	0.0270671		2.685e-08	-0.764149		2.04509	-0.898513	-1.21657
2.6875e-08	0.167741	0.175327	0.0358075	0.0338799	0.0307703		2.6875e-08	-0.914735		-0.670675	0.178202	1.48227
2.69e-08	0.173433	0.173523	0.0386186	0.0349641	0.0295583		2.69e-08	-0.509269		1.17194	0.942401	0.647463
2.6925e-08	0.170208	0.167571	0.0354729	0.034422	0.0270671		2.6925e-08	1.50162		-0.782253	0.62831	-1.11061
2.695e-08	0.164705	0.165406	0.0354729	0.031034	0.0303663		2.695e-08	-1.10624		-0.731463	-1.57799	1.30399
2.6975e-08	0.16812	0.163963	0.0350713	0.0322537	0.0303663		2.6975e-08	-0.142608		-0.937471	-0.723293	1.34145
2.7e-08	0.170777	0.171539	0.0358744	0.0315761	0.0286157		2.7e-08	-1.44267		-0.372847	-1.13055	0.114205
2.7025e-08	0.164515	0.183444	0.0345358	0.0334056	0.0261918		2.7025e-08	-1.5949		-1.17979	0.132598	-1.60216
2.705e-08	0.175521	0.168653	0.035339	0.0328635	0.0271344		2.705e-08	0.849902		-0.614579	-0.184502	-0.885282
2.7075e-08	0.169069	0.166128	0.0354729	0.0308985	0.028481		2.7075e-08	-1.14342		-0.478198	-1.45291	0.125372
2.71e-08	0.170777	0.165226	0.0341343	0.0315083	0.028481		2.71e-08	-1.52642		-1.28845	-1.00226	0.161459
2.7125e-08	0.167172	0.177131	0.0358744	0.0334734	0.0264611		2.7125e-08	-0.196612		-0.118781	0.356284	-1.26813
2.715e-08	0.17571	0.169014	0.0366776	0.0334056	0.0263938		2.715e-08	-0.183963		0.449544	0.3555	-1.28221
2.7175e-08	0.163377	0.162881	0.0370792	0.0313728	0.027471		2.7175e-08	-2.6465		0.759978	-0.96326	-0.464354
2.72e-08	0.153699	0.174605	0.0367445	0.0325925	0.0281444		2.72e-08	0.468606		0.595543	-0.101162	0.0609914
2.7225e-08	0.169259	0.169014	0.0352051	0.0338799	0.0270671		2.7225e-08	0.382381		-0.348267	0.808122	-0.687517
2.725e-08	0.170397	0.168653	0.0355398	0.0328635	0.0259224		2.725e-08	-2.74703		-0.0813526	0.169304	-1.4865
2.7275e-08	0.161479	0.168112	0.0371461	0.0300854	0.028481		2.7275e-08	0.209405		1.00993	-1.65729	0.41428
2.73e-08	0.164705	0.165587	0.0355398	0.0332023	0.0305009		2.73e-08	0.354548		0.0195025	0.485933	1.92503
2.7325e-08	0.158064	0.160536	0.0370122	0.0336766	0.0267977		2.7325e-08	-0.66043		1.02598	0.850236	-0.743677
2.735e-08	0.165654	0.169194	0.0338665	0.0338799	0.0298276		2.735e-08	0.512609		-0.967647	1.03209	1.50716
2.7375e-08	0.155597	0.161258	0.0356067	0.0328635	0.0285483		2.7375e-08	0.259669		0.213923	0.389608	0.607568
2.74e-08	0.172295	0.175507	0.0389532	0.035845	0.0276057		2.74e-08	-0.591832		2.4445	2.45133	-0.0470021
2.7425e-08	0.165464	0.159634	0.0308547	0.0311018	0.0261244		2.7425e-08	-0.347425		-2.78466	-0.715791	-1.09774
2.745e-08	0.16072	0.169014	0.0351382	0.0321182	0.0288177		2.745e-08	-1.30068		0.0591645	0.0163265	0.913414
2.7475e-08	0.152181	0.170276	0.0321933	0.0325247	0.0266631		2.7475e-08	-1.75592		-1.81565	0.335875	-0.633012
2.75e-08	0.162238	0.160897	0.0354059	0.0314406	0.0273364		2.75e-08	0.620866		0.334466	-0.356956	-0.103134
2.7525e-08	0.162238	0.174605	0.0319256	0.0320504	0.0261244		2.7525e-08	0.866691		-1.89524	0.100846	-0.959708
2.755e-08	0.158064	0.169375	0.0333311	0.0311018	0.0287503		2.755e-08	0.745707		-0.925945	-0.501651	1.00868
2.7575e-08	0.166413	0.168292	0.0346028	0.0315761	0.0250471		2.7575e-08	-1.68025		-0.0425954	-0.135736	-1.68502
2.76e-08	0.163187	0.161438	0.0356067	0.0314406	0.0272017		2.76e-08	-1.20177		0.666588	-0.18523	-0.0617296
2.7625e-08	0.161859	0.168292	0.0377485	0.0323892	0.0284137		2.7625e-08	-0.655771		2.12579	0.505419	0.868266
2.765e-08	0.170397	0.163422	0.0359414	0.0272395	0.0280097		2.765e-08	0.158772		0.987221	-2.97113	0.605544
2.7675e-08	0.177608	0.162159	0.0331303	0.0313728	0.0265284		2.7675e-08	0.672919		-0.815844	-0.102949	-0.454568
2.77e-08	0.161669	0.161618	0.0357406	0.02934	0.0281444		2.77e-08	0.718363		0.955521	-1.45233	0.776492
2.7725e-08	0.167931	0.168473	0.032461	0.029069	0.0253165		2.7725e-08	0.159852		-1.16127	-1.59665	-1.28328
2.775e-08	0.158823	0.164504	0.0346697	0.0302887	0.0259224		2.775e-08	-0.668177		0.347673	-0.718335	-0.799973
2.7775e-08	0.157874	0.166489	0.0345358	0.0290012	0.0259224		2.7775e-08	1.29163		0.30843	-1.56069	-0.765743
2.78e-08	0.165464	0.163602	0.0340004	0.0323215	0.0244412		2.78e-08	0.967574		0.00268654	0.763531	-1.83208
2.7825e-08	0.1611	0.156928	0.0318586	0.0271039	0.0292217		2.7825e-08	1.04683		-1.36994	-2.78446	1.75587
2.785e-08	0.167931	0.175147	0.0318586	0.0301531	0.0260571		2.785e-08	-0.221069		-1.32274	-0.643835	-0.56306
2.7875e-08	0.171156	0.165045	0.0358744	0.0325247	0.0275384		2.7875e-08	-1.82804		1.39533	1.03362	0.574547
2.79e-08	0.15332	0.162159	0.0342012	0.0303564	0.0262591		2.79e-08	0.745099		0.331364	-0.41987	-0.344024
2.7925e-08	0.152181	0.156027	0.0335988	0.0296111	0.027673		2.7925e-08	0.385217		-0.0212007	-0.892962	0.745429
2.795e-08	0.174762	0.16234	0.0335319	0.0295433	0.0265957		2.795e-08	-0.921176		-0.0173284	-0.898329	-0.0238165
2.7975e-08	0.164136	0.1719	0.0302523	0.0298143	0.0263264		2.7975e-08	-1.48584		-2.15953	-0.669192	-0.190509
2.8e-08	0.157684	0.166128	0.0304531	0.0306952	0.0246431		2.8e-08	-2.11907		-1.97919	-0.017027	-1.4154
2.8025e-08	0.151802	0.156748	0.0342012	0.0285947	0.0258551		2.8025e-08	-0.180081		0.576011	-1.43224	-0.474607
2.805e-08	0.151991	0.165587	0.0341343	0.0326603	0.028279		2.805e-08	-0.3051		0.579924	1.43191	1.37601
2.8075e-08	0.166413	0.162159	0.0340673	0.0321182	0.0262591		2.8075e-08	-1.10854		0.583674	1.09846	-0.103539
2.81e-08	0.162997	0.155305	0.0309216	0.0279848	0.0270671		2.81e-08	-0.318332		-1.48039	-1.73479	0.537287
2.8125e-08	0.1611	0.161618	0.0344689	0.0287302	0.0271344		2.8125e-08	0.371091		0.950802	-1.17547	0.622651
2.815e-08	0.148766	0.15765	0.0346028	0.0306275	0.0231619		2.815e-08	0.177814		1.08978	0.188048	-2.33004
2.8175e-08	0.160151	0.155666	0.0339335	0.0290012	0.0261918		2.8175e-08	-0.287943		0.687842	-0.904935	-0.0171836
2.82e-08	0.15294	0.154584	0.0310555	0.0301531	0.027673		2.82e-08	-0.788519		-1.20478	-0.059279	1.133
2.8225e-08	0.148955	0.162881	0.0293153	0.0285947	0.0243065		2.8225e-08	-0.472406		-2.33331	-1.10742	-1.37017
2.825e-08	0.151043	0.164144	0.0350044	0.0306952	0.0245758		2.825e-08	0.525904		1.55735	0.403562	-1.13391
2.8275e-08	0.15332	0.159454	0.0330634	0.0285269	0.0258551		2.8275e-08	-2.29509		0.293174	-1.07376	-0.134495
2.83e-08	0.155407	0.157289	0.0350713	0.0317794	0.0251145		2.83e-08	0.512684		1.70106	1.24788	-0.660457
2.8325e-08	0.155407	0.150435	0.0321933	0.0266974	0.0271344		2.8325e-08	-2.10767		-0.201457	-2.2774	0.901294
2.835e-08	0.153889	0.154223	0.0338665	0.0286624	0.0268651		2.835e-08	1.69591		0.981443	-0.857373	0.732066
2.8375e-08	0.153509	0.177311	0.0323272	0.0298821	0.0228252		2.8375e-08	0.201492		-0.0164812	0.0410446	-2.29534
2.84e-08	0.161289	0.150615	0.0345358	0.0314406	0.0256531		2.84e-08	0.485341		1.53324	1.17973	-0.118202
2.8425e-08	0.157115	0.164504	0.0346028	0.0300176	0.0274037		2.8425e-08	0.700984		1.62759	0.219186	1.24473
2.845e-08	0.150853	0.151156	0.0346028	0.027375	0.0278077		2.845e-08	-0.592081		1.67644	-1.60382	1.58668
2.8475e-08	0.155597	0.150615	0.0318586	0.0279171	0.0249125		2.8475e-08	-0.720269		-0.147595	-1.18138	-0.580093
2.85e-08	0.148576	0.161979	0.0329295	0.0288657	0.0255184		2.85e-08	1.14337		0.630874	-0.470809	-0.0854997
2.8525e-08	0.152561	0.15278	0.0302523	0.0288657	0.0237005		2.8525e-08	-0.56489		-1.15274	-0.43025	-1.43688
2.855e-08	0.162807	0.146647	0.0361422	0.0285947	0.0259898		2.855e-08	-1.45022		2.92552	-0.581736	0.341193
2.8575e-08	0.142694	0.161258	0.0325949	0.0287302	0.0233639		2.8575e-08	1.31199		0.543812	-0.445398	-1.62899
2.86e-08	0.147437	0.153321	0.0318586	0.0303564	0.0242392		2.86e-08	-1.77816		0.0857305	0.749059	-0.928231
2.8625e-08	0.156735	0.154403	0.0313901	0.0278493	0.0257204		2.8625e-08	-0.253321		-0.189534	-0.990527	0.236963
2.865e-08	0.152181	0.147549	0.0327287	0.0286624	0.0250471		2.865e-08	-0.520372		0.77716	-0.372606	-0.244516
2.8675e-08	0.154268	0.156207	0.0322602	0.0277138	0.0257878		2.8675e-08	0.938457		0.501901	-1.00752	0.35599
2.87e-08	0.156546	0.151698	0.0331972	0.0277138	0.0265284		2.87e-08	-0.779521		1.19454	-0.967839	0.957496
2.8725e-08	0.14516	0.148811	0.0299177	0.0295433	0.0248451		2.8725e-08	-0.183319		-1.02021	0.376622	-0.299541
2.875e-08	0.149904	0.152419	0.0297838	0.0285947	0.0261244		2.875e-08	-0.139954		-1.06748	-0.259663	0.715895
2.8775e-08	0.13795	0.157109	0.03052	0.0285947	0.0241718		2.8775e-08	0.769229		-0.513516	-0.219454	-0.750667
2.88e-08	0.144971	0.15278	0.0301185	0.0318471	0.0248451		2.88e-08	-0.43437		-0.745964	2.14712	-0.200148
2.8825e-08	0.145919	0.158913	0.0294492	0.0285947	0.0255184		2.8825e-08	-1.63983		-1.16454	-0.139216	0.351229
2.885e-08	0.149145	0.147188	0.0315909	0.0279171	0.0240372		2.885e-08	-1.45878		0.365404	-0.584767	-0.756571
2.8875e-08	0.154458	0.155846	0.0307878	0.0264941	0.0272691		2.8875e-08	0.598192		-0.146038	-1.56597	1.76815
2.89e-08	0.149145	0.141957	0.0343351	0.0277815	0.0235658		2.89e-08	-2.03473		2.36491	-0.602882	-1.05531
2.8925e-08	0.148007	0.148992	0.0320594	0.0279171	0.0249798		2.8925e-08	-0.288384		0.829918	-0.465933	0.0691351
2.895e-08	0.14554	0.153501	0.0303862	0.0265619	0.0268651		2.895e-08	-0.0713223		-0.288872	-1.40131	1.55987
2.8975e-08	0.148955	0.146647	0.0310555	0.0304242	0.0251818		2.8975e-08	0.285367		0.22313	1.41897	0.291807
2.9e-08	0.151422	0.155846	0.029583	0.0280526	0.0245085		2.9e-08	1.06095		-0.758779	-0.249283	-0.196341
2.9025e-08	0.156166	0.152058	0.0299177	0.0268329	0.0281444		2.9025e-08	0.616406		-0.480309	-1.08972	2.65474
2.905e-08	0.152371	0.149353	0.0312563	0.0274427	0.0252491		2.905e-08	-0.911345		0.500787	-0.610485	0.443841
2.9075e-08	0.140227	0.159995	0.0316579	0.0298143	0.0251818		2.9075e-08	0.738615		0.827719	1.1433	0.4248
2.91e-08	0.153509	0.152058	0.030587	0.0275105	0.0235658		2.91e-08	-2.22532		0.123132	-0.483211	-0.797815
2.9125e-08	0.142124	0.158191	0.0340004	0.029069	0.0245758		2.9125e-08	0.195941		2.56345	0.684901	0.0198276
2.915e-08	0.144401	0.142859	0.0292484	0.0257487	0.0234312		2.915e-08	0.589312		-0.726645	-1.68235	-0.838433
2.9175e-08	0.140606	0.159815	0.0298507	0.0263586	0.0239698		2.9175e-08	-1.92606		-0.258804	-1.20178	-0.386715
2.92e-08	0.138899	0.148451	0.0297838	0.0284591	0.0238352		2.92e-08	-2.37572		-0.261158	0.362717	-0.459304
2.9225e-08	0.146109	0.148811	0.0271066	0.0283236	0.0221519		2.9225e-08	-2.12404		-2.10293	0.304057	-1.74071
2.925e-08	0.149335	0.150255	0.0309216	0.0275105	0.0247105		2.925e-08	-0.993774		0.630825	-0.24807	0.289084
2.9275e-08	0.147627	0.139071	0.0309216	0.0280526	0.0225559		2.9275e-08	-0.0727816		0.676278	0.186046	-1.36253
2.93e-08	0.140227	0.145565	0.0299177	0.0262908	0.0243738		2.93e-08	-1.47252		0.0119778	-1.05943	0.0913546
2.9325e-08	0.142314	0.15278	0.0295161	0.0262231	0.0239025		2.9325e-08	1.84367		-0.227624	-1.07073	-0.245187
2.935e-08	0.140796	0.139071	0.0312563	0.0269007	0.0245085		2.935e-08	-0.649169		1.04932	-0.537478	0.26203
2.9375e-08	0.148576	0.140153	0.0301854	0.0281203	0.0234985		2.9375e-08	-0.536422		0.33547	0.393245	-0.497635
2.94e-08	0.147058	0.142679	0.0300515	0.0300176	0.0246431		2.94e-08	-2.08219		0.285204	1.82183	0.433063
2.9425e-08	0.154268	0.145565	0.0307878	0.0285947	0.0224212		2.9425e-08	0.0777631		0.853073	0.81979	-1.28023
2.945e-08	0.146678	0.145745	0.0320594	0.0280526	0.0234985		2.945e-08	0.0143317		1.80297	0.46196	-0.401638
2.9475e-08	0.148576	0.149894	0.0289137	0.0279171	0.0252491		2.9475e-08	1.01181		-0.390923	0.401904	1.00843
2.95e-08	0.140796	0.15296	0.0278428	0.0282559	0.0214786		2.95e-08	-0.148377		-1.11049	0.690262	-1.92903
2.9525e-08	0.138329	0.152239	0.02965	0.024258	0.0221519		2.9525e-08	-0.601903		0.222059	-2.21155	-1.36749
2.955e-08	0.140986	0.144482	0.0281775	0.0292045	0.0229599		2.955e-08	-0.205379		-0.785584	1.46786	-0.698813
2.9575e-08	0.138519	0.150074	0.0307878	0.0255455	0.0228925		2.9575e-08	0.936678		1.12416	-1.18933	-0.720461
2.96e-08	0.149335	0.143039	0.0298507	0.0250711	0.0230272		2.96e-08	-1.57633		0.498379	-1.50185	-0.582529
2.9625e-08	0.144591	0.150976	0.0284452	0.0254777	0.0234985		2.9625e-08	-1.17984		-0.464554	-1.16446	-0.178044
2.965e-08	0.144022	0.1434	0.0288468	0.0260198	0.0214786		2.965e-08	-0.782865		-0.133202	-0.726284	-1.74574
2.9675e-08	0.148007	0.144122	0.0307208	0.0239192	0.020132		2.9675e-08	-0.634454		1.2562	-2.24287	-2.7825
2.97e-08	0.135863	0.135644	0.0287129	0.0248679	0.0230945		2.97e-08	-2.0883		-0.142203	-1.50384	-0.402764
2.9725e-08	0.13776	0.150796	0.0253664	0.0266296	0.0248451		2.9725e-08	-0.12336		-2.50695	-0.160576	1.01878
2.975e-08	0.149525	0.146467	0.03052	0.0254099	0.0241045		2.975e-08	-1.1155		1.24665	-1.02749	0.463087
2.9775e-08	0.149714	0.15296	0.0299177	0.0264263	0.0218152		2.9775e-08	0.924428		0.857046	-0.235099	-1.32525
2.98e-08	0.144401	0.149713	0.0284452	0.025681	0.0221519		2.98e-08	-2.35432		-0.161671	-0.751323	-1.02657
2.9825e-08	0.136242	0.146106	0.0283783	0.0261553	0.0233639		2.9825e-08	-0.99145		-0.166943	-0.360856	-0.0301566
2.985e-08	0.147248	0.146286	0.0287129	0.0251389	0.0263938		2.985e-08	-1.09317		0.118166	-1.08034	2.41738
2.9875e-08	0.148196	0.137808	0.0273074	0.0240547	0.0212093		2.9875e-08	-2.5554		-0.856414	-1.85181	-1.68612
2.99e-08	0.14535	0.147729	0.0284452	0.0285269	0.0222192		2.99e-08	-1.61975		0.0106433	1.52266	-0.84921
2.9925e-08	0.134534	0.141777	0.0288468	0.0250711	0.0239698		2.9925e-08	-2.2602		0.345182	-1.01986	0.581137
2.995e-08	0.140986	0.144482	0.0263035	0.0260198	0.0216806		2.995e-08	0.506683		-1.45898	-0.273359	-1.21821
2.9975e-08	0.136052	0.14322	0.0269728	0.0267651	0.0218152		2.9975e-08	-0.312793		-0.93074	0.322335	-1.07976
3e-08	0.143073	0.147549	0.0281106	0.0258843	0.0241045		3e-08	0.698965		-0.0604589	-0.299499	0.785584
3.0025e-08	0.141176	0.140875	0.0282444	0.0268329	0.0210073		3.0025e-08	-2.02748		0.0798801	0.449559	-1.66648
3.005e-08	0.137191	0.145745	0.0285121	0.0281881	0.0221519		3.005e-08	-0.727673		0.318001	1.50515	-0.717518
3.0075e-08	0.132637	0.13853	0.026772	0.0245291	0.0224212		3.0075e-08	-0.506336		-0.909797	-1.20545	-0.470303
3.01e-08	0.147627	0.134021	0.0285121	0.025681	0.0237005		3.01e-08	-0.500971		0.403913	-0.302536	0.589424
3.0125e-08	0.140606	0.13853	0.0264373	0.0256132	0.0240372		3.0125e-08	0.550253		-1.07145	-0.316289	0.892239
3.015e-08	0.139088	0.141236	0.0280436	0.0264263	0.0228252		3.015e-08	-2.62004		0.146616	0.333742	-0.051901
3.0175e-08	0.140227	0.142498	0.025835	0.0266296	0.0240372		3.0175e-08	0.742738		-1.43038	0.524934	0.956478
3.02e-08	0.141365	0.142318	0.0252326	0.0258165	0.0237005		3.02e-08	-0.661078		-1.83158	-0.0510265	0.716985
3.0225e-08	0.141555	0.140153	0.0262365	0.0262908	0.0222192		3.0225e-08	-0.583868		-1.05334	0.344901	-0.447331
3.025e-08	0.13017	0.140514	0.0259688	0.0252744	0.0218826		3.025e-08	-1.23064		-1.20903	-0.386292	-0.688543
3.0275e-08	0.135673	0.139071	0.029583	0.0247323	0.0236332		3.0275e-08	-0.248072		1.49331	-0.759826	0.758227
3.03e-08	0.136622	0.137267	0.0263035	0.023987	0.0229599		3.03e-08	0.228339		-0.880459	-1.28829	0.244885
3.0325e-08	0.138329	0.134562	0.0270397	0.0261553	0.0232965		3.0325e-08	0.0885885		-0.296094	0.392761	0.548982
3.035e-08	0.140037	0.129691	0.0280436	0.0275105	0.0225559		3.035e-08	-1.21341		0.487122	1.45942	-0.0201664
3.0375e-08	0.13036	0.145745	0.0262365	0.0249356	0.0229599		3.0375e-08	-0.882209		-0.806671	-0.459437	0.338753
3.04e-08	0.126754	0.136546	0.0271066	0.0257487	0.0212766		3.04e-08	-1.53249		-0.121597	0.195854	-0.997409
3.0425e-08	0.143263	0.141236	0.027709	0.0261553	0.0237005		3.0425e-08	-0.910063		0.366475	0.542714	1.00356
3.045e-08	0.127513	0.140514	0.0241617	0.0273072	0.0220846		3.045e-08	-1.05161		-2.22239	1.4584	-0.279581
3.0475e-08	0.136242	0.139071	0.0266381	0.0234449	0.0239698		3.0475e-08	-0.683158		-0.344173	-1.45041	1.28661
3.05e-08	0.134155	0.146827	0.0274413	0.025681	0.0204686		3.05e-08	0.524747		0.294162	0.293036	-1.53534
3.0525e-08	0.132257	0.143039	0.0278428	0.0285269	0.0225559		3.0525e-08	-1.0763		0.634885	2.50592	0.197084
3.055e-08	0.131308	0.141236	0.0291814	0.0231739	0.0250471		3.055e-08	-2.4606		1.67405	-1.55135	2.26222
3.0575e-08	0.133206	0.134381	0.0273074	0.0234449	0.0222192		3.0575e-08	-1.94602		0.319975	-1.30854	-0.0161091
3.06e-08	0.132826	0.137267	0.0271066	0.0258165	0.020132		3.06e-08	-0.479509		0.211801	0.545152	-1.69259
3.0625e-08	0.135293	0.141416	0.0264373	0.0262231	0.0215459		3.0625e-08	-0.40217		-0.246712	0.894258	-0.505875
3.065e-08	0.122959	0.135824	0.0275082	0.023987	0.0214786		3.065e-08	-0.984339		0.595211	-0.786007	-0.53079
3.0675e-08	0.129411	0.134201	0.0289137	0.0245968	0.0230945		3.0675e-08	-0.614102		1.68936	-0.2813	0.824474
3.07e-08	0.133965	0.126986	0.0250987	0.0246646	0.0224212		3.07e-08	-1.96807		-1.12672	-0.192879	0.303265
3.0725e-08	0.132447	0.131495	0.0273074	0.0253422	0.0233639		3.0725e-08	-0.53318		0.570296	0.365443	1.10842
3.075e-08	0.135293	0.1434	0.0251657	0.0251389	0.0239025		3.075e-08	1.52859		-0.996395	0.245492	1.58276
3.0775e-08	0.127893	0.142318	0.0273074	0.0221575	0.0206033		3.0775e-08	1.90162		0.653691	-2.01906	-1.09983
3.08e-08	0.132637	0.12879	0.028646	0.0262231	0.0219499		3.08e-08	0.324465		1.70263	1.15621	0.0386022
3.0825e-08	0.132067	0.137087	0.0271066	0.020599	0.0208053		3.0825e-08	0.14457		0.585584	-3.15555	-0.874285
3.085e-08	0.136432	0.13366	0.0259019	0.0224285	0.0208726		3.085e-08	-1.43639		-0.281517	-1.7063	-0.7891
3.0875e-08	0.13776	0.134562	0.0250987	0.0271039	0.0222192		3.0875e-08	0.44775		-0.847353	1.95052	0.352285
3.09e-08	0.144022	0.124461	0.0266381	0.023987	0.0216806		3.09e-08	0.267292		0.355683	-0.428721	-0.0621219
3.0925e-08	0.133396	0.130954	0.0246302	0.0252067	0.0225559		3.0925e-08	0.382031		-1.12206	0.5537	0.691986
3.095e-08	0.138709	0.129331	0.0268389	0.0249356	0.0208053		3.095e-08	-1.61055		0.589847	0.379704	-0.725958
3.0975e-08	0.134914	0.145925	0.0240948	0.023987	0.0211419		3.0975e-08	-1.34917		-1.44888	-0.321657	-0.417396
3.1e-08	0.129221	0.13366	0.0232916	0.0245291	0.0204013		3.1e-08	-0.346901		-2.01921	0.135993	-1.00149
3.1025e-08	0.131688	0.12879	0.0250987	0.0254099	0.0217479		3.1025e-08	-1.56648		-0.608281	0.858378	0.145213
3.105e-08	0.139088	0.126805	0.0242286	0.0241903	0.0206033		3.105e-08	-0.155014		-1.23009	-0.0562472	-0.775046
3.1075e-08	0.132447	0.133119	0.0288468	0.0228351	0.0210073		3.1075e-08	0.219419		2.32372	-1.0785	-0.409833
3.11e-08	0.138329	0.12428	0.026772	0.0232416	0.0212093		3.11e-08	0.000124053		0.785548	-0.726165	-0.212093
3.1125e-08	0.132067	0.136726	0.0274413	0.0214799	0.0212766		3.1125e-08	0.00341451		1.33694	-2.06912	-0.12618
3.115e-08	0.141935	0.1434	0.0257011	0.0261553	0.0213439		3.115e-08	0.378566		0.0499299	1.62477	-0.040161
3.1175e-08	0.13814	0.128248	0.0263035	0.0224963	0.0215459		3.1175e-08	-1.14417		0.550427	-1.20531	0.158271
3.12e-08	0.132826	0.130954	0.0252995	0.0241903	0.0230945		3.12e-08	-1.06749		-0.176929	0.157832	1.48094
3.1225e-08	0.130549	0.132578	0.026705	0.0222252	0.020536		3.1225e-08	-0.282446		0.939267	-1.34917	-0.625101
3.125e-08	0.126565	0.126805	0.0261027	0.0249356	0.0247778		3.125e-08	0.764881		0.518456	0.814979	2.9507
3.1275e-08	0.12998	0.135644	0.0259019	0.0226996	0.0216806		3.1275e-08	-0.687682		0.404794	-0.907648	0.391478
3.13e-08	0.12239	0.132758	0.0252326	0.0227673	0.0202666		3.13e-08	-0.0127791		-0.069125	-0.819807	-0.762474
3.1325e-08	0.137001	0.128609	0.0240948	0.0237837	0.0218826		3.1325e-08	-0.832542		-0.904388	0.0156713	0.621076
3.135e-08	0.124667	0.13871	0.0261027	0.0229706	0.0217479		3.135e-08	-0.007165		0.679791	-0.590477	0.538376
3.1375e-08	0.125616	0.127166	0.0252995	0.0269007	0.0219499		3.1375e-08	-0.116812		0.101242	2.54709	0.738131
3.14e-08	0.133585	0.130774	0.0247641	0.0266974	0.0230945		3.14e-08	0.447838		-0.272066	2.42401	1.73025
3.1425e-08	0.125995	0.133299	0.0232916	0.0250034	0.0212766		3.1425e-08	-0.561893		-1.36962	1.12146	0.232565
3.145e-08	0.132826	0.135283	0.0250318	0.0231739	0.0201993		3.145e-08	-3.26213		0.0133992	-0.290893	-0.644288
3.1475e-08	0.123908	0.134201	0.0246302	0.0227673	0.01993		3.1475e-08	-0.783239		-0.257774	-0.578253	-0.842033
3.15e-08	0.125806	0.125723	0.0249649	0.025952	0.0193913		3.15e-08	-1.79634		0.0405443	1.98258	-1.26724
3.1525e-08	0.127513	0.129331	0.0275751	0.0218864	0.0223539		3.1525e-08	-0.0274025		2.10343	-1.20869	1.2611
3.155e-08	0.125236	0.135103	0.02289	0.0250034	0.0209399		3.155e-08	-0.627434		-1.49087	1.30229	0.0975735
3.1575e-08	0.128652	0.118147	0.0234924	0.0237837	0.0207379		3.1575e-08	-1.86885		-0.985339	0.36808	-0.0436079
3.16e-08	0.135863	0.131495	0.0240948	0.0238515	0.0181794		3.16e-08	-2.92369		-0.47888	0.457151	-2.17859
3.1625e-08	0.120303	0.125362	0.023894	0.0212766	0.0196607		3.1625e-08	-0.697742		-0.59663	-1.55984	-0.896905
3.165e-08	0.127893	0.129691	0.0240278	0.022564	0.0214786		3.165e-08	0.814059		-0.453934	-0.49954	0.672158
3.1675e-08	0.126944	0.121033	0.0234924	0.0224285	0.0211419		3.1675e-08	-0.279188		-0.833025	-0.573507	0.416604
3.17e-08	0.128462	0.126805	0.0236932	0.0213444	0.0206706		3.17e-08	0.403125		-0.63813	-1.40585	0.0462922
3.1725e-08	0.12258	0.136365	0.0242286	0.0228351	0.0225559		3.1725e-08	1.08641		-0.18137	-0.179935	1.67719
3.175e-08	0.126754	0.125904	0.0243625	0.0239192	0.0183814		3.175e-08	0.142216		-0.0379621	0.722642	-1.84124
3.1775e-08	0.123339	0.132938	0.0248979	0.0224963	0.0185834		3.1775e-08	0.295661		0.420095	-0.382629	-1.64164
3.18e-08	0.135483	0.131134	0.0242286	0.0220897	0.0222192		3.18e-08	-1.1816		-0.0654916	-0.67469	1.48257
3.1825e-08	0.119354	0.126445	0.0226223	0.0250034	0.020132		3.1825e-08	-0.155994		-1.28749	1.69872	-0.266067
3.185e-08	0.126944	0.122116	0.0226892	0.0233094	0.0211419		3.185e-08	1.51683		-1.1977	0.373102	0.624372
3.1875e-08	0.131119	0.125904	0.02289	0.0217509	0.0208053		3.1875e-08	0.683197		-1.00254	-0.846034	0.366567
3.19e-08	0.126185	0.115081	0.0259019	0.0220897	0.0198626		3.19e-08	0.190593		1.40556	-0.539727	-0.409497
3.1925e-08	0.123149	0.122837	0.0240948	0.0210733	0.0211419		3.1925e-08	-0.569329		0.0215953	-1.32517	0.713266
3.195e-08	0.135293	0.135103	0.0263035	0.0229706	0.0216133		3.195e-08	-1.40666		1.80206	0.238481	1.14633
3.1975e-08	0.134534	0.130954	0.0222877	0.0226996	0.0208726		3.1975e-08	-0.186405		-1.32822	0.0540727	0.541898
3.2e-08	0.126944	0.116524	0.0213506	0.0231739	0.0200646		3.2e-08	-0.83402		-2.03177	0.471678	-0.121339
3.2025e-08	0.121441	0.130954	0.0245633	0.02087	0.020334		3.2025e-08	-1.55901		0.545948	-1.35762	0.138612
3.205e-08	0.127324	0.11959	0.0237601	0.0197859	0.0215459		3.205e-08	-1.97941		-0.0513913	-2.20279	1.20842
3.2075e-08	0.123908	0.12428	0.0230908	0.0218187	0.0190547		3.2075e-08	-1.86509		-0.54395	-0.523254	-0.902911
3.21e-08	0.129221	0.127707	0.0227562	0.0228351	0.0227579		3.21e-08	0.583874		-0.772056	0.334744	2.31065
3.2125e-08	0.134724	0.120853	0.0242956	0.022293	0.0206706		3.2125e-08	0.0107476		0.487856	-0.0712657	0.544408
3.215e-08	0.13036	0.134742	0.0216184	0.0213444	0.0218826		3.215e-08	0.50987		-1.60238	-0.80853	1.61791
3.2175e-08	0.131498	0.126625	0.0233585	0.0222252	0.0198626		3.2175e-08	0.165795		-0.181058	-0.0588006	-0.0938687
3.22e-08	0.120682	0.118869	0.0275751	0.0218864	0.0199973		3.22e-08	1.47174		3.21606	-0.300912	0.0510425
3.2225e-08	0.118785	0.125002	0.0255672	0.0207345	0.0199973		3.2225e-08	-0.024706		1.65584	-1.20628	0.0798325
3.225e-08	0.122959	0.126805	0.022957	0.0200569	0.0181794		3.225e-08	-0.639229		-0.38852	-1.72646	-1.46303
3.2275e-08	0.115749	0.127527	0.0245633	0.0194471	0.019728		3.2275e-08	-2.48583		0.932444	-2.19238	-0.0956743
3.23e-08	0.12258	0.13366	0.0224215	0.020599	0.0178427		3.23e-08	-0.215577		-0.742264	-1.21931	-1.69973
3.2325e-08	0.125047	0.123739	0.0236263	0.0215476	0.0198626		3.2325e-08	-0.215249		0.259188	-0.410825	0.0780489
3.235e-08	0.12277	0.124461	0.0218192	0.0207345	0.019324		3.235e-08	-2.22007		-1.15155	-1.04357	-0.360599
3.2375e-08	0.117077	0.118328	0.0224885	0.0226996	0.0183814		3.2375e-08	-1.56539		-0.578277	0.599507	-1.15073
3.24e-08	0.12979	0.132397	0.0233585	0.0235804	0.0206033		3.24e-08	-0.176088		0.157358	1.35615	0.807304
3.2425e-08	0.123529	0.123739	0.0220199	0.0219542	0.0185834		3.2425e-08	-1.02627		-0.881266	0.0554455	-0.920028
3.245e-08	0.112903	0.126084	0.024831	0.0198536	0.0170347		3.245e-08	-0.292105		1.41747	-1.63758	-2.24008
3.2475e-08	0.113851	0.125723	0.0230239	0.0207345	0.0197953		3.2475e-08	-0.253572		0.000474922	-0.881035	0.191021
3.25e-08	0.11518	0.120492	0.0234255	0.0214799	0.0209399		3.25e-08	-0.912219		0.361579	-0.234762	1.21742
3.2525e-08	0.118975	0.120673	0.0226892	0.0203957	0.0184487		3.2525e-08	0.831374		-0.195151	-1.0953	-0.926761
3.255e-08	0.120303	0.127707	0.0226223	0.0214121	0.0204686		3.255e-08	0.715569		-0.212335	-0.224637	0.864579
3.2575e-08	0.118595	0.123919	0.0230908	0.0203957	0.0175734		3.2575e-08	-1.96261		0.203397	-1.03101	-1.63667
3.26e-08	0.125806	0.123919	0.0232247	0.0230384	0.0188527		3.26e-08	-1.80884		0.348926	1.18523	-0.49088
3.2625e-08	0.113851	0.125543	0.0248979	0.0216154	0.0180447		3.2625e-08	-0.0220157		1.74224	0.0421915	-1.17037
3.265e-08	0.119354	0.123919	0.0236263	0.0210056	0.0191893		3.265e-08	0.833612		0.749244	-0.429724	-0.140347
3.2675e-08	0.118216	0.123559	0.0234924	0.0230384	0.0210746		3.2675e-08	-0.0617342		0.678173	1.28766	1.54079
3.27e-08	0.123718	0.123198	0.0243625	0.0212088	0.0197953		3.27e-08	0.132566		1.42299	-0.19586	0.44758
3.2725e-08	0.119923	0.11454	0.0237601	0.0222252	0.0175061		3.2725e-08	-0.452807		0.971107	0.680877	-1.53453
3.275e-08	0.1148	0.124641	0.0234255	0.020328	0.018314		3.275e-08	-0.102503		0.736273	-0.862412	-0.797465
3.2775e-08	0.116318	0.123018	0.0232916	0.0216832	0.0174387		3.2775e-08	0.248295		0.664549	0.296985	-1.54011
3.28e-08	0.117457	0.113277	0.0220869	0.0226318	0.0177081		3.28e-08	-0.963747		-0.281425	1.1199	-1.27625
3.2825e-08	0.111574	0.125002	0.0231578	0.0224285	0.0175734		3.2825e-08	0.403791		0.629644	0.984216	-1.36801
3.285e-08	0.113662	0.114179	0.0226223	0.0206668	0.019324		3.285e-08	0.873053		0.228857	-0.451848	0.202726
3.2875e-08	0.125047	0.113277	0.0218192	0.0212766	0.0180447		3.2875e-08	0.637849		-0.391951	0.0895378	-0.898401
3.29e-08	0.121062	0.118688	0.0218861	0.022022	0.0178427		3.29e-08	-0.381815		-0.301112	0.745133	-1.04969
3.2925e-08	0.12239	0.111113	0.0242286	0.0212088	0.0191893		3.2925e-08	-0.500795		1.65634	0.0982503	0.167927
3.295e-08	0.117836	0.121214	0.0227562	0.0226318	0.020334		3.295e-08	0.714809		0.485428	1.32232	1.2088
3.2975e-08	0.114231	0.125362	0.0213506	0.0197181	0.0188527		3.2975e-08	-0.22872		-0.632886	-1.08567	-0.07417
3.3e-08	0.111954	0.118688	0.0222207	0.02087	0.0173041		3.3e-08	0.00585351		0.118539	-0.0879226	-1.41901
3.3025e-08	0.116318	0.116524	0.0217522	0.0208023	0.0180447		3.3025e-08	-1.8447		-0.230975	-0.112457	-0.735402
3.305e-08	0.122011	0.105521	0.0214176	0.0215476	0.0185834		3.305e-08	-0.665986		-0.470972	0.546167	-0.230067
3.3075e-08	0.1222	0.11454	0.0212168	0.0219542	0.0174387		3.3075e-08	-1.92879		-0.60111	0.920934	-1.21964
3.31e-08	0.113282	0.108948	0.0243625	0.0211411	0.019728		3.31e-08	-1.34002		2.03242	0.26946	0.842792
3.3125e-08	0.108728	0.120853	0.0216184	0.0219542	0.0171021		3.3125e-08	-1.14511		-0.198394	0.987122	-1.46601
3.315e-08	0.113662	0.11454	0.0198782	0.0206668	0.0194587		3.315e-08	0.86682		-1.60284	-0.0656628	0.659533
3.3175e-08	0.102276	0.116524	0.0212837	0.0195148	0.0196607		3.3175e-08	-0.715142		-0.404203	-1.00601	0.867758
3.32e-08	0.124288	0.120312	0.0209491	0.0227673	0.0191893		3.32e-08	-0.282229		-0.646238	1.77361	0.475547
3.3225e-08	0.118216	0.110932	0.0220869	0.0193116	0.01791		3.3225e-08	-0.482077		0.3334	-1.11543	-0.638852
3.325e-08	0.118595	0.115622	0.0198782	0.0195148	0.0182467		3.325e-08	-1.07841		-1.46566	-0.912254	-0.310965
3.3275e-08	0.11461	0.117245	0.0215514	0.0204635	0.0199973		3.3275e-08	-1.4378		-0.0397698	-0.077233	1.28211
3.33e-08	0.12258	0.121394	0.0214176	0.0180241	0.019324		3.33e-08	-0.805913		-0.115654	-2.11421	0.707863
3.3325e-08	0.124667	0.117245	0.0217522	0.0193793	0.0187853		3.3325e-08	-0.331932		0.198633	-0.933823	0.253248
3.335e-08	0.110246	0.11941	0.0210829	0.0215476	0.0193913		3.335e-08	-0.493036		-0.324024	0.939539	0.82418
3.3375e-08	0.117836	0.119049	0.0212837	0.0217509	0.0199973		3.3375e-08	-0.972571		-0.121256	1.1451	1.39601
3.34e-08	0.106641	0.121394	0.0232247	0.0197859	0.0190547		3.34e-08	-0.0999411		1.53636	-0.494748	0.577858
3.3425e-08	0.1222	0.111293	0.0214176	0.0216154	0.0189873		3.3425e-08	-0.819006		0.061341	1.09537	0.545133
3.345e-08	0.112144	0.110932	0.0220869	0.0178886	0.0173714		3.345e-08	-0.343629		0.657318	-2.05003	-0.880868
3.3475e-08	0.119164	0.10967	0.0222877	0.0195148	0.0180447		3.3475e-08	-0.984308		0.861647	-0.632023	-0.248062
3.35e-08	0.110625	0.115802	0.0225554	0.020328	0.0177081		3.35e-08	-0.388696		1.12245	0.0938127	-0.524374
3.3525e-08	0.113662	0.115802	0.0212837	0.0195148	0.020536		3.3525e-08	0.727034		0.0905873	-0.569791	2.05281
3.355e-08	0.117077	0.115983	0.0210829	0.0193793	0.018516		3.355e-08	0.765149		-0.0430315	-0.654735	0.258443
3.3575e-08	0.111195	0.113277	0.0222877	0.0194471	0.0184487		3.3575e-08	0.603268		1.00592	-0.565773	0.224946
3.36e-08	0.111384	0.121755	0.0210829	0.0184307	0.0188527		3.36e-08	-0.799929		0.0269454	-1.40638	0.617456
3.3625e-08	0.114041	0.11959	0.0223546	0.0204635	0.0206033		3.3625e-08	-2.44569		1.13432	0.368472	2.22906
3.365e-08	0.103035	0.112014	0.0206144	0.0195826	0.0164288		3.365e-08	-0.0847309		-0.298567	-0.356502	-1.52248
3.3675e-08	0.108538	0.113097	0.0206813	0.0212088	0.0176407		3.3675e-08	-2.09369		-0.207386	1.0729	-0.398247
3.37e-08	0.115369	0.11003	0.0226892	0.0194471	0.0188527		3.37e-08	1.23459		1.5256	-0.410943	0.727815
3.3725e-08	0.113282	0.110211	0.0184057	0.0187695	0.0181794		3.3725e-08	-0.213951		-2.06459	-0.96364	0.144179
3.375e-08	0.111195	0.113638	0.0182049	0.0193116	0.0169674		3.375e-08	-0.699592		-2.20198	-0.465805	-0.929886
3.3775e-08	0.113472	0.113818	0.0220199	0.0205312	0.0169674		3.3775e-08	-0.984776		1.06688	0.617612	-0.903716
3.38e-08	0.115369	0.113818	0.0234255	0.017482	0.0194587		3.38e-08	0.380789		2.29606	-1.98449	1.38967
3.3825e-08	0.111954	0.108948	0.0210829	0.0181596	0.018112		3.3825e-08	-1.2341		0.341786	-1.36933	0.191106
3.385e-08	0.11461	0.112916	0.0206144	0.0193116	0.0184487		3.385e-08	-0.673448		-0.0219734	-0.342675	0.524957
3.3875e-08	0.108538	0.106062	0.0194766	0.0196504	0.0184487		3.3875e-08	-0.39458		-0.956521	-0.0184833	0.552174
3.39e-08	0.112903	0.11472	0.0180041	0.0205312	0.0184487		3.39e-08	0.692507		-2.17824	0.776206	0.579402
3.3925e-08	0.104553	0.105882	0.0194766	0.0183629	0.0182467		3.3925e-08	-0.644333		-0.889449	-1.07357	0.42206
3.395e-08	0.118026	0.108768	0.0204136	0.0195826	0.0160921		3.395e-08	-2.63052		-0.0555181	0.0157926	-1.52139
3.3975e-08	0.109487	0.106242	0.0202128	0.0182274	0.018718		3.3975e-08	-0.328305		-0.192838	-1.13129	0.907703
3.4e-08	0.0998096	0.110932	0.0198782	0.0214799	0.0164961		3.4e-08	-1.2234		-0.445085	1.72863	-1.10033
3.4025e-08	0.117836	0.104619	0.020012	0.0170077	0.0158901		3.4025e-08	-1.02514		-0.296576	-2.1337	-1.63016
3.405e-08	0.107779	0.114179	0.0207483	0.0189728	0.0177754		3.405e-08	-0.867175		0.36865	-0.391926	0.125038
3.4075e-08	0.110625	0.11003	0.0192758	0.0190405	0.0185834		3.4075e-08	-1.96783		-0.86078	-0.302411	0.893714
3.41e-08	0.1074	0.108948	0.0198782	0.0205312	0.0161594		3.41e-08	0.668438		-0.310008	1.02983	-1.30686
3.4125e-08	0.107779	0.113277	0.020012	0.0184984	0.0179774		3.4125e-08	-0.554856		-0.161162	-0.715361	0.390835
3.415e-08	0.119354	0.109309	0.0190081	0.0206668	0.0160248		3.415e-08	-1.33239		-0.991599	1.21163	-1.37994
3.4175e-08	0.102656	0.100651	0.0197443	0.0199214	0.0187853		3.4175e-08	-2.27408		-0.324145	0.590711	1.18895
3.42e-08	0.113851	0.108407	0.0216853	0.019176	0.0193913		3.42e-08	-1.54612		1.38375	-0.0313758	1.77521
3.4225e-08	0.10702	0.112556	0.0182719	0.0180919	0.01791		3.4225e-08	-0.694747		-1.52816	-0.951859	0.436087
3.425e-08	0.110625	0.107866	0.0206144	0.0210056	0.0166981		3.425e-08	-0.12788		0.528817	1.6362	-0.656534
3.4275e-08	0.105692	0.10985	0.0203467	0.0188372	0.0162268		3.4275e-08	-1.48019		0.331542	-0.237415	-1.06637
3.43e-08	0.109297	0.106603	0.0194766	0.0185662	0.019122		3.43e-08	-0.299892		-0.387863	-0.445607	1.63767
3.4325e-08	0.114421	0.103717	0.0196105	0.0182274	0.0171021		3.4325e-08	-1.28622		-0.238553	-0.713921	-0.204984
3.435e-08	0.111384	0.107685	0.0193427	0.0190405	0.018718		3.435e-08	-0.145046		-0.437466	0.0323212	1.31858
3.4375e-08	0.108728	0.117606	0.0198113	0.0166689	0.0182467		3.4375e-08	-1.91137		0.00257756	-2.02917	0.908793
3.44e-08	0.108918	0.106242	0.0203467	0.017482	0.0162941		3.44e-08	-1.09715		0.501614	-1.28286	-0.876629
3.4425e-08	0.107779	0.115081	0.0214176	0.0187695	0.0166308		3.4425e-08	-0.322825		1.46752	-0.116112	-0.538375
3.445e-08	0.108728	0.111473	0.018138	0.0178886	0.0199973		3.445e-08	-1.4775		-1.35415	-0.865017	2.61738
3.4475e-08	0.105123	0.111834	0.0203467	0.0164656	0.0185834		3.4475e-08	0.283908		0.603764	-2.0952	1.33007
3.45e-08	0.111954	0.108948	0.0198782	0.0199214	0.0182467		3.45e-08	0.114929		0.228911	0.99505	1.04383
3.4525e-08	0.112713	0.109489	0.0214845	0.0182952	0.019324		3.4525e-08	0.439565		1.66577	-0.416118	2.07487
3.455e-08	0.110246	0.110571	0.0216184	0.018634	0.01892		3.455e-08	-0.59458		1.81773	-0.0856837	1.72582
3.4575e-08	0.103605	0.100831	0.0189412	0.0160591	0.0163614		3.4575e-08	-1.383		-0.490624	-2.34338	-0.635262
3.46e-08	0.0996199	0.103897	0.0208821	0.0208023	0.0175734		3.46e-08	-0.60512		1.24263	1.90235	0.522561
3.4625e-08	0.100569	0.110571	0.0198113	0.018634	0.0157555		3.4625e-08	-2.79845		0.337811	0.00410829	-1.15092
3.465e-08	0.103035	0.115442	0.0184057	0.0175498	0.0155535		3.465e-08	-1.56618		-0.862589	-0.931781	-1.31492
3.4675e-08	0.104933	0.109128	0.0190081	0.0188372	0.0164961		3.4675e-08	1.44563		-0.301022	0.245262	-0.407153
3.47e-08	0.110625	0.102274	0.0196774	0.0182274	0.01791		3.47e-08	-0.00657108		0.320463	-0.268858	0.943868
3.4725e-08	0.108348	0.099388	0.0208821	0.0161268	0.0158228		3.4725e-08	0.940527		1.4145	-2.11557	-0.987539
3.475e-08	0.0948761	0.112375	0.0214845	0.0170077	0.018516		3.475e-08	0.0657937		1.97973	-1.30006	1.56626
3.4775e-08	0.104743	0.108587	0.020012	0.0181596	0.0173041		3.4775e-08	-0.520007		0.715691	-0.240608	0.454569
3.48e-08	0.105882	0.101553	0.0190081	0.017482	0.0175734		3.48e-08	-1.06522		-0.137238	-0.818027	0.734045
3.4825e-08	0.105123	0.112916	0.0190081	0.018634	0.0166308		3.4825e-08	-3.52166		-0.104594	0.243594	-0.12679
3.485e-08	0.104174	0.104439	0.0185396	0.0173465	0.0170347		3.485e-08	-1.1192		-0.486456	-0.881796	0.279397
3.4875e-08	0.101328	0.107325	0.0198113	0.0184984	0.0168327		3.4875e-08	-0.62645		0.671895	0.181558	0.114925
3.49e-08	0.101328	0.102094	0.0193427	0.017482	0.01791		3.49e-08	-0.174669		0.289932	-0.702364	1.15718
3.4925e-08	0.102846	0.104258	0.0161301	0.0159913	0.0180447		3.4925e-08	0.527639		-2.52759	-2.01467	1.311
3.495e-08	0.104174	0.101733	0.0197443	0.0180919	0.0164288		3.495e-08	0.230475		0.712506	-0.0952806	-0.189383
3.4975e-08	0.100758	0.102996	0.0175356	0.0176176	0.0166308		3.4975e-08	-1.61071		-1.21768	-0.493356	0.0272042
3.5e-08	0.110056	0.100651	0.0206813	0.0184984	0.0160921		3.5e-08	-0.782808		1.61293	0.330399	-0.456999
3.5025e-08	0.105692	0.101733	0.0192089	0.0162624	0.0178427		3.5025e-08	-0.622164		0.335445	-1.65901	1.22672
3.505e-08	0.117646	0.113999	0.0182719	0.0180241	0.0169001		3.505e-08	-0.963039		-0.467237	-0.0388652	0.35953
3.5075e-08	0.0971531	0.106423	0.019142	0.0187017	0.0160921		3.5075e-08	-1.80657		0.341159	0.60337	-0.381355
3.51e-08	0.100569	0.0970431	0.0170002	0.0159236	0.0150148		3.51e-08	-2.06519		-1.53944	-1.88221	-1.37928
3.5125e-08	0.107779	0.102635	0.0194766	0.01694	0.0153515		3.5125e-08	0.776694		0.705645	-0.933565	-1.03495
3.515e-08	0.104364	0.102274	0.0199451	0.018634	0.0162268		3.515e-08	-3.50643		1.1579	0.631354	-0.177705
3.5175e-08	0.100379	0.104439	0.0185396	0.0176853	0.0166981		3.5175e-08	-1.16514		-0.0679324	-0.200085	0.29631
3.52e-08	0.103035	0.102274	0.019142	0.0184307	0.0156881		3.52e-08	0.717614		0.504408	0.506237	-0.640285
3.5225e-08	0.0952556	0.10047	0.0184727	0.0188372	0.0170347		3.5225e-08	-1.05354		-0.0636804	0.905647	0.668728
3.525e-08	0.102276	0.107325	0.0196774	0.0192438	0.0166308		3.525e-08	-2.23851		1.05085	1.3057	0.309134
3.5275e-08	0.0988609	0.111834	0.0188073	0.0187695	0.0156881		3.5275e-08	1.96271		0.301415	0.903799	-0.56559
3.53e-08	0.108918	0.112195	0.0180711	0.0171432	0.0159574		3.53e-08	-1.62297		-0.32907	-0.549404	-0.28329
3.5325e-08	0.106641	0.108407	0.018138	0.0179564	0.0161594		3.5325e-08	-1.12486		-0.23715	0.22125	-0.0650076
3.535e-08	0.0982916	0.0975843	0.0189412	0.01694	0.0160248		3.535e-08	1.399		0.518912	-0.678184	-0.168755
3.5375e-08	0.103605	0.100831	0.0176026	0.0171432	0.0152168		3.5375e-08	0.337849		-0.657256	-0.464015	-0.917903
3.54e-08	0.0982916	0.10047	0.019142	0.0178886	0.0141395		3.54e-08	-1.52775		0.765072	0.246615	-1.92659
3.5425e-08	0.103035	0.0990273	0.0179372	0.0171432	0.0176407		3.5425e-08	-0.140408		-0.292128	-0.407057	1.45751
3.545e-08	0.103415	0.103176	0.0178034	0.0148394	0.0171694		3.545e-08	-0.105128		-0.3818	-2.49083	1.03116
3.5475e-08	0.0958248	0.105521	0.0206144	0.0176176	0.0172367		3.5475e-08	-2.99177		2.19729	0.0852292	1.12192
3.55e-08	0.102846	0.0948786	0.0173349	0.0172788	0.0163614		3.55e-08	-1.60254		-0.744016	-0.197074	0.305816
3.5525e-08	0.0984814	0.102274	0.020012	0.0177531	0.0154861		3.5525e-08	0.12801		1.71795	0.267545	-0.511682
3.555e-08	0.0977223	0.0995684	0.0193427	0.0159913	0.0175734		3.555e-08	-0.091197		1.14284	-1.3246	1.52449
3.5575e-08	0.0943068	0.102094	0.0174018	0.0167367	0.0150148		3.5575e-08	-0.140876		-0.59043	-0.610709	-0.916993
3.56e-08	0.108728	0.103897	0.017201	0.0171432	0.0163614		3.56e-08	-0.105676		-0.742383	-0.207909	0.407117
3.5625e-08	0.101517	0.10029	0.0195435	0.0157203	0.0157555		3.5625e-08	-1.26155		1.42366	-1.49236	-0.152995
3.565e-08	0.103035	0.104799	0.0184727	0.01694	0.0175734		3.565e-08	-0.546179		0.479361	-0.338863	1.62951
3.5675e-08	0.105312	0.105341	0.0178034	0.0165334	0.0152168		3.5675e-08	-1.06525		-0.100032	-0.686389	-0.624516
3.57e-08	0.0984814	0.104258	0.0210829	0.017482	0.0152168		3.57e-08	-1.1162		2.92933	0.219096	-0.600072
3.5725e-08	0.0996199	0.0999292	0.0170671	0.01694	0.0139375		3.5725e-08	0.624663		-0.711105	-0.254111	-1.81552
3.575e-08	0.10721	0.100651	0.0176695	0.0159913	0.0157555		3.575e-08	-0.791481		-0.128748	-1.105	-0.0286971
3.5775e-08	0.091081	0.102274	0.0198782	0.01694	0.0151495		3.5775e-08	-0.0733288		1.92729	-0.197661	-0.592132
3.58e-08	0.101517	0.0946982	0.0196105	0.0157203	0.0164288		3.58e-08	0.51759		1.71463	-1.30183	0.675124
3.5825e-08	0.0931683	0.0984862	0.0194766	0.0181596	0.0154188		3.5825e-08	0.339082		1.62442	0.991991	-0.281602
3.585e-08	0.0999994	0.0977646	0.0173349	0.0187017	0.0150148		3.585e-08	-0.91038		-0.312165	1.52528	-0.650222
3.5875e-08	0.0988609	0.0912711	0.0202798	0.0159236	0.0160248		3.5875e-08	-0.0189261		2.42879	-1.03123	0.357618
3.59e-08	0.0996199	0.101913	0.0184727	0.0167367	0.0140048		3.59e-08	-1.69958		0.797444	-0.246357	-1.58625
3.5925e-08	0.0931683	0.101733	0.0158624	0.0161946	0.0166308		3.5925e-08	-0.592926		-1.57763	-0.723872	0.998791
3.595e-08	0.100189	0.0966824	0.0179372	0.0171432	0.0147455		3.595e-08	-1.54645		0.366815	0.189102	-0.816291
3.5975e-08	0.0958248	0.106784	0.0196105	0.0151104	0.0158901		3.5975e-08	-0.223208		1.94393	-1.68157	0.326154
3.6e-08	0.103225	0.10011	0.0168663	0.0176176	0.0146782		3.6e-08	-3.24283		-0.560831	0.689281	-0.834084
3.6025e-08	0.0971531	0.0970431	0.0164648	0.0184307	0.0161594		3.6025e-08	-1.78979		-0.902223	1.47893	0.639569
3.605e-08	0.101897	0.0983058	0.0180041	0.0153137	0.0136682		3.605e-08	-1.06699		0.553902	-1.41135	-1.77546
3.6075e-08	0.0977223	0.0930748	0.0171341	0.0171432	0.0138702		3.6075e-08	-4.43905		-0.221754	0.330569	-1.55436
3.61e-08	0.0944966	0.102274	0.0182719	0.0168722	0.0148802		3.61e-08	-0.610668		0.864863	0.104456	-0.540272
3.6125e-08	0.0975326	0.110391	0.0184727	0.0171432	0.0155535		3.6125e-08	-1.87178		1.08288	0.387003	0.144871
3.615e-08	0.0899425	0.0910907	0.018138	0.0188372	0.0146108		3.615e-08	1.18631		0.803295	2.00762	-0.756818
3.6175e-08	0.101897	0.100651	0.0173349	0.0176176	0.0136682		3.6175e-08	-0.983626		0.0870053	0.889747	-1.65999
3.62e-08	0.0937375	0.0952394	0.0164648	0.0151104	0.0160921		3.62e-08	0.781281		-0.693055	-1.44251	0.748858
3.6225e-08	0.0931683	0.0981254	0.0173349	0.0176853	0.0151495		3.6225e-08	-0.396215		0.148366	1.01094	-0.154618
3.625e-08	0.105882	0.097945	0.0159293	0.0164656	0.0164961		3.625e-08	-0.968733		-1.13313	-0.110944	1.19723
3.6275e-08	0.100379	0.0970431	0.0169333	0.0153815	0.0151495		3.6275e-08	-1.02165		-0.165613	-1.10695	-0.106048
3.63e-08	0.0924093	0.0909103	0.0183388	0.0154492	0.0136682		3.63e-08	0.74838		1.17926	-1.01621	-1.54447
3.6325e-08	0.0984814	0.0945178	0.0167325	0.015788	0.0149475		3.6325e-08	-1.56221		-0.293194	-0.669004	-0.257189
3.635e-08	0.0965838	0.0927141	0.0172679	0.015788	0.0144762		3.635e-08	-0.572502		0.238566	-0.641996	-0.69928
3.6375e-08	0.0971531	0.103717	0.0171341	0.0148394	0.0158901		3.6375e-08	-1.23453		0.143471	-1.51387	0.723976
3.64e-08	0.0939273	0.0932552	0.0176695	0.0166012	0.0149475		3.64e-08	-0.722144		0.676555	0.183183	-0.185005
3.6425e-08	0.0908913	0.0984862	0.0169333	0.0162624	0.0137355		3.6425e-08	-1.69041		0.015512	-0.110693	-1.3625
3.645e-08	0.092599	0.0984862	0.0179372	0.0168044	0.0164961		3.645e-08	-0.436504		0.990131	0.431772	1.39976
3.6475e-08	0.0992404	0.0943375	0.0182719	0.0164656	0.0145435		3.6475e-08	-1.97336		1.33635	0.137517	-0.513893
3.65e-08	0.0916503	0.0912711	0.0171341	0.0151104	0.0157555		3.65e-08	0.199135		0.295394	-1.12468	0.714369
3.6525e-08	0.0886142	0.0937963	0.0170671	0.0175498	0.0153515		3.6525e-08	0.364675		0.262596	1.22547	0.337267
3.655e-08	0.0965838	0.0923533	0.0167325	0.0184984	0.0166981		3.655e-08	-0.869		-0.0231622	2.1584	1.70212
3.6575e-08	0.0975326	0.0999292	0.0165986	0.0156525	0.0156881		3.6575e-08	-0.222661		-0.119775	-0.528175	0.721378
3.66e-08	0.102276	0.0974039	0.0178034	0.017211	0.0141395		3.66e-08	-1.15213		1.04973	0.987177	-0.798061
3.6625e-08	0.0984814	0.0948786	0.0165986	0.015246	0.0137355		3.6625e-08	1.68637		-0.060235	-0.863198	-1.17781
3.665e-08	0.104174	0.10498	0.0158624	0.0167367	0.0160248		3.665e-08	-1.69957		-0.728278	0.589619	1.13143
3.6675e-08	0.0946863	0.0943375	0.0153939	0.01694	0.0159574		3.6675e-08	-1.84233		-1.14363	0.812053	1.08905
3.67e-08	0.0870962	0.0903692	0.0165986	0.0153815	0.0142742		3.67e-08	-1.01891		0.0291711	-0.653797	-0.569819
3.6725e-08	0.0948761	0.0934356	0.0154608	0.0163979	0.0152841		3.6725e-08	-1.9528		-1.02253	0.347919	0.464759
3.675e-08	0.0977223	0.101372	0.0157955	0.0151104	0.0138029		3.675e-08	-0.556381		-0.675357	-0.860791	-0.995
3.6775e-08	0.0878552	0.0963216	0.016197	0.0145684	0.0142742		3.6775e-08	-1.71152		-0.263878	-1.35539	-0.499305
3.68e-08	0.088804	0.0905495	0.0157955	0.0162624	0.0164961		3.68e-08	-0.312883		-0.617317	0.29991	1.75387
3.6825e-08	0.0893732	0.0892869	0.0147915	0.0149072	0.0161594		3.6825e-08	-0.85232		-1.54625	-0.977518	1.441
3.685e-08	0.0914605	0.0914514	0.0178034	0.0140941	0.0162268		3.685e-08	0.372462		1.3582	-1.73492	1.53363
3.6875e-08	0.0842499	0.0882046	0.0180041	0.0168722	0.0148802		3.6875e-08	-0.785638		1.5809	0.969847	0.204039
3.69e-08	0.088045	0.0932552	0.0178034	0.0148394	0.0153515		3.69e-08	-0.840722		1.41973	-0.964585	0.702468
3.6925e-08	0.100758	0.0923533	0.016197	0.0161268	0.0154188		3.6925e-08	-0.586376		-0.0879028	0.30533	0.79464
3.695e-08	0.0929785	0.0966824	0.0129844	0.0160591	0.0155535		3.695e-08	-0.508747		-3.1383	0.266999	0.954831
3.6975e-08	0.0939273	0.0961412	0.0188742	0.0147716	0.0144088		3.6975e-08	-0.431048		2.53971	-0.951892	-0.175786
3.7e-08	0.085768	0.0916318	0.017201	0.0181596	0.0158228		3.7e-08	-0.574896		0.964404	2.35605	1.27587
3.7025e-08	0.0960146	0.093616	0.0151931	0.0148394	0.0145435		3.7025e-08	-2.27154		-0.935683	-0.834178	0.0074625
3.705e-08	0.0956351	0.0970431	0.0175356	0.0157203	0.0149475		3.705e-08	-0.86332		1.34681	0.0466382	0.439782
3.7075e-08	0.0851987	0.0930748	0.0178034	0.017482	0.0132642		3.7075e-08	0.191575		1.63511	1.78448	-1.24047
3.71e-08	0.0891835	0.0918122	0.0165317	0.0160591	0.0146108		3.71e-08	1.55921		0.439799	0.429452	0.146556
3.7125e-08	0.0986711	0.0853186	0.0157285	0.0166012	0.0143415		3.7125e-08	-0.230102		-0.30571	0.983886	-0.102888
3.715e-08	0.0867167	0.0975843	0.0134529	0.0153137	0.0134662		3.715e-08	-0.0185395		-2.47488	-0.242337	-0.967754
3.7175e-08	0.0950658	0.0860401	0.0155947	0.0142973	0.0143415		3.7175e-08	0.505177		-0.377499	-1.20657	-0.055956
3.72e-08	0.090322	0.0946982	0.0154608	0.0147039	0.0126582		3.72e-08	-0.620279		-0.478318	-0.784411	-1.74354
3.7225e-08	0.0939273	0.100831	0.0165317	0.0156525	0.0143415		3.7225e-08	-1.12271		0.587542	0.167724	-0.00897624
3.725e-08	0.0908913	0.0896477	0.0145238	0.0159236	0.0142742		3.725e-08	-1.53662		-1.3296	0.459299	-0.0540463
3.7275e-08	0.0969633	0.0925337	0.0174687	0.0149072	0.0123216		3.7275e-08	-0.744484		1.55592	-0.507927	-2.02027
3.73e-08	0.0965838	0.0961412	0.0141891	0.015246	0.0134662		3.73e-08	-1.11405		-1.59933	-0.150259	-0.831217
3.7325e-08	0.0869065	0.0874831	0.0147915	0.0154492	0.0142068		3.7325e-08	0.529941		-0.986365	0.0751807	-0.0526147
3.735e-08	0.0912708	0.0871224	0.0155947	0.0154492	0.0159574		3.735e-08	-2.43728		-0.176919	0.101607	1.75879
3.7375e-08	0.0984814	0.0892869	0.0178034	0.0147039	0.0133315		3.7375e-08	-1.32985		2.00308	-0.603555	-0.900788
3.74e-08	0.0956351	0.0909103	0.0167994	0.0140941	0.0140722		3.74e-08	-0.175974		1.05484	-1.17685	-0.120474
3.7425e-08	0.0908913	0.0901888	0.015327	0.0147039	0.0146782		3.7425e-08	-0.771277		-0.352422	-0.551944	0.523193
3.745e-08	0.090322	0.0880243	0.0179372	0.0150427	0.0146108		3.745e-08	-0.424067		2.2257	-0.192699	0.477925
3.7475e-08	0.0891835	0.0891065	0.0145907	0.0155848	0.0150148		3.7475e-08	-0.525988		-1.0155	0.367358	0.915902
3.75e-08	0.088045	0.0880243	0.0138545	0.0146361	0.0140048		3.75e-08	-1.70795		-1.70833	-0.541263	-0.0966801
3.7525e-08	0.0901323	0.0882046	0.0145238	0.0141618	0.0136682		3.7525e-08	-0.820437		-1.02573	-0.983543	-0.419338
3.755e-08	0.089563	0.0835148	0.0159293	0.0145006	0.0162268		3.755e-08	0.248624		0.379908	-0.623672	2.23373
3.7575e-08	0.0908913	0.0836952	0.0142561	0.013552	0.0134662		3.7575e-08	-1.07079		-1.23341	-1.53578	-0.581482
3.76e-08	0.0943068	0.099388	0.0155277	0.0142973	0.0126582		3.76e-08	-1.21888		0.0430221	-0.773682	-1.39076
3.7625e-08	0.0931683	0.0921729	0.0151931	0.0150427	0.0140048		3.7625e-08	-1.50276		-0.257594	-0.0103011	0.018885
3.765e-08	0.0829217	0.0851382	0.0154608	0.0144328	0.0139375		3.765e-08	-0.838002		0.0340061	-0.588641	-0.0274468
3.7675e-08	0.0901323	0.0887458	0.0172679	0.0138908	0.0151495		3.7675e-08	-1.25785		1.84252	-1.10081	1.24652
3.77e-08	0.0853885	0.0932552	0.0167325	0.015246	0.0135335		3.77e-08	-0.954158		1.34465	0.269613	-0.398601
3.7725e-08	0.0931683	0.085499	0.0170671	0.0141618	0.0133315		3.7725e-08	0.346499		1.7045	-0.781391	-0.584669
3.775e-08	0.090322	0.0842363	0.0155277	0.0130099	0.0137355		3.775e-08	-0.662859		0.213717	-1.90168	-0.144126
3.7775e-08	0.0907015	0.0919926	0.0145907	0.0151104	0.0137355		3.7775e-08	0.594537		-0.684347	0.213364	-0.121239
3.78e-08	0.0834909	0.0873027	0.0153939	0.0148394	0.0126582		3.78e-08	0.764195		0.138031	-0.030614	-1.21475
3.7825e-08	0.0876655	0.093616	0.0145907	0.0145684	0.0160921		3.7825e-08	-0.656113		-0.629353	-0.275088	2.36849
3.785e-08	0.0929785	0.0901888	0.0184057	0.0139585	0.0142742		3.785e-08	0.240259		3.18076	-0.858153	0.506384
3.7875e-08	0.0831114	0.0903692	0.0167325	0.013823	0.0150821		3.7875e-08	-1.00069		1.55114	-0.968515	1.36896
3.79e-08	0.0912708	0.0914514	0.0142561	0.0154492	0.0133315		3.79e-08	0.0787696		-0.87937	0.682122	-0.426992
3.7925e-08	0.0884245	0.0844167	0.0135198	0.0155848	0.0137355		3.7925e-08	-0.754171		-1.58421	0.844044	0.0158505
3.795e-08	0.0798856	0.0845971	0.015327	0.0153137	0.0149475		3.795e-08	-2.22687		0.240772	0.599073	1.30069
3.7975e-08	0.0889937	0.0903692	0.0155947	0.0140941	0.0135335		3.7975e-08	-1.96757		0.535655	-0.597201	-0.148889
3.8e-08	0.0870962	0.0896477	0.0147915	0.0143651	0.0128602		3.8e-08	-3.85451		-0.236725	-0.300149	-0.828399
3.8025e-08	0.0944966	0.0815307	0.0161301	0.0139585	0.0119849		3.8025e-08	0.426074		1.12684	-0.683006	-1.71989
3.805e-08	0.0855782	0.0838756	0.0135198	0.0142296	0.0132642		3.805e-08	-0.821584		-1.45177	-0.385661	-0.36218
3.8075e-08	0.0897528	0.088385	0.0138545	0.0143651	0.0150821		3.8075e-08	-0.697897		-1.09078	-0.224175	1.56076
3.81e-08	0.086527	0.0896477	0.0155277	0.0147039	0.0129276		3.81e-08	-1.81093		0.610467	0.142173	-0.669588
3.8125e-08	0.0798856	0.0842363	0.0151262	0.0158558	0.0146108		3.8125e-08	0.0999842		0.236447	1.32838	1.1151
3.815e-08	0.093358	0.085499	0.0154608	0.0137553	0.0121196		3.815e-08	-0.0508238		0.599864	-0.763292	-1.47203
3.8175e-08	0.0840602	0.0851382	0.0156616	0.0159913	0.0133315		3.8175e-08	-1.85477		0.829585	1.51838	-0.179485
3.82e-08	0.0931683	0.0809895	0.0138545	0.0139585	0.0144088		3.82e-08	-0.307368		-0.957235	-0.508371	0.973763
3.8225e-08	0.0927888	0.0853186	0.0159293	0.0128066	0.0128602		3.8225e-08	0.230721		1.1556	-1.64806	-0.629573
3.825e-08	0.088045	0.0867616	0.0146577	0.0142973	0.0145435		3.825e-08	2.01199		-0.0955106	-0.115588	1.16215
3.8275e-08	0.0861475	0.0871224	0.0153939	0.0147716	0.0150148		3.8275e-08	-1.63796		0.673525	0.390045	1.68153
3.83e-08	0.0848192	0.0827933	0.0131183	0.0124001	0.0126582		3.83e-08	-0.777156		-1.59275	-1.98844	-0.776026
3.8325e-08	0.0956351	0.0831541	0.0139214	0.0143651	0.0145435		3.8325e-08	0.684448		-0.756297	0.028759	1.23257
3.835e-08	0.0853885	0.0882046	0.0128505	0.0138908	0.0127256		3.835e-08	-1.31331		-1.81133	-0.427675	-0.661283
3.8375e-08	0.0793164	0.0885654	0.0144569	0.0141618	0.0117156		3.8375e-08	-1.74374		-0.161626	-0.127403	-1.70538
3.84e-08	0.085009	0.078825	0.0144569	0.0143651	0.0147455		3.84e-08	-1.34288		-0.134451	0.104431	1.51629
3.8425e-08	0.0783676	0.0781035	0.0131852	0.0128066	0.0127256		3.8425e-08	0.0761639		-1.39534	-1.45702	-0.595493
3.845e-08	0.0789369	0.0795465	0.0159293	0.0154492	0.0118503		3.845e-08	-0.0766417		1.41279	1.25969	-1.49963
3.8475e-08	0.0869065	0.0865812	0.0158624	0.0137553	0.0133989		3.8475e-08	0.743129		1.37346	-0.441748	0.161369
3.85e-08	0.0863372	0.0853186	0.0166656	0.0113837	0.0133315		3.85e-08	-0.985752		2.21776	-2.83786	0.112537
3.8525e-08	0.0810242	0.0835148	0.0151931	0.0129421	0.0146108		3.8525e-08	-2.06771		0.750002	-1.22307	1.49174
3.855e-08	0.0893732	0.0800876	0.0150592	0.0125356	0.0128602		3.855e-08	-0.644081		0.641597	-1.61485	-0.342859
3.8575e-08	0.09184	0.0824326	0.0142561	0.0144328	0.0130622		3.8575e-08	1.57155		-0.148793	0.3504	-0.106289
3.86e-08	0.0840602	0.0757586	0.0143899	0.0127389	0.0134662		3.86e-08	0.674965		0.0145624	-1.35954	0.345353
3.8625e-08	0.0831114	0.0844167	0.0147915	0.0142296	0.0138702		3.8625e-08	0.428451		0.451354	0.192437	0.79768
3.865e-08	0.0901323	0.0891065	0.0155277	0.0132809	0.0131295		3.865e-08	-2.79895		1.23071	-0.755882	0.0319143
3.8675e-08	0.0781779	0.085499	0.0140553	0.0146361	0.0144088		3.8675e-08	-0.858177		-0.246464	0.660072	1.41742
3.87e-08	0.0808344	0.0824326	0.0133191	0.0116547	0.0151495		3.87e-08	-1.01332		-0.973059	-2.37894	2.23066
3.8725e-08	0.086527	0.0829737	0.0138545	0.0128066	0.0131969		3.8725e-08	-1.30875		-0.39862	-1.17113	0.170556
3.875e-08	0.087286	0.0808092	0.0149923	0.0145006	0.0125236		3.875e-08	0.870908		0.79432	0.596864	-0.526352
3.8775e-08	0.0834909	0.0824326	0.014323	0.0141618	0.0131969		3.8775e-08	0.716612		0.135149	0.273011	0.215166
3.88e-08	0.0814037	0.0811699	0.0150592	0.0136875	0.0127929		3.88e-08	0.0942718		0.91818	-0.191253	-0.194783
3.8825e-08	0.0848192	0.0826129	0.0121812	0.0139585	0.0121196		3.8825e-08	0.173172		-2.01271	0.113047	-0.893813
3.885e-08	0.0796959	0.0826129	0.0135868	0.0120613	0.010571		3.885e-08	-1.29387		-0.541703	-1.82246	-2.53197
3.8875e-08	0.0793164	0.0844167	0.014323	0.0145684	0.0125909		3.8875e-08	-0.512755		0.242677	0.79314	-0.345691
3.89e-08	0.0787471	0.0871224	0.0141891	0.0142973	0.0129949		3.89e-08	-2.12341		0.131575	0.537914	0.109648
3.8925e-08	0.0829217	0.0851382	0.0158624	0.0139585	0.0122542		3.8925e-08	0.348468		1.88472	0.212032	-0.663812
3.895e-08	0.0815934	0.081711	0.0132521	0.0140263	0.0121869		3.895e-08	0.0046318		-0.782523	0.307062	-0.714713
3.8975e-08	0.0814037	0.0874831	0.014323	0.0134842	0.0119849		3.8975e-08	-0.386786		0.350286	-0.230582	-0.910603
3.9e-08	0.0901323	0.0845971	0.0133191	0.0125356	0.0130622		3.9e-08	1.52709		-0.661498	-1.19144	0.270588
3.9025e-08	0.09184	0.088385	0.0158624	0.0128066	0.0119176		3.9025e-08	0.429748		1.99816	-0.886243	-0.940686
3.905e-08	0.0819729	0.0831541	0.0141891	0.013552	0.0132642		3.905e-08	0.461854		0.292135	-0.0871382	0.532697
3.9075e-08	0.087286	0.0845971	0.012449	0.0134842	0.0132642		3.9075e-08	-0.590827		-1.48653	-0.133368	0.554979
3.91e-08	0.0846294	0.0791858	0.014323	0.0136875	0.0141395		3.91e-08	-0.0403157		0.484469	0.102728	1.52271
3.9125e-08	0.089563	0.077382	0.0145907	0.0134842	0.0118503		3.9125e-08	0.274773		0.789512	-0.084863	-0.928956
3.915e-08	0.0817832	0.0847775	0.0137876	0.0131454	0.0123216		3.915e-08	0.401175		-0.0189596	-0.41428	-0.397985
3.9175e-08	0.085768	0.0790054	0.0131183	0.0129421	0.0114463		3.9175e-08	-1.55379		-0.689563	-0.602696	-1.3242
3.92e-08	0.0772291	0.0772016	0.0128505	0.0145006	0.0116483		3.92e-08	1.03309		-0.942899	1.05084	-1.08458
3.9225e-08	0.0831114	0.0836952	0.0137206	0.0127389	0.0125236		3.9225e-08	-0.924429		-0.0098222	-0.767837	-0.114436
3.925e-08	0.0844397	0.0804484	0.01526	0.0109093	0.0129276		3.925e-08	-0.419445		1.62373	-2.66068	0.345685
3.9275e-08	0.0814037	0.077382	0.0127836	0.0117225	0.0138702		3.9275e-08	-0.578005		-0.936626	-1.78625	1.39154
3.93e-08	0.0833012	0.0851382	0.0119805	0.0158558	0.0119849		3.93e-08	0.26033		-1.75148	2.57362	-0.635004
3.9325e-08	0.0791266	0.0786446	0.0135868	0.0130099	0.0137355		3.9325e-08	-1.03848		-0.0451931	-0.388897	1.29061
3.935e-08	0.0825422	0.0871224	0.0155277	0.0134165	0.0144088		3.935e-08	-2.24418		2.01484	0.0622139	2.04633
3.9375e-08	0.088045	0.0795465	0.0131852	0.0128066	0.0123889		3.9375e-08	-0.881861		-0.414397	-0.555221	-0.131381
3.94e-08	0.0762804	0.0811699	0.0125159	0.0134842	0.0108403		3.94e-08	0.0537894		-1.09144	0.181836	-1.79861
3.9425e-08	0.0762804	0.0813503	0.0127167	0.0139585	0.0121869		3.9425e-08	-0.677385		-0.855433	0.705911	-0.30881
3.945e-08	0.0776086	0.075939	0.014323	0.012129	0.0102343		3.945e-08	-0.408066		0.859279	-1.19909	-2.4201
3.9475e-08	0.0819729	0.0820718	0.0136537	0.0136875	0.0116483		3.9475e-08	-0.32932		0.181439	0.469123	-0.854884
3.95e-08	0.0804549	0.085499	0.0133191	0.0132132	0.0108403		3.95e-08	-2.06569		-0.145084	-0.00760993	-1.71788
3.9525e-08	0.0802651	0.0799073	0.0121812	0.0125356	0.0131295		3.9525e-08	-0.506193		-1.31935	-0.70019	0.808584
3.955e-08	0.0776086	0.0743156	0.0137206	0.0126711	0.0127929		3.955e-08	-0.331745		0.330293	-0.533451	0.461843
3.9575e-08	0.0779881	0.0730529	0.0139214	0.0130099	0.0130622		3.9575e-08	-0.39645		0.568516	-0.15116	0.778986
3.96e-08	0.0783676	0.0799073	0.0121143	0.0123323	0.0125236		3.96e-08	-2.76106		-1.31635	-0.84583	0.209908
3.9625e-08	0.0787471	0.0835148	0.0129175	0.0117225	0.0127256		3.9625e-08	-0.909896		-0.441679	-1.46983	0.45333
3.965e-08	0.0783676	0.0809895	0.0149923	0.0127389	0.0126582		3.965e-08	-0.447547		1.78186	-0.367874	0.401084
3.9675e-08	0.0726751	0.0791858	0.0122482	0.0145684	0.0128602		3.9675e-08	-1.42515		-1.10083	1.60022	0.644999
3.97e-08	0.0812139	0.0827933	0.0138545	0.0117902	0.0130622		3.97e-08	-0.626233		0.628818	-1.33006	0.889278
3.9725e-08	0.0808344	0.0761193	0.0133191	0.0134842	0.0117156		3.9725e-08	0.270021		0.0862115	0.49622	-0.572296
3.975e-08	0.0679313	0.0882046	0.0139884	0.0119257	0.0130622		3.975e-08	-1.09439		0.823609	-1.14039	0.933447
3.9775e-08	0.0812139	0.0734137	0.0116458	0.013823	0.0113116		3.9775e-08	-1.30495		-1.64329	0.905883	-0.97631
3.98e-08	0.071157	0.0748567	0.0146577	0.0126033	0.010975		3.98e-08	-0.118079		1.5892	-0.371657	-1.3276
3.9825e-08	0.0774189	0.0800876	0.0139214	0.0137553	0.0115136		3.9825e-08	-0.7624		0.831096	0.882314	-0.712049
3.985e-08	0.0789369	0.0770212	0.0130513	0.0153815	0.0117156		3.985e-08	-0.394039		-0.0713032	2.64556	-0.467955
3.9875e-08	0.088045	0.0687239	0.0135868	0.0126711	0.0127929		3.9875e-08	-0.653188		0.525982	-0.229296	0.74546
3.99e-08	0.0817832	0.0784642	0.0131852	0.0115192	0.0116483		3.99e-08	-1.34789		0.122495	-1.43978	-0.500859
3.9925e-08	0.0796959	0.0793661	0.0137206	0.0130777	0.0130622		3.9925e-08	-0.398781		0.720977	0.253264	1.08767
3.995e-08	0.0827319	0.0761193	0.0125828	0.0117225	0.0133989		3.995e-08	-0.222965		-0.471704	-1.17704	1.4833
3.9975e-08	0.0785574	0.0752174	0.0126498	0.0130099	0.0109076		3.9975e-08	0.486044		-0.375027	0.228008	-1.26091
4e-08	0.0694493	0.0844167	0.0136537	0.0111804	0.0127256		4e-08	-0.937399		0.727232	-1.71464	0.779693
4.0025e-08	0.0740033	0.0741352	0.0122482	0.0113837	0.0117829		4.0025e-08	-2.02333		-0.75642	-1.474	-0.247033
4.005e-08	0.0787471	0.0853186	0.0127836	0.0112481	0.0121196		4.005e-08	0.142668		-0.156309	-1.59777	0.148605
4.0075e-08	0.0717263	0.0752174	0.0125828	0.011858	0.0123889		4.0075e-08	0.902556		-0.347342	-0.918656	0.46981
4.01e-08	0.0821627	0.0791858	0.0122482	0.0140263	0.0113789		4.01e-08	0.836764		-0.682937	1.44231	-0.63481
4.0125e-08	0.0787471	0.0876635	0.012449	0.0141618	0.0111096		4.0125e-08	-1.66269		-0.442026	1.61311	-0.914805
4.015e-08	0.0814037	0.0772016	0.0138545	0.0128066	0.0135335		4.015e-08	-0.415565		1.09907	0.173769	1.81219
4.0175e-08	0.0777984	0.0842363	0.012449	0.0124678	0.0113789		4.0175e-08	-2.7736		-0.392644	-0.169111	-0.573242
4.02e-08	0.0757111	0.0795465	0.0117797	0.0103673	0.0133315		4.02e-08	0.620718		-1.09134	-2.41906	1.63116
4.0225e-08	0.0789369	0.070708	0.0134529	0.0105028	0.0123216		4.0225e-08	-0.763853		0.742883	-2.25109	0.52296
4.025e-08	0.0798856	0.0791858	0.0132521	0.0124678	0.0117156		4.025e-08	0.536333		0.551148	-0.0997074	-0.134483
4.0275e-08	0.0738136	0.0743156	0.0125828	0.0119935	0.0113116		4.0275e-08	-0.997094		-0.148777	-0.591198	-0.566566
4.03e-08	0.070398	0.073594	0.0132521	0.0111126	0.0104363		4.03e-08	-1.35864		0.602023	-1.52505	-1.52819
4.0325e-08	0.0677415	0.0822522	0.0139214	0.0117902	0.0112443		4.0325e-08	-1.72076		1.35411	-0.766864	-0.6013
4.035e-08	0.0741931	0.0734137	0.0112442	0.0124678	0.010975		4.035e-08	-0.368523		-1.52924	-0.00744086	-0.883591
4.0375e-08	0.0734341	0.0772016	0.0120474	0.0134165	0.0109076		4.0375e-08	0.740496		-0.632219	1.04829	-0.939191
4.04e-08	0.0785574	0.0784642	0.0127836	0.0130099	0.0129949		4.04e-08	-1.38763		0.193517	0.629261	1.43012
4.0425e-08	0.0719161	0.0853186	0.0129175	0.0128066	0.0129276		4.0425e-08	-0.326955		0.364332	0.431164	1.37621
4.045e-08	0.0777984	0.075939	0.013386	0.0124678	0.0115136		4.045e-08	0.391234		0.900412	0.0848003	-0.19583
4.0475e-08	0.0810242	0.0753978	0.0132521	0.0111804	0.0118503		4.0475e-08	-0.315816		0.779847	-1.29839	0.204615
4.05e-08	0.0766599	0.0658378	0.0133191	0.0116547	0.0115136		4.05e-08	0.10807		0.878391	-0.757974	-0.154563
4.0525e-08	0.0738136	0.0743156	0.0119805	0.0127389	0.0111769		4.0525e-08	-1.24062		-0.560068	0.450568	-0.514358
4.055e-08	0.0777984	0.075939	0.0127836	0.0107061	0.0125236		4.055e-08	-0.225338		0.343166	-1.75227	1.02876
4.0575e-08	0.0677415	0.078825	0.0121812	0.0136197	0.0102343		4.0575e-08	0.298145		-0.291916	1.46255	-1.54061
4.06e-08	0.0753316	0.0757586	0.0121143	0.0122645	0.0121869		4.06e-08	-0.263688		-0.341051	2.142e-05	0.690391
4.0625e-08	0.0766599	0.0712491	0.012449	0.0117225	0.0111769		4.0625e-08	1.05088		0.0504376	-0.572319	-0.433256
4.065e-08	0.0747623	0.0723314	0.0109096	0.0111126	0.0106383		4.065e-08	-0.549598		-1.61611	-1.22011	-1.02403
4.0675e-08	0.0764701	0.0809895	0.0119805	0.0123323	0.010773		4.0675e-08	-0.27242		-0.415622	0.142974	-0.851336
4.07e-08	0.06888	0.075939	0.0130513	0.0126033	0.0109076		4.07e-08	-0.63856		0.787003	0.464203	-0.678393
4.0725e-08	0.0753316	0.0701669	0.0129175	0.0115869	0.010975		4.0725e-08	-1.5999		0.664717	-0.632318	-0.581766
4.075e-08	0.0705878	0.0762997	0.0126498	0.0124678	0.00962833		4.075e-08	0.759674		0.394569	0.361092	-2.09409
4.0775e-08	0.0768496	0.0696257	0.0117797	0.0113837	0.0108403		4.0775e-08	1.13776		-0.540852	-0.812266	-0.694915
4.08e-08	0.0749521	0.0752174	0.0133191	0.013552	0.0116483		4.08e-08	0.821119		1.18321	1.60442	0.245957
4.0825e-08	0.0772291	0.0734137	0.0134529	0.0105705	0.0112443		4.0825e-08	-2.42827		1.35651	-1.66716	-0.194196
4.085e-08	0.0825422	0.078825	0.012382	0.0110449	0.0107056		4.085e-08	0.534456		0.197062	-1.12127	-0.788807
4.0875e-08	0.0685005	0.0757586	0.0129175	0.0123323	0.0121869		4.0875e-08	-1.72466		0.814426	0.325825	0.923332
4.09e-08	0.0817832	0.0761193	0.0104411	0.0122645	0.0125236		4.09e-08	0.54555		-1.90564	0.273557	1.32941
4.0925e-08	0.071157	0.0672808	0.0119135	0.0119257	0.0124562		4.0925e-08	0.127304		-0.249535	-0.0794332	1.27383
4.095e-08	0.0745726	0.0757586	0.0115789	0.0124678	0.010571		4.095e-08	-1.88794		-0.597187	0.544765	-0.863696
4.0975e-08	0.0721058	0.0764801	0.0119805	0.0126711	0.0121196		4.0975e-08	-1.06067		-0.127226	0.793586	0.930855
4.1e-08	0.0772291	0.0739548	0.0110434	0.0102317	0.0117156		4.1e-08	-1.48118		-1.1456	-1.89562	0.488612
4.1025e-08	0.0692595	0.0775624	0.0122482	0.0124001	0.0117156		4.1025e-08	2.49739		0.218859	0.538255	0.509348
4.105e-08	0.0755213	0.0750371	0.0137206	0.0115869	0.010773		4.105e-08	-0.122651		1.88404	-0.344544	-0.552812
4.1075e-08	0.0732443	0.0772016	0.0110434	0.0128066	0.0125909		4.1075e-08	-1.0442		-1.07654	1.03715	1.55708
4.11e-08	0.0722956	0.0725118	0.0130513	0.0119257	0.0114463		4.11e-08	-0.964995		1.18812	0.0775771	0.261578
4.1125e-08	0.0749521	0.081711	0.0104411	0.0111126	0.0102343		4.1125e-08	-2.03911		-1.70368	-0.807992	-1.11352
4.115e-08	0.0785574	0.0777427	0.010508	0.0123323	0.010571		4.115e-08	0.24745		-1.60644	0.576701	-0.706197
4.1175e-08	0.0776086	0.0728725	0.0139214	0.0113159	0.0115809		4.1175e-08	0.478272		2.23712	-0.537364	0.478269
4.12e-08	0.0717263	0.0710688	0.0120474	0.0132132	0.0117829		4.12e-08	-1.20046		0.163287	1.60839	0.732018
4.1225e-08	0.0652747	0.0777427	0.0119135	0.0120613	0.0121869		4.1225e-08	-1.62433		0.0371958	0.341422	1.21946
4.125e-08	0.0776086	0.0717903	0.0119805	0.010435	0.0115136		4.125e-08	-2.60254		0.136195	-1.45962	0.462263
4.1275e-08	0.0719161	0.073594	0.011445	0.00948638	0.0107056		4.1275e-08	-2.17182		-0.441428	-2.5033	-0.451969
4.13e-08	0.0802651	0.0705276	0.0125159	0.0111126	0.0103016		4.13e-08	0.124677		0.786063	-0.656592	-0.899941
4.1325e-08	0.0664132	0.0750371	0.0122482	0.0124001	0.0104363		4.1325e-08	0.558028		0.509152	0.812299	-0.724511
4.135e-08	0.0740033	0.0680023	0.012382	0.0136197	0.0127929		4.135e-08	0.335673		0.684053	2.20738	2.02779
4.1375e-08	0.0713468	0.0719707	0.0119805	0.0116547	0.0102343		4.1375e-08	0.0118776		0.255539	0.0185187	-0.919919
4.14e-08	0.065844	0.0723314	0.0123151	0.00968966	0.0104363		4.14e-08	-1.22256		0.657036	-2.17405	-0.66598
4.1425e-08	0.0736238	0.073594	0.0123151	0.00989294	0.0116483		4.1425e-08	-1.85173		0.681245	-1.92453	0.762295
4.145e-08	0.071157	0.0708884	0.0111104	0.0113159	0.0107056		4.145e-08	-0.000714653		-0.656463	-0.297675	-0.313611
4.1475e-08	0.071157	0.0710688	0.0117127	0.0107738	0.010975		4.1475e-08	-0.0219129		0.0481211	-0.888369	0.0197244
4.15e-08	0.068121	0.0687239	0.0123151	0.0131454	0.0109076		4.15e-08	0.00753826		0.753907	1.81478	-0.0386956
4.1525e-08	0.0726751	0.0723314	0.0121812	0.0113159	0.010975		4.1525e-08	-3.26171		0.626359	-0.232348	0.059763
4.155e-08	0.0743828	0.0674612	0.00997256	0.012129	0.0118503		4.155e-08	-0.085861		-1.85542	0.710432	1.10118
4.1575e-08	0.0677415	0.0734137	0.0111104	0.0114514	0.010571		4.1575e-08	-0.717203		-0.541642	-0.0352726	-0.372066
4.16e-08	0.0715365	0.0647555	0.0141222	0.0113159	0.00996499		4.16e-08	0.0237803		2.90433	-0.167211	-1.06071
4.1625e-08	0.0686903	0.0768408	0.0117127	0.0117225	0.0116483		4.1625e-08	-1.21935		0.189383	0.316176	0.927224
4.165e-08	0.0749521	0.0753978	0.0129844	0.0125356	0.0105036		4.165e-08	0.337269		1.66077	1.26242	-0.392074
4.1675e-08	0.0662235	0.0698061	0.012449	0.0128744	0.0117156		4.1675e-08	-0.295887		1.07542	1.6707	1.04731
4.17e-08	0.0685005	0.069265	0.012449	0.0107738	0.010773		4.17e-08	-1.38918		1.09972	-0.697479	-0.0371796
4.1725e-08	0.0728648	0.0710688	0.010508	0.0105705	0.0123889		4.1725e-08	0.272757		-1.09179	-0.907879	1.87871
4.175e-08	0.068121	0.0683631	0.0127836	0.0122645	0.0111096		4.175e-08	0.710941		1.53068	1.04494	0.397782
4.1775e-08	0.0656542	0.0680023	0.0113112	0.00989294	0.010773		4.1775e-08	-1.04884		-0.128677	-1.63924	0.0222573
4.18e-08	0.0705878	0.0716099	0.0108426	0.0106383	0.0119849		4.18e-08	0.20766		-0.641885	-0.767505	1.46743
4.1825e-08	0.069639	0.0681827	0.012449	0.0105028	0.0115136		4.1825e-08	-0.838292		1.22099	-0.901428	0.933553
4.185e-08	0.0709673	0.069265	0.0115789	0.0134165	0.0119849		4.185e-08	-1.42465		0.247465	2.4533	1.50918
4.1875e-08	0.0715365	0.0732333	0.0105749	0.0114514	0.0120522		4.1875e-08	0.0393819		-0.881455	0.226666	1.60942
4.19e-08	0.0700185	0.0609676	0.0111104	0.0114514	0.00875303		4.19e-08	-0.957898		-0.244091	0.248457	-2.262
4.1925e-08	0.0795061	0.064034	0.0125828	0.0106383	0.0111096		4.1925e-08	-0.570013		1.4717	-0.66246	0.538354
4.195e-08	0.0726751	0.0728725	0.0121143	0.0122645	0.0100996		4.195e-08	-0.284396		0.956932	1.22559	-0.634952
4.1975e-08	0.0713468	0.0676416	0.00930326	0.0121968	0.0110423		4.1975e-08	0.4131		-2.25688	1.17033	0.498941
4.2e-08	0.0669825	0.0669201	0.0105749	0.0100285	0.0115809		4.2e-08	-1.46214		-0.769893	-1.30066	1.15646
4.2025e-08	0.0700185	0.070708	0.0106419	0.0102317	0.0117829		4.2025e-08	-1.3827		-0.670386	-1.04628	1.41622
4.205e-08	0.0694493	0.0739548	0.0121143	0.0111126	0.010773		4.205e-08	-0.736088		1.05239	-0.0110027	0.239763
4.2075e-08	0.068121	0.0725118	0.00970484	0.012129	0.0114463		4.2075e-08	-1.27512		-1.70883	1.18219	1.05822
4.21e-08	0.0736238	0.0683631	0.0117127	0.0105028	0.00908968		4.21e-08	0.146897		0.6354	-0.671835	-1.71913
4.2125e-08	0.0757111	0.0649359	0.0101064	0.0099607	0.0113789		4.2125e-08	-0.444059		-1.20118	-1.27701	1.01894
4.215e-08	0.0626182	0.0683631	0.0117127	0.0109093	0.00949367		4.215e-08	-2.07009		0.682174	-0.1603	-1.20242
4.2175e-08	0.0620489	0.0671005	0.010508	0.0106383	0.00962833		4.2175e-08	0.234002		-0.691862	-0.452587	-1.02361
4.22e-08	0.065844	0.0674612	0.0100395	0.010164	0.00882036		4.22e-08	-0.306611		-1.21361	-0.980724	-1.96712
4.2225e-08	0.0705878	0.0717903	0.0111104	0.0113159	0.00929168		4.2225e-08	-0.226204		0.0524667	0.374503	-1.38744
4.225e-08	0.0721058	0.0667397	0.0110434	0.0107738	0.0114463		4.225e-08	-0.145707		-0.00258519	-0.232482	1.20086
4.2275e-08	0.0656542	0.0671005	0.00930326	0.00935086	0.0105036		4.2275e-08	0.765281		-2.00557	-1.8629	0.0960197
4.23e-08	0.0641362	0.0685435	0.0128505	0.010164	0.0100323		4.23e-08	-1.07513		2.14822	-0.898717	-0.447549
4.2325e-08	0.0713468	0.0651163	0.0118466	0.0109771	0.010975		4.2325e-08	0.876019		1.002	0.0670277	0.698444
4.235e-08	0.0694493	0.0708884	0.0113112	0.00955414	0.00996499		4.235e-08	-0.186897		0.400518	-1.56739	-0.490069
4.2375e-08	0.0662235	0.0689042	0.0112442	0.0119257	0.00902235		4.2375e-08	-0.522693		0.345239	1.21417	-1.59984
4.24e-08	0.0660337	0.0649359	0.0117127	0.0102995	0.0103016		4.24e-08	-0.859057		0.915873	-0.658994	-0.0487199
4.2425e-08	0.0662235	0.0654771	0.0103741	0.0102317	0.0113116		4.2425e-08	-1.30025		-0.62726	-0.717439	1.18181
4.245e-08	0.0700185	0.0699865	0.0108426	0.0115192	0.0111769		4.245e-08	-0.959575		-0.0565302	0.806076	1.04043
4.2475e-08	0.070398	0.0652967	0.0117797	0.00914758	0.0124562		4.2475e-08	-0.670642		1.06441	-1.94308	2.59718
4.25e-08	0.069639	0.0615088	0.0109765	0.0107061	0.0108403		4.25e-08	1.18618		0.145447	-0.101172	0.675982
4.2525e-08	0.0656542	0.0651163	0.0111773	0.0092831	0.0123889		4.2525e-08	0.431323		0.403811	-1.74555	2.5588
4.255e-08	0.0641362	0.0674612	0.012449	0.00975742	0.0119176		4.255e-08	0.564885		1.92128	-1.17041	2.01257
4.2575e-08	0.069639	0.0652967	0.0100395	0.00948638	0.010975		4.2575e-08	-0.453454		-0.889296	-1.46815	0.897545
4.26e-08	0.0595822	0.0743156	0.0098387	0.0110449	0.00902235		4.26e-08	-0.792085		-1.10419	0.380097	-1.43711
4.2625e-08	0.0741931	0.0698061	0.0101733	0.0102995	0.00908968		4.2625e-08	0.0225122		-0.688479	-0.473888	-1.33782
4.265e-08	0.0641362	0.0665593	0.0117127	0.0110449	0.00969566		4.265e-08	-1.47105		1.14898	0.422608	-0.587849
4.2675e-08	0.068121	0.0696257	0.0101733	0.00982518	0.0117829		4.2675e-08	-1.23363		-0.645109	-0.990708	1.95364
4.27e-08	0.0590129	0.0672808	0.0103741	0.0100285	0.0107056		4.27e-08	-0.417708		-0.386148	-0.731319	0.67121
4.2725e-08	0.0683108	0.0683631	0.010508	0.00955414	0.0105036		4.2725e-08	-1.70469		-0.205924	-1.26985	0.446348
4.275e-08	0.0629977	0.0616891	0.0119805	0.0105028	0.00996499		4.275e-08	-1.04589		1.55907	-0.13145	-0.186755
4.2775e-08	0.0652747	0.0651163	0.0098387	0.00968966	0.0113789		4.2775e-08	-1.59779		-0.95482	-1.07031	1.54651
4.28e-08	0.0647055	0.067822	0.00997256	0.0107061	0.00882036		4.28e-08	-2.20326		-0.774803	0.150075	-1.53776
4.2825e-08	0.0624284	0.0694454	0.0103741	0.00968966	0.010571		4.2825e-08	-1.12136		-0.276794	-1.03052	0.605864
4.285e-08	0.0633772	0.0609676	0.0112442	0.0105028	0.010773		4.285e-08	-0.143483		0.778566	-0.0486644	0.870811
4.2875e-08	0.0669825	0.0642144	0.0108426	0.0111126	0.00929168		4.2875e-08	-0.379485		0.323845	0.694096	-0.911075
4.29e-08	0.0614797	0.0645752	0.0101733	0.00833446	0.010975		4.29e-08	0.388771		-0.450275	-2.57685	1.15601
4.2925e-08	0.068121	0.0698061	0.0123151	0.0100962	0.010167		4.2925e-08	-1.59358		2.12216	-0.468799	0.191691
4.295e-08	0.0671723	0.0615088	0.0115789	0.0096219	0.0104363		4.295e-08	0.975335		1.26843	-1.01151	0.539134
4.2975e-08	0.0686903	0.0672808	0.0111104	0.00921534	0.010167		4.2975e-08	-1.91056		0.732569	-1.47466	0.229943
4.3e-08	0.0694493	0.0634929	0.0098387	0.00874102	0.0113789		4.3e-08	-0.451864		-0.763361	-2.01919	1.7288
4.3025e-08	0.0578744	0.0649359	0.00977177	0.00941862	0.00908968		4.3025e-08	0.265933		-0.822104	-1.19393	-1.04818
4.305e-08	0.0629977	0.0620499	0.00836624	0.00846998	0.0104363		4.305e-08	-1.13982		-2.48228	-2.30414	0.6166
4.3075e-08	0.0607207	0.0672808	0.0104411	0.0102317	0.010369		4.3075e-08	-0.527823		0.0215089	-0.185572	0.553529
4.31e-08	0.0679313	0.0600657	0.0107757	0.00975742	0.00902235		4.31e-08	-0.0745412		0.444345	-0.731045	-1.07648
4.3125e-08	0.0647055	0.0699865	0.00950405	0.00867326	0.00949367		4.3125e-08	-0.951495		-1.05867	-2.00556	-0.48081
4.315e-08	0.0614797	0.0618695	0.00997256	0.010164	0.0100323		4.315e-08	-0.711071		-0.475423	-0.205444	0.198359
4.3175e-08	0.0593924	0.0674612	0.00997256	0.0106383	0.010369		4.3175e-08	-0.310406		-0.454071	0.382118	0.630598
4.32e-08	0.0609104	0.069265	0.0109096	0.0120613	0.0100323		4.32e-08	-0.0692534		0.694069	2.10606	0.236291
4.3225e-08	0.0652747	0.0624106	0.00943712	0.010435	0.00902235		4.3225e-08	-0.0947452		-1.05578	0.180214	-0.986496
4.325e-08	0.0622387	0.0743156	0.0102403	0.00948638	0.00888769		4.325e-08	-1.45613		-0.0674909	-0.93651	-1.13419
4.3275e-08	0.0573051	0.0622303	0.0109096	0.0096219	0.00794506		4.3275e-08	0.121441		0.761072	-0.754274	-2.27711
4.33e-08	0.0667927	0.0618695	0.0106419	0.0103673	0.00962833		4.33e-08	0.310012		0.460293	0.160552	-0.185737
4.3325e-08	0.0620489	0.0566386	0.0105749	0.010164	0.00962833		4.3325e-08	-1.00065		0.401439	-0.0633041	-0.167202
4.335e-08	0.0736238	0.0568189	0.0127167	0.00867326	0.010167		4.335e-08	0.312745		3.01235	-1.83619	0.516175
4.3375e-08	0.0631875	0.0598854	0.00997256	0.0089443	0.009561		4.3375e-08	-0.35638		-0.283552	-1.49113	-0.213313
4.34e-08	0.0633772	0.064034	0.0107088	0.010164	0.00935901		4.34e-08	-0.1678		0.62925	-0.00254313	-0.444543
4.3425e-08	0.0667927	0.0649359	0.0101064	0.00982518	0.0113789		4.3425e-08	-1.26811		-0.0787489	-0.390814	2.07273
4.345e-08	0.0546486	0.0642144	0.00977177	0.0102995	0.00942634		4.345e-08	0.156284		-0.463252	0.201568	-0.324585
4.3475e-08	0.0605309	0.0607872	0.0103072	0.010435	0.00935901		4.3475e-08	0.237936		0.20792	0.385681	-0.389643
4.35e-08	0.0645157	0.0642144	0.0109096	0.0099607	0.00942634		4.35e-08	-0.48782		0.961544	-0.167153	-0.28785
4.3525e-08	0.0637567	0.054474	0.0102403	0.00921534	0.00834904		4.3525e-08	1.04801		0.169782	-1.04888	-1.60644
4.355e-08	0.0597719	0.0643948	0.0107088	0.0096219	0.00888769		4.355e-08	0.321728		0.761613	-0.537307	-0.920157
4.3575e-08	0.0584437	0.0609676	0.0106419	0.0105705	0.010167		4.3575e-08	0.133874		0.702065	0.631981	0.687712
4.36e-08	0.0647055	0.0629518	0.00990563	0.0100962	0.009561		4.36e-08	-0.486262		-0.173779	0.0773136	-0.0470397
4.3625e-08	0.0652747	0.0569993	0.0103072	0.0105028	0.00915702		4.3625e-08	-1.53966		0.33747	0.590959	-0.531504
4.365e-08	0.0626182	0.0604265	0.0101064	0.0102317	0.0106383		4.365e-08	-2.48655		0.113772	0.282241	1.33197
4.3675e-08	0.0605309	0.0651163	0.0104411	0.0100962	0.00807972		4.3675e-08	-0.999704		0.544282	0.137766	-1.83853
4.37e-08	0.0671723	0.0598854	0.0110434	0.00887654	0.0105036		4.37e-08	-1.29784		1.30311	-1.32625	1.20296
4.3725e-08	0.0645157	0.0598854	0.00930326	0.00941862	0.00902235		4.3725e-08	-1.43386		-0.805727	-0.647112	-0.627362
4.375e-08	0.0686903	0.0618695	0.00930326	0.0102317	0.0102343		4.375e-08	-0.865038		-0.78521	0.36347	0.905157
4.3775e-08	0.0538896	0.0620499	0.0108426	0.010164	0.010369		4.3775e-08	0.627322		1.12388	0.301094	1.09268
4.38e-08	0.0516126	0.0557367	0.0119135	0.00833446	0.00841637		4.38e-08	-1.30013		2.46092	-1.91236	-1.33203
4.3825e-08	0.0614797	0.0652967	0.0111773	0.00846998	0.00841637		4.3825e-08	-2.08896		1.57934	-1.72843	-1.31471
4.385e-08	0.063567	0.0598854	0.00903554	0.00955414	0.00767573		4.385e-08	-0.267867		-1.03268	-0.38415	-2.22584
4.3875e-08	0.0584437	0.0638537	0.00923633	0.00982518	0.00908968		4.3875e-08	-1.16609		-0.765332	-0.0328678	-0.435408
4.39e-08	0.0641362	0.0602461	0.00977177	0.00921534	0.00922435		4.39e-08	-0.431309		-0.0852055	-0.760038	-0.248372
4.3925e-08	0.063567	0.0645752	0.0111104	0.00989294	0.00983033		4.3925e-08	-2.14893		1.58657	0.0898833	0.531134
4.395e-08	0.0616694	0.0633125	0.00937019	0.00989294	0.00935901		4.395e-08	-1.74126		-0.538955	0.109811	-0.0428108
4.3975e-08	0.0601514	0.0589835	0.00963791	0.0108416	0.00895502		4.3975e-08	-1.0054		-0.187678	1.29463	-0.532938
4.4e-08	0.0637567	0.0618695	0.0108426	0.00867326	0.00915702		4.4e-08	0.114022		1.32274	-1.34928	-0.260694
4.4025e-08	0.0637567	0.0588031	0.00910247	0.0102317	0.00794506		4.4025e-08	0.41484		-0.808696	0.586282	-1.77017
4.405e-08	0.0624284	0.0665593	0.0102403	0.0096219	0.00814705		4.405e-08	-0.542578		0.620784	-0.144205	-1.49855
4.4075e-08	0.0552179	0.0573601	0.0091694	0.0102317	0.00841637		4.4075e-08	1.01775		-0.685365	0.626706	-1.14155
4.41e-08	0.0593924	0.0645752	0.00910247	0.00853774	0.00929168		4.41e-08	0.00447402		-0.748176	-1.44183	-0.018515
4.4125e-08	0.0601514	0.0652967	0.0101733	0.0089443	0.0114463		4.4125e-08	0.0865684		0.601816	-0.92164	2.72359
4.415e-08	0.0620489	0.0593442	0.00930326	0.00880878	0.00935901		4.415e-08	0.058946		-0.45829	-1.07011	0.102948
4.4175e-08	0.0590129	0.0602461	0.00977177	0.00941862	0.00908968		4.4175e-08	-0.078634		0.144915	-0.297541	-0.219858
4.42e-08	0.0597719	0.0651163	0.00977177	0.0089443	0.00888769		4.42e-08	0.827965		0.165826	-0.864907	-0.457859
4.4225e-08	0.0639465	0.0562778	0.00963791	0.0102995	0.00834904		4.4225e-08	-1.50978		0.0199339	0.831884	-1.12319
4.425e-08	0.0597719	0.0580816	0.0103741	0.00867326	0.00908968		4.425e-08	-1.53885		0.958912	-1.16292	-0.165962
4.4275e-08	0.0580641	0.062591	0.0107088	0.00975742	0.00976299		4.4275e-08	-0.355928		1.39817	0.200204	0.707183
4.43e-08	0.0647055	0.058262	0.00957098	0.00901206	0.0106383		4.43e-08	-1.37664		-0.00148957	-0.705201	1.83839
4.4325e-08	0.0614797	0.0618695	0.00876782	0.0107738	0.00733908		4.4325e-08	-0.412586		-0.985169	1.50213	-2.33912
4.435e-08	0.0614797	0.0687239	0.0101733	0.0092831	0.00922435		4.435e-08	-0.496253		0.793598	-0.330408	0.0771751
4.4375e-08	0.0614797	0.0598854	0.0115789	0.0100285	0.00929168		4.4375e-08	-0.580101		2.5754	0.616166	0.181003
4.44e-08	0.0700185	0.0671005	0.0103072	0.00846998	0.009561		4.44e-08	0.275951		1.00393	-1.30454	0.542521
4.4425e-08	0.0612899	0.0579012	0.00803159	0.00901206	0.0100323		4.4425e-08	-0.360971		-1.82997	-0.610587	1.16233
4.445e-08	0.0620489	0.0579012	0.00977177	0.0099607	0.00814705		4.445e-08	0.0533624		0.374372	0.591574	-1.22632
4.4475e-08	0.0648952	0.0661986	0.0098387	0.00914758	0.0108403		4.4475e-08	-0.640185		0.479355	-0.403522	2.23267
4.45e-08	0.0582539	0.0620499	0.00963791	0.00968966	0.00949367		4.45e-08	-0.225506		0.24768	0.292791	0.530018
4.4525e-08	0.0593924	0.0620499	0.0107088	0.00853774	0.00733908		4.4525e-08	0.0232527		1.61668	-1.1279	-2.20949
4.455e-08	0.0542691	0.0589835	0.0111104	0.00914758	0.00929168		4.455e-08	-0.00537473		2.14455	-0.346349	0.307899
4.4575e-08	0.0605309	0.0600657	0.00829931	0.0099607	0.00962833		4.4575e-08	-0.145252		-1.37867	0.691021	0.757566
4.46e-08	0.0578744	0.0575404	0.00896861	0.010164	0.00915702		4.46e-08	-0.341011		-0.514617	0.965661	0.171315
4.4625e-08	0.0603412	0.0589835	0.00977177	0.0089443	0.0100996		4.4625e-08	-0.203088		0.520007	-0.544311	1.39954
4.465e-08	0.0574949	0.0598854	0.0104411	0.010164	0.00787773		4.465e-08	-1.235		1.38712	1.00578	-1.43654
4.4675e-08	0.0614797	0.0571797	0.00950405	0.00935086	0.00807972		4.4675e-08	-0.540109		0.22275	0.00416731	-1.16009
4.47e-08	0.0573051	0.0645752	0.00823238	0.0096219	0.0078104		4.47e-08	-1.7971		-1.36754	0.364262	-1.48977
4.4725e-08	0.0555974	0.059705	0.0091694	0.00833446	0.00875303		4.4725e-08	-0.319943		-0.160486	-1.23653	-0.259108
4.475e-08	0.0647055	0.0604265	0.0103072	0.00941862	0.0100323		4.475e-08	1.15939		1.30338	0.147273	1.40733
4.4775e-08	0.0574949	0.061148	0.00796466	0.00901206	0.0100323		4.4775e-08	-0.0433129		-1.6502	-0.345952	1.42616
4.48e-08	0.0569256	0.0579012	0.0091694	0.00914758	0.00976299		4.48e-08	0.878765		-0.10015	-0.156117	1.09732
4.4825e-08	0.0571154	0.0579012	0.00990563	0.0100962	0.00962833		4.4825e-08	-1.67012		0.856502	1.0607	0.941897
4.485e-08	0.0582539	0.0571797	0.00930326	0.00935086	0.00747374		4.485e-08	-0.467714		0.11041	0.138721	-1.82528
4.4875e-08	0.0504741	0.058262	0.00803159	0.00867326	0.0100323		4.4875e-08	1.29732		-1.4899	-0.699095	1.5014
4.49e-08	0.0609104	0.0580816	0.00997256	0.00935086	0.00996499		4.49e-08	-0.751955		1.00446	0.177091	1.43303
4.4925e-08	0.0548384	0.0602461	0.00903554	0.00982518	0.00861837		4.4925e-08	-0.669791		-0.17069	0.797171	-0.293222
4.495e-08	0.0554076	0.0588031	0.00763001	0.00813118	0.00875303		4.495e-08	-0.194052		-1.94645	-1.33088	-0.101161
4.4975e-08	0.0542691	0.0595246	0.00890168	0.0100285	0.00888769		4.4975e-08	-0.167688		-0.301966	1.09453	0.0911739
4.5e-08	0.0567359	0.0589835	0.00957098	0.00989294	0.00767573		4.5e-08	-0.929485		0.574388	0.942336	-1.46527
4.5025e-08	0.0593924	0.0557367	0.00890168	0.00982518	0.00713709		4.5025e-08	0.561161		-0.262415	0.875965	-2.14896
4.505e-08	0.0611002	0.0573601	0.00809852	0.00846998	0.00713709		4.505e-08	-0.93424		-1.27232	-0.828202	-2.13305
4.5075e-08	0.0531306	0.0560974	0.00883475	0.00887654	0.00807972		4.5075e-08	0.727854		-0.308832	-0.292397	-0.889995
4.51e-08	0.0573051	0.0586227	0.0101064	0.00846998	0.00834904		4.51e-08	-0.487397		1.34386	-0.791738	-0.522275
4.5125e-08	0.0542691	0.0573601	0.0101064	0.00819894	0.0100323		4.5125e-08	-2.04357		1.3649	-1.11912	1.68955
4.515e-08	0.0554076	0.0615088	0.00883475	0.00867326	0.00888769		4.515e-08	-0.661489		-0.24991	-0.495856	0.214792
4.5175e-08	0.0546486	0.059705	0.00943712	0.0096219	0.00855104		4.5175e-08	0.326448		0.545287	0.734207	-0.207164
4.52e-08	0.0586334	0.0579012	0.00990563	0.0102995	0.00814705		4.52e-08	0.239746		1.16933	1.6198	-0.717777
4.5225e-08	0.0569256	0.0593442	0.0085001	0.00874102	0.00733908		4.5225e-08	-1.03734		-0.622506	-0.353771	-1.75755
4.525e-08	0.0508536	0.0571797	0.00903554	0.0105028	0.00855104		4.525e-08	0.236012		0.0879233	1.9204	-0.155156
4.5275e-08	0.0485765	0.0514076	0.00789773	0.00935086	0.00942634		4.5275e-08	-1.32684		-1.36215	0.464712	1.00869
4.53e-08	0.0582539	0.0584423	0.00856703	0.0102995	0.00855104		4.53e-08	-0.449475		-0.478168	1.7004	-0.120536
4.5325e-08	0.0512331	0.0584423	0.00957098	0.00982518	0.0107056		4.5325e-08	-2.12892		0.84034	1.11173	2.72332
4.535e-08	0.0542691	0.0575404	0.00689378	0.00880878	0.00774306		4.535e-08	0.11443		-2.60678	-0.174246	-1.14674
4.5375e-08	0.0571154	0.0553759	0.0085001	0.00921534	0.00895502		4.5375e-08	-0.42857		-0.507056	0.366948	0.462113
4.54e-08	0.0561666	0.0535721	0.00829931	0.0089443	0.00733908		4.54e-08	-0.459675		-0.748341	0.0372023	-1.64499
4.5425e-08	0.0599617	0.0539329	0.00870089	0.00697927	0.00915702		4.5425e-08	0.0222673		-0.20787	-2.47437	0.763327
4.545e-08	0.0554076	0.0521291	0.0102403	0.00921534	0.00962833		4.545e-08	1.07547		1.81223	0.423906	1.40194
4.5475e-08	0.0571154	0.0528506	0.00843317	0.00887654	0.00922435		4.5475e-08	-1.41008		-0.517169	0.00594152	0.887921
4.55e-08	0.0548384	0.0589835	0.00829931	0.00772462	0.00821438		4.55e-08	0.672152		-0.672276	-1.46231	-0.426176
4.5525e-08	0.04592	0.061148	0.00876782	0.00901206	0.0100996		4.5525e-08	-0.845286		-0.0428373	0.218266	2.07925
4.555e-08	0.0544589	0.0573601	0.00809852	0.0092831	0.00821438		4.555e-08	0.668144		-0.896166	0.587431	-0.392283
4.5575e-08	0.0504741	0.0535721	0.00836624	0.00880878	0.00767573		4.5575e-08	-1.48161		-0.528021	-0.00730601	-1.08744
4.56e-08	0.0586334	0.0569993	0.00796466	0.00819894	0.00908968		4.56e-08	0.37743		-1.03359	-0.778545	0.799586
4.5625e-08	0.0548384	0.0560974	0.00796466	0.00819894	0.0076084		4.5625e-08	0.346386		-1.01502	-0.760683	-1.14384
4.565e-08	0.0529408	0.0508665	0.0085001	0.00819894	0.00787773		4.565e-08	2.55385		-0.295822	-0.742815	-0.770663
4.5675e-08	0.0574949	0.0533918	0.00930326	0.00874102	0.00801239		4.5675e-08	-0.290449		0.775196	-0.0212326	-0.575499
4.57e-08	0.0470585	0.0541133	0.0091694	0.0082667	0.00841637		4.57e-08	1.17241		0.619826	-0.619011	-0.0226429
4.5725e-08	0.0569256	0.0562778	0.00950405	0.00914758	0.00949367		4.5725e-08	-0.986897		1.07878	0.54433	1.42525
4.575e-08	0.0586334	0.053031	0.00896861	0.010164	0.00875303		4.575e-08	-1.53745		0.39606	1.88588	0.459114
4.5775e-08	0.0586334	0.0478001	0.0091694	0.00806342	0.00828171		4.5775e-08	0.619051		0.679597	-0.829904	-0.150311
4.58e-08	0.0567359	0.050145	0.0098387	0.00867326	0.00942634		4.58e-08	-1.60323		1.57975	-0.0173169	1.39033
4.5825e-08	0.0563564	0.0526703	0.00823238	0.00874102	0.0078104		4.5825e-08	-0.0783195		-0.514079	0.0894042	-0.744222
4.585e-08	0.0578744	0.0550152	0.00829931	0.00799566	0.00882036		4.585e-08	-0.39897		-0.407095	-0.865306	0.618721
4.5875e-08	0.0544589	0.0573601	0.00836624	0.00935086	0.00882036		4.5875e-08	0.551157		-0.299961	0.923011	0.636238
4.59e-08	0.047438	0.0555563	0.00836624	0.00813118	0.0076084		4.59e-08	0.461703		-0.280995	-0.652873	-0.964461
4.5925e-08	0.0580641	0.0533918	0.00870089	0.00752134	0.00747374		4.5925e-08	0.0826952		0.179986	-1.43322	-1.12811
4.595e-08	0.0559769	0.0542936	0.00796466	0.00840222	0.00767573		4.595e-08	-0.181092		-0.773886	-0.262324	-0.84182
4.5975e-08	0.0546486	0.0613284	0.00763001	0.00867326	0.0078104		4.5975e-08	0.366123		-1.1981	0.111037	-0.645226
4.6e-08	0.0508536	0.0528506	0.00763001	0.00772462	0.00733908		4.6e-08	-1.05796		-1.17995	-1.11515	-1.25996
4.6025e-08	0.0516126	0.0490627	0.00776387	0.0082667	0.00888769		4.6025e-08	0.592241		-0.984421	-0.38609	0.831719
4.605e-08	0.0552179	0.0577208	0.00843317	0.00691151	0.00875303		4.605e-08	-0.369126		-0.0783997	-2.149	0.668672
4.6075e-08	0.0571154	0.0553759	0.00803159	0.00819894	0.00861837		4.6075e-08	-0.634366		-0.59252	-0.439464	0.505337
4.61e-08	0.0500946	0.0562778	0.00910247	0.00738582	0.00834904		4.61e-08	-1.36545		0.848838	-1.49188	0.160813
4.6125e-08	0.0555974	0.0546544	0.0085001	0.0086055	0.00807972		4.6125e-08	0.638624		0.0675538	0.13163	-0.184262
4.615e-08	0.0552179	0.053031	0.00957098	0.00921534	0.00841637		4.615e-08	-1.02492		1.51186	0.953801	0.285442
4.6175e-08	0.0491458	0.0604265	0.00863396	0.00738582	0.0078104		4.6175e-08	-0.825197		0.284	-1.44111	-0.513405
4.62e-08	0.0586334	0.0510469	0.00809852	0.0072503	0.00733908		4.62e-08	-1.20872		-0.410588	-1.60311	-1.13203
4.6225e-08	0.0616694	0.051588	0.0085001	0.0092831	0.00841637		4.6225e-08	-0.01624		0.14387	1.10003	0.336775
4.625e-08	0.048956	0.0573601	0.00930326	0.00840222	0.00935901		4.625e-08	-1.2179		1.2355	-0.0460326	1.62606
4.6275e-08	0.0536999	0.0521291	0.0078308	0.0075891	0.00747374		4.6275e-08	-0.0821787		-0.712547	-1.10431	-0.902162
4.63e-08	0.0514228	0.0548348	0.00823238	0.00840222	0.00727175		4.63e-08	-0.759012		-0.157086	-0.0100458	-1.15908
4.6325e-08	0.0569256	0.0474393	0.00856703	0.00752134	0.00794506		4.6325e-08	-0.558374		0.309658	-1.15993	-0.232413
4.635e-08	0.0540794	0.0497842	0.00816545	0.00752134	0.0078104		4.635e-08	-1.41248		-0.209351	-1.14291	-0.398131
4.6375e-08	0.0555974	0.0551955	0.00870089	0.0082667	0.00754107		4.6375e-08	1.13407		0.527338	-0.136115	-0.746561
4.64e-08	0.0540794	0.0519487	0.0085001	0.0082667	0.00767573		4.64e-08	-0.424535		0.277081	-0.118291	-0.54782
4.6425e-08	0.0557871	0.0499646	0.00803159	0.00772462	0.00807972		4.6425e-08	0.1292		-0.333255	-0.821456	0.0166345
4.645e-08	0.0554076	0.0575404	0.00789773	0.00765686	0.00740641		4.645e-08	-1.90287		-0.494719	-0.89439	-0.880884
4.6475e-08	0.0535101	0.0541133	0.00863396	0.00867326	0.00902235		4.6475e-08	-0.231724		0.514308	0.476863	1.33107
4.65e-08	0.0483868	0.0573601	0.00843317	0.00711479	0.00834904		4.65e-08	-0.265449		0.263077	-1.58276	0.433135
4.6525e-08	0.0516126	0.0494235	0.00789773	0.00840222	0.00740641		4.6525e-08	-1.00625		-0.439696	0.151735	-0.832762
4.655e-08	0.0497151	0.0526703	0.00803159	0.00887654	0.00626178		4.655e-08	0.610272		-0.240817	0.803109	-2.37575
4.6575e-08	0.0538896	0.0508665	0.00829931	0.00745358	0.00821438		4.6575e-08	-1.60617		0.139079	-1.08026	0.300564
4.66e-08	0.0499048	0.0505057	0.00729536	0.00853774	0.00821438		4.66e-08	-0.814436		-1.19881	0.386811	0.317399
4.6625e-08	0.0588232	0.058262	0.00903554	0.00738582	0.00801239		4.6625e-08	0.155707		1.17223	-1.13716	0.0584875
4.665e-08	0.0506638	0.051588	0.00635834	0.0086055	0.00733908		4.665e-08	-0.351201		-2.43193	0.513746	-0.844739
4.6675e-08	0.0538896	0.0546544	0.00696071	0.00772462	0.00713709		4.6675e-08	-1.33237		-1.59937	-0.649197	-1.10497
4.67e-08	0.0521818	0.0519487	0.00803159	0.00914758	0.00720442		4.67e-08	-0.715953		-0.130192	1.27751	-0.997099
4.6725e-08	0.0531306	0.0514076	0.00836624	0.00853774	0.00807972		4.6725e-08	0.849666		0.342379	0.477267	0.217275
4.675e-08	0.0516126	0.0505057	0.00662606	0.00907982	0.00814705		4.675e-08	-1.14125		-2.00217	1.22396	0.326264
4.6775e-08	0.0514228	0.0535721	0.00796466	0.00840222	0.00855104		4.6775e-08	-1.05761		-0.165838	0.331151	0.89707
4.68e-08	0.0529408	0.0535721	0.00876782	0.00718255	0.00713709		4.68e-08	-1.03327		0.945114	-1.29292	-1.02631
4.6825e-08	0.0521818	0.050145	0.00756308	0.00779238	0.00828171		4.6825e-08	-0.71169		-0.675974	-0.454687	0.561515
4.685e-08	0.0550281	0.0566386	0.00809852	0.00779238	0.00882036		4.685e-08	-0.211195		0.0715088	-0.437456	1.31879
4.6875e-08	0.0508536	0.0546544	0.00736229	0.0075891	0.00855104		4.6875e-08	-0.126754		-0.914134	-0.694548	0.965767
4.69e-08	0.0529408	0.0479804	0.00876782	0.0072503	0.00814705		4.69e-08	-0.042245		1.02201	-1.1351	0.426807
4.6925e-08	0.0531306	0.0528506	0.00896861	0.00901206	0.00834904		4.6925e-08	-0.494281		1.31555	1.26286	0.721854
4.695e-08	0.0518023	0.0505057	0.00729536	0.00765686	0.00821438		4.695e-08	-0.410018		-0.952759	-0.551798	0.55318
4.6975e-08	0.0559769	0.0562778	0.00769694	0.0072503	0.00855104		4.6975e-08	0.928311		-0.385664	-1.0851	1.03454
4.7e-08	0.0508536	0.0508665	0.00756308	0.00738582	0.00727175		4.7e-08	1.07346		-0.550982	-0.884815	-0.714745
4.7025e-08	0.0493356	0.0528506	0.00809852	0.00867326	0.00841637		4.7025e-08	1.2188		0.200798	0.877767	0.882839
4.705e-08	0.0552179	0.053031	0.00769694	0.00874102	0.0086857		4.705e-08	-1.62799		-0.331687	0.987901	1.27233
4.7075e-08	0.0607207	0.0488823	0.00863396	0.00677599	0.0086857		4.7075e-08	-1.18504		0.972816	-1.66277	1.28963
4.71e-08	0.0546486	0.0577208	0.00977177	0.0072503	0.00787773		4.71e-08	-0.921273		2.55538	-1.00194	0.187845
4.7125e-08	0.0514228	0.0546544	0.00736229	0.00745358	0.00787773		4.7125e-08	-0.477222		-0.738093	-0.708803	0.204291
4.715e-08	0.0478175	0.0521291	0.00776387	0.00819894	0.00754107		4.715e-08	-0.692845		-0.167762	0.322811	-0.246247
4.7175e-08	0.0519921	0.0512272	0.00856703	0.00772462	0.00821438		4.7175e-08	-0.728631		0.956734	-0.305818	0.704554
4.72e-08	0.0455405	0.0494235	0.0085001	0.00650495	0.00693509		4.72e-08	-0.10325		0.88343	-1.95189	-1.05589
4.7225e-08	0.0559769	0.0560974	0.00763001	0.00738582	0.00841637		4.7225e-08	-0.259047		-0.298337	-0.733892	1.01905
4.725e-08	0.048956	0.0512272	0.00742922	0.0082667	0.00666577		4.725e-08	-2.10083		-0.55776	0.486025	-1.39966
4.7275e-08	0.048956	0.0528506	0.00870089	0.00731806	0.00767573		4.7275e-08	0.211831		1.21764	-0.792987	0.0218256
4.73e-08	0.048197	0.0485216	0.00789773	0.00718255	0.00754107		4.73e-08	-1.51179		0.125627	-0.961721	-0.149597
4.7325e-08	0.0478175	0.0472589	0.00662606	0.00819894	0.00680043		4.7325e-08	-1.54852		-1.61694	0.446362	-1.16639
4.735e-08	0.0485765	0.050145	0.00763001	0.00738582	0.00794506		4.735e-08	-0.0757365		-0.209091	-0.65019	0.446356
4.7375e-08	0.0525613	0.0528506	0.00736229	0.00772462	0.00612712		4.7375e-08	-1.56184		-0.562564	-0.168871	-2.07621
4.74e-08	0.0499048	0.0521291	0.00843317	0.00779238	0.00727175		4.74e-08	-0.449819		0.941369	-0.0587812	-0.461749
4.7425e-08	0.048197	0.044914	0.00729536	0.00752134	0.00807972		4.7425e-08	1.32952		-0.620498	-0.413881	0.684243
4.745e-08	0.0502843	0.0458159	0.00742922	0.00799566	0.00787773		4.745e-08	-0.825221		-0.416926	0.255021	0.41815
4.7475e-08	0.0483868	0.0505057	0.00923633	0.00765686	0.00747374		4.7475e-08	-2.49833		2.11531	-0.193658	-0.131347
4.75e-08	0.0500946	0.0514076	0.00896861	0.00650495	0.0078104		4.75e-08	0.0718669		1.76217	-1.76262	0.356665
4.7525e-08	0.0533203	0.0485216	0.00876782	0.0072503	0.00848371		4.7525e-08	-0.389115		1.50168	-0.719816	1.31773
4.755e-08	0.0464893	0.0508665	0.00729536	0.00806342	0.00693509		4.755e-08	-1.33676		-0.533291	0.418053	-0.83965
4.7575e-08	0.0592027	0.0494235	0.00829931	0.00718255	0.00653111		4.7575e-08	-0.0974013		0.885781	-0.780247	-1.39192
4.76e-08	0.0512331	0.0510469	0.00829931	0.00718255	0.0078104		4.76e-08	-2.01968		0.904332	-0.763793	0.422064
4.7625e-08	0.0521818	0.053031	0.00696071	0.00697927	0.00733908		4.7625e-08	0.316789		-0.949137	-1.02834	-0.224894
4.765e-08	0.0542691	0.0532114	0.00722843	0.0096219	0.0078104		4.765e-08	0.402411		-0.55742	2.64384	0.454747
4.7675e-08	0.0519921	0.0521291	0.00776387	0.00846998	0.00747374		4.7675e-08	-0.853268		0.20996	1.06812	-0.00340025
4.77e-08	0.0445917	0.050145	0.00843317	0.00657271	0.00666577		4.77e-08	0.878976		1.16627	-1.54296	-1.12707
4.7725e-08	0.0504741	0.0505057	0.00829931	0.00711479	0.00747374		4.7725e-08	-0.378297		0.997184	-0.77541	0.0286131
4.775e-08	0.0523716	0.0514076	0.00816545	0.00670823	0.00700242		4.775e-08	-0.170876		0.827775	-1.32327	-0.621203
4.7775e-08	0.0493356	0.0499646	0.00722843	0.00846998	0.00693509		4.7775e-08	1.44336		-0.470807	1.13973	-0.700908
4.78e-08	0.0514228	0.0492431	0.00709457	0.00948638	0.0076084		4.78e-08	1.77481		-0.641821	2.57049	0.267103
4.7825e-08	0.048956	0.0532114	0.00829931	0.00765686	0.00720442		4.7825e-08	-0.710532		1.07136	0.0442306	-0.288791
4.785e-08	0.0472483	0.0467178	0.00655913	0.0082667	0.00693509		4.785e-08	0.293932		-1.36205	0.910263	-0.654746
4.7875e-08	0.0470585	0.0496038	0.00722843	0.00718255	0.00767573		4.7875e-08	-2.13498		-0.401744	-0.582809	0.410894
4.79e-08	0.0468688	0.053031	0.00696071	0.00731806	0.00774306		4.79e-08	-0.823277		-0.762325	-0.377397	0.522628
4.7925e-08	0.0483868	0.0459963	0.00642527	0.00779238	0.00686776		4.7925e-08	-0.246801		-1.50169	0.301173	-0.704204
4.795e-08	0.0438327	0.0510469	0.00856703	0.00772462	0.0078104		4.795e-08	-1.69812		1.54245	0.223653	0.650866
4.7975e-08	0.0485765	0.0476197	0.00729536	0.00752134	0.00754107		4.7975e-08	-0.629365		-0.237938	-0.0434559	0.284146
4.8e-08	0.0464893	0.044914	0.00629141	0.00630167	0.00733908		4.8e-08	-1.8985		-1.64223	-1.73296	0.0126798
4.8025e-08	0.0525613	0.0490627	0.0078308	0.00813118	0.00807972		4.8025e-08	0.958366		0.555588	0.844005	1.08355
4.805e-08	0.0480073	0.0436514	0.00763001	0.00677599	0.00828171		4.805e-08	-1.97624		0.288731	-1.03747	1.38812
4.8075e-08	0.048956	0.0492431	0.00689378	0.00697927	0.00801239		4.8075e-08	0.761378		-0.738713	-0.736471	1.0207
4.81e-08	0.0536999	0.0512272	0.00776387	0.00711479	0.00659844		4.81e-08	-1.99257		0.514285	-0.530118	-0.981538
4.8125e-08	0.048956	0.0483412	0.0064922	0.0082667	0.00612712		4.8125e-08	-1.04301		-1.2761	1.10415	-1.63997
4.815e-08	0.0491458	0.043471	0.00789773	0.00745358	0.00700242		4.815e-08	-0.0920886		0.740473	-0.0212475	-0.37388
4.8175e-08	0.0508536	0.0422084	0.0085001	0.00691151	0.00680043		4.8175e-08	-1.80092		1.61644	-0.767148	-0.647482
4.82e-08	0.0476278	0.0496038	0.00749615	0.00806342	0.00653111		4.82e-08	-1.3447		0.204079	0.870784	-1.01794
4.8225e-08	0.0480073	0.054474	0.00789773	0.00711479	0.00754107		4.8225e-08	-0.392003		0.794549	-0.448502	0.444452
4.825e-08	0.0447815	0.0413065	0.00769694	0.00670823	0.00821438		4.825e-08	-1.17461		0.525874	-1.0055	1.42618
4.8275e-08	0.048197	0.0488823	0.00709457	0.0089443	0.00706975		4.8275e-08	0.152019		-0.317158	2.16614	-0.19998
4.83e-08	0.04592	0.0459963	0.00776387	0.0075891	0.00666577		4.83e-08	-1.19044		0.657104	0.270373	-0.764773
4.8325e-08	0.044402	0.0481608	0.00669299	0.0075891	0.00767573		4.8325e-08	-1.35382		-0.857927	0.287184	0.702105
4.835e-08	0.043643	0.0422084	0.00749615	0.00745358	0.00774306		4.835e-08	-1.57969		0.309183	0.112274	0.815107
4.8375e-08	0.0461098	0.0456355	0.0064922	0.00799566	0.00774306		4.8375e-08	0.0617468		-1.11275	0.896401	0.831324
4.84e-08	0.044402	0.0479804	0.00756308	0.00684375	0.00693509		4.84e-08	-0.350416		0.440195	-0.718504	-0.316552
4.8425e-08	0.045161	0.0478001	0.00722843	0.00806342	0.00605979		4.8425e-08	-0.700895		-0.0228218	1.02704	-1.56326
4.845e-08	0.043643	0.0523095	0.00709457	0.00745358	0.00740641		4.845e-08	-0.552774		-0.198028	0.178943	0.394249
4.8475e-08	0.0472483	0.0443729	0.00763001	0.00670823	0.00720442		4.8475e-08	-0.404465		0.589236	-0.863008	0.118444
4.85e-08	0.0480073	0.0472589	0.00742922	0.00779238	0.00666577		4.85e-08	-1.38075		0.317822	0.693886	-0.644321
4.8525e-08	0.0390889	0.0510469	0.00562211	0.00745358	0.00801239		4.8525e-08	-0.482462		-2.2686	0.228966	1.31825
4.855e-08	0.0462995	0.0454551	0.00709457	0.00738582	0.00639644		4.855e-08	0.604889		-0.129977	0.149139	-1.00403
4.8575e-08	0.043643	0.0474393	0.00662606	0.00684375	0.00646378		4.8575e-08	-0.435519		-0.789187	-0.606674	-0.891772
4.86e-08	0.048197	0.0472589	0.00662606	0.00786014	0.00733908		4.86e-08	0.214702		-0.772782	0.858593	0.391785
4.8625e-08	0.0510433	0.043471	0.00836624	0.00867326	0.00680043		4.8625e-08	0.677678		1.75929	2.03606	-0.373818
4.865e-08	0.047438	0.0445533	0.00729536	0.0075891	0.00774306		4.865e-08	0.450839		0.228394	0.505665	1.00978
4.8675e-08	0.0426942	0.050145	0.00729536	0.00650495	0.00720442		4.8675e-08	0.160796		0.245613	-1.02718	0.243451
4.87e-08	0.047438	0.0492431	0.00789773	0.00752134	0.00720442		4.87e-08	1.44182		1.1358	0.442336	0.259089
4.8725e-08	0.0434532	0.0476197	0.00776387	0.00738582	0.0067331		4.8725e-08	-1.61596		0.959604	0.265055	-0.411032
4.875e-08	0.0453508	0.0517684	0.00836624	0.00765686	0.00632911		4.875e-08	-0.838054		1.85179	0.669957	-0.984154
4.8775e-08	0.0487663	0.0485216	0.00642527	0.00609839	0.00659844		4.8775e-08	1.07503		-0.949575	-1.54787	-0.577037
4.88e-08	0.0417455	0.0496038	0.00709457	0.00697927	0.00626178		4.88e-08	-0.2876		0.0397273	-0.268709	-1.05304
4.8825e-08	0.042884	0.0519487	0.00675992	0.00711479	0.00733908		4.8825e-08	-0.516559		-0.430328	-0.0580207	0.53372
4.885e-08	0.044402	0.0514076	0.00742922	0.00562407	0.00706975		4.885e-08	-0.114468		0.560953	-2.18442	0.156116
4.8875e-08	0.0462995	0.0456355	0.0071615	0.00670823	0.00727175		4.8875e-08	-1.86029		0.188047	-0.610413	0.466794
4.89e-08	0.0504741	0.0427495	0.00689378	0.00677599	0.00666577		4.89e-08	-0.573383		-0.185493	-0.497116	-0.403892
4.8925e-08	0.048956	0.0461767	0.00682685	0.00772462	0.00686776		4.8925e-08	0.335684		-0.266515	0.88544	-0.093199
4.895e-08	0.046679	0.0443729	0.00609062	0.0079279	0.0067331		4.895e-08	-2.55381		-1.32566	1.19547	-0.275218
4.8975e-08	0.0470585	0.0447336	0.00769694	0.00562407	0.00659844		4.8975e-08	-0.377369		1.03915	-2.11179	-0.457531
4.9e-08	0.044402	0.0490627	0.00763001	0.00650495	0.00579047		4.9e-08	-1.49584		0.958849	-0.825153	-1.62797
4.9025e-08	0.0411762	0.0445533	0.00722843	0.00738582	0.00720442		4.9025e-08	-1.28306		0.388179	0.463484	0.462066
4.905e-08	0.04592	0.0414868	0.00816545	0.00657271	0.0058578		4.905e-08	1.02616		1.77891	-0.696126	-1.50097
4.9075e-08	0.0400377	0.0411261	0.00729536	0.00745358	0.00619445		4.9075e-08	-0.665927		0.520483	0.59457	-0.991851
4.91e-08	0.0453508	0.0450944	0.00829931	0.00779238	0.00632911		4.91e-08	0.0567769		2.01181	1.10196	-0.779232
4.9125e-08	0.0455405	0.044914	0.00702764	0.00643719	0.00612712		4.9125e-08	-1.63865		0.161276	-0.845932	-1.06209
4.915e-08	0.04592	0.0436514	0.00763001	0.00650495	0.00848371		4.915e-08	-3.59149		1.06405	-0.732203	2.42534
4.9175e-08	0.0453508	0.0505057	0.00675992	0.00677599	0.00814705		4.9175e-08	-0.127955		-0.199197	-0.323118	1.94584
4.92e-08	0.048197	0.046357	0.0071615	0.00697927	0.0058578		4.92e-08	-0.296148		0.408922	-0.0118764	-1.41641
4.9225e-08	0.0455405	0.0436514	0.00702764	0.00596287	0.00774306		4.9225e-08	-2.69943		0.228539	-1.47412	1.38242
4.925e-08	0.0445917	0.0422084	0.00555518	0.00670823	0.00686776		4.925e-08	0.772406		-1.92748	-0.374304	0.104739
4.9275e-08	0.0512331	0.044914	0.00722843	0.00697927	0.00659844		4.9275e-08	-1.56976		0.558689	0.0362486	-0.278464
4.93e-08	0.0478175	0.051588	0.00756308	0.00786014	0.00646378		4.93e-08	0.180212		1.07035	1.33649	-0.462922
4.9325e-08	0.0426942	0.0445533	0.00756308	0.00684375	0.0067331		4.9325e-08	-0.564876		1.08775	-0.129473	-0.049164
4.935e-08	0.0438327	0.0472589	0.00809852	0.00616615	0.00579047		4.935e-08	-0.413855		1.89787	-1.10306	-1.43174
4.9375e-08	0.0483868	0.0467178	0.00756308	0.00670823	0.00653111		4.9375e-08	0.699403		1.12256	-0.295842	-0.318806
4.94e-08	0.042125	0.0483412	0.00655913	0.00657271	0.00700242		4.94e-08	-0.303845		-0.348799	-0.478353	0.395869
4.9425e-08	0.0472483	0.0481608	0.0064922	0.00731806	0.00693509		4.9425e-08	-1.11594		-0.431928	0.628135	0.311168
4.945e-08	0.0476278	0.0436514	0.00622448	0.00731806	0.00767573		4.945e-08	0.706229		-0.813453	0.644545	1.42789
4.9475e-08	0.0510433	0.0404046	0.00776387	0.00596287	0.00720442		4.9475e-08	0.60122		1.49075	-1.32572	0.742569
4.95e-08	0.0455405	0.0458159	0.00682685	0.00697927	0.00740641		4.95e-08	-2.27215		0.114341	0.180305	1.059
4.9525e-08	0.0491458	0.0436514	0.00655913	0.00731806	0.00632911		4.9525e-08	-0.189152		-0.26778	0.693756	-0.530907
4.955e-08	0.0426942	0.0389616	0.00662606	0.00643719	0.00794506		4.955e-08	1.05879		-0.151874	-0.584266	1.89405
4.9575e-08	0.0409865	0.0467178	0.00756308	0.00745358	0.00706975		4.9575e-08	-0.465798		1.26185	0.925783	0.603826
4.96e-08	0.0453508	0.0438318	0.00803159	0.00799566	0.00807972		4.96e-08	-0.507627		1.97854	1.7401	2.12797
4.9625e-08	0.0438327	0.0443729	0.0071615	0.0075891	0.00599246		4.9625e-08	0.0965963		0.696683	1.15841	-0.975924
4.965e-08	0.045161	0.0478001	0.00682685	0.00664047	0.00794506		4.965e-08	-0.720951		0.213241	-0.223265	1.95957
4.9675e-08	0.0445917	0.0402242	0.00682685	0.00636943	0.00700242		4.9675e-08	-1.08678		0.229728	-0.607523	0.564622
4.97e-08	0.0464893	0.0443729	0.00689378	0.00623391	0.00680043		4.97e-08	-0.0284514		0.346454	-0.792322	0.277311
4.9725e-08	0.0425045	0.0432906	0.00548825	0.00623391	0.00518449		4.9725e-08	-0.78323		-1.7435	-0.777197	-2.13065
4.975e-08	0.0432635	0.0440121	0.00742922	0.00711479	0.00727175		4.975e-08	-2.05801		1.18275	0.540492	1.01482
4.9775e-08	0.048956	0.046357	0.00602369	0.00657271	0.00612712		4.9775e-08	-1.51736		-0.910015	-0.245593	-0.688483
4.98e-08	0.0394684	0.0470785	0.00702764	0.00650495	0.00720442		4.98e-08	-0.521249		0.613804	-0.330469	0.944885
4.9825e-08	0.04592	0.0503253	0.00736229	0.00650495	0.00632911		4.9825e-08	0.346319		1.13368	-0.315081	-0.356034
4.985e-08	0.0390889	0.0384204	0.00588983	0.00575959	0.00632911		4.985e-08	0.109287		-1.06508	-1.40534	-0.34149
4.9875e-08	0.0455405	0.0378793	0.00736229	0.00582735	0.00552114		4.9875e-08	0.457742		1.16785	-1.29024	-1.54396
4.99e-08	0.040607	0.0436514	0.00696071	0.00664047	0.00572313		4.99e-08	0.41578		0.579638	-0.0675859	-1.22584
[truncated: 6,002 more rows]

## Sheet: Figure 6 - C_D
C							D
TCSPC							TCSPC
resting		active					0uM	0.5uM	320uM
average dist, r, resting	standarad deviation, sig, resting	average dist, r, active	standard deviation, sig, active				0.283798	0.596775	1
39.3024	4.18092	30.4766	2.87602				0.299234	0.64022	1
38.2054	4.95836	31.102	2.86468				0.322985	0.644232	1
39.7547	3.29187	32.1083	2.01723				0.324215	0.668679	1
39.7076	3.29772	32.0173	2.04425				0.332076	0.684852	0.99719
40.5219	4.11764	30.7017	2.79568				0.416325	0.701685	0.99438
40.338	4.34166	30.7279	2.68274				0.422914	0.722764	0.99438
40.1173	4.1626	30.3519	3.33548				0.46597	0.761054	0.99438
40.1189	4.0956	30.2845	3.28296

## Sheet: Figure 6 - E
Distance	Apo 1	Apo 2	Apo 3	Apo 4	Apo 5	Apo 6	Apo 7	Apo 8	0.5uM cAMP 1	0.5uM cAMP 2	0.5uM cAMP 3	0.5uM cAMP 4	0.5uM cAMP 5	0.5uM cAMP 6	0.5uM cAMP 7	0.5uM cAMP 8	320uM cAMP 1	320uM cAMP 2	320uM cAMP 3	320uM cAMP 4	320uM cAMP 5	320uM cAMP 6	320uM cAMP 7	320uM cAMP 8		Avg Apo	Avg 0.5uM cAMP	Avg 320uM cAMP
0	1.18558e-20	6.33821e-23	2.69426e-33	1.7517e-33	6.88695e-15	3.29927e-21	1.68971e-20	5.32433e-20	5.8893e-21	2.99674e-23	1.60468e-33	9.32587e-34	3.24948e-15	1.84303e-21	2.92297e-20	9.52948e-20	4.83206e-30	9.25367e-28	0	0	3.52776e-27	1.3895e-22	4.03871e-20	1.2501e-19		8.57468e-23	4.30989e-23	3.75623e-25
0.392157	1.81696e-20	1.02105e-22	5.58198e-33	3.64176e-33	9.3897e-15	5.16673e-21	2.95733e-20	9.1666e-20	9.0256e-21	4.82759e-23	3.32459e-33	1.93883e-33	4.43036e-15	2.88624e-21	5.11725e-20	1.64134e-19	1.1318e-29	2.02487e-27	0	0	7.50987e-27	2.17627e-22	7.07133e-20	2.15343e-19		1.38876e-22	6.98032e-23	6.08376e-25
0.784314	2.77866e-20	1.64097e-22	1.15223e-32	7.54326e-33	1.27812e-14	8.07274e-21	5.15695e-20	1.57258e-19	1.38028e-20	7.75869e-23	6.8626e-33	4.01595e-33	6.03056e-15	4.50963e-21	8.92567e-20	2.81689e-19	2.63629e-29	4.40816e-27	0	0	1.59092e-26	3.4009e-22	1.23352e-19	3.69618e-19		2.24378e-22	1.12779e-22	9.82971e-25
1.17647	4.24037e-20	2.63106e-22	2.3697e-32	1.5567e-32	1.73693e-14	1.25844e-20	8.95959e-20	2.68828e-19	2.10638e-20	1.24401e-22	1.41137e-32	8.28768e-33	8.19539e-15	7.03e-21	1.55109e-19	4.81709e-19	6.10666e-29	9.54763e-27	0	0	3.35389e-26	5.30278e-22	2.14379e-19	6.32141e-19		3.61641e-22	1.81772e-22	1.58438e-24
1.56863	6.45731e-20	4.20858e-22	4.85567e-32	3.2007e-32	2.35661e-14	1.95727e-20	1.5509e-19	4.57925e-19	3.20762e-20	1.98992e-22	2.892e-32	1.70402e-32	1.11192e-14	1.0934e-20	2.6855e-19	8.2081e-19	1.40669e-28	2.05736e-26	0	0	7.0361e-26	8.24993e-22	3.71197e-19	1.07724e-18		5.81458e-22	2.92258e-22	2.54759e-24
1.96078	9.81246e-20	6.71611e-22	9.91307e-32	6.55668e-32	3.19217e-14	3.03722e-20	2.67473e-19	7.77264e-19	4.87427e-20	3.17559e-22	5.90415e-32	3.4907e-32	1.50617e-14	1.69672e-20	4.63238e-19	1.39362e-18	3.22242e-28	4.41066e-26	0	0	1.46892e-25	1.28069e-21	6.40348e-19	1.82916e-18		9.32617e-22	4.68762e-22	4.08653e-24
2.35294	1.48793e-19	1.06924e-21	2.01637e-31	1.3382e-31	4.31697e-14	4.70229e-20	4.59593e-19	1.3146e-18	7.39118e-20	5.05585e-22	1.20093e-31	7.1244e-32	2.03688e-14	2.62694e-20	7.96114e-19	2.35768e-18	7.34093e-28	9.40748e-26	0	0	3.05174e-25	1.98379e-21	1.10056e-18	3.09477e-18		1.49222e-21	7.50035e-22	6.53942e-24
2.7451	2.25146e-19	1.69828e-21	4.08633e-31	2.72115e-31	5.8286e-14	7.26356e-20	7.86802e-19	2.21551e-18	1.1184e-19	8.0305e-22	2.43379e-31	1.44871e-31	2.75012e-14	4.05789e-20	1.36313e-18	3.97438e-18	1.66305e-27	1.99628e-25	0	0	6.30929e-25	3.06634e-21	1.88453e-18	5.21728e-18		2.3818e-21	1.19717e-21	1.04397e-23
3.13725	3.39959e-19	2.69104e-21	8.25088e-31	5.51291e-31	7.85675e-14	1.11943e-19	1.342e-18	3.72051e-18	1.68872e-19	1.27254e-21	4.91416e-31	2.93501e-31	3.70707e-14	6.25405e-20	2.32535e-18	6.67566e-18	3.74669e-27	4.21449e-25	0	0	1.29806e-24	4.72975e-21	3.21498e-18	8.76391e-18		3.79247e-21	1.90622e-21	1.66268e-23
3.52941	5.12231e-19	4.25411e-21	1.65985e-30	1.11277e-30	1.05734e-13	1.72129e-19	2.28054e-18	6.2256e-18	2.54447e-19	2.0118e-21	9.88596e-31	5.92428e-31	4.98888e-14	9.61688e-20	3.95212e-18	1.11728e-17	8.39412e-27	8.85212e-25	0	0	2.65763e-24	7.28067e-21	5.46439e-18	1.46687e-17		6.02398e-21	3.02785e-21	2.64188e-23
3.92157	7.70165e-19	6.70926e-21	3.32691e-30	2.23785e-30	1.42063e-13	2.6407e-19	3.86115e-18	1.03803e-17	3.82574e-19	3.1731e-21	1.98148e-30	1.1914e-30	6.70299e-14	1.47544e-19	6.69209e-18	1.86323e-17	1.8702e-26	1.84981e-24	0	0	5.41473e-24	1.11854e-20	9.25324e-18	2.44637e-17		9.54527e-21	4.79777e-21	4.18804e-23
4.31373	1.15553e-18	1.05565e-20	6.64379e-30	4.48384e-30	1.90564e-13	4.04199e-19	6.51314e-18	1.72457e-17	5.74e-19	4.9931e-21	3.95699e-30	2.38714e-30	8.99141e-14	2.25852e-19	1.12897e-17	3.0961e-17	4.14371e-26	3.84577e-24	0	0	1.09785e-23	1.7152e-20	1.56111e-17	4.06528e-17		1.50882e-20	7.58385e-21	6.62404e-23
4.70588	1.73004e-18	1.65707e-20	1.32188e-29	8.9509e-30	2.55207e-13	6.17278e-19	1.09461e-17	2.85498e-17	8.59384e-19	7.83878e-21	7.87303e-30	4.76536e-30	1.20415e-13	3.44942e-19	1.89756e-17	5.12628e-17	9.13011e-26	7.95458e-24	0	0	2.21508e-23	2.6255e-20	2.62399e-17	6.7313e-17		2.3792e-20	1.19587e-20	1.04537e-22
5.09804	2.58469e-18	2.59504e-20	2.62043e-29	1.78025e-29	3.41223e-13	9.40544e-19	1.83281e-17	4.70943e-17	1.28393e-18	1.22779e-20	1.56071e-29	9.47784e-30	1.61e-13	5.25641e-19	3.17758e-17	8.45728e-17	2.00055e-25	1.63693e-23	0	0	4.44756e-23	4.01236e-20	4.39419e-17	1.11057e-16		3.74255e-20	1.88115e-20	1.64621e-22
5.4902	3.85337e-18	4.05441e-20	5.17552e-29	3.5277e-29	4.55489e-13	1.42985e-18	3.05754e-17	7.74069e-17	1.91413e-18	1.91868e-20	3.0825e-29	1.8781e-29	2.14914e-13	7.99206e-19	5.30136e-17	1.39027e-16	4.35921e-25	3.35133e-23	1.4013e-45	0	8.88661e-23	6.12282e-20	7.33134e-17	1.82571e-16		5.87285e-20	2.95194e-20	2.58707e-22
5.88235	5.73259e-18	6.31966e-20	1.01845e-28	6.96464e-29	6.07031e-13	2.1688e-18	5.0818e-17	1.26776e-16	2.84762e-18	2.99152e-20	6.0658e-29	3.70789e-29	2.86417e-13	1.21244e-18	8.81185e-17	2.27723e-16	9.44611e-25	6.82627e-23	2.8026e-45	0	1.76699e-22	9.33163e-20	1.21864e-16	2.99057e-16		9.19336e-20	4.62101e-20	4.05781e-22
6.27451	8.5102e-18	9.82756e-20	1.99676e-28	1.36995e-28	8.07676e-13	3.28219e-18	8.41503e-17	2.06888e-16	4.22738e-18	4.65374e-20	1.18926e-28	7.29343e-29	3.81088e-13	1.83526e-18	1.45927e-16	3.71668e-16	2.03556e-24	1.38333e-22	1.4013e-44	0	3.49635e-22	1.42078e-19	2.01817e-16	4.88109e-16		1.43564e-19	7.21626e-20	6.35339e-22
6.66667	1.26069e-17	1.5247e-19	3.90046e-28	2.68475e-28	1.07289e-12	4.95598e-18	1.38831e-16	3.36418e-16	6.26237e-18	7.22347e-20	2.32309e-28	1.42933e-28	5.06226e-13	2.77193e-18	2.40766e-16	6.04425e-16	4.36217e-24	2.789e-22	5.46506e-44	1.4013e-45	6.8846e-22	2.16168e-19	3.32987e-16	7.93812e-16		2.23645e-19	1.12417e-19	9.93207e-22
7.05882	1.8636e-17	2.36002e-19	7.59117e-28	5.24207e-28	1.42289e-12	7.46656e-18	2.28195e-16	5.45086e-16	9.25729e-18	1.11876e-19	4.52124e-28	2.79082e-28	6.71363e-13	4.17756e-18	3.95769e-16	9.79421e-16	9.29622e-24	5.59431e-22	2.12997e-43	8.40779e-45	1.34904e-21	3.28785e-19	5.47374e-16	1.28634e-15		3.47551e-19	1.74703e-19	1.55063e-21
7.45098	2.74901e-17	3.64453e-19	1.47199e-27	1.01976e-27	1.88398e-12	1.12238e-17	3.73696e-16	8.80024e-16	1.36555e-17	1.72901e-19	8.76704e-28	5.42908e-28	8.88922e-13	6.28246e-18	6.48155e-16	1.58138e-15	1.97014e-23	1.11641e-21	8.26766e-43	3.36312e-44	2.63061e-21	5.00121e-19	8.96458e-16	2.07699e-15		5.38794e-19	2.70843e-19	2.41858e-21
7.84314	4.04649e-17	5.61522e-19	2.84382e-27	1.97647e-27	2.49044e-12	1.68343e-17	6.09706e-16	1.41568e-15	2.01007e-17	2.66655e-19	1.69375e-27	1.05225e-27	1.17507e-12	9.42799e-18	1.05756e-15	2.54415e-15	4.15215e-23	2.21654e-21	3.17394e-42	1.35926e-43	5.10469e-21	7.61205e-19	1.46273e-15	3.34158e-15		8.33244e-19	4.18873e-19	3.77035e-21
8.23529	5.94373e-17	8.63177e-19	5.47396e-27	3.81662e-27	3.28677e-12	2.51936e-17	9.91092e-16	2.26923e-15	2.95251e-17	4.10417e-19	3.26025e-27	2.03192e-27	1.5508e-12	1.41192e-17	1.71917e-15	4.07838e-15	8.70234e-23	4.3783e-21	1.20764e-41	5.40901e-43	9.85748e-21	1.15997e-18	2.37786e-15	5.35681e-15		1.28549e-18	6.46247e-19	5.87765e-21
8.62745	8.71201e-17	1.32388e-18	1.04979e-26	7.34285e-27	4.33068e-12	3.76214e-17	1.60508e-15	3.62438e-15	4.32764e-17	6.30462e-19	6.2525e-27	3.90925e-27	2.04335e-12	2.11019e-17	2.78433e-15	6.51437e-15	1.81378e-22	8.60425e-21	4.5503e-41	2.11876e-42	1.89429e-20	1.7709e-18	3.8512e-15	8.55657e-15		1.97838e-18	9.94642e-19	9.16886e-21
9.01961	1.27425e-16	2.02591e-18	2.0059e-26	1.4075e-26	5.69687e-12	5.60583e-17	2.58983e-15	5.76807e-15	6.32979e-17	9.66714e-19	1.1947e-26	7.49336e-27	2.68796e-12	3.14763e-17	4.49276e-15	1.0368e-14	3.75942e-22	1.68228e-20	1.69818e-40	8.23123e-42	3.6225e-20	2.7106e-18	6.21433e-15	1.36186e-14		3.03737e-18	1.52718e-18	1.43241e-20
9.41176	1.85983e-16	3.09335e-18	3.81872e-26	2.68799e-26	7.48186e-12	8.33522e-17	4.16328e-15	9.14679e-15	9.23859e-17	1.47978e-18	2.2744e-26	1.43105e-26	3.53018e-12	4.68627e-17	7.2226e-15	1.64422e-14	7.74894e-22	3.27235e-20	6.27726e-40	3.16623e-41	6.89374e-20	4.16292e-18	9.99036e-15	2.15975e-14		4.65194e-18	2.33923e-18	2.24323e-20
9.80392	2.70874e-16	4.71291e-18	7.24316e-26	5.11451e-26	9.81017e-12	1.23675e-16	6.66791e-15	1.44526e-14	1.34555e-16	2.26164e-18	4.31397e-26	2.72291e-26	4.62875e-12	6.96451e-17	1.15681e-14	2.59813e-14	1.58837e-21	6.33286e-20	2.29825e-39	1.2059e-40	1.30552e-19	6.42018e-18	1.60013e-14	3.41281e-14		7.10753e-18	3.57452e-18	3.5255e-20
10.1961	3.93677e-16	7.16506e-18	1.3688e-25	9.69566e-26	1.28421e-11	1.83125e-16	1.06398e-14	2.27545e-14	1.95558e-16	3.45191e-18	8.1525e-26	5.16186e-26	6.05932e-12	1.03329e-16	1.84595e-14	4.09075e-14	3.23776e-21	1.21932e-19	8.33431e-39	4.54793e-40	2.46035e-19	9.95098e-18	2.5534e-14	5.37353e-14		1.08331e-17	5.44917e-18	5.56745e-20
10.5882	5.70941e-16	1.08703e-17	2.57725e-25	1.83125e-25	1.67838e-11	2.70609e-16	1.69148e-14	3.56966e-14	2.83614e-16	5.26261e-18	1.53499e-25	9.74937e-26	7.91914e-12	1.53063e-16	2.93472e-14	6.41775e-14	6.56335e-21	2.33567e-19	2.99353e-38	1.69844e-39	4.61415e-19	1.55127e-17	4.05948e-14	8.43036e-14		1.64718e-17	8.28739e-18	8.84651e-20
10.9804	8.2627e-16	1.64583e-17	4.83477e-25	3.446e-25	2.18997e-11	3.99103e-16	2.6791e-14	5.57991e-14	4.1045e-16	8.01612e-18	2.87955e-25	1.83461e-25	1.0333e-11	2.26416e-16	4.64838e-14	1.00323e-13	1.3231e-20	4.45126e-19	1.06498e-37	6.28082e-39	8.61133e-19	2.43392e-17	6.42998e-14	1.31786e-13		2.49853e-17	1.25744e-17	1.41639e-19
11.3725	1.19325e-15	2.48701e-17	9.03642e-25	6.4607e-25	2.85284e-11	5.87503e-16	4.22767e-14	8.69097e-14	5.92751e-16	1.22035e-17	5.38202e-25	3.4396e-25	1.34606e-11	3.34508e-16	7.33541e-14	1.56265e-13	2.65244e-20	8.4398e-19	3.75269e-37	2.29992e-38	1.59931e-18	3.84546e-17	1.0147e-13	2.05274e-13		3.7808e-17	1.9035e-17	2.28812e-19
11.7647	1.71956e-15	3.75113e-17	1.68275e-24	1.20681e-24	3.71032e-11	8.63279e-16	6.64664e-14	1.3488e-13	8.54208e-16	1.85746e-17	1.00223e-24	6.42494e-25	1.75065e-11	4.93691e-16	1.15328e-13	2.42526e-13	5.28792e-20	1.59206e-18	1.30974e-36	8.33953e-38	2.95581e-18	6.12017e-17	1.59534e-13	3.18593e-13		5.70747e-17	2.87491e-17	3.73413e-19
12.1569	2.47278e-15	5.64783e-17	3.12209e-24	2.24594e-24	4.81769e-11	1.26634e-15	1.0411e-13	2.08579e-13	1.22839e-15	2.8278e-17	1.8595e-24	1.19571e-24	2.27314e-11	7.28042e-16	1.80649e-13	3.75054e-13	1.04836e-19	2.98788e-18	4.52765e-36	2.99434e-37	5.43632e-18	9.81298e-17	2.49895e-13	4.92693e-13		8.59545e-17	4.3323e-17	6.16192e-19
12.549	3.54838e-15	8.48969e-17	5.77131e-24	4.16441e-24	6.2454e-11	1.85462e-15	1.6247e-13	3.21389e-13	1.76274e-15	4.30803e-17	3.43735e-24	2.21708e-24	2.94678e-11	1.07306e-15	2.8192e-13	5.77921e-13	2.06691e-19	5.57884e-18	1.55025e-35	1.06461e-36	9.94984e-18	1.58492e-16	3.89986e-13	7.59199e-13		1.29141e-16	6.51415e-17	1.02872e-18
12.9412	5.08106e-15	1.27426e-16	1.06293e-23	7.69317e-24	8.08303e-11	2.71221e-15	2.52605e-13	4.93437e-13	2.52418e-15	6.57104e-17	6.33075e-24	4.09576e-24	3.81383e-11	1.58123e-15	4.38332e-13	8.87324e-13	4.05248e-19	1.03634e-17	5.25745e-35	3.74811e-36	1.81222e-17	2.57767e-16	6.06359e-13	1.16566e-12		1.9357e-16	9.77385e-17	1.73767e-18
13.3333	7.26036e-15	1.9101e-16	1.95047e-23	1.41597e-23	1.04444e-10	3.96114e-15	3.91291e-13	7.5487e-13	3.60693e-15	1.00407e-16	1.16169e-23	7.53847e-24	4.92798e-11	2.3303e-15	6.78998e-13	1.35748e-12	7.90141e-19	1.91531e-17	1.766e-34	1.30666e-35	3.28464e-17	4.21906e-16	9.39287e-13	1.78332e-12		2.89466e-16	1.46344e-16	2.96864e-18
13.7255	1.03524e-14	2.86004e-16	3.56596e-23	2.59657e-23	1.34736e-10	5.77855e-15	6.03874e-13	1.15067e-12	5.14326e-15	1.53788e-16	2.12386e-23	1.38238e-23	6.35726e-11	3.43587e-15	1.04791e-12	2.06931e-12	1.53206e-18	3.52169e-17	5.87557e-34	4.51073e-35	5.92445e-17	6.94469e-16	1.44962e-12	2.71847e-12		4.31869e-16	2.18686e-16	5.12505e-18
14.1176	1.47301e-14	4.27865e-16	6.49554e-23	4.74398e-23	1.73531e-10	8.42182e-15	9.285e-13	1.74772e-12	7.31855e-15	2.36258e-16	3.86869e-23	2.52564e-23	8.18775e-11	5.0704e-15	1.61126e-12	3.14309e-12	2.95415e-18	6.44232e-17	1.93621e-33	1.54192e-34	1.06339e-16	1.14859e-15	2.22895e-12	4.12912e-12		6.42861e-16	3.26175e-16	8.93036e-18
14.5098	2.09146e-14	6.39698e-16	1.17884e-22	8.63539e-23	2.23133e-10	1.22652e-14	1.42235e-12	2.64503e-12	1.0392e-14	3.64262e-16	7.02111e-23	4.59738e-23	1.05282e-10	7.49228e-15	2.46829e-12	4.75691e-12	5.66468e-18	1.17249e-16	6.31971e-33	5.21922e-34	1.89941e-16	1.90701e-15	3.41455e-12	6.24927e-12		9.54785e-16	4.85649e-16	1.56835e-17
14.902	2.96329e-14	9.56106e-16	2.13158e-22	1.5661e-22	2.86448e-10	1.78539e-14	2.1708e-12	3.98868e-12	1.47254e-14	5.63972e-16	1.26955e-22	8.33772e-23	1.35156e-10	1.10903e-14	3.76716e-12	7.17353e-12	1.0802e-17	2.12303e-16	2.04308e-32	1.74937e-33	3.37621e-16	3.17544e-15	5.2114e-12	9.4241e-12		1.41494e-15	7.21939e-16	2.77165e-17
15.2941	4.18969e-14	1.42903e-15	3.84015e-22	2.82977e-22	3.67131e-10	2.59835e-14	3.30082e-12	5.99332e-12	2.08223e-14	8.77274e-16	2.28716e-22	1.50654e-22	1.73224e-10	1.64519e-14	5.72825e-12	1.0779e-11	2.04843e-17	3.82453e-16	6.54208e-32	5.80614e-33	5.97203e-16	5.298e-15	7.92435e-12	1.41608e-11		2.09235e-15	1.07168e-15	4.92118e-17
15.6863	5.91117e-14	2.13668e-15	6.89282e-22	5.09427e-22	4.69774e-10	3.78175e-14	5.00049e-12	8.97314e-12	2.93828e-14	1.37159e-15	4.10531e-22	2.71213e-22	2.21655e-10	2.44691e-14	8.67796e-12	1.61385e-11	3.86299e-17	6.85454e-16	2.07487e-31	1.9082e-32	1.05123e-15	8.84898e-15	1.2005e-11	2.1202e-11		3.08762e-15	1.58896e-15	8.76557e-17
16.0784	8.32241e-14	3.19715e-15	1.23268e-21	9.13711e-22	6.00137e-10	5.50622e-14	7.5473e-12	1.33863e-11	4.13775e-14	2.15597e-15	7.34172e-22	4.86449e-22	2.83165e-10	3.65025e-14	1.30979e-11	2.40762e-11	7.24455e-17	1.22224e-15	6.51789e-31	6.21002e-32	1.84144e-15	1.47841e-14	1.81195e-11	3.16302e-11		4.54715e-15	2.35372e-15	1.56412e-16
16.4706	1.16926e-13	4.78952e-15	2.19636e-21	1.6328e-21	7.65429e-10	8.0227e-14	1.13491e-11	1.98983e-11	5.81503e-14	3.40758e-15	1.30814e-21	8.69284e-22	3.61156e-10	5.46355e-14	1.96958e-11	3.57891e-11	1.3511e-16	2.16826e-15	2.028e-30	2.00121e-31	3.20997e-15	2.46885e-14	2.72472e-11	4.70183e-11		6.68372e-15	3.48432e-15	2.79261e-16
16.8627	1.63932e-13	7.18628e-15	3.89907e-21	2.90706e-21	9.74661e-10	1.17014e-13	1.70027e-11	2.94721e-11	8.15582e-14	5.41518e-15	2.32225e-21	1.54769e-21	4.59879e-10	8.20716e-14	2.95077e-11	5.30093e-11	2.5058e-16	3.82686e-15	6.24986e-30	6.3859e-31	5.56835e-15	4.11821e-14	4.0821e-11	6.96418e-11		9.80635e-15	5.15646e-15	4.98352e-16
17.2549	2.29355e-13	1.08038e-14	6.89636e-21	5.1567e-21	1.23907e-09	1.70903e-13	2.53783e-11	4.34956e-11	1.14163e-13	8.65069e-15	4.10742e-21	2.74537e-21	5.84638e-10	1.23753e-13	4.40437e-11	7.82333e-11	4.62162e-16	6.71974e-15	1.90773e-29	2.01782e-30	9.61248e-15	6.85788e-14	6.09304e-11	1.02781e-10		1.43635e-14	7.63175e-15	8.88101e-16
17.6471	3.20221e-13	1.62812e-14	1.2153e-20	9.11353e-21	1.57265e-09	2.50031e-13	3.77395e-11	6.39615e-11	1.59494e-13	1.38866e-14	7.23822e-21	4.85194e-21	7.42033e-10	1.87328e-13	6.5497e-11	1.15046e-10	8.47672e-16	1.17392e-14	5.76775e-29	6.31358e-30	1.65131e-14	1.13952e-13	9.06093e-11	1.51144e-10		2.10058e-14	1.13011e-14	1.57929e-15
18.0392	4.46161e-13	2.46027e-14	2.13377e-20	1.60472e-20	1.99278e-09	3.66522e-13	5.59137e-11	9.37197e-11	2.22405e-13	2.23888e-14	1.27086e-20	8.54332e-21	9.40274e-10	2.84654e-13	9.70392e-11	1.68573e-10	1.54614e-15	2.04034e-14	1.72718e-28	1.95613e-29	2.82295e-14	1.88853e-13	1.34245e-10	2.21468e-10		3.06774e-14	1.67514e-14	2.80072e-15
18.4314	6.20356e-13	3.72909e-14	3.73263e-20	2.81518e-20	2.52106e-09	5.38494e-13	8.25333e-11	1.3683e-10	3.09569e-13	3.62314e-14	2.22313e-20	1.49877e-20	1.18954e-09	4.34155e-13	1.43239e-10	2.46118e-10	2.80449e-15	3.52813e-14	5.12288e-28	6.00139e-29	4.80243e-14	3.12058e-13	1.98159e-10	3.23346e-10		4.47488e-14	2.48673e-14	4.9507e-15
18.8235	8.60809e-13	5.67084e-14	6.50556e-20	4.92053e-20	3.18419e-09	7.93102e-13	1.21375e-10	1.99055e-10	4.30147e-13	5.88109e-14	3.87466e-20	2.61964e-20	1.50244e-09	6.64475e-13	2.10651e-10	3.58045e-10	5.05878e-15	6.06965e-14	1.50499e-27	1.82321e-28	8.13023e-14	5.13957e-13	2.91419e-10	4.70396e-10		6.52112e-14	3.69901e-14	8.71917e-15
19.2157	1.19206e-12	8.65332e-14	1.12968e-19	8.56869e-20	4.01521e-09	1.17114e-12	1.77835e-10	2.88537e-10	5.96714e-13	9.5682e-14	6.72832e-20	4.56187e-20	1.89458e-09	1.02017e-12	3.08641e-10	5.19005e-10	9.07453e-15	1.03887e-13	4.37919e-27	5.48469e-28	1.36971e-13	8.43504e-13	4.26982e-10	6.81864e-10		9.49621e-14	5.51638e-14	1.52951e-14
19.6078	1.6475e-12	1.32505e-13	1.95449e-19	1.48667e-19	5.0549e-09	1.73405e-12	2.59593e-10	4.16745e-10	8.26532e-13	1.55911e-13	1.16408e-19	7.91485e-20	2.38518e-09	1.57053e-12	4.50539e-10	7.49623e-10	1.61878e-14	1.76902e-13	1.26211e-26	1.6338e-27	2.29633e-13	1.37919e-12	6.23288e-10	9.84851e-10		1.38224e-13	8.25197e-14	2.67167e-14
20	2.27252e-12	2.036e-13	3.36907e-19	2.56986e-19	6.35345e-09	2.57447e-12	3.77536e-10	5.9976e-10	1.14331e-12	2.54263e-13	2.00659e-19	1.36817e-19	2.99797e-09	2.42323e-12	6.55239e-10	1.07883e-09	2.87171e-14	2.99699e-13	3.60285e-26	4.81921e-27	3.83112e-13	2.24624e-12	9.06477e-10	1.41737e-09		2.01166e-13	1.23881e-13	4.64597e-14
20.3922	3.12866e-12	3.13869e-13	5.78616e-19	4.42591e-19	7.97263e-09	3.83228e-12	5.47031e-10	8.60049e-10	1.57964e-12	4.14708e-13	3.4462e-19	2.35631e-19	3.76208e-09	3.74531e-12	9.49412e-10	1.54704e-09	5.06614e-14	5.05141e-13	1.01868e-25	1.40762e-26	6.36063e-13	3.64353e-12	1.31345e-09	2.03251e-09		2.92823e-13	1.86715e-13	8.04186e-14
20.7843	4.29936e-12	4.8533e-13	9.90088e-19	7.59439e-19	9.9882e-09	5.71882e-12	7.89685e-10	1.22888e-09	2.18041e-12	6.76039e-13	5.89689e-19	4.04317e-19	4.71331e-09	5.79552e-12	1.37056e-09	2.2105e-09	8.88794e-14	8.47069e-13	2.85279e-25	4.07121e-26	1.05089e-12	5.88527e-12	1.89608e-09	2.90416e-09		4.26467e-13	2.82629e-13	1.38537e-13
21.1765	5.89753e-12	7.52484e-13	1.68795e-18	1.29831e-18	1.2493e-08	8.55341e-12	1.13575e-09	1.74957e-09	3.00759e-12	1.10081e-12	1.00533e-18	6.91208e-19	5.89553e-09	8.9737e-12	1.9712e-09	3.14715e-09	1.55064e-13	1.41319e-12	7.9131e-25	1.16599e-25	1.72782e-12	9.46552e-12	2.72703e-09	4.13474e-09		6.21656e-13	4.29745e-13	2.37495e-13
21.5686	8.07588e-12	1.16936e-12	2.86713e-18	2.21138e-18	1.56007e-08	1.28184e-11	1.62743e-09	2.48196e-09	4.14703e-12	1.7895e-12	1.70764e-18	1.17731e-18	7.36239e-09	1.38961e-11	2.82456e-09	4.46459e-09	2.69034e-13	2.34564e-12	2.17403e-24	3.3067e-25	2.82697e-12	1.51572e-11	3.9076e-09	5.86562e-09		9.07314e-13	6.5644e-13	4.05123e-13
21.9608	1.10409e-11	1.82049e-12	4.85219e-18	3.75271e-18	1.94497e-08	1.92415e-11	2.32332e-09	3.5083e-09	5.71807e-12	2.90282e-12	2.88993e-18	1.9979e-18	9.17944e-09	2.15094e-11	4.03235e-09	6.31081e-09	4.64183e-13	3.87347e-12	5.91601e-24	9.28597e-25	4.60286e-12	2.41633e-11	5.57851e-09	8.29121e-09		1.32636e-12	1.00726e-12	6.87592e-13
22.3529	1.50715e-11	2.83789e-12	8.18147e-18	6.34486e-18	2.42092e-08	2.89194e-11	3.3045e-09	4.94126e-09	7.88748e-12	4.69674e-12	4.87283e-18	3.37793e-18	1.14266e-08	3.32636e-11	5.73529e-09	8.88848e-09	7.9645e-13	6.36378e-12	1.59454e-23	2.5822e-24	7.45792e-12	3.83471e-11	7.93442e-09	1.16778e-08		1.94272e-12	1.55225e-12	1.16108e-12
22.7451	2.0545e-11	4.42734e-12	1.37445e-17	1.0688e-17	3.00845e-08	4.35021e-11	4.68263e-09	6.93452e-09	1.08895e-11	7.57708e-12	8.18611e-18	5.69017e-18	1.42012e-08	5.13711e-11	8.12718e-09	1.24741e-08	1.35898e-12	1.04018e-11	4.25681e-23	7.11023e-24	1.20252e-11	6.05794e-11	1.12435e-08	1.63886e-08		2.85187e-12	2.40162e-12	1.95057e-12
23.1373	2.79717e-11	6.90877e-12	2.30052e-17	1.79378e-17	3.73252e-08	6.54657e-11	6.61092e-09	9.69695e-09	1.50552e-11	1.21842e-11	1.37018e-17	9.54987e-18	1.76214e-08	7.91951e-11	1.1474e-08	1.74433e-08	2.30597e-12	1.69152e-11	1.12558e-22	1.93869e-23	1.92951e-11	9.52611e-11	1.58735e-08	2.29172e-08		4.19693e-12	3.72886e-12	3.25997e-12
23.5294	3.80425e-11	1.07781e-11	3.83643e-17	2.99942e-17	4.62338e-08	9.85174e-11	9.29871e-09	1.35111e-08	2.08556e-11	1.95237e-11	2.28496e-17	1.59686e-17	2.18309e-08	1.21827e-10	1.61389e-08	2.43045e-08	3.89119e-12	2.73668e-11	2.94789e-22	5.23437e-23	3.08096e-11	1.49104e-10	2.23273e-08	3.19316e-08		6.19293e-12	5.80683e-12	5.42005e-12
23.9216	5.16949e-11	1.68016e-11	6.37429e-17	4.99692e-17	5.71764e-08	1.48191e-10	1.30308e-08	1.87581e-08	2.89652e-11	3.11672e-11	3.79651e-17	2.66031e-17	2.70035e-08	1.86944e-10	2.26164e-08	3.37429e-08	6.52974e-12	4.40503e-11	7.64695e-22	1.39943e-22	4.89563e-11	2.32292e-10	3.12885e-08	4.4332e-08		9.1637e-12	9.06415e-12	8.96442e-12
24.3137	7.02028e-11	2.6159e-11	1.05521e-16	8.29401e-17	7.05951e-08	2.22721e-10	1.81932e-08	2.59491e-08	4.03566e-11	4.95581e-11	6.28483e-17	4.41565e-17	3.33499e-08	2.86068e-10	3.15763e-08	4.66786e-08	1.08967e-11	7.05425e-11	1.96476e-21	3.70483e-22	7.7413e-11	3.60195e-10	4.36841e-08	6.13271e-08		1.35977e-11	1.41728e-11	1.4749e-11
24.7059	9.53024e-11	4.06597e-11	1.7404e-16	1.37159e-16	8.70231e-08	3.34319e-10	2.53067e-08	3.57681e-08	5.64415e-11	7.84764e-11	1.03659e-16	7.30222e-17	4.11246e-08	4.36418e-10	4.39226e-08	6.43417e-08	1.80835e-11	1.12391e-10	5.00004e-21	9.71217e-22	1.21816e-10	5.55894e-10	6.07644e-08	8.45331e-08		2.02328e-11	2.2184e-11	2.41387e-11
25.098	1.29367e-10	6.30675e-11	2.85998e-16	2.25985e-16	1.07102e-07	5.01024e-10	3.50711e-08	4.91257e-08	7.92813e-11	1.23739e-10	1.70343e-16	1.20313e-16	5.06351e-08	6.63609e-10	6.08698e-08	8.837e-08	2.98439e-11	1.7815e-10	1.26032e-20	2.52113e-21	1.90754e-10	8.53865e-10	8.42099e-08	1.16102e-07		3.01837e-11	3.4737e-11	3.92983e-11
25.4902	1.75652e-10	9.75859e-11	4.68252e-16	3.70966e-16	1.31605e-07	7.49387e-10	4.84231e-08	6.72295e-08	1.11903e-10	1.94253e-10	2.789e-16	1.97501e-16	6.22523e-08	1.00556e-09	8.40436e-08	1.20936e-07	4.89794e-11	2.80945e-10	3.14652e-20	6.48046e-21	2.97255e-10	1.30534e-09	1.16269e-07	1.58888e-07		4.5135e-11	5.43798e-11	6.3641e-11
25.8824	2.38639e-10	1.5058e-10	7.63838e-16	6.06716e-16	1.61456e-07	1.11832e-09	6.66106e-08	9.16748e-08	1.58772e-10	3.03579e-10	4.54968e-16	3.23016e-16	7.64236e-08	1.51815e-09	1.1561e-07	1.6491e-07	7.9939e-11	4.4079e-10	7.78079e-20	1.64948e-20	4.60965e-10	1.98604e-09	1.5994e-07	2.16661e-07		6.76306e-11	8.50588e-11	1.02518e-10
26.2745	3.24525e-10	2.31642e-10	1.24145e-15	9.8863e-16	1.97766e-07	1.66461e-09	9.129e-08	1.2456e-07	2.26501e-10	4.72262e-10	7.39473e-16	5.26355e-16	9.36879e-08	2.28332e-09	1.58444e-07	2.24065e-07	1.29745e-10	6.88051e-10	1.90572e-19	4.15737e-20	7.11359e-10	3.00732e-09	2.19197e-07	2.9438e-07		1.01507e-10	1.32861e-10	1.6427e-10
26.6667	4.41915e-10	3.55162e-10	2.0103e-15	1.60502e-15	2.41862e-07	2.47078e-09	1.2465e-07	1.68635e-07	3.24908e-10	7.31251e-10	1.1975e-15	8.54543e-16	1.14695e-07	3.42059e-09	2.16342e-07	3.03348e-07	2.09415e-10	1.06853e-09	4.62316e-19	1.03758e-19	1.09243e-09	4.53205e-09	2.99297e-07	3.98543e-07		1.52543e-10	2.07136e-10	2.61825e-10
27.0588	6.02802e-10	5.42621e-10	3.2434e-15	2.59613e-15	2.9533e-07	3.65619e-09	1.69569e-07	2.27485e-07	4.68599e-10	1.12693e-09	1.93219e-15	1.38227e-15	1.40228e-07	5.10352e-09	2.94305e-07	4.09211e-07	3.36134e-10	1.65094e-09	1.11087e-18	2.56422e-19	1.66948e-09	6.79719e-09	4.07153e-07	5.37627e-07		2.2942e-10	3.2218e-10	4.15104e-10
27.451	8.23977e-10	8.25921e-10	5.21375e-15	4.1838e-15	3.60065e-07	5.39269e-09	2.29822e-07	3.05773e-07	6.79323e-10	1.72841e-09	3.10634e-15	2.2277e-15	1.71231e-07	7.58281e-09	3.98879e-07	5.50036e-07	5.3654e-10	2.53776e-09	2.64379e-18	6.2751e-19	2.53893e-09	1.01457e-08	5.51825e-07	7.22644e-07		3.45148e-10	4.9975e-10	6.54625e-10
27.8431	1.12903e-09	1.25221e-09	8.35052e-15	6.71762e-15	4.38321e-07	7.92657e-09	3.10331e-07	4.09528e-07	9.89455e-10	2.63814e-09	4.97603e-15	3.5771e-15	2.08843e-07	1.12187e-08	5.38608e-07	7.36672e-07	8.51685e-10	3.88105e-09	6.23211e-18	1.5206e-18	3.84242e-09	1.50712e-08	7.45131e-07	9.67848e-07		5.19167e-10	7.72796e-10	1.02687e-09
28.2353	1.55122e-09	1.8908e-09	1.33258e-14	1.07464e-14	5.32785e-07	1.1609e-08	4.17491e-07	5.4652e-07	1.44716e-09	4.00713e-09	7.94264e-15	5.72296e-15	2.54442e-07	1.65263e-08	7.24592e-07	9.83095e-07	1.34444e-09	5.90506e-09	1.45508e-17	3.64874e-18	5.78685e-09	2.22805e-08	1.00243e-06	1.2916e-06		7.80424e-10	1.19097e-09	1.60224e-09
28.6275	2.13755e-09	2.84307e-09	2.11884e-14	1.71283e-14	6.46654e-07	1.69385e-08	5.59573e-07	7.26722e-07	2.12395e-09	6.05673e-09	1.26333e-14	9.12297e-15	3.09693e-07	2.42383e-08	9.71185e-07	1.30724e-06	2.11053e-09	8.93876e-09	3.36497e-17	8.66962e-18	8.67286e-09	3.27804e-08	1.34357e-06	1.71746e-06		1.17186e-09	1.82871e-09	2.48672e-09
29.0196	2.95462e-09	4.25648e-09	3.35687e-14	2.72003e-14	7.83726e-07	2.46186e-08	7.47232e-07	9.62873e-07	3.12581e-09	9.10961e-09	2.00244e-14	1.44907e-14	3.76619e-07	3.53911e-08	1.29688e-06	1.73203e-06	3.29478e-09	1.34619e-08	7.70759e-17	2.0398e-17	1.2935e-08	4.79969e-08	1.79414e-06	2.27555e-06		1.75694e-09	2.79702e-09	3.83895e-09
29.4118	4.09693e-09	6.34442e-09	5.29926e-14	4.30374e-14	9.48513e-07	3.56383e-08	9.94129e-07	1.27119e-06	4.60929e-09	1.36335e-08	3.16327e-14	2.29348e-14	4.57679e-07	5.14437e-08	1.72538e-06	2.28661e-06	5.11502e-09	2.01704e-08	1.74864e-16	4.75234e-17	1.91978e-08	6.99391e-08	2.38694e-06	3.00416e-06		2.62903e-09	4.26056e-09	5.89498e-09
29.8039	5.69866e-09	9.41399e-09	8.33598e-14	6.78479e-14	1.14638e-06	5.13796e-08	1.3177e-06	1.6722e-06	6.80493e-09	2.03026e-08	4.98074e-14	3.61727e-14	5.55873e-07	7.44388e-08	2.28695e-06	3.00793e-06	7.89688e-09	3.00677e-08	3.92937e-16	1.09637e-16	2.83545e-08	1.01422e-07	3.16383e-06	3.95182e-06		3.9249e-09	6.46222e-09	9.00403e-09
30.1961	7.95042e-09	1.39047e-08	1.30671e-13	1.06575e-13	1.38368e-06	7.37643e-08	1.74013e-06	2.19182e-06	1.00509e-08	3.00834e-08	7.81804e-14	5.68565e-14	6.74875e-07	1.0722e-07	3.02008e-06	3.9426e-06	1.21241e-08	4.45925e-08	8.7456e-16	2.5046e-16	4.16749e-08	1.46371e-07	4.17806e-06	5.17978e-06		5.84397e-09	9.75837e-09	1.36797e-08
30.5882	1.11228e-08	2.04423e-08	2.04133e-13	1.66808e-13	1.66797e-06	1.05451e-07	2.28947e-06	2.86261e-06	1.48409e-08	4.4353e-08	1.2236e-13	8.90714e-14	8.19198e-07	1.53729e-07	3.97346e-06	5.14915e-06	1.8511e-08	6.57963e-08	1.92796e-15	5.66567e-16	6.09551e-08	2.10223e-07	5.49697e-06	6.76494e-06		8.67558e-09	1.46689e-08	2.06728e-08
30.9804	1.55993e-08	2.99123e-08	3.17833e-13	2.60156e-13	2.00824e-06	1.50098e-07	3.00106e-06	3.72526e-06	2.18933e-08	6.50633e-08	1.91002e-13	1.39098e-13	9.94413e-07	2.1939e-07	5.20843e-06	6.70081e-06	2.81059e-08	9.6587e-08	4.20971e-15	1.2691e-15	8.87216e-08	3.00476e-07	7.20544e-06	8.80348e-06		1.28375e-08	2.1948e-08	3.10746e-08
31.3725	2.1923e-08	4.35615e-08	4.93273e-13	4.04329e-13	2.41515e-06	2.12714e-07	3.91926e-06	4.83049e-06	3.22471e-08	9.49644e-08	2.97471e-13	2.16576e-13	1.20742e-06	3.11643e-07	6.80195e-06	8.68877e-06	4.24375e-08	1.41063e-07	9.10432e-15	2.81493e-15	1.28508e-07	4.27409e-07	9.40992e-06	1.14152e-05		1.89296e-08	3.26835e-08	4.64617e-08
31.7647	3.08607e-08	6.31347e-08	7.63211e-13	6.26252e-13	2.90139e-06	3.00114e-07	5.09944e-06	6.24115e-06	4.73984e-08	1.37909e-07	4.6245e-13	3.363e-13	1.4668e-06	4.40619e-07	8.8501e-06	1.12261e-05	6.37219e-08	2.04967e-07	1.95023e-14	6.18262e-15	1.85232e-07	6.05036e-07	1.22433e-05	1.47486e-05		2.78092e-08	4.84356e-08	6.90985e-08
32.1569	4.34921e-08	9.10608e-08	1.1775e-12	9.66763e-13	3.48207e-06	4.21532e-07	6.61041e-06	8.03484e-06	6.949e-08	1.99264e-07	7.18044e-13	5.20981e-13	1.78328e-06	6.20051e-07	1.14723e-05	1.44522e-05	9.51513e-08	2.96301e-07	4.13779e-14	1.34465e-14	2.65696e-07	8.52357e-07	1.58709e-05	1.89871e-05		4.06946e-08	7.14288e-08	1.02217e-07
32.549	6.13327e-08	1.30701e-07	1.81196e-12	1.48766e-12	4.1752e-06	5.894e-07	8.53736e-06	1.03069e-05	1.01574e-07	2.86461e-07	1.11435e-12	8.05555e-13	2.17031e-06	8.6845e-07	1.48164e-05	1.85388e-05	1.41295e-07	4.26147e-07	8.69547e-14	2.89584e-14	3.7926e-07	1.19499e-06	2.0497e-05	2.43559e-05		5.93075e-08	1.04816e-07	1.50405e-07
32.9412	8.65015e-08	1.86678e-07	2.78196e-12	2.28231e-12	5.0023e-06	8.2037e-07	1.09852e-05	1.3174e-05	1.47975e-07	4.09731e-07	1.73011e-12	1.24395e-12	2.64479e-06	1.21062e-06	1.90643e-05	2.36956e-05	2.08653e-07	6.09766e-07	1.80993e-13	6.17551e-14	5.38731e-07	1.66729e-06	2.63736e-05	3.11306e-05		8.6068e-08	1.53041e-07	2.20132e-07
33.3333	1.2195e-07	2.6532e-07	4.26331e-12	3.49165e-12	5.98909e-06	1.13662e-06	1.40825e-05	1.67783e-05	2.14783e-07	5.8308e-07	2.69009e-12	1.91989e-12	3.22806e-06	1.67962e-06	2.44394e-05	3.0178e-05	3.06414e-07	8.6805e-07	3.7314e-13	1.30407e-13	7.61534e-07	2.31504e-06	3.38092e-05	3.96469e-05		1.24358e-07	2.22327e-07	3.2047e-07
33.7255	1.71769e-07	3.75229e-07	6.52467e-12	5.32836e-12	7.1664e-06	1.56754e-06	1.79862e-05	2.1292e-05	3.10526e-07	8.25564e-07	4.19418e-12	2.96427e-12	3.94714e-06	2.31928e-06	3.12138e-05	3.8296e-05	4.47486e-07	1.22943e-06	7.61949e-13	2.72684e-13	1.07125e-06	3.19895e-06	4.31807e-05	5.03118e-05		1.78878e-07	3.21343e-07	4.64059e-07
34.1176	2.41607e-07	5.28038e-07	9.97826e-12	8.11376e-12	8.57121e-06	2.15182e-06	2.2887e-05	2.69231e-05	4.47076e-07	1.16296e-06	6.5662e-12	4.58369e-12	4.83621e-06	3.18732e-06	3.97183e-05	4.84233e-05	6.49885e-07	1.73236e-06	1.54107e-12	5.64613e-13	1.4996e-06	4.39905e-06	5.49455e-05	6.36164e-05		2.56122e-07	4.62082e-07	6.68407e-07
34.5098	3.39219e-07	7.39383e-07	1.52599e-11	1.23343e-11	1.0248e-05	2.94014e-06	2.90154e-05	3.39213e-05	6.40861e-07	1.62993e-06	1.03372e-11	7.10796e-12	5.93869e-06	4.3594e-06	5.03528e-05	6.10091e-05	9.38597e-07	2.42858e-06	3.08719e-12	1.15764e-12	2.08902e-06	6.02021e-06	6.96568e-05	8.01506e-05		3.65008e-07	6.6105e-07	9.57616e-07
34.902	4.75201e-07	1.03015e-06	2.33572e-11	1.87289e-11	1.22504e-05	3.99852e-06	3.66484e-05	4.25852e-05	9.14473e-07	2.2728e-06	1.63886e-11	1.10701e-11	7.30967e-06	5.93409e-06	6.35982e-05	7.65902e-05	1.34806e-06	3.38721e-06	6.12556e-12	2.3503e-12	2.89596e-06	8.19909e-06	8.79797e-05	0.00010062		5.17715e-07	9.40812e-07	1.36466e-06
35.2941	6.63951e-07	1.4281e-06	3.58154e-11	2.84255e-11	1.46429e-05	5.41241e-06	4.6118e-05	5.32702e-05	1.29879e-06	3.15312e-06	2.61998e-11	1.73429e-11	9.01908e-06	8.03905e-06	8.00303e-05	9.58055e-05	1.92542e-06	4.70014e-06	1.20385e-11	4.72505e-12	3.99509e-06	1.11127e-05	0.000110711	0.000125863		7.30772e-07	1.33204e-06	1.93436e-06
35.6863	9.24927e-07	1.96984e-06	5.50739e-11	4.31567e-11	1.75037e-05	7.29185e-06	5.78197e-05	6.63971e-05	1.83576e-06	4.35218e-06	4.22784e-11	2.73746e-11	1.11556e-05	1.08387e-05	0.000100335	0.000119412	2.73481e-06	6.48867e-06	2.34337e-11	9.40634e-12	5.48457e-06	1.49891e-05	0.000138799	0.000156874		1.02648e-06	1.87614e-06	2.72731e-06
36.0784	1.28428e-06	2.70346e-06	8.50174e-11	6.5604e-11	2.09272e-05	9.77764e-06	7.22219e-05	8.24619e-05	2.58199e-06	5.97665e-06	6.89072e-11	4.35974e-11	1.38316e-05	1.45434e-05	0.000125325	0.0001483	3.86291e-06	8.91206e-06	4.51808e-11	1.85424e-11	7.49278e-06	2.01202e-05	0.000173368	0.000194824		1.43474e-06	2.62873e-06	3.82483e-06
36.4706	1.77693e-06	3.69163e-06	1.31886e-10	9.99525e-11	2.50277e-05	1.30489e-05	8.98776e-05	0.000102046	3.61341e-06	8.16569e-06	1.13442e-10	7.01385e-11	1.71891e-05	1.9421e-05	0.00015596	0.000183516	5.42612e-06	1.21781e-05	8.62798e-11	3.61944e-11	1.01865e-05	2.68776e-05	0.000215745	0.000241087		1.99541e-06	3.66397e-06	5.33547e-06
36.8627	2.44927e-06	5.01562e-06	2.05783e-10	1.52795e-10	2.99435e-05	1.73323e-05	0.000111435	0.000125829	5.03118e-06	1.10997e-05	1.8856e-10	1.1406e-10	2.14072e-05	2.58103e-05	0.000193364	0.000226281	7.57966e-06	1.6556e-05	1.63195e-10	6.99597e-11	1.37814e-05	3.57313e-05	0.000267486	0.000297265		2.76127e-06	5.08015e-06	7.40313e-06
37.2549	3.36251e-06	6.78008e-06	3.23184e-10	2.34609e-10	3.58422e-05	2.29126e-05	0.000137652	0.000154598	6.96922e-06	1.50112e-05	3.16129e-10	1.87517e-10	2.67112e-05	3.41373e-05	0.000238852	0.000278009	1.05292e-05	2.23929e-05	3.05737e-10	1.33901e-10	1.85542e-05	4.72724e-05	0.000330407	0.000365217		3.80178e-06	7.00674e-06	1.02174e-05
37.6471	4.59694e-06	9.119e-06	5.11096e-10	3.622e-10	4.29265e-05	3.01456e-05	0.000169408	0.000189263	9.60365e-06	2.01976e-05	5.33836e-10	3.11501e-10	3.33835e-05	4.49341e-05	0.000293946	0.000340336	1.45456e-05	3.0133e-05	5.67326e-10	2.53778e-10	2.48584e-05	6.22396e-05	0.000406617	0.000447092		5.20779e-06	9.61319e-06	1.40264e-05
38.0392	6.25721e-06	1.22028e-05	8.13958e-10	5.62724e-10	5.14418e-05	3.94735e-05	0.000207717	0.000230871	1.31646e-05	2.70375e-05	9.06464e-10	5.22297e-10	4.17768e-05	5.8862e-05	0.00036041	0.000415143	1.99825e-05	4.03414e-05	1.0427e-09	4.7627e-10	3.31428e-05	8.15504e-05	0.000498551	0.000545358		7.09738e-06	1.31198e-05	1.91528e-05
38.4314	8.47884e-06	1.62468e-05	1.30504e-09	8.80348e-10	6.16841e-05	5.14416e-05	0.000253747	0.000280615	1.79505e-05	3.60094e-05	1.5449e-09	8.82561e-10	5.23298e-05	7.67369e-05	0.000440264	0.000504574	2.72996e-05	5.37326e-05	1.89815e-09	8.85082e-10	4.39732e-05	0.000106337	0.000609007	0.000662834		9.62299e-06	1.78111e-05	2.60137e-05
38.8235	1.14361e-05	2.15216e-05	2.10515e-09	1.38724e-09	7.40107e-05	6.67188e-05	0.000308829	0.000339855	2.43462e-05	4.77141e-05	2.6379e-09	1.50016e-09	6.55856e-05	9.95596e-05	0.00053582	0.000611071	3.70892e-05	7.12036e-05	3.42251e-09	1.62871e-09	5.80591e-05	0.00013799	0.00074118	0.000802725		1.29802e-05	2.40524e-05	3.51442e-05
39.2157	1.53519e-05	2.83644e-05	3.41325e-09	2.20167e-09	8.88511e-05	8.61203e-05	0.000374477	0.000410125	3.28443e-05	6.2901e-05	4.50475e-09	2.55993e-09	8.22138e-05	0.000128549	0.000649701	0.000737389	5.01102e-05	9.38736e-05	6.11225e-09	2.96781e-09	7.62843e-05	0.0001782	0.000898695	0.000968651		1.74181e-05	3.23092e-05	4.72267e-05
39.6078	2.05089e-05	3.71935e-05	5.556e-09	3.51763e-09	0.000106721	0.000110633	0.000452399	0.000493149	4.40706e-05	8.24992e-05	7.68151e-09	4.3768e-09	0.000103036	0.000165183	0.000784867	0.000886628	6.73273e-05	0.00012313	1.08119e-08	5.355e-09	9.97432e-05	0.000229017	0.00108565	0.00116468		2.32523e-05	4.31711e-05	6.31251e-05
40	2.72636e-05	4.85235e-05	9.06743e-09	5.65305e-09	0.000128237	0.000141444	0.000544513	0.000590856	5.88152e-05	0.000107652	1.30611e-08	7.48365e-09	0.000129053	0.000211236	0.000944642	0.00106224	8.99585e-05	0.000160679	1.89428e-08	9.56783e-09	0.000129782	0.000292906	0.00130664	0.00139535		3.08793e-05	5.73795e-05	8.39265e-05
40.3922	3.60623e-05	6.29837e-05	1.48159e-08	9.12778e-09	0.000154133	0.00017997	0.000652957	0.000705383	7.80683e-05	0.000139757	2.2118e-08	1.27751e-08	0.000161482	0.00026883	0.00113273	0.00126808	0.000119531	0.000208609	3.28722e-08	1.69277e-08	0.000168046	0.000372812	0.00156678	0.00166571		4.07946e-05	7.58605e-05	0.000110988
40.7843	4.74595e-05	8.13382e-05	2.42047e-08	1.47884e-08	0.000185283	0.000227895	0.000780101	0.000839092	0.000103062	0.000180513	3.72657e-08	2.17407e-08	0.000201789	0.000340481	0.00135324	0.00150837	0.000157944	0.000269453	5.65012e-08	2.96561e-08	0.000216534	0.000472228	0.00187176	0.00198132		5.36123e-05	9.97628e-05	0.000145995
41.1765	6.21399e-05	0.000104508	3.94847e-08	2.40066e-08	0.00022272	0.000287201	0.000928554	0.000994568	0.000135316	0.000231964	6.24167e-08	3.68381e-08	0.000251736	0.000429155	0.00161069	0.00178776	0.000207545	0.000346267	9.61899e-08	5.14471e-08	0.000277656	0.000595269	0.00222783	0.00234827		7.00891e-05	0.000130501	0.00019102
41.5686	8.09418e-05	0.000133596	6.42387e-08	3.89911e-08	0.000267658	0.000360208	0.00110117	0.00117463	0.000176697	0.00029656	1.03854e-07	6.20844e-08	0.00031342	0.000538321	0.00191003	0.00211129	0.000271212	0.000442707	1.62198e-07	8.83768e-08	0.0003543	0.000746749	0.0026418	0.00277319		9.11499e-05	0.000169806	0.000248601
41.9608	0.000104885	0.000169913	1.04121e-07	6.32725e-08	0.00032152	0.000449608	0.00130104	0.00138232	0.000229471	0.000377212	1.71566e-07	1.03982e-07	0.000389328	0.000672008	0.0022566	0.00248443	0.000352445	0.000563118	2.70896e-07	1.5033e-07	0.000449903	0.000932259	0.00312109	0.00326324		0.000117918	0.000219777	0.000321817
42.3529	0.000135199	0.000215005	1.67978e-07	1.02451e-07	0.000385965	0.000558507	0.00153151	0.00162091	0.000296377	0.00047735	2.81273e-07	1.72949e-07	0.000482387	0.000834857	0.00265618	0.00291303	0.00045547	0.000712623	4.48129e-07	2.53213e-07	0.000568524	0.00115824	0.00367367	0.00382611		0.000151745	0.000282945	0.000414377
42.7451	0.000173356	0.00027068	2.69516e-07	1.65332e-07	0.000462917	0.000690458	0.00179614	0.00189387	0.000380694	0.000600991	4.5746e-07	2.85509e-07	0.000596021	0.00103218	0.00311495	0.00340332	0.000585348	0.000897217	7.34255e-07	4.22334e-07	0.000714928	0.00143206	0.00430808	0.00446998		0.000194251	0.000362337	0.000530719
43.1373	0.000221106	0.00033904	4.29775e-07	2.65639e-07	0.000554589	0.000849491	0.0020987	0.00220487	0.000486316	0.000752799	7.37866e-07	4.67592e-07	0.000734204	0.00127	0.00363942	0.00396187	0.000748093	0.00112386	1.19161e-06	6.97521e-07	0.000894662	0.00176207	0.00503332	0.00520345		0.000247356	0.000461542	0.000676107
43.5294	0.000280509	0.000422507	6.80725e-07	4.24552e-07	0.000663517	0.00104014	0.00244316	0.00255775	0.000617831	0.000938144	1.18004e-06	7.59453e-07	0.00090152	0.00155509	0.00423647	0.00459554	0.000950787	0.00140057	1.91542e-06	1.14075e-06	0.00111414	0.00215767	0.00585887	0.00603553		0.00031332	0.000584789	0.000856738
43.9216	0.00035397	0.000523846	1.07046e-06	6.7444e-07	0.000792586	0.00126748	0.00283365	0.0029565	0.000780597	0.00116316	1.87082e-06	1.22291e-06	0.00110321	0.00189501	0.00491319	0.00531144	0.0012017	0.0017365	3.04956e-06	1.84736e-06	0.00138071	0.00262934	0.00679456	0.00697555		0.000394786	0.000737013	0.00107985
44.3137	0.000444277	0.00064619	1.67055e-06	1.06427e-06	0.000945055	0.00153709	0.00327441	0.00340518	0.000980819	0.00143479	2.93976e-06	1.95187e-06	0.00134524	0.00229812	0.00567693	0.00611684	0.00151042	0.00214201	4.80898e-06	2.96242e-06	0.00170274	0.00318866	0.00785049	0.00803304		0.000494811	0.000923931	0.00135381
44.7059	0.000554626	0.000793056	2.58643e-06	1.66733e-06	0.00112458	0.00185512	0.00376975	0.00390792	0.00122561	0.00176083	4.57806e-06	3.08733e-06	0.00163431	0.00277356	0.00653511	0.00701912	0.00188792	0.00262873	7.51125e-06	4.70404e-06	0.00208966	0.00384832	0.00903693	0.00921765		0.00061691	0.0011521	0.00168824
45.098	0.000688653	0.000968355	3.97166e-06	2.59216e-06	0.00133523	0.0022282	0.00432399	0.00446885	0.00152307	0.00214993	7.0648e-06	4.83873e-06	0.00197791	0.00333125	0.00749517	0.00802561	0.00234669	0.00320958	1.16202e-05	7.39652e-06	0.00255205	0.00462204	0.0103641	0.010539		0.00076508	0.001429	0.00209409
45.4902	0.000850451	0.00117639	6.04754e-06	3.99772e-06	0.00158149	0.00266349	0.00494141	0.00509203	0.00188229	0.00261163	1.08026e-05	7.5135e-06	0.00238436	0.00398183	0.00856445	0.00914351	0.00290078	0.00389876	1.78057e-05	1.15163e-05	0.00310159	0.00552454	0.0118422	0.0120065		0.000943833	0.00176302	0.00258366
45.8824	0.00104458	0.00142187	9.12932e-06	6.1142e-06	0.00186829	0.00316855	0.00562616	0.00578139	0.00231341	0.00315631	1.6366e-05	1.15578e-05	0.00286275	0.00473655	0.00975007	0.0103798	0.00356582	0.00471176	2.70239e-05	1.77554e-05	0.00375113	0.00657141	0.013481	0.0136292		0.0011582	0.00216357	0.00317072
46.2745	0.00127607	0.00170983	1.36611e-05	9.2712e-06	0.00220095	0.00375132	0.00638216	0.00654062	0.0028276	0.00379512	2.4565e-05	1.76114e-05	0.00342298	0.0056072	0.0110588	0.011741	0.00435904	0.00566522	4.06237e-05	2.71069e-05	0.00451465	0.00777895	0.0152897	0.0154158		0.00141377	0.00264103	0.00387046
46.6667	0.00155041	0.00204568	2.02612e-05	1.39352e-05	0.00258523	0.00441998	0.00721305	0.00737316	0.003437	0.00453997	3.65283e-05	2.65811e-05	0.00407568	0.00660595	0.0124967	0.0132331	0.00529917	0.00677686	6.04858e-05	4.09788e-05	0.00540716	0.00916397	0.0172768	0.017374		0.00171661	0.00320672	0.00469946
47.0588	0.00187349	0.00243506	2.97805e-05	2.07585e-05	0.00302719	0.00518288	0.00812208	0.008282	0.0041547	0.0054033	5.38107e-05	3.97366e-05	0.00483217	0.00774516	0.0140693	0.0148613	0.00640637	0.00806523	8.92012e-05	6.13437e-05	0.00644462	0.0107435	0.0194498	0.0195106		0.00207333	0.0038729	0.00567565
47.451	0.0022516	0.00288385	4.3376e-05	3.06425e-05	0.00353327	0.00604835	0.00911197	0.00926972	0.00499454	0.00639802	7.85271e-05	5.8834e-05	0.00570431	0.00903712	0.0157813	0.0166301	0.00770198	0.00954955	0.000130296	9.09308e-05	0.00764378	0.0125346	0.0218151	0.0218313		0.00249095	0.00465263	0.00681813
47.8431	0.00269129	0.00339803	6.26016e-05	4.48176e-05	0.0041101	0.00702455	0.0101849	0.0103383	0.00597101	0.00753724	0.00011352	8.62724e-05	0.00670441	0.0104939	0.0176362	0.0185427	0.00920828	0.0112493	0.00018851	0.00013347	0.00902199	0.0145537	0.0243773	0.0243404		0.00297692	0.00555966	0.00814698
48.2353	0.00319933	0.00398357	8.9519e-05	6.49424e-05	0.00476451	0.00811927	0.0113423	0.0114889	0.00709899	0.00883405	0.000162562	0.000125288	0.007845	0.0121269	0.0196361	0.0206013	0.0109482	0.013184	0.000270135	0.000193993	0.0105969	0.0168165	0.0271396	0.0270405		0.00353892	0.00660824	0.00968299
48.6275	0.00378259	0.00464634	0.000126828	9.32244e-05	0.00550334	0.00933971	0.0125847	0.0127223	0.00839346	0.0103012	0.000230595	0.00018019	0.00913868	0.0139465	0.0217821	0.0228064	0.0129446	0.0153725	0.000383417	0.000279203	0.0123863	0.0193374	0.030103	0.0299323		0.00418484	0.00781287	0.0114473
49.0196	0.00444782	0.00539194	0.000178022	0.000132563	0.00633341	0.0106923	0.013912	0.0140379	0.00986919	0.0119508	0.000324011	0.000256643	0.0105978	0.0159622	0.0240733	0.0251571	0.0152204	0.0178328	0.000539018	0.00039791	0.0144074	0.022129	0.0332662	0.0330145		0.00492256	0.00918806	0.0134611
49.4118	0.00520158	0.0062255	0.000247553	0.000186719	0.0072613	0.0121822	0.0153229	0.0154347	0.0115403	0.0137939	0.000450968	0.00036199	0.0122342	0.0181813	0.0265072	0.0276508	0.017797	0.0205813	0.000750549	0.00056154	0.0166767	0.0252015	0.0366257	0.0362834		0.00575984	0.0107479	0.0157448
49.8039	0.00604997	0.00715156	0.000341029	0.000260498	0.0082932	0.0138135	0.016815	0.0169103	0.0134199	0.0158401	0.000621732	0.000505624	0.014059	0.0206095	0.0290794	0.030283	0.0206945	0.0236321	0.00103514	0.000784707	0.0192097	0.0285621	0.040175	0.0397328		0.00670405	0.0125059	0.018318
50.1961	0.00699845	0.00817386	0.000465406	0.00035996	0.0094348	0.0155886	0.0183849	0.0184613	0.0155195	0.0180973	0.000849038	0.000699388	0.0160818	0.0232497	0.0317834	0.033047	0.0239303	0.0269967	0.00141403	0.00108584	0.0220198	0.0322147	0.0439051	0.0433539		0.00776199	0.0144742	0.0211982
50.5882	0.00805164	0.00929513	0.00062919	0.000492636	0.010691	0.017508	0.0200279	0.0200834	0.0178486	0.0205707	0.00114846	0.000958	0.0183111	0.0261023	0.0346107	0.0359343	0.0275188	0.0306828	0.00191322	0.00148783	0.0251183	0.0361592	0.0478037	0.0471354		0.00893965	0.0166634	0.0244007
50.9804	0.00921301	0.0105169	0.000842624	0.000667742	0.0120659	0.0195702	0.0217382	0.021771	0.020414	0.0232632	0.00153875	0.00129947	0.020753	0.0291642	0.0375503	0.0389343	0.0314699	0.0346942	0.00256396	0.0020187	0.0285135	0.040391	0.0518557	0.0510627		0.0102419	0.0190819	0.0279375
51.3725	0.0104847	0.0118393	0.00111785	0.000896384	0.0135622	0.0217714	0.0235085	0.0235172	0.0232192	0.0261742	0.00204211	0.00174548	0.0234115	0.0324289	0.0405895	0.0420339	0.0357889	0.0390298	0.00340332	0.00271221	0.0322101	0.0449004	0.0560427	0.0551187		0.0116724	0.0217356	0.0318166
51.7647	0.0118673	0.013261	0.001469	0.00119172	0.0151817	0.0241052	0.0253306	0.0253142	0.0262644	0.0292996	0.00268442	0.00232175	0.0262877	0.0358863	0.043713	0.0452182	0.0404751	0.0436831	0.00447442	0.00360831	0.0362091	0.0496725	0.0603435	0.0592834		0.0132329	0.0246271	0.0360415
52.1569	0.0133595	0.0147789	0.00191228	0.00156907	0.0169242	0.0265628	0.0271951	0.0271531	0.0295451	0.0326313	0.00349526	0.00305816	0.0293798	0.039522	0.0469034	0.0484702	0.0455211	0.0486415	0.00582658	0.00475353	0.0405067	0.0546868	0.0647336	0.0635339		0.0149237	0.0277555	0.0406099
52.549	0.0149582	0.0163879	0.00246586	0.00204596	0.0187883	0.0291327	0.0290911	0.0290238	0.0330525	0.0361572	0.0045078	0.00398889	0.0326822	0.0433177	0.0501416	0.0517707	0.0509125	0.0538864	0.00751508	0.00620097	0.045094	0.059917	0.0691859	0.0678448		0.0167426	0.0311155	0.0455139
52.9412	0.016658	0.0180813	0.00314969	0.00264198	0.0207705	0.0318004	0.0310072	0.0309153	0.0367726	0.0398603	0.00575847	0.00515214	0.0361857	0.0472509	0.0534061	0.0550989	0.0566269	0.059392	0.00960056	0.00801002	0.0499568	0.0653309	0.0736705	0.0721882		0.0186853	0.0346978	0.0507385
53.3333	0.0184512	0.0198501	0.0039852	0.00337864	0.0228654	0.0345492	0.0329308	0.0328157	0.0406863	0.0437196	0.00728627	0.00658972	0.0398773	0.0512948	0.0566743	0.0584321	0.0626335	0.0651259	0.0121479	0.0102456	0.0550748	0.0708904	0.0781551	0.076534		0.020745	0.0384877	0.0562617
53.7255	0.020328	0.0216836	0.00499477	0.00427889	0.0250656	0.0373595	0.0348485	0.0347126	0.0447689	0.0477091	0.00913187	0.00834623	0.0437396	0.055419	0.0599218	0.0617466	0.0688934	0.0710489	0.0152248	0.012977	0.0604219	0.0765522	0.0826056	0.0808502		0.0229124	0.042466	0.0620541
54.1176	0.0222762	0.023569	0.00620103	0.00536655	0.0273616	0.0402094	0.0367465	0.0365928	0.0489904	0.0517985	0.0113363	0.0104678	0.0477511	0.0595894	0.0631232	0.0650172	0.0753588	0.0771149	0.0188992	0.0162757	0.0659658	0.0822676	0.0869861	0.0851032		0.0251754	0.046608	0.0680784
54.5098	0.0242813	0.0254919	0.00762599	0.00666554	0.029742	0.0430752	0.0386106	0.0384428	0.0533156	0.0559535	0.0139392	0.0130007	0.0518861	0.0637684	0.0662522	0.068218	0.0819742	0.0832716	0.0232369	0.0202134	0.0716682	0.0879835	0.0912596	0.0892586		0.0275195	0.050884	0.0742899
54.902	0.0263267	0.0274361	0.00928996	0.00819883	0.0321933	0.0459311	0.0404262	0.040249	0.0577045	0.0601356	0.016977	0.0159889	0.0561149	0.0679162	0.0692823	0.0713227	0.0886761	0.0894608	0.0282981	0.0248581	0.0774849	0.093643	0.0953884	0.0932808		0.0299273	0.0552596	0.0806366
55.2941	0.0283943	0.0293841	0.0112104	0.00998726	0.0347001	0.0487502	0.0421791	0.0419977	0.0621125	0.0643034	0.0204806	0.0194722	0.0604041	0.0719906	0.0721867	0.0743047	0.0953942	0.0956193	0.0341333	0.030271	0.0833665	0.0991862	0.0993346	0.0971344		0.0323796	0.0596955	0.0870596
55.6863	0.0304639	0.0313173	0.0134004	0.0120482	0.0372454	0.0515048	0.0438551	0.0436754	0.0664914	0.0684127	0.0244727	0.0234831	0.0647169	0.075948	0.0749391	0.077138	0.102053	0.10168	0.0407796	0.036502	0.0892583	0.104551	0.103061	0.100784		0.0348547	0.0641484	0.0934938
56.0784	0.0325147	0.0332165	0.0158676	0.0143939	0.0398107	0.0541667	0.0454406	0.0452693	0.0707903	0.0724174	0.0289656	0.0280441	0.0690137	0.0797444	0.0775139	0.0797969	0.108571	0.107573	0.0482559	0.0435851	0.0951018	0.109675	0.106531	0.104196		0.0373294	0.0685716	0.0998691
56.4706	0.0345247	0.0350619	0.0186125	0.0170305	0.0423763	0.056708	0.0469229	0.046767	0.0749564	0.0762705	0.0339583	0.0331645	0.0732524	0.0833362	0.079887	0.0822572	0.114865	0.113227	0.0565588	0.0515336	0.100835	0.114496	0.10971	0.107336		0.0397791	0.0729159	0.106111
56.8627	0.0364719	0.0368339	0.0216275	0.0199558	0.0449215	0.0591017	0.0482901	0.0481572	0.0789358	0.0799248	0.0394342	0.0388378	0.0773895	0.0866807	0.0820354	0.084496	0.12085	0.118569	0.065659	0.0603356	0.106394	0.118953	0.112565	0.110175		0.0421785	0.0771299	0.112143
57.2549	0.0383345	0.0385136	0.0248957	0.0231585	0.0474255	0.0613223	0.0495319	0.0494296	0.0826756	0.0833342	0.0453593	0.0450387	0.0813808	0.0897375	0.0839386	0.0864921	0.126443	0.12353	0.0754971	0.06995	0.111714	0.122989	0.115066	0.112682		0.0445017	0.0811621	0.117887
57.6471	0.0400915	0.0400828	0.0283902	0.0266172	0.049867	0.0633461	0.0506392	0.0505753	0.0861242	0.0864544	0.051681	0.0517214	0.0851818	0.0924691	0.0855783	0.0882268	0.131561	0.128041	0.0859825	0.0803031	0.11673	0.126549	0.117188	0.114833		0.0467235	0.0849608	0.123266
58.0392	0.0417233	0.0415248	0.0320737	0.0302996	0.0522252	0.0651521	0.0516044	0.0515868	0.089233	0.0892441	0.0583269	0.0588179	0.0887491	0.094842	0.086939	0.089684	0.136128	0.132039	0.0969912	0.0912869	0.121377	0.129585	0.118906	0.116605		0.0488193	0.0884764	0.128204
58.4314	0.043212	0.0428249	0.035899	0.034162	0.0544801	0.0667223	0.0524222	0.0524585	0.0919577	0.0916662	0.0652057	0.0662382	0.0920414	0.0968271	0.0880082	0.0908503	0.140072	0.135467	0.108367	0.102758	0.125596	0.132056	0.120203	0.11798		0.0507661	0.0916618	0.13263
58.8235	0.0445424	0.0439705	0.0398092	0.0381503	0.0566127	0.0680424	0.0530887	0.0531863	0.0942592	0.093688	0.0722083	0.0738705	0.0950196	0.0984007	0.0887767	0.0917155	0.143332	0.138275	0.119924	0.114539	0.12933	0.133926	0.121064	0.118942		0.0525432	0.0944736	0.136478
59.2157	0.0457019	0.0449518	0.0437395	0.0422009	0.0586058	0.0691017	0.0536025	0.0537681	0.0961049	0.0952831	0.07921	0.0815835	0.0976487	0.0995449	0.0892387	0.0922727	0.145855	0.14042	0.131449	0.126422	0.132527	0.135169	0.121479	0.119482		0.0541324	0.0968737	0.139691
59.6078	0.0466812	0.0457618	0.0476188	0.0462419	0.0604441	0.0698939	0.053964	0.0542037	0.0974695	0.0964309	0.0860742	0.0892296	0.0998976	0.100248	0.0893921	0.0925183	0.1476	0.141871	0.14271	0.138172	0.135143	0.135769	0.121444	0.119593		0.0555186	0.0988299	0.142218
60	0.0474747	0.0463967	0.051372	0.0501959	0.0621143	0.070417	0.0541758	0.0544949	0.0983356	0.097118	0.0926565	0.0966493	0.101741	0.100506	0.0892383	0.0924525	0.148538	0.142605	0.153458	0.149538	0.13714	0.135716	0.120959	0.119275		0.0566905	0.100317	0.14402
60.3922	0.0480802	0.046856	0.0549231	0.0539823	0.0636061	0.0706732	0.0542428	0.0546454	0.0986945	0.0973384	0.0988102	0.103677	0.103158	0.10032	0.0887823	0.0920788	0.148654	0.142611	0.163445	0.160255	0.138491	0.135011	0.12003	0.118531		0.0576406	0.101316	0.145069
60.7843	0.0484996	0.0471425	0.058198	0.057521	0.0649118	0.0706693	0.0541715	0.0546609	0.0985459	0.0970933	0.104391	0.110146	0.104135	0.0996977	0.0880328	0.0914043	0.147944	0.14189	0.172423	0.170061	0.139174	0.133667	0.118667	0.117369		0.0583658	0.101819	0.145348
61.1765	0.0487385	0.0472626	0.0611276	0.0607353	0.0660265	0.0704163	0.0539708	0.0545489	0.0978988	0.0963915	0.109266	0.115898	0.104664	0.0986555	0.0870017	0.0904391	0.146423	0.140451	0.180162	0.178701	0.139181	0.131701	0.116885	0.115801		0.0588672	0.101822	0.144853
61.5686	0.0488061	0.0472257	0.0636513	0.0635559	0.0669486	0.0699291	0.053651	0.0543186	0.0967702	0.095249	0.113314	0.120786	0.104745	0.097214	0.0857042	0.089197	0.144113	0.138317	0.186454	0.185944	0.138511	0.129143	0.114703	0.113844		0.0591502	0.101333	0.143591
61.9608	0.0487153	0.0470441	0.0657197	0.0659238	0.0676793	0.0692261	0.0532242	0.0539805	0.0951856	0.0936886	0.116436	0.124685	0.104384	0.0954001	0.0841584	0.0876944	0.141054	0.13552	0.191128	0.191587	0.137174	0.126029	0.112145	0.111518		0.0592244	0.100367	0.141583
62.3529	0.0484819	0.0467332	0.0672972	0.0677933	0.0682228	0.0683291	0.0527039	0.0535469	0.0931778	0.0917396	0.118558	0.127497	0.103592	0.0932455	0.0823849	0.0859503	0.137295	0.132102	0.194053	0.195471	0.135189	0.122403	0.109237	0.108848		0.0591034	0.0989465	0.13886
62.7451	0.0481247	0.0463107	0.0683637	0.0691349	0.068586	0.0672624	0.0521047	0.053031	0.0907861	0.0894367	0.119636	0.129152	0.102388	0.0907863	0.0804065	0.0839861	0.132895	0.128112	0.195146	0.197483	0.132585	0.118314	0.106011	0.10586		0.0588045	0.097101	0.135465
63.1373	0.0476645	0.0457962	0.0689159	0.0699362	0.0687786	0.0660523	0.0514422	0.0524469	0.0880555	0.0868194	0.119653	0.129616	0.100797	0.0880621	0.0782479	0.0818253	0.127924	0.123609	0.194376	0.197564	0.129399	0.113818	0.102499	0.102585		0.0583483	0.0948672	0.131451
63.5294	0.047124	0.045211	0.0689678	0.0702033	0.0688122	0.0647269	0.0507325	0.0518095	0.0850351	0.0839312	0.118628	0.128892	0.0988459	0.085115	0.0759353	0.0794927	0.122455	0.118656	0.191764	0.195711	0.125676	0.108973	0.0987364	0.099055		0.0577577	0.0922868	0.126877
63.9216	0.0465268	0.0445773	0.0685501	0.0699607	0.0687007	0.0633148	0.0499922	0.0511341	0.0817772	0.0808181	0.116608	0.127018	0.0965698	0.0819886	0.0734957	0.0770144	0.116571	0.113319	0.187385	0.19198	0.121466	0.103841	0.0947594	0.0953027		0.0570579	0.089406	0.121811
64.3137	0.0458975	0.0439182	0.0677089	0.06925	0.0684592	0.061845	0.0492378	0.0504361	0.0783361	0.0775283	0.113671	0.124067	0.0940054	0.0787275	0.0709567	0.0744173	0.110355	0.10767	0.181362	0.186477	0.116827	0.0984833	0.0906058	0.0913635		0.0562757	0.0862745	0.116326
64.7059	0.0452602	0.0432564	0.0665039	0.0681283	0.0681042	0.0603462	0.0484859	0.049731	0.0747665	0.0741105	0.10992	0.120142	0.0911925	0.0753759	0.0683459	0.0717283	0.103891	0.101781	0.173861	0.179361	0.111818	0.0929635	0.0863133	0.0872728		0.0554385	0.082944	0.110498
65.098	0.0446386	0.0426146	0.0650057	0.0666657	0.0676529	0.0588459	0.0477523	0.0490337	0.0711225	0.070613	0.105477	0.115373	0.0881726	0.0719769	0.0656906	0.0689747	0.0972635	0.095722	0.165081	0.170828	0.106504	0.0873428	0.0819195	0.083066		0.0545737	0.0794672	0.104405
65.4902	0.0440553	0.0420145	0.0632927	0.0649422	0.0671226	0.0573703	0.0470522	0.0483586	0.0674562	0.067083	0.100482	0.109911	0.0849884	0.0685721	0.0630175	0.0661828	0.0905542	0.0895646	0.155252	0.16111	0.100949	0.0816805	0.0774614	0.0787783		0.0537083	0.0758964	0.0981236
65.8824	0.0435312	0.0414762	0.0614479	0.0630438	0.0665307	0.0559434	0.0463998	0.0477194	0.0638171	0.0635656	0.0950825	0.10392	0.0816824	0.0652002	0.060352	0.0633784	0.0838405	0.0833754	0.144618	0.150458	0.095218	0.0760326	0.0729745	0.0744437		0.0528683	0.0722826	0.0917312
66.2745	0.0430853	0.0410186	0.0595557	0.0610594	0.065894	0.0545869	0.0458081	0.0471287	0.0602508	0.0601028	0.0894304	0.0975692	0.0782965	0.061897	0.057718	0.0605858	0.0771942	0.0772177	0.133428	0.139137	0.0893761	0.0704512	0.0684929	0.0700952		0.0520776	0.0686744	0.0853006
66.6667	0.0427339	0.0406581	0.0576979	0.0590768	0.0652285	0.0533198	0.0452887	0.0465977	0.0567985	0.0567334	0.0836747	0.0910293	0.0748708	0.0586944	0.0551379	0.057828	0.0706809	0.0711497	0.121932	0.127408	0.0834846	0.0649837	0.0640484	0.0657638		0.0513582	0.0651172	0.0789006
67.0588	0.0424912	0.0404091	0.0559515	0.0571795	0.0645489	0.0521582	0.0448517	0.0461366	0.0534961	0.0534915	0.0779566	0.0844635	0.0714433	0.0556205	0.0526318	0.0551262	0.0643585	0.0652239	0.110365	0.115527	0.0776024	0.059672	0.0596704	0.0614787		0.0507293	0.0616524	0.0725947
67.451	0.042368	0.0402832	0.0543857	0.0554435	0.0638685	0.0511147	0.0445054	0.0457537	0.0503742	0.0504072	0.0724051	0.0780225	0.0680491	0.052699	0.0502178	0.0524995	0.0582769	0.0594864	0.0989432	0.103729	0.0717838	0.0545528	0.0553857	0.0572665		0.0502073	0.0583164	0.0664398
67.8431	0.0423726	0.0402896	0.0530598	0.0539352	0.063199	0.0501991	0.0442565	0.0454559	0.0474579	0.0475055	0.0671327	0.0718401	0.0647199	0.0499492	0.0479115	0.049965	0.0524774	0.0539767	0.0878586	0.0922253	0.0660787	0.0496567	0.0512183	0.0531514		0.0498052	0.0551408	0.0604859
68.2353	0.0425102	0.0404347	0.0520218	0.0527091	0.0625502	0.0494177	0.0441096	0.0452484	0.0447663	0.0448066	0.0622335	0.0660295	0.0614838	0.047386	0.0457263	0.0475375	0.0469932	0.0487273	0.0772727	0.0811951	0.0605312	0.0450084	0.0471889	0.049155		0.0495327	0.0521518	0.0547755
68.6275	0.042783	0.0407221	0.0513074	0.0518072	0.06193	0.0487737	0.0440677	0.0451346	0.0423129	0.0423257	0.0577809	0.0606813	0.0583648	0.0450198	0.0436728	0.0452291	0.0418489	0.0437638	0.0673148	0.0707848	0.0551798	0.040627	0.0433155	0.0452959		0.0493962	0.0493699	0.0493436
69.0196	0.0431905	0.0411527	0.0509398	0.0512577	0.0613445	0.0482672	0.0441316	0.0451162	0.0401058	0.0400733	0.053828	0.0558627	0.0553828	0.0428569	0.0417592	0.0430501	0.0370612	0.0391053	0.0580816	0.0611057	0.0500569	0.0365258	0.0396128	0.04159		0.0493985	0.0468103	0.0442175
69.4118	0.0437295	0.0417249	0.0509296	0.0510761	0.0607975	0.0478955	0.0443006	0.0451932	0.0381483	0.0380553	0.050407	0.0516176	0.0525535	0.0408996	0.0399911	0.0410078	0.0326393	0.0347643	0.0496374	0.0522341	0.0451889	0.032713	0.0360924	0.0380503		0.0495392	0.0444826	0.0394171
69.8039	0.0443945	0.0424344	0.0512758	0.0512648	0.0602913	0.0476534	0.0445719	0.0453638	0.0364386	0.036273	0.0475314	0.0479676	0.0498888	0.0391465	0.038372	0.0391077	0.0285856	0.0307474	0.0420168	0.0442137	0.0405959	0.0291919	0.032763	0.0346869		0.0498149	0.0423916	0.0349552
70.1961	0.0451777	0.0432749	0.0519669	0.0518148	0.0598261	0.047533	0.0449413	0.0456247	0.0349711	0.0347242	0.0451973	0.0449147	0.0473963	0.037593	0.0369029	0.0373527	0.0248967	0.0270559	0.0352273	0.0370588	0.0362924	0.0259613	0.0296305	0.0315073		0.0502191	0.0405372	0.0308381
70.5882	0.0460692	0.0442377	0.0529816	0.0527065	0.0594005	0.0475248	0.0454026	0.045971	0.0337366	0.0334028	0.0433858	0.0424431	0.0450802	0.0362315	0.0355825	0.0357436	0.0215636	0.023686	0.0292536	0.0307579	0.0322873	0.0230162	0.0266983	0.0285164		0.0507429	0.038915	0.0270662
70.9804	0.0470579	0.0453124	0.0542908	0.053912	0.0590119	0.0476172	0.0459486	0.0463965	0.0327228	0.0322998	0.0420658	0.0405227	0.0429412	0.0350521	0.034408	0.0342794	0.0185733	0.02063	0.0240615	0.0252785	0.0285846	0.0203484	0.0239672	0.0257169		0.0513748	0.0375171	0.0236348
71.3725	0.048131	0.046487	0.0558591	0.055396	0.058656	0.0477975	0.0465704	0.0468936	0.031915	0.0314035	0.0411966	0.0391119	0.0409769	0.0340426	0.0333743	0.0329571	0.0159089	0.0178765	0.0196024	0.0205721	0.0251834	0.0179467	0.0214357	0.0231089		0.0521018	0.036332	0.0205344
71.7647	0.0492746	0.047748	0.0576462	0.0571177	0.0583277	0.0480517	0.0472582	0.0474537	0.0312966	0.0307002	0.0407304	0.038161	0.0391824	0.0331895	0.032475	0.0317722	0.0135513	0.0154115	0.0158175	0.0165782	0.0220791	0.0157978	0.0191006	0.0206909		0.0529089	0.035346	0.0177521
72.1569	0.0504743	0.0490811	0.0596083	0.0590328	0.058021	0.0483654	0.0480011	0.0480671	0.0308497	0.0301743	0.0406147	0.0376144	0.0375504	0.032478	0.0317023	0.0307187	0.011479	0.0132186	0.0126418	0.0132289	0.0192633	0.0138866	0.0169568	0.0184594		0.05378	0.0345428	0.0152717
72.549	0.051715	0.0504706	0.0616998	0.0610945	0.0577292	0.0487233	0.0487874	0.0487233	0.0305554	0.0298091	0.040795	0.037414	0.0360721	0.0318924	0.0310473	0.0297892	0.00966979	0.0112798	0.0100075	0.0104531	0.0167249	0.0121969	0.0149979	0.0164095		0.0546981	0.033905	0.0130751
72.9412	0.0529813	0.0519007	0.063874	0.0632548	0.0574452	0.0491104	0.0496049	0.0494114	0.0303947	0.0295872	0.0412161	0.0375007	0.0347367	0.0314168	0.0305002	0.0289757	0.00810056	0.00957624	0.00784662	0.0081789	0.0144504	0.0107118	0.0132161	0.0145348		0.0556457	0.0334137	0.0111424
73.3333	0.0542578	0.053355	0.0660848	0.0654664	0.0571617	0.0495115	0.0504408	0.0501196	0.0303483	0.0294904	0.041824	0.0378168	0.0335329	0.031035	0.0300502	0.0282689	0.00674837	0.00808847	0.00609374	0.00633689	0.0124245	0.00941397	0.0116028	0.0128282		0.0566051	0.0330497	0.00945268
73.7255	0.0555293	0.0548169	0.0682872	0.0676825	0.0568712	0.0499119	0.0512821	0.0508362	0.0303974	0.0295007	0.0425669	0.0383068	0.0324484	0.0307312	0.0296864	0.0276592	0.00559074	0.00679697	0.00468735	0.00486171	0.0106306	0.00828607	0.0101488	0.0112812		0.0575587	0.0327937	0.00798485
74.1176	0.056781	0.0562699	0.0704381	0.0698588	0.0565667	0.0502976	0.0521159	0.0515492	0.0305235	0.0296001	0.0433966	0.0389191	0.0314707	0.0304899	0.0293975	0.0271365	0.00460602	0.00568253	0.00357121	0.00369345	0.00905157	0.00731116	0.00884408	0.00988527		0.0584891	0.0326263	0.00671774
74.5098	0.0579984	0.0576979	0.072497	0.0719531	0.056241	0.0506552	0.0529292	0.0522467	0.0307094	0.0297713	0.0442685	0.0396063	0.0305871	0.0302965	0.0291718	0.0266903	0.00377371	0.00472656	0.00269492	0.00277847	0.00766959	0.00647286	0.00767855	0.00863094		0.0593797	0.0325289	0.00563068
74.902	0.0591679	0.0590851	0.0744264	0.0739267	0.0558877	0.0509722	0.0537093	0.0529169	0.0309386	0.0299974	0.0451424	0.0403256	0.0297853	0.0301369	0.0289981	0.0263103	0.00307467	0.00391134	0.00201427	0.00206972	0.00646701	0.00575556	0.00664192	0.00750873		0.0602146	0.0324837	0.00470381
75.2941	0.0602766	0.0604163	0.0761921	0.0757441	0.0555008	0.0512372	0.054444	0.0535485	0.0311957	0.0302624	0.0459825	0.0410392	0.0290532	0.0299983	0.0288652	0.025986	0.00249123	0.00322021	0.0014912	0.00152668	0.00542648	0.00514459	0.00572396	0.00650899		0.0609792	0.0324739	0.00391831
75.6863	0.0613123	0.0616769	0.0777639	0.0773735	0.055075	0.0514401	0.0551218	0.0541306	0.0314667	0.0305513	0.0467578	0.0417142	0.0283794	0.0298688	0.0287622	0.0257074	0.00200731	0.00263766	0.00109344	0.0011151	0.00453123	0.0046263	0.00491459	0.0056221		0.0616597	0.0324839	0.00325661
76.0784	0.062264	0.0628535	0.079115	0.0787872	0.0546056	0.0515717	0.0557315	0.0546529	0.0317387	0.0308502	0.0474414	0.0423226	0.0277534	0.0297379	0.0286787	0.0254645	0.00160843	0.00214947	0.000794139	0.000806513	0.00376527	0.00418813	0.00420403	0.00483863		0.0622438	0.0324995	0.00270249
76.4706	0.0631215	0.0639334	0.0802229	0.0799615	0.0540886	0.0516243	0.0562632	0.0551058	0.0320002	0.0311464	0.0480112	0.0428407	0.0271652	0.029596	0.0286052	0.0252482	0.00128167	0.0017427	0.000571271	0.000577617	0.00311358	0.00381867	0.00358289	0.0041494		0.0627207	0.0325076	0.00224113
76.8627	0.0638757	0.0649051	0.0810692	0.0808768	0.0535208	0.0515915	0.0567076	0.0554805	0.0322409	0.0314281	0.0484488	0.0432494	0.0266061	0.029435	0.0285324	0.0250496	0.00101564	0.00140569	0.000407034	0.000409638	0.00256217	0.00350762	0.00304221	0.00354557		0.063081	0.0324971	0.00185919
77.2549	0.0645188	0.0657582	0.0816395	0.0815177	0.0528998	0.051468	0.0570565	0.0557694	0.032452	0.0316851	0.04874	0.0435336	0.026068	0.0292478	0.028452	0.0248605	0.00080036	0.00112807	0.000287251	0.000287667	0.00209815	0.00324581	0.00257355	0.00301874		0.0633167	0.032458	0.00154472
77.6471	0.0650438	0.0664835	0.0819234	0.081873	0.052224	0.0512501	0.0573027	0.0559654	0.0326257	0.0319081	0.0488742	0.0436818	0.025544	0.0290286	0.0283566	0.0246734	0.000627218	0.000900653	0.000200788	0.000200038	0.00170982	0.00302512	0.00216903	0.00256097		0.0634215	0.0323817	0.00128715
78.0392	0.0654451	0.0670732	0.0819148	0.0819354	0.0514924	0.050935	0.0574404	0.0560629	0.0327554	0.0320892	0.0488441	0.0436859	0.0250281	0.0287727	0.0282394	0.0244816	0.000488807	0.000715414	0.000139013	0.000137741	0.00138659	0.00283843	0.00182131	0.00216481		0.0633906	0.0322615	0.00107725
78.4314	0.0657181	0.0675205	0.0816115	0.0817018	0.0507049	0.0505214	0.0574646	0.056057	0.0328356	0.0322216	0.0486457	0.043541	0.0245152	0.0284764	0.0280947	0.0242791	0.000378829	0.000565372	9.53268e-05	9.39176e-05	0.00111899	0.00267958	0.00152368	0.00182337		0.0632209	0.0320915	0.000906961
78.8235	0.0658593	0.0678204	0.0810149	0.0811731	0.0498619	0.050009	0.0573718	0.055944	0.0328621	0.0322997	0.0482781	0.0432453	0.0240011	0.0281374	0.0279174	0.0240606	0.000291968	0.000444517	6.47469e-05	6.34105e-05	0.000898648	0.00254328	0.00126996	0.00153028		0.0629107	0.0318675	0.000769364
79.2157	0.0658664	0.0679688	0.0801304	0.0803536	0.0489646	0.0493988	0.0571596	0.0557216	0.0328313	0.0323188	0.0477427	0.0427992	0.0234824	0.0277538	0.0277035	0.0238217	0.000223776	0.000347713	4.35578e-05	4.23942e-05	0.000718184	0.00242499	0.00105457	0.00127968		0.0624597	0.0315864	0.00065855
79.6078	0.0657383	0.0679632	0.0789666	0.0792514	0.0480147	0.0486926	0.0568266	0.0553881	0.0327409	0.0322755	0.0470436	0.0422057	0.0229565	0.0273251	0.0274498	0.0235586	0.00017056	0.000270601	2.90239e-05	2.80661e-05	0.000571169	0.00232093	0.000872463	0.00106628		0.061869	0.0312463	0.000569516
80	0.0654747	0.0678025	0.0775354	0.0778777	0.0470144	0.0478934	0.056373	0.0549433	0.0325892	0.0321673	0.0461872	0.0414698	0.0224217	0.0268513	0.0271538	0.0232683	0.000129279	0.000209515	1.91553e-05	1.83988e-05	0.00045204	0.00222793	0.000719131	0.000885284		0.0611413	0.0308465	0.000498062
80.3922	0.0650766	0.0674866	0.0758515	0.0762468	0.0459664	0.0470048	0.0557996	0.0543878	0.0323754	0.0319926	0.0451816	0.0405985	0.0218765	0.0263332	0.0268139	0.0229488	9.74463e-05	0.000161391	1.25217e-05	1.19434e-05	0.000356018	0.00214336	0.000590551	0.00073237		0.0602803	0.0303869	0.000440691
80.7843	0.0645459	0.067017	0.0739324	0.0743757	0.0448739	0.0460314	0.0551089	0.0537235	0.0320995	0.0317507	0.0440369	0.0396003	0.0213203	0.0257722	0.0264295	0.0225983	7.30447e-05	0.000123686	8.10743e-06	7.67707e-06	0.00027903	0.00206511	0.000483164	0.000603694		0.0592909	0.0298687	0.000394513
81.1765	0.0638854	0.0663962	0.0717977	0.0722835	0.0437402	0.0449783	0.0543039	0.0529529	0.031762	0.0314417	0.0427643	0.0384852	0.020753	0.0251705	0.0260002	0.022216	5.44501e-05	9.4306e-05	5.1993e-06	4.88647e-06	0.000217627	0.00199148	0.00039384	0.000495841		0.058179	0.0292936	0.000357164
81.5686	0.0630987	0.0656281	0.069469	0.0699917	0.0425692	0.0438515	0.0533889	0.0520797	0.0313642	0.0310665	0.0413765	0.0372642	0.0201747	0.0245305	0.0255267	0.0218017	4.0364e-05	7.15378e-05	3.30256e-06	3.07982e-06	0.000168911	0.00192113	0.000319841	0.000405794		0.0569517	0.0286642	0.000326721
81.9608	0.0621906	0.0647174	0.0669691	0.067523	0.0413649	0.0426572	0.0523689	0.0511084	0.0309077	0.0306267	0.0398872	0.0359494	0.0195862	0.0238551	0.0250102	0.0213556	2.97561e-05	5.39894e-05	2.07777e-06	1.92215e-06	0.000130462	0.00185301	0.000258783	0.000330909		0.0556166	0.0279835	0.000301636
82.3529	0.0611663	0.06367	0.0643224	0.0649015	0.0401315	0.0414021	0.0512499	0.0500441	0.0303949	0.0301244	0.0383104	0.0345534	0.0189883	0.0231477	0.0244524	0.0208786	2.18145e-05	4.05377e-05	1.29476e-06	1.1879e-06	0.000100276	0.00178637	0.000208606	0.000268874		0.0541823	0.0272553	0.000280675
82.7451	0.0600318	0.0624929	0.0615534	0.062152	0.0388732	0.0400934	0.0500385	0.0488927	0.0298284	0.0295625	0.0366611	0.0330893	0.0183821	0.0224117	0.0238554	0.0203719	1.59037e-05	3.02822e-05	7.99141e-07	7.26947e-07	7.66991e-05	0.00172064	0.000167535	0.000217685		0.0526578	0.0264835	0.00026286
83.1373	0.0587939	0.0611937	0.0586875	0.0592997	0.0375944	0.0387381	0.0487418	0.0476608	0.0292112	0.0289441	0.034954	0.0315707	0.0177691	0.0216509	0.0232219	0.0198372	1.15303e-05	2.25057e-05	4.88541e-07	4.40511e-07	5.83805e-05	0.00165544	0.000134051	0.000175609		0.0510527	0.0256725	0.000247427
83.5294	0.0574597	0.0597807	0.0557496	0.0563699	0.0362996	0.0373439	0.0473677	0.0463553	0.0285469	0.028273	0.0332042	0.0300108	0.0171507	0.0208692	0.022555	0.0192764	8.31318e-06	1.66408e-05	2.95815e-07	2.64327e-07	4.4221e-05	0.00159054	0.000106863	0.000141157		0.0493769	0.024827	0.000233783
83.9216	0.056037	0.0582631	0.0527644	0.0533874	0.0349933	0.035918	0.0459244	0.0449837	0.027839	0.0275531	0.0314261	0.0284229	0.0165286	0.0200705	0.0218579	0.018692	5.96047e-06	1.22415e-05	1.77412e-07	1.57057e-07	3.33328e-05	0.0015258	8.48728e-05	0.000113057		0.0476406	0.023952	0.000221474
84.3137	0.0545338	0.0566506	0.0497556	0.0503764	0.0336798	0.0344681	0.0444203	0.0435536	0.0270914	0.026789	0.0296341	0.0268199	0.0159044	0.0192589	0.0211342	0.0180865	4.24992e-06	8.95927e-06	1.05388e-07	9.2407e-08	2.50034e-05	0.00146121	6.71583e-05	9.02258e-05		0.045854	0.0230522	0.00021016
84.7059	0.0529585	0.054953	0.0467462	0.0473602	0.0323633	0.0330014	0.0428642	0.0420732	0.0263083	0.0259851	0.0278417	0.025214	0.0152799	0.0184384	0.0203876	0.0174627	3.01347e-06	6.5236e-06	6.20069e-08	5.38372e-08	1.86642e-05	0.00139679	5.29443e-05	7.17468e-05		0.0440275	0.0221329	0.000199586
85.098	0.0513198	0.0531809	0.0437576	0.0443604	0.0310481	0.0315252	0.041265	0.0405504	0.0254938	0.0251463	0.0260617	0.023617	0.0146568	0.0176128	0.019622	0.0168235	2.1249e-06	4.72584e-06	3.61353e-08	3.10593e-08	1.38644e-05	0.00133265	4.1584e-05	5.68477e-05		0.0421712	0.0211989	0.000189568
85.4902	0.0496265	0.0513447	0.0408096	0.0413976	0.0297382	0.0300463	0.0396315	0.0389935	0.0246523	0.0242775	0.0243059	0.0220396	0.0140369	0.016786	0.0188414	0.0161718	1.49004e-06	3.40603e-06	2.08578e-08	1.77432e-08	1.02489e-05	0.00126891	3.25404e-05	4.4881e-05		0.0402953	0.0202553	0.000179974
85.8824	0.0478873	0.0494553	0.0379206	0.0384903	0.0284375	0.0285714	0.0379725	0.0374106	0.0237882	0.0233836	0.0225852	0.0204918	0.0134217	0.0159616	0.0180496	0.0155108	1.03906e-06	2.44228e-06	1.19247e-08	1.00369e-08	7.53941e-06	0.00120573	2.53692e-05	3.53061e-05		0.0384094	0.0193069	0.000170714
86.2745	0.0461112	0.0475231	0.0351067	0.0356554	0.0271496	0.027107	0.0362967	0.0358097	0.0229058	0.0224698	0.0209093	0.0189825	0.012813	0.0151432	0.0172507	0.0148434	7.20565e-07	1.74229e-06	6.75254e-09	5.62216e-09	5.51925e-06	0.00114327	1.97051e-05	2.76743e-05		0.0365229	0.0183583	0.00016173
86.6667	0.0443068	0.0455589	0.0323822	0.0329075	0.0258781	0.0256589	0.0346126	0.0341987	0.0220094	0.0215408	0.0192866	0.0175196	0.0122122	0.014334	0.0164484	0.0141729	4.96925e-07	1.23658e-06	3.78732e-09	3.11842e-09	4.02074e-06	0.00108172	1.52489e-05	2.16143e-05		0.0346447	0.0174141	0.000152987
87.0588	0.0424828	0.043573	0.0297596	0.0302595	0.024626	0.0242326	0.0329282	0.0325853	0.0211032	0.0206017	0.0177246	0.0161098	0.0116209	0.0135371	0.0156465	0.013502	3.40796e-07	8.73173e-07	2.10397e-09	1.71277e-09	2.91484e-06	0.00102125	1.17567e-05	1.68207e-05		0.0327834	0.0164783	0.000144465
87.451	0.0406476	0.0415755	0.0272489	0.0277221	0.0233966	0.0228334	0.0312515	0.0309766	0.0201915	0.0196571	0.0162292	0.0147589	0.0110404	0.0127554	0.0148487	0.0128337	2.32426e-07	6.13418e-07	1.15768e-09	9.31521e-10	2.10284e-06	0.00096203	9.03075e-06	1.30433e-05		0.0309467	0.015555	0.000136158
87.8431	0.0388092	0.039576	0.0248584	0.0253039	0.0221924	0.0214659	0.0295896	0.0293797	0.0192783	0.0187117	0.0148055	0.0134715	0.0104719	0.0119913	0.0140582	0.0121708	1.57638e-07	4.28736e-07	6.30934e-10	5.0167e-10	1.50967e-06	0.000904233	6.91112e-06	1.00778e-05		0.029142	0.0146479	0.000128069
88.2353	0.0369755	0.037584	0.0225944	0.0230115	0.021016	0.0201341	0.0279494	0.027801	0.0183674	0.0177698	0.0134571	0.0122511	0.00991659	0.0112473	0.0132783	0.0115157	1.06322e-07	2.98127e-07	3.40581e-10	2.67531e-10	1.07855e-06	0.000848006	5.2694e-06	7.75864e-06		0.0273759	0.0137601	0.000120203
88.6275	0.0351537	0.0356082	0.0204612	0.0208497	0.0198696	0.0188418	0.0263374	0.0262466	0.0174624	0.0168356	0.0121866	0.0111002	0.00937553	0.0105254	0.0125119	0.0108711	7.13135e-08	2.06248e-07	1.82096e-10	1.41274e-10	7.66798e-07	0.000793488	4.00279e-06	5.95173e-06		0.0256544	0.0128948	0.000112572
89.0196	0.0333508	0.0336567	0.0184614	0.0188214	0.0187553	0.0175922	0.0247594	0.0247221	0.0165668	0.0159129	0.0109955	0.0100203	0.00884963	0.00982726	0.0117619	0.010239	4.75671e-08	1.41956e-07	9.64324e-11	7.38718e-11	5.42507e-07	0.000740798	3.02937e-06	4.54924e-06		0.0239828	0.0120545	0.000105187
89.4118	0.0315733	0.0317372	0.0165959	0.0169278	0.0176747	0.0163879	0.0232205	0.0232325	0.0156838	0.0150053	0.00988437	0.00901217	0.00833967	0.0091545	0.0110305	0.0096216	3.15521e-08	9.7207e-08	5.05812e-11	3.82496e-11	3.81956e-07	0.000690041	2.28418e-06	3.46477e-06		0.0223656	0.0112417	9.80602e-05
89.8039	0.0298272	0.0298567	0.0148641	0.0151686	0.0166292	0.0152311	0.0217254	0.0217824	0.0148164	0.0141162	0.00885293	0.0080756	0.00784635	0.00850831	0.0103201	0.00902068	2.0813e-08	6.62244e-08	2.62783e-11	1.96113e-11	2.67611e-07	0.000641303	1.71591e-06	2.62934e-06		0.0208069	0.0104582	9.12026e-05
90.1961	0.0281179	0.0280214	0.0132641	0.0135422	0.0156202	0.0141237	0.0202782	0.0203757	0.0139674	0.0132485	0.00790001	0.0072097	0.00737022	0.00788967	0.00963248	0.00843787	1.3653e-08	4.48865e-08	1.35223e-11	9.95675e-12	1.86586e-07	0.000594652	1.28425e-06	1.98819e-06		0.0193097	0.00970566	8.46244e-05
90.5882	0.0264504	0.026237	0.0117929	0.0120456	0.0146486	0.0130668	0.0188823	0.019016	0.013139	0.0124048	0.00702377	0.00641293	0.00691174	0.00729929	0.0089693	0.00787458	8.90654e-09	3.02685e-08	6.89199e-12	5.00563e-12	1.2946e-07	0.00055014	9.57617e-07	1.49799e-06		0.0178768	0.00898541	7.83339e-05
90.9804	0.024829	0.0245083	0.0104464	0.0106749	0.013715	0.0120614	0.0175407	0.0177061	0.0123336	0.0115875	0.0062218	0.0056832	0.00647125	0.00673765	0.00833192	0.007332	5.77797e-09	2.03069e-08	3.47923e-12	2.4919e-12	8.93872e-08	0.0005078	7.11414e-07	1.1246e-06		0.01651	0.00829842	7.23376e-05
91.3725	0.0232576	0.0228395	0.00921967	0.00942534	0.0128201	0.0111079	0.0162556	0.0164485	0.0115531	0.0107985	0.00549116	0.00501795	0.00604899	0.00620502	0.00772142	0.00681109	3.72759e-09	1.35542e-08	1.73966e-12	1.22839e-12	6.14185e-08	0.00046765	5.26551e-07	8.4125e-07		0.0152107	0.00764533	6.66399e-05
91.7647	0.0217395	0.0212343	0.00810711	0.00829139	0.0119641	0.0102064	0.0150288	0.0152449	0.010799	0.0100395	0.00482853	0.00441424	0.00564509	0.00570143	0.00713863	0.00631263	2.39148e-09	9.00078e-09	8.61565e-13	5.9961e-13	4.19958e-08	0.000429692	3.88282e-07	6.27034e-07		0.0139795	0.00702654	6.12431e-05
92.1569	0.0202774	0.0196953	0.00710264	0.00726699	0.0111472	0.00935667	0.0138615	0.0140969	0.0100727	0.0093119	0.00423028	0.00386886	0.0052596	0.00522674	0.00658412	0.00583718	1.52578e-09	5.94654e-09	4.22625e-13	2.89824e-13	2.85756e-08	0.000393913	2.85261e-07	4.65689e-07		0.0128169	0.00644215	5.61474e-05
92.549	0.0188736	0.0182248	0.00619977	0.00634568	0.0103691	0.00855805	0.0127544	0.0130053	0.00937531	0.00861666	0.00369254	0.00337837	0.00489247	0.00478062	0.00605823	0.00538511	9.68063e-10	3.90865e-09	2.05336e-13	1.38717e-13	1.93494e-08	0.000360289	2.08798e-07	3.44618e-07		0.0117224	0.00589201	5.13513e-05
92.9412	0.0175297	0.0168244	0.0053918	0.00552076	0.00962961	0.0078097	0.0117078	0.0119705	0.00870774	0.00795454	0.00321132	0.00293919	0.00454357	0.00436258	0.00556107	0.00495661	6.10803e-10	2.55603e-09	9.8814e-14	6.57441e-14	1.30384e-08	0.000328782	1.52264e-07	2.54109e-07		0.0106953	0.00537577	4.68511e-05
93.3333	0.0162469	0.015495	0.00467192	0.00478538	0.00892836	0.00711049	0.0107214	0.0109927	0.00807056	0.007326	0.00278256	0.00254768	0.00421269	0.003972	0.00509256	0.00455169	3.83253e-10	1.66296e-09	4.70993e-14	3.08542e-14	8.74306e-09	0.000299346	1.10626e-07	1.86698e-07		0.00973449	0.00489285	4.26418e-05
93.7255	0.0150262	0.014237	0.00403329	0.00413267	0.00826471	0.0064591	0.00979481	0.0100714	0.00746414	0.00673122	0.0024022	0.00220019	0.00389956	0.00360812	0.00465241	0.00417022	2.39142e-10	1.07641e-09	2.22359e-14	1.43385e-14	5.83426e-09	0.000271922	8.00763e-08	1.36678e-07		0.00883849	0.00444249	3.87165e-05
94.1176	0.0138677	0.0130503	0.00346917	0.00355584	0.00763795	0.00585396	0.00892697	0.00920613	0.00688866	0.00617016	0.00206621	0.00189309	0.00360383	0.00327008	0.00424019	0.00381192	1.48393e-10	6.93182e-10	1.03977e-14	6.59817e-15	3.87428e-09	0.000246446	5.77484e-08	9.97002e-08		0.00800547	0.00402379	3.50672e-05
94.5098	0.0127713	0.0119343	0.002973	0.00304825	0.00704725	0.00529339	0.00811664	0.00839577	0.00634408	0.00564253	0.00177069	0.00162286	0.00332512	0.00295694	0.00385529	0.00347637	9.15704e-11	4.44116e-10	4.81572e-15	3.00659e-15	2.56023e-09	0.000222846	4.1492e-08	7.24656e-08		0.00723335	0.0036357	3.16849e-05
94.902	0.0117368	0.0108881	0.00253843	0.00260349	0.00649167	0.00477556	0.00736229	0.00763909	0.00583016	0.00514787	0.00151187	0.00138607	0.00306298	0.00266768	0.00349698	0.00316304	5.61933e-11	2.83088e-10	2.20917e-15	1.35661e-15	1.68365e-09	0.000201046	2.97014e-08	5.24815e-08		0.00651983	0.00327706	2.85593e-05
95.2941	0.0107631	0.00991016	0.00215943	0.00221543	0.00597016	0.00429854	0.00666214	0.00693458	0.00534651	0.0046855	0.00128614	0.00117947	0.00281691	0.00240121	0.00316442	0.00287133	3.42925e-11	1.79525e-10	1.00379e-15	6.06133e-16	1.10181e-09	0.000180964	2.11825e-08	3.78721e-08		0.00586242	0.00294663	2.56795e-05
95.6863	0.00984935	0.0089988	0.00183028	0.00187827	0.00548162	0.00386033	0.00601422	0.00628052	0.00489259	0.00425462	0.0010901	0.000999969	0.00258641	0.00215642	0.00285666	0.00260051	2.08114e-11	1.13268e-10	4.51748e-16	2.6817e-16	7.17537e-10	0.000162515	1.5051e-08	2.72314e-08		0.0052585	0.00264308	2.30341e-05
96.0784	0.00899403	0.008152	0.0015456	0.00158655	0.00502488	0.00345886	0.00541638	0.00567504	0.00446772	0.00385425	0.000920545	0.000844661	0.0023709	0.00193216	0.00257269	0.0023498	1.256e-11	7.10991e-11	2.01369e-16	1.17486e-16	4.65013e-10	0.000145614	1.06547e-08	1.95101e-08		0.00470533	0.00236504	2.0611e-05
96.4706	0.00819558	0.00736748	0.0013004	0.0013352	0.0045987	0.00309207	0.00486635	0.00511611	0.0040711	0.00348333	0.00077451	0.000710846	0.00216982	0.00172726	0.00231144	0.00211837	7.53812e-12	4.44017e-11	8.89066e-17	5.09672e-17	2.99895e-10	0.000130172	7.51463e-09	1.3928e-08		0.00420013	0.00211111	1.8398e-05
96.8627	0.00745219	0.00664278	0.00109009	0.00111953	0.00420183	0.00275785	0.00436176	0.0046016	0.00370182	0.00314069	0.000649249	0.000596026	0.00198256	0.00154056	0.00207177	0.00190533	4.49908e-12	2.75875e-11	3.88792e-17	2.18941e-17	1.92467e-10	0.000116102	5.28033e-09	9.90731e-09		0.00374006	0.00187987	1.63828e-05
97.2549	0.00676186	0.00597524	0.000910436	0.000935241	0.00383297	0.00245413	0.00390018	0.00412928	0.00335891	0.00282508	0.000542249	0.000497911	0.00180852	0.0013709	0.00185252	0.00170976	2.67036e-12	1.70531e-11	1.68401e-17	9.31308e-18	1.22921e-10	0.000103316	3.6966e-09	7.02201e-09		0.0033223	0.00166989	1.45528e-05
97.6471	0.00612247	0.00536212	0.000757598	0.000778407	0.00349081	0.00217887	0.00347914	0.0036969	0.00304129	0.0025352	0.00045122	0.000414415	0.00164707	0.00121714	0.00165253	0.00153073	1.57617e-12	1.04875e-11	7.2246e-18	3.92276e-18	7.81235e-11	9.17278e-05	2.57829e-09	4.95913e-09		0.00294404	0.00147976	1.28959e-05
98.0392	0.00553179	0.00480058	0.000628104	0.000645487	0.00317402	0.00193007	0.00309616	0.00330216	0.00274788	0.0022697	0.000374094	0.00034365	0.0014976	0.00107815	0.00147063	0.00136728	9.25172e-13	6.41675e-12	3.06992e-18	1.63614e-18	4.94104e-11	8.12533e-05	1.79164e-09	3.4897e-09		0.0026025	0.0013081	1.13999e-05
98.4314	0.00498751	0.00428771	0.000518831	0.000533292	0.00288129	0.00170576	0.00274878	0.00294277	0.00247751	0.00202722	0.000309012	0.000283918	0.00135948	0.000952856	0.00130562	0.00121847	5.40043e-13	3.90604e-12	1.29206e-18	6.7574e-19	3.10984e-11	7.18104e-05	1.24038e-09	2.44686e-09		0.002295	0.00115354	1.00529e-05
98.8235	0.00448724	0.00382061	0.000426996	0.000438975	0.0026113	0.00150408	0.00243456	0.00261644	0.00222901	0.00180638	0.000254315	0.000233705	0.00123209	0.000840194	0.00115637	0.00108336	3.13487e-13	2.36557e-12	5.38618e-19	2.76357e-19	1.94779e-11	6.33199e-05	8.55559e-10	1.7095e-09		0.00201892	0.00101477	8.84356e-06
99.2157	0.0040286	0.00339638	0.000350125	0.000360007	0.00236276	0.00132321	0.00215112	0.00232094	0.00200118	0.0016058	0.000208532	0.000191663	0.00111483	0.00073916	0.00102175	0.000961002	1.80966e-13	1.42532e-12	2.22394e-19	1.11916e-19	1.21403e-11	5.57056e-05	5.87939e-10	1.19006e-09		0.00177174	0.000890528	7.76081e-06
99.6078	0.00360917	0.00301213	0.000286039	0.000294157	0.00213441	0.00116143	0.00189616	0.00205407	0.00179283	0.00142413	0.000170363	0.000156606	0.00100708	0.000648789	0.000900643	0.000850501	1.03887e-13	8.54413e-13	9.09511e-20	4.48791e-20	7.53004e-12	4.88949e-05	4.02534e-10	8.25476e-10		0.00155104	0.0007796	6.79408e-06
100	0.00322655	0.00266506	0.000232826	0.000239466	0.00192499	0.0010171	0.00166743	0.00181369	0.00160276	0.00126004	0.000138669	0.000127489	0.000908272	0.000568165	0.000792001	0.00075097	5.9308e-14	5.09565e-13	3.68414e-20	1.78208e-20	4.64783e-12	4.28188e-05	2.74575e-10	5.70532e-10		0.00135454	0.000680831	5.93333e-06
	0.00287838	0.00235243	0.000188816	0.000194225	0.00173329	0.000888674	0.0014628	0.00159775	0.00142981	0.00111222	0.000112457	0.000103403	0.000817824	0.000496423	0.000694806	0.000661558	3.36705e-14	3.02349e-13	1.47811e-20	7.00716e-21	2.85487e-12	3.74121e-05	1.86599e-10	3.92911e-10		0.00118006	0.000593132	5.16905e-06
	0.00256234	0.00207158	0.000152563	0.000156951	0.00155815	0.000774687	0.00128023	0.00140427	0.00127282	0.000979438	9.08653e-05	8.35591e-05	0.000735186	0.000432748	0.000608087	0.000581447	1.90096e-14	1.78482e-13	5.87382e-21	2.72827e-21	1.74504e-12	3.26133e-05	1.26341e-10	2.69617e-10		0.00102555	0.000515474	4.49227e-06
	0.00227616	0.00181996	0.000122818	0.000126363	0.00139843	0.000673776	0.00111778	0.00123138	0.00113067	0.000860473	7.31495e-05	6.72743e-05	0.000659824	0.000376378	0.000530924	0.000509859	1.06729e-14	1.04823e-13	2.31195e-21	1.05187e-21	1.06147e-12	2.83651e-05	8.5225e-11	1.84348e-10		0.000889116	0.000446896	3.89463e-06
	0.00201766	0.00159513	9.85093e-05	0.000101362	0.00125304	0.000584671	0.000973611	0.00107728	0.00100226	0.000754175	5.86714e-05	5.39637e-05	0.000591224	0.000326603	0.000462449	0.000446054	5.95907e-15	6.12491e-14	9.01318e-22	4.01578e-22	6.42528e-13	2.46139e-05	5.72768e-11	1.25594e-10		0.000768956	0.0003865	3.36829e-06
	0.00178472	0.00139479	7.87219e-05	8.10071e-05	0.00112094	0.00050619	0.00084602	0.000940293	0.000886548	0.000659452	4.68862e-05	4.31272e-05	0.000528896	0.000282763	0.000401845	0.000389334	3.30872e-15	3.56056e-14	3.48034e-22	1.51813e-22	3.87044e-13	2.131e-05	3.83511e-11	8.5258e-11		0.000663421	0.000333455	2.90601e-06
	0.00157533	0.00121673	6.26781e-05	6.45015e-05	0.00100114	0.000437242	0.000733399	0.000818834	0.000782536	0.000575267	3.73306e-05	3.43398e-05	0.000472369	0.000244248	0.000348352	0.000339043	1.82696e-15	2.05927e-14	1.33109e-22	5.68299e-23	2.32013e-13	1.84073e-05	2.55839e-11	5.7669e-11		0.00057098	0.000286991	2.50108e-06
	0.00138756	0.0010589	4.97209e-05	5.11697e-05	0.000892684	0.000376822	0.000634256	0.000711419	0.000689262	0.000500646	2.96134e-05	2.72422e-05	0.000421197	0.000210497	0.000301261	0.000294568	1.00319e-15	1.18491e-14	5.04239e-23	2.10657e-23	1.38403e-13	1.58637e-05	1.70037e-11	3.88676e-11		0.000490226	0.000246402	2.14735e-06
	0.00121958	0.000919375	3.92975e-05	4.04439e-05	0.000794686	0.000324009	0.000547208	0.00061667	0.000605819	0.000434678	2.34053e-05	2.15319e-05	0.000374959	0.000180995	0.000259915	0.000255336	5.47802e-16	6.78324e-15	1.89195e-23	7.73227e-24	8.21607e-14	1.36404e-05	1.12592e-11	2.61018e-11		0.00041987	0.000211039	1.83917e-06
	0.00106967	0.000796352	3.09452e-05	3.18486e-05	0.000706297	0.000277961	0.000470983	0.000533307	0.000531349	0.000376514	1.84307e-05	1.69558e-05	0.000333253	0.000155272	0.000223709	0.000220819	2.97475e-16	3.86336e-15	7.03112e-24	2.8104e-24	4.85361e-14	1.17018e-05	7.42778e-12	1.7466e-11		0.000358739	0.000180313	1.5714e-06
	0.00093619	0.000688165	2.42787e-05	2.49876e-05	0.000626717	0.000237912	0.000404411	0.00046015	0.000465046	0.000325363	1.44602e-05	1.33031e-05	0.000295705	0.0001329	0.000192088	0.000190528	1.60644e-16	2.18912e-15	2.58811e-24	1.01149e-24	2.85331e-14	1.00158e-05	4.88202e-12	1.16454e-11		0.000305763	0.000153686	1.33935e-06
	0.000817632	0.000593275	1.89783e-05	1.95324e-05	0.000555201	0.000203168	0.000346421	0.000396113	0.000406153	0.000280499	1.13034e-05	1.03988e-05	0.000261961	0.000113492	0.000164544	0.000164013	8.62708e-17	1.23411e-15	9.43592e-25	3.60483e-25	1.66923e-14	8.55314e-06	3.1969e-12	7.73667e-12		0.000259978	0.000130673	1.13879e-06
	0.000712574	0.000510264	1.47807e-05	1.52119e-05	0.000491045	0.000173102	0.00029604	0.000340201	0.000353966	0.000241252	8.80326e-06	8.09865e-06	0.000231691	9.66965e-05	0.000140614	0.000140863	4.60733e-17	6.9217e-16	3.40744e-25	1.27215e-25	9.71778e-15	7.28737e-06	2.08567e-12	5.12144e-12		0.000220512	0.000110836	9.65915e-07
	0.000619699	0.000437834	1.14692e-05	1.18034e-05	0.000433597	0.000147148	0.000252383	0.000291508	0.000307831	0.000207007	6.83097e-06	6.28402e-06	0.000204585	8.21982e-05	0.000119878	0.000120701	2.44693e-17	3.86233e-16	1.21875e-25	4.44554e-26	5.6299e-15	6.19473e-06	1.35566e-12	3.37807e-12		0.000186582	9.37818e-05	8.17293e-07
	0.000537787	0.000374799	8.86695e-06	9.12495e-06	0.000382247	0.000124799	0.000214652	0.000249208	0.000267142	0.000177204	5.28109e-06	4.85802e-06	0.000180357	6.9714e-05	0.000101956	0.000103186	1.29235e-17	2.1442e-16	4.31764e-26	1.5383e-26	3.24576e-15	5.25388e-06	8.77899e-13	2.22016e-12		0.00015749	7.91592e-05	6.8986e-07
	0.000465712	0.000320084	6.82996e-06	7.02828e-06	0.000336431	0.000105603	0.000182127	0.000212555	0.000231339	0.000151335	4.06787e-06	3.74178e-06	0.000158739	5.89908e-05	8.65071e-05	8.80098e-05	6.78774e-18	1.18429e-16	1.51503e-26	5.27093e-27	1.86216e-15	4.44574e-06	5.66404e-13	1.45391e-12		0.000132611	6.66543e-05	5.80882e-07
	0.000402442	0.000272712	5.24161e-06	5.39343e-06	0.000295625	8.91549e-05	0.000154162	0.000180875	0.00019991	0.000128938	3.12186e-06	2.8714e-06	0.000139485	4.98029e-05	7.32243e-05	7.48924e-05	3.54532e-18	6.50767e-17	5.26546e-27	1.7884e-27	1.06316e-15	3.75331e-06	3.64079e-13	9.48701e-13		0.000111391	5.59885e-05	4.87931e-07
	0.000347031	0.000231803	4.00787e-06	4.12361e-06	0.000259346	7.50969e-05	0.00013018	0.000153562	0.000172385	0.000109596	2.38706e-06	2.19536e-06	0.000122368	4.19499e-05	6.18334e-05	6.35831e-05	1.84151e-18	3.55772e-17	1.81258e-27	6.00861e-28	6.0404e-16	3.16148e-06	2.3316e-13	6.16823e-13		9.33395e-05	4.69152e-05	4.08858e-07
	0.000298615	0.000196567	3.05327e-06	3.14114e-06	0.00022715	6.31109e-05	0.000109667	0.000130072	0.000148335	9.29365e-05	1.81851e-06	1.6723e-06	0.000107176	3.52544e-05	5.20901e-05	5.38572e-05	9.51211e-19	1.93507e-17	6.18015e-28	1.999e-28	3.41519e-16	2.65689e-06	1.48765e-13	3.99604e-13		7.80232e-05	3.92168e-05	3.41768e-07
	0.000256408	0.000166294	2.3175e-06	2.38393e-06	0.000198627	5.29168e-05	9.21665e-05	0.000109922	0.000127369	7.86236e-05	1.38029e-06	1.26918e-06	9.37184e-05	2.95599e-05	4.37775e-05	4.55137e-05	4.88615e-19	1.04712e-17	2.08711e-28	6.58543e-29	1.92153e-16	2.22773e-06	9.45659e-14	2.57951e-13		6.50619e-05	3.2702e-05	2.84993e-07
	0.000219701	0.000140352	1.75258e-06	1.80259e-06	0.000173403	4.42678e-05	7.72741e-05	9.26786e-05	0.000109135	6.63583e-05	1.04382e-06	9.59677e-07	8.1817e-05	2.47285e-05	3.67039e-05	3.83742e-05	2.49599e-19	5.63737e-18	6.98126e-29	2.14826e-29	1.07588e-16	1.86362e-06	5.98904e-14	1.65914e-13		5.41219e-05	2.72033e-05	2.37072e-07
	0.000187849	0.000118178	1.32049e-06	1.35799e-06	0.000151136	3.69479e-05	6.46337e-05	7.79603e-05	9.33129e-05	5.58744e-05	7.86476e-07	7.22978e-07	7.13109e-05	2.06395e-05	3.06999e-05	3.22799e-05	1.26796e-19	3.01948e-18	2.31295e-29	6.93934e-30	5.99462e-17	1.55546e-06	3.77892e-14	1.06333e-13		4.49121e-05	2.25742e-05	1.9673e-07
	0.000160275	9.92727e-05	9.91284e-07	1.01928e-06	0.000131515	3.07678e-05	5.39322e-05	6.54281e-05	7.96156e-05	4.69359e-05	5.90401e-07	5.42653e-07	6.20528e-05	1.71872e-05	2.56169e-05	2.70909e-05	6.40551e-20	1.60904e-18	7.58997e-30	2.21964e-30	3.32387e-17	1.29529e-06	2.37556e-14	6.79035e-14		3.7179e-05	1.86873e-05	1.62856e-07
	0.000136459	8.31952e-05	7.41417e-07	7.62232e-07	0.000114254	2.55629e-05	4.48954e-05	5.47839e-05	6.77849e-05	3.93345e-05	4.41583e-07	4.05804e-07	5.39089e-05	1.42797e-05	2.13246e-05	2.26836e-05	3.21802e-20	8.53055e-19	2.46694e-30	7.03034e-31	1.83404e-17	1.07617e-06	1.48783e-14	4.3207e-14		3.07026e-05	1.54321e-05	1.34488e-07
	0.000115935	6.95572e-05	5.52497e-07	5.67908e-07	9.9098e-05	2.119e-05	3.72838e-05	4.57656e-05	5.75899e-05	3.28865e-05	3.29063e-07	3.02348e-07	4.67576e-05	1.18369e-05	1.77092e-05	1.89495e-05	1.60772e-20	4.49951e-19	7.9418e-31	2.20496e-31	1.00706e-17	8.92071e-07	9.28388e-15	2.7394e-14		2.52929e-05	1.27129e-05	1.10791e-07
	9.82894e-05	5.80178e-05	4.10204e-07	4.21566e-07	8.58126e-05	1.75249e-05	3.08889e-05	3.81437e-05	4.88246e-05	2.74307e-05	2.44314e-07	2.24437e-07	4.04891e-05	9.78961e-06	1.46717e-05	1.57936e-05	7.98761e-21	2.36119e-19	2.53235e-31	6.8479e-32	5.50285e-18	7.37778e-07	5.77156e-15	1.73059e-14		2.07857e-05	1.04475e-05	9.10482e-08
	8.31528e-05	4.82787e-05	3.03439e-07	3.11782e-07	7.41874e-05	1.44607e-05	2.55299e-05	3.17179e-05	4.13056e-05	2.28261e-05	1.80726e-07	1.65989e-07	3.5004e-05	8.07788e-06	1.21263e-05	1.3133e-05	3.94649e-21	1.23275e-19	7.99779e-32	2.10593e-32	2.99228e-18	6.08776e-07	3.57474e-15	1.08936e-14		1.70402e-05	8.5649e-06	7.46417e-08
	7.01981e-05	4.00798e-05	2.23639e-07	2.29738e-07	6.40328e-05	1.19049e-05	2.10504e-05	2.63137e-05	3.48704e-05	1.89497e-05	1.33198e-07	1.2231e-07	3.02127e-05	6.65022e-06	9.9986e-06	1.08954e-05	1.93906e-21	6.40315e-20	2.50184e-32	6.41302e-33	1.6192e-18	5.01183e-07	2.20589e-15	6.83263e-15		1.39357e-05	7.00449e-06	6.1043e-08
	5.91361e-05	3.31949e-05	1.64219e-07	1.68659e-07	5.51784e-05	9.77848e-06	1.73156e-05	2.178e-05	2.93754e-05	1.56945e-05	9.78078e-08	8.97923e-08	2.60349e-05	5.46236e-06	8.2246e-06	9.01815e-06	9.47451e-22	3.30896e-20	7.75163e-33	1.9338e-33	8.71928e-19	4.11662e-07	1.35617e-15	4.27015e-15		1.13691e-05	5.71445e-06	4.98005e-08
	4.97116e-05	2.74278e-05	1.20145e-07	1.23363e-07	4.7471e-05	8.0135e-06	1.42094e-05	1.79859e-05	2.46939e-05	1.29678e-05	7.15573e-08	6.56772e-08	2.23983e-05	4.47642e-06	6.74924e-06	7.44716e-06	4.60373e-22	1.70124e-20	2.37886e-33	5.77419e-34	4.67245e-19	3.37358e-07	8.30671e-16	2.65911e-15		9.25268e-06	4.65067e-06	4.05299e-08
	4.17006e-05	2.26093e-05	8.75764e-08	8.98997e-08	4.07738e-05	6.55208e-06	1.16327e-05	1.48184e-05	2.07145e-05	1.06897e-05	5.21599e-08	4.78616e-08	1.92384e-05	3.66006e-06	5.52534e-06	6.13566e-06	2.22458e-22	8.70199e-21	7.23083e-34	1.70727e-34	2.49168e-19	2.75834e-07	5.06913e-16	1.64994e-15		7.51196e-06	3.77574e-06	3.29049e-08
	3.49063e-05	1.85934e-05	6.36023e-08	6.52721e-08	3.49645e-05	5.34493e-06	9.50057e-06	1.21806e-05	1.73395e-05	8.79094e-06	3.7881e-08	3.47501e-08	1.64974e-05	2.98574e-06	4.51261e-06	5.04347e-06	1.06899e-22	4.42841e-21	2.17696e-34	4.99854e-35	1.32227e-19	2.25015e-07	3.08195e-16	1.02009e-15		6.08392e-06	3.05796e-06	2.66496e-08
	2.91571e-05	1.52548e-05	4.60215e-08	4.72165e-08	2.99341e-05	4.35023e-06	7.74075e-06	9.98932e-06	1.44836e-05	7.21244e-06	2.741e-08	2.51375e-08	1.41239e-05	2.43008e-06	3.67672e-06	4.13614e-06	5.1084e-23	2.2421e-21	6.49166e-35	1.44916e-35	6.98288e-20	1.83139e-07	1.86684e-16	6.28417e-16		4.91538e-06	2.47061e-06	2.1531e-08
	2.43032e-05	1.24862e-05	3.3178e-08	3.40296e-08	2.55859e-05	3.53254e-06	6.29188e-06	8.17333e-06	1.20725e-05	5.90343e-06	1.97606e-08	1.8117e-08	1.20722e-05	1.97331e-06	2.98854e-06	3.38422e-06	2.42763e-23	1.12938e-21	1.91736e-35	4.16025e-36	3.66971e-20	1.48716e-07	1.12662e-16	3.8574e-16		3.96163e-06	1.99124e-06	1.73533e-08
	2.02144e-05	1.01959e-05	2.38311e-08	2.44352e-08	2.18337e-05	2.862e-06	5.10202e-06	6.67205e-06	1.00414e-05	4.82062e-06	1.41936e-08	1.3009e-08	1.03018e-05	1.59874e-06	2.42337e-06	2.7626e-06	1.14727e-23	5.6598e-22	5.60913e-36	1.18264e-36	1.91916e-20	1.20486e-07	6.77382e-17	2.35929e-16		3.18519e-06	1.60097e-06	1.39522e-08
	1.67779e-05	8.30616e-06	1.70545e-08	1.74813e-08	1.86014e-05	2.31343e-06	4.12732e-06	5.43397e-06	8.33431e-06	3.92714e-06	1.01575e-08	9.30683e-09	8.77675e-06	1.29231e-06	1.96041e-06	2.24997e-06	5.39183e-24	2.82189e-22	1.62529e-36	3.32904e-37	9.98789e-21	9.73927e-08	4.05769e-17	1.43782e-16		2.55471e-06	1.28407e-06	1.11905e-08
	1.38961e-05	6.7507e-06	1.21601e-08	1.24603e-08	1.58219e-05	1.86574e-06	3.33088e-06	4.41542e-06	6.90278e-06	3.19172e-06	7.24247e-09	6.6337e-09	7.4653e-06	1.04222e-06	1.58211e-06	1.82823e-06	2.51995e-24	1.39977e-22	4.66452e-37	9.27929e-38	5.17273e-21	7.85453e-08	2.42166e-17	8.7311e-17		2.04405e-06	1.0274e-06	8.95361e-09
	1.14848e-05	5.4736e-06	8.6385e-09	8.84866e-09	1.34359e-05	1.50125e-06	2.68172e-06	3.57952e-06	5.70501e-06	2.58791e-06	5.14503e-09	4.71093e-09	6.33948e-06	8.38611e-07	1.27377e-06	1.48212e-06	1.17121e-24	6.90797e-23	1.32595e-37	2.56119e-38	2.66593e-21	6.32005e-08	1.43991e-17	5.28288e-17		1.63149e-06	8.20034e-07	7.14647e-09
	9.47188e-06	4.42764e-06	6.11423e-09	6.26073e-09	1.13911e-05	1.2052e-06	2.15394e-06	2.89518e-06	4.70509e-06	2.09338e-06	3.64159e-09	3.33314e-09	5.37469e-06	6.73236e-07	1.02308e-06	1.19877e-06	5.41333e-25	3.39173e-23	3.73329e-38	7.00003e-39	1.36729e-21	5.07373e-08	8.52991e-18	3.18501e-17		1.29904e-06	6.52934e-07	5.69021e-09
	7.79518e-06	3.57312e-06	4.31169e-09	4.41336e-09	9.64184e-06	9.65319e-07	1.7259e-06	2.33627e-06	3.8722e-06	1.68936e-06	2.56801e-09	2.34962e-09	4.54933e-06	5.39237e-07	8.19775e-07	9.67347e-07	2.48817e-25	1.6568e-23	1.04111e-38	1.89447e-39	6.9784e-22	4.06387e-08	5.03434e-18	1.91333e-17		1.03182e-06	5.18621e-07	4.5197e-09
	6.40168e-06	2.87672e-06	3.0294e-09	3.09964e-09	8.14792e-06	7.71418e-07	1.37964e-06	1.88091e-06	3.17999e-06	1.36011e-06	1.80429e-09	1.65021e-09	3.84445e-06	4.30922e-07	6.55304e-07	7.78802e-07	1.13732e-25	8.05186e-24	2.87573e-39	5.07702e-40	3.54433e-22	3.24757e-08	2.96025e-18	1.14527e-17		8.17574e-07	4.10937e-07	3.58125e-09
	5.24615e-06	2.31059e-06	2.12064e-09	2.16895e-09	6.87428e-06	6.15056e-07	1.10021e-06	1.51081e-06	2.60599e-06	1.09244e-06	1.26304e-09	1.15472e-09	3.2435e-06	3.43577e-07	5.22582e-07	6.25561e-07	5.16974e-26	3.89313e-24	7.86756e-40	1.34728e-40	1.79141e-22	2.58931e-08	1.73422e-18	6.83067e-18		6.46243e-07	3.24821e-07	2.83076e-09
	4.29008e-06	1.85151e-06	1.47904e-09	1.51211e-09	5.7903e-06	4.89267e-07	8.75293e-07	1.21074e-06	2.13107e-06	8.75388e-07	8.80908e-10	8.05032e-10	2.73205e-06	2.7331e-07	4.15749e-07	5.01313e-07	2.33691e-26	1.87275e-24	2.13195e-40	3.54024e-41	9.01033e-23	2.05975e-08	1.0122e-18	4.05936e-18		5.09576e-07	2.56128e-07	2.23212e-09
	3.50081e-06	1.48014e-06	1.02777e-09	1.05031e-09	4.86932e-06	3.88315e-07	6.94695e-07	9.68026e-07	1.739e-06	6.99805e-07	6.12134e-10	5.59172e-10	2.2975e-06	2.16917e-07	3.29969e-07	4.00817e-07	1.05052e-26	8.96268e-25	5.72206e-41	9.21214e-42	4.50992e-23	1.63476e-08	5.88596e-19	2.40376e-18		4.00835e-07	2.01472e-07	1.75579e-09
	2.8507e-06	1.18047e-06	7.11568e-10	7.26851e-10	4.08817e-06	3.07488e-07	5.50047e-07	7.72186e-07	1.41606e-06	5.58122e-07	4.23804e-10	3.86967e-10	1.92893e-06	1.71766e-07	2.61263e-07	3.19729e-07	4.69623e-27	4.2675e-25	1.52111e-41	2.3738e-42	2.24636e-23	1.29448e-08	3.41002e-19	1.41828e-18		3.14533e-07	1.58094e-07	1.37776e-09
	2.31639e-06	9.3925e-07	4.90838e-10	5.01154e-10	3.42675e-06	2.42928e-07	4.3448e-07	6.14545e-07	1.15065e-06	4.44075e-07	2.92339e-10	2.66809e-10	1.61685e-06	1.35702e-07	2.06371e-07	2.54456e-07	2.08777e-27	2.02156e-25	4.00491e-42	6.05361e-43	1.11346e-23	1.0227e-08	1.96827e-19	8.3382e-19		2.46213e-07	1.23754e-07	1.0785e-09
	1.87823e-06	7.45562e-07	3.37335e-10	3.44266e-10	2.86767e-06	1.91485e-07	3.42376e-07	4.87959e-07	9.32999e-07	3.525e-07	2.00914e-10	1.83283e-10	1.35306e-06	1.06965e-07	1.62623e-07	2.02043e-07	9.23e-28	9.52743e-26	1.04397e-42	1.52742e-43	5.49226e-24	8.06126e-09	1.13188e-19	4.88451e-19		1.92265e-07	9.66381e-08	8.42185e-10
	1.51973e-06	5.90422e-07	2.30988e-10	2.35621e-10	2.39591e-06	1.5059e-07	2.69155e-07	3.86554e-07	7.54915e-07	2.7915e-07	1.37574e-10	1.25442e-10	1.13047e-06	8.41211e-08	1.27844e-07	1.60055e-07	4.05795e-28	4.46728e-26	2.70451e-43	3.78351e-44	2.69595e-24	6.33965e-09	6.4849e-20	2.85107e-19		1.49773e-07	7.52802e-08	6.56055e-10
	1.22705e-06	4.66462e-07	1.57586e-10	1.60668e-10	1.9985e-06	1.18158e-07	2.11089e-07	3.05517e-07	6.09528e-07	2.20542e-07	9.3857e-11	8.5538e-11	9.42958e-07	6.60045e-08	1.00264e-07	1.26501e-07	1.77419e-28	2.08395e-26	6.86636e-44	9.80909e-45	1.31691e-24	4.97432e-09	3.70165e-20	1.65819e-19		1.16388e-07	5.85002e-08	5.0982e-10
	9.88635e-07	3.67659e-07	1.07115e-10	1.09155e-10	1.6643e-06	9.24995e-08	1.65155e-07	2.40911e-07	4.91098e-07	1.73828e-07	6.37968e-11	5.81129e-11	7.85271e-07	5.16711e-08	7.84459e-08	9.97508e-08	7.71395e-29	9.67186e-27	1.68156e-44	2.8026e-45	6.4015e-25	3.89411e-09	2.10511e-20	9.60945e-20		9.02256e-08	4.53501e-08	3.95218e-10
	7.94856e-07	2.89101e-07	7.25411e-11	7.38847e-11	1.38374e-06	7.2247e-08	1.28909e-07	1.89529e-07	3.94839e-07	1.36686e-07	4.32049e-11	3.93354e-11	6.52891e-07	4.03579e-08	6.12297e-08	7.84758e-08	3.33535e-29	4.4659e-27	4.2039e-45	0	3.09665e-25	3.04151e-09	1.19273e-20	5.54883e-20		6.97741e-08	3.50705e-08	3.05634e-10
	6.37704e-07	2.26793e-07	4.89464e-11	4.98267e-11	1.1486e-06	5.62998e-08	1.00378e-07	1.48762e-07	3.16775e-07	1.07227e-07	2.91521e-11	2.65271e-11	5.41945e-07	3.14497e-08	4.7678e-08	6.1596e-08	1.43414e-29	2.05157e-27	1.4013e-45	0	1.49068e-25	2.37015e-09	6.73287e-21	3.19259e-20		5.38273e-08	2.70552e-08	2.35782e-10
	5.10538e-07	1.77495e-07	3.29049e-11	3.34785e-11	9.51865e-07	4.37724e-08	7.79758e-08	1.16495e-07	2.53606e-07	8.3919e-08	1.95979e-11	1.78236e-11	4.49121e-07	2.44517e-08	3.70372e-08	4.82355e-08	6.13237e-30	9.37649e-28	0	0	7.14103e-26	1.84276e-09	3.78656e-21	1.8303e-20		4.14242e-08	2.08211e-08	1.81452e-10
	4.07864e-07	1.38585e-07	2.20395e-11	2.24113e-11	7.87547e-07	3.39547e-08	6.04289e-08	9.10162e-08	2.02604e-07	6.55226e-08	1.31266e-11	1.19315e-11	3.7159e-07	1.89675e-08	2.87027e-08	3.76858e-08	2.60766e-30	4.26355e-28	0	0	3.40424e-26	1.42945e-09	2.12167e-21	1.04554e-20		3.18017e-08	1.59845e-08	1.39302e-10
	3.25149e-07	1.0795e-07	1.47078e-11	1.49474e-11	6.50536e-07	2.62788e-08	4.6719e-08	7.09459e-08	1.61515e-07	5.10385e-08	8.75985e-12	7.95781e-12	3.06944e-07	1.46796e-08	2.21907e-08	2.93756e-08	1.10271e-30	1.92877e-28	0	0	1.61496e-26	1.1063e-09	1.1844e-21	5.95112e-21		2.43551e-08	1.22416e-08	1.06684e-10
	2.58658e-07	8.38887e-08	9.779e-12	9.93253e-12	5.36487e-07	2.02917e-08	3.60335e-08	5.51739e-08	1.28487e-07	3.96624e-08	5.8243e-12	5.28797e-12	2.53132e-07	1.13351e-08	1.71153e-08	2.28451e-08	4.63721e-31	8.68094e-29	0	0	7.6241e-27	8.54253e-10	6.58731e-22	3.37516e-21		1.86069e-08	9.3524e-09	8.15046e-11
	2.05328e-07	6.5037e-08	6.47805e-12	6.57585e-12	4.41714e-07	1.56328e-08	2.77258e-08	4.28093e-08	1.01995e-07	3.07494e-08	3.85828e-12	3.50091e-12	2.08415e-07	8.73262e-09	1.31693e-08	1.77254e-08	1.93927e-31	3.88714e-29	0	0	3.58177e-27	6.5812e-10	3.65011e-22	1.90734e-21		1.41809e-08	7.12773e-09	6.2117e-11
	1.62649e-07	5.03029e-08	4.2756e-12	4.33751e-12	3.63091e-07	1.2016e-08	2.12827e-08	3.3139e-08	8.07946e-08	2.37831e-08	2.54651e-12	2.30924e-12	1.71318e-07	6.71226e-09	1.01089e-08	1.37214e-08	8.06504e-32	1.73169e-29	0	0	1.67452e-27	5.05859e-10	2.01508e-22	1.07399e-21		1.07814e-08	5.41905e-09	4.72261e-11
	1.28567e-07	3.88151e-08	2.81159e-12	2.85053e-12	2.97978e-07	9.2149e-09	1.6298e-08	2.5594e-08	6.38648e-08	1.83517e-08	1.67456e-12	1.51759e-12	1.40595e-07	5.14754e-09	7.74125e-09	1.05973e-08	3.3355e-32	7.6752e-30	0	0	7.79048e-28	3.87936e-10	1.10832e-22	6.02576e-22		8.17693e-09	4.10997e-09	3.58177e-11
	1.01412e-07	2.98802e-08	1.84209e-12	1.86642e-12	2.44144e-07	7.05062e-09	1.2451e-08	1.97212e-08	5.03756e-08	1.41273e-08	1.09713e-12	9.9366e-13	1.15195e-07	3.93855e-09	5.91401e-09	8.1657e-09	1.37183e-32	3.38443e-30	0	0	3.6068e-28	2.96822e-10	6.07333e-23	3.3687e-22		6.18657e-09	3.10956e-09	2.70993e-11
	7.98224e-08	2.29479e-08	1.20246e-12	1.21755e-12	1.9971e-07	5.38233e-09	9.48941e-09	1.5161e-08	3.96512e-08	1.08497e-08	7.16175e-13	6.48212e-13	9.42297e-08	3.00662e-09	4.50731e-09	6.2775e-09	5.61085e-33	1.48477e-30	0	0	1.66174e-28	2.26589e-10	3.31572e-23	1.87651e-22		4.66932e-09	2.34694e-09	2.04532e-11
	6.2696e-08	1.75824e-08	7.82047e-13	7.91343e-13	1.63098e-07	4.09939e-09	7.21504e-09	1.16284e-08	3.11438e-08	8.3129e-09	4.65781e-13	4.21302e-13	7.69549e-08	2.28996e-09	3.42702e-09	4.8148e-09	2.28214e-33	6.4805e-31	0	0	7.61883e-29	1.72579e-10	1.8035e-23	1.04154e-22		3.51562e-09	1.76705e-09	1.53996e-11
	4.91398e-08	1.34396e-08	5.06755e-13	5.12434e-13	1.32981e-07	3.11512e-09	5.47271e-09	8.8983e-09	2.44098e-08	6.35422e-09	3.0182e-13	2.72814e-13	6.27449e-08	1.74014e-09	2.59945e-09	3.6844e-09	9.23084e-34	2.81408e-31	0	0	3.47613e-29	1.31142e-10	9.77333e-24	5.76027e-23		2.64054e-09	1.32721e-09	1.15665e-11
	3.84331e-08	1.02488e-08	3.27165e-13	3.30604e-13	1.0825e-07	2.36176e-09	4.14124e-09	6.79349e-09	1.90913e-08	4.84559e-09	1.94857e-13	1.7601e-13	5.10756e-08	1.3193e-09	1.96702e-09	2.81289e-09	3.71302e-34	1.21574e-31	0	0	1.57829e-29	9.94271e-11	5.27664e-24	3.17429e-23		1.97847e-09	9.94436e-10	8.66635e-12
	2.99954e-08	7.79708e-09	2.10444e-13	2.12508e-13	8.79741e-08	1.7865e-09	3.12625e-09	5.17459e-09	1.49e-08	3.68644e-09	1.25339e-13	1.13137e-13	4.1509e-08	9.97958e-10	1.48491e-09	2.14257e-09	1.48525e-34	5.22545e-32	0	0	7.13117e-30	7.52095e-11	2.83831e-24	1.74297e-23		1.47879e-09	7.43286e-10	6.47762e-12
	2.33606e-08	5.9179e-09	1.34868e-13	1.36094e-13	7.13801e-08	1.34827e-09	2.3544e-09	3.93239e-09	1.16042e-08	2.79797e-09	8.03266e-14	7.2455e-14	3.36794e-08	7.53158e-10	1.1183e-09	1.62823e-09	5.90823e-35	2.23452e-32	0	0	3.2064e-30	5.67605e-11	1.52108e-24	9.53609e-24		1.10263e-09	5.54217e-10	4.82991e-12
	1.81548e-08	4.48104e-09	8.61164e-14	8.68361e-14	5.78219e-08	1.01521e-09	1.76889e-09	2.9815e-09	9.01825e-09	2.11863e-09	5.12903e-14	4.62305e-14	2.72822e-08	5.67109e-10	8.40195e-10	1.23451e-09	2.33723e-35	9.5065e-33	0	0	1.43469e-30	4.27392e-11	8.1214e-25	5.19864e-24		8.2016e-10	4.12237e-10	3.59258e-12
	1.40791e-08	3.38505e-09	5.47853e-14	5.52024e-14	4.67629e-08	7.62682e-10	1.32583e-09	2.25533e-09	6.99372e-09	1.60045e-09	3.26297e-14	2.93891e-14	2.20642e-08	4.26042e-10	6.29746e-10	9.33834e-10	9.1946e-36	4.02379e-33	0	0	6.38824e-31	3.2108e-11	4.32015e-25	2.82389e-24		6.08569e-10	3.05885e-10	2.66574e-12
	1.08953e-08	2.5511e-09	3.47252e-14	3.49633e-14	3.77575e-08	5.71658e-10	9.91374e-10	1.70209e-09	5.41218e-09	1.20615e-09	2.06821e-14	1.86141e-14	1.78152e-08	3.19334e-10	4.70886e-10	7.04763e-10	3.59708e-36	1.69444e-33	0	0	2.83066e-31	2.40661e-11	2.28957e-25	1.52843e-24		4.50469e-10	2.26419e-10	1.97321e-12
	8.41361e-09	1.91807e-09	2.19295e-14	2.2063e-14	3.04368e-08	4.27499e-10	7.39523e-10	1.2816e-09	4.1794e-09	9.06861e-10	1.3061e-14	1.17461e-14	1.43611e-08	2.38805e-10	3.51261e-10	5.30656e-10	1.39944e-36	7.09898e-34	0	0	1.24818e-31	1.79972e-11	1.20892e-25	8.2429e-25		3.32632e-10	1.67191e-10	1.45704e-12
	6.48341e-09	1.43872e-09	1.3798e-14	1.38712e-14	2.44956e-08	3.18962e-10	5.50339e-10	9.62768e-10	3.22059e-09	6.80226e-10	8.21796e-15	7.38485e-15	1.15578e-08	1.78176e-10	2.61402e-10	3.9864e-10	5.41431e-37	2.95898e-34	0	0	5.47709e-32	1.34279e-11	6.35961e-26	4.42949e-25		2.45023e-10	1.23156e-10	1.07328e-12
	4.98543e-09	1.07663e-09	8.64974e-15	8.68877e-15	1.96821e-08	2.37438e-10	4.08577e-10	7.21584e-10	2.47648e-09	5.09028e-10	5.15172e-15	4.6258e-15	9.28664e-09	1.32635e-10	1.94067e-10	2.98776e-10	2.08314e-37	1.22706e-34	0	0	2.3917e-32	9.99585e-12	3.33312e-26	2.37174e-25		1.8005e-10	9.04987e-11	7.88681e-13
	3.82543e-09	8.03766e-10	5.4025e-15	5.42252e-15	1.57887e-08	1.76347e-10	3.02609e-10	5.39572e-10	1.90025e-09	3.80019e-10	3.21769e-15	2.88689e-15	7.44963e-09	9.85092e-11	1.43734e-10	2.23413e-10	7.97042e-38	5.06253e-35	0	0	1.03931e-32	7.42398e-12	1.74044e-26	1.26537e-25		1.31985e-10	6.63396e-11	5.78139e-13
	2.92911e-09	5.98644e-10	3.36193e-15	3.37163e-15	1.26449e-08	1.30675e-10	2.2359e-10	4.02541e-10	1.45502e-09	2.83038e-10	2.00234e-15	1.79502e-15	5.96628e-09	7.29962e-11	1.06202e-10	1.66675e-10	3.0327e-38	2.078e-35	0	0	4.49436e-33	5.50124e-12	9.05432e-27	6.72678e-26		9.65161e-11	4.85118e-11	4.22773e-13
	2.23805e-09	4.44819e-10	2.08442e-15	2.0887e-15	1.01107e-08	9.66097e-11	1.64812e-10	2.99618e-10	1.11174e-09	2.1031e-10	1.24146e-15	1.112e-15	4.77053e-09	5.39672e-11	7.8283e-11	1.24059e-10	1.14753e-38	8.48598e-36	0	0	1.93407e-33	4.06715e-12	4.69289e-27	3.56316e-26		7.04074e-11	3.53889e-11	3.08408e-13
	1.70641e-09	3.29741e-10	1.28761e-15	1.28917e-15	8.07115e-09	7.12618e-11	1.21196e-10	2.22496e-10	8.47647e-10	1.55901e-10	7.6689e-16	6.86338e-16	3.80823e-09	3.98076e-11	5.75663e-11	9.21259e-11	4.31803e-39	3.44775e-36	0	0	8.2825e-34	3.00003e-12	2.42334e-27	1.88062e-26		5.12367e-11	2.57531e-11	2.24434e-13
	1.2983e-09	2.43859e-10	7.92475e-16	7.92756e-16	6.43258e-09	5.24443e-11	8.89109e-11	1.64845e-10	6.44921e-10	1.15296e-10	4.71992e-16	4.22054e-16	3.0351e-09	2.9296e-11	4.22312e-11	6.8255e-11	1.61582e-39	1.39363e-36	0	0	3.52966e-34	2.20784e-12	1.24674e-27	9.89024e-27		3.71953e-11	1.86954e-11	1.62928e-13
	9.85699e-10	1.7992e-10	4.85948e-16	4.85698e-16	5.11832e-09	3.85076e-11	6.50705e-11	1.2185e-10	4.89639e-10	8.50658e-11	2.89427e-16	2.5858e-16	2.41499e-09	2.15108e-11	3.09074e-11	5.04527e-11	6.01293e-40	5.60447e-37	0	0	1.49688e-34	1.62112e-12	6.39035e-28	5.18263e-27		2.69363e-11	1.3539e-11	1.1799e-13
	7.46779e-10	1.32433e-10	2.96891e-16	2.96476e-16	4.06597e-09	2.82099e-11	4.75092e-11	8.98612e-11	3.70957e-10	6.2614e-11	1.76826e-16	1.57841e-16	1.91846e-09	1.57583e-11	2.25661e-11	3.72076e-11	2.22519e-40	2.24233e-37	0	0	6.31722e-35	1.1876e-12	3.26334e-28	2.70603e-27		1.94595e-11	9.78094e-12	8.52393e-14
	5.64571e-10	9.72495e-11	1.8072e-16	1.80306e-16	3.22474e-09	2.06187e-11	3.46048e-11	6.61175e-11	2.80447e-10	4.59794e-11	1.07635e-16	9.5993e-17	1.52153e-09	1.15178e-11	1.64367e-11	2.73764e-11	8.18905e-41	8.9257e-38	0	0	2.65306e-35	8.68023e-13	1.66031e-28	1.40784e-27		1.4024e-11	7.04886e-12	6.14297e-14
	4.25916e-10	7.1245e-11	1.09602e-16	1.09252e-16	2.55339e-09	1.50359e-11	2.51454e-11	4.85354e-11	2.11571e-10	3.36845e-11	6.5278e-17	5.81644e-17	1.20477e-09	8.3992e-12	1.19436e-11	2.00964e-11	2.99696e-41	3.53478e-38	0	0	1.1088e-35	6.32992e-13	8.41593e-29	7.29815e-28		1.00822e-11	5.06759e-12	4.41632e-14
	3.20632e-10	5.20711e-11	6.62266e-17	6.59543e-17	2.01852e-09	1.09396e-11	1.82283e-11	3.55466e-11	1.59272e-10	2.46191e-11	3.9444e-17	3.51133e-17	9.52404e-10	6.11098e-12	8.65811e-12	1.47183e-11	1.09077e-41	1.39271e-38	0	0	4.61146e-36	4.60544e-13	4.25015e-29	3.76973e-28		7.23069e-12	3.63436e-12	3.16728e-14
	2.40862e-10	3.79677e-11	3.98703e-17	3.96693e-17	1.5931e-09	7.9411e-12	1.31824e-11	2.59738e-11	1.19647e-10	1.79511e-11	2.37464e-17	2.11195e-17	7.51677e-10	4.43598e-12	6.26144e-12	1.07546e-11	3.94746e-42	5.45927e-39	0	0	1.90858e-36	3.34311e-13	2.13843e-29	1.9402e-28		5.17309e-12	2.60015e-12	2.26599e-14
	1.80555e-10	2.7619e-11	2.39149e-17	2.37718e-17	1.2553e-09	5.7513e-12	9.51068e-12	1.89352e-11	8.96894e-11	1.30582e-11	1.42436e-17	1.26559e-17	5.92291e-10	3.21274e-12	4.51741e-12	7.84024e-12	1.42092e-42	2.12906e-39	0	0	7.86073e-37	2.42123e-13	1.07195e-29	9.94998e-29		3.69202e-12	1.85572e-12	1.61723e-14
	1.3506e-10	2.00436e-11	1.42919e-17	1.41928e-17	9.87516e-10	4.15583e-12	6.84528e-12	1.37721e-11	6.70903e-11	9.47659e-12	8.51217e-18	7.55608e-18	4.65942e-10	2.32149e-12	3.25139e-12	5.70245e-12	5.08671e-43	8.2607e-40	0	0	3.22181e-37	1.74955e-13	5.35353e-30	5.08435e-29		2.62858e-12	1.3212e-12	1.15141e-14
	1.00815e-10	1.45118e-11	8.50974e-18	8.44248e-18	7.75594e-10	2.9961e-12	4.91514e-12	9.99381e-12	5.00791e-11	6.86114e-12	5.06834e-18	4.49468e-18	3.6595e-10	1.67365e-12	2.33461e-12	4.138e-12	1.80767e-43	3.18877e-40	0	0	1.31407e-37	1.26132e-13	2.66376e-30	2.58874e-29		1.86691e-12	9.38365e-13	8.1777e-15
	7.50932e-11	1.04819e-11	5.04828e-18	5.00344e-18	6.0816e-10	2.15506e-12	3.52082e-12	7.23532e-12	3.7302e-11	4.95582e-12	3.00672e-18	2.66378e-18	2.8695e-10	1.20384e-12	1.67233e-12	2.99583e-12	6.44597e-44	1.22464e-40	0	0	5.33363e-38	9.07254e-14	1.3205e-30	1.31334e-29		1.32273e-12	6.64841e-13	5.79398e-15
	5.58154e-11	7.55327e-12	2.98383e-18	2.95437e-18	4.76097e-10	1.54657e-12	2.51604e-12	5.22615e-12	2.77259e-11	3.57117e-12	1.77715e-18	1.57287e-18	2.24638e-10	8.63931e-13	1.19508e-12	2.16392e-12	2.24208e-44	4.67922e-41	0	0	2.15432e-38	6.51087e-14	6.52184e-31	6.63907e-30		9.34888e-13	4.69902e-13	4.09512e-15
	4.13987e-11	5.43007e-12	1.75714e-18	1.73803e-18	3.72105e-10	1.10735e-12	1.79372e-12	3.7662e-12	2.05645e-11	2.56733e-12	1.04654e-18	9.25309e-19	1.75571e-10	6.18579e-13	8.51986e-13	1.55942e-12	8.40779e-45	1.77867e-41	0	0	8.65922e-39	4.66182e-14	3.20915e-31	3.34407e-30		6.59164e-13	3.31315e-13	2.88736e-15
	3.06406e-11	3.8945e-12	1.03096e-18	1.0187e-18	2.90355e-10	7.91059e-13	1.27572e-12	2.70784e-12	1.52205e-11	1.84131e-12	6.14032e-19	5.42346e-19	1.36999e-10	4.41894e-13	6.05946e-13	1.1212e-12	2.8026e-45	6.72763e-42	0	0	3.46363e-39	3.33026e-14	1.57325e-31	1.67835e-30		4.63629e-13	2.33034e-13	2.03085e-15
	2.26301e-11	2.78659e-12	6.0267e-19	5.94887e-19	2.26197e-10	5.63816e-13	9.05153e-13	1.9424e-12	1.12413e-11	1.31749e-12	3.58946e-19	3.16711e-19	1.06727e-10	3.14954e-13	4.29932e-13	8.04263e-13	1.4013e-45	2.53075e-42	0	0	1.37869e-39	2.3736e-14	7.6841e-32	8.39318e-31		3.25306e-13	1.63509e-13	1.42495e-15
	1.66784e-11	1.98916e-12	3.5101e-19	3.46113e-19	1.75929e-10	4.00934e-13	6.40696e-13	1.39012e-12	8.28487e-12	9.40469e-13	2.09059e-19	1.84267e-19	8.3009e-11	2.23966e-13	3.0432e-13	5.75589e-13	0	9.47278e-43	0	0	5.46117e-40	1.68788e-14	3.73919e-32	4.18225e-31		2.27697e-13	1.14448e-13	9.97391e-16
	1.22659e-11	1.41658e-12	2.03687e-19	2.00631e-19	1.3661e-10	2.84455e-13	4.52425e-13	9.92576e-13	6.09301e-12	6.69756e-13	1.21314e-19	1.06814e-19	6.44568e-11	1.589e-13	2.14894e-13	4.10983e-13	0	3.53127e-43	0	0	2.15272e-40	1.19752e-14	1.8128e-32	2.0765e-31		1.58989e-13	7.99127e-14	6.96426e-16
	9.0017e-12	1.00644e-12	1.17763e-19	1.15871e-19	1.05906e-10	2.01354e-13	3.18718e-13	7.07087e-13	4.47153e-12	4.75843e-13	7.01387e-20	6.16885e-20	4.99697e-11	1.12479e-13	1.51386e-13	2.92774e-13	0	1.30321e-43	0	0	8.4445e-41	8.47677e-15	8.75609e-33	1.02729e-31		1.10744e-13	5.56633e-14	4.85097e-16
	6.59216e-12	7.13364e-13	6.78354e-20	6.6673e-20	8.19691e-11	1.42205e-13	2.2399e-13	5.0255e-13	3.27461e-12	3.37277e-13	4.04023e-20	3.5496e-20	3.86756e-11	7.94371e-14	1.06392e-13	2.08084e-13	0	4.76441e-44	0	0	3.29641e-41	5.98665e-15	4.21366e-33	5.06397e-32		7.69517e-14	3.86782e-14	3.37075e-16
	4.81736e-12	5.0444e-13	3.8932e-20	3.82227e-20	6.33395e-11	1.00202e-13	1.57043e-13	3.56355e-13	2.39299e-12	2.38498e-13	2.31876e-20	2.03493e-20	2.98856e-11	5.59736e-14	7.45926e-14	1.47551e-13	0	1.82169e-44	0	0	1.28051e-41	4.21836e-15	2.02021e-33	2.4873e-32		5.33408e-14	2.68107e-14	2.33651e-16
	3.51292e-12	3.55863e-13	2.22618e-20	2.18318e-20	4.88643e-11	7.04434e-14	1.09842e-13	2.52106e-13	1.74502e-12	1.68251e-13	1.3259e-20	1.1623e-20	2.30558e-11	3.93504e-14	5.21732e-14	1.04386e-13	0	7.00649e-45	0	0	4.95079e-42	2.96558e-15	9.64986e-34	1.21732e-32		3.68846e-14	1.85393e-14	1.61567e-16
	2.55627e-12	2.50457e-13	1.26828e-20	1.24238e-20	3.7636e-11	4.94097e-14	7.66454e-14	1.77943e-13	1.26981e-12	1.18415e-13	7.5538e-21	6.61429e-21	1.77579e-11	2.76008e-14	3.64053e-14	7.36786e-14	0	2.8026e-45	0	0	1.90436e-42	2.08009e-15	4.59234e-34	5.93635e-33		2.54433e-14	1.27886e-14	1.1145e-16
	1.85619e-12	1.75856e-13	7.19904e-21	7.04395e-21	2.89406e-11	3.45773e-14	5.3354e-14	1.25308e-13	9.22051e-13	8.31443e-14	4.2877e-21	3.75012e-21	1.36551e-11	1.93152e-14	2.53422e-14	5.18844e-14	0	1.4013e-45	0	0	7.28675e-43	1.45566e-15	2.17739e-34	2.88451e-33		1.75084e-14	8.80026e-15	7.66928e-17
	1.34499e-12	1.23185e-13	4.07133e-21	3.97901e-21	2.2218e-11	2.41421e-14	3.7052e-14	8.80382e-14	6.68113e-13	5.82415e-14	2.42485e-21	2.11838e-21	1.04832e-11	1.3486e-14	1.75991e-14	3.64528e-14	0	0	0	0	2.77457e-43	1.01635e-15	1.02855e-34	1.39658e-33		1.20189e-14	6.04105e-15	5.26468e-17
	9.72504e-13	8.60859e-14	2.29403e-21	2.2394e-21	1.70293e-11	1.68177e-14	2.56698e-14	6.17109e-14	4.83084e-13	4.07013e-14	1.36631e-21	1.19223e-21	8.03498e-12	9.39453e-15	1.21927e-14	2.55518e-14	0	0	0	0	1.05097e-43	7.08003e-16	4.84065e-35	6.73744e-34		8.23048e-15	4.13688e-15	3.60523e-17
	7.01687e-13	6.00182e-14	1.28785e-21	1.25569e-21	1.30311e-11	1.16886e-14	1.77417e-14	4.31569e-14	3.48558e-13	2.83765e-14	7.67034e-22	6.68517e-22	6.1485e-12	6.52938e-15	8.42702e-15	1.78694e-14	0	0	0	0	3.92364e-44	4.92076e-16	2.26971e-35	3.23865e-34		5.62251e-15	2.82604e-15	2.46285e-17
	5.05212e-13	4.17454e-14	7.20335e-22	7.01509e-22	9.95543e-12	8.10525e-15	1.2233e-14	3.01117e-14	2.5096e-13	1.97372e-14	4.29026e-22	3.73475e-22	4.69729e-12	4.52767e-15	5.81048e-15	1.24679e-14	0	0	0	0	1.54143e-44	3.41221e-16	1.06029e-35	1.55121e-34		3.83159e-15	1.92587e-15	1.67836e-17
	3.62979e-13	2.89675e-14	4.01426e-22	3.90463e-22	7.59332e-12	5.60758e-15	8.41466e-15	2.09613e-14	1.80307e-13	1.36958e-14	2.39087e-22	2.07878e-22	3.58277e-12	3.13245e-15	3.99682e-15	8.67916e-15	0	0	0	0	5.60519e-45	2.36072e-16	4.93476e-36	7.40316e-35		2.60478e-15	1.30924e-15	1.14098e-17
	2.60237e-13	2.00534e-14	2.22885e-22	2.16532e-22	5.78225e-12	3.87071e-15	5.77436e-15	1.45579e-14	1.29271e-13	9.4812e-15	1.32748e-22	1.15279e-22	2.72825e-12	2.16222e-15	2.74272e-15	6.02779e-15	0	0	0	0	1.4013e-45	1.62952e-16	2.28821e-36	3.52048e-35		1.76648e-15	8.87884e-16	7.73777e-18
	1.86181e-13	1.38497e-14	1.23298e-22	1.19636e-22	4.39597e-12	2.66571e-15	3.95308e-15	1.00873e-14	9.24839e-14	6.54811e-15	7.34354e-23	6.3693e-23	2.07416e-12	1.48909e-15	1.87764e-15	4.17673e-15	0	0	0	0	1.4013e-45	1.12223e-16	1.0571e-36	1.66811e-35		1.19506e-15	6.00671e-16	5.23475e-18
	1.32916e-13	9.54263e-15	6.79572e-23	6.58568e-23	3.33662e-12	1.83164e-15	2.6998e-15	6.97352e-15	6.60253e-14	4.51174e-15	4.04748e-23	3.50614e-23	1.57432e-12	1.02317e-15	1.28236e-15	2.88743e-15	0	0	0	0	0	7.71098e-17	4.86545e-37	7.87565e-36		8.06516e-16	4.05379e-16	3.53281e-18
	9.46893e-14	6.55951e-15	3.73179e-23	3.61189e-23	2.52844e-12	1.25567e-15	1.83946e-15	4.80978e-15	4.70362e-14	3.10132e-15	2.22263e-23	1.92293e-23	1.193e-12	7.01429e-16	8.73714e-16	1.99152e-15	0	0	0	0	0	5.2862e-17	2.23109e-37	3.70498e-36		5.42977e-16	2.72917e-16	2.37842e-18
	6.73134e-14	4.49832e-15	2.04175e-23	1.97363e-23	1.91289e-12	8.58846e-16	1.2503e-15	3.30975e-15	3.34375e-14	2.12679e-15	1.21605e-23	1.05074e-23	9.02564e-13	4.7976e-16	5.93873e-16	1.37042e-15	0	0	0	0	0	3.61563e-17	1.0193e-37	1.7367e-36		3.64665e-16	1.83291e-16	1.59736e-18
	4.77508e-14	3.07754e-15	1.11298e-23	1.07447e-23	1.44485e-12	5.86086e-16	8.47821e-16	2.27228e-15	2.37199e-14	1.45506e-15	6.62884e-24	5.72034e-24	6.81726e-13	3.27394e-16	4.02701e-16	9.40853e-16	0	0	0	0	0	2.46735e-17	4.63952e-38	8.11152e-37		2.44315e-16	1.228e-16	1.07018e-18
	3.38017e-14	2.10055e-15	6.04475e-24	5.82798e-24	1.08955e-12	3.99038e-16	5.73532e-16	1.55642e-15	1.67907e-14	9.93137e-16	3.60021e-24	3.10275e-24	5.14086e-13	2.22907e-16	2.72418e-16	6.44447e-16	0	0	0	0	0	1.6799e-17	2.10394e-38	3.77501e-37		1.63287e-16	8.20727e-17	7.15251e-19
	2.38767e-14	1.43034e-15	3.27092e-24	3.14949e-24	8.20289e-13	2.71065e-16	3.87057e-16	1.06363e-15	1.18606e-14	6.76261e-16	1.94814e-24	1.67675e-24	3.87039e-13	1.5142e-16	1.83846e-16	4.40402e-16	0	0	0	0	0	1.14115e-17	9.50562e-39	1.75054e-37		1.08867e-16	5.47196e-17	4.76873e-19
	1.68302e-14	9.7167e-16	1.76346e-24	1.69574e-24	6.16565e-13	1.83712e-16	2.6059e-16	7.25187e-16	8.36027e-15	4.59404e-16	1.0503e-24	9.02791e-25	2.90915e-13	1.02624e-16	1.23776e-16	3.00268e-16	0	0	0	0	0	7.73406e-18	4.27875e-39	8.08845e-38		7.24074e-17	3.63941e-17	3.17169e-19
	1.18381e-14	6.58529e-16	9.47245e-25	9.0965e-25	4.62684e-13	1.24225e-16	1.75026e-16	4.93295e-16	5.88049e-15	3.11351e-16	5.64172e-25	4.84287e-25	2.18309e-13	6.93935e-17	8.31345e-17	2.04252e-16	0	0	0	0	0	5.22972e-18	1.91885e-39	3.72389e-38		4.80413e-17	2.4147e-17	2.10437e-19
	8.30908e-15	4.45252e-16	5.06946e-25	4.86168e-25	3.46644e-13	8.38083e-17	1.17277e-16	3.34782e-16	4.12748e-15	2.10514e-16	3.01933e-25	2.5883e-25	1.63558e-13	4.68162e-17	5.57047e-17	1.38619e-16	0	0	0	0	0	3.52822e-18	8.57341e-40	1.70831e-38		3.17974e-17	1.59823e-17	1.39283e-19
	5.81973e-15	3.00339e-16	2.70311e-25	2.58878e-25	2.59284e-13	5.64119e-17	7.83951e-17	2.2668e-16	2.89091e-15	1.42e-16	1.60995e-25	1.37824e-25	1.22339e-13	3.15123e-17	3.72364e-17	9.38585e-17	0	0	0	0	0	2.37487e-18	3.81641e-40	7.80864e-39		2.09948e-17	1.05526e-17	9.19641e-20
	4.06753e-15	2.02113e-16	1.43605e-25	1.37342e-25	1.93625e-13	3.78844e-17	5.22791e-17	1.53131e-16	2.02052e-15	9.55586e-17	8.553e-26	7.31191e-26	9.13587e-14	2.11626e-17	2.48317e-17	6.34049e-17	0	0	0	0	0	1.59489e-18	1.69256e-40	3.5565e-39		1.38285e-17	6.95061e-18	6.05734e-20
	2.83686e-15	1.35691e-16	7.60111e-26	7.25948e-26	1.44358e-13	2.53838e-17	3.47802e-17	1.03207e-16	1.40919e-15	6.41545e-17	4.52716e-26	3.86486e-26	6.81129e-14	1.41797e-17	1.652e-17	4.27337e-17	0	0	0	0	0	1.06863e-18	7.47859e-41	1.61402e-39		9.08621e-18	4.567e-18	3.98006e-20
	1.97434e-15	9.08834e-17	4.00855e-26	3.82301e-26	1.07452e-13	1.69691e-17	2.30834e-17	6.93993e-17	9.8074e-16	4.29695e-17	2.38746e-26	2.03533e-26	5.06993e-14	9.47912e-18	1.09642e-17	2.87352e-17	0	0	0	0	0	7.14378e-19	3.29221e-41	7.29848e-40		5.95572e-18	2.99352e-18	2.60881e-20
	1.37115e-15	6.07286e-17	2.1062e-26	2.00587e-26	7.9851e-14	1.13179e-17	1.52838e-17	4.65583e-17	6.8111e-16	2.87123e-17	1.25444e-26	1.0679e-26	3.76763e-14	6.32232e-18	7.25957e-18	1.92778e-17	0	0	0	0	0	4.76471e-19	1.4439e-41	3.28848e-40		3.8943e-18	1.95739e-18	1.70584e-20
	9.50227e-16	4.04834e-17	1.10259e-26	1.04857e-26	5.92434e-14	7.53151e-18	1.00955e-17	3.11628e-17	4.72018e-16	1.91405e-17	6.56696e-27	5.58245e-27	2.79529e-14	4.20718e-18	4.79521e-18	1.29031e-17	0	0	0	0	0	3.17067e-19	6.30865e-42	1.47638e-40		2.54021e-18	1.27678e-18	1.1127e-20
	6.57124e-16	2.69238e-17	5.75087e-27	5.46119e-27	4.38826e-14	5.00038e-18	6.65259e-18	2.081e-17	3.26422e-16	1.27295e-17	3.42517e-27	2.90747e-27	2.07052e-14	2.79326e-18	3.15987e-18	8.61653e-18	0	0	0	0	0	2.1051e-19	2.74655e-42	6.60446e-41		1.65292e-18	8.30809e-19	7.24037e-21
	4.53468e-16	1.78637e-17	2.9885e-27	2.83384e-27	3.24518e-14	3.3123e-18	4.37337e-18	1.38646e-17	2.25257e-16	8.4459e-18	1.77993e-27	1.5087e-27	1.53118e-14	1.85029e-18	2.07728e-18	5.74072e-18	0	0	0	0	0	1.39444e-19	1.1911e-42	2.94385e-41		1.07295e-18	5.39298e-19	4.69989e-21
	3.12265e-16	1.18244e-17	1.54731e-27	1.46507e-27	2.39596e-14	2.18909e-18	2.86818e-18	9.21592e-18	1.55115e-16	5.59057e-18	9.21565e-28	7.79988e-28	1.13049e-14	1.22285e-18	1.36234e-18	3.81591e-18	0	0	0	0	0	9.21579e-20	5.14277e-43	1.30741e-41		6.94787e-19	3.49221e-19	3.0434e-21
	2.14575e-16	7.80846e-18	7.98183e-28	7.54641e-28	1.76609e-14	1.44345e-18	1.87655e-18	6.11178e-18	1.06589e-16	3.69182e-18	4.75392e-28	4.01762e-28	8.33296e-15	8.06328e-19	8.9133e-19	2.53062e-18	0	0	0	0	0	6.07676e-20	2.21405e-43	5.78596e-42		4.48815e-19	2.25588e-19	1.96596e-21
	1.47134e-16	5.1443e-18	4.10233e-28	3.87275e-28	1.29969e-14	9.49617e-19	1.22484e-18	4.04384e-18	7.30877e-17	2.43221e-18	2.44332e-28	2.06181e-28	6.13234e-15	5.30466e-19	5.81778e-19	1.67438e-18	0	0	0	0	0	3.99777e-20	9.52883e-44	2.55176e-42		2.89219e-19	1.4537e-19	1.26687e-21
	1.00676e-16	3.38113e-18	2.10069e-28	1.98013e-28	9.54901e-15	6.23304e-19	7.97557e-19	2.66943e-18	5.001e-17	1.59859e-18	1.25115e-28	1.0542e-28	4.50553e-15	3.48184e-19	3.78826e-19	1.10529e-18	0	0	0	0	0	2.62403e-20	4.06377e-44	1.12104e-42		1.85921e-19	9.34496e-20	8.14398e-22
	6.8741e-17	2.21704e-18	1.07175e-28	1.00871e-28	7.00442e-15	4.08186e-19	5.18095e-19	1.75808e-18	3.41466e-17	1.04821e-18	6.38329e-29	5.37026e-29	3.30491e-15	2.28017e-19	2.46086e-19	7.27945e-19	0	0	0	0	0	1.71841e-20	1.68156e-44	4.90454e-43		1.19228e-19	5.99273e-20	5.22257e-22
	4.68366e-17	1.45031e-18	5.44793e-29	5.1196e-29	5.12954e-15	2.667e-19	3.35754e-19	1.1552e-18	2.32657e-17	6.85704e-19	3.24474e-29	2.72561e-29	2.42028e-15	1.48981e-19	1.59477e-19	4.78319e-19	0	0	0	0	0	1.12277e-20	7.00649e-45	2.14399e-43		7.62724e-20	3.83368e-20	3.34099e-22
	3.18444e-17	9.46506e-19	2.75911e-29	2.58882e-29	3.75041e-15	1.73857e-19	2.17069e-19	7.57311e-19	1.58185e-17	4.47506e-19	1.64331e-29	1.37826e-29	1.76956e-15	9.71185e-20	1.03104e-19	3.13569e-19	0	0	0	0	0	7.31917e-21	2.8026e-45	9.24857e-44		4.86746e-20	2.44653e-20	2.13211e-22
	2.16052e-17	6.16256e-19	1.39223e-29	1.30426e-29	2.73762e-15	1.13076e-19	1.40003e-19	4.95322e-19	1.07322e-17	2.91365e-19	8.29202e-30	6.94374e-30	1.29169e-15	6.31653e-20	6.64991e-20	2.05091e-19	0	0	0	0	0	4.76035e-21	1.4013e-45	4.06377e-44		3.09871e-20	1.55751e-20	1.35734e-22
	1.46273e-17	4.0029e-19	6.9993e-30	6.54673e-30	1.99508e-15	7.33757e-20	9.00829e-20	3.2322e-19	7.26599e-18	1.89256e-19	4.16873e-30	3.4854e-30	9.41341e-16	4.09884e-20	4.27878e-20	1.33831e-19	0	0	0	0	0	3.08903e-21	0	1.68156e-44		1.96791e-20	9.89128e-21	8.62009e-23
	9.88202e-18	2.59396e-19	3.50591e-30	3.27402e-30	1.45158e-15	4.75052e-20	5.78244e-20	2.1043e-19	4.90882e-18	1.22642e-19	2.0881e-30	1.74305e-30	6.849e-16	2.65369e-20	2.74656e-20	8.71298e-20	0	0	0	0	0	1.99991e-21	0	7.00649e-45		1.24673e-20	6.26641e-21	5.46108e-23
	6.66204e-18	1.67698e-19	1.74965e-30	1.6313e-30	1.05442e-15	3.06857e-20	3.70292e-20	1.36683e-19	3.30932e-18	7.92872e-20	1.04208e-30	8.68488e-31	4.97509e-16	1.71414e-20	1.75883e-20	5.65943e-20	0	0	0	0	0	1.29183e-21	0	2.8026e-45		7.87919e-21	3.96032e-21	3.45135e-23
	4.48174e-18	1.0816e-19	8.69965e-31	8.09814e-31	7.64682e-16	1.9776e-20	2.36561e-20	8.85761e-20	2.22627e-18	5.11378e-20	5.18144e-31	4.31136e-31	3.60802e-16	1.10471e-20	1.12362e-20	3.66755e-20	0	0	0	0	0	8.32544e-22	0	1.4013e-45		4.96748e-21	2.4968e-21	2.17592e-23
	3.0086e-18	6.95956e-20	4.30979e-31	4.00528e-31	5.53658e-16	1.27159e-20	1.50767e-20	5.72687e-20	1.4945e-18	3.29047e-20	2.56688e-31	2.13237e-31	2.61234e-16	7.10321e-21	7.16116e-21	2.37125e-20	0	0	0	0	0	5.35322e-22	0	0		3.12417e-21	1.5703e-21	1.36849e-23
	2.0154e-18	4.46758e-20	2.12722e-31	1.97368e-31	4.00217e-16	8.15755e-21	9.58587e-21	3.69416e-20	1.00114e-18	2.11226e-20	1.26696e-31	1.05077e-31	1.88835e-16	4.55689e-21	4.55313e-21	1.52959e-20	0	0	0	0	0	3.43422e-22	0	0		1.9601e-21	9.85202e-22	8.58588e-24
	1.34721e-18	2.86113e-20	1.0461e-31	9.68988e-32	2.8883e-16	5.22131e-21	6.08027e-21	2.37745e-20	6.69219e-19	1.35274e-20	6.23047e-32	5.15878e-32	1.36279e-16	2.91668e-21	2.88802e-21	9.84397e-21	0	0	0	0	0	2.19811e-22	0	0		1.22677e-21	6.16612e-22	5.37367e-24
	8.98648e-19	1.82801e-20	5.12547e-32	4.73976e-32	2.08106e-16	3.33431e-21	3.84749e-21	1.52652e-20	4.46397e-19	8.6428e-21	3.05269e-32	2.5234e-32	9.81909e-17	1.86258e-21	1.82749e-21	6.32067e-21	0	0	0	0	0	1.4037e-22	0	0		7.65939e-22	3.84984e-22	3.35507e-24
	5.98166e-19	1.16519e-20	2.50206e-32	2.30989e-32	1.49699e-16	2.12441e-21	2.42883e-21	9.779e-21	2.97135e-19	5.50898e-21	1.49021e-32	1.22976e-32	7.06327e-17	1.18672e-21	1.15365e-21	4.04906e-21	0	0	0	0	0	8.94349e-23	0	0		4.77055e-22	2.39782e-22	2.08966e-24
	3.97312e-19	7.40948e-21	1.21693e-32	1.12156e-32	1.07509e-16	1.35044e-21	1.52961e-21	6.25003e-21	1.97362e-19	3.50319e-21	7.24794e-33	5.97108e-33	5.07263e-17	7.54372e-22	7.2654e-22	2.58787e-21	0	0	0	0	0	5.6852e-23	0	0		2.96406e-22	1.48982e-22	1.29836e-24
	2.63342e-19	4.70062e-21	5.89705e-33	5.42566e-33	7.70845e-17	8.56488e-22	9.61014e-22	3.98536e-21	1.30813e-19	2.22244e-21	3.51224e-33	2.88856e-33	3.63709e-17	4.78443e-22	4.56466e-22	1.65016e-21	0	0	0	0	0	3.60571e-23	0	0		1.83717e-22	9.23415e-23	8.04741e-25
	1.74176e-19	2.97507e-21	2.84713e-33	2.61504e-33	5.51799e-17	5.41967e-22	6.02341e-22	2.53542e-21	8.65205e-20	1.40661e-21	1.69573e-33	1.39222e-33	2.60357e-17	3.02748e-22	2.86102e-22	1.04981e-21	0	0	0	0	0	2.28161e-23	0	0		1.13594e-22	5.70956e-23	4.97579e-25
	1.14956e-19	1.87852e-21	1.36956e-33	1.25574e-33	3.94357e-17	3.4216e-22	3.76634e-22	1.60928e-21	5.71037e-20	8.88161e-22	8.15701e-34	6.68544e-34	1.8607e-17	1.91134e-22	1.78895e-22	6.66331e-22	0	0	0	0	0	1.44045e-23	0	0		7.00656e-23	3.5217e-23	3.06911e-25
	7.57106e-20	1.18334e-21	6.56386e-34	6.00788e-34	2.81378e-17	2.15523e-22	2.34942e-22	1.01908e-21	3.76087e-20	5.59481e-22	3.90938e-34	3.19852e-34	1.32763e-17	1.20393e-22	1.11594e-22	4.21956e-22	0	0	0	0	0	9.07324e-24	0	0		4.3112e-23	2.16694e-23	1.88845e-25

## Sheet: Figure 6 - F_G_H
F											G			H
cAMP concentration (uM)	Experiment1	Experiment2	Experiment3	Experiment4	Experiment5	Experiment6	Experiment7	Experiment8			Fraction A2 - Apo			Fraction A2 - cAMP
0	0.46597	0.332076	0.299234	0.283798	0.422914	0.416325	0.437399	0.438375			SthK Full	SthK Cterm		SthK Full	SthK Cterm
0.25							0.62573	0.514631			0.274882	0.0660614		0.979673	0.924654
0.5	0.701685	0.684852	0.668679	0.644232	0.761054	0.722764	0.668198	0.706011			0.355489	0.124045		0.989983	0.955816
1							0.772559	0.797857			0.4697	0.127987		1	0.960067
2							0.856322	0.857847			0.529537	0.178899		1	1
320	0.977518	1	1	1	1	1	1	1
