# Supplementary material for: Domain coupling in allosteric regulation of SthK measured using time-resolved transition metal ion FRET
Source: eLife. 2025 Aug 12;14:RP106892. doi: 10.7554/eLife.106892 (PMC12342821; doi:10.7554/eLife.106892)
Supplement: Figure 8—figure supplement 1—source data 1. [file elife-106892-fig8-figsupp1-data1.xlsx]

## Sheet: supplemental figure 1
A			B					C					D
			Resting		Active			Resting		Active			0uM cAMP		0.5uM cAMP		1uM cAMP		320uM cAMP
fraction donor only (fD)	reduced 𝟀^2		average distance (r)	reduced 𝟀^2	average distance (r)	reduced 𝟀^2		standard deviation (r)	reduced 𝟀^2	standard deviation (r)	reduced 𝟀^2		fraction A2	reduced 𝟀^2	fraction A2	reduced 𝟀^2	fraction A2	reduced 𝟀^2	fraction A2	reduced 𝟀^2
0	2.46885		30	3.93132	18	2.18047		0.1	1.05407	0.1	1.05228		0	1.04795	0	1.20536	0.145083	1.36515	0.8	1.37972
0.006	2.33276		30.4	3.81118	18.4	2.13816		0.398	1.0535	0.398	1.0515		0.008	1.04696	0.012	1.19401	0.149142	1.34688	0.804	1.36307
0.012	2.19607		30.8	3.70243	18.8	2.09338		0.696	1.0523	0.696	1.04996		0.016	1.04607	0.024	1.18288	0.153241	1.32886	0.808	1.34668
0.018	2.06025		31.2	3.60577	19.201	2.04758		0.994	1.05062	0.994	1.04798		0.024	1.0453	0.036	1.172	0.157378	1.31114	0.812	1.33056
0.024	1.927		31.6	3.50833	19.6	2.00678		1.292	1.04867	1.292	1.04596		0.032	1.04465	0.048	1.16139	0.16157	1.29376	0.816	1.31474
0.03	1.79814		32	3.41025	20	1.95453		1.59	1.0467	1.59	1.04434		0.04	1.04413	0.06	1.15109	0.165796	1.27671	0.82	1.29921
0.036	1.67434		32.4	3.30936	20.4	1.90558		1.888	1.04498	1.888	1.0435		0.048	1.04375	0.072	1.1411	0.170001	1.26008	0.824	1.28401
0.042	1.55543		32.8	3.20712	20.8	1.85578		2.186	1.04381	2.186	1.04371		0.056	1.04352	0.084	1.13147	0.174219	1.24384	0.828	1.26915
0.048	1.44463		33.2	3.10328	21.2	1.80464		2.484	1.04345	2.484	1.04516		0.064	1.04344	0.096	1.12222	0.178471	1.22799	0.832	1.25463
0.054	1.34571		33.6	2.9979	21.6	1.75268		2.782	1.04411	2.782	1.04792		0.072	1.04352	0.108	1.11344	0.182753	1.21257	0.836	1.24049
0.06	1.26045		34	2.88802	22	1.70043		3.08	1.046	3.08	1.05199		0.08	1.04378	0.12	1.10508	0.187062	1.19759	0.84	1.22673
0.066	1.18959		34.4	2.77658	22.4	1.64803		3.378	1.04922	3.378	1.05729		0.088	1.04422	0.132	1.09715	0.191394	1.18311	0.844	1.21338
0.072	1.13336		34.8	2.66491	22.8	1.59588		3.676	1.05434	3.676	1.06371		0.096	1.04484	0.144	1.0897	0.195739	1.16914	0.848	1.20044
0.078	1.09154		35.2	2.5493	23.2	1.54442		3.974	1.06324	3.974	1.07263		0.104	1.04567	0.156	1.08274	0.200104	1.15574	0.852	1.18795
0.084	1.06318		35.6	2.42667	23.6	1.49328		4.272	1.07633	4.272	1.08511		0.112	1.04671	0.168	1.07632	0.204485	1.14294	0.856	1.17591
0.09	1.04725		36	2.30713	24	1.44247		4.57	1.09378	4.57	1.10106		0.12	1.04797	0.18	1.07045	0.208878	1.13078	0.86	1.16435
0.096	1.04373		36.4	2.18865	24.4	1.39367		4.868	1.11569	4.868	1.12038		0.128	1.04945	0.192	1.06519	0.213285	1.11932	0.864	1.15328
0.102	1.05265		36.8	2.06984	24.8	1.34718		5.166	1.1421	5.166	1.14299		0.136	1.05118	0.204	1.06056	0.217698	1.1086	0.868	1.14272
0.108	1.07405		37.2	1.95118	25.2	1.30339		5.464	1.17298	5.464	1.1688		0.144	1.05315	0.216	1.05659	0.222127	1.09869	0.872	1.13269
0.114	1.11242		37.6	1.83328	25.6	1.26192		5.762	1.20825	5.762	1.19777		0.152	1.05539	0.228	1.05333	0.226694	1.08962	0.876	1.12321
0.12	1.17017		38	1.71737	26	1.22344		6.06	1.24721	6.06	1.2299		0.16	1.0579	0.24	1.05062	0.231409	1.08136	0.88	1.11428
0.126	1.24663		38.4	1.60511	26.4	1.18818		6.358	1.29008	6.358	1.26403		0.168	1.06069	0.252	1.04828	0.236143	1.07395	0.884	1.10594
0.132	1.34232		38.8	1.4989	26.8	1.15346		6.656	1.33664	6.656	1.29927		0.176	1.06377	0.264	1.04635	0.240899	1.0674	0.888	1.09819
0.138	1.46464		39.2	1.40115	27.2	1.12088		6.954	1.38665	6.954	1.3368		0.184	1.06699	0.276	1.04487	0.245686	1.06175	0.892	1.09105
0.144	1.61333		39.6	1.30862	27.6	1.09278		7.252	1.43977	7.252	1.37645		0.192	1.07064	0.288	1.04389	0.250502	1.05703	0.896	1.08453
0.15	1.78797		40	1.22269	28	1.06937		7.55	1.49584	7.55	1.418		0.2	1.07479	0.3	1.04346	0.259339	1.05312	0.9	1.07866
0.156	1.98771		40.4	1.14702	28.4	1.05211		7.848	1.55454	7.848	1.46132		0.208	1.07944	0.312	1.04361	0.268516	1.0498	0.904	1.07343
0.162	2.21188		40.8	1.08781	28.8	1.04373		8.146	1.61558	8.146	1.50628		0.216	1.08461	0.324	1.04441	0.277402	1.04711	0.908	1.06881
0.168	2.46012		41.2	1.05339	29.2	1.04791		8.444	1.67865	8.444	1.55187		0.224	1.09027	0.336	1.04589	0.286035	1.04513	0.912	1.06471
0.174	2.73266		41.6	1.0437	29.6	1.06836		8.742	1.74348	8.742	1.5972		0.232	1.09644	0.348	1.04809	0.29444	1.04389	0.916	1.06114
0.18	3.03304		42	1.05039	30	1.10835		9.04	1.80976	9.04	1.64317		0.24	1.10312	0.36	1.05107	0.302661	1.04344	0.92	1.05793
0.186	3.36241		42.4	1.08308	30.4	1.1737		9.338	1.87674	9.338	1.68957		0.248	1.11029	0.372	1.05486	0.310672	1.04382	0.924	1.05504
0.192	3.7156		42.8	1.15334	30.8	1.26389		9.636	1.94508	9.636	1.73594		0.256	1.11795	0.384	1.05949	0.318553	1.04506	0.928	1.05248
0.198	4.08076		43.2	1.26261	31.2	1.38236		9.934	2.01457	9.934	1.78253		0.264	1.1261	0.396	1.065	0.326315	1.04718	0.932	1.05024
0.204	4.47095		43.6	1.40734	31.6	1.53024		10.232	2.08505	10.232	1.82899		0.272	1.13472	0.408	1.07142	0.33398	1.05019	0.936	1.04832
0.21	4.88657		44	1.58317	32	1.70536		10.53	2.15634	10.53	1.87516		0.28	1.14379	0.42	1.07887	0.34153	1.05411	0.94	1.04673
0.216	5.3187		44.4	1.78445	32.4	1.9042		10.828	2.22822	10.828	1.92093		0.288	1.15336	0.432	1.08757	0.349016	1.0589	0.944	1.04546
0.222	5.77552		44.8	2.00458	32.8	2.12159		11.126	2.30062	11.126	1.96618		0.296	1.16354	0.444	1.09747	0.356434	1.06456	0.948	1.0445
0.228	6.25107		45.2	2.2371	33.2	2.35127		11.424	2.37228	11.424	2.01052		0.304	1.17435	0.456	1.10886	0.363789	1.07105	0.952	1.04385
0.234	6.74648		45.6	2.4755	33.6	2.58657		11.722	2.44464	11.722	2.05436		0.312	1.1858	0.468	1.1221	0.37047	1.0786	0.956	1.04351
0.24	7.26144		46	2.71377	34	2.82036		12.02	2.51696	12.02	2.09744		0.32	1.1979	0.48	1.13712	0.376828	1.08796	0.96	1.04345
0.246	8.86874		46.4	2.94688	34.4	3.0447		12.318	2.58921	12.318	2.13977		0.328	1.21067	0.492	1.15407	0.38311	1.09926	0.964	1.04369
0.252	8.36732		46.8	3.17249	34.8	3.24925		12.616	2.66128	12.616	2.18076		0.336	1.22411	0.504	1.17304	0.388402	1.11262	0.968	1.04419
0.258	8.97706		47.2	3.38297	35.2	3.42714		12.914	2.73157	12.914	2.22099		0.344	1.23824	0.516	1.19411	0.392718	1.12825	0.972	1.04496
0.264	9.91987		47.6	3.57487	35.6	3.58049		13.212	2.80261	13.212	2.26062		0.352	1.25308	0.528	1.21738	0.397118	1.14629	0.976	1.04599
0.27	10.0922		48	3.74934	36	3.73772		13.51	2.87295	13.51	2.2987		0.36	1.26864	0.54	1.24287	0.401587	1.16685	0.98	1.04725
0.276	10.6261		48.4	3.9032	36.4	3.90038		13.808	2.94309	13.808	2.33603		0.368	1.28494	0.552	1.27075	0.40611	1.19004	0.984	1.04874
0.282	11.2081		48.8	4.05443	36.8	4.06716		14.106	3.01342	14.106	2.3724		0.376	1.30198	0.564	1.3012	0.410678	1.21599	0.988	1.05045
0.288	12.1879		49.2	4.17599	37.2	4.23693		14.404	3.08438	14.404	2.40759		0.384	1.31981	0.576	1.33438	0.415263	1.24483	0.992	1.05236
0.294	12.4285		49.6	4.28726	37.6	4.41326		14.702	3.15438	14.702	2.44213		0.392	1.33842	0.588	1.37052	0.419846	1.27667	0.996	1.05445
0.3	13.0518		50	4.3885	38	4.58401		15	3.22815	15	2.4751		0.4	1.35784	0.6	1.40987	0.424402	1.31158	1	1.05671
