# Supplementary material for: Domain coupling in allosteric regulation of SthK measured using time-resolved transition metal ion FRET
Source: eLife. 2025 Aug 12;14:RP106892. doi: 10.7554/eLife.106892 (PMC12342821; doi:10.7554/eLife.106892)
Supplement: Figure 8—figure supplement 2—source data 1. [file elife-106892-fig8-figsupp2-data1.xlsx]

## Sheet: Supplemental figure 2
A				B				C				D				E				F
fraction donor only FD	Standard Deviation (sig 1)	Reduced 𝟀^2		fraction donor only FD	Standard Deviation (sig 2)	Reduced 𝟀^2		fraction donor only FD	fraction short Gaussian (fA2), 0uM cAMP	Reduced 𝟀^2		fraction donor only FD	fraction short Gaussian (fA2), 320uM cAMP	Reduced 𝟀^2		average distance (r1)	Standard Deviation (sig 1)	Reduced 𝟀^2		average distance (r1)	Standard Deviation (sig 2)	Reduced 𝟀^2
0	0.4	3.74325		0	0.4	2.47091		0	0	2.46875		0	0.8	2.80385		37	0.4	5.03956		37	0.4	2.01284
0	0.704	3.72918		0	0.704	2.47586		0	0.008	2.47371		0	0.808	2.84483		37	0.704	4.98593		37	0.704	2.01212
0	1.008	3.70761		0	1.008	2.48369		0	0.016	2.47891		0	0.816	2.89509		37	1.008	4.90558		37	1.008	2.01129
0	1.312	3.67874		0	1.312	2.49448		0	0.024	2.48429		0	0.824	2.95156		37	1.312	4.80049		37	1.312	2.01061
0	1.616	3.64291		0	1.616	2.50831		0	0.032	2.48987		0	0.832	3.01415		37	1.616	4.67387		37	1.616	2.01036
0	1.92	3.6006		0	1.92	2.52516		0	0.04	2.49565		0	0.84	3.08344		37	1.92	4.52979		37	1.92	2.01076
0	2.224	3.5524		0	2.224	2.54496		0	0.048	2.50164		0	0.848	3.16016		37	2.224	4.37092		37	2.224	2.01199
0	2.528	3.49903		0	2.528	2.56756		0	0.056	2.50784		0	0.856	3.245		37	2.528	4.2016		37	2.528	2.01417
0	2.832	3.44133		0	2.832	2.5928		0	0.064	2.51426		0	0.864	3.33836		37	2.832	4.02562		37	2.832	2.01735
0	3.136	3.38022		0	3.136	2.62047		0	0.072	2.52091		0	0.872	3.4398		37	3.136	3.84648		37	3.136	2.02156
0	3.44	3.31664		0	3.44	2.6504		0	0.08	2.52781		0	0.88	3.54684		37	3.44	3.66748		37	3.44	2.02682
0	3.744	3.25159		0	3.744	2.68242		0	0.088	2.53496		0	0.888	3.64878		37	3.744	3.49127		37	3.744	2.03313
0	4.048	3.18601		0	4.048	2.71643		0	0.096	2.54237		0	0.896	3.58482		37	4.048	3.32109		37	4.048	2.04048
0	4.352	3.12078		0	4.352	2.75185		0	0.104	2.55005		0	0.904	3.58049		37	4.352	3.15888		37	4.352	2.0489
0	4.656	3.05671		0	4.656	2.78957		0	0.112	2.55801		0	0.912	3.57275		37	4.656	3.00595		37	4.656	2.05843
0	4.96	2.99449		0	4.96	2.82703		0	0.12	2.56627		0	0.92	3.56618		37	4.96	2.86143		37	4.96	2.06906
0	5.264	2.9347		0	5.264	2.8648		0	0.128	2.57483		0	0.928	3.55957		37	5.264	2.72687		37	5.264	2.08046
0	5.568	2.87779		0	5.568	2.90304		0	0.136	2.58372		0	0.936	3.55266		37	5.568	2.60308		37	5.568	2.09066
0	5.872	2.82409		0	5.872	2.94091		0	0.144	2.59294		0	0.944	3.54529		37	5.872	2.49051		37	5.872	2.10145
0	6.176	2.77384		0	6.176	2.97668		0	0.152	2.60251		0	0.952	3.53733		37	6.176	2.38955		37	6.176	2.1149
0	6.48	2.72716		0	6.48	3.0153		0	0.16	2.61245		0	0.96	3.52869		37	6.48	2.30046		37	6.48	2.13164
0	6.784	2.68408		0	6.784	3.05407		0	0.168	2.62276		0	0.968	3.51931		37	6.784	2.22338		37	6.784	2.15145
0	7.088	2.64458		0	7.088	3.09221		0	0.176	2.63348		0	0.976	3.50915		37	7.088	2.15836		37	7.088	2.17407
0	7.392	2.60855		0	7.392	3.12943		0	0.184	2.64461		0	0.984	3.49815		37	7.392	2.10538		37	7.392	2.19925
0	7.696	2.57587		0	7.696	3.16191		0	0.192	2.65618		0	0.992	3.48629		37	7.696	2.06432		37	7.696	2.22671
0	8	2.54636		0	8	3.19676		0	0.2	2.6682		0	1	3.47353		37	8	2.035		37	8	2.25617
0.0064	0.4	3.53145		0.0064	0.4	2.3253		0.0064	0	2.32353		0.0064	0.8	2.52288		37.32	0.4	4.49109		37.32	0.4	1.91872
0.0064	0.704	3.51671		0.0064	0.704	2.32922		0.0064	0.008	2.32847		0.0064	0.808	2.55669		37.32	0.704	4.44429		37.32	0.704	1.9179
0.0064	1.008	3.49418		0.0064	1.008	2.3355		0.0064	0.016	2.33358		0.0064	0.816	2.59362		37.32	1.008	4.37325		37.32	1.008	1.91692
0.0064	1.312	3.46412		0.0064	1.312	2.34424		0.0064	0.024	2.33888		0.0064	0.824	2.63427		37.32	1.312	4.28027		37.32	1.312	1.91606
0.0064	1.616	3.42693		0.0064	1.616	2.35555		0.0064	0.032	2.34437		0.0064	0.832	2.67931		37.32	1.616	4.16833		37.32	1.616	1.9156
0.0064	1.92	3.38321		0.0064	1.92	2.36946		0.0064	0.04	2.35006		0.0064	0.84	2.72941		37.32	1.92	4.04062		37.32	1.92	1.91579
0.0064	2.224	3.33363		0.0064	2.224	2.38593		0.0064	0.048	2.35596		0.0064	0.848	2.78514		37.32	2.224	3.90046		37.32	2.224	1.91682
0.0064	2.528	3.27904		0.0064	2.528	2.40488		0.0064	0.056	2.36207		0.0064	0.856	2.84717		37.32	2.528	3.75134		37.32	2.528	1.91881
0.0064	2.832	3.22036		0.0064	2.832	2.42621		0.0064	0.064	2.36841		0.0064	0.864	2.9162		37.32	2.832	3.5966		37.32	2.832	1.92181
0.0064	3.136	3.15859		0.0064	3.136	2.44982		0.0064	0.072	2.37498		0.0064	0.872	2.99267		37.32	3.136	3.43917		37.32	3.136	1.92586
0.0064	3.44	3.09477		0.0064	3.44	2.47565		0.0064	0.08	2.3818		0.0064	0.88	3.07656		37.32	3.44	3.28237		37.32	3.44	1.93095
0.0064	3.744	3.0299		0.0064	3.744	2.50378		0.0064	0.088	2.38887		0.0064	0.888	3.16611		37.32	3.744	3.12866		37.32	3.744	1.93708
0.0064	4.048	2.96497		0.0064	4.048	2.53449		0.0064	0.096	2.3962		0.0064	0.896	3.25403		37.32	4.048	2.98072		37.32	4.048	1.94423
0.0064	4.352	2.90087		0.0064	4.352	2.56473		0.0064	0.104	2.40381		0.0064	0.904	3.28253		37.32	4.352	2.8403		37.32	4.352	1.95239
0.0064	4.656	2.83838		0.0064	4.656	2.59567		0.0064	0.112	2.41171		0.0064	0.912	3.28912		37.32	4.656	2.70724		37.32	4.656	1.96157
0.0064	4.96	2.77818		0.0064	4.96	2.62777		0.0064	0.12	2.4199		0.0064	0.92	3.28975		37.32	4.96	2.58232		37.32	4.96	1.97175
0.0064	5.264	2.7208		0.0064	5.264	2.66086		0.0064	0.128	2.42841		0.0064	0.928	3.28332		37.32	5.264	2.46693		37.32	5.264	1.98275
0.0064	5.568	2.66664		0.0064	5.568	2.69474		0.0064	0.136	2.43724		0.0064	0.936	3.27224		37.32	5.568	2.36163		37.32	5.568	1.99399
0.0064	5.872	2.61598		0.0064	5.872	2.72921		0.0064	0.144	2.44641		0.0064	0.944	3.26198		37.32	5.872	2.26694		37.32	5.872	2.00597
0.0064	6.176	2.569		0.0064	6.176	2.76405		0.0064	0.152	2.45594		0.0064	0.952	3.25231		37.32	6.176	2.18326		37.32	6.176	2.02134
0.0064	6.48	2.52575		0.0064	6.48	2.79904		0.0064	0.16	2.46584		0.0064	0.96	3.24276		37.32	6.48	2.11085		37.32	6.48	2.0399
0.0064	6.784	2.48623		0.0064	6.784	2.83394		0.0064	0.168	2.47613		0.0064	0.968	3.233		37.32	6.784	2.04986		37.32	6.784	2.06143
0.0064	7.088	2.45033		0.0064	7.088	2.86855		0.0064	0.176	2.48682		0.0064	0.976	3.22256		37.32	7.088	2.00035		37.32	7.088	2.08569
0.0064	7.392	2.41787		0.0064	7.392	2.90264		0.0064	0.184	2.49794		0.0064	0.984	3.21123		37.32	7.392	1.96231		37.32	7.392	2.11243
0.0064	7.696	2.38865		0.0064	7.696	2.93601		0.0064	0.192	2.5095		0.0064	0.992	3.19918		37.32	7.696	1.93564		37.32	7.696	2.14137
0.0064	8	2.36299		0.0064	8	2.96848		0.0064	0.2	2.52153		0.0064	1	3.18636		37.32	8	1.92016		37.32	8	2.17224
0.0128	0.4	3.71187		0.0128	0.4	2.17904		0.0128	0	2.17777		0.0128	0.8	2.28487		37.64	0.4	3.98997		37.64	0.4	1.82522
0.0128	0.704	3.70192		0.0128	0.704	2.18194		0.0128	0.008	2.18255		0.0128	0.808	2.30933		37.64	0.704	3.94863		37.64	0.704	1.82431
0.0128	1.008	3.68634		0.0128	1.008	2.18662		0.0128	0.016	2.1875		0.0128	0.816	2.33422		37.64	1.008	3.88614		37.64	1.008	1.82321
0.0128	1.312	3.66218		0.0128	1.312	2.19325		0.0128	0.024	2.19265		0.0128	0.824	2.36115		37.64	1.312	3.80448		37.64	1.312	1.82219
0.0128	1.616	3.63592		0.0128	1.616	2.20197		0.0128	0.032	2.19798		0.0128	0.832	2.39091		37.64	1.616	3.70614		37.64	1.616	1.82157
0.0128	1.92	3.6046		0.0128	1.92	2.21285		0.0128	0.04	2.20352		0.0128	0.84	2.42401		37.64	1.92	3.59402		37.64	1.92	1.8216
0.0128	2.224	3.56888		0.0128	2.224	2.22591		0.0128	0.048	2.20926		0.0128	0.848	2.46107		37.64	2.224	3.471		37.64	2.224	1.82248
0.0128	2.528	3.52749		0.0128	2.528	2.24114		0.0128	0.056	2.21522		0.0128	0.856	2.50274		37.64	2.528	3.34038		37.64	2.528	1.82433
0.0128	2.832	3.48503		0.0128	2.832	2.2585		0.0128	0.064	2.22141		0.0128	0.864	2.54962		37.64	2.832	3.2048		37.64	2.832	1.82721
0.0128	3.136	3.43854		0.0128	3.136	2.27803		0.0128	0.072	2.22783		0.0128	0.872	2.60244		37.64	3.136	3.06742		37.64	3.136	1.83115
0.0128	3.44	3.39184		0.0128	3.44	2.29989		0.0128	0.08	2.2345		0.0128	0.88	2.66155		37.64	3.44	2.93093		37.64	3.44	1.83614
0.0128	3.744	3.34257		0.0128	3.744	2.32456		0.0128	0.088	2.24143		0.0128	0.888	2.72705		37.64	3.744	2.79805		37.64	3.744	1.84215
0.0128	4.048	3.29387		0.0128	4.048	2.34794		0.0128	0.096	2.24862		0.0128	0.896	2.79792		37.64	4.048	2.67076		37.64	4.048	1.84915
0.0128	4.352	3.24446		0.0128	4.352	2.37268		0.0128	0.104	2.25609		0.0128	0.904	2.86897		37.64	4.352	2.54939		37.64	4.352	1.85712
0.0128	4.656	3.19501		0.0128	4.656	2.39886		0.0128	0.112	2.26385		0.0128	0.912	2.93138		37.64	4.656	2.43497		37.64	4.656	1.86603
0.0128	4.96	3.14794		0.0128	4.96	2.42636		0.0128	0.12	2.27192		0.0128	0.92	2.96969		37.64	4.96	2.32857		37.64	4.96	1.87585
0.0128	5.264	3.10369		0.0128	5.264	2.45504		0.0128	0.128	2.2803		0.0128	0.928	2.98412		37.64	5.264	2.23105		37.64	5.264	1.88639
0.0128	5.568	3.06252		0.0128	5.568	2.48476		0.0128	0.136	2.28901		0.0128	0.936	2.9881		37.64	5.568	2.14312		37.64	5.568	1.89933
0.0128	5.872	3.02466		0.0128	5.872	2.51531		0.0128	0.144	2.29807		0.0128	0.944	2.9856		37.64	5.872	2.06528		37.64	5.872	1.91345
0.0128	6.176	2.99063		0.0128	6.176	2.54648		0.0128	0.152	2.30749		0.0128	0.952	2.97698		37.64	6.176	1.99793		37.64	6.176	1.93072
0.0128	6.48	2.95982		0.0128	6.48	2.57805		0.0128	0.16	2.31728		0.0128	0.96	2.9637		37.64	6.48	1.94131		37.64	6.48	1.95107
0.0128	6.784	2.93213		0.0128	6.784	2.60979		0.0128	0.168	2.32747		0.0128	0.968	2.94674		37.64	6.784	1.8956		37.64	6.784	1.9743
0.0128	7.088	2.9102		0.0128	7.088	2.64145		0.0128	0.176	2.33808		0.0128	0.976	2.93068		37.64	7.088	1.86086		37.64	7.088	2.00017
0.0128	7.392	2.89578		0.0128	7.392	2.6728		0.0128	0.184	2.34911		0.0128	0.984	2.91553		37.64	7.392	1.83708		37.64	7.392	2.02844
0.0128	7.696	2.88779		0.0128	7.696	2.70361		0.0128	0.192	2.3606		0.0128	0.992	2.90083		37.64	7.696	1.82416		37.64	7.696	2.05884
0.0128	8	2.88643		0.0128	8	2.73367		0.0128	0.2	2.37256		0.0128	1	2.88619		37.64	8	1.82193		37.64	8	2.09111
0.0192	0.4	3.41974		0.0192	0.4	2.03404		0.0192	0	2.03324		0.0192	0.8	2.07859		37.96	0.4	3.53643		37.96	0.4	1.73294
0.0192	0.704	3.40794		0.0192	0.704	2.03591		0.0192	0.008	2.03779		0.0192	0.808	2.09386		37.96	0.704	3.50018		37.96	0.704	1.73197
0.0192	1.008	3.38995		0.0192	1.008	2.03902		0.0192	0.016	2.04253		0.0192	0.816	2.1113		37.96	1.008	3.44546		37.96	1.008	1.73076
0.0192	1.312	3.366		0.0192	1.312	2.04357		0.0192	0.024	2.04745		0.0192	0.824	2.1311		37.96	1.312	3.37385		37.96	1.312	1.72963
0.0192	1.616	3.3365		0.0192	1.616	2.04973		0.0192	0.032	2.05256		0.0192	0.832	2.14983		37.96	1.616	3.2877		37.96	1.616	1.72889
0.0192	1.92	3.30196		0.0192	1.92	2.05764		0.0192	0.04	2.05788		0.0192	0.84	2.17068		37.96	1.92	3.18949		37.96	1.92	1.7288
0.0192	2.224	3.26301		0.0192	2.224	2.06737		0.0192	0.048	2.0634		0.0192	0.848	2.19404		37.96	2.224	3.08192		37.96	2.224	1.72958
0.0192	2.528	3.22036		0.0192	2.528	2.07897		0.0192	0.056	2.06914		0.0192	0.856	2.22038		37.96	2.528	2.96776		37.96	2.528	1.73134
0.0192	2.832	3.1748		0.0192	2.832	2.09249		0.0192	0.064	2.07511		0.0192	0.864	2.25022		37.96	2.832	2.84979		37.96	2.832	1.73416
0.0192	3.136	3.12719		0.0192	3.136	2.10812		0.0192	0.072	2.08132		0.0192	0.872	2.28404		37.96	3.136	2.7307		37.96	3.136	1.73804
0.0192	3.44	3.07837		0.0192	3.44	2.12609		0.0192	0.08	2.08778		0.0192	0.88	2.3224		37.96	3.44	2.61335		37.96	3.44	1.74297
0.0192	3.744	3.0292		0.0192	3.744	2.14442		0.0192	0.088	2.09449		0.0192	0.888	2.36569		37.96	3.744	2.49967		37.96	3.744	1.74892
0.0192	4.048	2.98049		0.0192	4.048	2.16293		0.0192	0.096	2.10147		0.0192	0.896	2.41411		37.96	4.048	2.39049		37.96	4.048	1.75583
0.0192	4.352	2.93297		0.0192	4.352	2.18296		0.0192	0.104	2.10874		0.0192	0.904	2.46726		37.96	4.352	2.28685		37.96	4.352	1.76367
0.0192	4.656	2.88531		0.0192	4.656	2.20449		0.0192	0.112	2.1163		0.0192	0.912	2.52341		37.96	4.656	2.18967		37.96	4.656	1.77238
0.0192	4.96	2.83962		0.0192	4.96	2.22745		0.0192	0.12	2.12416		0.0192	0.92	2.57808		37.96	4.96	2.10029		37.96	4.96	1.7819
0.0192	5.264	2.79746		0.0192	5.264	2.25176		0.0192	0.128	2.13235		0.0192	0.928	2.62636		37.96	5.264	2.01945		37.96	5.264	1.79268
0.0192	5.568	2.75912		0.0192	5.568	2.27727		0.0192	0.136	2.14087		0.0192	0.936	2.66277		37.96	5.568	1.94777		37.96	5.568	1.80755
0.0192	5.872	2.72464		0.0192	5.872	2.30382		0.0192	0.144	2.14974		0.0192	0.944	2.68484		37.96	5.872	1.88576		37.96	5.872	1.82437
0.0192	6.176	2.6935		0.0192	6.176	2.33119		0.0192	0.152	2.15898		0.0192	0.952	2.69512		37.96	6.176	1.83378		37.96	6.176	1.84348
0.0192	6.48	2.66731		0.0192	6.48	2.35918		0.0192	0.16	2.1686		0.0192	0.96	2.69755		37.96	6.48	1.79209		37.96	6.48	1.86559
0.0192	6.784	2.64862		0.0192	6.784	2.38755		0.0192	0.168	2.17861		0.0192	0.968	2.69323		37.96	6.784	1.76085		37.96	6.784	1.89048
0.0192	7.088	2.6373		0.0192	7.088	2.41606		0.0192	0.176	2.18905		0.0192	0.976	2.684		37.96	7.088	1.74014		37.96	7.088	1.91793
0.0192	7.392	2.63269		0.0192	7.392	2.44446		0.0192	0.184	2.19993		0.0192	0.984	2.67103		37.96	7.392	1.72993		37.96	7.392	1.94769
0.0192	7.696	2.63503		0.0192	7.696	2.47226		0.0192	0.192	2.21141		0.0192	0.992	2.65517		37.96	7.696	1.73015		37.96	7.696	1.97953
0.0192	8	2.64412		0.0192	8	2.49849		0.0192	0.2	2.22299		0.0192	1	2.6367		37.96	8	1.74058		37.96	8	2.01316
0.0256	0.4	3.10912		0.0256	0.4	1.8924		0.0256	0	1.89204		0.0256	0.8	1.90398		38.28	0.4	3.1289		38.28	0.4	1.64274
0.0256	0.704	3.09704		0.0256	0.704	1.89329		0.0256	0.008	1.89631		0.0256	0.808	1.91166		38.28	0.704	3.09713		38.28	0.704	1.64171
0.0256	1.008	3.07895		0.0256	1.008	1.89492		0.0256	0.016	1.90076		0.0256	0.816	1.92104		38.28	1.008	3.04948		38.28	1.008	1.64044
0.0256	1.312	3.05502		0.0256	1.312	1.89752		0.0256	0.024	1.9054		0.0256	0.824	1.93214		38.28	1.312	2.98698		38.28	1.312	1.63922
0.0256	1.616	3.02573		0.0256	1.616	1.90131		0.0256	0.032	1.91023		0.0256	0.832	1.94515		38.28	1.616	2.91169		38.28	1.616	1.63839
0.0256	1.92	2.9917		0.0256	1.92	1.90646		0.0256	0.04	1.91526		0.0256	0.84	1.95986		38.28	1.92	2.82598		38.28	1.92	1.63823
0.0256	2.224	2.95366		0.0256	2.224	1.91309		0.0256	0.048	1.9205		0.0256	0.848	1.97369		38.28	2.224	2.73235		38.28	2.224	1.63895
0.0256	2.528	2.9124		0.0256	2.528	1.92133		0.0256	0.056	1.92595		0.0256	0.856	1.98936		38.28	2.528	2.63334		38.28	2.528	1.64068
0.0256	2.832	2.86879		0.0256	2.832	1.93122		0.0256	0.064	1.93164		0.0256	0.864	2.00728		38.28	2.832	2.53161		38.28	2.832	1.64347
0.0256	3.136	2.82371		0.0256	3.136	1.94303		0.0256	0.072	1.93757		0.0256	0.872	2.02782		38.28	3.136	2.42966		38.28	3.136	1.64735
0.0256	3.44	2.77801		0.0256	3.44	1.95713		0.0256	0.08	1.94374		0.0256	0.88	2.05142		38.28	3.44	2.32971		38.28	3.44	1.65228
0.0256	3.744	2.73255		0.0256	3.744	1.97042		0.0256	0.088	1.95018		0.0256	0.888	2.07848		38.28	3.744	2.23269		38.28	3.744	1.65821
0.0256	4.048	2.68659		0.0256	4.048	1.98464		0.0256	0.096	1.95689		0.0256	0.896	2.10927		38.28	4.048	2.13978		38.28	4.048	1.66509
0.0256	4.352	2.64149		0.0256	4.352	2.00038		0.0256	0.104	1.96388		0.0256	0.904	2.14406		38.28	4.352	2.05229		38.28	4.352	1.67285
0.0256	4.656	2.59906		0.0256	4.656	2.01764		0.0256	0.112	1.9712		0.0256	0.912	2.18271		38.28	4.656	1.97124		38.28	4.656	1.68141
0.0256	4.96	2.55987		0.0256	4.96	2.0364		0.0256	0.12	1.97872		0.0256	0.92	2.22474		38.28	4.96	1.89767		38.28	4.96	1.69081
0.0256	5.264	2.52414		0.0256	5.264	2.05659		0.0256	0.128	1.98656		0.0256	0.928	2.26816		38.28	5.264	1.83232		38.28	5.264	1.70337
0.0256	5.568	2.49201		0.0256	5.568	2.07809		0.0256	0.136	1.99469		0.0256	0.936	2.30978		38.28	5.568	1.7758		38.28	5.568	1.71998
0.0256	5.872	2.46318		0.0256	5.872	2.10075		0.0256	0.144	2.00313		0.0256	0.944	2.34746		38.28	5.872	1.7286		38.28	5.872	1.73934
0.0256	6.176	2.43821		0.0256	6.176	2.12438		0.0256	0.152	2.01188		0.0256	0.952	2.37793		38.28	6.176	1.69106		38.28	6.176	1.76023
0.0256	6.48	2.4195		0.0256	6.48	2.14878		0.0256	0.16	2.02095		0.0256	0.96	2.39913		38.28	6.48	1.66343		38.28	6.48	1.78402
0.0256	6.784	2.40846		0.0256	6.784	2.17373		0.0256	0.168	2.03035		0.0256	0.968	2.41275		38.28	6.784	1.64588		38.28	6.784	1.81052
0.0256	7.088	2.40457		0.0256	7.088	2.19898		0.0256	0.176	2.04009		0.0256	0.976	2.41882		38.28	7.088	1.63847		38.28	7.088	1.8395
0.0256	7.392	2.40753		0.0256	7.392	2.22349		0.0256	0.184	2.05019		0.0256	0.984	2.41886		38.28	7.392	1.64117		38.28	7.392	1.87073
0.0256	7.696	2.4174		0.0256	7.696	2.2471		0.0256	0.192	2.06064		0.0256	0.992	2.41405		38.28	7.696	1.65388		38.28	7.696	1.90395
0.0256	8	2.43391		0.0256	8	2.27005		0.0256	0.2	2.07145		0.0256	1	2.40529		38.28	8	1.67637		38.28	8	1.93892
0.032	0.4	2.77179		0.032	0.4	1.75636		0.032	0	1.75635		0.032	0.8	1.75652		38.6	0.4	2.75892		38.6	0.4	1.55575
0.032	0.704	2.76018		0.032	0.704	1.75639		0.032	0.008	1.76025		0.032	0.808	1.75791		38.6	0.704	2.73188		38.6	0.704	1.55469
0.032	1.008	2.74272		0.032	1.008	1.75669		0.032	0.016	1.7643		0.032	0.816	1.76083		38.6	1.008	2.69129		38.6	1.008	1.55336
0.032	1.312	2.71972		0.032	1.312	1.75756		0.032	0.024	1.76853		0.032	0.824	1.76523		38.6	1.312	2.63809		38.6	1.312	1.55209
0.032	1.616	2.69172		0.032	1.616	1.75924		0.032	0.032	1.77293		0.032	0.832	1.77118		38.6	1.616	2.57408		38.6	1.616	1.55122
0.032	1.92	2.65943		0.032	1.92	1.76196		0.032	0.04	1.77752		0.032	0.84	1.77866		38.6	1.92	2.50111		38.6	1.92	1.55102
0.032	2.224	2.62363		0.032	2.224	1.76588		0.032	0.048	1.78229		0.032	0.848	1.78801		38.6	2.224	2.42131		38.6	2.224	1.55172
0.032	2.528	2.58516		0.032	2.528	1.77115		0.032	0.056	1.78727		0.032	0.856	1.79893		38.6	2.528	2.33707		38.6	2.528	1.55345
0.032	2.832	2.54491		0.032	2.832	1.77793		0.032	0.064	1.79244		0.032	0.864	1.80885		38.6	2.832	2.25055		38.6	2.832	1.55627
0.032	3.136	2.50337		0.032	3.136	1.78645		0.032	0.072	1.79782		0.032	0.872	1.82049		38.6	3.136	2.16411		38.6	3.136	1.56018
0.032	3.44	2.46033		0.032	3.44	1.79716		0.032	0.08	1.80342		0.032	0.88	1.83411		38.6	3.44	2.07936		38.6	3.44	1.56515
0.032	3.744	2.41797		0.032	3.744	1.8067		0.032	0.088	1.80925		0.032	0.888	1.85004		38.6	3.744	1.99693		38.6	3.744	1.57111
0.032	4.048	2.37744		0.032	4.048	1.81733		0.032	0.096	1.8153		0.032	0.896	1.86858		38.6	4.048	1.91894		38.6	4.048	1.578
0.032	4.352	2.3393		0.032	4.352	1.82943		0.032	0.104	1.8216		0.032	0.904	1.89		38.6	4.352	1.84619		38.6	4.352	1.58572
0.032	4.656	2.30395		0.032	4.656	1.84304		0.032	0.112	1.82814		0.032	0.912	1.91441		38.6	4.656	1.77988		38.6	4.656	1.5942
0.032	4.96	2.27171		0.032	4.96	1.85815		0.032	0.12	1.83494		0.032	0.92	1.94187		38.6	4.96	1.72087		38.6	4.96	1.60475
0.032	5.264	2.2428		0.032	5.264	1.8747		0.032	0.128	1.842		0.032	0.928	1.97213		38.6	5.264	1.66986		38.6	5.264	1.61913
0.032	5.568	2.21709		0.032	5.568	1.89259		0.032	0.136	1.84933		0.032	0.936	2.00459		38.6	5.568	1.62743		38.6	5.568	1.63744
0.032	5.872	2.19477		0.032	5.872	1.91168		0.032	0.144	1.85693		0.032	0.944	2.03812		38.6	5.872	1.59404		38.6	5.872	1.65912
0.032	6.176	2.17732		0.032	6.176	1.9318		0.032	0.152	1.86482		0.032	0.952	2.06944		38.6	6.176	1.57003		38.6	6.176	1.6817
0.032	6.48	1.77648		0.032	6.48	1.95275		0.032	0.16	1.873		0.032	0.96	2.09815		38.6	6.48	1.55564		38.6	6.48	1.70711
0.032	6.784	1.76244		0.032	6.784	1.97426		0.032	0.168	1.88149		0.032	0.968	2.12252		38.6	6.784	1.551		38.6	6.784	1.73515
0.032	7.088	1.75672		0.032	7.088	1.99597		0.032	0.176	1.89027		0.032	0.976	2.14147		38.6	7.088	1.55616		38.6	7.088	1.76559
0.032	7.392	1.75808		0.032	7.392	2.01685		0.032	0.184	1.89937		0.032	0.984	2.15468		38.6	7.392	1.5711		38.6	7.392	1.79821
0.032	7.696	1.7667		0.032	7.696	2.03711		0.032	0.192	1.9088		0.032	0.992	2.16242		38.6	7.696	1.59566		38.6	7.696	1.83277
0.032	8	1.78238		0.032	8	2.05675		0.032	0.2	1.91854		0.032	1	2.16526		38.6	8	1.62958		38.6	8	1.86902
0.0384	0.4	2.43241		0.0384	0.4	1.62786		0.0384	0	1.62569		0.0384	0.8	1.6341		38.92	0.4	2.42592		38.92	0.4	1.47349
0.0384	0.704	2.42145		0.0384	0.704	1.62715		0.0384	0.008	1.62904		0.0384	0.808	1.62915		38.92	0.704	2.40319		38.92	0.704	1.47241
0.0384	1.008	2.40507		0.0384	1.008	1.62634		0.0384	0.016	1.6326		0.0384	0.816	1.62669		38.92	1.008	2.36892		38.92	1.008	1.47104
0.0384	1.312	2.38357		0.0384	1.312	1.62575		0.0384	0.024	1.63629		0.0384	0.824	1.62566		38.92	1.312	2.32414		38.92	1.312	1.46974
0.0384	1.616	2.35758		0.0384	1.616	1.62568		0.0384	0.032	1.64007		0.0384	0.832	1.62613		38.92	1.616	2.27039		38.92	1.616	1.46884
0.0384	1.92	2.32777		0.0384	1.92	1.6264		0.0384	0.04	1.64402		0.0384	0.84	1.62802		38.92	1.92	2.20951		38.92	1.92	1.46864
0.0384	2.224	2.29385		0.0384	2.224	1.62811		0.0384	0.048	1.64814		0.0384	0.848	1.63137		38.92	2.224	2.14316		38.92	2.224	1.46935
0.0384	2.528	2.25754		0.0384	2.528	1.63098		0.0384	0.056	1.65245		0.0384	0.856	1.63615		38.92	2.528	2.07342		38.92	2.528	1.47112
0.0384	2.832	2.03741		0.0384	2.832	1.63519		0.0384	0.064	1.65694		0.0384	0.864	1.64264		38.92	2.832	2.00182		38.92	2.832	1.47399
0.0384	3.136	1.988		0.0384	3.136	1.641		0.0384	0.072	1.66163		0.0384	0.872	1.65119		38.92	3.136	1.92989		38.92	3.136	1.47797
0.0384	3.44	1.94013		0.0384	3.44	1.64876		0.0384	0.08	1.66652		0.0384	0.88	1.65829		38.92	3.44	1.85926		38.92	3.44	1.48301
0.0384	3.744	1.89391		0.0384	3.744	1.65625		0.0384	0.088	1.67161		0.0384	0.888	1.66695		38.92	3.744	1.79129		38.92	3.744	1.48904
0.0384	4.048	1.84991		0.0384	4.048	1.6641		0.0384	0.096	1.67692		0.0384	0.896	1.67738		38.92	4.048	1.72727		38.92	4.048	1.49597
0.0384	4.352	1.80872		0.0384	4.352	1.67336		0.0384	0.104	1.68245		0.0384	0.904	1.6898		38.92	4.352	1.66839		38.92	4.352	1.5037
0.0384	4.656	1.77049		0.0384	4.656	1.68407		0.0384	0.112	1.68821		0.0384	0.912	1.7044		38.92	4.656	1.61569		38.92	4.656	1.51259
0.0384	4.96	1.73591		0.0384	4.96	1.69623		0.0384	0.12	1.6942		0.0384	0.92	1.72131		38.92	4.96	1.57006		38.92	4.96	1.52492
0.0384	5.264	1.70517		0.0384	5.264	1.70977		0.0384	0.128	1.70042		0.0384	0.928	1.74054		38.92	5.264	1.53228		38.92	5.264	1.54101
0.0384	5.568	1.6783		0.0384	5.568	1.72461		0.0384	0.136	1.7069		0.0384	0.936	1.76198		38.92	5.568	1.5029		38.92	5.568	1.56089
0.0384	5.872	1.6552		0.0384	5.872	1.7406		0.0384	0.144	1.71363		0.0384	0.944	1.78532		38.92	5.872	1.48237		38.92	5.872	1.58467
0.0384	6.176	1.63732		0.0384	6.176	1.75757		0.0384	0.152	1.72062		0.0384	0.952	1.80999		38.92	6.176	1.471		38.92	6.176	1.60885
0.0384	6.48	1.6276		0.0384	6.48	1.77532		0.0384	0.16	1.72787		0.0384	0.96	1.83518		38.92	6.48	1.46901		38.92	6.48	1.63577
0.0384	6.784	1.626		0.0384	6.784	1.79351		0.0384	0.168	1.73539		0.0384	0.968	1.85957		38.92	6.784	1.47651		38.92	6.784	1.66524
0.0384	7.088	1.63181		0.0384	7.088	1.81207		0.0384	0.176	1.7432		0.0384	0.976	1.88112		38.92	7.088	1.49354		38.92	7.088	1.69706
0.0384	7.392	1.6449		0.0384	7.392	1.83026		0.0384	0.184	1.75131		0.0384	0.984	1.89987		38.92	7.392	1.52002		38.92	7.392	1.73099
0.0384	7.696	1.66517		0.0384	7.696	1.84733		0.0384	0.192	1.75971		0.0384	0.992	1.91518		38.92	7.696	1.55578		38.92	7.696	1.76681
0.0384	8	1.69235		0.0384	8	1.8638		0.0384	0.2	1.76843		0.0384	1	1.92669		38.92	8	1.60046		38.92	8	1.80428
0.0448	0.4	2.0523		0.0448	0.4	1.50914		0.0448	0	1.50245		0.0448	0.8	1.53874		39.24	0.4	2.13079		39.24	0.4	1.39653
0.0448	0.704	2.03883		0.0448	0.704	1.50785		0.0448	0.008	1.50504		0.0448	0.808	1.52572		39.24	0.704	2.11182		39.24	0.704	1.39542
0.0448	1.008	2.01983		0.0448	1.008	1.50617		0.0448	0.016	1.50795		0.0448	0.816	1.51622		39.24	1.008	2.0833		39.24	1.008	1.39404
0.0448	1.312	1.99523		0.0448	1.312	1.50446		0.0448	0.024	1.51104		0.0448	0.824	1.51035		39.24	1.312	2.04619		39.24	1.312	1.39273
0.0448	1.616	1.96562		0.0448	1.616	1.50306		0.0448	0.032	1.51431		0.0448	0.832	1.50624		39.24	1.616	2.0018		39.24	1.616	1.39183
0.0448	1.92	1.93181		0.0448	1.92	1.50226		0.0448	0.04	1.51776		0.0448	0.84	1.50356		39.24	1.92	1.95161		39.24	1.92	1.39165
0.0448	2.224	1.89478		0.0448	2.224	1.50231		0.0448	0.048	1.52135		0.0448	0.848	1.5023		39.24	2.224	1.89696		39.24	2.224	1.39241
0.0448	2.528	1.8548		0.0448	2.528	1.5034		0.0448	0.056	1.525		0.0448	0.856	1.50241		39.24	2.528	1.83939		39.24	2.528	1.39425
0.0448	2.832	1.81327		0.0448	2.832	1.50571		0.0448	0.064	1.52883		0.0448	0.864	1.50392		39.24	2.832	1.78047		39.24	2.832	1.39721
0.0448	3.136	1.77163		0.0448	3.136	1.50944		0.0448	0.072	1.53284		0.0448	0.872	1.50682		39.24	3.136	1.72171		39.24	3.136	1.40129
0.0448	3.44	1.73095		0.0448	3.44	1.51489		0.0448	0.08	1.53704		0.0448	0.88	1.51127		39.24	3.44	1.66452		39.24	3.44	1.40644
0.0448	3.744	1.69203		0.0448	3.744	1.5218		0.0448	0.088	1.54143		0.0448	0.888	1.51762		39.24	3.744	1.61012		39.24	3.744	1.41258
0.0448	4.048	1.65559		0.0448	4.048	1.52773		0.0448	0.096	1.54602		0.0448	0.896	1.52402		39.24	4.048	1.55966		39.24	4.048	1.41959
0.0448	4.352	1.6218		0.0448	4.352	1.53498		0.0448	0.104	1.55081		0.0448	0.904	1.53069		39.24	4.352	1.51429		39.24	4.352	1.42737
0.0448	4.656	1.59136		0.0448	4.656	1.5436		0.0448	0.112	1.55582		0.0448	0.912	1.53892		39.24	4.656	1.47496		39.24	4.656	1.4376
0.0448	4.96	1.56457		0.0448	4.96	1.55356		0.0448	0.12	1.56105		0.0448	0.92	1.54883		39.24	4.96	1.44249		39.24	4.96	1.45155
0.0448	5.264	1.54147		0.0448	5.264	1.56479		0.0448	0.128	1.56651		0.0448	0.928	1.56052		39.24	5.264	1.41756		39.24	5.264	1.46915
0.0448	5.568	1.52201		0.0448	5.568	1.57721		0.0448	0.136	1.5722		0.0448	0.936	1.57399		39.24	5.568	1.40073		39.24	5.568	1.49045
0.0448	5.872	1.50814		0.0448	5.872	1.59066		0.0448	0.144	1.57813		0.0448	0.944	1.58916		39.24	5.872	1.39246		39.24	5.872	1.51551
0.0448	6.176	1.50243		0.0448	6.176	1.60498		0.0448	0.152	1.58431		0.0448	0.952	1.60585		39.24	6.176	1.39306		39.24	6.176	1.54167
0.0448	6.48	1.50488		0.0448	6.48	1.6199		0.0448	0.16	1.59076		0.0448	0.96	1.62372		39.24	6.48	1.40274		39.24	6.48	1.56994
0.0448	6.784	1.51506		0.0448	6.784	1.63529		0.0448	0.168	1.59748		0.0448	0.968	1.64231		39.24	6.784	1.42162		39.24	6.784	1.60071
0.0448	7.088	1.53254		0.0448	7.088	1.65089		0.0448	0.176	1.60448		0.0448	0.976	1.66103		39.24	7.088	1.44968		39.24	7.088	1.63376
0.0448	7.392	1.55738		0.0448	7.392	1.66644		0.0448	0.184	1.61179		0.0448	0.984	1.6792		39.24	7.392	1.48678		39.24	7.392	1.66889
0.0448	7.696	1.58935		0.0448	7.696	1.68155		0.0448	0.192	1.61942		0.0448	0.992	1.69618		39.24	7.696	1.53264		39.24	7.696	1.70586
0.0448	8	1.62821		0.0448	8	1.69506		0.0448	0.2	1.62739		0.0448	1	1.71093		39.24	8	1.58683		39.24	8	1.74444
0.0512	0.4	1.8154		0.0512	0.4	1.40209		0.0512	0	1.39069		0.0512	0.8	1.46814		39.56	0.4	1.87359		39.56	0.4	1.32243
0.0512	0.704	1.80385		0.0512	0.704	1.40038		0.0512	0.008	1.39254		0.0512	0.808	1.44848		39.56	0.704	1.85803		39.56	0.704	1.32132
0.0512	1.008	1.7875		0.0512	1.008	1.39809		0.0512	0.016	1.39483		0.0512	0.816	1.43178		39.56	1.008	1.83461		39.56	1.008	1.31993
0.0512	1.312	1.76635		0.0512	1.312	1.39559		0.0512	0.024	1.39732		0.0512	0.824	1.41844		39.56	1.312	1.80415		39.56	1.312	1.31862
0.0512	1.616	1.74099		0.0512	1.616	1.39325		0.0512	0.032	1.39998		0.0512	0.832	1.40891		39.56	1.616	1.76769		39.56	1.616	1.31775
0.0512	1.92	1.71222		0.0512	1.92	1.39142		0.0512	0.04	1.4028		0.0512	0.84	1.40228		39.56	1.92	1.72648		39.56	1.92	1.31762
0.0512	2.224	1.68093		0.0512	2.224	1.39037		0.0512	0.048	1.40579		0.0512	0.848	1.39713		39.56	2.224	1.68172		39.56	2.224	1.31845
0.0512	2.528	1.64806		0.0512	2.528	1.39028		0.0512	0.056	1.40897		0.0512	0.856	1.39344		39.56	2.528	1.63487		39.56	2.528	1.32038
0.0512	2.832	1.61447		0.0512	2.832	1.39134		0.0512	0.064	1.41233		0.0512	0.864	1.39115		39.56	2.832	1.58734		39.56	2.832	1.32347
0.0512	3.136	1.58004		0.0512	3.136	1.39371		0.0512	0.072	1.41576		0.0512	0.872	1.39022		39.56	3.136	1.54047		39.56	3.136	1.3277
0.0512	3.44	1.54659		0.0512	3.44	1.39759		0.0512	0.08	1.41932		0.0512	0.88	1.39065		39.56	3.44	1.49542		39.56	3.44	1.33299
0.0512	3.744	1.5152		0.0512	3.744	1.40323		0.0512	0.088	1.42307		0.0512	0.888	1.39243		39.56	3.744	1.45333		39.56	3.744	1.33926
0.0512	4.048	1.48612		0.0512	4.048	1.40968		0.0512	0.096	1.427		0.0512	0.896	1.39565		39.56	4.048	1.41534		39.56	4.048	1.34639
0.0512	4.352	1.46013		0.0512	4.352	1.41571		0.0512	0.104	1.43114		0.0512	0.904	1.4005		39.56	4.352	1.38245		39.56	4.352	1.35476
0.0512	4.656	1.43753		0.0512	4.656	1.423		0.0512	0.112	1.43547		0.0512	0.912	1.40736		39.56	4.656	1.35553		39.56	4.656	1.36656
0.0512	4.96	1.41839		0.0512	4.96	1.43149		0.0512	0.12	1.44001		0.0512	0.92	1.41289		39.56	4.96	1.33534		39.56	4.96	1.38203
0.0512	5.264	1.40269		0.0512	5.264	1.44112		0.0512	0.128	1.44477		0.0512	0.928	1.41976		39.56	5.264	1.32252		39.56	5.264	1.40112
0.0512	5.568	1.39259		0.0512	5.568	1.45177		0.0512	0.136	1.44975		0.0512	0.936	1.428		39.56	5.568	1.3176		39.56	5.568	1.42374
0.0512	5.872	1.39061		0.0512	5.872	1.46331		0.0512	0.144	1.45497		0.0512	0.944	1.43763		39.56	5.872	1.32099		39.56	5.872	1.45003
0.0512	6.176	1.39682		0.0512	6.176	1.47554		0.0512	0.152	1.46043		0.0512	0.952	1.44858		39.56	6.176	1.33298		39.56	6.176	1.47802
0.0512	6.48	1.41107		0.0512	6.48	1.48825		0.0512	0.16	1.46614		0.0512	0.96	1.46069		39.56	6.48	1.35377		39.56	6.48	1.50759
0.0512	6.784	1.43264		0.0512	6.784	1.50125		0.0512	0.168	1.47211		0.0512	0.968	1.47376		39.56	6.784	1.38341		39.56	6.784	1.53961
0.0512	7.088	1.46177		0.0512	7.088	1.51431		0.0512	0.176	1.47835		0.0512	0.976	1.4875		39.56	7.088	1.42186		39.56	7.088	1.57386
0.0512	7.392	1.49825		0.0512	7.392	1.52716		0.0512	0.184	1.48489		0.0512	0.984	1.50154		39.56	7.392	1.46892		39.56	7.392	1.61015
0.0512	7.696	1.54188		0.0512	7.696	1.53959		0.0512	0.192	1.49173		0.0512	0.992	1.51549		39.56	7.696	1.52423		39.56	7.696	1.64824
0.0512	8	1.59248		0.0512	8	1.55639		0.0512	0.2	1.49889		0.0512	1	1.52889		39.56	8	1.58728		39.56	8	1.68792
0.0576	0.4	1.61296		0.0576	0.4	1.30805		0.0576	0	1.29312		0.0576	0.8	1.41956		39.88	0.4	1.65409		39.88	0.4	1.25229
0.0576	0.704	1.60366		0.0576	0.704	1.30608		0.0576	0.008	1.29451		0.0576	0.808	1.39461		39.88	0.704	1.64123		39.88	0.704	1.25118
0.0576	1.008	1.58994		0.0576	1.008	1.30341		0.0576	0.016	1.29627		0.0576	0.816	1.37212		39.88	1.008	1.62191		39.88	1.008	1.24979
0.0576	1.312	1.57215		0.0576	1.312	1.30043		0.0576	0.024	1.2982		0.0576	0.824	1.35239		39.88	1.312	1.59686		39.88	1.312	1.2485
0.0576	1.616	1.5509		0.0576	1.616	1.29755		0.0576	0.032	1.30029		0.0576	0.832	1.3358		39.88	1.616	1.56703		39.88	1.616	1.24766
0.0576	1.92	1.52693		0.0576	1.92	1.29513		0.0576	0.04	1.30253		0.0576	0.84	1.32277		39.88	1.92	1.53351		39.88	1.92	1.24759
0.0576	2.224	1.50033		0.0576	2.224	1.29347		0.0576	0.048	1.30494		0.0576	0.848	1.31359		39.88	2.224	1.49751		39.88	2.224	1.24851
0.0576	2.528	1.47225		0.0576	2.528	1.29277		0.0576	0.056	1.30752		0.0576	0.856	1.30652		39.88	2.528	1.46026		39.88	2.528	1.25056
0.0576	2.832	1.44406		0.0576	2.832	1.29318		0.0576	0.064	1.31027		0.0576	0.864	1.30096		39.88	2.832	1.42296		39.88	2.832	1.25379
0.0576	3.136	1.41669		0.0576	3.136	1.29485		0.0576	0.072	1.31321		0.0576	0.872	1.29688		39.88	3.136	1.38673		39.88	3.136	1.25818
0.0576	3.44	1.39086		0.0576	3.44	1.29788		0.0576	0.08	1.31633		0.0576	0.88	1.29421		39.88	3.44	1.35267		39.88	3.44	1.26364
0.0576	3.744	1.36682		0.0576	3.744	1.30242		0.0576	0.088	1.31959		0.0576	0.888	1.29291		39.88	3.744	1.32175		39.88	3.744	1.27008
0.0576	4.048	1.3455		0.0576	4.048	1.30863		0.0576	0.096	1.32292		0.0576	0.896	1.29294		39.88	4.048	1.2951		39.88	4.048	1.27737
0.0576	4.352	1.32718		0.0576	4.352	1.31594		0.0576	0.104	1.32644		0.0576	0.904	1.29431		39.88	4.352	1.27364		39.88	4.352	1.28696
0.0576	4.656	1.312		0.0576	4.656	1.32255		0.0576	0.112	1.33016		0.0576	0.912	1.29698		39.88	4.656	1.25816		39.88	4.656	1.30023
0.0576	4.96	1.3		0.0576	4.96	1.33023		0.0576	0.12	1.33407		0.0576	0.92	1.30107		39.88	4.96	1.24937		39.88	4.96	1.31713
0.0576	5.264	1.29329		0.0576	5.264	1.33889		0.0576	0.128	1.33819		0.0576	0.928	1.30674		39.88	5.264	1.24784		39.88	5.264	1.33759
0.0576	5.568	1.29465		0.0576	5.568	1.34839		0.0576	0.136	1.34252		0.0576	0.936	1.31406		39.88	5.568	1.25407		39.88	5.568	1.36149
0.0576	5.872	1.30421		0.0576	5.872	1.35859		0.0576	0.144	1.34707		0.0576	0.944	1.32021		39.88	5.872	1.26841		39.88	5.872	1.38897
0.0576	6.176	1.322		0.0576	6.176	1.36932		0.0576	0.152	1.35185		0.0576	0.952	1.32743		39.88	6.176	1.29114		39.88	6.176	1.41868
0.0576	6.48	1.34733		0.0576	6.48	1.38035		0.0576	0.16	1.35686		0.0576	0.96	1.33568		39.88	6.48	1.32238		39.88	6.48	1.44949
0.0576	6.784	1.38032		0.0576	6.784	1.39148		0.0576	0.168	1.3621		0.0576	0.968	1.34483		39.88	6.784	1.36216		39.88	6.784	1.4827
0.0576	7.088	1.42092		0.0576	7.088	1.40532		0.0576	0.176	1.3676		0.0576	0.976	1.35473		39.88	7.088	1.41037		39.88	7.088	1.51812
0.0576	7.392	1.46896		0.0576	7.392	1.42699		0.0576	0.184	1.37336		0.0576	0.984	1.36518		39.88	7.392	1.46672		39.88	7.392	1.55553
0.0576	7.696	1.52428		0.0576	7.696	1.45584		0.0576	0.192	1.37938		0.0576	0.992	1.37592		39.88	7.696	1.53079		39.88	7.696	1.59472
0.0576	8	1.58678		0.0576	8	1.49117		0.0576	0.2	1.38569		0.0576	1	1.3867		39.88	8	1.60197		39.88	8	1.63547
0.064	0.4	1.44568		0.064	0.4	1.22806		0.064	0	1.21164		0.064	0.8	1.39081		40.2	0.4	1.47168		40.2	0.4	1.18808
0.064	0.704	1.43757		0.064	0.704	1.22596		0.064	0.008	1.21266		0.064	0.808	1.36164		40.2	0.704	1.46113		40.2	0.704	1.18695
0.064	1.008	1.42562		0.064	1.008	1.22311		0.064	0.016	1.21393		0.064	0.816	1.33455		40.2	1.008	1.44533		40.2	1.008	1.18556
0.064	1.312	1.41028		0.064	1.312	1.21993		0.064	0.024	1.21534		0.064	0.824	1.30973		40.2	1.312	1.42494		40.2	1.312	1.18428
0.064	1.616	1.39216		0.064	1.616	1.21684		0.064	0.032	1.2169		0.064	0.832	1.2875		40.2	1.616	1.40084		40.2	1.616	1.18347
0.064	1.92	1.37196		0.064	1.92	1.21422		0.064	0.04	1.21861		0.064	0.84	1.26822		40.2	1.92	1.37402		40.2	1.92	1.18345
0.064	2.224	1.35047		0.064	2.224	1.21237		0.064	0.048	1.22048		0.064	0.848	1.25226		40.2	2.224	1.34553		40.2	2.224	1.18446
0.064	2.528	1.32847		0.064	2.528	1.21153		0.064	0.056	1.22251		0.064	0.856	1.24008		40.2	2.528	1.31643		40.2	2.528	1.18663
0.064	2.832	1.30681		0.064	2.832	1.21182		0.064	0.064	1.22471		0.064	0.864	1.23141		40.2	2.832	1.28781		40.2	2.832	1.19
0.064	3.136	1.28595		0.064	3.136	1.21333		0.064	0.072	1.22708		0.064	0.872	1.22445		40.2	3.136	1.26078		40.2	3.136	1.19455
0.064	3.44	1.26669		0.064	3.44	1.21615		0.064	0.08	1.22963		0.064	0.88	1.21905		40.2	3.44	1.23638		40.2	3.44	1.20019
0.064	3.744	1.24969		0.064	3.744	1.2203		0.064	0.088	1.23238		0.064	0.888	1.21515		40.2	3.744	1.2156		40.2	3.744	1.20681
0.064	4.048	1.23533		0.064	4.048	1.22585		0.064	0.096	1.23532		0.064	0.896	1.21268		40.2	4.048	1.19936		40.2	4.048	1.21454
0.064	4.352	1.22382		0.064	4.352	1.23284		0.064	0.104	1.23843		0.064	0.904	1.21157		40.2	4.352	1.18849		40.2	4.352	1.22548
0.064	4.656	1.21524		0.064	4.656	1.24133		0.064	0.112	1.2416		0.064	0.912	1.21176		40.2	4.656	1.18357		40.2	4.656	1.24008
0.064	4.96	1.21151		0.064	4.96	1.24934		0.064	0.12	1.24496		0.064	0.92	1.21323		40.2	4.96	1.18527		40.2	4.96	1.25825
0.064	5.264	1.21576		0.064	5.264	1.25754		0.064	0.128	1.24852		0.064	0.928	1.21591		40.2	5.264	1.19419		40.2	5.264	1.27995
0.064	5.568	1.22819		0.064	5.568	1.26642		0.064	0.136	1.25228		0.064	0.936	1.21981		40.2	5.568	1.21078		40.2	5.568	1.30511
0.064	5.872	1.24893		0.064	5.872	1.2758		0.064	0.144	1.25626		0.064	0.944	1.22494		40.2	5.872	1.23533		40.2	5.872	1.33361
0.064	6.176	1.27767		0.064	6.176	1.28564		0.064	0.152	1.26045		0.064	0.952	1.23136		40.2	6.176	1.26807		40.2	6.176	1.36487
0.064	6.48	1.31409		0.064	6.48	1.3014		0.064	0.16	1.26487		0.064	0.96	1.23914		40.2	6.48	1.30908		40.2	6.48	1.39683
0.064	6.784	1.35838		0.064	6.784	1.32553		0.064	0.168	1.26951		0.064	0.968	1.24665		40.2	6.784	1.3583		40.2	6.784	1.43117
0.064	7.088	1.41042		0.064	7.088	1.35722		0.064	0.176	1.27439		0.064	0.976	1.25401		40.2	7.088	1.41554		40.2	7.088	1.46767
0.064	7.392	1.47009		0.064	7.392	1.39572		0.064	0.184	1.27951		0.064	0.984	1.26195		40.2	7.392	1.48044		40.2	7.392	1.50615
0.064	7.696	1.53732		0.064	7.696	1.44029		0.064	0.192	1.28488		0.064	0.992	1.2703		40.2	7.696	1.55247		40.2	7.696	1.5464
0.064	8	1.61208		0.064	8	1.49028		0.064	0.2	1.29049		0.064	1	1.27891		40.2	8	1.63094		40.2	8	1.5882
0.0704	0.4	1.3105		0.0704	0.4	1.16281		0.0704	0	1.1469		0.0704	0.8	1.37989		40.52	0.4	1.32638		40.52	0.4	1.13188
0.0704	0.704	1.30399		0.0704	0.704	1.16071		0.0704	0.008	1.14752		0.0704	0.808	1.34746		40.52	0.704	1.31778		40.52	0.704	1.13073
0.0704	1.008	1.29434		0.0704	1.008	1.15786		0.0704	0.016	1.14831		0.0704	0.816	1.31676		40.52	1.008	1.30496		40.52	1.008	1.12931
0.0704	1.312	1.28192		0.0704	1.312	1.15469		0.0704	0.024	1.14923		0.0704	0.824	1.28794		40.52	1.312	1.28851		40.52	1.312	1.128
0.0704	1.616	1.26738		0.0704	1.616	1.15166		0.0704	0.032	1.15029		0.0704	0.832	1.26126		40.52	1.616	1.26923		40.52	1.616	1.12718
0.0704	1.92	1.25134		0.0704	1.92	1.14916		0.0704	0.04	1.1515		0.0704	0.84	1.23703		40.52	1.92	1.248		40.52	1.92	1.12719
0.0704	2.224	1.23454		0.0704	2.224	1.14748		0.0704	0.048	1.15285		0.0704	0.848	1.21556		40.52	2.224	1.22581		40.52	2.224	1.12825
0.0704	2.528	1.21759		0.0704	2.528	1.14686		0.0704	0.056	1.15437		0.0704	0.856	1.19722		40.52	2.528	1.20368		40.52	2.528	1.13051
0.0704	2.832	1.20112		0.0704	2.832	1.14742		0.0704	0.064	1.15606		0.0704	0.864	1.18241		40.52	2.832	1.18264		40.52	2.832	1.13401
0.0704	3.136	1.18605		0.0704	3.136	1.14922		0.0704	0.072	1.15791		0.0704	0.872	1.1716		40.52	3.136	1.1637		40.52	3.136	1.1387
0.0704	3.44	1.17291		0.0704	3.44	1.15229		0.0704	0.08	1.15995		0.0704	0.88	1.16361		40.52	3.44	1.14782		40.52	3.44	1.14451
0.0704	3.744	1.1621		0.0704	3.744	1.15661		0.0704	0.088	1.16218		0.0704	0.888	1.15724		40.52	3.744	1.13591		40.52	3.744	1.15131
0.0704	4.048	1.1539		0.0704	4.048	1.16215		0.0704	0.096	1.1646		0.0704	0.896	1.15247		40.52	4.048	1.12879		40.52	4.048	1.15981
0.0704	4.352	1.14842		0.0704	4.352	1.16888		0.0704	0.104	1.16722		0.0704	0.904	1.1492		40.52	4.352	1.12723		40.52	4.352	1.17195
0.0704	4.656	1.14734		0.0704	4.656	1.17672		0.0704	0.112	1.17005		0.0704	0.912	1.14737		40.52	4.656	1.13189		40.52	4.656	1.18773
0.0704	4.96	1.15407		0.0704	4.96	1.18563		0.0704	0.12	1.17306		0.0704	0.92	1.14687		40.52	4.96	1.14334		40.52	4.96	1.20709
0.0704	5.264	1.16898		0.0704	5.264	1.19556		0.0704	0.128	1.17614		0.0704	0.928	1.14763		40.52	5.264	1.16204		40.52	5.264	1.22994
0.0704	5.568	1.19226		0.0704	5.568	1.2051		0.0704	0.136	1.17942		0.0704	0.936	1.14957		40.52	5.568	1.18831		40.52	5.568	1.25617
0.0704	5.872	1.22396		0.0704	5.872	1.22091		0.0704	0.144	1.18292		0.0704	0.944	1.15263		40.52	5.872	1.2223		40.52	5.872	1.28561
0.0704	6.176	1.26338		0.0704	6.176	1.24552		0.0704	0.152	1.18663		0.0704	0.952	1.15671		40.52	6.176	1.26429		40.52	6.176	1.31823
0.0704	6.48	1.31095		0.0704	6.48	1.27815		0.0704	0.16	1.19056		0.0704	0.96	1.16176		40.52	6.48	1.31429		40.52	6.48	1.35121
0.0704	6.784	1.36659		0.0704	6.784	1.31804		0.0704	0.168	1.19473		0.0704	0.968	1.16773		40.52	6.784	1.37216		40.52	6.784	1.38654
0.0704	7.088	1.43023		0.0704	7.088	1.36445		0.0704	0.176	1.19912		0.0704	0.976	1.17455		40.52	7.088	1.43763		40.52	7.088	1.42403
0.0704	7.392	1.50185		0.0704	7.392	1.41669		0.0704	0.184	1.20375		0.0704	0.984	1.18216		40.52	7.392	1.51022		40.52	7.392	1.46349
0.0704	7.696	1.58144		0.0704	7.696	1.47411		0.0704	0.192	1.20863		0.0704	0.992	1.19049		40.52	7.696	1.58932		40.52	7.696	1.50472
0.0704	8	1.66924		0.0704	8	1.53614		0.0704	0.2	1.21375		0.0704	1	1.19877		40.52	8	1.67416		40.52	8	1.54751
0.0768	0.4	1.20755		0.0768	0.4	1.11277		0.0768	0	1.09872		0.0768	0.8	1.38519		40.84	0.4	1.21622		40.84	0.4	1.08828
0.0768	0.704	1.2023		0.0768	0.704	1.11075		0.0768	0.008	1.0989		0.0768	0.808	1.35028		40.84	0.704	1.20957		40.84	0.704	1.08706
0.0768	1.008	1.19453		0.0768	1.008	1.10804		0.0768	0.016	1.09921		0.0768	0.816	1.3168		40.84	1.008	1.19961		40.84	1.008	1.08555
0.0768	1.312	1.18465		0.0768	1.312	1.10508		0.0768	0.024	1.09965		0.0768	0.824	1.28489		40.84	1.312	1.18679		40.84	1.312	1.08414
0.0768	1.616	1.17322		0.0768	1.616	1.10232		0.0768	0.032	1.10023		0.0768	0.832	1.25477		40.84	1.616	1.17169		40.84	1.616	1.08323
0.0768	1.92	1.16072		0.0768	1.92	1.10017		0.0768	0.04	1.10096		0.0768	0.84	1.22668		40.84	1.92	1.15516		40.84	1.92	1.08316
0.0768	2.224	1.14785		0.0768	2.224	1.09893		0.0768	0.048	1.10183		0.0768	0.848	1.20089		40.84	2.224	1.13834		40.84	2.224	1.08417
0.0768	2.528	1.13544		0.0768	2.528	1.09881		0.0768	0.056	1.10287		0.0768	0.856	1.17771		40.84	2.528	1.12219		40.84	2.528	1.08641
0.0768	2.832	1.12413		0.0768	2.832	1.09992		0.0768	0.064	1.10407		0.0768	0.864	1.15747		40.84	2.832	1.1077		40.84	2.832	1.08992
0.0768	3.136	1.11446		0.0768	3.136	1.10231		0.0768	0.072	1.10544		0.0768	0.872	1.14055		40.84	3.136	1.09581		40.84	3.136	1.09467
0.0768	3.44	1.10687		0.0768	3.44	1.10596		0.0768	0.08	1.10699		0.0768	0.88	1.12736		40.84	3.44	1.0874		40.84	3.44	1.10056
0.0768	3.744	1.10166		0.0768	3.744	1.1108		0.0768	0.088	1.10873		0.0768	0.888	1.11815		40.84	3.744	1.08333		40.84	3.744	1.10745
0.0768	4.048	1.099		0.0768	4.048	1.11675		0.0768	0.096	1.11067		0.0768	0.896	1.11112		40.84	4.048	1.08435		40.84	4.048	1.11654
0.0768	4.352	1.10033		0.0768	4.352	1.12371		0.0768	0.104	1.11281		0.0768	0.904	1.10575		40.84	4.352	1.09115		40.84	4.352	1.12935
0.0768	4.656	1.10928		0.0768	4.656	1.13156		0.0768	0.112	1.11516		0.0768	0.912	1.10195		40.84	4.656	1.10432		40.84	4.656	1.14581
0.0768	4.96	1.12636		0.0768	4.96	1.14022		0.0768	0.12	1.11773		0.0768	0.92	1.09965		40.84	4.96	1.12438		40.84	4.96	1.16585
0.0768	5.264	1.15183		0.0768	5.264	1.1549		0.0768	0.128	1.12053		0.0768	0.928	1.09874		40.84	5.264	1.15173		40.84	5.264	1.18938
0.0768	5.568	1.18587		0.0768	5.568	1.17859		0.0768	0.136	1.1235		0.0768	0.936	1.09911		40.84	5.568	1.18668		40.84	5.568	1.21636
0.0768	5.872	1.22814		0.0768	5.872	1.21071		0.0768	0.144	1.12657		0.0768	0.944	1.10066		40.84	5.872	1.2294		40.84	5.872	1.24673
0.0768	6.176	1.27861		0.0768	6.176	1.25055		0.0768	0.152	1.12986		0.0768	0.952	1.10326		40.84	6.176	1.27997		40.84	6.176	1.28034
0.0768	6.48	1.33747		0.0768	6.48	1.29736		0.0768	0.16	1.13339		0.0768	0.96	1.10681		40.84	6.48	1.3383		40.84	6.48	1.3142
0.0768	6.784	1.40472		0.0768	6.784	1.35045		0.0768	0.168	1.13714		0.0768	0.968	1.11122		40.84	6.784	1.40396		40.84	6.784	1.35044
0.0768	7.088	1.48037		0.0768	7.088	1.40914		0.0768	0.176	1.14114		0.0768	0.976	1.1164		40.84	7.088	1.47673		40.84	7.088	1.38885
0.0768	7.392	1.56446		0.0768	7.392	1.47282		0.0768	0.184	1.14539		0.0768	0.984	1.12223		40.84	7.392	1.55606		40.84	7.392	1.42925
0.0768	7.696	1.65732		0.0768	7.696	1.54095		0.0768	0.192	1.14988		0.0768	0.992	1.12862		40.84	7.696	1.64125		40.84	7.696	1.47143
0.0768	8	1.76053		0.0768	8	1.61303		0.0768	0.2	1.15463		0.0768	1	1.13546		40.84	8	1.7315		40.84	8	1.51521
0.0832	0.4	1.13232		0.0832	0.4	1.07815		0.0832	0	1.06666		0.0832	0.8	1.40538		41.16	0.4	1.13456		41.16	0.4	1.06153
0.0832	0.704	1.12822		0.0832	0.704	1.07627		0.0832	0.008	1.06638		0.0832	0.808	1.36864		41.16	0.704	1.12983		41.16	0.704	1.06019
0.0832	1.008	1.1221		0.0832	1.008	1.07377		0.0832	0.016	1.06622		0.0832	0.816	1.33309		41.16	1.008	1.12283		41.16	1.008	1.0585
0.0832	1.312	1.11446		0.0832	1.312	1.07109		0.0832	0.024	1.0662		0.0832	0.824	1.29885		41.16	1.312	1.11396		41.16	1.312	1.05688
0.0832	1.616	1.10583		0.0832	1.616	1.06868		0.0832	0.032	1.06631		0.0832	0.832	1.2661		41.16	1.616	1.10374		41.16	1.616	1.05575
0.0832	1.92	1.09682		0.0832	1.92	1.06695		0.0832	0.04	1.06656		0.0832	0.84	1.23506		41.16	1.92	1.09281		41.16	1.92	1.05546
0.0832	2.224	1.08806		0.0832	2.224	1.0662		0.0832	0.048	1.06697		0.0832	0.848	1.20595		41.16	2.224	1.08188		41.16	2.224	1.05628
0.0832	2.528	1.08015		0.0832	2.528	1.06664		0.0832	0.056	1.06754		0.0832	0.856	1.17902		41.16	2.528	1.07172		41.16	2.528	1.05836
0.0832	2.832	1.07364		0.0832	2.832	1.06837		0.0832	0.064	1.06827		0.0832	0.864	1.15456		41.16	2.832	1.06318		41.16	2.832	1.06174
0.0832	3.136	1.06899		0.0832	3.136	1.0714		0.0832	0.072	1.06917		0.0832	0.872	1.13287		41.16	3.136	1.05736		41.16	3.136	1.0664
0.0832	3.44	1.06653		0.0832	3.44	1.07569		0.0832	0.08	1.07026		0.0832	0.88	1.11429		41.16	3.44	1.05545		41.16	3.44	1.07224
0.0832	3.744	1.06646		0.0832	3.744	1.08117		0.0832	0.088	1.07154		0.0832	0.888	1.0992		41.16	3.744	1.05824		41.16	3.744	1.07912
0.0832	4.048	1.07005		0.0832	4.048	1.0877		0.0832	0.096	1.07301		0.0832	0.896	1.088		41.16	4.048	1.06643		41.16	4.048	1.08834
0.0832	4.352	1.08101		0.0832	4.352	1.09515		0.0832	0.104	1.07469		0.0832	0.904	1.08043		41.16	4.352	1.08064		41.16	4.352	1.10133
0.0832	4.656	1.10002		0.0832	4.656	1.10683		0.0832	0.112	1.07658		0.0832	0.912	1.07467		41.16	4.656	1.10142		41.16	4.656	1.11803
0.0832	4.96	1.12742		0.0832	4.96	1.12782		0.0832	0.12	1.0787		0.0832	0.92	1.0705		41.16	4.96	1.1292		41.16	4.96	1.13834
0.0832	5.264	1.16346		0.0832	5.264	1.15767		0.0832	0.128	1.08105		0.0832	0.928	1.06777		41.16	5.264	1.16431		41.16	5.264	1.16216
0.0832	5.568	1.20824		0.0832	5.568	1.19578		0.0832	0.136	1.08364		0.0832	0.936	1.06639		41.16	5.568	1.207		41.16	5.568	1.18946
0.0832	5.872	1.26125		0.0832	5.872	1.24146		0.0832	0.144	1.08648		0.0832	0.944	1.06631		41.16	5.872	1.25734		41.16	5.872	1.22017
0.0832	6.176	1.32297		0.0832	6.176	1.29402		0.0832	0.152	1.08947		0.0832	0.952	1.06741		41.16	6.176	1.31533		41.16	6.176	1.25417
0.0832	6.48	1.39345		0.0832	6.48	1.35279		0.0832	0.16	1.09262		0.0832	0.96	1.06961		41.16	6.48	1.38078		41.16	6.48	1.28877
0.0832	6.784	1.47275		0.0832	6.784	1.4171		0.0832	0.168	1.09601		0.0832	0.968	1.07279		41.16	6.784	1.45335		41.16	6.784	1.32552
0.0832	7.088	1.56099		0.0832	7.088	1.48637		0.0832	0.176	1.09966		0.0832	0.976	1.07683		41.16	7.088	1.53257		41.16	7.088	1.36449
0.0832	7.392	1.65856		0.0832	7.392	1.56003		0.0832	0.184	1.10356		0.0832	0.984	1.0816		41.16	7.392	1.61778		41.16	7.392	1.40548
0.0832	7.696	1.76715		0.0832	7.696	1.63761		0.0832	0.192	1.10773		0.0832	0.992	1.087		41.16	7.696	1.7081		41.16	7.696	1.44832
0.0832	8	1.88687		0.0832	8	1.71868		0.0832	0.2	1.11217		0.0832	1	1.09288		41.16	8	1.80272		41.16	8	1.49282
0.0896	0.4	1.08224		0.0896	0.4	1.05782		0.0896	0	1.05032		0.0896	0.8	1.43941		41.48	0.4	1.08105		41.48	0.4	1.05241
0.0896	0.704	1.07926		0.0896	0.704	1.05607		0.0896	0.008	1.04958		0.0896	0.808	1.40137		41.48	0.704	1.07797		41.48	0.704	1.05092
0.0896	1.008	1.07496		0.0896	1.008	1.05378		0.0896	0.016	1.04897		0.0896	0.816	1.36433		41.48	1.008	1.07349		41.48	1.008	1.04902
0.0896	1.312	1.06974		0.0896	1.312	1.05139		0.0896	0.024	1.04848		0.0896	0.824	1.32839		41.48	1.312	1.06799		41.48	1.312	1.04714
0.0896	1.616	1.0641		0.0896	1.616	1.04937		0.0896	0.032	1.04813		0.0896	0.832	1.29372		41.48	1.616	1.06196		41.48	1.616	1.04574
0.0896	1.92	1.05857		0.0896	1.92	1.04812		0.0896	0.04	1.04793		0.0896	0.84	1.26047		41.48	1.92	1.05598		41.48	1.92	1.04518
0.0896	2.224	1.05373		0.0896	2.224	1.04795		0.0896	0.048	1.04788		0.0896	0.848	1.22886		41.48	2.224	1.05072		41.48	2.224	1.04575
0.0896	2.528	1.0501		0.0896	2.528	1.04905		0.0896	0.056	1.04798		0.0896	0.856	1.19909		41.48	2.528	1.04688		41.48	2.528	1.04762
0.0896	2.832	1.04812		0.0896	2.832	1.05152		0.0896	0.064	1.04825		0.0896	0.864	1.17139		41.48	2.832	1.0452		41.48	2.832	1.05084
0.0896	3.136	1.04816		0.0896	3.136	1.05535		0.0896	0.072	1.0487		0.0896	0.872	1.14602		41.48	3.136	1.04645		41.48	3.136	1.05537
0.0896	3.44	1.05044		0.0896	3.44	1.06047		0.0896	0.08	1.04933		0.0896	0.88	1.12326		41.48	3.44	1.0514		41.48	3.44	1.06113
0.0896	3.744	1.05616		0.0896	3.744	1.06678		0.0896	0.088	1.05016		0.0896	0.888	1.10343		41.48	3.744	1.06079		41.48	3.744	1.06798
0.0896	4.048	1.069		0.0896	4.048	1.07538		0.0896	0.096	1.05118		0.0896	0.896	1.08685		41.48	4.048	1.07535		41.48	4.048	1.07746
0.0896	4.352	1.08975		0.0896	4.352	1.09246		0.0896	0.104	1.05242		0.0896	0.904	1.0739		41.48	4.352	1.09606		41.48	4.352	1.09062
0.0896	4.656	1.11884		0.0896	4.656	1.11863		0.0896	0.112	1.05387		0.0896	0.912	1.06471		41.48	4.656	1.12352		41.48	4.656	1.10739
0.0896	4.96	1.15662		0.0896	4.96	1.15347		0.0896	0.12	1.05555		0.0896	0.92	1.05858		41.48	4.96	1.1581		41.48	4.96	1.12771
0.0896	5.264	1.20334		0.0896	5.264	1.19643		0.0896	0.128	1.05746		0.0896	0.928	1.05353		41.48	5.264	1.20006		41.48	5.264	1.15149
0.0896	5.568	1.25873		0.0896	5.568	1.24688		0.0896	0.136	1.05962		0.0896	0.936	1.05023		41.48	5.568	1.24954		41.48	5.568	1.17869
0.0896	5.872	1.32295		0.0896	5.872	1.30418		0.0896	0.144	1.06204		0.0896	0.944	1.04837		41.48	5.872	1.30656		41.48	5.872	1.20934
0.0896	6.176	1.39628		0.0896	6.176	1.36767		0.0896	0.152	1.06472		0.0896	0.952	1.04789		41.48	6.176	1.37098		41.48	6.176	1.24334
0.0896	6.48	1.47885		0.0896	6.48	1.43672		0.0896	0.16	1.06768		0.0896	0.96	1.04866		41.48	6.48	1.44252		41.48	6.48	1.27822
0.0896	6.784	1.57085		0.0896	6.784	1.51074		0.0896	0.168	1.07075		0.0896	0.968	1.05059		41.48	6.784	1.52074		41.48	6.784	1.31517
0.0896	7.088	1.67271		0.0896	7.088	1.58919		0.0896	0.176	1.07406		0.0896	0.976	1.05354		41.48	7.088	1.60507		41.48	7.088	1.35442
0.0896	7.392	1.78627		0.0896	7.392	1.67158		0.0896	0.184	1.07763		0.0896	0.984	1.05738		41.48	7.392	1.6948		41.48	7.392	1.39577
0.0896	7.696	1.91165		0.0896	7.696	1.75751		0.0896	0.192	1.08149		0.0896	0.992	1.06197		41.48	7.696	1.78915		41.48	7.696	1.43905
0.0896	8	2.04866		0.0896	8	1.84663		0.0896	0.2	1.08563		0.0896	1	1.06718		41.48	8	1.88729		41.48	8	1.48411
0.096	0.4	1.05699		0.096	0.4	1.05147		0.096	0	1.04937		0.096	0.8	1.48648		41.8	0.4	1.05573		41.8	0.4	1.05355
0.096	0.704	1.05518		0.096	0.704	1.0499		0.096	0.008	1.04818		0.096	0.808	1.44756		41.8	0.704	1.05403		41.8	0.704	1.05182
0.096	1.008	1.05265		0.096	1.008	1.04789		0.096	0.016	1.04712		0.096	0.816	1.40952		41.8	1.008	1.05168		41.8	1.008	1.04959
0.096	1.312	1.04979		0.096	1.312	1.04589		0.096	0.024	1.04618		0.096	0.824	1.37241		41.8	1.312	1.04904		41.8	1.312	1.04731
0.096	1.616	1.04702		0.096	1.616	1.04435		0.096	0.032	1.04539		0.096	0.832	1.33638		41.8	1.616	1.04658		41.8	1.616	1.04547
0.096	1.92	1.04485		0.096	1.92	1.04369		0.096	0.04	1.04473		0.096	0.84	1.30156		41.8	1.92	1.04484		41.8	1.92	1.04447
0.096	2.224	1.04374		0.096	2.224	1.0442		0.096	0.048	1.04423		0.096	0.848	1.26812		41.8	2.224	1.04444		41.8	2.224	1.04462
0.096	2.528	1.04414		0.096	2.528	1.04608		0.096	0.056	1.04388		0.096	0.856	1.23624		41.8	2.528	1.04604		41.8	2.528	1.04611
0.096	2.832	1.0464		0.096	2.832	1.04941		0.096	0.064	1.04371		0.096	0.864	1.20612		41.8	2.832	1.05032		41.8	2.832	1.049
0.096	3.136	1.05077		0.096	3.136	1.05416		0.096	0.072	1.04371		0.096	0.872	1.17797		41.8	3.136	1.05799		41.8	3.136	1.05327
0.096	3.44	1.05851		0.096	3.44	1.06033		0.096	0.08	1.04389		0.096	0.88	1.15203		41.8	3.44	1.06972		41.8	3.44	1.05883
0.096	3.744	1.07311		0.096	3.744	1.0726		0.096	0.088	1.04427		0.096	0.888	1.12855		41.8	3.744	1.08618		41.8	3.744	1.06571
0.096	4.048	1.09543		0.096	4.048	1.09388		0.096	0.096	1.04486		0.096	0.896	1.10781		41.8	4.048	1.108		41.8	4.048	1.07579
0.096	4.352	1.126		0.096	4.352	1.12403		0.096	0.104	1.04565		0.096	0.904	1.08995		41.8	4.352	1.13573		41.8	4.352	1.08961
0.096	4.656	1.16525		0.096	4.656	1.16272		0.096	0.112	1.04667		0.096	0.912	1.075		41.8	4.656	1.16989		41.8	4.656	1.10707
0.096	4.96	1.21352		0.096	4.96	1.20947		0.096	0.12	1.04792		0.096	0.92	1.06343		41.8	4.96	1.21087		41.8	4.96	1.12809
0.096	5.264	1.271		0.096	5.264	1.2637		0.096	0.128	1.04941		0.096	0.928	1.05571		41.8	5.264	1.25897		41.8	5.264	1.15258
0.096	5.568	1.33733		0.096	5.568	1.32481		0.096	0.136	1.05115		0.096	0.936	1.05039		41.8	5.568	1.31435		41.8	5.568	1.18048
0.096	5.872	1.41311		0.096	5.872	1.39217		0.096	0.144	1.05315		0.096	0.944	1.04668		41.8	5.872	1.377		41.8	5.872	1.21179
0.096	6.176	1.49854		0.096	6.176	1.46516		0.096	0.152	1.05543		0.096	0.952	1.04447		41.8	6.176	1.44677		41.8	6.176	1.2463
0.096	6.48	1.59386		0.096	6.48	1.54319		0.096	0.16	1.05798		0.096	0.96	1.04369		41.8	6.48	1.52328		41.8	6.48	1.28228
0.096	6.784	1.69958		0.096	6.784	1.62575		0.096	0.168	1.06083		0.096	0.968	1.04422		41.8	6.784	1.60602		41.8	6.784	1.31979
0.096	7.088	1.81762		0.096	7.088	1.71236		0.096	0.176	1.06393		0.096	0.976	1.04594		41.8	7.088	1.69427		41.8	7.088	1.35958
0.096	7.392	1.94818		0.096	7.392	1.8026		0.096	0.184	1.06718		0.096	0.984	1.04872		41.8	7.392	1.78723		41.8	7.392	1.40154
0.096	7.696	2.09107		0.096	7.696	1.89613		0.096	0.192	1.07073		0.096	0.992	1.05243		41.8	7.696	1.88402		41.8	7.696	1.44543
0.096	8	2.24609		0.096	8	1.99272		0.096	0.2	1.07476		0.096	1	1.05691		41.8	8	1.98394		41.8	8	1.4912
0.1024	0.4	1.05587		0.1024	0.4	1.05934		0.1024	0	1.06356		0.1024	0.8	1.54637		42.12	0.4	1.05835		42.12	0.4	1.06962
0.1024	0.704	1.05517		0.1024	0.704	1.05798		0.1024	0.008	1.06194		0.1024	0.808	1.50695		42.12	0.704	1.05779		42.12	0.704	1.06754
0.1024	1.008	1.05435		0.1024	1.008	1.0563		0.1024	0.016	1.06043		0.1024	0.816	1.46804		42.12	1.008	1.05722		42.12	1.008	1.0648
0.1024	1.312	1.05374		0.1024	1.312	1.05475		0.1024	0.024	1.05906		0.1024	0.824	1.43008		42.12	1.312	1.05698		42.12	1.312	1.06189
0.1024	1.616	1.05373		0.1024	1.616	1.05377		0.1024	0.032	1.05782		0.1024	0.832	1.39306		42.12	1.616	1.05752		42.12	1.616	1.05934
0.1024	1.92	1.05473		0.1024	1.92	1.05378		0.1024	0.04	1.05672		0.1024	0.84	1.35724		42.12	1.92	1.05935		42.12	1.92	1.05758
0.1024	2.224	1.05713		0.1024	2.224	1.05506		0.1024	0.048	1.05578		0.1024	0.848	1.32253		42.12	2.224	1.06307		42.12	2.224	1.05698
0.1024	2.528	1.06129		0.1024	2.528	1.05781		0.1024	0.056	1.055		0.1024	0.856	1.28916		42.12	2.528	1.0693		42.12	2.528	1.05774
0.1024	2.832	1.06745		0.1024	2.832	1.06208		0.1024	0.064	1.05438		0.1024	0.864	1.25729		42.12	2.832	1.07868		42.12	2.832	1.05995
0.1024	3.136	1.07707		0.1024	3.136	1.06951		0.1024	0.072	1.05394		0.1024	0.872	1.22709		42.12	3.136	1.09184		42.12	3.136	1.06361
0.1024	3.44	1.09333		0.1024	3.44	1.0851		0.1024	0.08	1.05369		0.1024	0.88	1.19878		42.12	3.44	1.1094		42.12	3.44	1.06864
0.1024	3.744	1.11706		0.1024	3.744	1.1094		0.1024	0.088	1.05364		0.1024	0.888	1.17255		42.12	3.744	1.13194		42.12	3.744	1.07516
0.1024	4.048	1.1489		0.1024	4.048	1.1424		0.1024	0.096	1.05379		0.1024	0.896	1.14849		42.12	4.048	1.16002		42.12	4.048	1.08518
0.1024	4.352	1.18936		0.1024	4.352	1.18385		0.1024	0.104	1.05415		0.1024	0.904	1.12652		42.12	4.352	1.19409		42.12	4.352	1.09907
0.1024	4.656	1.23888		0.1024	4.656	1.23337		0.1024	0.112	1.05475		0.1024	0.912	1.107		42.12	4.656	1.23455		42.12	4.656	1.11671
0.1024	4.96	1.29781		0.1024	4.96	1.29043		0.1024	0.12	1.05557		0.1024	0.92	1.09033		42.12	4.96	1.28169		42.12	4.96	1.138
0.1024	5.264	1.36609		0.1024	5.264	1.35446		0.1024	0.128	1.05664		0.1024	0.928	1.07689		42.12	5.264	1.33569		42.12	5.264	1.16282
0.1024	5.568	1.4439		0.1024	5.568	1.42487		0.1024	0.136	1.05797		0.1024	0.936	1.0671		42.12	5.568	1.39657		42.12	5.568	1.1911
0.1024	5.872	1.53175		0.1024	5.872	1.50105		0.1024	0.144	1.05966		0.1024	0.944	1.06112		42.12	5.872	1.46422		42.12	5.872	1.22281
0.1024	6.176	1.62992		0.1024	6.176	1.58243		0.1024	0.152	1.06194		0.1024	0.952	1.05713		42.12	6.176	1.53835		42.12	6.176	1.25798
0.1024	6.48	1.73899		0.1024	6.48	1.66848		0.1024	0.16	1.06481		0.1024	0.96	1.05468		42.12	6.48	1.61852		42.12	6.48	1.29509
0.1024	6.784	1.86099		0.1024	6.784	1.75873		0.1024	0.168	1.0683		0.1024	0.968	1.05367		42.12	6.784	1.70411		42.12	6.784	1.33332
0.1024	7.088	1.99618		0.1024	7.088	1.85276		0.1024	0.176	1.07242		0.1024	0.976	1.05401		42.12	7.088	1.79442		42.12	7.088	1.3739
0.1024	7.392	2.14439		0.1024	7.392	1.95026		0.1024	0.184	1.07693		0.1024	0.984	1.05556		42.12	7.392	1.88865		42.12	7.392	1.41668
0.1024	7.696	2.30541		0.1024	7.696	2.05099		0.1024	0.192	1.08203		0.1024	0.992	1.05819		42.12	7.696	1.98599		42.12	7.696	1.46155
0.1024	8	2.47905		0.1024	8	2.15493		0.1024	0.2	1.08775		0.1024	1	1.06178		42.12	8	2.08612		42.12	8	1.50752
0.1088	0.4	1.0781		0.1088	0.4	1.08163		0.1088	0	1.09269		0.1088	0.8	1.61843		42.44	0.4	1.08834		42.44	0.4	1.10604
0.1088	0.704	1.07847		0.1088	0.704	1.08054		0.1088	0.008	1.09064		0.1088	0.808	1.57888		42.44	0.704	1.08874		42.44	0.704	1.10354
0.1088	1.008	1.07928		0.1088	1.008	1.07927		0.1088	0.016	1.08871		0.1088	0.816	1.53971		42.44	1.008	1.08964		42.44	1.008	1.10017
0.1088	1.312	1.08081		0.1088	1.312	1.07827		0.1088	0.024	1.08691		0.1088	0.824	1.50127		42.44	1.312	1.09137		42.44	1.312	1.09647
0.1088	1.616	1.08339		0.1088	1.616	1.078		0.1088	0.032	1.08524		0.1088	0.832	1.46365		42.44	1.616	1.09438		42.44	1.616	1.09299
0.1088	1.92	1.08735		0.1088	1.92	1.07883		0.1088	0.04	1.08372		0.1088	0.84	1.42694		42.44	1.92	1.09918		42.44	1.92	1.09023
0.1088	2.224	1.093		0.1088	2.224	1.08107		0.1088	0.048	1.08235		0.1088	0.848	1.39126		42.44	2.224	1.10632		42.44	2.224	1.08857
0.1088	2.528	1.10059		0.1088	2.528	1.08508		0.1088	0.056	1.08113		0.1088	0.856	1.35674		42.44	2.528	1.1164		42.44	2.528	1.08827
0.1088	2.832	1.11202		0.1088	2.832	1.09497		0.1088	0.064	1.08009		0.1088	0.864	1.32375		42.44	2.832	1.13002		42.44	2.832	1.08944
0.1088	3.136	1.12978		0.1088	3.136	1.11287		0.1088	0.072	1.07923		0.1088	0.872	1.29211		42.44	3.136	1.14776		42.44	3.136	1.0921
0.1088	3.44	1.15474		0.1088	3.44	1.13919		0.1088	0.08	1.07855		0.1088	0.88	1.26207		42.44	3.44	1.17019		42.44	3.44	1.09619
0.1088	3.744	1.18763		0.1088	3.744	1.17403		0.1088	0.088	1.07807		0.1088	0.888	1.23362		42.44	3.744	1.19781		42.44	3.744	1.10166
0.1088	4.048	1.22905		0.1088	4.048	1.21728		0.1088	0.096	1.07801		0.1088	0.896	1.20663		42.44	4.048	1.23108		42.44	4.048	1.11071
0.1088	4.352	1.27951		0.1088	4.352	1.26862		0.1088	0.104	1.07847		0.1088	0.904	1.18144		42.44	4.352	1.27037		42.44	4.352	1.12384
0.1088	4.656	1.33946		0.1088	4.656	1.32761		0.1088	0.112	1.07946		0.1088	0.912	1.15835		42.44	4.656	1.31597		42.44	4.656	1.1409
0.1088	4.96	1.4093		0.1088	4.96	1.39371		0.1088	0.12	1.081		0.1088	0.92	1.13767		42.44	4.96	1.36806		42.44	4.96	1.16176
0.1088	5.264	1.4887		0.1088	5.264	1.46635		0.1088	0.128	1.08311		0.1088	0.928	1.11974		42.44	5.264	1.4267		42.44	5.264	1.18626
0.1088	5.568	1.57847		0.1088	5.568	1.54495		0.1088	0.136	1.08579		0.1088	0.936	1.10489		42.44	5.568	1.49179		42.44	5.568	1.21433
0.1088	5.872	1.67899		0.1088	5.872	1.62869		0.1088	0.144	1.08906		0.1088	0.944	1.09347		42.44	5.872	1.56311		42.44	5.872	1.24598
0.1088	6.176	1.79086		0.1088	6.176	1.71745		0.1088	0.152	1.09293		0.1088	0.952	1.08584		42.44	6.176	1.64029		42.44	6.176	1.28112
0.1088	6.48	1.91622		0.1088	6.48	1.81059		0.1088	0.16	1.09741		0.1088	0.96	1.08162		42.44	6.48	1.72281		42.44	6.48	1.31915
0.1088	6.784	2.05542		0.1088	6.784	1.90764		0.1088	0.168	1.10252		0.1088	0.968	1.07908		42.44	6.784	1.81003		42.44	6.784	1.3578
0.1088	7.088	2.20831		0.1088	7.088	2.00822		0.1088	0.176	1.10826		0.1088	0.976	1.07802		42.44	7.088	1.90125		42.44	7.088	1.39891
0.1088	7.392	2.37469		0.1088	7.392	2.11199		0.1088	0.184	1.11439		0.1088	0.984	1.07832		42.44	7.392	1.99571		42.44	7.392	1.44238
0.1088	7.696	2.55435		0.1088	7.696	2.21863		0.1088	0.192	1.12115		0.1088	0.992	1.07982		42.44	7.696	2.09266		42.44	7.696	1.48814
0.1088	8	2.74707		0.1088	8	2.32785		0.1088	0.2	1.12852		0.1088	1	1.0824		42.44	8	2.19212		42.44	8	1.53342
0.1152	0.4	1.12298		0.1152	0.4	1.1239		0.1152	0	1.1366		0.1152	0.8	1.70265		42.76	0.4	1.14491		42.76	0.4	1.1681
0.1152	0.704	1.12434		0.1152	0.704	1.12324		0.1152	0.008	1.13413		0.1152	0.808	1.66288		42.76	0.704	1.14607		42.76	0.704	1.16521
0.1152	1.008	1.12668		0.1152	1.008	1.1226		0.1152	0.016	1.13179		0.1152	0.816	1.62372		42.76	1.008	1.14814		42.76	1.008	1.16126
0.1152	1.312	1.1302		0.1152	1.312	1.1224		0.1152	0.024	1.12957		0.1152	0.824	1.58517		42.76	1.312	1.15145		42.76	1.312	1.15681
0.1152	1.616	1.13516		0.1152	1.616	1.12305		0.1152	0.032	1.12749		0.1152	0.832	1.54732		42.76	1.616	1.15645		42.76	1.616	1.15245
0.1152	1.92	1.14183		0.1152	1.92	1.12491		0.1152	0.04	1.12559		0.1152	0.84	1.51027		42.76	1.92	1.16362		42.76	1.92	1.1487
0.1152	2.224	1.15055		0.1152	2.224	1.13011		0.1152	0.048	1.12409		0.1152	0.848	1.47411		42.76	2.224	1.17351		42.76	2.224	1.14599
0.1152	2.528	1.16365		0.1152	2.528	1.14188		0.1152	0.056	1.12305		0.1152	0.856	1.43896		42.76	2.528	1.18668		42.76	2.528	1.14459
0.1152	2.832	1.18274		0.1152	2.832	1.16112		0.1152	0.064	1.12249		0.1152	0.864	1.40494		42.76	2.832	1.2037		42.76	2.832	1.14464
0.1152	3.136	1.20872		0.1152	3.136	1.18843		0.1152	0.072	1.12242		0.1152	0.872	1.3722		42.76	3.136	1.22512		42.76	3.136	1.1462
0.1152	3.44	1.24241		0.1152	3.44	1.22407		0.1152	0.08	1.12284		0.1152	0.88	1.34053		42.76	3.44	1.25142		42.76	3.44	1.14921
0.1152	3.744	1.2845		0.1152	3.744	1.26805		0.1152	0.088	1.12377		0.1152	0.888	1.30989		42.76	3.744	1.28306		42.76	3.744	1.15346
0.1152	4.048	1.33558		0.1152	4.048	1.32015		0.1152	0.096	1.12524		0.1152	0.896	1.28071		42.76	4.048	1.3204		42.76	4.048	1.15892
0.1152	4.352	1.39617		0.1152	4.352	1.38001		0.1152	0.104	1.12723		0.1152	0.904	1.25305		42.76	4.352	1.36374		42.76	4.352	1.16833
0.1152	4.656	1.46676		0.1152	4.656	1.44714		0.1152	0.112	1.12978		0.1152	0.912	1.22724		42.76	4.656	1.41324		42.76	4.656	1.1833
0.1152	4.96	1.54759		0.1152	4.96	1.52102		0.1152	0.12	1.13288		0.1152	0.92	1.20378		42.76	4.96	1.46899		42.76	4.96	1.20279
0.1152	5.264	1.63877		0.1152	5.264	1.60108		0.1152	0.128	1.13656		0.1152	0.928	1.18294		42.76	5.264	1.53094		42.76	5.264	1.22624
0.1152	5.568	1.7411		0.1152	5.568	1.68651		0.1152	0.136	1.14083		0.1152	0.936	1.1649		42.76	5.568	1.5989		42.76	5.568	1.25341
0.1152	5.872	1.85527		0.1152	5.872	1.77741		0.1152	0.144	1.14568		0.1152	0.944	1.14989		42.76	5.872	1.67255		42.76	5.872	1.28425
0.1152	6.176	1.9835		0.1152	6.176	1.8725		0.1152	0.152	1.15115		0.1152	0.952	1.13811		42.76	6.176	1.75146		42.76	6.176	1.31876
0.1152	6.48	2.12627		0.1152	6.48	1.97177		0.1152	0.16	1.15723		0.1152	0.96	1.1298		42.76	6.48	1.83508		42.76	6.48	1.35693
0.1152	6.784	2.28344		0.1152	6.784	2.0749		0.1152	0.168	1.16393		0.1152	0.968	1.12518		42.76	6.784	1.92277		42.76	6.784	1.39586
0.1152	7.088	2.45485		0.1152	7.088	2.1813		0.1152	0.176	1.17127		0.1152	0.976	1.12313		42.76	7.088	2.0137		42.76	7.088	1.43712
0.1152	7.392	2.64029		0.1152	7.392	2.29076		0.1152	0.184	1.17902		0.1152	0.984	1.12239		42.76	7.392	2.10717		42.76	7.392	1.48094
0.1152	7.696	2.83953		0.1152	7.696	2.40285		0.1152	0.192	1.18744		0.1152	0.992	1.12286		42.76	7.696	2.20328		42.76	7.696	1.52612
0.1152	8	3.05256		0.1152	8	2.51738		0.1152	0.2	1.19655		0.1152	1	1.1244		42.76	8	2.3014		42.76	8	1.5716
0.1216	0.4	1.18969		0.1216	0.4	1.18916		0.1216	0	1.19552		0.1216	0.8	1.79839		43.08	0.4	1.22667		43.08	0.4	1.25534
0.1216	0.704	1.192		0.1216	0.704	1.18883		0.1216	0.008	1.1933		0.1216	0.808	1.75876		43.08	0.704	1.22843		43.08	0.704	1.25211
0.1216	1.008	1.19572		0.1216	1.008	1.1887		0.1216	0.016	1.19151		0.1216	0.816	1.71987		43.08	1.008	1.23145		43.08	1.008	1.24766
0.1216	1.312	1.20105		0.1216	1.312	1.18912		0.1216	0.024	1.19015		0.1216	0.824	1.6814		43.08	1.312	1.23603		43.08	1.312	1.24257
0.1216	1.616	1.20818		0.1216	1.616	1.19144		0.1216	0.032	1.18922		0.1216	0.832	1.64362		43.08	1.616	1.2426		43.08	1.616	1.23746
0.1216	1.92	1.21802		0.1216	1.92	1.19826		0.1216	0.04	1.18875		0.1216	0.84	1.60649		43.08	1.92	1.25157		43.08	1.92	1.23289
0.1216	2.224	1.23249		0.1216	2.224	1.21094		0.1216	0.048	1.18874		0.1216	0.848	1.57017		43.08	2.224	1.26354		43.08	2.224	1.2293
0.1216	2.528	1.25262		0.1216	2.528	1.23054		0.1216	0.056	1.18921		0.1216	0.856	1.53472		43.08	2.528	1.27906		43.08	2.528	1.22696
0.1216	2.832	1.27935		0.1216	2.832	1.25781		0.1216	0.064	1.19017		0.1216	0.864	1.50025		43.08	2.832	1.29864		43.08	2.832	1.22594
0.1216	3.136	1.31356		0.1216	3.136	1.29317		0.1216	0.072	1.19162		0.1216	0.872	1.4664		43.08	3.136	1.32279		43.08	3.136	1.22641
0.1216	3.44	1.35601		0.1216	3.44	1.33677		0.1216	0.08	1.19358		0.1216	0.88	1.43332		43.08	3.44	1.35196		43.08	3.44	1.22834
0.1216	3.744	1.40742		0.1216	3.744	1.38854		0.1216	0.088	1.19607		0.1216	0.888	1.40151		43.08	3.744	1.38653		43.08	3.744	1.23164
0.1216	4.048	1.46842		0.1216	4.048	1.44819		0.1216	0.096	1.19908		0.1216	0.896	1.37152		43.08	4.048	1.42678		43.08	4.048	1.2362
0.1216	4.352	1.53958		0.1216	4.352	1.51532		0.1216	0.104	1.20264		0.1216	0.904	1.34318		43.08	4.352	1.47293		43.08	4.352	1.24188
0.1216	4.656	1.62145		0.1216	4.656	1.58943		0.1216	0.112	1.20675		0.1216	0.912	1.31677		43.08	4.656	1.52506		43.08	4.656	1.25127
0.1216	4.96	1.7141		0.1216	4.96	1.66999		0.1216	0.12	1.21143		0.1216	0.92	1.29234		43.08	4.96	1.58315		43.08	4.96	1.26634
0.1216	5.264	1.81816		0.1216	5.264	1.75645		0.1216	0.128	1.21669		0.1216	0.928	1.2703		43.08	5.264	1.64707		43.08	5.264	1.28698
0.1216	5.568	1.93448		0.1216	5.568	1.84828		0.1216	0.136	1.22257		0.1216	0.936	1.25047		43.08	5.568	1.71656		43.08	5.568	1.31229
0.1216	5.872	2.06539		0.1216	5.872	1.94461		0.1216	0.144	1.22907		0.1216	0.944	1.23311		43.08	5.872	1.79124		43.08	5.872	1.34175
0.1216	6.176	2.21144		0.1216	6.176	2.04563		0.1216	0.152	1.23622		0.1216	0.952	1.21839		43.08	6.176	1.87064		43.08	6.176	1.37496
0.1216	6.48	2.37254		0.1216	6.48	2.15058		0.1216	0.16	1.24402		0.1216	0.96	1.20648		43.08	6.48	1.95404		43.08	6.48	1.41204
0.1216	6.784	2.54854		0.1216	6.784	2.25852		0.1216	0.168	1.25251		0.1216	0.968	1.19756		43.08	6.784	2.04086		43.08	6.784	1.45131
0.1216	7.088	2.73925		0.1216	7.088	2.37052		0.1216	0.176	1.26169		0.1216	0.976	1.19182		43.08	7.088	2.1305		43.08	7.088	1.49219
0.1216	7.392	2.94462		0.1216	7.392	2.48435		0.1216	0.184	1.27136		0.1216	0.984	1.18936		43.08	7.392	2.2227		43.08	7.392	1.5359
0.1216	7.696	3.1649		0.1216	7.696	2.6023		0.1216	0.192	1.28173		0.1216	0.992	1.1887		43.08	7.696	2.31716		43.08	7.696	1.5801
0.1216	8	3.39802		0.1216	8	2.7197		0.1216	0.2	1.29281		0.1216	1	1.1891		43.08	8	2.41321		43.08	8	1.6255
0.128	0.4	1.2775		0.128	0.4	1.27614		0.128	0	1.27712		0.128	0.8	1.90575		43.4	0.4	1.33165		43.4	0.4	1.36564
0.128	0.704	1.28064		0.128	0.704	1.27627		0.128	0.008	1.27641		0.128	0.808	1.86643		43.4	0.704	1.33383		43.4	0.704	1.36214
0.128	1.008	1.28562		0.128	1.008	1.27762		0.128	0.016	1.27612		0.128	0.816	1.82795		43.4	1.008	1.33749		43.4	1.008	1.35728
0.128	1.312	1.29305		0.128	1.312	1.28142		0.128	0.024	1.27627		0.128	0.824	1.78977		43.4	1.312	1.34294		43.4	1.312	1.35168
0.128	1.616	1.30402		0.128	1.616	1.28905		0.128	0.032	1.27688		0.128	0.832	1.75226		43.4	1.616	1.35059		43.4	1.616	1.34587
0.128	1.92	1.31947		0.128	1.92	1.30185		0.128	0.04	1.27796		0.128	0.84	1.7153		43.4	1.92	1.36092		43.4	1.92	1.34052
0.128	2.224	1.34037		0.128	2.224	1.32095		0.128	0.048	1.27951		0.128	0.848	1.67909		43.4	2.224	1.37442		43.4	2.224	1.33608
0.128	2.528	1.36769		0.128	2.528	1.34726		0.128	0.056	1.28156		0.128	0.856	1.64372		43.4	2.528	1.39161		43.4	2.528	1.33287
0.128	2.832	1.40234		0.128	2.832	1.38137		0.128	0.064	1.28411		0.128	0.864	1.60938		43.4	2.832	1.41299		43.4	2.832	1.33108
0.128	3.136	1.44515		0.128	3.136	1.42359		0.128	0.072	1.28718		0.128	0.872	1.5761		43.4	3.136	1.43902		43.4	3.136	1.33078
0.128	3.44	1.4969		0.128	3.44	1.47397		0.128	0.08	1.29077		0.128	0.88	1.54399		43.4	3.44	1.47009		43.4	3.44	1.33195
0.128	3.744	1.55825		0.128	3.744	1.53236		0.128	0.088	1.29491		0.128	0.888	1.51314		43.4	3.744	1.50652		43.4	3.744	1.33454
0.128	4.048	1.62985		0.128	4.048	1.59843		0.128	0.096	1.29961		0.128	0.896	1.48364		43.4	4.048	1.54854		43.4	4.048	1.33842
0.128	4.352	1.7123		0.128	4.352	1.67174		0.128	0.104	1.30488		0.128	0.904	1.4556		43.4	4.352	1.59627		43.4	4.352	1.34348
0.128	4.656	1.8062		0.128	4.656	1.7518		0.128	0.112	1.31073		0.128	0.912	1.42912		43.4	4.656	1.64974		43.4	4.656	1.34956
0.128	4.96	1.91152		0.128	4.96	1.83808		0.128	0.12	1.31719		0.128	0.92	1.40431		43.4	4.96	1.70885		43.4	4.96	1.3592
0.128	5.264	2.0295		0.128	5.264	1.93008		0.128	0.128	1.32426		0.128	0.928	1.38129		43.4	5.264	1.77339		43.4	5.264	1.37439
0.128	5.568	2.16256		0.128	5.568	2.0273		0.128	0.136	1.33196		0.128	0.936	1.36019		43.4	5.568	1.84304		43.4	5.568	1.39518
0.128	5.872	2.31131		0.128	5.872	2.12934		0.128	0.144	1.3403		0.128	0.944	1.34112		43.4	5.872	1.91741		43.4	5.872	1.42131
0.128	6.176	2.47572		0.128	6.176	2.23539		0.128	0.152	1.34931		0.128	0.952	1.32421		43.4	6.176	1.99597		43.4	6.176	1.45194
0.128	6.48	2.65568		0.128	6.48	2.34428		0.128	0.16	1.35898		0.128	0.96	1.30972		43.4	6.48	2.07817		43.4	6.48	1.48741
0.128	6.784	2.85116		0.128	6.784	2.45802		0.128	0.168	1.36936		0.128	0.968	1.29763		43.4	6.784	2.1634		43.4	6.784	1.52661
0.128	7.088	3.06236		0.128	7.088	2.57805		0.128	0.176	1.38044		0.128	0.976	1.2881		43.4	7.088	2.25117		43.4	7.088	1.56653
0.128	7.392	3.28919		0.128	7.392	2.70343		0.128	0.184	1.39204		0.128	0.984	1.28127		43.4	7.392	2.3414		43.4	7.392	1.60955
0.128	7.696	3.5321		0.128	7.696	2.82135		0.128	0.192	1.40435		0.128	0.992	1.27728		43.4	7.696	2.43349		43.4	7.696	1.65256
0.128	8	3.79271		0.128	8	2.94333		0.128	0.2	1.41738		0.128	1	1.27612		43.4	8	2.52682		43.4	8	1.69746
0.1344	0.4	1.38964		0.1344	0.4	1.38844		0.1344	0	1.38764		0.1344	0.8	2.02622		43.72	0.4	1.45804		43.72	0.4	1.49631
0.1344	0.704	1.39427		0.1344	0.704	1.39064		0.1344	0.008	1.38856		0.1344	0.808	1.98774		43.72	0.704	1.46048		43.72	0.704	1.49254
0.1344	1.008	1.40196		0.1344	1.008	1.39503		0.1344	0.016	1.38989		0.1344	0.816	1.95042		43.72	1.008	1.46452		43.72	1.008	1.4873
0.1344	1.312	1.41337		0.1344	1.312	1.40275		0.1344	0.024	1.39168		0.1344	0.824	1.9137		43.72	1.312	1.47049		43.72	1.312	1.48119
0.1344	1.616	1.42927		0.1344	1.616	1.41501		0.1344	0.032	1.39392		0.1344	0.832	1.87785		43.72	1.616	1.47876		43.72	1.616	1.47489
0.1344	1.92	1.45055		0.1344	1.92	1.43308		0.1344	0.04	1.39664		0.1344	0.84	1.84236		43.72	1.92	1.48981		43.72	1.92	1.46899
0.1344	2.224	1.47811		0.1344	2.224	1.4578		0.1344	0.048	1.39985		0.1344	0.848	1.80766		43.72	2.224	1.50412		43.72	2.224	1.46399
0.1344	2.528	1.51288		0.1344	2.528	1.48997		0.1344	0.056	1.40355		0.1344	0.856	1.77375		43.72	2.528	1.52218		43.72	2.528	1.4602
0.1344	2.832	1.55571		0.1344	2.832	1.53008		0.1344	0.064	1.40777		0.1344	0.864	1.7407		43.72	2.832	1.54446		43.72	2.832	1.45784
0.1344	3.136	1.60741		0.1344	3.136	1.57834		0.1344	0.072	1.4125		0.1344	0.872	1.70857		43.72	3.136	1.57138		43.72	3.136	1.45699
0.1344	3.44	1.66874		0.1344	3.44	1.63471		0.1344	0.08	1.41777		0.1344	0.88	1.67744		43.72	3.44	1.6033		43.72	3.44	1.45763
0.1344	3.744	1.74039		0.1344	3.744	1.699		0.1344	0.088	1.42359		0.1344	0.888	1.64738		43.72	3.744	1.64048		43.72	3.744	1.45972
0.1344	4.048	1.82305		0.1344	4.048	1.77085		0.1344	0.096	1.42997		0.1344	0.896	1.61846		43.72	4.048	1.6831		43.72	4.048	1.46315
0.1344	4.352	1.91736		0.1344	4.352	1.84979		0.1344	0.104	1.43692		0.1344	0.904	1.59076		43.72	4.352	1.73123		43.72	4.352	1.46779
0.1344	4.656	2.02379		0.1344	4.656	1.93534		0.1344	0.112	1.44447		0.1344	0.912	1.56437		43.72	4.656	1.78484		43.72	4.656	1.47358
0.1344	4.96	2.14287		0.1344	4.96	2.02695		0.1344	0.12	1.45263		0.1344	0.92	1.53939		43.72	4.96	1.84378		43.72	4.96	1.48027
0.1344	5.264	2.27743		0.1344	5.264	2.12415		0.1344	0.128	1.4614		0.1344	0.928	1.51588		43.72	5.264	1.9078		43.72	5.264	1.49029
0.1344	5.568	2.4283		0.1344	5.568	2.22633		0.1344	0.136	1.47081		0.1344	0.936	1.49396		43.72	5.568	1.97656		43.72	5.568	1.5059
0.1344	5.872	2.59538		0.1344	5.872	2.33321		0.1344	0.144	1.48088		0.1344	0.944	1.47372		43.72	5.872	2.04964		43.72	5.872	1.52709
0.1344	6.176	2.77879		0.1344	6.176	2.44281		0.1344	0.152	1.49161		0.1344	0.952	1.4554		43.72	6.176	2.12652		43.72	6.176	1.5536
0.1344	6.48	2.97869		0.1344	6.48	2.55728		0.1344	0.16	1.50302		0.1344	0.96	1.4388		43.72	6.48	2.20667		43.72	6.48	1.58528
0.1344	6.784	3.19385		0.1344	6.784	2.6786		0.1344	0.168	1.51514		0.1344	0.968	1.42418		43.72	6.784	2.28951		43.72	6.784	1.6218
0.1344	7.088	3.42485		0.1344	7.088	2.7936		0.1344	0.176	1.52798		0.1344	0.976	1.41165		43.72	7.088	2.37487		43.72	7.088	1.66147
0.1344	7.392	3.67244		0.1344	7.392	2.91616		0.1344	0.184	1.54139		0.1344	0.984	1.40127		43.72	7.392	2.46238		43.72	7.392	1.70307
0.1344	7.696	3.93056		0.1344	7.696	3.03871		0.1344	0.192	1.5555		0.1344	0.992	1.39316		43.72	7.696	2.55146		43.72	7.696	1.7449
0.1344	8	4.21208		0.1344	8	3.17043		0.1344	0.2	1.57035		0.1344	1	1.38748		43.72	8	2.64151		43.72	8	1.78886
0.1408	0.4	1.53478		0.1408	0.4	1.53338		0.1408	0	1.53184		0.1408	0.8	2.16826		44.04	0.4	1.60326		44.04	0.4	1.64456
0.1408	0.704	1.54135		0.1408	0.704	1.53749		0.1408	0.008	1.53444		0.1408	0.808	2.13272		44.04	0.704	1.60577		44.04	0.704	1.64062
0.1408	1.008	1.55204		0.1408	1.008	1.54462		0.1408	0.016	1.53745		0.1408	0.816	2.09732		44.04	1.008	1.60996		44.04	1.008	1.63511
0.1408	1.312	1.56747		0.1408	1.312	1.55581		0.1408	0.024	1.54089		0.1408	0.824	2.0624		44.04	1.312	1.61609		44.04	1.312	1.62868
0.1408	1.616	1.58834		0.1408	1.616	1.57218		0.1408	0.032	1.5448		0.1408	0.832	2.02805		44.04	1.616	1.62456		44.04	1.616	1.62202
0.1408	1.92	1.61551		0.1408	1.92	1.59475		0.1408	0.04	1.54916		0.1408	0.84	1.9943		44.04	1.92	1.6358		44.04	1.92	1.61573
0.1408	2.224	1.64982		0.1408	2.224	1.62437		0.1408	0.048	1.55402		0.1408	0.848	1.9612		44.04	2.224	1.6503		44.04	2.224	1.61032
0.1408	2.528	1.69213		0.1408	2.528	1.66168		0.1408	0.056	1.55937		0.1408	0.856	1.92878		44.04	2.528	1.66851		44.04	2.528	1.60614
0.1408	2.832	1.7433		0.1408	2.832	1.70704		0.1408	0.064	1.56523		0.1408	0.864	1.8971		44.04	2.832	1.69088		44.04	2.832	1.60341
0.1408	3.136	1.80413		0.1408	3.136	1.76058		0.1408	0.072	1.57161		0.1408	0.872	1.86621		44.04	3.136	1.71781		44.04	3.136	1.60221
0.1408	3.44	1.87534		0.1408	3.44	1.82221		0.1408	0.08	1.57853		0.1408	0.88	1.83616		44.04	3.44	1.74962		44.04	3.44	1.60254
0.1408	3.744	1.95764		0.1408	3.744	1.89167		0.1408	0.088	1.58599		0.1408	0.888	1.80701		44.04	3.744	1.78653		44.04	3.744	1.60434
0.1408	4.048	2.05173		0.1408	4.048	1.96859		0.1408	0.096	1.59401		0.1408	0.896	1.77883		44.04	4.048	1.8287		44.04	4.048	1.60753
0.1408	4.352	2.15833		0.1408	4.352	2.05249		0.1408	0.104	1.6026		0.1408	0.904	1.75166		44.04	4.352	1.87614		44.04	4.352	1.61203
0.1408	4.656	2.27811		0.1408	4.656	2.14286		0.1408	0.112	1.61178		0.1408	0.912	1.72559		44.04	4.656	1.9288		44.04	4.656	1.61761
0.1408	4.96	2.41355		0.1408	4.96	2.23923		0.1408	0.12	1.62156		0.1408	0.92	1.70067		44.04	4.96	1.9865		44.04	4.96	1.62419
0.1408	5.264	2.56567		0.1408	5.264	2.34116		0.1408	0.128	1.63194		0.1408	0.928	1.67699		44.04	5.264	2.04897		44.04	5.264	1.63163
0.1408	5.568	2.73485		0.1408	5.568	2.44842		0.1408	0.136	1.64296		0.1408	0.936	1.65474		44.04	5.568	2.11586		44.04	5.568	1.64234
0.1408	5.872	2.92119		0.1408	5.872	2.56133		0.1408	0.144	1.65461		0.1408	0.944	1.63371		44.04	5.872	2.18673		44.04	5.872	1.65858
0.1408	6.176	3.12462		0.1408	6.176	2.68171		0.1408	0.152	1.66692		0.1408	0.952	1.61414		44.04	6.176	2.2611		44.04	6.176	1.68037
0.1408	6.48	3.34378		0.1408	6.48	2.80639		0.1408	0.16	1.6799		0.1408	0.96	1.59611		44.04	6.48	2.33843		44.04	6.48	1.70748
0.1408	6.784	3.57923		0.1408	6.784	2.92579		0.1408	0.168	1.69357		0.1408	0.968	1.5797		44.04	6.784	2.4183		44.04	6.784	1.73979
0.1408	7.088	3.83211		0.1408	7.088	3.03188		0.1408	0.176	1.70794		0.1408	0.976	1.565		44.04	7.088	2.50061		44.04	7.088	1.77684
0.1408	7.392	4.09498		0.1408	7.392	3.1578		0.1408	0.184	1.72292		0.1408	0.984	1.55223		44.04	7.392	2.5848		44.04	7.392	1.81668
0.1408	7.696	4.37785		0.1408	7.696	3.28116		0.1408	0.192	1.73854		0.1408	0.992	1.54072		44.04	7.696	2.67033		44.04	7.696	1.85728
0.1408	8	4.66656		0.1408	8	3.40669		0.1408	0.2	1.75489		0.1408	1	1.53027		44.04	8	2.75663		44.04	8	1.89984
0.1472	0.4	1.71142		0.1472	0.4	1.70992		0.1472	0	1.70754		0.1472	0.8	2.33693		44.36	0.4	1.7643		44.36	0.4	1.80761
0.1472	0.704	1.71983		0.1472	0.704	1.71553		0.1472	0.008	1.71181		0.1472	0.808	2.30293		44.36	0.704	1.76674		44.36	0.704	1.80353
0.1472	1.008	1.7336		0.1472	1.008	1.72498		0.1472	0.016	1.71648		0.1472	0.816	2.26934		44.36	1.008	1.77082		44.36	1.008	1.79783
0.1472	1.312	1.75304		0.1472	1.312	1.73919		0.1472	0.024	1.72156		0.1472	0.824	2.23638		44.36	1.312	1.7768		44.36	1.312	1.79117
0.1472	1.616	1.77896		0.1472	1.616	1.75912		0.1472	0.032	1.72708		0.1472	0.832	2.20379		44.36	1.616	1.78506		44.36	1.616	1.78424
0.1472	1.92	1.81211		0.1472	1.92	1.78566		0.1472	0.04	1.7331		0.1472	0.84	2.17163		44.36	1.92	1.79601		44.36	1.92	1.77769
0.1472	2.224	1.85331		0.1472	2.224	1.81956		0.1472	0.048	1.73959		0.1472	0.848	2.14004		44.36	2.224	1.81011		44.36	2.224	1.77202
0.1472	2.528	1.90335		0.1472	2.528	1.86132		0.1472	0.056	1.74658		0.1472	0.856	2.10907		44.36	2.528	1.82782		44.36	2.528	1.76761
0.1472	2.832	1.96305		0.1472	2.832	1.91122		0.1472	0.064	1.75408		0.1472	0.864	2.07874		44.36	2.832	1.84956		44.36	2.832	1.76467
0.1472	3.136	2.03319		0.1472	3.136	1.96933		0.1472	0.072	1.7621		0.1472	0.872	2.04909		44.36	3.136	1.87569		44.36	3.136	1.7633
0.1472	3.44	2.11451		0.1472	3.44	2.03549		0.1472	0.08	1.77064		0.1472	0.88	2.02016		44.36	3.44	1.90653		44.36	3.44	1.7635
0.1472	3.744	2.2078		0.1472	3.744	2.10941		0.1472	0.088	1.77972		0.1472	0.888	1.99199		44.36	3.744	1.94228		44.36	3.744	1.76521
0.1472	4.048	2.31377		0.1472	4.048	2.19069		0.1472	0.096	1.78936		0.1472	0.896	1.96463		44.36	4.048	1.98306		44.36	4.048	1.7684
0.1472	4.352	2.43349		0.1472	4.352	2.27884		0.1472	0.104	1.79955		0.1472	0.904	1.93812		44.36	4.352	2.02888		44.36	4.352	1.77283
0.1472	4.656	2.56937		0.1472	4.656	2.37339		0.1472	0.112	1.81033		0.1472	0.912	1.91253		44.36	4.656	2.07966		44.36	4.656	1.77844
0.1472	4.96	2.7223		0.1472	4.96	2.47388		0.1472	0.12	1.82169		0.1472	0.92	1.88791		44.36	4.96	2.1352		44.36	4.96	1.78508
0.1472	5.264	2.89288		0.1472	5.264	2.58005		0.1472	0.128	1.83364		0.1472	0.928	1.8643		44.36	5.264	2.19525		44.36	5.264	1.79262
0.1472	5.568	3.08128		0.1472	5.568	2.69216		0.1472	0.136	1.84621		0.1472	0.936	1.84177		44.36	5.568	2.25943		44.36	5.568	1.80092
0.1472	5.872	3.28646		0.1472	5.872	2.81178		0.1472	0.144	1.8594		0.1472	0.944	1.82038		44.36	5.872	2.32733		44.36	5.872	1.81251
0.1472	6.176	3.50936		0.1472	6.176	2.93841		0.1472	0.152	1.87324		0.1472	0.952	1.80018		44.36	6.176	2.39849		44.36	6.176	1.82957
0.1472	6.48	3.74912		0.1472	6.48	3.03973		0.1472	0.16	1.88773		0.1472	0.96	1.78124		44.36	6.48	2.47239		44.36	6.48	1.85211
0.1472	6.784	4.00285		0.1472	6.784	3.16431		0.1472	0.168	1.90288		0.1472	0.968	1.76362		44.36	6.784	2.54881		44.36	6.784	1.8799
0.1472	7.088	4.27441		0.1472	7.088	3.28659		0.1472	0.176	1.91872		0.1472	0.976	1.74748		44.36	7.088	2.62748		44.36	7.088	1.91288
0.1472	7.392	4.55738		0.1472	7.392	3.41707		0.1472	0.184	1.93521		0.1472	0.984	1.73264		44.36	7.392	2.70785		44.36	7.392	1.95037
0.1472	7.696	4.86149		0.1472	7.696	3.53813		0.1472	0.192	1.95226		0.1472	0.992	1.71944		44.36	7.696	2.78938		44.36	7.696	1.98896
0.1472	8	5.18209		0.1472	8	3.6677		0.1472	0.2	1.97002		0.1472	1	1.70408		44.36	8	2.87157		44.36	8	2.02946
0.1536	0.4	1.91783		0.1536	0.4	1.9161		0.1536	0	1.91309		0.1536	0.8	2.53192		44.68	0.4	1.9378		44.68	0.4	1.9824
0.1536	0.704	1.92826		0.1536	0.704	1.92306		0.1536	0.008	1.91902		0.1536	0.808	2.5001		44.68	0.704	1.94009		44.68	0.704	1.97822
0.1536	1.008	1.9451		0.1536	1.008	1.93455		0.1536	0.016	1.92528		0.1536	0.816	2.46742		44.68	1.008	1.94386		44.68	1.008	1.97238
0.1536	1.312	1.96869		0.1536	1.312	1.95138		0.1536	0.024	1.932		0.1536	0.824	2.43488		44.68	1.312	1.94942		44.68	1.312	1.96554
0.1536	1.616	1.99974		0.1536	1.616	1.97438		0.1536	0.032	1.93925		0.1536	0.832	2.40394		44.68	1.616	1.9571		44.68	1.616	1.95843
0.1536	1.92	2.03893		0.1536	1.92	2.00435		0.1536	0.04	1.94695		0.1536	0.84	2.37358		44.68	1.92	1.96734		44.68	1.92	1.9517
0.1536	2.224	2.08709		0.1536	2.224	2.04191		0.1536	0.048	1.95516		0.1536	0.848	2.34358		44.68	2.224	1.98055		44.68	2.224	1.94588
0.1536	2.528	2.14503		0.1536	2.528	2.08749		0.1536	0.056	1.96383		0.1536	0.856	2.31406		44.68	2.528	1.99719		44.68	2.528	1.94134
0.1536	2.832	2.21346		0.1536	2.832	2.14129		0.1536	0.064	1.9729		0.1536	0.864	2.28509		44.68	2.832	2.01766		44.68	2.832	1.93833
0.1536	3.136	2.29318		0.1536	3.136	2.2033		0.1536	0.072	1.98235		0.1536	0.872	2.2567		44.68	3.136	2.04232		44.68	3.136	1.93693
0.1536	3.44	2.38496		0.1536	3.44	2.27334		0.1536	0.08	1.99234		0.1536	0.88	2.22906		44.68	3.44	2.07147		44.68	3.44	1.93714
0.1536	3.744	2.48959		0.1536	3.744	2.35107		0.1536	0.088	2.00301		0.1536	0.888	2.20192		44.68	3.744	2.1053		44.68	3.744	1.93897
0.1536	4.048	2.6084		0.1536	4.048	2.43607		0.1536	0.096	2.01421		0.1536	0.896	2.17546		44.68	4.048	2.14392		44.68	4.048	1.9422
0.1536	4.352	2.74423		0.1536	4.352	2.52787		0.1536	0.104	2.02597		0.1536	0.904	2.14973		44.68	4.352	2.18734		44.68	4.352	1.94677
0.1536	4.656	2.89774		0.1536	4.656	2.62601		0.1536	0.112	2.03829		0.1536	0.912	2.12476		44.68	4.656	2.23546		44.68	4.656	1.95254
0.1536	4.96	3.06896		0.1536	4.96	2.73016		0.1536	0.12	2.05118		0.1536	0.92	2.10059		44.68	4.96	2.28812		44.68	4.96	1.95938
0.1536	5.264	3.25752		0.1536	5.264	2.84048		0.1536	0.128	2.06466		0.1536	0.928	2.07726		44.68	5.264	2.34503		44.68	5.264	1.96714
0.1536	5.568	3.46443		0.1536	5.568	2.95563		0.1536	0.136	2.07874		0.1536	0.936	2.05483		44.68	5.568	2.40585		44.68	5.568	1.97568
0.1536	5.872	3.68901		0.1536	5.872	3.07967		0.1536	0.144	2.09342		0.1536	0.944	2.03334		44.68	5.872	2.47018		44.68	5.872	1.98484
0.1536	6.176	3.93077		0.1536	6.176	3.2241		0.1536	0.152	2.10872		0.1536	0.952	2.01283		44.68	6.176	2.53757		44.68	6.176	1.9975
0.1536	6.48	4.18909		0.1536	6.48	3.30783		0.1536	0.16	2.12463		0.1536	0.96	1.99335		44.68	6.48	2.60757		44.68	6.48	2.01547
0.1536	6.784	4.46257		0.1536	6.784	3.43539		0.1536	0.168	2.14119		0.1536	0.968	1.97496		44.68	6.784	2.68007		44.68	6.784	2.03882
0.1536	7.088	4.75588		0.1536	7.088	3.55714		0.1536	0.176	2.1584		0.1536	0.976	1.95769		44.68	7.088	2.75465		44.68	7.088	2.0673
0.1536	7.392	5.06218		0.1536	7.392	3.68581		0.1536	0.184	2.1763		0.1536	0.984	1.94175		44.68	7.392	2.83079		44.68	7.392	2.10088
0.1536	7.696	5.40485		0.1536	7.696	3.80877		0.1536	0.192	2.19475		0.1536	0.992	1.92678		44.68	7.696	2.90799		44.68	7.696	2.13868
0.1536	8	5.70194		0.1536	8	3.93323		0.1536	0.2	2.21383		0.1536	1	1.90936		44.68	8	2.98576		44.68	8	2.17658
0.16	0.4	2.15321		0.16	0.4	2.15172		0.16	0	2.14746		0.16	0.8	2.75036		45	0.4	2.12059		45	0.4	2.16585
0.16	0.704	2.16555		0.16	0.704	2.15928		0.16	0.008	2.15503		0.16	0.808	2.71819		45	0.704	2.12243		45	0.704	2.16158
0.16	1.008	2.18551		0.16	1.008	2.17246		0.16	0.016	2.16255		0.16	0.816	2.68847		45	1.008	2.12574		45	1.008	2.15562
0.16	1.312	2.2132		0.16	1.312	2.19147		0.16	0.024	2.1711		0.16	0.824	2.66106		45	1.312	2.13063		45	1.312	2.14865
0.16	1.616	2.24942		0.16	1.616	2.21705		0.16	0.032	2.17971		0.16	0.832	2.63184		45	1.616	2.13746		45	1.616	2.1414
0.16	1.92	2.29471		0.16	1.92	2.24989		0.16	0.04	2.18911		0.16	0.84	2.60084		45	1.92	2.14663		45	1.92	2.13454
0.16	2.224	2.34996		0.16	2.224	2.2905		0.16	0.048	2.19878		0.16	0.848	2.57179		45	2.224	2.15856		45	2.224	2.12862
0.16	2.528	2.41579		0.16	2.528	2.33936		0.16	0.056	2.2091		0.16	0.856	2.54377		45	2.528	2.17367		45	2.528	2.12404
0.16	2.832	2.49308		0.16	2.832	2.39649		0.16	0.064	2.22034		0.16	0.864	2.5165		45	2.832	2.19238		45	2.832	2.12102
0.16	3.136	2.58259		0.16	3.136	2.46182		0.16	0.072	2.23193		0.16	0.872	2.48939		45	3.136	2.21503		45	3.136	2.11967
0.16	3.44	2.68534		0.16	3.44	2.53514		0.16	0.08	2.24254		0.16	0.88	2.4627		45	3.44	2.24191		45	3.44	2.12005
0.16	3.744	2.80297		0.16	3.744	2.61608		0.16	0.088	2.25482		0.16	0.888	2.43655		45	3.744	2.27323		45	3.744	2.12198
0.16	4.048	2.93787		0.16	4.048	2.70422		0.16	0.096	2.26823		0.16	0.896	2.41109		45	4.048	2.30909		45	4.048	2.12541
0.16	4.352	3.09074		0.16	4.352	2.79909		0.16	0.104	2.28216		0.16	0.904	2.38626		45	4.352	2.3495		45	4.352	2.13021
0.16	4.656	3.26194		0.16	4.656	2.90033		0.16	0.112	2.2948		0.16	0.912	2.36202		45	4.656	2.39439		45	4.656	2.13625
0.16	4.96	3.45033		0.16	4.96	3.00794		0.16	0.12	2.31084		0.16	0.92	2.33845		45	4.96	2.44358		45	4.96	2.14337
0.16	5.264	3.65766		0.16	5.264	3.12289		0.16	0.128	2.32382		0.16	0.928	2.31577		45	5.264	2.49681		45	5.264	2.15143
0.16	5.568	3.88322		0.16	5.568	3.24607		0.16	0.136	2.33909		0.16	0.936	2.29363		45	5.568	2.55377		45	5.568	2.16028
0.16	5.872	4.12637		0.16	5.872	3.39166		0.16	0.144	2.35525		0.16	0.944	2.27227		45	5.872	2.61407		45	5.872	2.16976
0.16	6.176	4.38691		0.16	6.176	3.6232		0.16	0.152	2.37187		0.16	0.952	2.25173		45	6.176	2.67728		45	6.176	2.17977
0.16	6.48	4.66647		0.16	6.48	4.50143		0.16	0.16	2.38925		0.16	0.96	2.23203		45	6.48	2.74303		45	6.48	2.1936
0.16	6.784	4.9612		0.16	6.784	3.7173		0.16	0.168	2.40772		0.16	0.968	2.21322		45	6.784	2.81119		45	6.784	2.21255
0.16	7.088	5.26062		0.16	7.088	3.84563		0.16	0.176	2.4273		0.16	0.976	2.19533		45	7.088	2.88133		45	7.088	2.23671
0.16	7.392	5.58739		0.16	7.392	3.96866		0.16	0.184	2.44513		0.16	0.984	2.17841		45	7.392	2.95294		45	7.392	2.26584
0.16	7.696	5.91387		0.16	7.696	4.09696		0.16	0.192	2.46893		0.16	0.992	2.16265		45	7.696	3.02555		45	7.696	2.2994
0.16	8	6.25584		0.16	8	4.21363		0.16	0.2	2.48493		0.16	1	2.14736		45	8	3.09931		45	8	2.33691
